# Supplementary material for: Identification of Small RNAs Associated with Salt Stress in Chrysanthemums through High-Throughput Sequencing and Bioinformatics Analysis
Source: MDPI journal article supplement (doi:10.3390/genes14030561), 2023-02-23

Length distribution of sequencing result (Total)

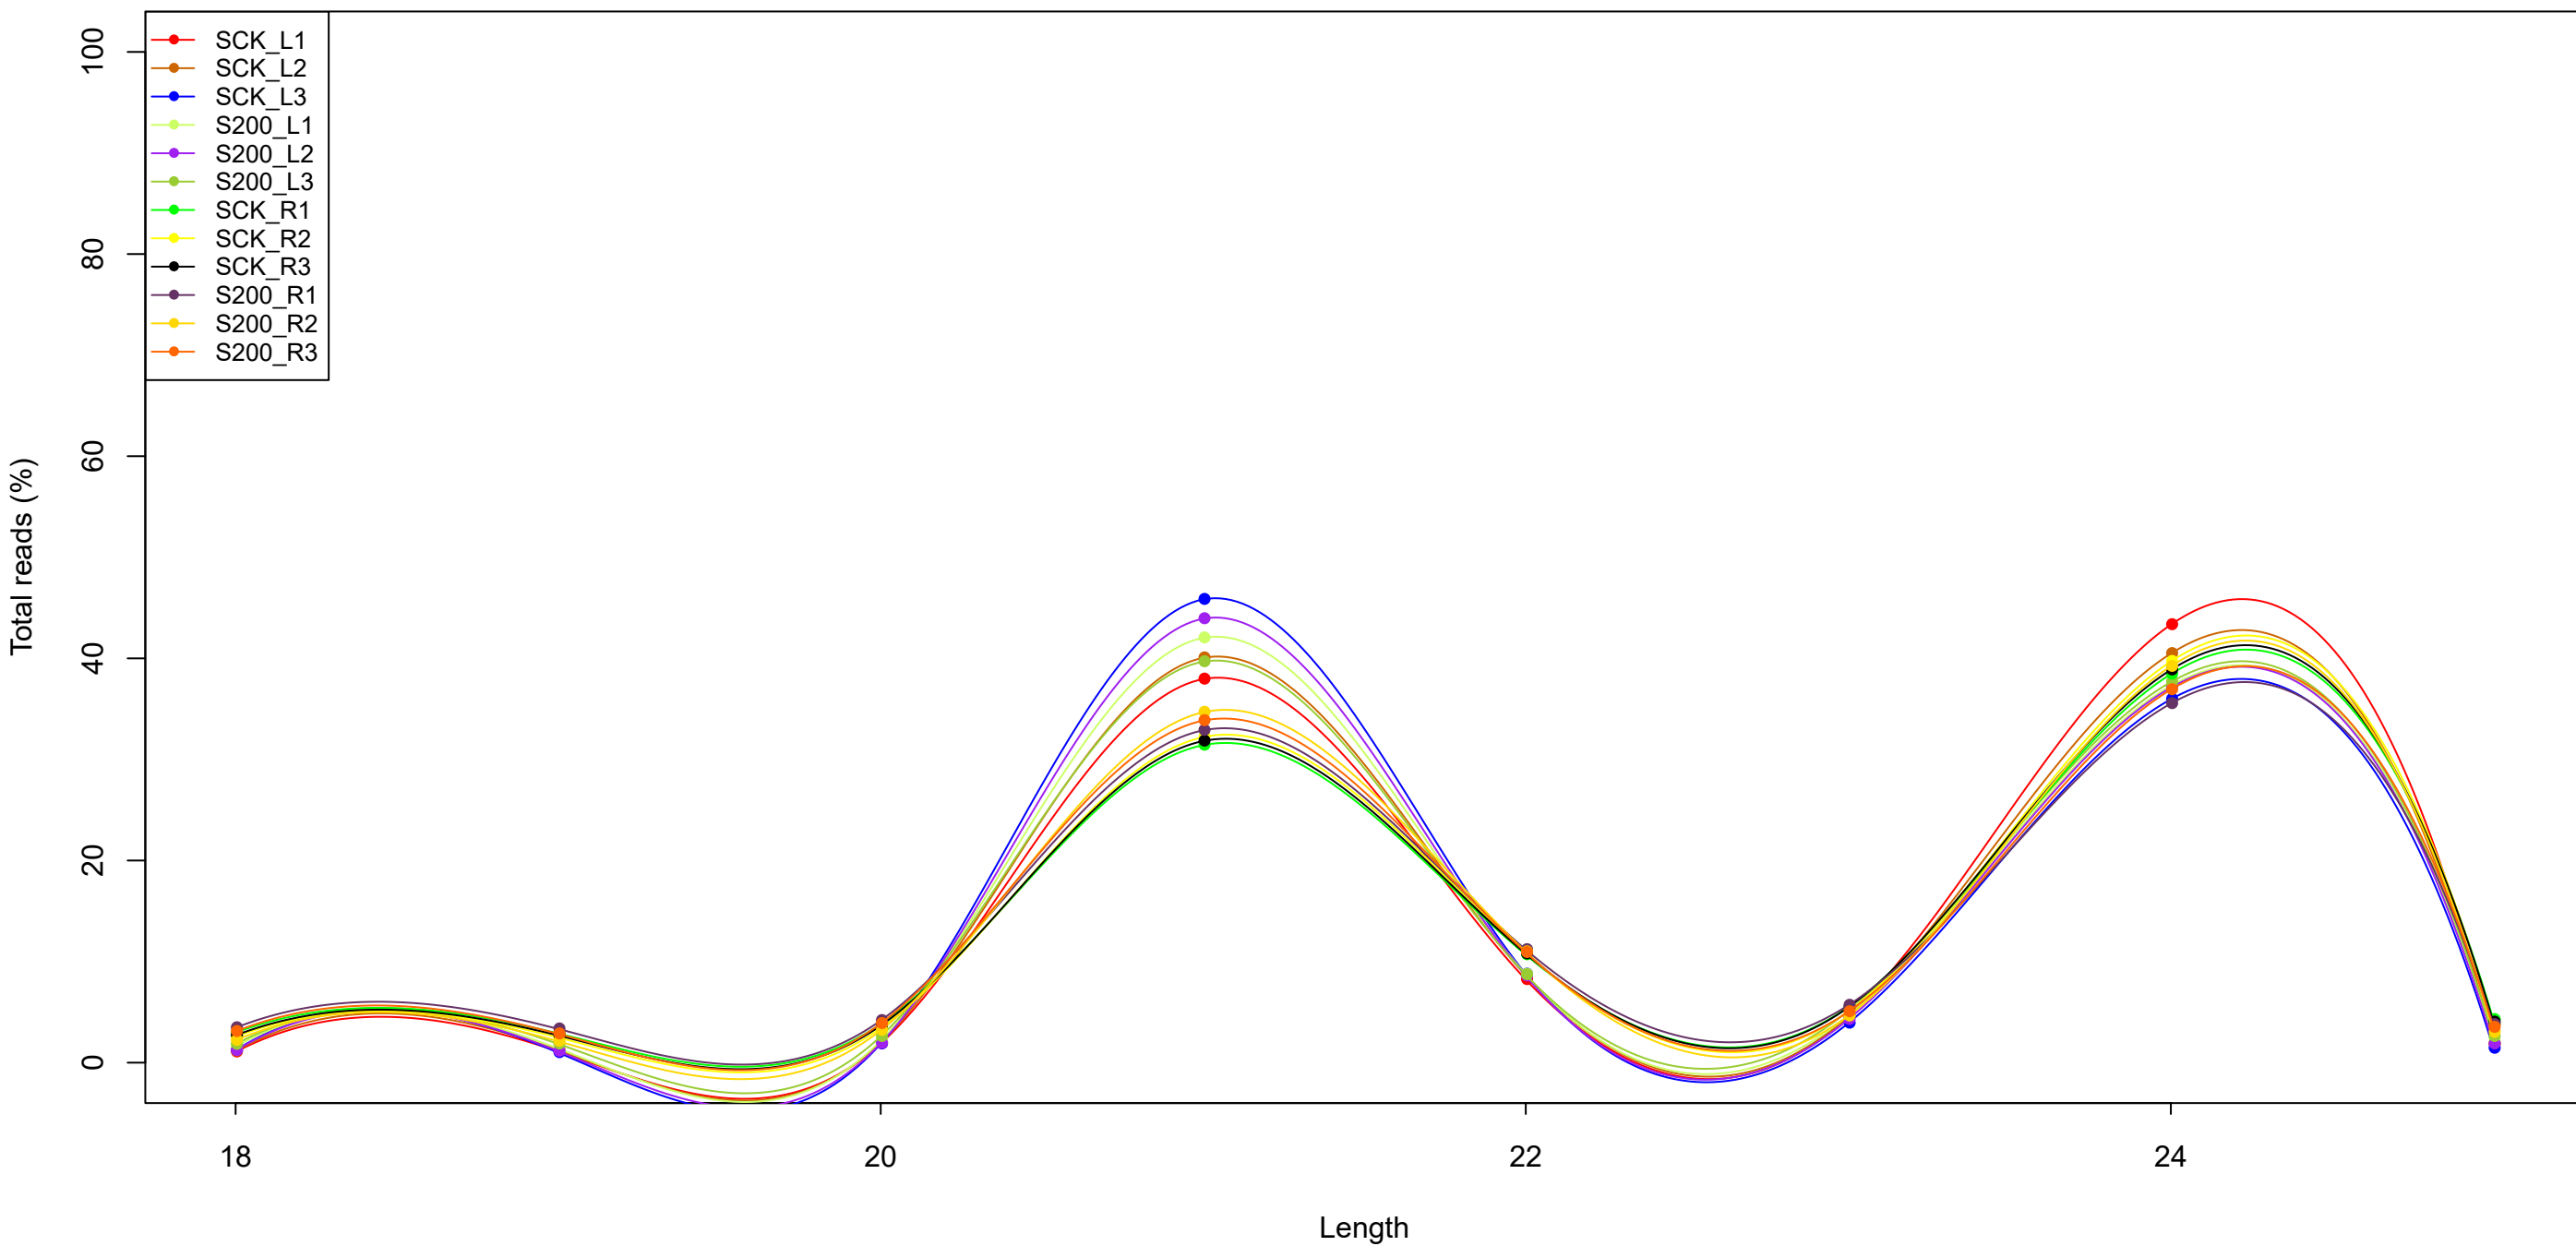

### Length distribution of sequencing result (Unique)

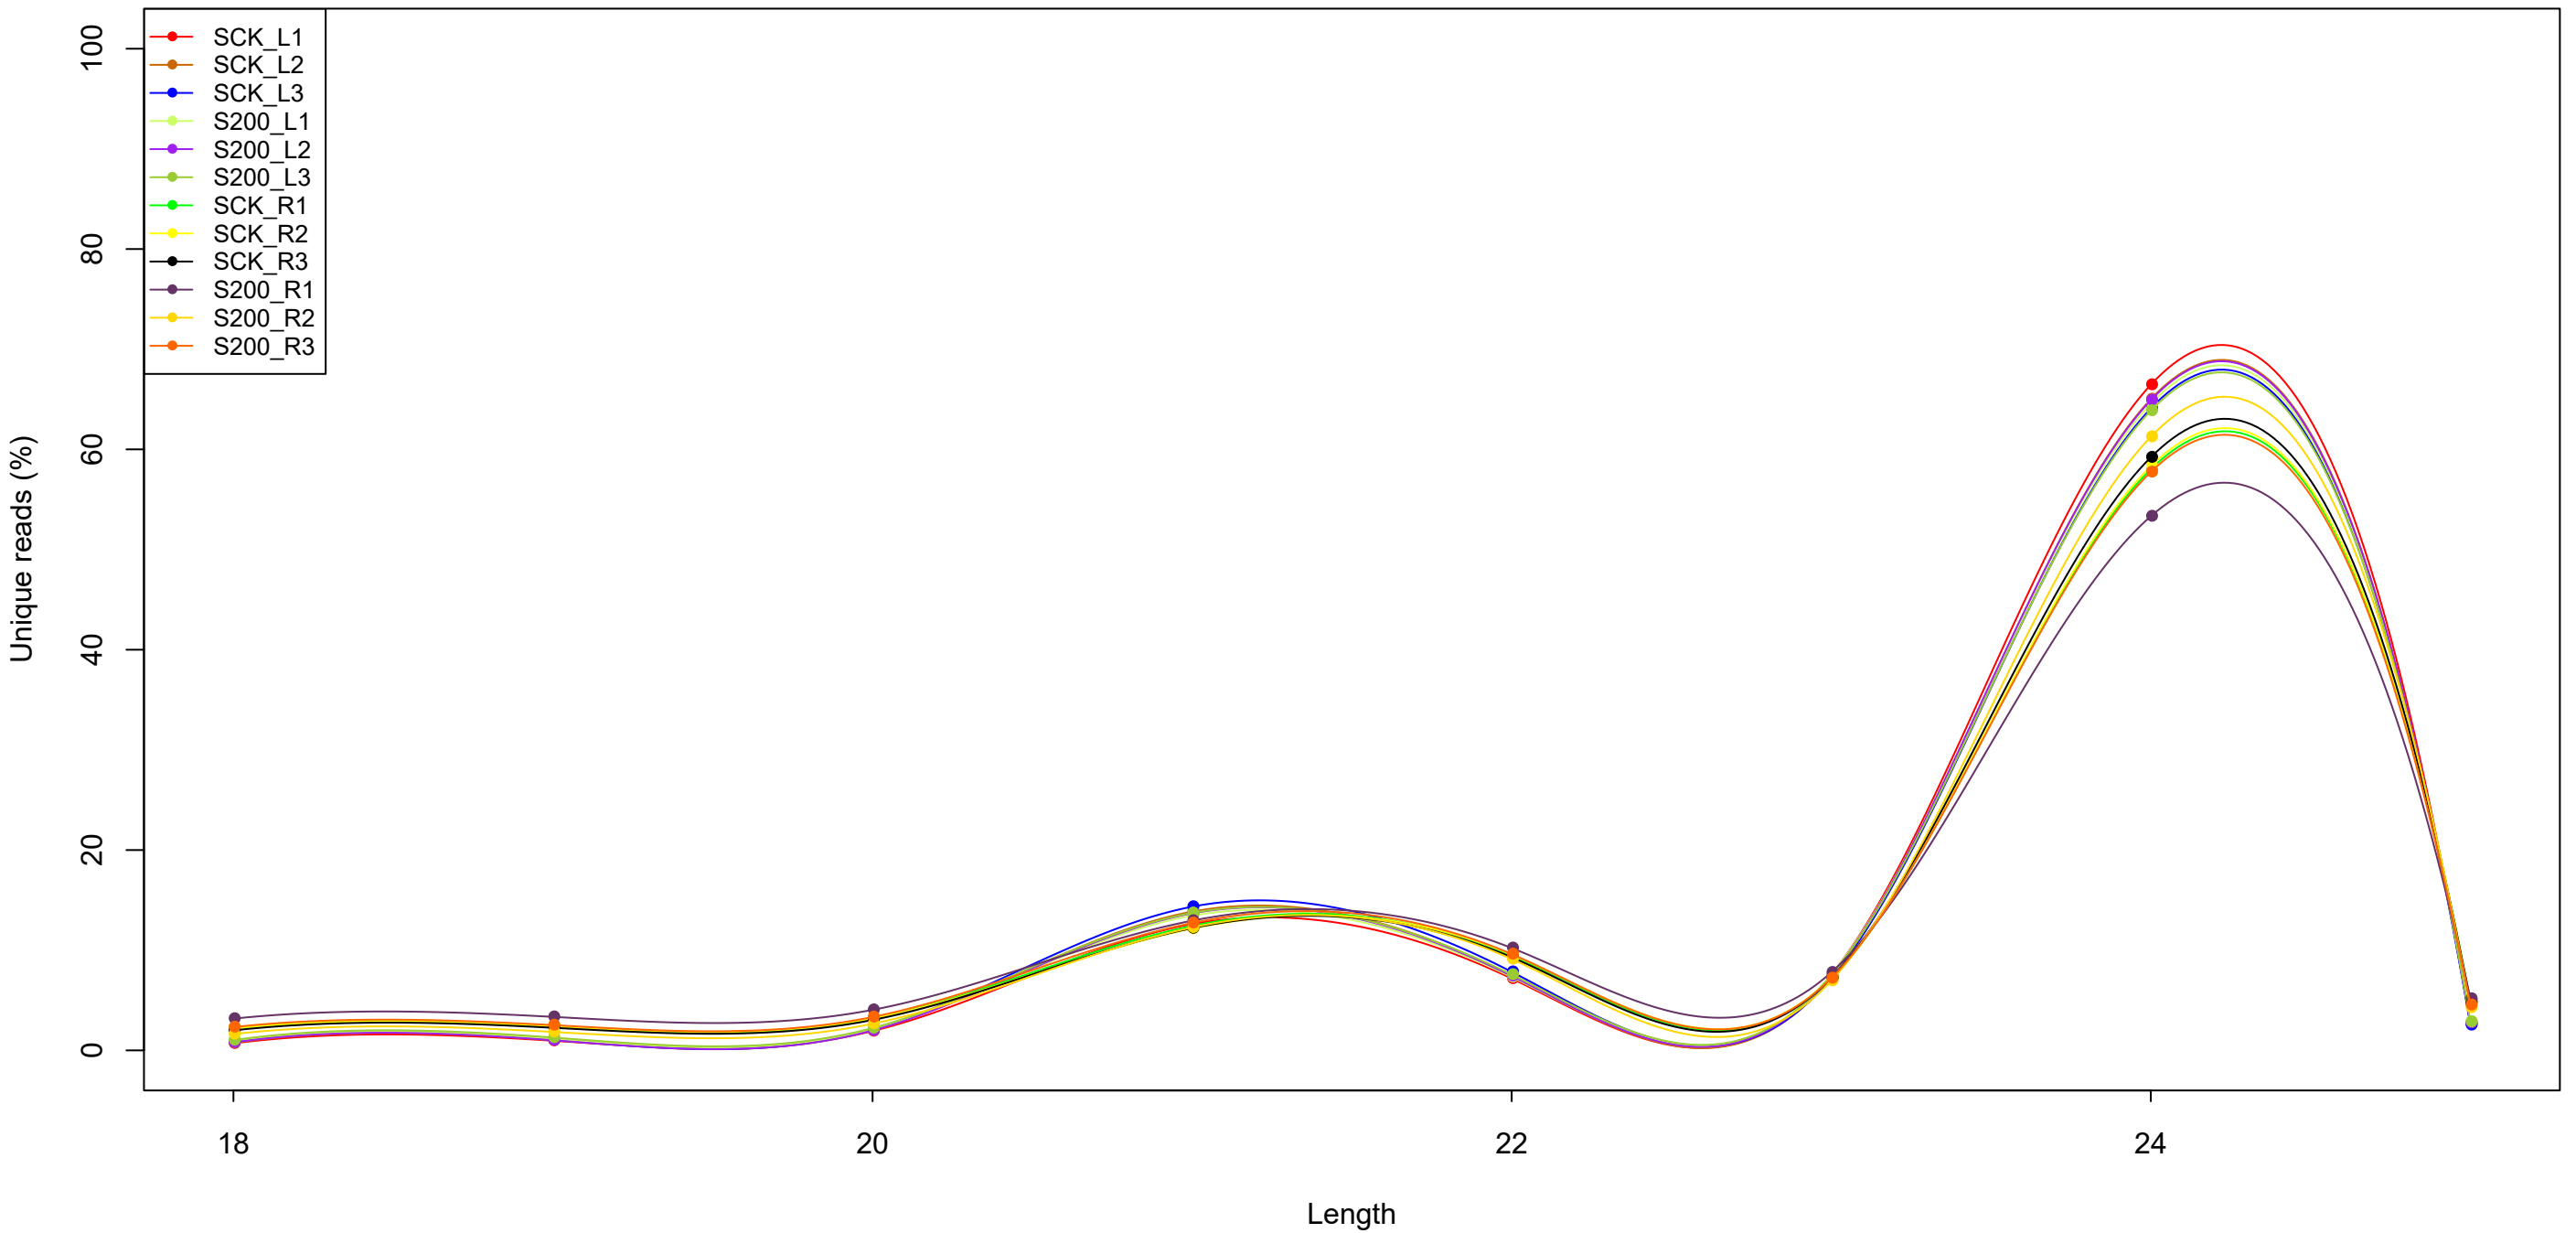

Supplement: s1 [file s1]
