# Supplementary material for: Identification of Small RNAs Associated with Salt Stress in Chrysanthemums through High-Throughput Sequencing and Bioinformatics Analysis
Source: MDPI journal article supplement (doi:10.3390/genes14030561), 2023-02-23
Supplement: s1 [file s1]

## Supplementary materials

**Table S1** Distribution of conserved miRNAs in *Chrysanthemum*

**Table S2** Novel miRNAs identified in *Chrysanthemum*

**Table S3** Degradome sequencing results of raw reads and unique mapped reads in four libraries

**Table S4** Analysis of transcripts targeted by miRNAs

**Table S5** Categories of transcripts in the roots and leaves of *Chrysanthemum*

**Table S6** GO functional annotation of target genes in *Chrysanthemum*

**Table S7** Functional analysis of target genes of miRNAs differentially expressed in roots and leaves of *Chrysanthemum* under salt stress

**Figure S1** Length distribution of sequencing (a) total miRNAs and (b) unique miRNAs

**Figure S2 (1) and Figure S2 (2)** Prediction of new miRNA stem-loop structures in *Chrysanthemum*

**Figure S3** Specific analysis of nucleotide positions

**Figure S4** The most significant functions among the top 20 GO terms in (a) roots and (b) leaves
