# Supplementary material for: Identification of Small RNAs Associated with Salt Stress in Chrysanthemums through High-Throughput Sequencing and Bioinformatics Analysis
Source: Genes (Basel). 2023 Feb 23;14(3):561. doi: 10.3390/genes14030561 (PMC10048073; doi:10.3390/genes14030561)
Supplement: Supplementary file 1 [file genes-14-00561-s001.zip]

Archive with 14 entries (14 files):
- Description of supplementary materials.pdf
- figure S1.pdf
- figure S2 (1).pdf
- figure S2 (2).pdf
- figure S3.jpg
- figure S4a.jpg
- figure S4b.jpg
- table S1.xlsx
- table S2.xlsx
- table S3.xlsx
- table S4.xlsx
- table S5.xlsx
- table S6.xlsx
- table S7.xlsx
