# Supplementary material for: Identification of Small RNAs Associated with Salt Stress in Chrysanthemums through High-Throughput Sequencing and Bioinformatics Analysis
Source: Genes (Basel). 2023 Feb 23;14(3):561. doi: 10.3390/genes14030561 (PMC10048073; doi:10.3390/genes14030561)
Supplement: Supplementary file 1 [file genes-14-00561-s001.zip › table S1.xlsx]

## Sheet: Sheet1
miR_name	miR_seq	len	type	Sequence in miRbase	SS	hairpinLen	CG%	dG	MFEI	SCK_L1(raw)	SCK_L2(raw)	SCK_L3(raw)	S200_L1(raw)	S200_L2(raw)	S200_L3(raw)	SCK_R1(raw)	SCK_R2(raw)	SCK_R3(raw)	S200_R1(raw)	S200_R2(raw)	S200_R3(raw)	SCK_L1(norm)	SCK_L2(norm)	SCK_L3(norm)	S200_L1(norm)	S200_L2(norm)	S200_L3(norm)	SCK_R1(norm)	SCK_R2(norm)	SCK_R3(norm)	S200_R1(norm)	S200_R2(norm)	S200_R3(norm)	Expression level
mtr-miR156c-3p_2ss5TC9-G	TGCTCACTGCTCTATCTGTCACC	23	3'	Diff	.((((.((((..(((...((((((((..(((..(((.((((.(((((((((((((((((((((.(((((..(((..((((..........))))..)))))))).)))))))))).)))).))))))).))))))).)))..)).))))))...))).)))).))))..	166	33.1	-63.8	1.1	643	857	4400	4087	2600	1059	138	125	215	190	131	186	590.861	945.434	3486.21	3106.87	1861.38	1376.6	216.632	152.749	203.676	274.066	86.9527	170.9	high
mtr-miR167b-5p_1ss21GA	TGAAGCTGCCAGCATGATCTA	21	5'	Diff	...((((((.(((((.((((((((((((.((.((((((((((.(((((.......(((((((.((..(....)..)))))))))....))))))))))))))))).)))))))))))).))))).)))).))...	129	41.5	-60.3	1.1	7031	5432	6987	8167	9230	4199	996	889	3008	1097	2378	2291	6460.88	5992.53	5535.94	6208.41	6607.89	5458.31	1563.52	1086.35	2849.57	1582.37	1578.42	2105	high
mtr-miR160a	TGCCTGGCTCCCTGTATGCCA	21	3'	Yes	...((((((..((..((.....(((((((((.......)))))))))...((((.......))))))..))..)).))))...	77	49.4	-31	0.8	3723.5	2333	3038	3424	4209.5	1533	510.5	693	1211	655.5	1590.5	1171.5	3421.57	2573.74	2407.07	2602.87	3013.64	1992.76	801.383	846.843	1147.22	945.529	1055.71	1076.39	high
ahy-miR159	TTTGGATTGAAGGGAGCTCTA	21	3'	Yes	.((((((((((((..(((((((..(((((((((((.((((((...(((((.(((...((((((..((.(((.((((((((((..........))))....)))))).))).))..))))))...))).)))))..))))))..))).))))))))..)))))))..))))))))))))...................	177	45.7	-85.2	0.9	54652	49650	98638.5	79857.2	105738	49489	27845	54019.5	47007.5	42406.5	64992.8	50854	50220.5	54773.4	78153.3	60706	75699.7	64331.1	43711.1	66011.6	44531.6	61169.5	43139.7	46725.4	high
cpa-miR159a	TTTGGATTGAAGGGAGCTCTA	21	3'	Yes	(((((((((..(((((((..(((((((..(((((((....((((((.(((((.((((....((.((..(((((((((((........)))).)))))))..)).))....)))).))).)))))).))..)))))..))..)))))))..)))))))..)))))))))...	168	47.4	-79	1	54652	49650	98638.5	79857.2	105738	49489	27845	54019.5	47007.5	42406.5	64992.8	50854	50220.5	54773.4	78153.3	60706	75699.7	64331.1	43711.1	66011.6	44531.6	61169.5	43139.7	46725.4	high
htu-miR162a	TCGATAAACCTCTGCATCCAG	21	3'	Yes	(((((((((((..((((((((.((((((((.(((.((((.(((((((..((((....((((....(((...(((((.........)))))....)))..))))...))))..))))))).)))).))).)))))))).))))).)))..)))))))........))))...	168	42.7	-61.9	0.8	5659	4840	4781	5120	6896	4493	534	654	1217	898	1512	1229	5200.13	5339.44	3788.08	3892.14	4936.95	5840.48	838.273	799.185	1152.9	1295.32	1003.61	1129.22	high
cca-miR164	TGGAGAAGCAGGGTACGTGCA	21	5'	Yes	...(((((((((...(((((((((((((..(....(((((....)))))..)..)))))))))))))...)))))))))....	76	47	-37.6	1	2356	1894	5548	4588	4793	1519	2870.67	3600	3766.67	2585	4932.67	3877	2164.96	2089.44	4395.79	3487.72	3431.38	1974.56	4506.37	4399.18	3568.28	3728.75	3274.11	3562.24	high
aly-miR166a-3p	TCGGACCAGGCTTCATTCCCC	21	3'	Yes	....(((((...(((((.((.((((((..(..(((..(((((((((..(((((.....(((.....))).....)))))..)))).)))))..)))..)..)))))).)).))))).....))))).....	122	41.2	-48.7	0.9	534835	419963	567707	539803	635193	435408	196394	230877	276531	194846	419802	302074	491467	463299	449805	410349	454744	565989	308299	282130	261966	281057	278648	277550	high
aly-miR166a-3p	TCGGACCAGGCTTCATTCCCC	21	3'	Yes	....(((((...(((((.((.((((((..(..(((..(((((((((..(((((.....(((.....))).....)))))..)))).)))))..)))..)..)))))).)).))))).....))))).....	122	41.2	-48.7	0.9	534835	419963	567707	539803	635193	435408	196394	230877	276531	194846	419802	302074	491467	463299	449805	410349	454744	565989	308299	282130	261966	281057	278648	277550	high
vvi-miR319b_R-1	TTGGACTGAAGGGAGCTCCC	20	3'	Diff	(((((...(((.(((((((((((((((((..((..((..((..((((((.....(((.((.(((..(((((((..((..((((((((.................))))))))..))..)))))))..))).)).))).....))))))..))..))..))..))))))))))))))))).)))))))).....	188	43.5	-86.8	1	1006	1083.5	5293	666	2554.5	554.5	3482	8260.5	3446	4959.5	13127.2	10287.5	924.427	1195.31	4193.75	506.282	1828.8	720.798	5466.04	10094.3	3264.5	7153.86	8713.36	9452.31	high
mdm-miR319a_R-1	TTGGACTGAAGGGAGCTCCC	20	3'	Diff	......((((((((..((((.(((((..((((((((((..((..((..((.((((((..(((((((.((.(((..(((((((..((....(((((((((((.......)))))))))))....))..)))))))..))).)).))).)))).))))))))..))..))..))))))))))..))))).)))).))))))))......	195	41.1	-89.7	1.1	1006	1083.5	5293	666	2554.5	554.5	3482	8260.5	3446	4959.5	13127.2	10287.5	924.427	1195.31	4193.75	506.282	1828.8	720.798	5466.04	10094.3	3264.5	7153.86	8713.36	9452.31	high
bna-miR394a_1ss20CT	TTGGCATTCTGTCCACCTCT	20	5'	Diff	(((((..(((((((((...(((((((((((((...(((((((.((((((((....))))))))......))))))).....)))))))))))))...)))))).)))..)))))..	114	41.4	-49	1	1115	950	2459	817	1443	448	3093	7708	3338	4456	13123	11721	1024.59	1048.03	1948.32	621.069	1033.06	582.358	4855.39	9419.14	3162.19	6427.58	8710.54	10769.4	high
ptc-miR396f	TTCCACGGCTTTCTTGAACTG	21	5'	Yes	....((((((((.((.((((((((((((((((.........((((..((((((.((....((((((....)))))))))))))).))))........)))))))))))))))).)).))))))))..	121	34.6	-42.7	1	124880	121029	197287	166824	209485	107534	79742.7	104594	128591	94317	192968	163662	114753	133518	156314	126817	149974	139783	125180	127813	121818	136048	128085	150376	high
csi-miR396a-5p	TTCCACAGCTTTCTTGAACTG	21	5'	Yes	.((..((((((((.(((...((((((((((((((((((.(((.(((......(((........))).....((.....)).))).))).))))))))))))))))))...))).))))))))....)).......(((((......)))))..	127	39.9	-53.4	0.9	5982.5	5575	7932.17	6313	7720.83	3761.5	2943.67	4682.5	3484.67	4602	8278.17	9244	5497.4	6150.28	6284.82	4799.03	5527.46	4889.6	4620.97	5721.99	3301.13	6638.18	5494.73	8493.52	high
csi-miR396f-5p	TTCCACAGCTTTCTTGAACTT	21	5'	Yes	(((.(((((((((((.((((((((((((((...............................................................(((((((......)))))))(((....)))...)))))))))))))).))))))))))).))).....	156	35.4	-45	0.8	31196.2	28176.7	37601.7	32896.3	46553.2	19850	695.833	933.667	1594.5	931.333	1880.33	1662.17	28666.6	31084.2	29792.6	25007.2	33328.1	25803.1	1092.32	1140.94	1510.52	1343.41	1248.09	1527.22	high
lus-miR408a_L-1R+1	TGCACTGCCTCTTCCCTGGCC	21	3'	Diff	((((((((..((((((...((((......((((((..(((...((((((((((((((.((.(((.((((((..((...(((...((((((....))))))..)))..))..)))))).))).)).))))).)))))))))...)))..))))))..))))))))))..))))))))	176	45.5	-62.8	0.8	314.4	256.1	2122.18	43.2	444.4	723.567	4996.9	4520.95	3168.18	2487.38	6860.47	5984.02	288.906	282.527	1681.45	32.8399	318.152	940.569	7844.13	5524.58	3001.31	3587.94	4553.71	5498.2	high
mes-miR477a_L+1	CCTCTCCCTCAAGGGCTTCTG	21	5'	Diff	.((((((((..(((((((((.(((..((((....))))..)))..)))))))))...))))))))...	64	52.9	-32	0.9	924	1170.5	978.5	936	1929	894	5484	11006.5	2746	5490	18436.5	10705	849.076	1291.28	775.285	711.531	1381	1162.12	8608.78	13449.9	2601.37	7919.08	12237.4	9835.91	high
mtr-miR156b-5p	TGACAGAAGAGAGTGAGCAC	20	5'	Yes	.((((.((((..(((...((((((((..(((..(((.((((.(((((((((((((((((((((.(((((..(((..((((..........))))..)))))))).)))))))))).)))).))))))).))))))).)))..)).))))))...))).)))).))))..	166	33.1	-63.8	1.1	721	888	3307	3016	2374	890	712	977	1787	816	1646	1450	662.537	979.633	2620.2	2292.71	1699.58	1156.92	1117.7	1193.89	1692.88	1177.04	1092.55	1332.28	middle
aly-miR167d-3p_2ss9CT20GA	AGGTCATCTTGCAGCTTCAAT	21	3'	Diff	...((((((.(((((.((((((((((((.((.((((((((((.(((((.......(((((((.((..(....)..)))))))))....))))))))))))))))).)))))))))))).))))).)))).))...	129	41.5	-60.3	1.1	2045	1725	245	741	857	1863	39	40	90	60	72	67	1879.18	1903	194.118	563.295	613.539	2421.73	61.2222	48.8798	85.2597	86.5473	47.7908	61.5606	middle
gma-miR395a_1ss19CT	CTGAAGTGTTTGGGGGAATTC	21	3'	Diff	...((((.((..(((.((((((((((((((((...((........))..........((((((((............)))))))).)))))))))))))))).)))..)).))))...	112	38.1	-38.6	0.9	0	6	0	7	6	0	10	26	9	16	58	53	0	6.61914	0	5.32128	4.29549	0	15.698	31.7719	8.52597	23.0793	38.4982	48.6972	middle
mtr-miR398a-5p_2ss12GC21AT	GGAGTGACACTCAGAACACATG	22	5'	Diff	...(((((...(((....(((.(((((.((.(((((((((((..((((((..(((.....((.......))....))).))))))..))))))))))).))))))).)))..)))..)))))...	119	45.6	-47.6	0.8	0	0	0	0	0	0	20	13	23	0	6	6	0	0	0	0	0	0	31.396	15.8859	21.7886	0	3.98257	5.51289	middle
mtr-miR398a-3p_1ss21TC	TGTGTTCTCAGGTCACCCCTC	21	3'	Diff	...(((((...(((....(((.(((((.((.(((((((((((..((((((..(((.....((.......))....))).))))))..))))))))))).))))))).)))..)))..)))))...	119	45.6	-47.6	0.8	525	341	325	80	170	234	1364	1664	2419	146	1760	1699	482.43	376.188	257.504	60.8146	121.705	304.178	2141.21	2033.4	2291.59	210.598	1168.22	1561.07	middle
mtr-miR156e_L-1	TGACAGAAGATAGAGAGCAC	20	5'	Diff	................(((...((((......)))).)))...	24	53.5	-6.9	0.3	0	0	12.5	10.5	3	0	8	11	9.5	4	14.5	6	0	0	9.904	7.98192	2.14774	0	12.5584	13.4419	8.99963	5.76982	9.62454	5.51289	middle
mtr-miR156e	TTGACAGAAGATAGAGAGCAC	21	3'	Yes	...(((...(((..(((..(..(((..........)))..).....)))..)))...)))...	57	50.8	-9.7	0.3	155	180	425.5	512.5	351	132	460	423	814.5	309	726	612	142.432	198.574	337.132	389.594	251.286	171.588	722.108	516.904	771.6	445.719	481.891	562.315	middle
mtr-miR160a_R-1_1ss20CT	TGCCTGGCTCCCTGTATGCT	20	3'	Diff	(((..(....(..(((((....(..(((...........(((((((..........)))))))..(((...((((..((...))..))))............((((((.....))))))......))).)))..)....)))))..)......)..)))..	159	39.8	-35.8	0.6	8	10	23	27	17.5	8.5	7.5	4.5	4	7.5	9.5	5	7.35131	11.0319	18.2234	20.5249	12.5285	11.0492	11.7735	5.49898	3.78932	10.8184	6.30573	4.59407	middle
mtr-miR160a_1ss21AT	TGCCTGGCTCCCTGTATGCCT	21	5'	Diff	...(((..(((((..((((((.((.((((((...........((((((((((....((((.......))))...(((...)))..))))))))))..........((((((....)))))))))))).))..))))))..)).)))))).	146	51.3	-50.7	0.7	169.5	126	287	284	240	128.5	79	67.5	75	74	153	174.5	155.756	139.002	227.396	215.892	171.819	167.038	124.014	82.4847	71.0497	106.742	101.555	160.333	middle
mtr-miR166a_R-2	TCGGACCAGGCTTCATTCC	19	5'	Diff	.......((((.((((((..((((..(((((.((.((....)).)).)))))..))))..))).))).).)))...	66	52.6	-19.3	0.5	554.5	476.5	505	497.5	554	467.5	123.5	139.5	173	155	315	223.5	509.538	525.67	400.122	378.191	396.617	607.706	193.87	170.468	163.888	223.581	209.085	205.355	middle
mtr-miR166a_R-2	TCGGACCAGGCTTCATTCC	19	5'	Diff	..........((((......))))..(((((.((.((....)).)).)))))	14	61.5	-11.7	0.4	554.5	476.5	505	497.5	554	467.5	123.5	139.5	173	155	315	223.5	509.538	525.67	400.122	378.191	396.617	607.706	193.87	170.468	163.888	223.581	209.085	205.355	middle
mtr-miR171d	TGATTGAGCCGTGCCAATATC	21	5'	Yes	.......(((((((.(((....)))))))).))...	26	50	-9.4	0.5	327.5	162.5	141.5	127.5	235.5	148	92	136.5	111.5	139.5	193	153.5	300.944	179.268	112.113	96.9233	168.598	192.386	144.422	166.802	105.627	201.223	128.106	141.038	middle
gma-miR171c-3p_2ss9TC21AT	TTGAGCCGCGCCAATATCACT	21	3'	Diff	((((((.((..(((.....)))..))..))))))...............	34	49	-10.2	0.4	424	223	233	168	370.5	181	325	666	305.5	688.5	710.5	617	389.619	246.011	184.611	127.711	265.246	235.283	510.185	813.849	289.409	993.13	471.602	566.909	middle
gma-miR171k-3p	TTGAGCCGCGCCAATATCACT	21	5'	Yes	...((((..(((..(((((((...........))))).))....)))..))))...	50	53.6	-17.1	0.6	424	223	233	168	370.5	181	325	666	305.5	688.5	710.5	617	389.619	246.011	184.611	127.711	265.246	235.283	510.185	813.849	289.409	993.13	471.602	566.909	middle
mtr-miR390	AAGCTCAGGAGGGATAGCGCC	21	5'	Yes	.((((((.(((((((((((((.((......))....)))))).....)).))))).)))))).	61	42.9	-14.2	0.5	683	595	128	372	327	411	1319	2194	1802	1099	3341	2745	627.618	656.398	101.417	282.788	234.104	534.262	2070.57	2681.06	1707.09	1585.26	2217.63	2522.15	middle
gma-miR394a-5p	TTGGCATTCTGTCCACCTCC	20	3'	Yes	...(((((.....))))).....	15	43.5	-3.4	0.3	2623	2012	2334.5	1992.5	2707.5	1180	618	1166.5	701	819.5	2328	1941	2410.31	2219.62	1849.67	1514.66	1938.34	1533.89	970.136	1425.46	664.078	1182.09	1545.24	1783.42	middle
gma-miR394a-5p	TTGGCATTCTGTCCACCTCC	20	3'	Yes	...(((((.....))))).....	15	47.8	-3.4	0.3	2623	2012	2334.5	1992.5	2707.5	1180	618	1166.5	701	819.5	2328	1941	2410.31	2219.62	1849.67	1514.66	1938.34	1533.89	970.136	1425.46	664.078	1182.09	1545.24	1783.42	middle
mtr-miR397-5p	TCATTGAGTGCAGCGTTGATG	21	3'	Yes	.(.(((((.((.(((((((...)))))))..)).)))))).......	39	44.7	-10.9	0.5	0	0	14	0	0	0	68	54	114	53	70	69	0	0	11.0925	0	0	0	106.746	65.9877	107.996	76.4501	46.4633	63.3982	middle
lja-miR477-5p_R-1_2ss1AT21GT	TCTCTCCCTCAAGGGCTTCTT	21	5'	Diff	...(((....((((.......((((....))))..))))....)))...	43	46.9	-10.7	0.5	0	0	5	0	6	0	10.5	52.5	0	24	52	39	0	0	3.9616	0	4.29549	0	16.4829	64.1547	0	34.6189	34.5156	35.8338	middle
gma-miR482b-3p_R-1_2ss9AG20AC	TCTTCCCTGCACCTCCCATCC	21	5'	Diff	.......((((.........................))))...	33	60.5	-2	0.1	24	22	43	25	56	11	5	5	0	0	23	0	22.0539	24.2702	34.0698	19.0046	40.0912	14.299	7.849	6.10998	0	0	15.2665	0	middle
ath-miR858a_L-1R-1	TTCGTTGTCTGTTCGACCT	19	5'	Diff	...(((.(((..((..(((((.((((..((((((...)))))).)))).)............((((((...((....))...))))))......))))))..))))))...	105	39.6	-16.7	0.4	21	7	21	8	10	14	19	22	25	28	30	37	19.2972	7.72233	16.6387	6.08146	7.15914	18.1987	29.8262	26.8839	23.6832	40.3887	19.9128	33.9961	middle
mtr-miR2111a-5p_1ss21AT	TAATCTGCATCCTGAGGTTTT	21	5'	Diff	.............(((((..(((..((((((((((........))))..).)))))..)))..)))))...	55	42.3	-16.7	0.6	7	7	6	6	14	12	28	21	69	35	97	68	6.4324	7.72233	4.75392	4.5611	10.0228	15.5989	43.9544	25.6619	65.3657	50.4859	64.3848	62.4794	middle
vvi-miR3630-3p_L-2R-1_1ss14CT	TGGGAATCTCTTTGATGCA	19	3'	Diff	...((((((..(((((((..((((((.....))))))......((((..(((.........)))))))...)))))))....))))))...	85	36.3	-21.9	0.7	16	0	0	0	10	6	10	0	18	14	29	7	14.7026	0	0	0	7.15914	7.79944	15.698	0	17.0519	20.1944	19.2491	6.4317	middle
rgl-miR5138_L-1R+7	AAAATCGTTAGGCGCTAGTGAGGC	24	5'	Diff	.......(((((((.(((.(((.....)))..))).)))))))...	36	56.5	-16.8	0.6	19	7.5	16	23	13.5	3.5	9	6.5	6.5	11.5	14	15	17.4594	8.27393	12.6771	17.4842	9.66484	4.54967	14.1282	7.94297	6.15764	16.5882	9.29266	13.7822	middle
rgl-miR5138_L-1R+7	AAAATCGTTAGGCGCTAGTGAGGC	24	5'	Diff	....(((((((((((.(((.(((.....)))..))).)))))))))))...	44	47.1	-18.7	0.8	19	7.5	16	23	13.5	3.5	9	6.5	6.5	11.5	14	15	17.4594	8.27393	12.6771	17.4842	9.66484	4.54967	14.1282	7.94297	6.15764	16.5882	9.29266	13.7822	middle
cas-miR5139_L-1_1ss8GT	AACCTGTCTCTGATACCA	18	3'	Diff	...(((((((((((.....))))).))))))...	28	41.2	-11.5	0.8	3.5	2.5	19.5	11	5.5	5	0	0	4.5	0	4	6	3.2162	2.75798	15.4502	8.36201	3.93753	6.49953	0	0	4.26298	0	2.65505	5.51289	middle
cas-miR5139_L-1_1ss8GT	AACCTGTCTCTGATACCA	18	5'	Diff	...........((((....((((........))))...))))...	31	35.6	-3.7	0.2	3.5	2.5	19.5	11	5.5	5	0	0	4.5	0	4	6	3.2162	2.75798	15.4502	8.36201	3.93753	6.49953	0	0	4.26298	0	2.65505	5.51289	middle
cca-miR6111-5p_1ss5TG	TCTTGATGTCACGATGTATGAC	22	5'	Diff	..((((((((.(((...(((((.....)))))..........(((((((....)))))))........((((.......))))....))).))))))))........	97	35.5	-22	0.6	6	6	4	2.5	0	0	2.5	3	12.5	8.5	10.5	7	5.51348	6.61914	3.16928	1.90046	0	0	3.9245	3.66599	11.8416	12.2609	6.96949	6.4317	middle
cca-miR6111-5p_1ss5TG	TCTTGATGTCACGATGTATGAC	22	5'	Diff	...((((((((.......))))))))...	23	34.5	-8.9	0.9	6	6	4	2.5	0	0	2.5	3	12.5	8.5	10.5	7	5.51348	6.61914	3.16928	1.90046	0	0	3.9245	3.66599	11.8416	12.2609	6.96949	6.4317	middle
cca-miR6111-5p	TCTTTATGTCACGATGTATGAC	22	5'	Yes	........((((......(((((.....)))))))))......(((((((....)))))))........	29	34.8	-11.1	0.5	230.5	315	309.5	435	360	146.5	189.5	207.5	391	214	404.5	327.5	211.81	347.505	245.223	330.679	257.729	190.436	297.477	253.564	370.406	308.685	268.491	300.912	middle
cca-miR6111-5p	TCTTTATGTCACGATGTATGAC	22	3'	Yes	...(((((((..(((((((((.....((((((......))))))....(((((((...(((......))))))))))..))))))).))..)))).)))...	96	37.3	-28	0.7	230.5	315	309.5	435	360	146.5	189.5	207.5	391	214	404.5	327.5	211.81	347.505	245.223	330.679	257.729	190.436	297.477	253.564	370.406	308.685	268.491	300.912	middle
cca-miR6111-5p_R-2_1ss20GT	TCTTTATGTCACGATGTATT	20	5'	Diff	.........(((((...((((((.......)))))))))))...	32	31.8	-10.7	0.8	11.5	14.5	21.5	25.5	14	8	3.5	7.5	12	14.5	22	19.5	10.5675	15.9963	17.0349	19.3847	10.0228	10.3993	5.4943	9.16496	11.368	20.9156	14.6027	17.9169	middle
cca-miR6111-5p_R-2_1ss20GT	TCTTTATGTCACGATGTATT	20	3'	Diff	((.((((((((((((.....))))).............))))))).))...	48	41.2	-10.8	0.5	11.5	14.5	21.5	25.5	14	8	3.5	7.5	12	14.5	22	19.5	10.5675	15.9963	17.0349	19.3847	10.0228	10.3993	5.4943	9.16496	11.368	20.9156	14.6027	17.9169	middle
cca-miR6114-3p_L+1R-1_2	TTCACGTCCATTGTCCCTTTC	21	5'	Diff	...(((((.((((((((.........((((.............(((.(((((......))))).)))......((((((.....)))))).............))))........)))))))))))))...	125	37.4	-22.5	0.5	1246	1073	1797	1823	1962	1163	456	841	888.5	756.5	1231	913	1144.97	1183.72	1423.8	1385.81	1404.62	1511.79	715.828	1027.7	841.702	1091.22	817.09	838.878	middle
cca-miR6114-3p_L+1R-1_1ss8CT	TTCACGTTCATTGTCCCTTTC	21	3'	Diff	...(((((((((((..(((((........(((((((((((.....)))).))))))).....))))))))))))))))...	75	34.6	-25	0.9	23	16	33	30	34	11	4	17	11.5	9.5	24	32	21.135	17.651	26.1466	22.8055	24.3411	14.299	6.2792	20.7739	10.8943	13.7033	15.9303	29.4021	middle
ath-miR8175_L-2	TCCCCGGCAACGGCGCCA	18	5'	Diff	.......(((((((.(((...........))))))))))...	32	61.9	-12.1	0.5	15	11.5	24	11	19.5	13	9	22.5	19	35.5	19.5	32	13.7837	12.6867	19.0157	8.36201	13.9603	16.8988	14.1282	27.4949	17.9993	51.2072	12.9433	29.4021	middle
ath-miR8175_L-2	TCCCCGGCAACGGCGCCA	18	5'	Diff	...((((((.(((......)))....((((((((.....(((((.((...(((..((((((...((((..((....))..))))....)))))).)))......)).))))).))))))))..............)).)))).	139	50.3	-39.7	0.6	15	11.5	24	11	19.5	13	9	22.5	19	35.5	19.5	32	13.7837	12.6867	19.0157	8.36201	13.9603	16.8988	14.1282	27.4949	17.9993	51.2072	12.9433	29.4021	middle
ath-miR8175_L-2_1ss12AG	TCCCCGGCAGCGGCGCCA	18	3'	Diff	...(((.((...((.....))..)).)))...	26	71.9	-6.7	0.3	8	10.5	10	14	11	5	8	11	14	12.5	17	11.5	7.35131	11.5835	7.9232	10.6426	7.87506	6.49953	12.5584	13.4419	13.2626	18.0307	11.2839	10.5664	middle
cas-miR11592_L+4R+1	AACCGAACCGAACCGAACCGAAAC	24	5'	Diff	...(((((...((.((.....(((((((.....(((((((((...............(((.....)))..(((((((.....)))))))......)))))))))....))))))).....)).))....)))))...	131	35.8	-31.6	0.6	5	12	0	6	6	9	6	0	9	15	10	9	4.59457	13.2383	0	4.5611	4.29549	11.6992	9.4188	0	8.52597	21.6368	6.63761	8.26933	middle
cca-miR156b_R+1_2ss20TC21AT	TGACAGAAGAGAGTGAGCACTT	22	5'	Diff	.....((((((((((((((((((((((((((((.(((((.(((((((....))))))).))))).......)))))))))))))).))))).))))))))).	96	41.2	-54.1	1.3	62	61	192	178	141	40	13	21	56	16	23	33	56.9726	67.2946	152.125	135.313	100.944	51.9963	20.4074	25.6619	53.0505	23.0793	15.2665	30.3209	middle
mtr-miR156i-3p_2ss15TG22TA	TGCTCACTTCTCTTGCTGTCAAC	23	3'	Diff	.....((((((((((((((((((((((((((((.(((((.(((((((....))))))).))))).......)))))))))))))).))))).))))))))).	96	41.2	-54.1	1.3	948	947	2751	1960	2006	1321	340	531	800	504	645	686	871.13	1044.72	2179.67	1489.96	1436.12	1717.18	533.732	648.879	757.864	726.997	428.126	630.307	middle
cca-miR156c_R+1	TTGACAGAAGATAGAGAGCACA	22	5'	Diff	((....((((((((((((((((((((..(((((...(((.((((((.......)))))).))))))))..))))))))))).)))))))))....)).	97	40.8	-47.2	1.2	2.5	0	24.75	14.25	10.25	3.25	9.75	7.5	23.75	11.75	16.25	22	2.29728	0	19.6099	10.8326	7.33812	4.2247	15.3055	9.16496	22.4991	16.9488	10.7861	20.2139	middle
mtr-miR156h-3p_L+1_2ss11TC22CT	TGCTCTTTATCCTTCTGTCATT	22	3'	Diff	((....((((((((((((((((((((..(((((...(((.((((((.......)))))).))))))))..))))))))))).)))))))))....)).	97	40.8	-47.2	1.2	24	27	58	62	48	14	30	23	56	31	33	49	22.0539	29.7861	45.9546	47.1313	34.3639	18.1987	47.094	28.1059	53.0505	44.7161	21.9041	45.0219	middle
gma-miR156aa_R+2_1ss6AG	ATTGGGGTGAAGGGAGCTCC	20	3'	Diff	..((((...((((((((((((.((((((((..((.(((((((.....(((((((.((..((.((((..((((...(((..(((((((..(((.......))).)))))))..)))...))))..)))).))..)))))))))...)))))))))..)))))))).)))))))))))).))))....	180	45.7	-83.8	1	0	0	0	0	0	0	80	51	226.5	140.5	134	186.5	0	0	0	0	0	0	125.584	62.3218	214.57	202.665	88.944	171.359	middle
stu-miR156a_R+1	TTGACAGAAGATAGAGAGCACA	22	5'	Diff	.((((((((((((((((((((.((((((((.(((((................))))).)))..))))).))))))))))).)))))))))...	89	36.6	-43	1.3	2.5	0	24.75	14.25	10.25	3.25	9.75	7.5	23.75	11.75	16.25	22	2.29728	0	19.6099	10.8326	7.33812	4.2247	15.3055	9.16496	22.4991	16.9488	10.7861	20.2139	middle
ath-miR157a-5p_R+1	TTGACAGAAGATAGAGAGCACC	22	5'	Diff	(((.(.((((((((((((((((((((.((((((((.(((((.((...(((((((((....((((.(((.....))))))).....))))))))).....(((......)))...............................)).))))).)))))))).))))))))))).)))))))))).)))	186	38.7	-64.7	0.9	0	0	13.75	8.25	3.75	3.25	4.25	3	7.75	5.25	7.75	6.5	0	0	10.8944	6.27151	2.68468	4.2247	6.67165	3.66599	7.34181	7.57289	5.14415	5.9723	middle
gma-miR159a-5p_L+1_2ss20TA21TA	AGAGCTCCTTGAAGTCCAAAAG	22	5'	Diff	.((((((((((((..(((((((..(((((((((((.((((((...(((((.(((...((((((..((.(((.((((((((((..........))))....)))))).))).))..))))))...))).)))))..))))))..))).))))))))..)))))))..))))))))))))...................	177	45.7	-85.2	0.9	110	91	43	61	52	56	16	31	36	32	56	32	101.08	100.39	34.0698	46.3711	37.2276	72.7948	25.1168	37.8819	34.1039	46.1586	37.1706	29.4021	middle
csi-miR159b-5p_1ss20CT	AGCTGCCGACTCATTCATTTA	21	5'	Diff	((((((..((..((..(((.((((((....((((.((.(((..(((((((..((..((((((((...((..(((......))).))))))))))..))..)))))))..))).)).))))....)))))))))..))..))..)))))).	149	42	-54.4	0.9	0	4.33333	2.33333	3	3.66667	2.33333	8.33333	19.3333	3	4.66667	20.6667	9	0	4.78049	1.84875	2.28055	2.62502	3.03311	13.0817	23.6252	2.84199	6.73146	13.7177	8.26933	middle
ptc-miR159e_R-1_1ss1CA	ATTGGGGTGAAGGGAGCTCC	20	3'	Diff	........(((((((((..((((((((((..(..((((((......(((.((((((.(((.(((...((((...((((...((..(((((((.((....))..)).)))))..))..))))...))))...))).))).)))))).)))...))))))..)..)))))))).))..))))))))).......	177	51	-83.8	0.9	0	0	0	0	0	0	80	51	226.5	140.5	134	186.5	0	0	0	0	0	0	125.584	62.3218	214.57	202.665	88.944	171.359	middle
ath-miR162a-5p_L-1_2ss5GT6GA	GGATACAGCGGTTCATCGATC	21	5'	Diff	(((((((((((..((((((((.((((((((.(((.((((.(((((((..((((....((((....(((...(((((.........)))))....)))..))))...))))..))))))).)))).))).)))))))).))))).)))..)))))))........))))...	168	42.7	-61.9	0.8	13	8	16	14	23	0	13	21	18	10	21	15	11.9459	8.82552	12.6771	10.6426	16.466	0	20.4074	25.6619	17.0519	14.4246	13.939	13.7822	middle
aly-miR166g-5p	GGAATGTTGTTTGGCTCGAGG	21	5'	Yes	....(((((...(((((.((.((((((..(..(((..(((((((((..(((((.....(((.....))).....)))))..)))).)))))..)))..)..)))))).)).))))).....))))).....	122	41.2	-48.7	0.9	762	523	709.75	893.75	894	420	276	286	369.5	360.75	516.25	428.25	700.212	576.968	562.349	679.413	640.028	545.961	433.265	349.491	350.038	520.366	342.667	393.482	middle
aly-miR166g-5p	GGAATGTTGTTTGGCTCGAGG	21	5'	Yes	....(((((...(((((.((.((((((..(..(((..(((((((((..(((((.....(((.....))).....)))))..)))).)))))..)))..)..)))))).)).))))).....))))).....	122	41.2	-48.7	0.9	762	523	709.75	893.75	894	420	276	286	369.5	360.75	516.25	428.25	700.212	576.968	562.349	679.413	640.028	545.961	433.265	349.491	350.038	520.366	342.667	393.482	middle
ptc-miR166p_1ss21TC	TCGGACCAGGCTCCATTCCTC	21	3'	Diff	...(((((..(((((....((((((..(((((((((..(((((((............))))).(((((((.........)))))))((((..(....)..))))..))..))))).))))..))))))....)))))..)))))..	141	46.6	-51.6	0.8	43	27.5	34	34	42.5	24	9	14	21.5	9.5	116	42	39.5133	30.3377	26.9389	25.8462	30.4264	31.1978	14.1282	17.1079	20.3676	13.7033	76.9963	38.5902	middle
aly-miR167a-5p_R+1	TGAAGCTGCCAGCATGATCTAA	22	5'	Diff	(((((..(((((.....(((((((((.((((((((((((((((((((((((.((.(..((((((((...))))))))..).))))))).))).)).)))))))))))))).))))))))).....)).)))..)))))	138	44.2	-59.1	1	254.917	188.25	197	281.917	289.583	144.75	49.3333	40.75	161.417	53.1667	110.917	131.333	234.246	207.676	156.087	214.308	207.317	188.161	77.4434	49.7963	152.915	76.6905	73.6222	120.671	middle
aly-miR167a-5p_R+1	TGAAGCTGCCAGCATGATCTAA	22	5'	Diff	(((((..(((((.....(((((((((.((((((((((((((((((((((((.((.(..((((((((...))))))))..).))))))).))).)).)))))))))))))).))))))))).....)).)))..)))))	138	44.2	-59.1	1	254.917	188.25	197	281.917	289.583	144.75	49.3333	40.75	161.417	53.1667	110.917	131.333	234.246	207.676	156.087	214.308	207.317	188.161	77.4434	49.7963	152.915	76.6905	73.6222	120.671	middle
stu-miR167a-5p_R+1	TGAAGCTGCCAGCATGATCTAA	22	5'	Diff	(((.((((((((((((((((((.(((((.(((.((................))))).))))).)))))))))))).)).)))).)))..	87	43.8	-36.9	0.9	254.917	188.25	197	281.917	289.583	144.75	49.3333	40.75	161.417	53.1667	110.917	131.333	234.246	207.676	156.087	214.308	207.317	188.161	77.4434	49.7963	152.915	76.6905	73.6222	120.671	middle
nta-miR168d	TCGCTTGGTGCAGGTCGGGAA	21	5'	Yes	((((.(((((((..((((((((((.(((((((..(((.((((..((((...((((...))))...(((((((((((((.(((....((((((.....((........))((((((((......((((((((((..(((..(((..((((.......))))..))).)))..))))))))))................((..((((..((((..((..(((((.....))))).....))..))))..))))..)).....))))))))..........))))))....))).)))))))).))))).))))..))))..)))..))))))).))))))))))..))))))).))))..	356	39.9	-114.1	0.8	1663.5	1412	1435.5	1765.5	1679.5	1219	751	860	1102	930.5	2002.5	1499.5	1528.61	1557.7	1137.38	1342.1	1202.38	1584.59	1178.92	1050.92	1043.96	1342.2	1329.18	1377.76	middle
mtr-miR168c-3p_1ss10CT	CCCGCCTTGTATCAACTGAAT	21	3'	Diff	((((.(((((((..((((((((((.(((((((..(((.((((..((((...((((...))))...(((((((((((((.(((....((((((.....((........))((((((((......((((((((((..(((..(((..((((.......))))..))).)))..))))))))))................((..((((..((((..((..(((((.....))))).....))..))))..))))..)).....))))))))..........))))))....))).)))))))).))))).))))..))))..)))..))))))).))))))))))..))))))).))))..	356	39.9	-114.1	0.8	713.5	634	543	796	740	488	93	105	177.5	98	238.5	241	655.645	699.423	430.23	605.105	529.777	634.354	145.991	128.309	168.151	141.361	158.307	221.434	middle
csi-miR168-5p	TCGCTTGGTGCAGGTCGGGAA	21	5'	Yes	.(((((..(((((((..((((..((((((((((.(((((.(..(((.((........................((((((........))))))..(..(((((.............)))))..)......)).)))..).))))).))))))))))..))))..))))))).)))))	176	43.5	-66.1	0.9	1663.5	1412	1435.5	1765.5	1679.5	1219	751	860	1102	930.5	2002.5	1499.5	1528.61	1557.7	1137.38	1342.1	1202.38	1584.59	1178.92	1050.92	1043.96	1342.2	1329.18	1377.76	middle
csi-miR168-3p_1ss10CT	CCCGCCTTGTATCAACTGAAT	21	3'	Diff	.(((((..(((((((..((((..((((((((((.(((((.(..(((.((........................((((((........))))))..(..(((((.............)))))..)......)).)))..).))))).))))))))))..))))..))))))).)))))	176	43.5	-66.1	0.9	713.5	634	543	796	740	488	93	105	177.5	98	238.5	241	655.645	699.423	430.23	605.105	529.777	634.354	145.991	128.309	168.151	141.361	158.307	221.434	middle
csi-miR169b-5p_1ss15TC	TAGCCAAGGATGACCTGCCT	20	5'	Diff	.(((...(((.(((.((.((.((((((...(((.((.((..((.((((....(((((.....)))))..)))).))...)).))))).)))))))))).))).)))....)))....	112	40.2	-26.6	0.6	57	99	7	27	58	29	98	144	70	67	256	204	52.3781	109.216	5.54624	20.5249	41.523	37.6973	153.84	175.967	66.3131	96.6445	169.923	187.438	middle
gma-miR171k-5p_1ss11GC	CGATGTTGGTCAGGTTCAATC	21	5'	Diff	((.((((.((((((((((.(((((((((.((.((((..(((((.(((....))))))))...)).)))).))))))))).)))))))))).)))).))	98	42.9	-41.2	1	22	29	21	9	37	7	68	72	56	77	176	85	20.2161	31.9925	16.6387	6.84164	26.4888	9.09934	106.746	87.9837	53.0505	111.069	116.822	78.0993	middle
gma-miR171k-3p_1ss1TN	NTGAGCCGCGCCAATATCACT	21	3'	Diff	((.((((.((((((((((.(((((((((.((.((((..(((((.(((....))))))))...)).)))).))))))))).)))))))))).)))).))	98	42.9	-41.2	1	0	0	0	0	0	0	0	10	0	17	18	13	0	0	0	0	0	0	0	12.22	0	24.5217	11.9477	11.9446	middle
csi-miR171c-5p_2ss2GA9CT	TATTGGAATGGCTCAATCAAA	21	5'	Diff	(((((.((((((((.((((((((((((.((.(((...((((((....))))))...))).)).)))))))))))).)))))))).)))))	90	42.2	-42.2	1.1	0	0	11	10	0	0	86	129	140	102	194	78	0	0	8.71552	7.60183	0	0	135.003	157.637	132.626	147.13	128.77	71.6676	middle
lus-miR171h_L-1R+1	TGAGCCGAACCAATATCACTC	21	3'	Diff	(((.((.(((((((((((.(((.((.((((((((((((.((((((((((......(((((......)))))....)))))))))))))))))))))))).))).))))).))))))..))...)))	126	54	-57.9	0.9	0	0	0	0	0	0	111.5	166.333	212.167	349.667	387	203.167	0	0	0	0	0	0	175.033	203.259	200.992	504.379	256.876	186.673	middle
ptc-miR172a	AGAATCTTGATGATGCTGCAT	21	3'	Yes	....((((.((((.((((((((((((((((.(((((....))..(((.(((((.....(((..((((......))))..)))..))))).)))..............))).)))))))))))))))).)))).))))...	133	41.4	-54.6	0.9	442.167	328.583	376.083	426.167	472.083	208.333	26.8333	27.8333	56.6667	39	41.6667	42.3333	406.313	362.49	297.978	323.965	337.971	270.814	42.1229	34.0122	53.682	56.2558	27.6567	38.8965	middle
nta-miR172d	AGAATCTTGATGATGCTGCAT	21	3'	Yes	..((((.(((((((((((((((((((((.(((..((((.(((((((..(((..((((...((..(((.....(((....((.(((....))).)).(((((((((((((((((((((.((((..(((((((...(((....)))......((...((((.((((.((........(((((.....))))).....((((...))))..)))))).))))...))....)))))))..)))).))))))))))))))))))))).........)))...)))..))...)))).)))...)))))).).))))....))).))))))))))))))))))))).))))...	167	39	-129.4	1	442.167	328.583	376.083	426.167	472.083	208.333	26.8333	27.8333	56.6667	39	41.6667	42.3333	406.313	362.49	297.978	323.965	337.971	270.814	42.1229	34.0122	53.682	56.2558	27.6567	38.8965	middle
stu-miR172a-3p	AGAATCTTGATGATGCTGCAT	21	3'	Yes	(((.((((((((((((((.(((((((....(((((((((((((((((..((........))..)))))........))))))))))))....))))....))).)))))))))))))).)))..	122	25.8	-40.2	1.3	442.167	328.583	376.083	426.167	472.083	208.333	26.8333	27.8333	56.6667	39	41.6667	42.3333	406.313	362.49	297.978	323.965	337.971	270.814	42.1229	34.0122	53.682	56.2558	27.6567	38.8965	middle
cme-miR390a_R+1	AAGCTCAGGAGGGATAGCGCCT	22	5'	Diff	((((.(..(.((((((((((..(((((((((...........(((((......((((..........))))........))))).)))))))))..)))))))))).)..).))))	116	44	-41.2	0.8	18	5	0	14	0	6	31	92	64	29	86	75	16.5404	5.51595	0	10.6426	0	7.79944	48.6638	112.424	60.6291	41.8312	57.0835	68.9111	middle
aly-miR393a-5p	TCCAAAGGGATCGCATTGATCC	22	5'	Yes	(((.((..(((((.((((((((((((((.((((.(((((....((((((...........))))))...........((((((.............)))))).......))))))))).)))))))))))))).)))))..)).)))	147	36.1	-51.8	1	16.75	16	21.5	15.5	12	6.25	13.75	17.75	12.5	1.25	2.25	3.5	15.3918	17.651	17.0349	11.7828	8.59097	8.12441	21.5847	21.6904	11.8416	1.80307	1.49346	3.21585	middle
aly-miR393a-3p	ATCATGCTATCTCTTTGGATT	21	3'	Yes	(((.((..(((((.((((((((((((((.((((.(((((....((((((...........))))))...........((((((.............)))))).......))))))))).)))))))))))))).)))))..)).)))	147	36.1	-51.8	1	25	15.1667	23.1667	14	14.8333	7	2.5	9	5	4.5	3.5	9	22.9728	16.7317	18.3554	10.6426	10.6194	9.09934	3.9245	10.998	4.73665	6.49105	2.32316	8.26933	middle
aly-miR393a-5p	TCCAAAGGGATCGCATTGATCC	22	5'	Yes	(((.((..(((((.((((((((((((((.((((.(((((....((((((...........))))))...........((((((.............)))))).......))))))))).)))))))))))))).)))))..)).)))	147	36.1	-51.8	1	16.75	16	21.5	15.5	12	6.25	13.75	17.75	12.5	1.25	2.25	3.5	15.3918	17.651	17.0349	11.7828	8.59097	8.12441	21.5847	21.6904	11.8416	1.80307	1.49346	3.21585	middle
aly-miR393a-3p	ATCATGCTATCTCTTTGGATT	21	3'	Yes	(((.((..(((((.((((((((((((((.((((.(((((....((((((...........))))))...........((((((.............)))))).......))))))))).)))))))))))))).)))))..)).)))	147	36.1	-51.8	1	25	15.1667	23.1667	14	14.8333	7	2.5	9	5	4.5	3.5	9	22.9728	16.7317	18.3554	10.6426	10.6194	9.09934	3.9245	10.998	4.73665	6.49105	2.32316	8.26933	middle
gma-miR393a_R+1	TCCAAAGGGATCGCATTGATCC	22	5'	Diff	.((((((..((((((((((((.((((.((((((((((..((.....((((((....................))))))..))..)))))))))))))).))))))))))))..)))))).	118	39.2	-48.3	1	16.75	16	21.5	15.5	12	6.25	13.75	17.75	12.5	1.25	2.25	3.5	15.3918	17.651	17.0349	11.7828	8.59097	8.12441	21.5847	21.6904	11.8416	1.80307	1.49346	3.21585	middle
stu-miR393-5p	TCCAAAGGGATCGCATTGATCC	22	5'	Yes	...(((((.((((((((((((.(((((..(((((((.............)))))).)..))))))))))))))))).))))).....	79	41.4	-40.9	1.1	16.75	16	21.5	15.5	12	6.25	13.75	17.75	12.5	1.25	2.25	3.5	15.3918	17.651	17.0349	11.7828	8.59097	8.12441	21.5847	21.6904	11.8416	1.80307	1.49346	3.21585	middle
hbr-miR396a_R-3	CACAGCTTTCTTGAACTT	18	5'	Diff	((((((((((((((.(((((.(((((((((((....(((((....))))))))))))).)))....))))).))))))))))))))	86	37.2	-36	1.1	20	25.6667	22.3333	17.6667	25	6	0	0	0	0	0	0	18.3783	28.3152	17.6951	13.4299	17.8979	7.79944	0	0	0	0	0	0	middle
csi-miR397-5p_L-2R+2	ATTGAGTGCAGCGTTGATGAA	21	5'	Diff	((((...(((((((((((.((((((((((((((((.((((.....(((...(((.....................)))...)))...)))).)))))))))))))))).)))))))))...))..))))....((.....))..............	129	41	-48.5	0.8	3.5	0	5	0	0	0	33.5	27	58.5	23	55.5	54.5	3.2162	0	3.9616	0	0	0	52.5883	32.9939	55.4188	33.1765	36.8388	50.0754	middle
mdm-miR397a_L+1R-1	ATTGAGTGCAGCGTTGATGAA	21	5'	Diff	((((((((.((((.(((((..(((((((((((((((.((.(((...((....))...))).))))))..)))))))))))..))))).)))).))))))))	101	41.6	-41.7	1	3.5	0	5	0	0	0	33.5	27	58.5	23	55.5	54.5	3.2162	0	3.9616	0	0	0	52.5883	32.9939	55.4188	33.1765	36.8388	50.0754	middle
cca-miR398	TGTGTTCTCAGGTCGCCCCTG	21	3'	Yes	((((..(((((.((((..((((((((((((.(((((((((....((.....)).....)))))))))))))))))))))..)))))))))..))))....	96	41	-46.4	1.1	2.5	0	7	0	3	4	58	48	53	36	80	56	2.29728	0	5.54624	0	2.14774	5.19963	91.0484	58.6558	50.2085	51.9284	53.1009	51.4536	middle
ath-miR399b_1ss13GA	TGCCAAAGGAGAATTGCCCTG	21	3'	Diff	((((((((.((((((((.(((((..((((((((.(((.((((((...((................))...)))))).))).))))))))..))))).)))))))).))))))))	114	45.6	-57.2	1.1	10.5	6	15	5.16667	8	32.8333	2	11.6667	5.83333	4	20.3333	15.8333	9.64859	6.61914	11.8848	3.92761	5.72732	42.6803	3.1396	14.2566	5.52609	5.76982	13.4965	14.5479	middle
ath-miR399b_L+1R-1	TTGCCAAAGGAGAGTTGCCCT	21	3'	Diff	((((((((.((((((((.(((((..((((((((.(((.((((((...((................))...)))))).))).))))))))..))))).)))))))).))))))))	114	45.6	-57.2	1.1	2	0	8	1.66667	0	7.33333	2	8.66667	3.33333	0	12.3333	10.3333	1.83783	0	6.33856	1.26697	0	9.53265	3.1396	10.5906	3.15777	0	8.18639	9.49442	middle
ppe-miR399b_L-2R+2	TGCCAAAGGAGAATTGCCCTG	21	3'	Diff	.((((..(((((((((((((((((((((((((..........((((((((((...((((..........))))...)))))))))).)))))))))))))))))))))))))..)))).	117	39.5	-59.5	1.3	10.5	6	15	5.16667	8	32.8333	2	11.6667	5.83333	4	20.3333	15.8333	9.64859	6.61914	11.8848	3.92761	5.72732	42.6803	3.1396	14.2566	5.52609	5.76982	13.4965	14.5479	middle
mes-miR399f_L+1R-1	TTGCCAAAGGAGAGTTGCCCT	21	3'	Diff	..(((((..((((((.(((((.(((.(((((((.((((.(((............)))..)))).))))))).)))))))).))))))..)))))..	92	49	-46.5	1	2	0	8	1.66667	0	7.33333	2	8.66667	3.33333	0	12.3333	10.3333	1.83783	0	6.33856	1.26697	0	9.53265	3.1396	10.5906	3.15777	0	8.18639	9.49442	middle
csi-miR403b-5p_2ss1AC21CG	CGTTTGTGCGTGAATCTAACG	21	5'	Diff	.............((.((((((.((.(((((((((((((((((((((.((...........(((.....((((....))))...)))...((((((((....)))))))).......)).))))))))))))))))))))).)).)))))).))..	141	39.7	-55.7	0.9	55	72	238	171	129	51	54	80	104	61	165	147	50.5402	79.4297	188.572	129.991	92.353	66.2952	84.7692	97.7596	98.5223	87.9898	109.521	135.066	middle
htu-miR403a	TTAGATTCACGCACAAACTCG	21	3'	Yes	.............((.((((((.((.(((((((((((((((((((((.((...........(((.....((((....))))...)))...((((((((....)))))))).......)).))))))))))))))))))))).)).)))))).))..	141	39.7	-55.7	0.9	246	254	957	1040	1052	255	421	500	723	614	933	797	226.053	280.21	758.25	790.59	753.142	331.476	660.885	610.998	684.919	885.667	619.289	732.295	middle
gma-miR408a-3p_L-1	TGCACTGCCTCTTCCCTGGC	20	3'	Diff	((((((((..(((((.((((((.((((((..(((((((.((((.((...((.(((......))).))..))...(((....))))))))))))))..)))))).)))))).)))))..))))))))	126	47.6	-59	1	3.4	9.1	179.183	1.2	15.4	37.2333	493.8	399.983	197.717	225.583	665.533	544.517	3.12431	10.039	141.971	0.912219	11.0251	48.3998	775.167	488.778	187.303	325.394	441.755	500.31	middle
mdm-miR408a_L-1	TGCACTGCCTCTTCCCTGGC	20	3'	Diff	((((.(((((.....(((.((((((((((((((.(((((..(((((((..(((((((........))))))).)))))))..))))).)))))))))))))).))).......))))).))))	123	48.8	-70.1	1.2	3.4	9.1	179.183	1.2	15.4	37.2333	493.8	399.983	197.717	225.583	665.533	544.517	3.12431	10.039	141.971	0.912219	11.0251	48.3998	775.167	488.778	187.303	325.394	441.755	500.31	middle
stu-miR408b-3p_R-1	TGCACTGCCTCTTCCCTGGC	20	3'	Diff	((.((.((((((.(((.(((.(((((..((..((((........))))..))..))))).))).))).)))))).)).))..	80	52.4	-33.7	0.8	3.4	9.1	179.183	1.2	15.4	37.2333	493.8	399.983	197.717	225.583	665.533	544.517	3.12431	10.039	141.971	0.912219	11.0251	48.3998	775.167	488.778	187.303	325.394	441.755	500.31	middle
stu-miR408a-3p_R-1_1ss6AT	TGCACTGCCTCTTCCCTGGT	20	3'	Diff	.((((((.(((((...(((((..(((..(((((.....)))))..)))..)))))...))))).))))))...	69	50.7	-36	1	0	0	0	0	0	0	12.2333	12.2	4.86667	2.7	18.9	10.1667	0	0	0	0	0	0	19.2039	14.9083	4.61034	3.89463	12.5451	9.34128	middle
pvu-miR482-5p_R-1	GGAATGGGCTGATTGGGAAGC	21	5'	Diff	((((((.(..(((((((((((.((((((((((.(((..((((.........))))...))).))))))))))..)))))))))))..).))))))	95	43.2	-49.5	1.2	8	0	7	9	0	0	5	0	24	0	0	5	7.35131	0	5.54624	6.84164	0	0	7.849	0	22.7359	0	0	4.59407	middle
gma-miR482b-3p	TCTTCCCTACACCTCCCATACC	22	3'	Yes	(((((((((((...(((((((((((..((((.......)))).)))))))))))....)))))))))))	69	44.9	-35.8	1.2	6	12	7	11	15	9	0	10	21	6	39	14	5.51348	13.2383	5.54624	8.36201	10.7387	11.6992	0	12.22	19.8939	8.65473	25.8867	12.8634	middle
ptc-miR530b_R+2	TGCATTTGCACCTGCATCTTTC	22	5'	Diff	(((((.(((..((.((((((((((((((((((((((((((..((....(((((((((.((....)).))))))))).(((((.((((..(((.....))).)))).((((.........))))..))))).)).)))))))))))))))))))))))))).))))).)))))	172	39.5	-66.5	1	107.833	131.333	417	165	308	101.667	2.33333	4.66667	4.66667	3.66667	10.3333	4.66667	99.0895	144.886	330.397	125.43	220.502	132.157	3.66286	5.70264	4.42087	5.289	6.85887	4.2878	middle
aqc-miR530_R+2_1ss20CT	TGCATTTGCACCTGCATCTTTC	22	5'	Diff	((((((.((((((((((((((.((((.(((((((((...(((((...(((((...((....))...)))))....)))))(((((.........))))).)))))))....)).)))).)))))))))))))).))))))..	140	43	-64.4	1.1	107.833	131.333	417	165	308	101.667	2.33333	4.66667	4.66667	3.66667	10.3333	4.66667	99.0895	144.886	330.397	125.43	220.502	132.157	3.66286	5.70264	4.42087	5.289	6.85887	4.2878	middle
ppe-miR535a	TGACAACGAGAGAGAGCACGC	21	5'	Yes	.(((.(((..((..(((((((((((((((((((((..((..(((.(((((.......))))).)))..))..)))))))))))))))))))))..))))).))).	103	50.5	-63.3	1.2	0	0	0	0	0	0	10	45	33	11	422	208	0	0	0	0	0	0	15.698	54.9898	31.2619	15.867	280.107	191.113	middle
aly-miR858-5p_L-1R+1	TTCGTTGTCTGTTCGACCTTG	21	5'	Diff	(((((..((((((((..(((...(((((.(((((.(((...(((..((.((((.((((((..((((((((((((((((((((((((...((....)).........((...((((((.((((((((((..(((((((((..((..((((((((...((.((....))))..)))))).))..))..)))))))))..))))...............(((((((((((((..........((((((((.(((((...(((.(((......)))...((..((((...((((((.(((((((..(((((((((.((((((....))))))..(((......((((((.....(((((((((.(((((((((..((..(((........)))..))..))))…	938	32.9	-237.2	0.8	857	561	1034	625	631	471	438	434	1262	867	1401	1025	787.509	618.89	819.259	475.114	451.742	612.256	687.572	530.346	1195.53	1250.61	929.93	941.785	middle
ptc-miR1446a_R+2	TTCTGAACTCTCTCCCTCAACG	22	5'	Diff	(((((.((((((((.(.((((((((..((((((((..((((((((...)))).............)))).))))))))..))).)))))).)))))))).)))))	105	46.7	-40.4	0.8	426.5	433.5	125	283	343	416.5	84.5	348.5	170	328.5	568	242	391.917	478.233	99.04	215.132	245.559	541.411	132.648	425.865	161.046	473.847	377.016	222.353	middle
lja-miR1511-3p_R-3	AACCAGGCTCTGATACCATGA	21	3'	Diff	((((((((((((...((((.((((((..(((..((((.((.........)).))))..))))))))).))))...))))))))))))..	87	43.8	-36.4	0.9	14	10	12	13	9	12	10	6	15	9	142	23	12.8648	11.0319	9.50784	9.88237	6.44323	15.5989	15.698	7.33197	14.2099	12.9821	94.2541	21.1327	middle
ppe-miR1511-3p_L+1R-4	AACCTGGCTCTGATACCA	18	3'	Diff	...(((((((((((((((.(((((((..(((..((...(((....)))..)).)))..))))))).)))))))))))))))...	78	39.3	-37.5	1.1	25.5	52	200	189.5	106.5	68.5	9.5	14	26.5	35.5	35	77	23.4323	57.3659	158.464	144.055	76.2449	89.0436	14.9131	17.1079	25.1042	51.2072	23.2316	70.7487	middle
gma-miR2109-3p	GGAGGCGTAGATACTCACACC	21	3'	Yes	((((.((((((((.((((((((((.(((((........)))))....)))))))))).)))))))).))))	71	53.5	-41.8	1.1	0	0	6	6	8	0	0	0	24	0	0	0	0	0	4.75392	4.5611	5.72732	0	0	0	22.7359	0	0	0	middle
gma-miR3522_L+2	TGAGACCAAATGAGCAGCTGA	21	5'	Diff	(((..((.(((((((.((.((((((((((((.........(((....))).......)))))))))))).)).))))))).)).)))	87	50.6	-40.2	0.9	0	10	6	8	10	8	6	11	38	7	0	12	0	11.0319	4.75392	6.08146	7.15914	10.3993	9.4188	13.4419	35.9985	10.0972	0	11.0258	middle
rgl-miR5139_L-1	AACCTGGCTCTGATACCA	18	5'	Diff	.(..((....(((..(((.(((((((((........((.((((.......)))).))..((((............((((((......))))))................)))).......)).))))))))))..)))..))..).	144	33.6	-23.6	0.5	25.5	52	200	189.5	106.5	68.5	9.5	14	26.5	35.5	35	77	23.4323	57.3659	158.464	144.055	76.2449	89.0436	14.9131	17.1079	25.1042	51.2072	23.2316	70.7487	middle
cca-miR6114-3p_L+1R-1_1	NTCACGTCCATTGTCCCTTTC	21	3'	Diff	...((((((((((..((((....))))(((((....(((((.(((..((.(((.(((((......))))).))).))..))))))))...)))))......))))))))))....	108	41.7	-40.2	0.8	1246	1073	1797	1823	1962	1163	456	841	888.5	756.5	1231	913	1144.97	1183.72	1423.8	1385.81	1404.62	1511.79	715.828	1027.7	841.702	1091.22	817.09	838.878	middle
gma-miR6300_R+5	GTCGTTGTAGTATAGTGGTAAGT	23	3'	Diff	.(((...(((((((((((((((((((((((.(((((...((((...((...((((((.((((.......(((.....((((((((((((((((.((((((......(((.........)))..)))))).)).))))))))...))))))....))).........(((((((((((.....)))))).))))).)))).)))))).))...))))))))).)))))))))))))))))))))))...)))	250	25.9	-72	1.1	114	469	51	92	200	167	128	481	681	177	377	1227	104.756	517.396	40.4083	69.9368	143.183	217.084	200.934	587.78	645.132	255.315	250.238	1127.39	middle
ptc-miR6478_R+2_1ss21GA	CCGACCTTAGCTCAGTTGGTAGA	23	5'	Diff	(((.((((((((.(((.(..((.(((...(..(((.((((((.((((((((.((((((...)))))).)))))).................)).)))))))))..)....))).))..)..)))...)))))))))))	138	47.8	-44.3	0.7	65	46	31	56	32	30	313	204	431	203	370	599	59.7294	50.7467	24.5619	42.5702	22.9093	38.9972	491.347	249.287	408.299	292.818	245.592	550.37	middle
mtr-miR399l_L+2R-2	TATGCCAAAGGAGAGTTGCCC	21	3'	Diff	.........((((((((..((((.((....)).))))....((((((((.......))))).))).............)))))).))...	78	48.9	-21.9	0.5	0	0	8	0	0	6	0	0	0	0	0	0	0	0	6.33856	0	0	7.79944	0	0	0	0	0	0	low
mtr-miR5205b_1ss10AT	CTTATAATTTGGGACGGAGGGAGT	24	3'	Diff	...(((((((......))))))).............	20	44.4	-3.8	0.2	7	3.5	3	3	4	0	0	0	0	0	2.5	0	6.4324	3.86117	2.37696	2.28055	2.86366	0	0	0	0	0	1.6594	0	low
mtr-miR5205b_1ss10AT	CTTATAATTTGGGACGGAGGGAGT	24	5'	Diff	.....(((((((...((.........(((((((.....)))))))....(((((..((.((((.......(((((((....)))))))...)))).))..)))))..))....)))))))..	115	28.7	-20.6	0.6	7	3.5	3	3	4	0	0	0	0	0	2.5	0	6.4324	3.86117	2.37696	2.28055	2.86366	0	0	0	0	0	1.6594	0	low
aly-miR158a-3p	TCCCAAATGTAGACAAAGCA	20	3'	Yes	((((((((...(((...(((((((((((.(((.(((((.((..(((....)))..)).))))).))))))))))))))...)))...))))))))	95	42.1	-41	1	0	0	0	0	0	0	0	0	0	0	2.33333	0	0	0	0	0	0	0	0	0	0	0	1.54878	0	low
aly-miR158a-3p	TCCCAAATGTAGACAAAGCA	20	3'	Yes	((((((((...(((...(((((((((((.(((.(((((.((..(((....)))..)).))))).))))))))))))))...)))...))))))))	95	42.1	-41	1	0	0	0	0	0	0	0	0	0	0	2.33333	0	0	0	0	0	0	0	0	0	0	0	1.54878	0	low
csi-miR166h-3p_L-1_1ss3TC	TCGGACCAGGCTTCCTTCCTC	21	3'	Diff	.......((((((((((.((..((((((((((((((((...(((((((((((((.....)))))))).............)))))...)).))))))))))))).)..))))))))))))......	113	38.1	-49.8	1	3.5	2.5	0	2.5	3.5	0	2.5	0	2.5	0	0	0	3.2162	2.75798	0	1.90046	2.5057	0	3.9245	0	2.36832	0	0	0	low
ptc-miR171l-5p_1ss5AG	TGTGGTATTGGTCCGGCTCATC	22	5'	Diff	(((((((((.(((.((.(((((((((((.((((((..((((.((((....))))..)))).((((((....)))))).)))))).))))))))))).))))).)))))))))	112	44.6	-52.5	1.1	0	0	0	0	0	0	0	0	0	0	3	0	0	0	0	0	0	0	0	0	0	0	1.99128	0	low
ptc-miR172b-5p_2ss11CT21AG	GGAGCATCATTAAGATTCACG	21	5'	Diff	....((((.((((.((((((((((((((((.(((((....))..(((.(((((.....(((..((((......))))..)))..))))).)))..............))).)))))))))))))))).)))).))))...	133	41.4	-54.6	0.9	0	0	0	0	0	0	0	0	5	0	0	0	0	0	0	0	0	0	0	0	4.73665	0	0	0	low
ppe-miR395c_1ss21CT	CTGAAGTGTTTGGGGGAACTT	21	3'	Diff	(((((((((((((..(((((((((..(.(((((((.(..((.(((((((.....))...)))))...))..).))))))).)..)))))))))..)))))))))))))	108	38.9	-50.5	1.2	0	0	2.66667	8.66667	2.33333	7	0	0	0	0	3	1.66667	0	0	2.11285	6.58825	1.67047	9.09934	0	0	0	0	1.99128	1.53136	low
mdm-miR395a_1ss21CT	CTGAAGTGTTTGGGGGAACTT	21	3'	Diff	((((..((...((..(((((((((..(.((((((..(((((((((.(((..((((.((.((........))..)).))))..)))))..))))))).(((....))).)))))).)..)))))))))..))...))..))))	142	46.5	-53.3	0.8	0	0	2.66667	8.66667	2.33333	7	0	0	0	0	3	1.66667	0	0	2.11285	6.58825	1.67047	9.09934	0	0	0	0	1.99128	1.53136	low
aly-miR395c-3p_1ss17GA	CTGAAGTGTTTGGGGGAACTT	21	3'	Diff	.......((((((.........((((((((...(((..((((((((..(((((((((.(((((((((((((...((((((((....)))))))))))).......)))).))))).)))))))))..))))))))..)))...)))).))))))))))........	151	34.3	-48.2	0.8	0	0	2.66667	8.66667	2.33333	7	0	0	0	0	3	1.66667	0	0	2.11285	6.58825	1.67047	9.09934	0	0	0	0	1.99128	1.53136	low
vvi-miR479_1ss13TC	TGTGGTATTGGTCCGGCTCATC	22	5'	Diff	(((.(((.((.((((((((((((((((((.((((........................)))).)))))))))))))))))).))))).)))...	91	43.6	-38.6	0.9	0	0	0	0	0	0	0	0	0	0	3	0	0	0	0	0	0	0	0	0	0	0	1.99128	0	low
gma-miR482a-3p_R-3_2ss14GT20TC	TCTTCCCAATTCCTCCCATCC	21	3'	Diff	((((((.(..(((((((((((.((((((((((.(((..((((.........))))...))).))))))))))..)))))))))))..).))))))	95	43.2	-49.5	1.2	0	0	0	0	11	0	0	0	0	0	0	0	0	0	0	0	7.87506	0	0	0	0	0	0	0	low
ghr-miR482b	TCTTGCCTACTCCACCCATGCC	22	3'	Yes	((((((...((((.(((((....(((..((((.((((..((((.(((((((((..(((((((((.(..((.....((((((((((....))...........))))))))))..))))))))))..))).)))))).))))..)))).))))..)))))))).))))....))))))	177	47.5	-80.6	1	0	0	0	0	0	0	0	0	0	0	8	0	0	0	0	0	0	0	0	0	0	0	5.31009	0	low
gma-miR1507a	TCTCATTCCATACATCGTCTGA	22	3'	Yes	....(((((.((((((((((((((((((((((.(((((((((((.....((((...)))).)))))).))))))))))))))))))))))).)))).))))).....	98	46.7	-54.7	1.1	0	0	0	5	0	0	0	0	6	0	6	5	0	0	0	3.80091	0	0	0	0	5.68398	0	3.98257	4.59407	low
sly-miR1918_L-2R-1_1ss9AG	TTGGTGGGAGTTCGATTCT	19	5'	Diff	(((((((.......(((((((..(((((((((((((..(((((((((((((((...(((((((.(((((......)))))....)))).)))......)))))))))))))))..)))))))))))))..)))))))......)))))))	123	34.7	-60.2	1.2	0	0	0	0	0	0	0	0	0	0	0	7	0	0	0	0	0	0	0	0	0	0	0	6.4317	low
gma-miR4412-5p	TGTTGCGGGTATCTTTGCCTC	21	5'	Yes	((((((((.(((.((((..(((.((((((.(((((..((........))..)))..)).)))))).)))..)))).))).))))))))	88	43.2	-36.9	1	0	0	0	0	0	0	0	0	9	0	0	0	0	0	0	0	0	0	0	0	8.52597	0	0	0	low
mtr-miR5234_L-1R+1	TTTGTTGTGGATGGCAGAAGG	21	3'	Diff	..........((((((((..((...((((.(((((..(((((((...(((((....)))))........................((((((....))))))...)))))))..)))))..))))...))..).))))))).............	130	35.9	-37.9	0.7	0	0	0	0	0	6	0	0	0	0	6	0	0	0	0	0	0	7.79944	0	0	0	0	3.98257	0	low
ath-miR8171_L-2R-1	AGGTGGGCCAGTGGTAGG	18	5'	Diff	((((.....((...(((((((.(((((((((.((((..(((..((..(((((.((.(((......))))).....)))))..))...))))))))))).....)))))))))))).))))))	122	54.1	-43.6	0.7	0	0	0	0	0	0	0	5	0	0	0	0	0	0	0	0	0	0	0	6.10998	0	0	0	0	low
