# Supplementary material for: Identification of Small RNAs Associated with Salt Stress in Chrysanthemums through High-Throughput Sequencing and Bioinformatics Analysis
Source: Genes (Basel). 2023 Feb 23;14(3):561. doi: 10.3390/genes14030561 (PMC10048073; doi:10.3390/genes14030561)
Supplement: Supplementary file 1 [file genes-14-00561-s001.zip › table S2.xlsx]

## Sheet: Sheet1
miR_name	miR_seq	len	type	hairpinLen	CG%	dG	MFEI	Expression level
PC-5p-93150_88	CAAAATGCATCCATCCATCCA	21	5'	128	33.6	-63.5	1.4	middle
PC-3p-251522_22	AATGGATGGATGGATGCATTT	21	3'	128	33.6	-63.5	1.4	low
PC-5p-93150_88	CAAAATGCATCCATCCATCCA	21	5'	130	33.3	-69.1	1.5	middle
PC-3p-251522_22	AATGGATGGATGGATGCATTT	21	3'	130	33.3	-69.1	1.5	low
PC-5p-410396_10	AGGGGCACAAGATAAGAAGGGAAA	24	5'	152	38.7	-82.7	1.4	low
PC-3p-102124_79	ACTTTTTCCCTTCTTATCATGTGC	24	3'	152	38.7	-82.7	1.4	middle
PC-5p-759420_5	AGGGGCACATGATAAGAAGGGAAA	24	5'	152	38.7	-88.1	1.5	low
PC-3p-102124_79	ACTTTTTCCCTTCTTATCATGTGC	24	3'	152	38.7	-88.1	1.5	middle
PC-5p-39433_216	ATATCCCCACATACACACCCATAT	24	5'	153	37.1	-89.3	1.5	middle
PC-3p-147239_49	AATATGGGTGTGTATGTGGGGATA	24	3'	153	37.1	-89.3	1.5	middle
PC-5p-39433_216	ATATCCCCACATACACACCCATAT	24	5'	153	37.1	-97.4	1.7	middle
PC-3p-147239_49	AATATGGGTGTGTATGTGGGGATA	24	3'	153	37.1	-97.4	1.7	middle
PC-5p-428679_10	AACGGCGTCGATGATGTTTTTC	22	5'	166	41.9	-78.8	1.1	low
PC-3p-11500_647	TGCAAAACATCATCGACGCCG	21	3'	166	41.9	-78.8	1.1	middle
PC-3p-11500_647	TGCAAAACATCATCGACGCCG	21	3'	99	39	-55.3	1.4	middle
PC-5p-547078_6	TCAAATCCAATGGCTCAAATC	21	5'	130	37.4	-91.7	1.8	middle
PC-3p-58011_147	TTTGAGCCATTGGATTTGATC	21	3'	130	37.4	-91.7	1.8	middle
PC-3p-58011_147	TTTGAGCCATTGGATTTGATC	21	3'	217	30.5	-127.2	1.9	middle
PC-5p-146541_50	TTGGTTTCCATGTAAGTATTT	21	5'	144	35.9	-83.387	0.9	middle
PC-3p-79800_105	TGAAATATTTACATGGAAACCA	22	3'	144	35.9	-83.387	0.9	middle
PC-3p-79800_105	TGAAATATTTACATGGAAACCA	22	3'	144	37.4	-84.3	1.5	middle
PC-5p-1029_5226	TTTGAAGGGAGTATTGCATGTT	22	5'	92	34.7	-30.4	0.9	middle
PC-5p-1029_5226	TTTGAAGGGAGTATTGCATGTT	22	5'	94	36	-33.3	0.9	middle
PC-5p-73873_114	TTCTAGAACACGTTTAATAGT	21	5'	85	32	-55.7	1.8	middle
PC-3p-369008_12	ATTAAACGTGTTCTAGAACGA	21	3'	85	32	-55.7	1.8	low
PC-5p-66401_128	AAAAATGATTGGGACACTCACATT	24	5'	161	31.5	-85.4	1.7	middle
PC-5p-66401_128	AAAAATGATTGGGACACTCACATT	24	5'	159	32.1	-78.2	1.4	middle
PC-5p-278388_19	ATGACCCGCAACCCGACCCGATA	23	5'	75	57.7	-45.2	1	low
PC-3p-211825_29	TTATCGGGTCGGGTTGAGTCG	21	3'	75	57.7	-45.2	1	middle
PC-5p-261857_21	ACACGTGAACGGGTTTCGATT	21	5'	172	35.4	-61.1	1	low
PC-3p-24362_337	TCGAATCCTTGTTCATGAGCTC	22	3'	172	35.4	-61.1	1	middle
PC-5p-244_20103	TCAAAACACAGTGTTGCCATC	21	5'	137	35.8	-83	1.5	high
PC-3p-37407_227	TGGCAACATTGTGGTTTGATG	21	3'	137	35.8	-83	1.5	middle
PC-5p-73907_114	TTGAAATAGGTGATCTCGGAA	21	5'	103	35	-46.9	1.3	middle
PC-3p-12_162956	TTCCAAGACCACCTATTTCGA	21	3'	103	35	-46.9	1.3	high
PC-5p-838_6216	TAAACCTATCTATAACAACCT	21	5'	80	35.9	-39.6	1.2	middle
PC-3p-29322_285	AAGGCTGTTATAGATAGGTTTATT	24	3'	80	35.9	-39.6	1.2	middle
PC-5p-463190_8	AGTTCGTATGAGGAAGTTATGGCC	24	5'	185	37	-105.8	1.5	low
PC-3p-849259_5	CATAACTTTCTCATACGAACTCCT	24	3'	185	37	-105.8	1.5	low
PC-5p-88306_94	GAAATAGGTGATCTCGGAATT	21	5'	85	36.3	-40.9	1.2	middle
PC-3p-32918_256	ATAATTCCGAGACCACCTATT	21	3'	85	36.3	-40.9	1.2	middle
PC-5p-90363_91	AATTGCATATATATCCCTCCAAAG	24	5'	148	25.8	-51.7	1.3	middle
PC-3p-384229_11	CTTTGGAGGGATATATATGCAATT	24	3'	148	25.8	-51.7	1.3	middle
PC-5p-1494_3633	CTCGATGCAACTTCTCTCACATT	23	5'	188	36.1	-105.8	1.5	middle
PC-3p-24598_334	TGTGAGAGAAGCAGCATTGAGAG	23	3'	188	36.1	-105.8	1.5	middle
PC-5p-33949_249	AGTTAGATGATTGTGAGCCATT	22	5'	176	32.6	-94.3	1.5	middle
PC-3p-153871_47	TGGCTCATAAGTCTCTAACTTG	22	3'	176	32.6	-94.3	1.5	middle
PC-5p-3467_1756	CACGTTGATAGGTTTACTGAC	21	5'	141	40.1	-69.4	1.2	middle
PC-3p-1724_3197	CAGTGAACTTATCAACGTGCT	21	3'	141	40.1	-69.4	1.2	middle
PC-5p-57187_150	AATGTTTTGTTGCATGTTTGGTCC	24	5'	173	37.5	-86.9	1.3	middle
PC-3p-40233_212	AGGGACCAAACATGCAGCAAAACC	24	3'	173	37.5	-86.9	1.3	middle
PC-5p-2444_2353	TAAAAGGAGACCTAATGCATA	21	5'	209	26.5	-73.6	1.3	middle
PC-5p-45203_189	ATGTTTGGTCCCTAATCTGCAATT	24	5'	193	38.1	-89	1.2	middle
PC-5p-214265_29	TGATTTGCACACTCACATTTT	21	5'	142	37.2	-79.2	1.4	low
PC-3p-34005_248	AATGTGCGGTTGTGGTTATTTCTC	24	3'	182	27.1	-55.3	1.1	middle
PC-5p-62765_136	CTTATTTTGAGACTTGTGGGC	21	5'	81	34.5	-44.7	1.5	middle
PC-5p-300698_17	AAAATGACGTGTCAGGTAGTGATT	24	5'	98	34.6	-32.3	0.9	middle
PC-5p-65479_130	ATTTTCGGACCATTTTACCCCTCC	24	5'	218	28.1	-83.7	1.3	middle
PC-3p-4450_1419	ACTTTTGATGTGCTTAACTTGTGC	24	3'	118	31.5	-41.8	1.1	middle
PC-5p-188919_35	ATTATGAGCCATTGGATTTGATTC	24	5'	140	29.2	-52.1	1.2	low
PC-5p-81117_103	TTTCGGCTTATTTTGAGACTT	21	5'	82	31.8	-26	0.9	middle
PC-5p-6321_1070	TTCTATAGTCTCATCGCCAGT	21	5'	90	52.6	-56.4	0.9	middle
PC-3p-58374_146	AGCCGACAAGTCTCAAAATAAGCC	24	3'	83	34.1	-39.1	1.3	middle
PC-3p-427146_10	TTTTTTCTCACTCTTCTCATTTC	23	3'	131	25.5	-35.1	1	middle
PC-3p-4615_1376	ATCAAAAGATGTGGTGTGAGTATC	24	3'	133	33.8	-83.1	1.8	middle
PC-5p-158442_45	AATTTCATATCTCCCCTCCTTTTA	24	5'	141	28.3	-51.4	1.3	middle
PC-3p-243205_24	AGGGACTAAATGGGCAACAGGTTT	24	3'	154	23.8	-57.4	1.5	middle
PC-3p-268483_20	ATTTTTTCTCACCCTTCTCATTTT	24	3'	139	24.8	-46.1	1.3	low
PC-3p-1384_3922	TCCACTCTGCTTTCTCTGAGGT	22	3'	88	44.7	-42.7	1	middle
PC-3p-45948_186	AATATTGGTTGAGATATGGGGATG	24	3'	151	34.4	-88.9	1.6	middle
PC-5p-148554_49	AGGGACATGTCCTCGCCAAAAGGT	24	5'	82	47.7	-49.8	1.2	middle
PC-5p-115928_68	AAATTGATTGGCACACTCTATTTT	24	5'	160	30.5	-81.3	1.6	middle
PC-5p-610444_6	TATGGCTTATTTGGTTCTCGGC	22	5'	135	36.2	-78.1	1.5	low
PC-5p-292328_18	ATTTTGATTTGCACACTCTAATGT	24	5'	143	29.9	-46.2	1.1	low
PC-5p-4886_1313	TTTTGTGGCTTATTTTGAGAC	21	5'	118	27.6	-48.3	1.4	middle
PC-3p-613_8603	TTTAAGTAGTGGACAATTGGA	21	3'	156	27.5	-62	1.4	middle
PC-3p-89875_92	AAAAGTGTGGTGTGAGTATCAATT	24	3'	132	33.8	-71.8	1.6	middle
PC-5p-147401_49	TTTTGTGGCTTATTTTGAGACTT	23	5'	110	26.8	-43.5	1.4	middle
PC-3p-97651_83	ATCCCTGTGTCCTTTTCTGTAGGA	24	3'	179	33.5	-74.5	1.2	middle
PC-5p-657220_6	ATAAACCCTAGCCTCCACCAACA	23	5'	105	41.4	-50.3	1.1	low
PC-5p-165218_42	ATTGCATATATACCCACTAAAACT	24	5'	138	29.9	-62.2	1.4	middle
PC-5p-775562_5	AAGGGAAATGATTTGTACACTCCA	24	5'	182	33.2	-60.5	1	low
PC-3p-445779_9	ATAAATAAATGTGGTGTGAGTATC	24	3'	152	32.9	-46.1	0.9	low
PC-3p-128449_59	ATGTTTAAGTTGGGTAAATATGGA	24	3'	146	29.1	-70.4	1.6	middle
PC-5p-381818_11	AATTGGTGGAAGGTGGGTAGTGTT	24	5'	105	34.2	-39.8	1	low
PC-5p-52328_164	ATCCCATGGGATTCTGTATGAATC	24	5'	153	34.6	-65.7	1.2	middle
PC-3p-11488_648	ACTTATGATGTGCTTAACTTGTGC	24	3'	166	37.9	-73.1	1.1	middle
PC-5p-357428_13	CCGATAAAACAATTACGTTGT	21	5'	149	33.8	-80.2	1.6	low
PC-3p-10768_684	ATCAAAAAATGTGGTGTGAGTATC	24	3'	101	34.6	-49	1.3	middle
