# Supplementary material for: Identification of Small RNAs Associated with Salt Stress in Chrysanthemums through High-Throughput Sequencing and Bioinformatics Analysis
Source: Genes (Basel). 2023 Feb 23;14(3):561. doi: 10.3390/genes14030561 (PMC10048073; doi:10.3390/genes14030561)
Supplement: Supplementary file 1 [file genes-14-00561-s001.zip › table S3.xlsx]

## Sheet: Sheet1
Sample	DCK_L(number)	DCK_L(ratio)	DCK_R(number)	DCK_R(ratio)	D200_L(number)	D200_L(ratio)	D200_R(number)	D200_R(ratio)
Raw Reads	20974590	/	20245902	/	20417390	/	31251146	/
Unique Raw Reads	5726612	/	8357437	/	5464152	/	10800315	/
reads < 15nt after removing 3 adaptor	100990	0.48%	127420	0.63%	102451	0.50%	173356	0.55%
Mappable Reads	20873600	99.52%	20118482	99.37%	20314939	99.50%	31077790	99.45%
Unique reads < 15nt after removing 3 adaptor	38722	0.68%	56765	0.68%	37044	0.68%	68231	0.63%
Unique Mappable Reads	5687890	99.32%	8300672	99.32%	5427108	99.32%	10732084	99.37%
Mapped Reads	13508948	64.41%	10865475	53.67%	12795010	62.67%	16992588	54.37%
Unique Mapped Reads	2796648	48.84%	3625524	43.38%	2562083	46.89%	4215725	39.03%
Number of input Transcript	39185	/	39185	/	39185	/	39185	/
Number of Coverd Transcript	34235	87.37%	35999	91.87%	34519	88.09%	36508	93.17%
