# Supplementary material for: Identification of Small RNAs Associated with Salt Stress in Chrysanthemums through High-Throughput Sequencing and Bioinformatics Analysis
Source: Genes (Basel). 2023 Feb 23;14(3):561. doi: 10.3390/genes14030561 (PMC10048073; doi:10.3390/genes14030561)
Supplement: Supplementary file 1 [file genes-14-00561-s001.zip › table S4.xlsx]

## Sheet: leaf
Query	Transcript	TStart	TStop	TSlice	MFEperfect	MFEsite	MFEratio	AllenScore	Paired	Unpaired	Structure	Sequence	DegradomeRawReads(DCK_L)	DegradomeNormReads(DCK_L)	DegradomePval(DCK_L)	DegradomeRawReads(D200_L)	DegradomeNormReads(D200_L)	DegradomePval(D200_L)	DCK_L	D200_L	significant
PC-3p-102124_79	TRINITY_DN106146_c0_g3	227	253	244	-38.5	-27.3	0.709091	4.5	1-15,253-239;17-22,235-230;23-24,228-227	16-16,238-236[AILt];x-x,229-229[BULt]	((.((((((...(((((((((((((((&)))))))))))))))--.))))))-))	GCGAUAUGAAAGAAGAAGGGAAAAAGU&ACUUUUUCCCUUCUU--AUCAUGU-GC	3	74.7496	0.444136	5	136.329	0.434806	74.7496	136.329	yes
PC-3p-102124_79	TRINITY_DN106792_c0_g1	359	383	373	-38.5	-26.3	0.683117	9	2-3,382-381;5-9,379-375;10-15,373-368;17-24,366-359	1-1,383-383[UP5];4-4,380-380[SIL];x-x,374-374[BULt];16-16,367-367[SIL]	((((((((.((((((.(((((.((.&.)).)))))-)))))).))))))))	GCGCGUGAGAAGAAGAGGAAGUGGC&ACUUUUUCC-CUUCUUAUCAUGUGC	2	49.8331	0.643962	0	0	NA	49.8331	0	yes
PC-3p-102124_79	TRINITY_DN108048_c0_g2	844	875	866	-38.5	-26.6	0.690909	22.5	2-11,874-865;12-22,856-846;24-24,844-844	1-1,875-875[UP5];x-x,864-857[BULt];23-23,845-845[SIL]	(.(((((((((((........((((((((((.&.))))))))))--------))))))))))).)	GGGCGUGAUAGGGAUAGAGACAGGGAGAGAGA&ACUUUUUCCCU--------UCUUAUCAUGUGC	2	49.8331	0.264741	0	0	NA	49.8331	0	yes
PC-3p-102124_79	TRINITY_DN108597_c0_g2	992	1020	1008	-38.5	-25.3	0.657143	13.5	2-5,1019-1016;6-15,1012-1003;16-24,1000-992	1-1,1020-1020[UP5];x-x,1015-1013[BULt];x-x,1002-1001[BULt]	(((((((((..((((((((((...((((.&.))))---))))))))))--)))))))))	GCAUGUGAUUAGAGAAGGGGGCAUGAAGA&ACUUU---UUCCCUUCUU--AUCAUGUGC	0	0	NA	1	27.2658	0.963893	0	27.2658	yes
PC-3p-102124_79	TRINITY_DN108912_c1_g2	250	275	265	-38.5	-25.82	0.670649	8.5	2-7,274-269;8-18,267-257;22-24,252-250	1-1,275-275[UP5];x-x,268-268[BULt];19-21,256-253[AILt]	(((....(((((((((((.((((((.&.))))))-)))))))))))-...)))	GCAAGAGGGUAAGAAGGGUAAGAAGG&ACUUUUU-CCCUUCUUAUC-AUGUGC	8	199.332	0.0575223	1	27.2658	0.908017	199.332	27.2658	yes
PC-3p-102124_79	TRINITY_DN110000_c6_g1	159	184	174	-38.5	-26.02	0.675844	8.5	2-7,183-178;8-18,176-166;22-24,161-159	1-1,184-184[UP5];x-x,177-177[BULt];19-21,165-162[AILt]	(((....(((((((((((.((((((.&.))))))-)))))))))))-...)))	GCAAAAGGGUAAGAAGGGUAAGAAGG&ACUUUUU-CCCUUCUUAUC-AUGUGC	4	99.6661	0.36467	4	109.063	0.389829	99.6661	109.063	yes
PC-3p-102124_79	TRINITY_DN110026_c0_g1	78	101	92	-38.5	-26.5	0.688312	5.5	2-14,100-88;15-18,86-83;20-23,82-79	1-1,101-101[UP5];x-x,87-87[BULt];19-19,x-x[BULq];24-24,78-78[UP3]	.((((-((((.(((((((((((((.&.)))))))))))))-)))).)))).	UCACA-GAUGAAGAAGGGAAGAAGA&ACUUUUUCCCUUCU-UAUCAUGUGC	8	199.332	0.581351	10	272.658	0.57089	199.332	272.658	yes
PC-3p-102124_79	TRINITY_DN113018_c1_g1	677	700	691	-38.5	-26	0.675325	9	1-2,700-699;4-22,697-679	3-3,698-698[SIL];23-24,678-677[UP3]	..(((((((((((((((((((.((&)).)))))))))))))))))))..	GAAUGUGGUAGGGAGGGAGGAUGU&ACUUUUUCCCUUCUUAUCAUGUGC	3	74.7496	0.715055	0	0	NA	74.7496	0	yes
PC-3p-102124_79	TRINITY_DN113770_c2_g2	788	813	802	-38.5	-28.3	0.735065	11.5	1-5,813-809;8-8,805-805;9-24,803-788	6-7,808-806[AILt];x-x,804-804[BULt]	((((((((((((((((.(...(((((&)))))-..)-))))))))))))))))	GCGCAUGAUGGGAAGGUGUUUGAGGU&ACUUU-UUC-CCUUCUUAUCAUGUGC	0	0	NA	1	27.2658	0.34242	0	27.2658	yes
PC-3p-102124_79	TRINITY_DN113809_c1_g1	6	30	21	-38.5	-27.3	0.709091	8	2-20,29-11;21-21,9-9;23-24,7-6	1-1,30-30[UP5];x-x,10-10[BULt];22-22,8-8[SIL]	((.(.(((((((((((((((((((.&.)))))))))))))))))))-).))	GUUCGAUGGUGGGAGGGGAGGAAGA&ACUUUUUCCCUUCUUAUCAU-GUGC	0	0	NA	1	27.2658	0.581309	0	27.2658	yes
PC-3p-102124_79	TRINITY_DN119067_c1_g1	1107	1131	1121	-38.5	-27.3	0.709091	8.5	1-9,1131-1123;10-10,1121-1121;13-22,1118-1109;24-24,1107-1107	x-x,1122-1122[BULt];11-12,1120-1119[SIL];23-23,1108-1108[SIL]	(.((((((((((..(.(((((((((&)))))))))-)..)))))))))).)	GGGCAUGAUAAGUUGAGGAAAAGGU&ACUUUUUCC-CUUCUUAUCAUGUGC	0	0	NA	1	27.2658	0.619914	0	27.2658	yes
PC-3p-102124_79	TRINITY_DN119309_c3_g2	684	707	698	-38.5	-26.78	0.695584	10	1-3,707-705;7-20,701-688;22-24,686-684	4-6,704-702[SIL];21-21,687-687[SIL]	(((.((((((((((((((...(((&)))...)))))))))))))).)))	GCAAGUGAUAGGAGGGGAUUCGGU&ACUUUUUCCCUUCUUAUCAUGUGC	8	199.332	0.527268	4	109.063	0.517121	199.332	109.063	yes
PC-3p-102124_79	TRINITY_DN119428_c1_g2	476	503	494	-38.5	-29.56	0.767792	9	2-14,502-490;17-24,483-476	1-1,503-503[UP5];15-16,489-484[AILt]	((((((((......(((((((((((((.&.)))))))))))))----..))))))))	GCACAUGGAAAGGUGGAAGGGAGAAAGC&ACUUUUUCCCUUCU----UAUCAUGUGC	0	0	NA	1	27.2658	0.175907	0	27.2658	yes
PC-3p-102124_79	TRINITY_DN120796_c0_g1	233	256	247	-38.5	-27.3	0.709091	9	2-20,255-237;22-22,235-235;24-24,233-233	1-1,256-256[UP5];21-21,236-236[SIL];23-23,234-234[SIL]	(.(.(((((((((((((((((((.&.))))))))))))))))))).).)	GAGGAUGAUGAGGAGGGGGAGGGG&ACUUUUUCCCUUCUUAUCAUGUGC	6	149.499	0.0160012	1	27.2658	0.594594	149.499	27.2658	yes
PC-3p-102124_79	TRINITY_DN123685_c2_g2	159	190	180	-38.5	-25.98	0.674805	13.5	1-9,190-182;10-14,180-176;17-24,166-159	x-x,181-181[BULt];15-16,175-167[AILt]	((((((((.........(((((.(((((((((&)))))))))-)))))-------..))))))))	GCACAUGAGGUGGACCAGGAGGUGGAGAAAGU&ACUUUUUCC-CUUCU-------UAUCAUGUGC	1	24.9165	0.922685	0	0	NA	24.9165	0	yes
PC-3p-102124_79	TRINITY_DN124299_c2_g2	371	396	387	-38.5	-25.6	0.664935	9.5	3-11,394-386;12-19,384-377;20-24,375-371	1-2,396-395[UP5];x-x,385-385[BULt];x-x,376-376[BULt]	(((((.((((((((.(((((((((..&..)))))))))-))))))))-)))))	GUACAUUGGUGAGAUGGGGAAAGACU&ACUUUUUCCCU-UCUUAUCA-UGUGC	0	0	NA	1	27.2658	0.937531	0	27.2658	yes
PC-3p-102124_79	TRINITY_DN93109_c1_g3	225	253	243	-38.5	-25.06	0.650909	12	1-8,253-246;9-18,244-235;21-24,228-225	x-x,245-245[BULt];19-20,234-229[AILt]	((((......((((((((((.((((((((&))))))))-))))))))))----..))))	GCGCCUAGCAGAUAGGAAGGUGGAGAGGU&ACUUUUUC-CCUUCUUAUC----AUGUGC	0	0	NA	1	27.2658	0.981655	0	27.2658	yes
PC-3p-102124_79	TRINITY_DN98146_c1_g5	111	133	124	-38.5	-25.08	0.651429	8.5	2-15,132-119;22-24,113-111	1-1,133-133[UP5];16-21,118-114[AILq]	(((.....-((((((((((((((.&.))))))))))))))......)))	GCAACUAG-GAGAAGGGAAAGAGG&ACUUUUUCCCUUCUUAUCAUGUGC	1	24.9165	0.990249	0	0	NA	24.9165	0	yes
PC-3p-10768_684	TRINITY_DN111366_c1_g1	251	277	265	-36.4	-23.8	0.653846	12.5	1-8,277-270;9-10,266-265;12-20,263-255;23-24,252-251	x-x,269-267[BULt];11-11,264-264[SIL];21-22,254-253[SIL]	((..(((((((((.((...((((((((&))))))))---)).)))))))))..))	GAGUCUCGCACCAGGUAAGUUUUUGGU&AUCAAAAA---AUGUGGUGUGAGUAUC	0	0	NA	2	54.5316	0.595486	0	54.5316	yes
PC-3p-10768_684	TRINITY_DN122618_c2_g1	560	583	574	-36.4	-24.1	0.662088	10	2-4,582-580;7-21,577-563	1-1,583-583[UP5];5-6,579-578[SIL];22-24,562-560[UP3]	...(((((((((((((((..(((.&.)))..)))))))))))))))...	GCCACUUGCACCACGUUUGGUGAA&AUCAAAAAAUGUGGUGUGAGUAUC	0	0	NA	1	27.2658	0.741872	0	27.2658	yes
PC-3p-10768_684	TRINITY_DN98618_c3_g1	444	470	461	-36.4	-25.98	0.713736	10.5	1-4,470-467;8-16,463-455;17-24,451-444	5-7,466-464[SIL];x-x,454-452[BULt]	((((((((...(((((((((...((((&))))...)))))))))---))))))))	GAUGCUCAGUUCACCACAUUGGGUGGU&AUCAAAAAAUGUGGUG---UGAGUAUC	3	74.7496	0.13591	1	27.2658	0.458092	74.7496	27.2658	yes
PC-3p-11488_648	TRINITY_DN124297_c2_g2	386	408	399	-38.6	-26.4	0.683938	8	3-16,406-393;18-24,392-386	1-2,408-407[UP5];17-17,x-x[BULq]	(((((((-((((((((((((((..&..)))))))))))))).)))))))	GCACGAG-UAGGUACGUUAUAAAG&ACUUAUGAUGUGCUUAACUUGUGC	0	0	NA	1	27.2658	0.383489	0	27.2658	yes
PC-3p-11488_648	TRINITY_DN95829_c1_g1	451	477	468	-38.6	-25.2	0.65285	13	1-11,477-467;12-14,463-461;16-24,459-451	x-x,466-464[BULt];15-15,460-460[SIL]	(((((((((.(((...(((((((((((&)))))))))))---))).)))))))))	GCAUGAGUUUAGUGACGCAUCGUGGGU&ACUUAUGAUGU---GCUUAACUUGUGC	0	0	NA	3	81.7974	0.445818	0	81.7974	yes
PC-3p-11500_647	TRINITY_DN100463_c0_g1	1917	1937	1929	-37.6	-26.42	0.70266	9	1-3,1937-1935;8-18,1931-1921;19-21,1919-1917	4-7,1934-1932[AILq];x-x,1920-1920[BULt]	(((.(((((((((((...-(((&)))....)))))))))))-)))	CGGUCGUCGAUGAUGACG-GCA&UGCAAAACAUCAUCGACG-CCG	1	24.9165	0.260041	4	109.063	0.145641	24.9165	109.063	yes
PC-3p-11500_647	TRINITY_DN101981_c0_g1	459	481	470	-37.6	-24.6	0.654255	7	1-7,481-475;8-14,472-466;16-19,464-461	x-x,474-473[BULt];15-15,465-465[SIL];20-21,460-459[UP3]	..((((.(((((((..(((((((&)))))))--))))))).))))..	AAGCGUGGAUGAUGCCUUUUGCA&UGCAAAA--CAUCAUCGACGCCG	2	49.8331	0.703279	0	0	NA	49.8331	0	yes
PC-3p-11500_647	TRINITY_DN102205_c0_g1	425	447	437	-37.6	-24.7	0.656915	8.5	2-5,446-443;8-15,439-432;16-21,430-425	1-1,447-447[UP5];6-7,442-440[AILt];x-x,431-431[BULt]	((((((.((((((((...((((.&.))))-..))))))))-))))))	CGGCGUGUGAUGAUGCUAUUGCU&UGCAA-AACAUCAUCG-ACGCCG	0	0	NA	3	81.7974	0.661133	0	81.7974	yes
PC-3p-11500_647	TRINITY_DN105366_c0_g1	691	712	702	-37.6	-24.5	0.651596	8.5	2-4,711-709;7-7,706-706;8-17,704-695;19-21,693-691	1-1,712-712[UP5];5-6,708-707[SIL];x-x,705-705[BULt];18-18,694-694[SIL]	(((.((((((((((.(..(((.&.)))..)-)))))))))).)))	CGGGGUUGAUGAUGCUGCUGCU&UGCAAAA-CAUCAUCGACGCCG	0	0	NA	1	27.2658	0.864557	0	27.2658	yes
PC-3p-11500_647	TRINITY_DN105683_c0_g1	564	584	575	-37.6	-30.1	0.800532	3.5	1-11,584-574;13-21,572-564	12-12,573-573[SIL]	(((((((((.(((((((((((&))))))))))).)))))))))	UGGCGUUGAAGAUGUUUUGCG&UGCAAAACAUCAUCGACGCCG	2	49.8331	0.0396896	12	327.189	0.00120179	49.8331	327.189	yes
PC-3p-11500_647	TRINITY_DN114475_c3_g2	527	549	538	-37.6	-26.26	0.698404	12	1-3,549-547;7-12,541-536;14-21,534-527	4-6,546-542[AILt];13-13,535-535[SIL]	((((((((.((((((.....(((&)))--...)))))).))))))))	CGGCGUCGUUGGUGUGUAAAGCA&UGC--AAAACAUCAUCGACGCCG	2	49.8331	0.183308	0	0	NA	49.8331	0	yes
PC-3p-11500_647	TRINITY_DN115291_c0_g2	873	892	884	-37.6	-25.6	0.680851	4	1-7,892-886;9-17,885-877;19-21,875-873	8-8,x-x[BULq];18-18,876-876[SIL]	(((.(((((((((-(((((((&))))))).))))))))).)))	CGGAGUCGAUGGU-UUUUGCA&UGCAAAACAUCAUCGACGCCG	0	0	NA	1	27.2658	0.508058	0	27.2658	yes
PC-3p-11500_647	TRINITY_DN116316_c0_g1	233	253	244	-37.6	-25.1	0.667553	6	1-1,253-253;3-19,251-235	2-2,252-252[SIL];20-21,234-233[UP3]	..(((((((((((((((((.(&).)))))))))))))))))..	UCGUGUUGAUGGUGUUUUGGA&UGCAAAACAUCAUCGACGCCG	1	24.9165	0.76965	2	54.5316	0.535754	24.9165	54.5316	yes
PC-3p-11500_647	TRINITY_DN117449_c2_g1	795	814	806	-37.6	-25.9	0.68883	6	1-3,814-812;6-21,810-795	4-5,811-811[AILq]	((((((((((((((((.-(((&)))..))))))))))))))))	UGGUGUUGGUGAUGUUC-GCA&UGCAAAACAUCAUCGACGCCG	5	124.583	0.305448	11	299.924	0.298235	124.583	299.924	yes
PC-3p-11500_647	TRINITY_DN119291_c0_g1	203	222	213	-37.6	-27.2	0.723404	4	2-17,221-206;19-21,205-203	1-1,222-222[UP5];18-18,x-x[BULq]	(((-((((((((((((((((.&.)))))))))))))))).)))	CGG-GUUGGUGAUGUUUUGUC&UGCAAAACAUCAUCGACGCCG	2	49.8331	0.0778039	0	0	NA	49.8331	0	yes
PC-3p-11500_647	TRINITY_DN119970_c1_g3	136	155	146	-37.6	-26.1	0.694149	4.5	1-14,155-142;16-19,141-138	15-15,x-x[BULq];20-21,137-136[UP3]	..((((-((((((((((((((&)))))))))))))).))))..	GCGCGU-GGUGGUGUUUUGCA&UGCAAAACAUCAUCGACGCCG	0	0	NA	1	27.2658	0.383489	0	27.2658	yes
PC-3p-11500_647	TRINITY_DN121323_c0_g3	41	63	53	-37.6	-24.7	0.656915	8.5	2-5,62-59;8-15,55-48;16-21,46-41	1-1,63-63[UP5];6-7,58-56[AILt];x-x,47-47[BULt]	((((((.((((((((...((((.&.))))-..))))))))-))))))	CGGCGUGUGAUGAUGCUAUUGCU&UGCAA-AACAUCAUCG-ACGCCG	0	0	NA	4	109.063	0.680556	0	109.063	yes
PC-3p-11500_647	TRINITY_DN97298_c0_g1	249	267	260	-37.6	-24.6	0.654255	7.5	1-4,267-264;7-15,263-255;17-20,253-250	5-6,x-x[BULq];16-16,254-254[SIL];21-21,249-249[UP3]	.((((.(((((((((--((((&))))..))))))))).)))).	AGGCGGCGGUGGUGU--UGCA&UGCAAAACAUCAUCGACGCCG	1	24.9165	0.891506	2	54.5316	0.389829	24.9165	54.5316	yes
PC-3p-128449_59	TRINITY_DN102286_c0_g1	638	665	656	-34.8	-22.8	0.655172	8.5	3-13,663-653;14-24,648-638	1-2,665-664[UP5];x-x,652-649[BULt]	(((((((((((....(((((((((((..&..)))))))))))----)))))))))))	UUCAUGUUUAUAAUACCAACUUAAACUA&AUGUUUAAGUUGG----GUAAAUAUGGA	0	0	NA	4	109.063	0.467202	0	109.063	yes
PC-3p-128449_59	TRINITY_DN113040_c2_g1	776	798	789	-34.8	-23.1	0.663793	7.5	1-2,798-797;4-16,795-783;19-23,781-777	3-3,796-796[SIL];17-18,782-782[AILq];24-24,776-776[UP3]	.(((((.-(((((((((((((.((&)).)))))))))))))..))))).	ACCAUAG-UAUCCAACUUAAGGGU&AUGUUUAAGUUGGGUAAAUAUGGA	0	0	NA	1	27.2658	0.567588	0	27.2658	yes
PC-3p-128449_59	TRINITY_DN123865_c4_g2	1332	1356	1347	-34.8	-22.7	0.652299	9	1-10,1356-1347;13-18,1343-1338;20-24,1336-1332	11-12,1346-1344[AILt];19-19,1337-1337[SIL]	(((((.((((((...((((((((((&))))))))))-..)))))).)))))	UCCAUCUUUACCAUCACUUGAGCAU&AUGUUUAAGU-UGGGUAAAUAUGGA	1	24.9165	0.732217	0	0	NA	24.9165	0	yes
PC-3p-128449_59	TRINITY_DN123933_c1_g2	221	245	236	-34.8	-23.5	0.675287	8.5	2-11,244-235;13-15,233-231;17-24,228-221	1-1,245-245[UP5];12-12,234-234[SIL];16-16,230-229[AILt]	((((((((..(((.((((((((((.&.)))))))))).)))-.))))))))	UCCAUGUUGAACCAAGCUUGGACAA&AUGUUUAAGUUGGGU-AAAUAUGGA	0	0	NA	2	54.5316	0.14708	0	54.5316	yes
PC-3p-128449_59	TRINITY_DN94767_c0_g1	675	699	690	-34.8	-23.8	0.683908	8.5	3-13,697-687;15-24,684-675	1-2,699-698[UP5];14-14,686-685[AILt]	((((((((((..(((((((((((..&..)))))))))))-.))))))))))	UCCAUGUUUGUAUCAGCUUAAGCUC&AUGUUUAAGUUGG-GUAAAUAUGGA	1	24.9165	0.386997	3	81.7974	0.225688	24.9165	81.7974	yes
PC-3p-128449_59	TRINITY_DN96434_c0_g2	1379	1405	1396	-34.8	-22.7	0.652299	13	1-10,1405-1396;11-16,1392-1387;18-23,1385-1380	x-x,1395-1393[BULt];17-17,1386-1386[SIL];24-24,1379-1379[UP3]	.((((((.((((((...((((((((((&))))))))))---)))))).)))))).	ACUAUAUAUGCCCGGUUGCUUGGACAU&AUGUUUAAGU---UGGGUAAAUAUGGA	0	0	NA	1	27.2658	0.686774	0	27.2658	yes
PC-3p-128449_59	TRINITY_DN99864_c1_g2	479	503	494	-34.8	-23.4	0.672414	8	3-15,501-489;18-23,485-480	1-2,503-502[UP5];16-17,488-486[AILt];24-24,479-479[UP3]	.((((((...(((((((((((((..&..)))))))))))))-..)))))).	CUCAUAUCCGGCCCAACUUAAACCC&AUGUUUAAGUUGGGU-AAAUAUGGA	1	24.9165	0.563161	1	27.2658	0.508058	24.9165	27.2658	yes
PC-3p-12_162956	TRINITY_DN106719_c2_g1	83	104	95	-35.7	-24.1	0.67507	10.5	3-5,102-100;7-10,98-95;12-21,92-83	1-2,104-103[UP5];6-6,99-99[SIL];11-11,94-93[AILt]	((((((((((..((((.(((..&..))).))))-.))))))))))	UCGAGGUGGGGAGGUCGUGGUU&UUCCAAGACC-ACCUAUUUCGA	0	0	NA	1	27.2658	0.97701	0	27.2658	yes
PC-3p-12_162956	TRINITY_DN108958_c0_g1	83	103	94	-35.7	-30.5	0.854342	2.5	1-4,103-100;6-21,98-83	5-5,99-99[SIL]	((((((((((((((((.((((&)))).))))))))))))))))	UUGAAAUAGGUGGUCUCGGAA&UUCCAAGACCACCUAUUUCGA	8	199.332	0.00115152	17	463.518	0.00120179	199.332	463.518	yes
PC-3p-12_162956	TRINITY_DN111421_c1_g1	1488	1513	1503	-35.7	-23.5	0.658263	9.5	1-4,1513-1510;5-18,1508-1495;19-21,1490-1488	x-x,1509-1509[BULt];x-x,1494-1491[BULt]	(((....((((((((((((((.((((&))))-))))))))))))))----)))	UCGGGAUGAGUGGGUGGUUUUAGGGA&UUCC-AAGACCACCUAUUU----CGA	0	0	NA	2	54.5316	0.765091	0	54.5316	yes
PC-3p-12_162956	TRINITY_DN112074_c0_g3	631	651	642	-35.7	-25.1	0.703081	7	3-14,649-638;16-20,636-632	1-2,651-650[UP5];15-15,637-637[SIL];21-21,631-631[UP3]	.(((((.((((((((((((..&..)))))))))))).))))).	GCGGGACAGGUGGUUUUGGUC&UUCCAAGACCACCUAUUUCGA	0	0	NA	1	27.2658	0.868855	0	27.2658	yes
PC-3p-12_162956	TRINITY_DN112151_c1_g1	447	467	458	-35.7	-23.8	0.666667	4.5	1-4,467-464;6-8,462-460;10-21,458-447	5-5,463-463[SIL];9-9,459-459[SIL]	((((((((((((.(((.((((&)))).))).))))))))))))	UUGAAAUAGGUGAUCUCGGAA&UUCCAAGACCACCUAUUUCGA	2	49.8331	0.674532	7	190.861	0.943449	49.8331	190.861	yes
PC-3p-12_162956	TRINITY_DN113025_c1_g1	414	436	427	-35.7	-25.5	0.714286	7.5	3-13,434-424;14-21,421-414	1-2,436-435[UP5];x-x,423-422[BULt]	((((((((..(((((((((((..&..)))))))))))--))))))))	UCGAGGUGGUGGUGGUUUUGGUA&UUCCAAGACCACC--UAUUUCGA	0	0	NA	2	54.5316	0.325334	0	54.5316	yes
PC-3p-12_162956	TRINITY_DN113071_c0_g4	580	600	591	-35.7	-30.2	0.845938	3	1-4,600-597;6-21,595-580	5-5,596-596[SIL]	((((((((((((((((.((((&)))).))))))))))))))))	UUGGAAUAGGUGGUCUCGGAA&UUCCAAGACCACCUAUUUCGA	19	473.414	0.0778039	28	763.442	0.0756843	473.414	763.442	yes
PC-3p-12_162956	TRINITY_DN113251_c3_g1	893	913	904	-35.7	-25	0.70028	7.5	3-14,911-900;17-20,897-894	1-2,913-912[UP5];15-16,899-898[SIL];21-21,893-893[UP3]	.((((..((((((((((((..&..))))))))))))..)))).	GCGAAUGGGGUGGUUUUGGUG&UUCCAAGACCACCUAUUUCGA	0	0	NA	5	136.329	0.762195	0	136.329	yes
PC-3p-12_162956	TRINITY_DN115308_c2_g3	1444	1463	1454	-35.7	-23.3	0.652661	6.5	1-5,1463-1459;7-13,1457-1451;15-19,1450-1446	6-6,1458-1458[SIL];14-14,x-x[BULq];20-21,1445-1444[UP3]	..(((((-(((((((.(((((&))))).))))))).)))))..	CAGAGGU-GGUGGUCGUGGAG&UUCCAAGACCACCUAUUUCGA	1	24.9165	0.999187	0	0	NA	24.9165	0	yes
PC-3p-12_162956	TRINITY_DN115838_c1_g1	855	874	865	-35.7	-23.7	0.663866	8.5	3-5,872-870;7-10,868-865;12-21,864-855	1-2,874-873[UP5];6-6,869-869[SIL];11-11,x-x[BULq]	((((((((((-((((.(((..&..))).)))).))))))))))	UCGGGGUAGG-GGUCGUGGUG&UUCCAAGACCACCUAUUUCGA	1	24.9165	0.997485	1	27.2658	0.994066	24.9165	27.2658	yes
PC-3p-12_162956	TRINITY_DN117327_c0_g1	475	495	486	-35.7	-24.3	0.680672	7.5	3-15,493-481;17-20,479-476	1-2,495-494[UP5];16-16,480-480[SIL];21-21,475-475[UP3]	.((((.(((((((((((((..&..))))))))))))).)))).	GUGGAUUGGGUGGUUUUGGUA&UUCCAAGACCACCUAUUUCGA	0	0	NA	1	27.2658	0.967222	0	27.2658	yes
PC-3p-12_162956	TRINITY_DN122591_c1_g1	683	703	693	-35.7	-24.2	0.677871	5	1-3,703-701;4-14,699-689;16-20,688-684	x-x,700-700[BULt];15-15,x-x[BULq];21-21,683-683[UP3]	.(((((-(((((((((((.(((&)))-))))))))))).))))).	GUGAAA-AGGUGGUCUUGAGAG&UUC-CAAGACCACCUAUUUCGA	0	0	NA	1	27.2658	0.970244	0	27.2658	yes
PC-3p-12_162956	TRINITY_DN122928_c0_g2	21	41	32	-35.7	-26.1	0.731092	5	1-5,41-37;7-14,35-28;16-20,26-22	6-6,36-36[SIL];15-15,27-27[SIL];21-21,21-21[UP3]	.(((((.((((((((.(((((&))))).)))))))).))))).	ACGGAGGAGGUGGUCCUGGAA&UUCCAAGACCACCUAUUUCGA	3	74.7496	0.50773	0	0	NA	74.7496	0	yes
PC-3p-12_162956	TRINITY_DN124260_c9_g1	533	558	549	-35.7	-23.5	0.658263	11	2-10,557-549;11-13,545-543;14-20,540-534	1-1,558-558[UP5];x-x,548-546[BULt];x-x,542-541[BULt];21-21,533-533[UP3]	.(((((((..(((...(((((((((.&.)))))))))---)))--))))))).	CCGAAGUGGUGGUGCAGGUCUUGGAC&UUCCAAGACC---ACC--UAUUUCGA	2	49.8331	0.971092	0	0	NA	49.8331	0	yes
PC-3p-12_162956	TRINITY_DN90575_c2_g1	94	114	105	-35.7	-30.2	0.845938	3	1-4,114-111;6-21,109-94	5-5,110-110[SIL]	((((((((((((((((.((((&)))).))))))))))))))))	UUGGAAUAGGUGGUCUCGGAA&UUCCAAGACCACCUAUUUCGA	0	0	NA	6	163.595	0.00180214	0	163.595	yes
PC-3p-12_162956	TRINITY_DN94790_c1_g2	108	128	119	-35.7	-34.9	0.977591	0.5	1-21,128-108	NA	(((((((((((((((((((((&)))))))))))))))))))))	UUGAAAUAGGUGGUCUUGGAA&UUCCAAGACCACCUAUUUCGA	1	24.9165	0.0369453	46	1254.23	0.000601075	24.9165	1254.23	yes
PC-3p-12_162956	TRINITY_DN96463_c1_g5	318	340	331	-35.7	-23.5	0.658263	7.5	1-5,340-336;7-13,334-328;14-19,325-320	6-6,335-335[SIL];x-x,327-326[BULt];20-21,319-318[UP3]	..((((((..(((((((.(((((&))))).)))))))--))))))..	CAGAGAUAGUGGUGGUCGUGGGA&UUCCAAGACCACC--UAUUUCGA	2	49.8331	0.733502	0	0	NA	49.8331	0	yes
PC-3p-12_162956	TRINITY_DN99808_c1_g2	313	333	324	-35.7	-28.2	0.789916	2.5	1-8,333-326;10-21,324-313	9-9,325-325[SIL]	((((((((((((.((((((((&)))))))).))))))))))))	UUGAAAUAGGUGAUCUUGGAA&UUCCAAGACCACCUAUUUCGA	0	0	NA	4	109.063	0.0071891	0	109.063	yes
PC-3p-1384_3922	TRINITY_DN104025_c2_g2	209	235	225	-42	-28.48	0.678095	15.5	1-6,235-230;7-11,228-224;13-22,218-209	x-x,229-229[BULt];12-12,223-219[AILt]	((((((((((.....(((((.((((((&))))))-)))))----.))))))))))	GCCUUAGGGACACGUGGCGGAAGUGGA&UCCACU-CUGCU----UUCUCUGAGGU	2	49.8331	0.444136	0	0	NA	49.8331	0	yes
PC-3p-1384_3922	TRINITY_DN105681_c0_g1	296	326	308	-42	-28.4	0.67619	20.5	1-5,326-322;6-22,312-296	x-x,321-313[BULt]	(((((((((((((((((.........(((((&)))))---------)))))))))))))))))	AUCUUGGAGAAAGCGGAGCCAAAAUGGUGGA&UCCAC---------UCUGCUUUCUCUGAGGU	7	174.416	0.466198	22	599.847	0.0184663	174.416	599.847	yes
PC-3p-1384_3922	TRINITY_DN108386_c0_g1	802	823	815	-42	-27.3	0.65	7	1-5,823-819;7-15,818-810;16-19,808-805;21-22,803-802	6-6,x-x[BULq];x-x,809-809[BULt];20-20,804-804[SIL]	((.((((.(((((((((-(((((&))))).)))))))))-)))).))	AUGUCAGUGGAAGGCGG-GUGGA&UCCACUCUGCUUUCU-CUGAGGU	1	24.9165	0.922685	0	0	NA	24.9165	0	yes
PC-3p-1384_3922	TRINITY_DN111820_c0_g1	447	466	458	-42	-27.3	0.65	5	1-3,466-464;5-7,462-460;9-14,459-454;16-22,453-447	4-4,463-463[SIL];8-8,x-x[BULq];15-15,x-x[BULq]	(((((((-((((((-(((.(((&))).))).)))))).)))))))	ACCUCAG-GAAAGC-GAGAGGA&UCCACUCUGCUUUCUCUGAGGU	2	49.8331	0.402569	3	81.7974	0.429363	49.8331	81.7974	yes
PC-3p-1384_3922	TRINITY_DN119289_c3_g1	180	202	192	-42	-27.8	0.661905	8.5	1-3,202-200;5-8,197-194;10-22,192-180	4-4,199-198[AILt];9-9,193-193[SIL]	(((((((((((((.((((..(((&)))-.)))).)))))))))))))	GCCUUGGAGAAGGAAGAGGAGGA&UCC-ACUCUGCUUUCUCUGAGGU	1	24.9165	0.858795	0	0	NA	24.9165	0	yes
PC-3p-1384_3922	TRINITY_DN120140_c0_g4	407	429	419	-42	-27.9	0.664286	7.5	1-6,429-424;7-18,422-411	x-x,423-423[BULt];19-22,410-407[UP3]	....((((((((((((.((((((&))))))-))))))))))))....	UUCACGGAGAAAGUAGCAGUGGA&UCCACU-CUGCUUUCUCUGAGGU	2	49.8331	0.581351	0	0	NA	49.8331	0	yes
PC-3p-1384_3922	TRINITY_DN121291_c1_g1	205	230	217	-42	-27.9	0.664286	13.5	1-8,230-223;9-18,218-209;20-22,207-205	x-x,222-219[BULt];19-19,208-208[SIL]	(((.((((((((((....((((((((&))))))))----)))))))))).)))	GCUGUAGAGAGAGCUAUGGGGGUGGA&UCCACUCU----GCUUUCUCUGAGGU	2	49.8331	0.319151	0	0	NA	49.8331	0	yes
PC-3p-1384_3922	TRINITY_DN121583_c0_g2	317	339	329	-42	-27.3	0.65	8	1-7,339-333;8-14,331-325;16-21,323-318	x-x,332-332[BULt];15-15,324-324[SIL];22-22,317-317[UP3]	.((((((.(((((((.(((((((&)))))))-))))))).)))))).	UCUUCGGUGAGGGUAUGAGUGGA&UCCACUC-UGCUUUCUCUGAGGU	0	0	NA	2	54.5316	0.443518	0	54.5316	yes
PC-3p-1384_3922	TRINITY_DN94383_c0_g1	854	875	865	-42	-30.9	0.735714	7.5	1-6,875-870;7-14,868-861;16-21,860-855	x-x,869-869[BULt];15-15,x-x[BULq];22-22,854-854[UP3]	.((((((-((((((((.((((((&))))))-)))))))).)))))).	CCCUCAG-GGAGGCGGCGGUGGA&UCCACU-CUGCUUUCUCUGAGGU	0	0	NA	1	27.2658	0.227375	0	27.2658	yes
PC-3p-147239_49	TRINITY_DN105847_c0_g1	841	866	857	-42.3	-27.5	0.650118	13.5	4-5,863-862;7-11,860-856;12-16,854-850;17-23,848-842	1-3,866-864[UP5];6-6,861-861[SIL];x-x,855-855[BULt];x-x,849-849[BULt];24-24,841-841[UP3]	.(((((((.(((((.(((((.((...&...)).)))))-)))))-))))))).	AAUCCCCACCAUGCGGCACCGGUUCC&AAUAUGGGUGU-GUAUG-UGGGGAUA	0	0	NA	1	27.2658	0.977739	0	27.2658	yes
PC-3p-147239_49	TRINITY_DN109605_c0_g1	8	31	22	-42.3	-27.5	0.650118	8.5	2-8,30-24;11-20,21-12;23-24,9-8	1-1,31-31[UP5];9-10,23-22[SIL];21-22,11-10[SIL]	((..((((((((((..(((((((.&.)))))))..))))))))))..))	UAUACCCACAUGCAGCCCUAUAUA&AAUAUGGGUGUGUAUGUGGGGAUA	1	24.9165	0.990249	0	0	NA	24.9165	0	yes
PC-3p-147239_49	TRINITY_DN110286_c1_g2	258	282	272	-42.3	-28.5	0.673759	14.5	5-6,278-277;7-11,275-271;13-23,269-259	1-4,282-279[UP5];x-x,276-276[BULt];12-12,270-270[SIL];24-24,258-258[UP3]	.(((((((((((.(((((.((....&....))-))))).))))))))))).	GGUUCCCACAUGGGCACCACAAGCC&AAUAUG-GGUGUGUAUGUGGGGAUA	1	24.9165	0.895514	0	0	NA	24.9165	0	yes
PC-3p-147239_49	TRINITY_DN111069_c1_g1	200	224	215	-42.3	-27.9	0.659574	11	5-13,220-212;15-16,210-209;17-24,207-200	1-4,224-221[UP5];14-14,211-211[SIL];x-x,208-208[BULt]	((((((((.((.(((((((((....&....))))))))).))-))))))))	UGUCCCCAUCGAACACAUCCAGCCA&AAUAUGGGUGUGUAUG-UGGGGAUA	1	24.9165	0.978502	0	0	NA	24.9165	0	yes
PC-3p-147239_49	TRINITY_DN90263_c0_g1	891	915	905	-42.3	-29.1	0.687943	8.5	3-9,913-907;10-15,905-900;17-22,898-893	1-2,915-914[UP5];x-x,906-906[BULt];16-16,899-899[SIL];23-24,892-891[UP3]	..((((((.((((((.(((((((..&..)))))))-)))))).))))))..	AUUCUCCAGAUACACUACCCAUAAU&AAUAUGGGU-GUGUAUGUGGGGAUA	0	0	NA	1	27.2658	0.733413	0	27.2658	yes
PC-3p-147239_49	TRINITY_DN96502_c4_g1	677	700	691	-42.3	-31.9	0.754137	11	5-13,696-688;15-22,686-679	1-4,700-697[UP5];14-14,687-687[SIL];23-24,678-677[UP3]	..((((((((.(((((((((....&....))))))))).))))))))..	CCUCCCCACAAACACACCCGCGCC&AAUAUGGGUGUGUAUGUGGGGAUA	0	0	NA	1	27.2658	0.121009	0	27.2658	yes
PC-3p-147239_49	TRINITY_DN99463_c1_g1	227	251	243	-42.3	-28	0.661939	9.5	1-8,251-244;10-14,243-239;15-19,237-233;20-22,231-229	9-9,x-x[BULq];x-x,238-238[BULt];x-x,232-232[BULt];23-24,228-227[UP3]	..(((.(((((.(((((-((((((((&)))))))).)))))-)))))-)))..	GUUCCACCACAUUGCGC-CCCGUGUU&AAUAUGGGUGUGUA-UGUGG-GGAUA	0	0	NA	4	109.063	0.826419	0	109.063	yes
PC-3p-153871_47	TRINITY_DN105753_c0_g2	1410	1433	1424	-36.9	-24.7	0.669377	8	2-11,1432-1423;13-14,1421-1420;15-21,1417-1411	1-1,1433-1433[UP5];12-12,1422-1422[SIL];x-x,1419-1418[BULt];22-22,1410-1410[UP3]	.(((((((..((.((((((((((.&.)))))))))).))--))))))).	GAAGUUGGCUGGUCUUGUGAGCCC&UGGCUCAUAAGUCU--CUAACUUG	0	0	NA	1	27.2658	0.686774	0	27.2658	yes
PC-3p-153871_47	TRINITY_DN110261_c1_g5	1113	1134	1125	-36.9	-24.2	0.655827	8.5	2-4,1133-1131;7-19,1128-1116	1-1,1134-1134[UP5];5-6,1130-1129[SIL];20-22,1115-1113[UP3]	...(((((((((((((..(((.&.)))..)))))))))))))...	AAUGUUAGGGACUUAUUUGCCG&UGGCUCAUAAGUCUCUAACUUG	2	49.8331	0.697209	2	54.5316	0.68678	49.8331	54.5316	yes
PC-3p-153871_47	TRINITY_DN110270_c0_g3	381	402	392	-36.9	-24.1	0.653117	6	1-8,402-395;9-16,393-386;19-22,384-381	x-x,394-394[BULt];17-18,385-385[AILq]	((((.-((((((((.((((((((&))))))))-))))))))..))))	CAAGA-AGAGGCUUGAUGAGCUA&UGGCUCAU-AAGUCUCUAACUUG	1	24.9165	0.919719	0	0	NA	24.9165	0	yes
PC-3p-153871_47	TRINITY_DN117322_c0_g1	1274	1296	1287	-36.9	-24.7	0.669377	7.5	1-12,1296-1285;13-19,1283-1277	x-x,1284-1284[BULt];20-22,1276-1274[UP3]	...(((((((.((((((((((((&))))))))))))-)))))))...	UCCGUUGGAGCAUUUAUGAGUCA&UGGCUCAUAAGU-CUCUAACUUG	1	24.9165	0.760813	3	81.7974	0.526529	24.9165	81.7974	yes
PC-3p-153871_47	TRINITY_DN120882_c0_g2	1267	1290	1281	-36.9	-25.5	0.691057	7	1-8,1290-1283;10-16,1281-1275;17-20,1272-1269	9-9,1282-1282[SIL];x-x,1274-1273[BULt];21-22,1268-1267[UP3]	..((((..(((((((.((((((((&)))))))).)))))))--))))..	GUGGUUUGGGAGACUAAUGAGCCA&UGGCUCAUAAGUCUCU--AACUUG	1	24.9165	0.452461	0	0	NA	24.9165	0	yes
PC-3p-153871_47	TRINITY_DN121660_c0_g1	2663	2685	2675	-36.9	-25.3	0.685637	9.5	2-5,2684-2681;7-8,2679-2678;10-22,2675-2663	1-1,2685-2685[UP5];6-6,2680-2680[SIL];9-9,2677-2676[AILt]	(((((((((((((..((.((((.&.)))).))-.)))))))))))))	CAAGUUGGAGACUAAGUUGGCCU&UGGCUCAU-AAGUCUCUAACUUG	0	0	NA	1	27.2658	0.491937	0	27.2658	yes
PC-3p-1724_3197	TRINITY_DN103074_c1_g2	528	548	539	-34.6	-24.78	0.716185	5	1-14,548-535;18-21,531-528	15-17,534-532[SIL]	((((...((((((((((((((&))))))))))))))...))))	AGCAAAGUGAUGAGUUUACUG&CAGUGAACUUAUCAACGUGCU	0	0	NA	2	54.5316	0.240774	0	54.5316	yes
PC-3p-1724_3197	TRINITY_DN103694_c0_g2	670	691	681	-34.6	-25.3	0.731214	9	3-9,689-683;12-21,679-670	1-2,691-690[UP5];10-11,682-680[AILt]	((((((((((...(((((((..&..)))))))-..))))))))))	AGCACGUUGAACCAGUUCACAA&CAGUGAACU-UAUCAACGUGCU	0	0	NA	5	136.329	0.00514783	0	136.329	yes
PC-3p-1724_3197	TRINITY_DN105991_c1_g1	28	49	40	-34.6	-24.9	0.719653	6.5	1-11,49-39;12-19,37-30	x-x,38-38[BULt];20-21,29-28[UP3]	..((((((((.(((((((((((&)))))))))))-))))))))..	UCCAUGUUGGUUAGGUUCACUG&CAGUGAACUUA-UCAACGUGCU	2	49.8331	0.0881317	1	27.2658	0.32087	49.8331	27.2658	yes
PC-3p-1724_3197	TRINITY_DN106049_c0_g1	420	441	432	-34.6	-24.5	0.708092	6.5	3-8,439-434;10-18,432-424;19-21,422-420	1-2,441-440[UP5];9-9,433-433[SIL];x-x,423-423[BULt]	(((.(((((((((.((((((..&..)))))).)))))))))-)))	AGCUGCGUUGAUAUGUUCACAC&CAGUGAACUUAUCAACGU-GCU	0	0	NA	1	27.2658	0.383489	0	27.2658	yes
PC-3p-1724_3197	TRINITY_DN110744_c2_g2	202	222	213	-34.6	-23.5	0.679191	6	1-16,222-207;18-21,205-202	17-17,206-206[SIL]	((((.((((((((((((((((&)))))))))))))))).))))	GGCGGGUUGGUAAGUUUGUUG&CAGUGAACUUAUCAACGUGCU	0	0	NA	2	54.5316	0.467202	0	54.5316	yes
PC-3p-1724_3197	TRINITY_DN111757_c2_g1	627	648	638	-34.6	-24.5	0.708092	5	1-3,648-646;4-12,644-636;14-21,634-627	x-x,645-645[BULt];13-13,635-635[SIL]	((((((((.(((((((((.(((&)))-))))))))).))))))))	GGCAUGUUCGUAAGUUCAUCUG&CAG-UGAACUUAUCAACGUGCU	0	0	NA	2	54.5316	0.27007	0	54.5316	yes
PC-3p-1724_3197	TRINITY_DN112129_c0_g3	455	475	466	-34.6	-23.9	0.690751	7.5	1-4,475-472;6-7,470-469;9-20,467-456	5-5,471-471[SIL];8-8,468-468[SIL];21-21,455-455[UP3]	.((((((((((((.((.((((&)))).)).)))))))))))).	UGCAUGUUGAUGAUUUGGCUG&CAGUGAACUUAUCAACGUGCU	0	0	NA	1	27.2658	0.523668	0	27.2658	yes
PC-3p-1724_3197	TRINITY_DN117860_c0_g1	2090	2109	2100	-34.6	-23.3	0.67341	6	1-13,2109-2097;17-20,2094-2091	14-16,2096-2095[AILq];21-21,2090-2090[UP3]	.((((..-(((((((((((((&)))))))))))))...)))).	UGCACUA-GAUGAGUUUACUG&CAGUGAACUUAUCAACGUGCU	1	24.9165	0.760813	0	0	NA	24.9165	0	yes
PC-3p-1724_3197	TRINITY_DN121395_c2_g2	875	892	886	-34.6	-22.6	0.653179	7	2-7,891-886;11-21,885-875	1-1,892-892[UP5];8-10,x-x[BULq]	(((((((((((---((((((.&.))))))...)))))))))))	AGCACGUUGAU---UUCACUU&CAGUGAACUUAUCAACGUGCU	0	0	NA	1	27.2658	0.860119	0	27.2658	yes
PC-3p-1724_3197	TRINITY_DN94476_c0_g1	175	197	188	-34.6	-24	0.693642	7.5	1-18,197-180;19-21,177-175	x-x,179-178[BULt]	(((..((((((((((((((((((&))))))))))))))))))--)))	GGUUAAUGUUGGUGGGUUCAUUG&CAGUGAACUUAUCAACGU--GCU	0	0	NA	1	27.2658	0.475288	0	27.2658	yes
PC-3p-1724_3197	TRINITY_DN96463_c1_g4	221	241	232	-34.6	-22.5	0.650289	7.5	1-6,241-236;8-18,234-224;20-21,222-221	7-7,235-235[SIL];19-19,223-223[SIL]	((.(((((((((((.((((((&)))))).))))))))))).))	AGGAUGUUGGUGAGGUUGCUG&CAGUGAACUUAUCAACGUGCU	1	24.9165	0.928292	0	0	NA	24.9165	0	yes
PC-3p-211825_29	TRINITY_DN103833_c7_g1	605	627	618	-40.5	-26.9	0.664198	8	2-8,626-620;10-16,618-612;17-20,609-606	1-1,627-627[UP5];9-9,619-619[SIL];x-x,611-610[BULt];21-21,605-605[UP3]	.((((..(((((((.(((((((.&.))))))).)))))))--)))).	GGAUUUGCAGCCCGUCCCGGUAU&UUAUCGGGUCGGGUUG--AGUCG	1	24.9165	0.999695	0	0	NA	24.9165	0	yes
PC-3p-211825_29	TRINITY_DN109166_c2_g2	401	421	412	-40.5	-30.1	0.74321	8	4-16,418-406;18-20,404-402	1-3,421-419[UP5];17-17,405-405[SIL];21-21,401-401[UP3]	.(((.(((((((((((((...&...))))))))))))).))).	AGAUCCGACCCGACCCGAAUC&UUAUCGGGUCGGGUUGAGUCG	1	24.9165	0.841913	0	0	NA	24.9165	0	yes
PC-3p-211825_29	TRINITY_DN109897_c0_g1	1	22	13	-40.5	-27.3	0.674074	9.5	4-16,19-7;18-20,4-2	1-3,22-20[UP5];17-17,6-5[AILt];21-21,1-1[UP3]	.(((..(((((((((((((...&...)))))))))))))-.))).	GGAUAAUGACCCGACCCGAAUA&UUAUCGGGUCGGGUUG-AGUCG	1	24.9165	0.99857	2	54.5316	0.767049	24.9165	54.5316	yes
PC-3p-211825_29	TRINITY_DN111277_c0_g2	626	649	640	-40.5	-27.3	0.674074	16.5	6-10,644-640;11-20,636-627	1-5,649-645[UP5];x-x,639-637[BULt];21-21,626-626[UP3]	.((((((((((...(((((.....&.....)))))---)))))))))).	AGACUCGACCCAUUGACCCUCAUU&UUAUCGGGUC---GGGUUGAGUCG	0	0	NA	2	54.5316	0.759115	0	54.5316	yes
PC-3p-211825_29	TRINITY_DN113027_c3_g1	85	105	96	-40.5	-29.7	0.733333	8	4-16,102-90;18-21,88-85	1-3,105-103[UP5];17-17,89-89[SIL]	((((.(((((((((((((...&...))))))))))))).))))	UGACCCGACCUGACCCGAGAG&UUAUCGGGUCGGGUUGAGUCG	1	24.9165	0.903092	0	0	NA	24.9165	0	yes
PC-3p-211825_29	TRINITY_DN117423_c0_g1	461	483	472	-40.5	-30.3	0.748148	7.5	1-6,483-478;7-21,475-461	x-x,477-476[BULt]	(((((((((((((((..((((((&))))))--)))))))))))))))	CGAUUCAACCUGACCAAUGAUGA&UUAUCG--GGUCGGGUUGAGUCG	0	0	NA	1	27.2658	0.780308	0	27.2658	yes
PC-3p-211825_29	TRINITY_DN118737_c0_g1	284	304	295	-40.5	-26.6	0.65679	9	3-13,302-292;15-17,290-288;19-21,286-284	1-2,304-303[UP5];14-14,291-291[SIL];18-18,287-287[SIL]	(((.(((.(((((((((((..&..))))))))))).))).)))	CGGGUCGUCCUGGCCCGGUUU&UUAUCGGGUCGGGUUGAGUCG	1	24.9165	0.999905	0	0	NA	24.9165	0	yes
PC-3p-211825_29	TRINITY_DN119302_c1_g1	503	523	514	-40.5	-29.7	0.733333	8.5	4-17,520-507;19-21,505-503	1-3,523-521[UP5];18-18,506-506[SIL]	(((.((((((((((((((...&...)))))))))))))).)))	UGAGUCAACUCGGCCCGACUC&UUAUCGGGUCGGGUUGAGUCG	0	0	NA	2	54.5316	0.399962	0	54.5316	yes
PC-3p-211825_29	TRINITY_DN120299_c1_g1	521	540	531	-40.5	-28.4	0.701235	3.5	2-16,539-525;18-18,523-523;20-21,522-521	1-1,540-540[UP5];17-17,524-524[SIL];19-19,x-x[BULq]	((-(.(((((((((((((((.&.))))))))))))))).).))	CG-CACAAUCCGACCCGAUAU&UUAUCGGGUCGGGUUGAGUCG	0	0	NA	3	81.7974	0.8602	0	81.7974	yes
PC-3p-211825_29	TRINITY_DN120370_c0_g1	715	735	726	-40.5	-27.8	0.68642	9.5	3-7,733-729;10-17,726-719;19-21,717-715	1-2,735-734[UP5];8-9,728-727[SIL];18-18,718-718[SIL]	(((.((((((((..(((((..&..)))))..)))))))).)))	CGAGUCGACCCGGACCGGUUC&UUAUCGGGUCGGGUUGAGUCG	0	0	NA	1	27.2658	0.986276	0	27.2658	yes
PC-3p-211825_29	TRINITY_DN120580_c0_g1	723	743	734	-40.5	-28.2	0.696296	7	1-12,743-732;14-17,730-727;19-21,725-723	13-13,731-731[SIL];18-18,726-726[SIL]	(((.((((.((((((((((((&)))))))))))).)))).)))	CGGGUCGGGUCGACCCGGUGG&UUAUCGGGUCGGGUUGAGUCG	0	0	NA	1	27.2658	0.970244	0	27.2658	yes
PC-3p-211825_29	TRINITY_DN122224_c0_g3	399	425	410	-40.5	-26.8	0.661728	13.5	1-6,425-420;7-9,414-412;10-20,410-400	x-x,419-415[BULt];x-x,411-411[BULt];21-21,399-399[UP3]	.(((((((((((.(((.....((((((&))))))-----)))-))))))))))).	GGAUUCAACCCGAACCACCUUCGAUAA&UUAUCG-----GGU-CGGGUUGAGUCG	1	24.9165	0.999774	0	0	NA	24.9165	0	yes
PC-3p-211825_29	TRINITY_DN94253_c0_g1	99	120	111	-40.5	-26.5	0.654321	9.5	4-9,117-112;11-11,110-110;12-21,108-99	1-3,120-118[UP5];10-10,111-111[SIL];x-x,109-109[BULt]	((((((((((.(.((((((...&...)))))).)-))))))))))	CGAUUCAACCGCUACCCGAACU&UUAUCGGGUCG-GGUUGAGUCG	1	24.9165	0.999944	0	0	NA	24.9165	0	yes
PC-3p-211825_29	TRINITY_DN98902_c4_g1	114	138	129	-40.5	-31	0.765432	6	1-14,138-125;15-19,120-116	x-x,124-121[BULt];20-21,115-114[UP3]	..(((((....((((((((((((((&))))))))))))))----)))))..	UCACUCAUCCUACCCGACCCGAUAA&UUAUCGGGUCGGGU----UGAGUCG	1	24.9165	0.751638	0	0	NA	24.9165	0	yes
PC-3p-24362_337	TRINITY_DN101397_c0_g2	726	747	738	-38.6	-25.1	0.650259	8.5	3-4,745-744;6-8,742-740;10-21,738-727	1-2,747-746[UP5];5-5,743-743[SIL];9-9,739-739[SIL];22-22,726-726[UP3]	.((((((((((((.(((.((..&..)).))).)))))))))))).	AAGCUCGUGAACACGGAGUCAU&UCGAAUCCUUGUUCAUGAGCUC	0	0	NA	3	81.7974	0.8602	0	81.7974	yes
PC-3p-24362_337	TRINITY_DN106332_c1_g4	323	345	336	-38.6	-31.1	0.805699	5	1-4,345-342;6-12,340-334;13-22,332-323	5-5,341-341[SIL];x-x,333-333[BULt]	((((((((((.(((((((.((((&)))).)))))))-))))))))))	GGGCUCAUGGUACAAGGAAUCGA&UCGAAUCCUUGU-UCAUGAGCUC	0	0	NA	3	81.7974	0.0573179	0	81.7974	yes
PC-3p-24362_337	TRINITY_DN106728_c0_g2	399	430	411	-38.6	-25.8	0.668394	23.5	1-4,430-427;5-9,421-417;10-22,411-399	x-x,426-422[BULt];x-x,416-412[BULt]	(((((((((((((.....(((((.....((((&))))-----)))))-----)))))))))))))	GAGCUUAUGAGCAACCAUGGGGUAGAUCUCGA&UCGA-----AUCCU-----UGUUCAUGAGCUC	6	149.499	0.664947	0	0	NA	149.499	0	yes
PC-3p-24362_337	TRINITY_DN109858_c0_g1	554	579	569	-38.6	-25.4	0.658031	10	1-2,579-578;5-16,574-563;17-22,559-554	3-4,577-575[AILt];x-x,562-560[BULt]	((((((...((((((((((((...((&))-..))))))))))))---))))))	GAGCUUUUGGUGAACAAGGAUCCAGA&UC-GAAUCCUUGUUCAU---GAGCUC	2	49.8331	0.747655	0	0	NA	49.8331	0	yes
PC-3p-24362_337	TRINITY_DN110590_c1_g1	1422	1444	1434	-38.6	-26.8	0.694301	5	2-4,1443-1441;5-15,1439-1429;17-21,1427-1423	1-1,1444-1444[UP5];x-x,1440-1440[BULt];16-16,1428-1428[SIL];22-22,1422-1422[UP3]	.(((((.(((((((((((.(((.&.)))-))))))))))).))))).	UAGCUCCUGAACAAGGAUAUCGU&UCGA-AUCCUUGUUCAUGAGCUC	4	99.6661	0.421162	8	218.126	0.412122	99.6661	218.126	yes
PC-3p-24362_337	TRINITY_DN112362_c4_g5	221	243	233	-38.6	-25.1	0.650259	5.5	1-6,243-238;7-7,236-236;9-16,234-227;18-22,225-221	x-x,237-237[BULt];8-8,235-235[SIL];17-17,226-226[SIL]	(((((.((((((((.(.((((((&))))))-).)))))))).)))))	GGGCUGAUGAACAAUGCAUUCGA&UCGAAU-CCUUGUUCAUGAGCUC	3	74.7496	0.507038	0	0	NA	74.7496	0	yes
PC-3p-24362_337	TRINITY_DN121336_c1_g1	568	590	580	-38.6	-28.5	0.738342	7.5	2-5,589-586;6-10,584-580;12-22,578-568	1-1,590-590[UP5];x-x,585-585[BULt];11-11,579-579[SIL]	(((((((((((.(((((.((((.&.))))-))))).)))))))))))	GAGUUCAUGAGGGAGGAGUUCGC&UCGAA-UCCUUGUUCAUGAGCUC	3	74.7496	0.183308	0	0	NA	74.7496	0	yes
PC-3p-24362_337	TRINITY_DN121694_c3_g1	608	629	620	-38.6	-28.38	0.735233	9	1-3,629-627;7-22,623-608	4-6,626-624[SIL]	((((((((((((((((...(((&)))...))))))))))))))))	GAGCUCGUGGAUAAGGUUGUGA&UCGAAUCCUUGUUCAUGAGCUC	1	24.9165	0.339062	1	27.2658	0.298615	24.9165	27.2658	yes
PC-3p-24362_337	TRINITY_DN123214_c1_g1	584	602	594	-38.6	-25.3	0.65544	7	1-9,602-594;12-17,593-588;19-22,587-584	10-11,x-x[BULq];18-18,x-x[BULq]	((((-((((((--(((((((((&)))))))))..)))))).))))	GAGC-CGUGGA--GGGAUUCGA&UCGAAUCCUUGUUCAUGAGCUC	9	224.249	0.0428385	4	109.063	0.775826	224.249	109.063	yes
PC-3p-24362_337	TRINITY_DN92724_c0_g3	788	810	802	-38.6	-25.3	0.65544	11	1-2,810-809;6-11,806-801;12-22,798-788	3-5,808-807[AILq];x-x,800-799[BULt]	(((((((((((..((((((..-((&))...))))))--)))))))))))	GAGCUCGUGAAAUCAAGGAGA-GG&UCGAAUCCUUG--UUCAUGAGCUC	0	0	NA	1	27.2658	0.905002	0	27.2658	yes
PC-3p-24362_337	TRINITY_DN95008_c0_g1	310	333	322	-38.6	-25.3	0.65544	9	2-4,332-330;5-8,328-325;9-16,323-316;18-22,314-310	1-1,333-333[UP5];x-x,329-329[BULt];x-x,324-324[BULt];17-17,315-315[SIL]	(((((.((((((((.((((.(((.&.)))-))))-)))))))).)))))	GGGCUGGUGAACAGCGGGUCUCGU&UCGA-AUCC-UUGUUCAUGAGCUC	1	24.9165	0.950787	0	0	NA	24.9165	0	yes
PC-3p-24362_337	TRINITY_DN95285_c0_g4	205	232	223	-38.6	-25.3	0.65544	11.5	3-13,230-220;14-18,214-210;19-22,208-205	1-2,232-231[UP5];x-x,219-215[BULt];x-x,209-209[BULt]	((((.(((((.....(((((((((((..&..)))))))))))-----)))))-))))	GAGCAUCAUGUUGGAGACAGGGGUUCUU&UCGAAUCCUUGUU-----CAUGA-GCUC	0	0	NA	3	81.7974	0.800788	0	81.7974	yes
PC-3p-24362_337	TRINITY_DN95988_c0_g3	910	937	928	-38.6	-25.4	0.658031	13.5	3-4,935-934;6-15,932-923;16-22,916-910	1-2,937-936[UP5];5-5,933-933[SIL];x-x,922-917[BULt]	(((((((......((((((((((.((..&..)).))))))))))------)))))))	GAGCUCGACUCCUUGAGCGAGGAGUCAU&UCGAAUCCUUGUUCA------UGAGCUC	11	274.082	0.737225	14	381.721	0.72708	274.082	381.721	yes
PC-3p-24362_337	TRINITY_DN97350_c1_g1	59	82	73	-38.6	-27	0.699482	8	2-12,81-71;14-20,68-62;21-22,60-59	1-1,82-82[UP5];13-13,70-69[AILt];x-x,61-61[BULt]	((.(((((((..(((((((((((.&.)))))))))))-.)))))))-))	GAUGCUCAUGUUGCGAGGAUUUGU&UCGAAUCCUUGU-UCAUGAGC-UC	1	24.9165	0.5793	0	0	NA	24.9165	0	yes
PC-3p-24362_337	TRINITY_DN98823_c0_g1	1235	1258	1248	-38.6	-25.2	0.65285	10	1-3,1258-1256;5-15,1253-1243;17-20,1240-1237	4-4,1255-1254[AILt];16-16,1242-1241[AILt];21-22,1236-1235[UP3]	..((((..(((((((((((..(((&)))-.)))))))))))-.))))..	AUGCUCUUUGAGCGAGGAUGACGA&UCG-AAUCCUUGUUCA-UGAGCUC	1	24.9165	0.960737	2	54.5316	0.815865	24.9165	54.5316	yes
PC-3p-24598_334	TRINITY_DN111822_c0_g1	2259	2282	2273	-42.4	-27.8	0.65566	7.5	1-16,2282-2267;17-19,2265-2263	x-x,2266-2266[BULt];20-23,2262-2259[UP3]	....(((.((((((((((((((((&))))))))))))))))-)))....	UUGACGAUUGCUGCUUCUCUUGCA&UGUGAGAGAAGCAGCA-UUGAGAG	2	49.8331	0.564048	0	0	NA	49.8331	0	yes
PC-3p-24598_334	TRINITY_DN115442_c0_g1	1364	1387	1378	-42.4	-29.5	0.695755	8.5	2-3,1386-1385;6-16,1382-1372;17-22,1370-1365	1-1,1387-1387[UP5];4-5,1384-1383[SIL];x-x,1371-1371[BULt];23-23,1364-1364[UP3]	.((((((.(((((((((((..((.&.))..)))))))))))-)))))).	GUCUCAGCUGCUGCUUCUCAAGCU&UGUGAGAGAAGCAGCA-UUGAGAG	0	0	NA	2	54.5316	0.225688	0	54.5316	yes
PC-3p-24598_334	TRINITY_DN98702_c4_g1	346	371	359	-42.4	-29.5	0.695755	9.5	1-9,371-363;10-15,359-354;18-23,351-346	x-x,362-360[BULt];16-17,353-352[SIL]	((((((..((((((...(((((((((&)))))))))---))))))..))))))	CUCUCACCGUUGCUAGAUCUCUCGCA&UGUGAGAGA---AGCAGCAUUGAGAG	1	24.9165	0.339062	0	0	NA	24.9165	0	yes
PC-3p-251522_22	TRINITY_DN102676_c0_g1	2848	2870	2859	-34.1	-22.7	0.665689	12	4-6,2867-2865;7-10,2862-2859;12-21,2857-2848	1-3,2870-2868[UP5];x-x,2864-2863[BULt];11-11,2858-2858[SIL]	((((((((((.((((..(((...&...)))--)))).))))))))))	AGGUGCAUCCUUCCAGCUCCCAA&AAUGGA--UGGAUGGAUGCAUUU	3	74.7496	0.990885	0	0	NA	74.7496	0	yes
PC-3p-251522_22	TRINITY_DN104287_c3_g3	844	864	855	-34.1	-22.5	0.659824	11	4-9,861-856;11-18,854-847	1-3,864-862[UP5];10-10,855-855[SIL];19-21,846-844[UP3]	...((((((((.((((((...&...)))))).))))))))...	UAUUGCAUCCAACCAUCUUCA&AAUGGAUGGAUGGAUGCAUUU	0	0	NA	1	27.2658	0.999793	0	27.2658	yes
PC-3p-251522_22	TRINITY_DN106316_c2_g2	844	864	855	-34.1	-22.7	0.665689	7	2-12,863-853;14-21,851-844	1-1,864-864[UP5];13-13,852-852[SIL]	((((((((.(((((((((((.&.))))))))))).))))))))	AGGUGCAUGUAUUUAUCCGUC&AAUGGAUGGAUGGAUGCAUUU	1	24.9165	0.999871	0	0	NA	24.9165	0	yes
PC-3p-251522_22	TRINITY_DN109608_c0_g3	770	791	782	-34.1	-23	0.674487	11	4-11,788-781;12-21,779-770	1-3,791-789[UP5];x-x,780-780[BULt]	((((((((((.((((((((...&...))))))))-))))))))))	GGAUGCAUCCAAUCUGUCUGCU&AAUGGAUGGAU-GGAUGCAUUU	1	24.9165	0.99857	0	0	NA	24.9165	0	yes
PC-3p-251522_22	TRINITY_DN110565_c2_g1	125	145	136	-34.1	-23.2	0.680352	10.5	4-7,142-139;9-20,137-126	1-3,145-143[UP5];8-8,138-138[SIL];21-21,125-125[UP3]	.((((((((((((.((((...&...)))).)))))))))))).	UAGUGCAUCCAUUAGUCCUGC&AAUGGAUGGAUGGAUGCAUUU	1	24.9165	0.996601	0	0	NA	24.9165	0	yes
PC-3p-251522_22	TRINITY_DN110899_c0_g1	166	185	176	-34.1	-22.5	0.659824	6.5	3-12,183-174;14-19,173-168	1-2,185-184[UP5];13-13,x-x[BULq];20-21,167-166[UP3]	..((((((-((((((((((..&..)))))))))).))))))..	GUAUGUAU-CAUCCAUCCAGA&AAUGGAUGGAUGGAUGCAUUU	0	0	NA	1	27.2658	0.999748	0	27.2658	yes
PC-3p-251522_22	TRINITY_DN112529_c1_g1	134	154	145	-34.1	-25.1	0.73607	9	3-14,152-141;16-17,139-138	1-2,154-153[UP5];15-15,140-140[SIL];18-21,137-134[UP3]	....((.((((((((((((..&..)))))))))))).))....	GAAAGCCUCCAUCCGUCCAGA&AAUGGAUGGAUGGAUGCAUUU	1	24.9165	0.786357	0	0	NA	24.9165	0	yes
PC-3p-251522_22	TRINITY_DN113163_c3_g2	1123	1142	1134	-34.1	-22.8	0.668622	9.5	3-9,1140-1134;11-17,1133-1127	1-2,1142-1141[UP5];10-10,x-x[BULq];18-21,1126-1123[UP3]	....(((((((-(((((((..&..))))))).)))))))....	AUCAGUAUCCA-CCAUCCAGG&AAUGGAUGGAUGGAUGCAUUU	1	24.9165	0.999706	0	0	NA	24.9165	0	yes
PC-3p-251522_22	TRINITY_DN114159_c1_g1	240	259	251	-34.1	-23.1	0.677419	5	2-9,258-251;11-15,250-246;17-21,244-240	1-1,259-259[UP5];10-10,x-x[BULq];16-16,245-245[SIL]	(((((.(((((-((((((((.&.)))))))).))))).)))))	GAAUGGAUUCA-CCAUCCAUA&AAUGGAUGGAUGGAUGCAUUU	0	0	NA	1	27.2658	0.99511	0	27.2658	yes
PC-3p-251522_22	TRINITY_DN115058_c0_g1	736	756	747	-34.1	-22.5	0.659824	10	2-18,755-739	1-1,756-756[UP5];19-21,738-736[UP3]	...(((((((((((((((((.&.)))))))))))))))))...	AGUUGCAUCCGUUUGUUCGUG&AAUGGAUGGAUGGAUGCAUUU	3	74.7496	0.994724	1	27.2658	0.999764	74.7496	27.2658	yes
PC-3p-251522_22	TRINITY_DN115774_c1_g2	271	293	284	-34.1	-23.5	0.68915	9.5	2-6,292-288;8-11,286-283;12-21,280-271	1-1,293-293[UP5];7-7,287-287[SIL];x-x,282-281[BULt]	((((((((((..((((.(((((.&.))))).))))--))))))))))	AAAUGCGUCUUUGUCCUUCCAUA&AAUGGAUGGAU--GGAUGCAUUU	0	0	NA	1	27.2658	0.980433	0	27.2658	yes
PC-3p-251522_22	TRINITY_DN116194_c0_g2	1384	1408	1399	-34.1	-22.8	0.668622	11	4-14,1405-1395;15-21,1390-1384	1-3,1408-1406[UP5];x-x,1394-1391[BULt]	(((((((....(((((((((((...&...)))))))))))----)))))))	GAAUGUAAUUUUCCAUCCAUCUGCA&AAUGGAUGGAUGGA----UGCAUUU	0	0	NA	2	54.5316	0.838838	0	54.5316	yes
PC-3p-251522_22	TRINITY_DN116733_c0_g1	645	665	656	-34.1	-22.3	0.653959	9	2-3,664-663;5-14,661-652;16-21,650-645	1-1,665-665[UP5];4-4,662-662[SIL];15-15,651-651[SIL]	((((((.((((((((((.((.&.)).)))))))))).))))))	AGGUGCUUCCGUCUAUUGGUA&AAUGGAUGGAUGGAUGCAUUU	0	0	NA	1	27.2658	0.999945	0	27.2658	yes
PC-3p-251522_22	TRINITY_DN118823_c0_g1	1	21	12	-34.1	-22.6	0.662757	8	2-7,20-15;9-13,13-9;15-17,7-5	1-1,21-21[UP5];8-8,14-14[SIL];14-14,8-8[SIL];18-21,4-1[UP3]	....(((.(((((.((((((.&.)))))).))))).)))....	CUAAGCAGCCAUCGAUCCAUG&AAUGGAUGGAUGGAUGCAUUU	1	24.9165	0.99993	0	0	NA	24.9165	0	yes
PC-3p-251522_22	TRINITY_DN122099_c3_g2	771	791	782	-34.1	-25.1	0.73607	9.5	4-10,788-782;12-20,780-772	1-3,791-789[UP5];11-11,781-781[SIL];21-21,771-771[UP3]	.(((((((((.(((((((...&...))))))).))))))))).	CAGUGCAUCCUUCUAUCCUUG&AAUGGAUGGAUGGAUGCAUUU	0	0	NA	1	27.2658	0.757994	0	27.2658	yes
PC-3p-251522_22	TRINITY_DN122399_c0_g2	221	242	232	-34.1	-23.3	0.683284	10	3-6,240-237;8-19,234-223	1-2,242-241[UP5];7-7,236-235[AILt];20-21,222-221[UP3]	..((((((((((((..((((..&..))))-.))))))))))))..	GUAUGCAUCCAUCCCUUUCAGA&AAUGGA-UGGAUGGAUGCAUUU	2	49.8331	0.669489	0	0	NA	49.8331	0	yes
PC-3p-251522_22	TRINITY_DN123495_c2_g1	366	386	377	-34.1	-23	0.674487	9	5-12,382-375;14-21,373-366	1-4,386-383[UP5];13-13,374-374[SIL]	((((((((.((((((((....&....)))))))).))))))))	AAGUGUAUGCAUCCAUCAUCU&AAUGGAUGGAUGGAUGCAUUU	1	24.9165	0.998942	2	54.5316	0.97215	24.9165	54.5316	yes
PC-3p-251522_22	TRINITY_DN123920_c1_g1	91	111	102	-34.1	-22.2	0.651026	11	4-16,108-96	1-3,111-109[UP5];17-21,95-91[UP3]	.....(((((((((((((...&...))))))))))))).....	AUCACCAUCCAUCUAUCCUUC&AAUGGAUGGAUGGAUGCAUUU	2	49.8331	0.222898	0	0	NA	49.8331	0	yes
PC-3p-251522_22	TRINITY_DN123920_c1_g3	156	176	167	-34.1	-22.2	0.651026	11	4-16,173-161	1-3,176-174[UP5];17-21,160-156[UP3]	.....(((((((((((((...&...))))))))))))).....	AUCACCAUCCAUCUAUCCUUC&AAUGGAUGGAUGGAUGCAUUU	1	24.9165	0.999995	0	0	NA	24.9165	0	yes
PC-3p-251522_22	TRINITY_DN95031_c0_g1	264	282	274	-34.1	-23.2	0.680352	5.5	1-6,282-277;8-10,276-274;12-21,273-264	7-7,x-x[BULq];11-11,x-x[BULq]	((((((((((-(((-((((((&)))))).))).))))))))))	AGAUGCAUCU-UCC-UCCAUU&AAUGGAUGGAUGGAUGCAUUU	2	49.8331	0.954867	0	0	NA	49.8331	0	yes
PC-3p-251522_22	TRINITY_DN96526_c2_g1	120	140	131	-34.1	-24.6	0.721408	10	4-16,137-125	1-3,140-138[UP5];17-21,124-120[UP3]	.....(((((((((((((...&...))))))))))))).....	UUCUUCAUCCAUCCAUCCGAA&AAUGGAUGGAUGGAUGCAUUU	1	24.9165	0.869036	0	0	NA	24.9165	0	yes
PC-3p-251522_22	TRINITY_DN97062_c0_g3	147	167	158	-34.1	-23.7	0.695015	9.5	4-8,164-160;10-20,158-148	1-3,167-165[UP5];9-9,159-159[SIL];21-21,147-147[UP3]	.(((((((((((.(((((...&...))))).))))))))))).	UAAUGCAUUCAUGCGUCCUGU&AAUGGAUGGAUGGAUGCAUUU	1	24.9165	0.986822	2	54.5316	0.895928	24.9165	54.5316	yes
PC-3p-251522_22	TRINITY_DN99790_c0_g3	611	632	623	-34.1	-25.1	0.73607	6	1-13,632-620;14-17,618-615	x-x,619-619[BULt];18-21,614-611[UP3]	....((((.(((((((((((((&)))))))))))))-))))....	UCUGGCAUACCAUCCAUUCAUU&AAUGGAUGGAUGG-AUGCAUUU	1	24.9165	0.79425	0	0	NA	24.9165	0	yes
PC-3p-268483_20	TRINITY_DN102071_c1_g1	1013	1036	1027	-34.1	-25.8	0.756598	8	2-11,1035-1026;13-23,1024-1014	1-1,1036-1036[UP5];12-12,1025-1025[SIL];24-24,1013-1013[UP3]	.(((((((((((.((((((((((.&.)))))))))).))))))))))).	UGAAUGAGGAGGAUGAGGAGGAAG&AUUUUUUCUCACCCUUCUCAUUUU	2	49.8331	0.671663	1	27.2658	0.83026	49.8331	27.2658	yes
PC-3p-268483_20	TRINITY_DN102733_c1_g2	1346	1369	1360	-34.1	-22.4	0.656891	13	2-10,1368-1360;13-19,1357-1351	1-1,1369-1369[UP5];11-12,1359-1358[SIL];20-24,1350-1346[UP3]	.....(((((((..(((((((((.&.)))))))))..))))))).....	AACUAGAGAAGGAGGAGGAAGAGC&AUUUUUUCUCACCCUUCUCAUUUU	0	0	NA	1	27.2658	1	0	27.2658	yes
PC-3p-268483_20	TRINITY_DN104280_c1_g1	1038	1062	1053	-34.1	-22.4	0.656891	12.5	4-8,1059-1055;10-10,1053-1053;11-22,1051-1040	1-3,1062-1060[UP5];9-9,1054-1054[SIL];x-x,1052-1052[BULt];23-24,1039-1038[UP3]	..((((((((((((.(.(((((...&...))))).)-))))))))))))..	ACAAUGAGAGGGGUCGUGAAGAUAG&AUUUUUUCUC-ACCCUUCUCAUUUU	0	0	NA	1	27.2658	1	0	27.2658	yes
PC-3p-268483_20	TRINITY_DN104920_c2_g1	323	346	337	-34.1	-22.6	0.662757	10	2-11,345-336;13-19,334-328	1-1,346-346[UP5];12-12,335-335[SIL];20-24,327-323[UP3]	.....(((((((.((((((((((.&.)))))))))).))))))).....	UUAAAGAGAAGGUUGAGGAGAAAC&AUUUUUUCUCACCCUUCUCAUUUU	1	24.9165	1	0	0	NA	24.9165	0	yes
PC-3p-268483_20	TRINITY_DN105404_c3_g2	519	547	538	-34.1	-23.5	0.68915	15	4-15,544-533;16-22,527-521	1-3,547-545[UP5];x-x,532-528[BULt];23-24,520-519[UP3]	..(((((((.....((((((((((((...&...))))))))))))-----)))))))..	AUAAUGAGAGAGAGAGGGUGAGAGGGUGA&AUUUUUUCUCACCCU-----UCUCAUUUU	1	24.9165	0.999833	0	0	NA	24.9165	0	yes
PC-3p-268483_20	TRINITY_DN105795_c0_g1	448	474	463	-34.1	-22.4	0.656891	14	4-8,471-467;9-18,464-455;19-24,453-448	1-3,474-472[UP5];x-x,466-465[BULt];x-x,454-454[BULt]	((((((.((((((((((..(((((...&...)))))--))))))))))-))))))	GAAGUGAAGAAGGGUGGUUGGAGAUCA&AUUUUUUC--UCACCCUUCU-CAUUUU	0	0	NA	1	27.2658	1	0	27.2658	yes
PC-3p-268483_20	TRINITY_DN106267_c1_g1	798	821	812	-34.1	-23	0.674487	12.5	4-18,818-804	1-3,821-819[UP5];19-24,803-798[UP3]	......(((((((((((((((...&...)))))))))))))))......	UUCGGAAGGAGGGUGGGAAAAUUC&AUUUUUUCUCACCCUUCUCAUUUU	1	24.9165	0.999993	0	0	NA	24.9165	0	yes
PC-3p-268483_20	TRINITY_DN106748_c0_g2	147	170	161	-34.1	-22.3	0.653959	10	2-10,169-161;13-19,158-152;21-24,150-147	1-1,170-170[UP5];11-12,160-159[SIL];20-20,151-151[SIL]	((((.(((((((..(((((((((.&.)))))))))..))))))).))))	AAGAAGAGGAGGAGGAGGAGGAAG&AUUUUUUCUCACCCUUCUCAUUUU	2	49.8331	0.981926	0	0	NA	49.8331	0	yes
PC-3p-268483_20	TRINITY_DN107651_c0_g1	311	334	325	-34.1	-22.3	0.653959	13	2-10,333-325;13-19,322-316	1-1,334-334[UP5];11-12,324-323[SIL];20-24,315-311[UP3]	.....(((((((..(((((((((.&.)))))))))..))))))).....	AGCGAGAGAAGGAGGAGGAGGAAC&AUUUUUUCUCACCCUUCUCAUUUU	2	49.8331	0.999966	0	0	NA	49.8331	0	yes
PC-3p-268483_20	TRINITY_DN108158_c1_g1	318	341	332	-34.1	-23.5	0.68915	13	3-14,339-328;16-19,326-323	1-2,341-340[UP5];15-15,327-327[SIL];20-24,322-318[UP3]	.....((((.((((((((((((..&..)))))))))))).)))).....	UUAAGGAGAUGGGUGGGAGGAGCA&AUUUUUUCUCACCCUUCUCAUUUU	1	24.9165	0.999756	1	27.2658	0.999196	24.9165	27.2658	yes
PC-3p-268483_20	TRINITY_DN108339_c2_g5	144	169	160	-34.1	-22.3	0.653959	12.5	3-12,167-158;13-18,156-151;19-22,149-146	1-2,169-168[UP5];x-x,157-157[BULt];x-x,150-150[BULt];23-24,145-144[UP3]	..((((.((((((.((((((((((..&..))))))))))-))))))-))))..	UUAGUGAAGGGGGUGUGAGAGGAGGA&AUUUUUUCUCAC-CCUUCU-CAUUUU	1	24.9165	1	1	27.2658	1	24.9165	27.2658	yes
PC-3p-268483_20	TRINITY_DN108730_c1_g1	942	965	956	-34.1	-22.3	0.653959	9	3-12,963-954;14-22,952-944	1-2,965-964[UP5];13-13,953-953[SIL];23-24,943-942[UP3]	..(((((((((.((((((((((..&..)))))))))).)))))))))..	AUAAUGAGGGGUGUGAGAAAGGCU&AUUUUUUCUCACCCUUCUCAUUUU	1	24.9165	1	0	0	NA	24.9165	0	yes
PC-3p-268483_20	TRINITY_DN108781_c0_g1	1775	1798	1789	-34.1	-25.2	0.739003	6	2-12,1797-1787;14-22,1785-1777	1-1,1798-1798[UP5];13-13,1786-1786[SIL];23-24,1776-1775[UP3]	..(((((((((.(((((((((((.&.))))))))))).)))))))))..	UUAAUGAGAAGAGUGAGAAGAAGC&AUUUUUUCUCACCCUUCUCAUUUU	1	24.9165	0.930941	0	0	NA	24.9165	0	yes
PC-3p-268483_20	TRINITY_DN109045_c1_g1	919	943	934	-34.1	-25.2	0.739003	10	2-11,942-933;12-19,931-924	1-1,943-943[UP5];x-x,932-932[BULt];20-24,923-919[UP3]	.....((((((((.((((((((((.&.))))))))))-)))))))).....	GGGAAGAGAAGGGCUGAGAAAAGGC&AUUUUUUCUCA-CCCUUCUCAUUUU	1	24.9165	0.93595	0	0	NA	24.9165	0	yes
PC-3p-268483_20	TRINITY_DN110030_c2_g4	135	161	152	-34.1	-24.5	0.718475	12	5-13,157-149;14-24,145-135	1-4,161-158[UP5];x-x,148-146[BULt]	(((((((((((...(((((((((....&....)))))))))---)))))))))))	AGGAUGAGAAGAUAGGUGAGAAGUUGA&AUUUUUUCUCACC---CUUCUCAUUUU	69	1719.24	0.602514	13	354.455	0.633874	1719.24	354.455	yes
PC-3p-268483_20	TRINITY_DN110588_c0_g2	378	402	393	-34.1	-22.4	0.656891	7.5	2-7,401-396;9-16,394-387;17-24,385-378	1-1,402-402[UP5];8-8,395-395[SIL];x-x,386-386[BULt]	((((((((.((((((((.((((((.&.)))))).))))))))-))))))))	GAAGUGGGCGGGGGUGACAAAGAAG&AUUUUUUCUCACCCUU-CUCAUUUU	1	24.9165	1	4	109.063	0.999952	24.9165	109.063	yes
PC-3p-268483_20	TRINITY_DN110642_c2_g2	331	354	345	-34.1	-22.2	0.651026	14.5	4-10,351-345;12-19,343-336	1-3,354-352[UP5];11-11,344-344[SIL];20-24,335-331[UP3]	.....((((((((.(((((((...&...))))))).)))))))).....	UCAAGGAGGAGGGGGAGGAGACCG&AUUUUUUCUCACCCUUCUCAUUUU	2	49.8331	0.99999	1	27.2658	1	49.8331	27.2658	yes
PC-3p-268483_20	TRINITY_DN111025_c0_g1	1210	1233	1224	-34.1	-24.2	0.709677	8.5	3-13,1231-1221;15-24,1219-1210	1-2,1233-1232[UP5];14-14,1220-1220[SIL]	((((((((((.(((((((((((..&..))))))))))).))))))))))	AAGGUGAGGAAGGUGGGAAAGGUC&AUUUUUUCUCACCCUUCUCAUUUU	1	24.9165	0.995577	3	81.7974	0.941179	24.9165	81.7974	yes
PC-3p-268483_20	TRINITY_DN111726_c3_g2	145	168	159	-34.1	-22.2	0.651026	10.5	3-5,166-164;7-11,162-158;13-24,156-145	1-2,168-167[UP5];6-6,163-163[SIL];12-12,157-157[SIL]	((((((((((((.(((((.(((..&..))).))))).))))))))))))	AGGAUGAGGAGGCUGAGGUGAAUG&AUUUUUUCUCACCCUUCUCAUUUU	1	24.9165	1	0	0	NA	24.9165	0	yes
PC-3p-268483_20	TRINITY_DN112040_c1_g1	1188	1211	1202	-34.1	-22.7	0.665689	9	2-10,1210-1202;13-19,1199-1193;21-24,1191-1188	1-1,1211-1211[UP5];11-12,1201-1200[SIL];20-20,1192-1192[SIL]	((((.(((((((..(((((((((.&.)))))))))..))))))).))))	AAGAGGAGGAGGAGGAGGAAGAAG&AUUUUUUCUCACCCUUCUCAUUUU	2	49.8331	0.999613	5	136.329	0.999516	49.8331	136.329	yes
PC-3p-268483_20	TRINITY_DN112579_c0_g2	78	101	92	-34.1	-22.8	0.668622	18.5	8-19,94-83	1-7,101-95[UP5];20-24,82-78[UP3]	.....((((((((((((.......&.......)))))))))))).....	GUAUGGAGGAGGGUGAGUUCUCAG&AUUUUUUCUCACCCUUCUCAUUUU	1	24.9165	0.999999	0	0	NA	24.9165	0	yes
PC-3p-268483_20	TRINITY_DN112957_c1_g1	379	404	395	-34.1	-23.2	0.680352	16.5	7-10,398-395;11-24,392-379	1-6,404-399[UP5];x-x,394-393[BULt]	((((((((((((((..((((......&......))))--))))))))))))))	AGGAUGGGAAGGGUACGAGACUUACA&AUUUUUUCUC--ACCCUUCUCAUUUU	1	24.9165	0.999944	0	0	NA	24.9165	0	yes
PC-3p-268483_20	TRINITY_DN113007_c1_g1	537	560	551	-34.1	-23	0.674487	10	4-10,557-551;12-18,550-544;19-23,542-538	1-3,560-558[UP5];11-11,x-x[BULq];x-x,543-543[BULt];24-24,537-537[UP3]	.(((((.(((((((-(((((((...&...))))))).)))))))-))))).	UGGAUGAAGAAGGG-GAGAAAAUGA&AUUUUUUCUCACCCUUCU-CAUUUU	1	24.9165	0.999994	0	0	NA	24.9165	0	yes
PC-3p-268483_20	TRINITY_DN113248_c0_g1	1609	1632	1624	-34.1	-26.8	0.785924	6.5	1-8,1632-1625;10-17,1624-1617;18-24,1615-1609	9-9,x-x[BULq];x-x,1616-1616[BULt]	(((((((.((((((((-((((((((&)))))))).))))))))-)))))))	GAGAUGAUGGAGGGUG-GAAGAGAU&AUUUUUUCUCACCCUUC-UCAUUUU	1	24.9165	0.651481	0	0	NA	24.9165	0	yes
PC-3p-268483_20	TRINITY_DN113403_c0_g1	634	660	651	-34.1	-23.9	0.70088	9	2-10,659-651;12-17,650-645;18-24,640-634	1-1,660-660[UP5];11-11,x-x[BULq];x-x,644-641[BULt]	(((((((....((((((-(((((((((.&.))))))))).))))))----)))))))	GAGAUGAAAAAGAAGGG-GAGAAGAAAG&AUUUUUUCUCACCCUUC----UCAUUUU	1	24.9165	0.99857	0	0	NA	24.9165	0	yes
PC-3p-268483_20	TRINITY_DN113603_c2_g1	383	407	398	-34.1	-23.2	0.680352	10.5	2-10,406-398;12-17,396-391;18-24,389-383	1-1,407-407[UP5];11-11,397-397[SIL];x-x,390-390[BULt]	(((((((.((((((.(((((((((.&.))))))))).))))))-)))))))	GAGGUGGUGGAGGGGGAGGAGGAGC&AUUUUUUCUCACCCUUC-UCAUUUU	1	24.9165	0.999953	2	54.5316	0.99456	24.9165	54.5316	yes
PC-3p-268483_20	TRINITY_DN113722_c0_g2	773	799	790	-34.1	-22.7	0.665689	14.5	1-11,799-789;12-19,785-778	x-x,788-786[BULt];20-24,777-773[UP3]	.....((((((((...(((((((((((&)))))))))))---)))))))).....	CGUUGGGGAAGGGGAGUGGGGAAAAGU&AUUUUUUCUCA---CCCUUCUCAUUUU	1	24.9165	1	0	0	NA	24.9165	0	yes
PC-3p-268483_20	TRINITY_DN113770_c2_g2	828	852	843	-34.1	-22.8	0.668622	12.5	4-8,849-845;10-17,843-836;18-24,834-828	1-3,852-850[UP5];9-9,844-844[SIL];x-x,835-835[BULt]	(((((((.((((((((.(((((...&...))))).))))))))-)))))))	GGGGUGACGAGGGGUGUGAGGAUGG&AUUUUUUCUCACCCUUC-UCAUUUU	2	49.8331	0.942292	1	27.2658	0.999994	49.8331	27.2658	yes
PC-3p-268483_20	TRINITY_DN113919_c1_g3	337	360	351	-34.1	-22.8	0.668622	10.5	1-13,360-348;15-20,346-341	14-14,347-347[SIL];21-24,340-337[UP3]	....((((((.(((((((((((((&))))))))))))).))))))....	UGUUUGAGGACGGUGGGGAGGAGU&AUUUUUUCUCACCCUUCUCAUUUU	2	49.8331	0.999506	0	0	NA	49.8331	0	yes
PC-3p-268483_20	TRINITY_DN114139_c1_g3	81	112	103	-34.1	-23.1	0.677419	15.5	1-15,112-98;16-21,89-84	x-x,97-90[BULt];22-24,83-81[UP3]	...((((((........(((((((((((((((&)))))))))))))))--------))))))...	UUCAUGGGGAGCCGAUUGGGGUGAGGAAGGAU&AUUUUUUCUCACCCU--------UCUCAUUUU	0	0	NA	1	27.2658	0.999951	0	27.2658	yes
PC-3p-268483_20	TRINITY_DN114912_c0_g2	538	563	552	-34.1	-22.9	0.671554	15.5	5-9,559-555;10-22,552-540	1-4,563-560[UP5];x-x,554-553[BULt];23-24,539-538[UP3]	..(((((((((((((..(((((....&....)))))--)))))))))))))..	GUGGUGAGGAGGGUGCCAGGAACGGG&AUUUUUUCU--CACCCUUCUCAUUUU	0	0	NA	1	27.2658	0.999978	0	27.2658	yes
PC-3p-268483_20	TRINITY_DN115371_c0_g1	797	823	814	-34.1	-23.2	0.680352	13	4-18,820-806;19-22,802-799	1-3,823-821[UP5];x-x,805-803[BULt];23-24,798-797[UP3]	..((((...(((((((((((((((...&...)))))))))))))))---))))..	CUAAUGUACAGAAGGGUGGGGAGACUG&AUUUUUUCUCACCCUUCU---CAUUUU	0	0	NA	1	27.2658	0.999799	0	27.2658	yes
PC-3p-268483_20	TRINITY_DN115613_c0_g1	505	529	519	-34.1	-23.1	0.677419	12	2-9,528-521;12-24,517-505	1-1,529-529[UP5];10-11,520-518[AILt]	(((((((((((((...((((((((.&.))))))))-..)))))))))))))	AGAAUGGGAAGGGGAAAGGGAAGGG&AUUUUUUCU-CACCCUUCUCAUUUU	3	74.7496	0.997835	0	0	NA	74.7496	0	yes
PC-3p-268483_20	TRINITY_DN115652_c0_g1	14	37	28	-34.1	-22.8	0.668622	18.5	8-19,30-19	1-7,37-31[UP5];20-24,18-14[UP3]	.....((((((((((((.......&.......)))))))))))).....	GUAUGGAGGAGGGUGAGUUCUCUG&AUUUUUUCUCACCCUUCUCAUUUU	1	24.9165	0.999999	0	0	NA	24.9165	0	yes
PC-3p-268483_20	TRINITY_DN116713_c0_g1	71	99	90	-34.1	-25	0.733138	15.5	2-10,98-90;11-22,84-73	1-1,99-99[UP5];x-x,89-85[BULt];23-24,72-71[UP3]	..((((((((((((.....(((((((((.&.)))))))))-----))))))))))))..	CUGGUGGGAAGGGUAGUGUGAGAAGAAAG&AUUUUUUCUC-----ACCCUUCUCAUUUU	2	49.8331	0.844784	0	0	NA	49.8331	0	yes
PC-3p-268483_20	TRINITY_DN116930_c0_g1	445	468	459	-34.1	-24.4	0.715543	14.5	7-14,462-455;17-23,452-446	1-6,468-463[UP5];15-16,454-453[SIL];24-24,445-445[UP3]	.(((((((..((((((((......&......))))))))..))))))).	UGAAUGAGUUGGGUGAGACUGCGU&AUUUUUUCUCACCCUUCUCAUUUU	0	0	NA	1	27.2658	0.984387	0	27.2658	yes
PC-3p-268483_20	TRINITY_DN116941_c0_g1	515	541	532	-34.1	-23.3	0.683284	9	3-13,539-529;14-17,527-524;18-24,521-515	1-2,541-540[UP5];x-x,528-528[BULt];x-x,523-522[BULt]	(((((((..((((.(((((((((((..&..)))))))))))-))))--)))))))	AAAAUGGGUGAGGUGGUGAGAGAGAUC&AUUUUUUCUCACC-CUUC--UCAUUUU	0	0	NA	1	27.2658	0.999764	0	27.2658	yes
PC-3p-268483_20	TRINITY_DN116997_c5_g1	1712	1735	1726	-34.1	-22.3	0.653959	18.5	8-19,1728-1717	1-7,1735-1729[UP5];20-24,1716-1712[UP3]	.....((((((((((((.......&.......)))))))))))).....	AUAUCGGGAAGGGUGAGCCUAUAC&AUUUUUUCUCACCCUUCUCAUUUU	1	24.9165	1	2	54.5316	0.988178	24.9165	54.5316	yes
PC-3p-268483_20	TRINITY_DN117455_c5_g6	178	203	192	-34.1	-23.3	0.683284	11	1-6,203-198;8-19,194-183;21-24,181-178	7-7,197-195[AILt];20-20,182-182[SIL]	((((.((((((((((((...((((((&))))))--.)))))))))))).))))	AAGAAGAGGAGGGUGAGUAUGAAGGU&AUUUUU--UCUCACCCUUCUCAUUUU	1	24.9165	0.99993	0	0	NA	24.9165	0	yes
PC-3p-268483_20	TRINITY_DN118166_c1_g1	352	377	366	-34.1	-22.6	0.662757	13	1-6,377-372;7-10,369-366;13-22,363-354	x-x,371-370[BULt];11-12,365-364[SIL];23-24,353-352[UP3]	..((((((((((..((((..((((((&))))))--))))..))))))))))..	AUGAUGAGGAGGAGGAGAGUGAAAGU&AUUUUU--UCUCACCCUUCUCAUUUU	2	49.8331	0.999841	0	0	NA	49.8331	0	yes
PC-3p-268483_20	TRINITY_DN118252_c3_g2	8	33	24	-34.1	-22.3	0.653959	12.5	3-12,31-22;13-18,20-15;19-22,13-10	1-2,33-32[UP5];x-x,21-21[BULt];x-x,14-14[BULt];23-24,9-8[UP3]	..((((.((((((.((((((((((..&..))))))))))-))))))-))))..	UUAGUGAAGGGGGUGUGAGAGGAGGA&AUUUUUUCUCAC-CCUUCU-CAUUUU	0	0	NA	1	27.2658	1	0	27.2658	yes
PC-3p-268483_20	TRINITY_DN118456_c1_g1	599	622	613	-34.1	-22.9	0.671554	11.5	5-16,618-607;19-24,604-599	1-4,622-619[UP5];17-18,606-605[SIL]	((((((..((((((((((((....&....))))))))))))..))))))	AAAGUGUUGGGGGUGAGGAAUUGG&AUUUUUUCUCACCCUUCUCAUUUU	0	0	NA	3	81.7974	0.941487	0	81.7974	yes
PC-3p-268483_20	TRINITY_DN119294_c3_g2	403	426	417	-34.1	-22.2	0.651026	10	2-13,425-414;16-22,411-405	1-1,426-426[UP5];14-15,413-412[SIL];23-24,404-403[UP3]	..(((((((..((((((((((((.&.))))))))))))..)))))))..	UUGAUGAGGCAGGUGAGGAGGAGG&AUUUUUUCUCACCCUUCUCAUUUU	0	0	NA	1	27.2658	1	0	27.2658	yes
PC-3p-268483_20	TRINITY_DN119312_c1_g2	23	49	40	-34.1	-23.12	0.678006	15.5	3-10,47-40;13-24,34-23	1-2,49-48[UP5];11-12,39-35[AILt]	((((((((((((.....((((((((..&..))))))))---..))))))))))))	AGAAUGAGAAGGAGAAGGAGAAGGAGA&AUUUUUUCUC---ACCCUUCUCAUUUU	3	74.7496	0.996336	5	136.329	0.995704	74.7496	136.329	yes
PC-3p-268483_20	TRINITY_DN119328_c0_g1	383	406	397	-34.1	-22.5	0.659824	13.5	3-10,404-397;12-19,395-388	1-2,406-405[UP5];11-11,396-396[SIL];20-24,387-383[UP3]	.....((((((((.((((((((..&..)))))))).)))))))).....	AUUAAGAGGAGGGAGAGGGAGAUA&AUUUUUUCUCACCCUUCUCAUUUU	1	24.9165	1	0	0	NA	24.9165	0	yes
PC-3p-268483_20	TRINITY_DN119396_c0_g1	41	64	55	-34.1	-22.4	0.656891	8	2-12,63-53;15-24,50-41	1-1,64-64[UP5];13-14,52-51[SIL]	((((((((((..(((((((((((.&.)))))))))))..))))))))))	AAGAUGAGGAUAGUGAGGAGGAGG&AUUUUUUCUCACCCUUCUCAUUUU	0	0	NA	3	81.7974	0.99995	0	81.7974	yes
PC-3p-268483_20	TRINITY_DN119616_c3_g1	546	569	560	-34.1	-22.7	0.665689	11	2-9,568-561;11-19,559-551	1-1,569-569[UP5];10-10,560-560[SIL];20-24,550-546[UP3]	.....(((((((((.((((((((.&.)))))))).))))))))).....	AGUAAGAGAAGGGUCAGAAGAGGG&AUUUUUUCUCACCCUUCUCAUUUU	1	24.9165	1	0	0	NA	24.9165	0	yes
PC-3p-268483_20	TRINITY_DN120197_c0_g1	123	146	137	-34.1	-23	0.674487	18	8-20,139-127	1-7,146-140[UP5];21-24,126-123[UP3]	....(((((((((((((.......&.......)))))))))))))....	GUGUUGAGGGGGGUGAGUAAUAUU&AUUUUUUCUCACCCUUCUCAUUUU	1	24.9165	0.999993	0	0	NA	24.9165	0	yes
PC-3p-268483_20	TRINITY_DN120559_c0_g1	501	530	521	-34.1	-23.1	0.677419	17	1-11,530-520;12-12,518-518;13-24,512-501	x-x,519-519[BULt];x-x,517-513[BULt]	((((((((((((.....(.(((((((((((&)))))))))))-)-----))))))))))))	AGGAUGAGAAGGUUGACGUUGAGGAGGAGU&AUUUUUUCUCA-C-----CCUUCUCAUUUU	2	49.8331	0.88992	4	109.063	0.996471	49.8331	109.063	yes
PC-3p-268483_20	TRINITY_DN121007_c0_g1	366	389	380	-34.1	-22.9	0.671554	14.5	5-18,385-372	1-4,389-386[UP5];19-24,371-366[UP3]	......((((((((((((((....&....))))))))))))))......	AUAUUCGGAAGGGUGAGAAGUUGC&AUUUUUUCUCACCCUUCUCAUUUU	0	0	NA	1	27.2658	0.999985	0	27.2658	yes
PC-3p-268483_20	TRINITY_DN121026_c0_g1	51	75	66	-34.1	-23.1	0.677419	15	6-16,70-60;17-22,58-53	1-5,75-71[UP5];x-x,59-59[BULt];23-24,52-51[UP3]	..((((((.(((((((((((.....&.....)))))))))))-))))))..	GUGGUGGGUGAGGGUGAGGAUAUUG&AUUUUUUCUCACCCUU-CUCAUUUU	1	24.9165	0.999985	0	0	NA	24.9165	0	yes
PC-3p-268483_20	TRINITY_DN121213_c0_g3	345	372	363	-34.1	-26.1	0.765396	11	4-17,369-356;18-24,351-345	1-3,372-370[UP5];x-x,355-352[BULt]	(((((((....((((((((((((((...&...))))))))))))))----)))))))	AAGGUGAUUCUGAAGGGUGAGAGAACUG&AUUUUUUCUCACCCUUC----UCAUUUU	2	49.8331	0.287008	4	109.063	0.579251	49.8331	109.063	yes
PC-3p-268483_20	TRINITY_DN121394_c1_g3	143	178	169	-34.1	-22.5	0.659824	17.5	3-13,176-166;14-24,153-143	1-2,178-177[UP5];x-x,165-154[BULt]	(((((((((((............(((((((((((..&..)))))))))))------------)))))))))))	AAGAUGGGGAGAAGUGUGGUGAUGGUGAGAAGAAGA&AUUUUUUCUCACC------------CUUCUCAUUUU	20	498.331	0.968075	24	654.379	0.97651	498.331	654.379	yes
PC-3p-268483_20	TRINITY_DN121394_c1_g3	65	88	79	-34.1	-25.8	0.756598	8.5	2-18,87-71	1-1,88-88[UP5];19-24,70-65[UP3]	......(((((((((((((((((.&.)))))))))))))))))......	AGCACAAGGAGGGUGAGAAGAAAG&AUUUUUUCUCACCCUUCUCAUUUU	25	622.913	0.334675	52	1417.82	0.358392	622.913	1417.82	yes
PC-3p-268483_20	TRINITY_DN121702_c0_g6	203	232	223	-34.1	-24.8	0.727273	14	4-18,229-215;19-23,208-204	1-3,232-230[UP5];x-x,214-209[BULt];24-24,203-203[UP3]	.(((((......(((((((((((((((...&...)))))))))))))))------))))).	UGAAUGUACAAAGGAAGGGUGAGAAGAUUG&AUUUUUUCUCACCCUUCU------CAUUUU	2	49.8331	0.547015	0	0	NA	49.8331	0	yes
PC-3p-268483_20	TRINITY_DN121959_c1_g1	837	859	850	-34.1	-22.8	0.668622	13	3-15,857-845;17-19,844-842	1-2,859-858[UP5];16-16,x-x[BULq];20-24,841-837[UP3]	.....(((-(((((((((((((..&..))))))))))))).))).....	UUCAAGAG-AGGGUGGGGGAGAGA&AUUUUUUCUCACCCUUCUCAUUUU	5	124.583	0.999331	1	27.2658	0.999991	124.583	27.2658	yes
PC-3p-268483_20	TRINITY_DN122036_c3_g3	881	904	895	-34.1	-22.8	0.668622	18.5	8-19,897-886	1-7,904-898[UP5];20-24,885-881[UP3]	.....((((((((((((.......&.......)))))))))))).....	GUAUGGAGGAGGGUGAGUUCUCUG&AUUUUUUCUCACCCUUCUCAUUUU	1	24.9165	0.999999	0	0	NA	24.9165	0	yes
PC-3p-268483_20	TRINITY_DN122476_c2_g1	799	824	814	-34.1	-22.4	0.656891	11.5	1-5,824-820;6-17,818-807;18-19,805-804	x-x,819-819[BULt];x-x,806-806[BULt];20-24,803-799[UP3]	.....((.((((((((((((.(((((&)))))-))))))))))))-)).....	GGCCCGAUGAGGGGUGAGAAUGGGAU&AUUUU-UUCUCACCCUUC-UCAUUUU	0	0	NA	1	27.2658	1	0	27.2658	yes
PC-3p-268483_20	TRINITY_DN122535_c2_g2	509	536	523	-34.1	-23.6	0.692082	13	2-8,535-529;9-14,524-519;16-24,517-509	1-1,536-536[UP5];x-x,528-525[BULt];15-15,518-518[SIL]	(((((((((.((((((....(((((((.&.)))))))----)))))).)))))))))	GAGAUGAGACGGGUGGUGAUGAGAAAAG&AUUUUUUC----UCACCCUUCUCAUUUU	1	24.9165	0.999587	2	54.5316	0.82329	24.9165	54.5316	yes
PC-3p-268483_20	TRINITY_DN122865_c2_g2	748	771	762	-34.1	-23.4	0.686217	15	5-9,767-763;12-23,760-749	1-4,771-768[UP5];10-11,762-761[SIL];24-24,748-748[UP3]	.((((((((((((..(((((....&....)))))..)))))))))))).	UGGAUGAGAAGGGGAAGGAGCUUG&AUUUUUUCUCACCCUUCUCAUUUU	1	24.9165	0.999867	1	27.2658	0.99952	24.9165	27.2658	yes
PC-3p-268483_20	TRINITY_DN123014_c1_g2	1010	1034	1025	-34.1	-22.5	0.659824	13	2-10,1033-1025;13-24,1021-1010	1-1,1034-1034[UP5];11-12,1024-1022[AILt]	((((((((((((...(((((((((.&.)))))))))-..))))))))))))	GGGAUGAGGAGGAAGGAGGGGAGAG&AUUUUUUCUC-ACCCUUCUCAUUUU	0	0	NA	1	27.2658	0.999999	0	27.2658	yes
PC-3p-268483_20	TRINITY_DN123232_c3_g2	444	470	461	-34.1	-23.1	0.677419	15	4-10,467-461;11-20,457-448	1-3,470-468[UP5];x-x,460-458[BULt];21-24,447-444[UP3]	....((((((((((...(((((((...&...)))))))---))))))))))....	CUAUUGAGAAGGGUAUGGAGAAAACGG&AUUUUUUCUC---ACCCUUCUCAUUUU	0	0	NA	1	27.2658	0.999939	0	27.2658	yes
PC-3p-268483_20	TRINITY_DN124153_c3_g2	981	1004	995	-34.1	-22.3	0.653959	19	7-19,998-986	1-6,1004-999[UP5];20-24,985-981[UP3]	.....(((((((((((((......&......))))))))))))).....	UAUCAGGGAGGGGUGGGGCGGCGU&AUUUUUUCUCACCCUUCUCAUUUU	0	0	NA	2	54.5316	0.989397	0	54.5316	yes
PC-3p-268483_20	TRINITY_DN124208_c4_g1	575	598	589	-34.1	-22.4	0.656891	12.5	6-10,593-589;12-14,588-586;15-24,584-575	1-5,598-594[UP5];11-11,x-x[BULq];x-x,585-585[BULt]	((((((((((.(((-(((((.....&.....))))).)))-))))))))))	AAGAUGAGAAUGGG-GAGAAUUCUU&AUUUUUUCUCACCC-UUCUCAUUUU	0	0	NA	2	54.5316	0.981574	0	54.5316	yes
PC-3p-268483_20	TRINITY_DN124810_c4_g1	15	43	32	-34.1	-22.5	0.659824	13	1-6,43-38;7-15,35-27;16-22,23-17	x-x,37-36[BULt];x-x,26-24[BULt];23-24,16-15[UP3]	..(((((((...(((((((((..((((((&))))))--)))))))))---)))))))..	UUGGUGAGAAUGAGGGUGAGGGUAAGGAU&AUUUUU--UCUCACCCU---UCUCAUUUU	0	0	NA	1	27.2658	0.999999	0	27.2658	yes
PC-3p-268483_20	TRINITY_DN125051_c2_g3	1139	1162	1153	-34.1	-23.1	0.677419	14	6-15,1157-1148;17-21,1146-1142	1-5,1162-1158[UP5];16-16,1147-1147[SIL];22-24,1141-1139[UP3]	...(((((.((((((((((.....&.....)))))))))).)))))...	AACAUGAGCAGGGUGAGGAUGAUG&AUUUUUUCUCACCCUUCUCAUUUU	2	49.8331	0.897279	8	218.126	0.997044	49.8331	218.126	yes
PC-3p-268483_20	TRINITY_DN125051_c2_g3	626	649	640	-34.1	-22.9	0.671554	12.5	2-10,648-640;12-19,638-631	1-1,649-649[UP5];11-11,639-639[SIL];20-24,630-626[UP3]	.....((((((((.(((((((((.&.))))))))).)))))))).....	AUGACGAGGAGGGGGAGGGGGAAG&AUUUUUUCUCACCCUUCUCAUUUU	0	0	NA	1	27.2658	0.999987	0	27.2658	yes
PC-3p-268483_20	TRINITY_DN88650_c0_g1	1223	1246	1237	-34.1	-23.6	0.692082	10	1-11,1246-1236;13-20,1234-1227	12-12,1235-1235[SIL];21-24,1226-1223[UP3]	....((((((((.(((((((((((&))))))))))).))))))))....	ACACUGAGAAGGAUGGGAAGGGAU&AUUUUUUCUCACCCUUCUCAUUUU	0	0	NA	3	81.7974	0.984259	0	81.7974	yes
PC-3p-268483_20	TRINITY_DN89431_c0_g1	261	288	275	-34.1	-22.8	0.668622	17	4-8,285-281;9-20,276-265	1-3,288-286[UP5];x-x,280-277[BULt];21-24,264-261[UP3]	....((((((((((((....(((((...&...)))))----))))))))))))....	AGCUUGAGAAGGGUGAUAUUGAAAAUGU&AUUUUUUC----UCACCCUUCUCAUUUU	0	0	NA	1	27.2658	0.999994	0	27.2658	yes
PC-3p-268483_20	TRINITY_DN91248_c0_g1	494	519	510	-34.1	-23.9	0.70088	8.5	1-12,519-508;13-17,506-502;18-20,500-498	x-x,507-507[BULt];x-x,501-501[BULt];21-24,497-494[UP3]	....(((.(((((.((((((((((((&))))))))))))-)))))-)))....	AUGUUGAUGGAGGAGUGAGAAAGAAU&AUUUUUUCUCAC-CCUUC-UCAUUUU	1	24.9165	0.998139	0	0	NA	24.9165	0	yes
PC-3p-268483_20	TRINITY_DN91606_c0_g1	337	363	354	-34.1	-23	0.674487	15.5	7-18,357-346;19-24,342-337	1-6,363-358[UP5];x-x,345-343[BULt]	((((((...((((((((((((......&......))))))))))))---))))))	AGGAUGCGUAGGAGGGUGAGACGCCGU&AUUUUUUCUCACCCUUCU---CAUUUU	1	24.9165	0.999992	1	27.2658	0.999959	24.9165	27.2658	yes
PC-3p-268483_20	TRINITY_DN91669_c0_g1	747	770	761	-34.1	-24.3	0.71261	11	2-17,769-754	1-1,770-770[UP5];18-24,753-747[UP3]	.......((((((((((((((((.&.)))))))))))))))).......	UAAUCAUGAAGGGUGAGGGAAGAG&AUUUUUUCUCACCCUUCUCAUUUU	0	0	NA	2	54.5316	0.932493	0	54.5316	yes
PC-3p-268483_20	TRINITY_DN91960_c1_g3	174	196	187	-34.1	-23.5	0.68915	12	5-17,192-180;19-21,179-177	1-4,196-193[UP5];18-18,x-x[BULq];22-24,176-174[UP3]	...(((-(((((((((((((....&....))))))))))))).)))...	GACAUG-GAAGGGUGAGGAAUGUU&AUUUUUUCUCACCCUUCUCAUUUU	1	24.9165	0.999765	6	163.595	0.987323	24.9165	163.595	yes
PC-3p-268483_20	TRINITY_DN91963_c0_g1	250	275	264	-34.1	-25.8	0.756598	13	1-5,275-271;6-20,268-254	x-x,270-269[BULt];21-24,253-250[UP3]	....(((((((((((((((..(((((&)))))--)))))))))))))))....	ACUUUGAGAAGGGUGGGGACGGAGGU&AUUUU--UUCUCACCCUUCUCAUUUU	0	0	NA	2	54.5316	0.0301987	0	54.5316	yes
PC-3p-268483_20	TRINITY_DN95911_c1_g2	412	438	429	-34.1	-23.1	0.677419	11.5	1-13,438-426;14-19,422-417	x-x,425-423[BULt];20-24,416-412[UP3]	.....((((((...(((((((((((((&)))))))))))))---)))))).....	GGCAAGAGGAGCAUGGUGAGGAAAGGU&AUUUUUUCUCACC---CUUCUCAUUUU	0	0	NA	1	27.2658	0.999931	0	27.2658	yes
PC-3p-268483_20	TRINITY_DN95911_c1_g2	484	507	498	-34.1	-25	0.733138	8.5	1-10,507-498;12-19,496-489;21-24,487-484	11-11,497-497[SIL];20-20,488-488[SIL]	((((.((((((((.((((((((((&)))))))))).)))))))).))))	GAAGGGAGGAGGGGGAGGAGGAGU&AUUUUUUCUCACCCUUCUCAUUUU	1	24.9165	0.960737	0	0	NA	24.9165	0	yes
PC-3p-268483_20	TRINITY_DN96429_c3_g1	514	538	528	-34.1	-24	0.703812	10	2-8,537-531;9-10,529-528;12-22,526-516	1-1,538-538[UP5];x-x,530-530[BULt];11-11,527-527[SIL];23-24,515-514[UP3]	..(((((((((((.((.(((((((.&.)))))))-)).)))))))))))..	ACGAUGAGGAGGGCGGUGAAAAGAG&AUUUUUUC-UCACCCUUCUCAUUUU	0	0	NA	1	27.2658	0.99367	0	27.2658	yes
PC-3p-268483_20	TRINITY_DN98290_c0_g1	202	227	216	-34.1	-22.6	0.662757	13	1-6,227-222;7-10,219-216;13-22,213-204	x-x,221-220[BULt];11-12,215-214[SIL];23-24,203-202[UP3]	..((((((((((..((((..((((((&))))))--))))..))))))))))..	AUGAUGAGGAGGAGGAGAGUGAAAGU&AUUUUU--UCUCACCCUUCUCAUUUU	5	124.583	0.999824	2	54.5316	0.999775	124.583	54.5316	yes
PC-3p-268483_20	TRINITY_DN98582_c0_g1	97	121	112	-34.1	-22.5	0.659824	12.5	2-14,120-108;17-22,104-99	1-1,121-121[UP5];15-16,107-105[AILt];23-24,98-97[UP3]	..((((((...(((((((((((((.&.)))))))))))))-..))))))..	GUGAUGAGUGUGGGUGGGAGGGGGG&AUUUUUUCUCACCC-UUCUCAUUUU	2	49.8331	0.999906	0	0	NA	49.8331	0	yes
PC-3p-268483_20	TRINITY_DN99023_c1_g2	433	455	447	-34.1	-23.9	0.70088	6	1-9,455-447;11-17,446-440;19-24,438-433	10-10,x-x[BULq];18-18,439-439[SIL]	((((((.(((((((-(((((((((&))))))))).))))))).))))))	GAAAUGCGGAGGGU-AGAAAGAGU&AUUUUUUCUCACCCUUCUCAUUUU	2	49.8331	0.739578	0	0	NA	49.8331	0	yes
PC-3p-268483_20	TRINITY_DN99247_c3_g1	399	424	415	-34.1	-23.4	0.686217	13	4-12,421-413;13-17,411-407;18-24,405-399	1-3,424-422[UP5];x-x,412-412[BULt];x-x,406-406[BULt]	(((((((.(((((.(((((((((...&...)))))))))-)))))-)))))))	GAGAUGAUGAAGGAGUGGGAGGGUGA&AUUUUUUCUCAC-CCUUC-UCAUUUU	3	74.7496	0.991594	0	0	NA	74.7496	0	yes
PC-3p-29322_285	TRINITY_DN104696_c0_g1	1309	1332	1323	-35.2	-23.9	0.678977	9	2-19,1331-1314	1-1,1332-1332[UP5];20-24,1313-1309[UP3]	.....((((((((((((((((((.&.)))))))))))))))))).....	GGCCUGCCUAUUUAUAAUAGCUUG&AAGGCUGUUAUAGAUAGGUUUAUU	0	0	NA	1	27.2658	0.619914	0	27.2658	yes
PC-3p-29322_285	TRINITY_DN109416_c0_g2	65	90	81	-35.2	-23	0.653409	11.5	3-15,88-76;16-22,73-67	1-2,90-89[UP5];x-x,75-74[BULt];23-24,66-65[UP3]	..(((((((..(((((((((((((..&..)))))))))))))--)))))))..	GUUGAAUCUAAGUCUGUGACAGUCGC&AAGGCUGUUAUAGAU--AGGUUUAUU	1	24.9165	0.94279	1	27.2658	0.913762	24.9165	27.2658	yes
PC-3p-29322_285	TRINITY_DN112976_c2_g1	431	455	445	-35.2	-25.3	0.71875	9.5	4-6,452-450;7-24,448-431	1-3,455-453[UP5];x-x,449-449[BULt]	((((((((((((((((((.(((...&...)))-))))))))))))))))))	GAUAAACUUGUCUAUGACGAGCAAA&AAGGCU-GUUAUAGAUAGGUUUAUU	0	0	NA	1	27.2658	0.32087	0	27.2658	yes
PC-3p-29322_285	TRINITY_DN113975_c0_g5	1544	1567	1558	-35.2	-23.5	0.667614	8.5	1-9,1567-1559;12-17,1556-1551;19-22,1549-1546	10-11,1558-1557[SIL];18-18,1550-1550[SIL];23-24,1545-1544[UP3]	..((((.((((((..(((((((((&)))))))))..)))))).))))..	GUUGAAGCUGUUUUGAACAGCCUU&AAGGCUGUUAUAGAUAGGUUUAUU	1	24.9165	0.847753	0	0	NA	24.9165	0	yes
PC-3p-29322_285	TRINITY_DN117481_c1_g1	802	825	816	-35.2	-25.5	0.724432	7.5	1-18,825-808;20-22,806-804	19-19,807-807[SIL];23-24,803-802[UP3]	..(((.((((((((((((((((((&)))))))))))))))))).)))..	UUUGAUUCUGUCUAUGACGGUCUU&AAGGCUGUUAUAGAUAGGUUUAUU	1	24.9165	0.313707	1	27.2658	0.27563	24.9165	27.2658	yes
PC-3p-29322_285	TRINITY_DN117688_c0_g2	373	396	387	-35.2	-23.1	0.65625	11.5	2-9,395-388;12-18,385-379	1-1,396-396[UP5];10-11,387-386[SIL];19-24,378-373[UP3]	......(((((((..((((((((.&.))))))))..)))))))......	UUCCUUCCUGUCUUAAACAGCCUG&AAGGCUGUUAUAGAUAGGUUUAUU	1	24.9165	0.925541	0	0	NA	24.9165	0	yes
PC-3p-29322_285	TRINITY_DN119613_c3_g1	121	145	136	-35.2	-23	0.653409	12.5	5-17,141-129;18-23,127-122	1-4,145-142[UP5];x-x,128-128[BULt];24-24,121-121[UP3]	.((((((.(((((((((((((....&....)))))))))))))-)))))).	CGUAAGCACUGUCUAUGACGGGAAA&AAGGCUGUUAUAGAUAG-GUUUAUU	1	24.9165	0.933493	0	0	NA	24.9165	0	yes
PC-3p-29322_285	TRINITY_DN119893_c2_g1	666	689	680	-35.2	-25.3	0.71875	11	4-12,686-678;14-21,676-669	1-3,689-687[UP5];13-13,677-677[SIL];22-24,668-666[UP3]	...((((((((.(((((((((...&...))))))))).))))))))...	GAAGAACCUGUGUGUAACAGCGGC&AAGGCUGUUAUAGAUAGGUUUAUU	6	149.499	0.199679	10	272.658	0.194611	149.499	272.658	yes
PC-3p-29322_285	TRINITY_DN120125_c0_g1	1573	1596	1587	-35.2	-23.6	0.670455	12	3-6,1594-1591;8-11,1589-1586;13-24,1584-1573	1-2,1596-1595[UP5];7-7,1590-1590[SIL];12-12,1585-1585[SIL]	((((((((((((.((((.((((..&..)))).)))).))))))))))))	GGUGAACUUAUCGGUGGGAGCCAA&AAGGCUGUUAUAGAUAGGUUUAUU	3	74.7496	0.606026	3	81.7974	0.595486	74.7496	81.7974	yes
PC-3p-29322_285	TRINITY_DN122036_c3_g3	532	557	548	-35.2	-23	0.653409	12.5	3-15,555-543;17-22,539-534	1-2,557-556[UP5];16-16,542-540[AILt];23-24,533-532[UP3]	..((((((...(((((((((((((..&..)))))))))))))--.))))))..	UUUGAGCCCUCGUCUAUGAUGGCCAA&AAGGCUGUUAUAGAU--AGGUUUAUU	8	199.332	0.771953	1	27.2658	0.905002	199.332	27.2658	yes
PC-3p-29322_285	TRINITY_DN92976_c6_g2	305	328	319	-35.2	-29.6	0.840909	3.5	2-4,327-325;6-24,323-305	1-1,328-328[UP5];5-5,324-324[SIL]	(((((((((((((((((((.(((.&.))).)))))))))))))))))))	GAUAAACCUAUCUAUAACAACCUG&AAGGCUGUUAUAGAUAGGUUUAUU	0	0	NA	1	27.2658	0.0922041	0	27.2658	yes
PC-3p-29322_285	TRINITY_DN97755_c0_g1	1295	1318	1309	-35.2	-23.2	0.659091	10	3-7,1316-1312;9-17,1310-1302;19-21,1300-1298	1-2,1318-1317[UP5];8-8,1311-1311[SIL];18-18,1301-1301[SIL];22-24,1297-1295[UP3]	...(((.(((((((((.(((((..&..))))).))))))))).)))...	UCAAGGGCUAUCUAUAUCAGCCAU&AAGGCUGUUAUAGAUAGGUUUAUU	3	74.7496	0.720767	2	54.5316	0.710486	74.7496	54.5316	yes
PC-3p-32918_256	TRINITY_DN101689_c0_g1	173	193	184	-33.7	-23.1	0.68546	12	5-18,189-176	1-4,193-190[UP5];19-21,175-173[UP3]	...((((((((((((((....&....))))))))))))))...	UGAAGGUGGUUUUGGAAAGGU&AUAAUUCCGAGACCACCUAUU	2	49.8331	0.896474	0	0	NA	49.8331	0	yes
PC-3p-32918_256	TRINITY_DN104509_c4_g1	264	284	275	-33.7	-22.4	0.664688	9	2-8,283-277;10-17,275-268	1-1,284-284[UP5];9-9,276-276[SIL];18-21,267-264[UP3]	....((((((((.(((((((.&.))))))).))))))))....	GGCUGGUGGUCUAGGGAUUGA&AUAAUUCCGAGACCACCUAUU	0	0	NA	1	27.2658	0.998778	0	27.2658	yes
PC-3p-32918_256	TRINITY_DN105237_c0_g1	1047	1067	1058	-33.7	-25.8	0.765579	7.5	1-10,1067-1058;12-18,1056-1050	11-11,1057-1057[SIL];19-21,1049-1047[UP3]	...(((((((.((((((((((&)))))))))).)))))))...	AUCGGGUGGUGUUGGAGUUAU&AUAAUUCCGAGACCACCUAUU	0	0	NA	1	27.2658	0.421993	0	27.2658	yes
PC-3p-32918_256	TRINITY_DN110219_c1_g5	15	36	27	-33.7	-22.5	0.667656	10.5	4-9,33-28;11-13,26-24;14-21,22-15	1-3,36-34[UP5];10-10,27-27[SIL];x-x,23-23[BULt]	((((((((.(((.((((((...&...)))))).)))-))))))))	AAUGGGUGAGUCGUGGAGUAGG&AUAAUUCCGAGAC-CACCUAUU	1	24.9165	0.999217	2	54.5316	0.796258	24.9165	54.5316	yes
PC-3p-32918_256	TRINITY_DN110653_c0_g1	248	268	259	-33.7	-23.3	0.691395	14	6-10,263-259;12-18,257-251	1-5,268-264[UP5];11-11,258-258[SIL];19-21,250-248[UP3]	...(((((((.(((((.....&.....))))).)))))))...	AUAAGGUGGUGUCGGAGAAGG&AUAAUUCCGAGACCACCUAUU	4	99.6661	0.850945	0	0	NA	99.6661	0	yes
PC-3p-32918_256	TRINITY_DN111420_c0_g1	27	47	38	-33.7	-24	0.712166	12	5-10,43-38;12-21,36-27	1-4,47-44[UP5];11-11,37-37[SIL]	((((((((((.((((((....&....)))))).))))))))))	AGUGGGUGGUGUUGGGAGUAA&AUAAUUCCGAGACCACCUAUU	0	0	NA	1	27.2658	0.845911	0	27.2658	yes
PC-3p-32918_256	TRINITY_DN111421_c1_g1	1496	1522	1507	-33.7	-22.3	0.661721	18	3-9,1520-1514;10-21,1507-1496	1-2,1522-1521[UP5];x-x,1513-1508[BULt]	((((((((((((......(((((((..&..)))))))------))))))))))))	AGUGGGUGGUUUUAGGGACGGAGUUUA&AUAAUUCCG------AGACCACCUAUU	1	24.9165	0.999717	0	0	NA	24.9165	0	yes
PC-3p-32918_256	TRINITY_DN115893_c2_g1	327	347	338	-33.7	-22.2	0.658754	12.5	5-10,343-338;13-20,335-328	1-4,347-344[UP5];11-12,337-336[SIL];21-21,327-327[UP3]	.((((((((..((((((....&....))))))..)))))))).	CAUGGGUGGCAUCGGAAAAAC&AUAAUUCCGAGACCACCUAUU	0	0	NA	2	54.5316	0.85546	0	54.5316	yes
PC-3p-32918_256	TRINITY_DN119284_c0_g1	2878	2898	2889	-33.7	-23.9	0.709199	8.5	1-11,2898-2888;13-18,2886-2881	12-12,2887-2887[SIL];19-21,2880-2878[UP3]	...((((((.(((((((((((&))))))))))).))))))...	UGAGGGUGGACUUGGGAUUGU&AUAAUUCCGAGACCACCUAUU	3	74.7496	0.715055	2	54.5316	0.704733	74.7496	54.5316	yes
PC-3p-32918_256	TRINITY_DN120536_c2_g1	1314	1334	1325	-33.7	-23.7	0.703264	9	1-9,1334-1326;11-18,1324-1317	10-10,1325-1325[SIL];19-21,1316-1314[UP3]	...((((((((.(((((((((&))))))))).))))))))...	UCAAGGUGGUUACGGGGUUGU&AUAAUUCCGAGACCACCUAUU	0	0	NA	2	54.5316	0.766828	0	54.5316	yes
PC-3p-32918_256	TRINITY_DN122108_c0_g4	827	847	838	-33.7	-23.5	0.697329	15	7-17,841-831	1-6,847-842[UP5];18-21,830-827[UP3]	....(((((((((((......&......)))))))))))....	CUUUGGUGGUCUCGGUAACAC&AUAAUUCCGAGACCACCUAUU	0	0	NA	3	81.7974	0.815865	0	81.7974	yes
PC-3p-32918_256	TRINITY_DN122591_c1_g1	686	707	697	-33.7	-23.2	0.688427	12	4-7,704-701;8-18,699-689	1-3,707-705[UP5];x-x,700-700[BULt];19-21,688-686[UP3]	...(((((((((((.((((...&...))))-)))))))))))...	AAAAGGUGGUCUUGAGAGUAGG&AUAAUUC-CGAGACCACCUAUU	2	49.8331	0.887739	0	0	NA	49.8331	0	yes
PC-3p-32918_256	TRINITY_DN122919_c0_g4	1596	1616	1607	-33.7	-23.2	0.688427	10	2-5,1615-1612;7-10,1610-1607;12-18,1605-1599	1-1,1616-1616[UP5];6-6,1611-1611[SIL];11-11,1606-1606[SIL];19-21,1598-1596[UP3]	...(((((((.((((.((((.&.)))).)))).)))))))...	GAGAGGUGGUGUCGGUGUUGG&AUAAUUCCGAGACCACCUAUU	0	0	NA	1	27.2658	0.958922	0	27.2658	yes
PC-3p-32918_256	TRINITY_DN124115_c3_g1	664	684	675	-33.7	-22.1	0.655786	15	7-18,678-667	1-6,684-679[UP5];19-21,666-664[UP3]	...((((((((((((......&......))))))))))))...	AGAAGGUGGUUUCGGCUCUGU&AUAAUUCCGAGACCACCUAUU	1	24.9165	0.999897	0	0	NA	24.9165	0	yes
PC-3p-32918_256	TRINITY_DN125121_c0_g1	516	536	527	-33.7	-22.9	0.679525	12	4-10,533-527;12-18,525-519	1-3,536-534[UP5];11-11,526-526[SIL];19-21,518-516[UP3]	...(((((((.(((((((...&...))))))).)))))))...	AGGAGGUGGUGUUGGGAUGAU&AUAAUUCCGAGACCACCUAUU	0	0	NA	1	27.2658	0.990059	0	27.2658	yes
PC-3p-32918_256	TRINITY_DN88092_c0_g1	755	775	766	-33.7	-22.2	0.658754	13	5-16,771-760	1-4,775-772[UP5];17-21,759-755[UP3]	.....((((((((((((....&....)))))))))))).....	AUUUUGUGGUCUCGGGAAAUU&AUAAUUCCGAGACCACCUAUU	0	0	NA	2	54.5316	0.990375	0	54.5316	yes
PC-3p-32918_256	TRINITY_DN90948_c3_g2	529	548	539	-33.7	-22.6	0.670623	8	3-14,546-535;16-18,534-532	1-2,548-547[UP5];15-15,x-x[BULq];19-21,531-529[UP3]	...(((-((((((((((((..&..)))))))))))).)))...	CAAAGG-GGUCUUGGAAUUCC&AUAAUUCCGAGACCACCUAUU	0	0	NA	1	27.2658	0.995838	0	27.2658	yes
PC-3p-32918_256	TRINITY_DN92863_c2_g1	234	254	245	-33.7	-22.9	0.679525	15.5	7-18,248-237	1-6,254-249[UP5];19-21,236-234[UP3]	...((((((((((((......&......))))))))))))...	UCGGGGUGGUCUUGGUAGCGU&AUAAUUCCGAGACCACCUAUU	0	0	NA	2	54.5316	0.936363	0	54.5316	yes
PC-3p-32918_256	TRINITY_DN93472_c7_g3	402	423	413	-33.7	-22.4	0.664688	14	5-8,419-416;9-20,414-403	1-4,423-420[UP5];x-x,415-415[BULt];21-21,402-402[UP3]	.((((((((((((.((((....&....))))-)))))))))))).	CGUGGGUGGUCUUAGGGGCACG&AUAAUUCC-GAGACCACCUAUU	1	24.9165	0.999587	0	0	NA	24.9165	0	yes
PC-3p-32918_256	TRINITY_DN95948_c2_g2	509	528	520	-33.7	-24.9	0.738872	8.5	1-5,528-524;7-18,523-512	6-6,x-x[BULq];19-21,511-509[UP3]	...((((((((((((-(((((&))))).))))))))))))...	CCGGGGUGGUCUUGG-GUUGU&AUAAUUCCGAGACCACCUAUU	1	24.9165	0.609812	0	0	NA	24.9165	0	yes
PC-3p-32918_256	TRINITY_DN96756_c5_g2	406	426	417	-33.7	-22.1	0.655786	11.5	1-2,426-425;5-10,422-417;12-18,415-409	3-4,424-423[SIL];11-11,416-416[SIL];19-21,408-406[UP3]	...(((((((.((((((..((&))..)))))).)))))))...	GAAGGGUGGUGUUGGAAGAGU&AUAAUUCCGAGACCACCUAUU	0	0	NA	2	54.5316	0.991613	0	54.5316	yes
PC-3p-32918_256	TRINITY_DN97133_c0_g1	486	505	496	-33.7	-23.7	0.703264	6.5	1-4,505-502;6-14,500-492;16-21,491-486	5-5,501-501[SIL];15-15,x-x[BULq]	((((((-(((((((((.((((&)))).))))))))).))))))	AGUAGG-GGUUUCGGGUUUGU&AUAAUUCCGAGACCACCUAUU	1	24.9165	0.946939	2	54.5316	0.479573	24.9165	54.5316	yes
PC-3p-34005_248	TRINITY_DN103635_c1_g5	254	278	269	-39.9	-27.5	0.689223	11	4-16,275-263;19-19,259-259;22-24,256-254	1-3,278-276[UP5];17-18,262-260[AILt];20-21,258-257[SIL]	(((..(...(((((((((((((...&...)))))))))))))-..)..)))	GAGUUAGACACCACAGCCGCACCAC&AAUGUGCGGUUGUGGU-UAUUUCUC	2	49.8331	0.0193966	0	0	NA	49.8331	0	yes
PC-3p-34005_248	TRINITY_DN115787_c1_g1	672	695	686	-39.9	-28.7	0.719298	7	2-5,694-691;7-23,689-673	1-1,695-695[UP5];6-6,690-690[SIL];24-24,672-672[UP3]	.(((((((((((((((((.((((.&.)))).))))))))))))))))).	CGGAAGUAACCAUAACCGAACGUA&AAUGUGCGGUUGUGGUUAUUUCUC	3	74.7496	0.291241	0	0	NA	74.7496	0	yes
PC-3p-34005_248	TRINITY_DN116727_c3_g4	126	149	140	-39.9	-26.5	0.66416	8	3-6,147-144;8-17,142-133;19-24,131-126	1-2,149-148[UP5];7-7,143-143[SIL];18-18,132-132[SIL]	((((((.((((((((((.((((..&..)))).)))))))))).))))))	GAGAAGAAGCCACAACUACACACA&AAUGUGCGGUUGUGGUUAUUUCUC	4	99.6661	0.762528	0	0	NA	99.6661	0	yes
PC-3p-34005_248	TRINITY_DN117061_c5_g2	219	242	233	-39.9	-28.2	0.706767	9	1-17,242-226	18-24,225-219[UP3]	.......(((((((((((((((((&))))))))))))))))).......	AACCACAAACCACAGCCGCAUAUU&AAUGUGCGGUUGUGGUUAUUUCUC	0	0	NA	1	27.2658	0.523668	0	27.2658	yes
PC-3p-34005_248	TRINITY_DN117565_c0_g4	110	133	124	-39.9	-28.7	0.719298	7	2-5,132-129;7-23,127-111	1-1,133-133[UP5];6-6,128-128[SIL];24-24,110-110[UP3]	.(((((((((((((((((.((((.&.)))).))))))))))))))))).	CGGAAGUAACCAUAACCGAACGUA&AAUGUGCGGUUGUGGUUAUUUCUC	3	74.7496	0.276742	0	0	NA	74.7496	0	yes
PC-3p-34005_248	TRINITY_DN118836_c5_g2	179	202	193	-39.9	-27.8	0.696742	9.5	2-4,201-199;6-18,197-185;21-23,182-180	1-1,202-202[UP5];5-5,198-198[SIL];19-20,184-183[SIL];24-24,179-179[UP3]	.(((..(((((((((((((.(((.&.))).)))))))))))))..))).	AAGAUCUGACCACGGCCGCUCGUC&AAUGUGCGGUUGUGGUUAUUUCUC	1	24.9165	0.63811	0	0	NA	24.9165	0	yes
PC-3p-34005_248	TRINITY_DN120506_c0_g1	1120	1144	1135	-39.9	-27.4	0.686717	8	2-7,1143-1138;9-14,1136-1131;15-17,1129-1127;19-24,1125-1120	1-1,1144-1144[UP5];8-8,1137-1137[SIL];x-x,1130-1130[BULt];18-18,1126-1126[SIL]	((((((.(((.((((((.((((((.&.)))))).))))))-))).))))))	GAGAAGCGACACACAAUGGCGCAUG&AAUGUGCGGUUGUG-GUUAUUUCUC	0	0	NA	1	27.2658	0.706336	0	27.2658	yes
PC-3p-34005_248	TRINITY_DN120688_c0_g1	781	805	795	-39.9	-30.2	0.756892	10.5	3-8,803-798;11-24,794-781	1-2,805-804[UP5];9-10,797-795[AILt]	((((((((((((((...((((((..&..))))))-..))))))))))))))	GGGAAAUGGCCACAUUACGCACAAU&AAUGUGCG-GUUGUGGUUAUUUCUC	0	0	NA	3	81.7974	0.111351	0	81.7974	yes
PC-3p-34005_248	TRINITY_DN93621_c2_g1	72	94	85	-39.9	-27.2	0.681704	7.5	3-16,92-79;18-21,78-75	1-2,94-93[UP5];17-17,x-x[BULq];22-24,74-72[UP3]	...((((-((((((((((((((..&..)))))))))))))).))))...	CACAAAU-GCCACAACCGCACAAC&AAUGUGCGGUUGUGGUUAUUUCUC	1	24.9165	0.809172	0	0	NA	24.9165	0	yes
PC-3p-34005_248	TRINITY_DN98761_c3_g4	5	28	19	-39.9	-26.3	0.659148	5.5	1-6,28-23;8-17,21-12;19-23,10-6	7-7,22-22[SIL];18-18,11-11[SIL];24-24,5-5[UP3]	.(((((.((((((((((.((((((&)))))).)))))))))).))))).	AAGAAGAAACCACAACCACAUAUU&AAUGUGCGGUUGUGGUUAUUUCUC	0	0	NA	1	27.2658	0.919148	0	27.2658	yes
PC-3p-369008_12	TRINITY_DN104526_c0_g1	187	206	198	-30.2	-20.5	0.678808	10	5-8,202-199;10-21,198-187	1-4,206-203[UP5];9-9,x-x[BULq]	((((((((((((-((((....&....)))).))))))))))))	UUGUUCUGGAAC-CGUUAAGU&AUUAAACGUGUUCUAGAACGA	0	0	NA	4	109.063	0.467202	0	109.063	yes
PC-3p-369008_12	TRINITY_DN121593_c0_g3	891	911	902	-30.2	-19.7	0.652318	10.5	5-19,907-893	1-4,911-908[UP5];20-21,892-891[UP3]	..(((((((((((((((....&....)))))))))))))))..	UAGUUUUAGAACAUGUUAAUA&AUUAAACGUGUUCUAGAACGA	0	0	NA	4	109.063	0.762195	0	109.063	yes
PC-3p-369008_12	TRINITY_DN124348_c2_g1	100	128	119	-30.2	-19.9	0.65894	19.5	1-10,128-119;11-19,110-102	x-x,118-111[BULt];20-21,101-100[UP3]	..(((((((((........((((((((((&))))))))))--------)))))))))..	UGGUUCUGGAAAGCAUCUUCACGUUUGAU&AUUAAACGUG--------UUCUAGAACGA	0	0	NA	1	27.2658	0.873016	0	27.2658	yes
PC-3p-369008_12	TRINITY_DN124651_c1_g2	2995	3016	3006	-30.2	-21.6	0.715232	6	1-7,3016-3010;9-19,3007-2997;21-21,2995-2995	8-8,3009-3008[AILt];20-20,2996-2996[SIL]	(.(((((((((((..(((((((&)))))))-.))))))))))).)	UGGUUCUAGAACAAGGUUUGAU&AUUAAAC-GUGUUCUAGAACGA	2	49.8331	0.0810939	1	27.2658	0.298615	49.8331	27.2658	yes
PC-3p-369008_12	TRINITY_DN125195_c5_g2	43	66	57	-30.2	-20	0.662252	10	2-7,65-60;9-15,58-52;16-21,48-43	1-1,66-66[UP5];8-8,59-59[SIL];x-x,51-49[BULt]	((((((...(((((((.((((((.&.)))))).)))))))---))))))	UCGUUCGAUUAGGGCGGGUUUGAG&AUUAAACGUGUUCUA---GAACGA	1	24.9165	0.878534	0	0	NA	24.9165	0	yes
PC-3p-369008_12	TRINITY_DN97985_c0_g1	1086	1106	1097	-30.2	-20.3	0.672185	14.5	7-9,1100-1098;11-20,1096-1087	1-6,1106-1101[UP5];10-10,1097-1097[SIL];21-21,1086-1086[UP3]	.((((((((((.(((......&......))).)))))))))).	ACGUUCUGGAAGACGGAAGAU&AUUAAACGUGUUCUAGAACGA	3	74.7496	0.527268	0	0	NA	74.7496	0	yes
PC-3p-37407_227	TRINITY_DN100271_c0_g3	734	754	745	-34.9	-25.4	0.727794	5	2-12,753-743;14-17,741-738;19-21,736-734	1-1,754-754[UP5];13-13,742-742[SIL];18-18,737-737[SIL]	(((.((((.(((((((((((.&.))))))))))).)))).)))	CAUGGGACGACAAUGUUGCUC&UGGCAACAUUGUGGUUUGAUG	1	24.9165	0.651481	0	0	NA	24.9165	0	yes
PC-3p-37407_227	TRINITY_DN102013_c0_g2	260	280	271	-34.9	-23.7	0.679083	12	7-21,274-260	1-6,280-275[UP5]	(((((((((((((((......&......)))))))))))))))	CAUCAGGCCACAAUGGGAGAG&UGGCAACAUUGUGGUUUGAUG	1	24.9165	0.954356	0	0	NA	24.9165	0	yes
PC-3p-37407_227	TRINITY_DN104471_c0_g1	781	800	792	-34.9	-23.1	0.661891	8.5	2-9,799-792;11-18,791-784	1-1,800-800[UP5];10-10,x-x[BULq];19-21,783-781[UP3]	...((((((((-((((((((.&.)))))))).))))))))...	AGGCAGACCAC-GUGUUGCUG&UGGCAACAUUGUGGUUUGAUG	0	0	NA	1	27.2658	0.986276	0	27.2658	yes
PC-3p-37407_227	TRINITY_DN106910_c1_g1	410	437	427	-34.9	-23	0.659026	17	2-6,436-432;7-10,430-427;11-21,420-410	1-1,437-437[UP5];x-x,431-431[BULt];x-x,426-421[BULt]	(((((((((((......((((.(((((.&.)))))-))))------)))))))))))	CAUCAGACUACUUGAAAGAUGAUUGCCU&UGGCAA-CAUU------GUGGUUUGAUG	0	0	NA	1	27.2658	0.986712	0	27.2658	yes
PC-3p-37407_227	TRINITY_DN110450_c0_g1	401	420	412	-34.9	-25.4	0.727794	4	1-5,420-416;7-15,415-407;17-21,405-401	6-6,x-x[BULq];16-16,406-406[SIL]	(((((.(((((((((-(((((&))))).))))))))).)))))	CAUCGUAUCACAAUG-UGCCA&UGGCAACAUUGUGGUUUGAUG	0	0	NA	1	27.2658	0.567588	0	27.2658	yes
PC-3p-37407_227	TRINITY_DN110768_c0_g3	886	906	897	-34.9	-22.8	0.653295	9	3-10,904-897;13-21,894-886	1-2,906-905[UP5];11-12,896-895[SIL]	(((((((((..((((((((..&..))))))))..)))))))))	CAUCAGAUCUUGAUGUUGCAU&UGGCAACAUUGUGGUUUGAUG	0	0	NA	2	54.5316	0.763115	0	54.5316	yes
PC-3p-37407_227	TRINITY_DN111518_c1_g3	738	757	749	-34.9	-23.9	0.684814	8.5	1-7,757-751;11-20,748-739	8-10,750-749[AILq];21-21,738-738[UP3]	.((((((((((..-(((((((&)))))))...)))))))))).	GGUCAAACCAUCA-GUUGCCA&UGGCAACAUUGUGGUUUGAUG	0	0	NA	1	27.2658	0.898674	0	27.2658	yes
PC-3p-37407_227	TRINITY_DN112786_c0_g1	11	31	22	-34.9	-23.3	0.667622	5.5	1-12,31-20;15-19,17-13;21-21,11-11	13-14,19-18[SIL];20-20,12-12[SIL]	(.(((((..((((((((((((&))))))))))))..))))).)	CUUCAAGGAGCAGUGUUGCCA&UGGCAACAUUGUGGUUUGAUG	9	224.249	0.580536	3	81.7974	0.611774	224.249	81.7974	yes
PC-3p-37407_227	TRINITY_DN112828_c1_g1	696	715	707	-34.9	-22.9	0.65616	5	1-7,715-709;9-13,708-704;16-20,701-697	8-8,x-x[BULq];14-15,703-702[SIL];21-21,696-696[UP3]	.(((((..(((((-(((((((&))))))).)))))..))))).	AAUCAAAACACAA-GUUGCCA&UGGCAACAUUGUGGUUUGAUG	1	24.9165	0.996848	1	27.2658	0.992799	24.9165	27.2658	yes
PC-3p-37407_227	TRINITY_DN114261_c2_g4	626	646	637	-34.9	-24.4	0.69914	6.5	1-17,646-630;19-19,628-628	18-18,629-629[SIL];20-21,627-626[UP3]	..(.(((((((((((((((((&))))))))))))))))).)..	GUUGAGGCUAUAGUGUUGCCA&UGGCAACAUUGUGGUUUGAUG	5	124.583	0.636679	0	0	NA	124.583	0	yes
PC-3p-37407_227	TRINITY_DN115831_c0_g2	139	164	155	-34.9	-23.9	0.684814	15.5	3-11,162-154;12-21,148-139	1-2,164-163[UP5];x-x,153-149[BULt]	((((((((((.....(((((((((..&..)))))))))-----))))))))))	CAUCGAACCAACAAAUAGUGUUGCAC&UGGCAACAUUG-----UGGUUUGAUG	0	0	NA	2	54.5316	0.716126	0	54.5316	yes
PC-3p-37407_227	TRINITY_DN119855_c0_g1	733	758	749	-34.9	-25	0.716332	15	1-10,758-749;11-19,743-735	x-x,748-744[BULt];20-21,734-733[UP3]	..(((((((((.....((((((((((&))))))))))-----)))))))))..	ACUCGAGCCAUUUCAAGAUGUUGCCA&UGGCAACAUU-----GUGGUUUGAUG	0	0	NA	1	27.2658	0.643652	0	27.2658	yes
PC-3p-37407_227	TRINITY_DN120610_c1_g2	539	560	550	-34.9	-23.7	0.679083	7.5	2-9,559-552;11-21,549-539	1-1,560-560[UP5];10-10,551-550[AILt]	(((((((((((..((((((((.&.))))))))-.)))))))))))	UAUCAGACUACUCAUGUUGCUG&UGGCAACAU-UGUGGUUUGAUG	0	0	NA	1	27.2658	0.926602	0	27.2658	yes
PC-3p-37407_227	TRINITY_DN122439_c0_g2	362	387	378	-34.9	-24.5	0.702006	8	1-13,387-375;14-20,369-363	x-x,374-370[BULt];21-21,362-362[UP3]	.(((((((.....(((((((((((((&)))))))))))))-----))))))).	GAUCAGACAACAAUGCAAUGUUGCCA&UGGCAACAUUGUG-----GUUUGAUG	33	822.245	0.589743	22	599.847	0.308173	822.245	599.847	yes
PC-3p-37407_227	TRINITY_DN125162_c2_g1	303	322	313	-34.9	-24.5	0.702006	7	2-13,321-310;17-21,307-303	1-1,322-322[UP5];14-16,309-308[AILq]	(((((..-((((((((((((.&.))))))))))))...)))))	CGUCGUA-CACGGUGUUGCCG&UGGCAACAUUGUGGUUUGAUG	1	24.9165	0.786357	0	0	NA	24.9165	0	yes
PC-3p-384229_11	TRINITY_DN101572_c1_g1	531	553	545	-37	-24.9	0.672973	7.5	1-6,553-548;8-22,547-533	7-7,x-x[BULq];23-24,532-531[UP3]	..(((((((((((((((-((((((&)))))).)))))))))))))))..	GUUUGUAUGUGUAUCUC-CUAAAG&CUUUGGAGGGAUAUAUAUGCAAUU	2	49.8331	0.397239	1	27.2658	0.553418	49.8331	27.2658	yes
PC-3p-384229_11	TRINITY_DN109747_c2_g3	361	389	380	-37	-24.82	0.670811	15	1-12,389-378;14-16,371-369;18-23,367-362	13-13,377-372[AILt];17-17,368-368[SIL];24-24,361-361[UP3]	.((((((.(((......((((((((((((&))))))))))))-----.))).)))))).	UGUUGCAAGUAGAGAUCAUCCCUCCAGAG&CUUUGGAGGGAU-----AUAUAUGCAAUU	0	0	NA	1	27.2658	0.567588	0	27.2658	yes
PC-3p-384229_11	TRINITY_DN114179_c1_g1	499	523	513	-37	-24.4	0.659459	8.5	1-2,523-522;4-8,520-516;9-12,514-511;14-21,509-502	3-3,521-521[SIL];x-x,515-515[BULt];13-13,510-510[SIL];22-24,501-499[UP3]	...((((((((.((((.(((((.((&)).)))))-)))).))))))))...	UACUGCAUGUACAUCCACUCCACAG&CUUUGGAG-GGAUAUAUAUGCAAUU	1	24.9165	0.847753	0	0	NA	24.9165	0	yes
PC-3p-384229_11	TRINITY_DN117976_c0_g5	69	91	82	-37	-24.7	0.667568	7.5	4-18,88-74;20-24,73-69	1-3,91-89[UP5];19-19,x-x[BULq]	(((((-(((((((((((((((...&...))))))))))))))).)))))	AGUUG-AUAUAUAUCCCUCUACCU&CUUUGGAGGGAUAUAUAUGCAAUU	2	49.8331	0.224086	0	0	NA	49.8331	0	yes
PC-3p-384229_11	TRINITY_DN119959_c1_g1	632	656	647	-37	-24.7	0.667568	7.5	1-13,656-644;15-23,641-633	14-14,643-642[AILt];24-24,632-632[UP3]	.(((((((((..(((((((((((((&)))))))))))))-.))))))))).	UGUUGCAUAUUUUGUUUUUCCAAAG&CUUUGGAGGGAUA-UAUAUGCAAUU	2	49.8331	0.476898	2	54.5316	0.467202	49.8331	54.5316	yes
PC-3p-384229_11	TRINITY_DN124672_c3_g1	677	700	691	-37	-24.3	0.656757	9	4-24,697-677	1-3,700-698[UP5]	(((((((((((((((((((((...&...)))))))))))))))))))))	AAUUGUAUGUAUAUCUUUCUAUGU&CUUUGGAGGGAUAUAUAUGCAAUU	1	24.9165	0.858795	0	0	NA	24.9165	0	yes
PC-3p-384229_11	TRINITY_DN99104_c2_g1	32	55	46	-37	-24.2	0.654054	9.5	2-14,54-42;16-20,40-36	1-1,55-55[UP5];15-15,41-41[SIL];21-24,35-32[UP3]	....(((((.(((((((((((((.&.))))))))))))).)))))....	GUUGGCAUGGAUGUCCCUUCAAGC&CUUUGGAGGGAUAUAUAUGCAAUU	0	0	NA	2	54.5316	0.667735	0	54.5316	yes
PC-3p-40233_212	TRINITY_DN112562_c0_g1	133	159	150	-44.7	-29.3	0.655481	10.5	2-3,158-157;5-10,155-150;11-12,148-147;13-24,144-133	1-1,159-159[UP5];4-4,156-156[SIL];x-x,149-149[BULt];x-x,146-145[BULt]	((((((((((((..((.((((((.((.&.)).))))))-))--))))))))))))	GGUUUUGCUGCGUUUGUUUUGGUGUCG&AGGGACCAAA-CA--UGCAGCAAAACC	2	49.8331	0.261948	0	0	NA	49.8331	0	yes
PC-3p-40233_212	TRINITY_DN113681_c0_g1	1715	1736	1727	-44.7	-29.4	0.657718	5.5	2-6,1735-1731;8-19,1729-1718;22-24,1717-1715	1-1,1736-1736[UP5];7-7,1730-1730[SIL];20-21,x-x[BULq]	(((--((((((((((((.(((((.&.))))).))))))))))))..)))	GGU--UGUUGCAUGUUUAGUCCCC&AGGGACCAAACAUGCAGCAAAACC	1	24.9165	0.386997	0	0	NA	24.9165	0	yes
PC-3p-427146_10	TRINITY_DN100519_c3_g2	387	408	400	-33	-25.1	0.760606	7	1-9,408-400;11-22,399-388	10-10,x-x[BULq];23-23,387-387[UP3]	.((((((((((((-(((((((((&))))))))).)))))))))))).	UGGAUGAGGAGAG-GAGGAAGAG&UUUUUUCUCACUCUUCUCAUUUC	3	74.7496	0.344828	2	54.5316	0.369047	74.7496	54.5316	yes
PC-3p-427146_10	TRINITY_DN100519_c3_g2	525	547	539	-33	-22.5	0.681818	9	2-9,546-539;11-18,538-531;20-23,528-525	1-1,547-547[UP5];10-10,x-x[BULq];19-19,530-529[AILt]	((((..((((((((-((((((((.&.)))))))).))))))))-.))))	GAGAGGGGGAAGAG-GAGGAGGAG&UUUUUUCUCACUCUUCUC-AUUUC	0	0	NA	2	54.5316	0.947959	0	54.5316	yes
PC-3p-427146_10	TRINITY_DN100731_c0_g1	29	51	42	-33	-23.2	0.70303	8	1-17,51-35;20-23,32-29	18-19,34-33[SIL]	((((..(((((((((((((((((&)))))))))))))))))..))))	GAAGGCGGAGGAGUGGGGGAGAG&UUUUUUCUCACUCUUCUCAUUUC	0	0	NA	1	27.2658	0.99889	0	27.2658	yes
PC-3p-427146_10	TRINITY_DN101073_c3_g1	263	300	291	-33	-22.8	0.690909	19	2-14,299-287;15-23,271-263	1-1,300-300[UP5];x-x,286-272[BULt]	(((((((((...............(((((((((((((.&.)))))))))))))---------------)))))))))	GGGGUGAGAGUUCAAAGCAAAGCAGGAGUGAGAAGAAG&UUUUUUCUCACUCU---------------UCUCAUUUC	4	99.6661	0.997067	4	109.063	0.99654	99.6661	109.063	yes
PC-3p-427146_10	TRINITY_DN102071_c1_g1	1013	1035	1026	-33	-23.3	0.706061	8	1-10,1035-1026;12-22,1024-1014	11-11,1025-1025[SIL];23-23,1013-1013[UP3]	.(((((((((((.((((((((((&)))))))))).))))))))))).	UGAAUGAGGAGGAUGAGGAGGAA&UUUUUUCUCACUCUUCUCAUUUC	1	24.9165	0.999246	3	81.7974	0.97667	24.9165	81.7974	yes
PC-3p-427146_10	TRINITY_DN103044_c2_g1	39	61	52	-33	-22.5	0.681818	8.5	1-9,61-53;11-18,51-44;20-23,42-39	10-10,52-52[SIL];19-19,43-43[SIL]	((((.((((((((.(((((((((&))))))))).)))))))).))))	GAAGGGAGGAGGGGGAGGAGGAG&UUUUUUCUCACUCUUCUCAUUUC	0	0	NA	5	136.329	0.999018	0	136.329	yes
PC-3p-427146_10	TRINITY_DN103044_c2_g2	563	585	576	-33	-23.1	0.7	7.5	1-8,585-578;11-20,575-566;22-23,564-563	9-10,577-576[SIL];21-21,565-565[SIL]	((.((((((((((..((((((((&))))))))..)))))))))).))	GAUAUGAGAGGAGGCAGGAAGAA&UUUUUUCUCACUCUUCUCAUUUC	6	149.499	0.82405	12	327.189	0.988282	149.499	327.189	yes
PC-3p-427146_10	TRINITY_DN103222_c0_g2	356	379	370	-33	-21.6	0.654545	10.5	2-10,378-370;11-18,368-361	1-1,379-379[UP5];x-x,369-369[BULt];19-23,360-356[UP3]	.....((((((((.(((((((((.&.)))))))))-)))))))).....	UUUAGGAGGAGAGUUGGGAAGAAC&UUUUUUCUCA-CUCUUCUCAUUUC	1	24.9165	1	2	54.5316	0.99405	24.9165	54.5316	yes
PC-3p-427146_10	TRINITY_DN104041_c0_g2	383	404	395	-33	-23.2	0.70303	8.5	1-11,404-394;13-20,393-386	12-12,x-x[BULq];21-23,385-383[UP3]	...((((((((-(((((((((((&))))))))))).))))))))...	CUUAUGAGGAG-GUGAGGAAGGA&UUUUUUCUCACUCUUCUCAUUUC	0	0	NA	1	27.2658	0.998609	0	27.2658	yes
PC-3p-427146_10	TRINITY_DN104596_c2_g1	414	437	428	-33	-21.9	0.663636	12.5	6-7,432-431;9-16,429-422;17-23,420-414	1-5,437-433[UP5];8-8,430-430[SIL];x-x,421-421[BULt]	(((((((.((((((((.((.....&.....)).))))))))-)))))))	GAGAUGAUGAAGAGUGUGAUGGGU&UUUUUUCUCACUCUUC-UCAUUUC	2	49.8331	0.981073	2	54.5316	0.986707	49.8331	54.5316	yes
PC-3p-427146_10	TRINITY_DN104950_c0_g1	1066	1088	1079	-33	-22.2	0.672727	7.5	1-12,1088-1077;14-21,1075-1068;23-23,1066-1066	13-13,1076-1076[SIL];22-22,1067-1067[SIL]	(.((((((((.((((((((((((&)))))))))))).)))))))).)	GUGGUGGGAAAAGUGGGGAGAGA&UUUUUUCUCACUCUUCUCAUUUC	1	24.9165	1	0	0	NA	24.9165	0	yes
PC-3p-427146_10	TRINITY_DN105169_c0_g1	345	367	358	-33	-23	0.69697	13.5	5-18,363-350	1-4,367-364[UP5];19-23,349-345[UP3]	.....((((((((((((((....&....)))))))))))))).....	CAAUGGAGGAGAGUGAGGACAAU&UUUUUUCUCACUCUUCUCAUUUC	1	24.9165	0.999912	0	0	NA	24.9165	0	yes
PC-3p-427146_10	TRINITY_DN105203_c1_g1	435	456	447	-33	-27.2	0.824242	6	2-18,455-439;20-23,438-435	1-1,456-456[UP5];19-19,x-x[BULq]	((((-(((((((((((((((((.&.))))))))))))))))).))))	GGAG-GAGAAGAGUGAGGAGGAC&UUUUUUCUCACUCUUCUCAUUUC	1	24.9165	0.452461	0	0	NA	24.9165	0	yes
PC-3p-427146_10	TRINITY_DN105404_c3_g2	524	546	537	-33	-21.9	0.663636	9.5	3-14,544-533;15-18,531-528;20-23,527-524	1-2,546-545[UP5];x-x,532-532[BULt];19-19,x-x[BULq]	((((-((((.((((((((((((..&..))))))))))))-)))).))))	GAGA-GAGAGAGGGUGAGAGGGUG&UUUUUUCUCACUCU-UCUCAUUUC	1	24.9165	1	0	0	NA	24.9165	0	yes
PC-3p-427146_10	TRINITY_DN105786_c4_g3	455	478	469	-33	-21.7	0.657576	9.5	1-8,478-471;11-13,468-466;14-23,464-455	9-10,470-469[SIL];x-x,465-465[BULt]	((((((((((.(((..((((((((&))))))))..)))-))))))))))	GGAAUGGGAAUGAGGAAGAGAGGG&UUUUUUCUCACUC-UUCUCAUUUC	2	49.8331	0.988159	0	0	NA	49.8331	0	yes
PC-3p-427146_10	TRINITY_DN106146_c0_g3	334	357	347	-33	-25.5	0.772727	7.5	2-9,356-349;10-20,347-337;22-23,335-334	1-1,357-357[UP5];x-x,348-348[BULt];21-21,336-336[SIL]	((.(((((((((((.((((((((.&.))))))))-))))))))))).))	GGUGUGAGAGGAGUAGAGAAGAGG&UUUUUUCUC-ACUCUUCUCAUUUC	0	0	NA	2	54.5316	0.278594	0	54.5316	yes
PC-3p-427146_10	TRINITY_DN108060_c0_g2	224	250	240	-33	-21.7	0.657576	12.5	5-7,246-244;8-18,242-232;19-23,228-224	1-4,250-247[UP5];x-x,243-243[BULt];x-x,231-229[BULt]	(((((...(((((((((((.(((....&....)))-)))))))))))---)))))	GAGAUGUGGAGAAGAGUGAUGAAUAGU&UUUUUUC-UCACUCUUCUC---AUUUC	1	24.9165	1	0	0	NA	24.9165	0	yes
PC-3p-427146_10	TRINITY_DN108505_c2_g1	256	280	271	-33	-21.7	0.657576	8.5	2-10,279-271;11-17,268-262;20-23,259-256	1-1,280-280[UP5];x-x,270-269[BULt];18-19,261-260[SIL]	((((..(((((((..(((((((((.&.)))))))))--)))))))..))))	GAAAGAAGAGGAGAUUGAGAAGAAG&UUUUUUCUCA--CUCUUCUCAUUUC	2	49.8331	0.987789	3	81.7974	0.991752	49.8331	81.7974	yes
PC-3p-427146_10	TRINITY_DN108813_c0_g2	149	170	162	-33	-22.5	0.681818	9	1-7,170-164;9-21,163-151	8-8,x-x[BULq];22-23,150-149[UP3]	..(((((((((((((-(((((((&))))))).)))))))))))))..	GCAAUGGGAAGGGUG-GAGGAGG&UUUUUUCUCACUCUUCUCAUUUC	1	24.9165	0.999998	0	0	NA	24.9165	0	yes
PC-3p-427146_10	TRINITY_DN109009_c0_g2	686	711	700	-33	-22.7	0.687879	10.5	3-9,709-703;10-19,700-691;20-23,689-686	1-2,711-710[UP5];x-x,702-701[BULt];x-x,690-690[BULt]	((((.((((((((((..(((((((..&..)))))))--))))))))))-))))	GAAGCUGAGAAGAGUUUGGGAAGAUC&UUUUUUCUC--ACUCUUCUCA-UUUC	6	149.499	0.998302	2	54.5316	0.997966	149.499	54.5316	yes
PC-3p-427146_10	TRINITY_DN109107_c0_g1	94	122	113	-33	-21.8	0.660606	11	2-17,121-106;18-22,99-95	1-1,122-122[UP5];x-x,105-100[BULt];23-23,94-94[UP3]	.(((((......((((((((((((((((.&.))))))))))))))))------))))).	UAAAUGCUACACAGAAGAGUGGGAGAAGU&UUUUUUCUCACUCUUCU------CAUUUC	3	74.7496	0.999985	0	0	NA	74.7496	0	yes
PC-3p-427146_10	TRINITY_DN109449_c0_g2	694	716	707	-33	-22.7	0.687879	9.5	1-9,716-708;11-19,706-698	10-10,707-707[SIL];20-23,697-694[UP3]	....(((((((((.(((((((((&))))))))).)))))))))....	AUACUGAGGAGAGGGAGAGGGAA&UUUUUUCUCACUCUUCUCAUUUC	0	0	NA	1	27.2658	0.999972	0	27.2658	yes
PC-3p-427146_10	TRINITY_DN109753_c1_g2	1161	1186	1177	-33	-22.3	0.675758	10.5	3-5,1184-1182;7-17,1180-1170;18-23,1166-1161	1-2,1186-1185[UP5];6-6,1181-1181[SIL];x-x,1169-1167[BULt]	((((((...(((((((((((.(((..&..))).)))))))))))---))))))	GAAAUGUUUAGGAGAGUGAGUGAGCA&UUUUUUCUCACUCUUCU---CAUUUC	0	0	NA	6	163.595	0.99968	0	163.595	yes
PC-3p-427146_10	TRINITY_DN110030_c2_g4	135	160	151	-33	-22.5	0.681818	14	4-11,157-150;12-22,146-136	1-3,160-158[UP5];x-x,149-147[BULt];23-23,135-135[UP3]	.(((((((((((...((((((((...&...))))))))---))))))))))).	AGGAUGAGAAGAUAGGUGAGAAGUUG&UUUUUUCUCAC---UCUUCUCAUUUC	55	1370.41	0.935734	10	272.658	0.949673	1370.41	272.658	yes
PC-3p-427146_10	TRINITY_DN110342_c1_g1	204	227	218	-33	-22.8	0.690909	9	3-9,225-219;11-19,217-209;20-23,207-204	1-2,227-226[UP5];10-10,218-218[SIL];x-x,208-208[BULt]	((((.(((((((((.(((((((..&..))))))).)))))))))-))))	GAGAUUGAGGAGAGGGAGAAGGUA&UUUUUUCUCACUCUUCUCA-UUUC	1	24.9165	0.999988	0	0	NA	24.9165	0	yes
PC-3p-427146_10	TRINITY_DN110667_c0_g2	569	591	582	-33	-21.8	0.660606	9.5	2-17,590-575	1-1,591-591[UP5];18-23,574-569[UP3]	......((((((((((((((((.&.))))))))))))))))......	ACAACCAGGAGGGUGAGAGAAAU&UUUUUUCUCACUCUUCUCAUUUC	1	24.9165	1	0	0	NA	24.9165	0	yes
PC-3p-427146_10	TRINITY_DN110899_c0_g1	1221	1243	1234	-33	-21.6	0.654545	10.5	2-7,1242-1237;9-18,1235-1226	1-1,1243-1243[UP5];8-8,1236-1236[SIL];19-23,1225-1221[UP3]	.....((((((((((.((((((.&.)))))).)))))))))).....	AAUCCGGGAAGAGUGCGAGAGAC&UUUUUUCUCACUCUUCUCAUUUC	0	0	NA	1	27.2658	1	0	27.2658	yes
PC-3p-427146_10	TRINITY_DN111025_c0_g1	1210	1232	1223	-33	-21.5	0.651515	8.5	2-12,1231-1221;14-22,1219-1211	1-1,1232-1232[UP5];13-13,1220-1220[SIL];23-23,1210-1210[UP3]	.(((((((((.(((((((((((.&.))))))))))).))))))))).	AAGGUGAGGAAGGUGGGAAAGGU&UUUUUUCUCACUCUUCUCAUUUC	1	24.9165	1	3	81.7974	0.999998	24.9165	81.7974	yes
PC-3p-427146_10	TRINITY_DN111351_c1_g5	17	39	30	-33	-21.8	0.660606	10	2-17,38-23	1-1,39-39[UP5];18-23,22-17[UP3]	......((((((((((((((((.&.))))))))))))))))......	GCUCAAAGAAGAGUGGGAAAGGG&UUUUUUCUCACUCUUCUCAUUUC	1	24.9165	1	0	0	NA	24.9165	0	yes
PC-3p-427146_10	TRINITY_DN111770_c0_g1	1097	1119	1110	-33	-22.3	0.675758	6	1-15,1119-1105;17-20,1103-1100	16-16,1104-1104[SIL];21-23,1099-1097[UP3]	...((((.(((((((((((((((&))))))))))))))).))))...	UGUAUGAUAAGAGUGGGAAAGAA&UUUUUUCUCACUCUUCUCAUUUC	2	49.8331	0.999671	1	27.2658	0.999997	49.8331	27.2658	yes
PC-3p-427146_10	TRINITY_DN111806_c1_g1	910	930	922	-33	-24.1	0.730303	5.5	1-9,930-922;11-18,921-914;20-23,913-910	10-10,x-x[BULq];19-19,x-x[BULq]	((((-((((((((-(((((((((&))))))))).)))))))).))))	GAAA-GAGAAGAG-GAGGAGAAG&UUUUUUCUCACUCUUCUCAUUUC	4	99.6661	0.547015	2	54.5316	0.577867	99.6661	54.5316	yes
PC-3p-427146_10	TRINITY_DN111977_c0_g1	829	851	842	-33	-25.7	0.778788	10.5	4-21,848-831	1-3,851-849[UP5];22-23,830-829[UP3]	..((((((((((((((((((...&...))))))))))))))))))..	UUGGUGAGGAGAGUGGGAAGUUG&UUUUUUCUCACUCUUCUCAUUUC	2	49.8331	0.50773	1	27.2658	0.676509	49.8331	27.2658	yes
PC-3p-427146_10	TRINITY_DN112302_c0_g3	1671	1693	1684	-33	-21.5	0.651515	6.5	1-8,1693-1686;10-13,1684-1681;15-23,1679-1671	9-9,1685-1685[SIL];14-14,1680-1680[SIL]	(((((((((.((((.((((((((&)))))))).)))).)))))))))	GGGAUGAGACGGGUAAGAAAAGG&UUUUUUCUCACUCUUCUCAUUUC	1	24.9165	1	0	0	NA	24.9165	0	yes
PC-3p-427146_10	TRINITY_DN112463_c0_g1	1413	1434	1425	-33	-21.6	0.654545	6.5	2-15,1433-1420;18-22,1418-1414	1-1,1434-1434[UP5];16-17,1419-1419[AILq];23-23,1413-1413[UP3]	.(((((.-((((((((((((((.&.))))))))))))))..))))).	UAGGUGU-GAGAGUGAGAAAGAG&UUUUUUCUCACUCUUCUCAUUUC	0	0	NA	1	27.2658	1	0	27.2658	yes
PC-3p-427146_10	TRINITY_DN112529_c2_g2	263	288	279	-33	-22.1	0.669697	9.5	2-14,287-275;15-19,271-267	1-1,288-288[UP5];x-x,274-272[BULt];20-23,266-263[UP3]	....(((((...(((((((((((((.&.)))))))))))))---)))))....	CGUUUGAGGACAAGAGUGAGAAGAAG&UUUUUUCUCACUCU---UCUCAUUUC	9	224.249	0.99989	3	81.7974	0.9769	224.249	81.7974	yes
PC-3p-427146_10	TRINITY_DN113564_c1_g3	91	113	104	-33	-21.5	0.651515	16	7-20,107-94	1-6,113-108[UP5];21-23,93-91[UP3]	...((((((((((((((......&......))))))))))))))...	GCUGUGGGAAGAGUGGGUUCGAG&UUUUUUCUCACUCUUCUCAUUUC	0	0	NA	2	54.5316	0.999998	0	54.5316	yes
PC-3p-427146_10	TRINITY_DN113770_c2_g2	828	851	842	-33	-21.6	0.654545	11	3-7,849-845;9-16,843-836;17-23,834-828	1-2,851-850[UP5];8-8,844-844[SIL];x-x,835-835[BULt]	(((((((.((((((((.(((((..&..))))).))))))))-)))))))	GGGGUGACGAGGGGUGUGAGGAUG&UUUUUUCUCACUCUUC-UCAUUUC	2	49.8331	0.991159	0	0	NA	49.8331	0	yes
PC-3p-427146_10	TRINITY_DN114084_c1_g2	136	157	149	-33	-21.7	0.657576	9	3-9,155-149;11-18,148-141;20-23,139-136	1-2,157-156[UP5];10-10,x-x[BULq];19-19,140-140[SIL]	((((.((((((((-(((((((..&..))))))).)))))))).))))	GAAACGGGAGGAG-GAGAAGGCU&UUUUUUCUCACUCUUCUCAUUUC	2	49.8331	0.988429	1	27.2658	1	49.8331	27.2658	yes
PC-3p-427146_10	TRINITY_DN114349_c0_g2	462	491	475	-33	-22	0.666667	20	2-8,490-484;9-21,476-464	1-1,491-491[UP5];x-x,483-477[BULt];22-23,463-462[UP3]	..(((((((((((((.......(((((((.&.)))))))-------)))))))))))))..	UUGGUGAGAAGAGUGGUGUGGUGGAAGAAG&UUUUUUCU-------CACUCUUCUCAUUUC	0	0	NA	1	27.2658	1	0	27.2658	yes
PC-3p-427146_10	TRINITY_DN116230_c0_g1	582	604	595	-33	-24.6	0.745455	7.5	3-12,602-593;14-23,591-582	1-2,604-603[UP5];13-13,592-592[SIL]	((((((((((.((((((((((..&..)))))))))).))))))))))	GGAGUGAGGACAGUGGGAGAACU&UUUUUUCUCACUCUUCUCAUUUC	2	49.8331	0.75767	0	0	NA	49.8331	0	yes
PC-3p-427146_10	TRINITY_DN116727_c3_g4	112	134	125	-33	-29.1	0.881818	4.5	1-21,134-114	22-23,113-112[UP3]	..(((((((((((((((((((((&)))))))))))))))))))))..	UUAAUGAGAAGGGUGAGAAGAAG&UUUUUUCUCACUCUUCUCAUUUC	1	24.9165	0.171572	0	0	NA	24.9165	0	yes
PC-3p-427146_10	TRINITY_DN116925_c0_g2	896	917	908	-33	-23.4	0.709091	7.5	1-16,917-902;18-21,901-898	17-17,x-x[BULq];22-23,897-896[UP3]	..((((-((((((((((((((((&)))))))))))))))).))))..	ACAAUG-GAAGAGUGGGAGGAGG&UUUUUUCUCACUCUUCUCAUUUC	0	0	NA	2	54.5316	0.957901	0	54.5316	yes
PC-3p-427146_10	TRINITY_DN117798_c1_g2	914	937	928	-33	-22.7	0.687879	9	2-8,936-930;11-17,927-921;18-23,919-914	1-1,937-937[UP5];9-10,929-928[SIL];x-x,920-920[BULt]	((((((.(((((((..(((((((.&.)))))))..)))))))-))))))	GAAGUGAAGGAGAGGAAGGAGAAU&UUUUUUCUCACUCUUCU-CAUUUC	6	149.499	0.99837	1	27.2658	0.999964	149.499	27.2658	yes
PC-3p-427146_10	TRINITY_DN118011_c0_g1	579	600	592	-33	-22.4	0.678788	9.5	1-9,600-592;11-18,591-584	10-10,x-x[BULq];19-23,583-579[UP3]	.....((((((((-(((((((((&))))))))).)))))))).....	UCCCCGAGAGGAG-GAGAAGGAA&UUUUUUCUCACUCUUCUCAUUUC	1	24.9165	0.999999	1	27.2658	0.999993	24.9165	27.2658	yes
PC-3p-427146_10	TRINITY_DN118678_c0_g1	725	747	738	-33	-27.3	0.827273	7.5	2-7,746-741;9-23,739-725	1-1,747-747[UP5];8-8,740-740[SIL]	(((((((((((((((.((((((.&.)))))).)))))))))))))))	GAGAUGGGGAGAGUGUGGAGGAU&UUUUUUCUCACUCUUCUCAUUUC	0	0	NA	1	27.2658	0.363285	0	27.2658	yes
PC-3p-427146_10	TRINITY_DN118739_c1_g1	1664	1687	1678	-33	-23.3	0.706061	9.5	1-10,1687-1678;11-18,1676-1669	x-x,1677-1677[BULt];19-23,1668-1664[UP3]	.....((((((((.((((((((((&))))))))))-)))))))).....	UGUUAGAGAGGAGUUGAGGAAAGA&UUUUUUCUCA-CUCUUCUCAUUUC	1	24.9165	0.998981	2	54.5316	0.783959	24.9165	54.5316	yes
PC-3p-427146_10	TRINITY_DN119396_c0_g1	41	63	54	-33	-23.4	0.709091	6.5	1-12,63-52;14-22,50-42	13-13,51-51[SIL];23-23,41-41[UP3]	.(((((((((.((((((((((((&)))))))))))).))))))))).	AAGAUGAGGAUAGUGAGGAGGAG&UUUUUUCUCACUCUUCUCAUUUC	0	0	NA	1	27.2658	0.99511	0	27.2658	yes
PC-3p-427146_10	TRINITY_DN119563_c1_g1	1266	1288	1279	-33	-21.6	0.654545	9	1-9,1288-1280;11-18,1278-1271	10-10,1279-1279[SIL];19-23,1270-1266[UP3]	.....((((((((.(((((((((&))))))))).)))))))).....	UCUUAGAGAAGAGAGGGAAGAAA&UUUUUUCUCACUCUUCUCAUUUC	2	49.8331	0.999997	4	109.063	0.999996	49.8331	109.063	yes
PC-3p-427146_10	TRINITY_DN119774_c0_g1	891	913	903	-33	-22.8	0.690909	8.5	3-9,911-905;10-18,903-895;20-23,894-891	1-2,913-912[UP5];x-x,904-904[BULt];19-19,x-x[BULq]	((((-(((((((((.(((((((..&..)))))))-))))))))).))))	GAAG-GAGAAGAGUAGAGGGAAUU&UUUUUUCUC-ACUCUUCUCAUUUC	2	49.8331	0.894071	0	0	NA	49.8331	0	yes
PC-3p-427146_10	TRINITY_DN119799_c1_g1	862	884	874	-33	-22.1	0.669697	6	1-8,884-877;9-15,875-869;17-23,868-862	x-x,876-876[BULt];16-16,x-x[BULq]	(((((((-(((((((.((((((((&))))))))-))))))).)))))))	GGAAUGA-AGGAGUGUAGGAAGAA&UUUUUUCU-CACUCUUCUCAUUUC	1	24.9165	1	0	0	NA	24.9165	0	yes
PC-3p-427146_10	TRINITY_DN120030_c1_g1	137	158	150	-33	-23	0.69697	9.5	1-9,158-150;11-19,149-141	10-10,x-x[BULq];20-23,140-137[UP3]	....(((((((((-(((((((((&))))))))).)))))))))....	CCCCUGAGGAGAG-GAGAGGAGA&UUUUUUCUCACUCUUCUCAUUUC	1	24.9165	0.999924	0	0	NA	24.9165	0	yes
PC-3p-427146_10	TRINITY_DN120126_c0_g1	372	394	385	-33	-23.8	0.721212	14	7-21,388-374	1-6,394-389[UP5];22-23,373-372[UP3]	..(((((((((((((((......&......)))))))))))))))..	UUGAUGAGGAGAGUGAGUUUAGU&UUUUUUCUCACUCUUCUCAUUUC	1	24.9165	0.989874	1	27.2658	0.980433	24.9165	27.2658	yes
PC-3p-427146_10	TRINITY_DN120189_c1_g1	243	265	256	-33	-24.9	0.754545	11	4-20,262-246	1-3,265-263[UP5];21-23,245-243[UP3]	...(((((((((((((((((...&...)))))))))))))))))...	GCUAUGAGAAGAGUGAGGGGUUC&UUUUUUCUCACUCUUCUCAUUUC	1	24.9165	0.906672	0	0	NA	24.9165	0	yes
PC-3p-427146_10	TRINITY_DN120379_c1_g2	231	254	244	-33	-21.9	0.663636	9.5	1-7,254-248;9-9,246-246;10-20,244-234	8-8,247-247[SIL];x-x,245-245[BULt];21-23,233-231[UP3]	...(((((((((((.(.(((((((&))))))).)-)))))))))))...	CACGUGAGAAGAGUCGUGAAGAGA&UUUUUUCUC-ACUCUUCUCAUUUC	1	24.9165	1	0	0	NA	24.9165	0	yes
PC-3p-427146_10	TRINITY_DN120493_c0_g2	256	281	272	-33	-21.9	0.663636	10	2-14,280-268;15-18,264-261	1-1,281-281[UP5];x-x,267-265[BULt];19-23,260-256[UP3]	.....((((...(((((((((((((.&.)))))))))))))---)))).....	GUGUCGAGAAUGAGAGUGAGAAAGAU&UUUUUUCUCACUCU---UCUCAUUUC	0	0	NA	1	27.2658	1	0	27.2658	yes
PC-3p-427146_10	TRINITY_DN120616_c2_g5	499	525	516	-33	-21.8	0.660606	6	1-10,525-516;11-16,514-509;17-19,506-504;20-23,502-499	x-x,515-515[BULt];x-x,508-507[BULt];x-x,503-503[BULt]	((((.(((..((((((.((((((((((&))))))))))-))))))--)))-))))	GAAACUGACAGAAGAGUUGAGAAAAGA&UUUUUUCUCA-CUCUUC--UCA-UUUC	1	24.9165	1	1	27.2658	1	24.9165	27.2658	yes
PC-3p-427146_10	TRINITY_DN120669_c0_g1	726	752	743	-33	-21.6	0.654545	14	2-12,751-741;13-21,737-729;22-23,727-726	1-1,752-752[UP5];x-x,740-738[BULt];x-x,728-728[BULt]	((.(((((((((...(((((((((((.&.)))))))))))---)))))))))-))	GAUGAUGAGGAGGAUGGUGGGGAGGAU&UUUUUUCUCACU---CUUCUCAUU-UC	0	0	NA	2	54.5316	0.999995	0	54.5316	yes
PC-3p-427146_10	TRINITY_DN120724_c1_g1	221	243	234	-33	-25.4	0.769697	7	2-7,242-237;9-22,235-222	1-1,243-243[UP5];8-8,236-236[SIL];23-23,221-221[UP3]	.((((((((((((((.((((((.&.)))))).)))))))))))))).	CGAGUGAGGGGAGUGCGAAGAAG&UUUUUUCUCACUCUUCUCAUUUC	3	74.7496	0.572787	1	27.2658	0.741872	74.7496	27.2658	yes
PC-3p-427146_10	TRINITY_DN120764_c1_g1	1597	1619	1609	-33	-22.6	0.684848	9.5	4-9,1616-1611;10-18,1609-1601;20-23,1600-1597	1-3,1619-1617[UP5];x-x,1610-1610[BULt];19-19,x-x[BULq]	((((-(((((((((.((((((...&...))))))-))))))))).))))	GAAG-GAGAAGAGUAGAGAAGCUG&UUUUUUCUC-ACUCUUCUCAUUUC	0	0	NA	6	163.595	0.998456	0	163.595	yes
PC-3p-427146_10	TRINITY_DN120769_c0_g3	275	303	294	-33	-22.9	0.693939	12	1-11,303-293;12-18,289-283;19-23,279-275	x-x,292-290[BULt];x-x,282-280[BULt]	(((((...(((((((...(((((((((((&)))))))))))---)))))))---)))))	GAGAUGUGGAGAAGAGCCGUGAGAGAGAG&UUUUUUCUCAC---UCUUCUC---AUUUC	0	0	NA	1	27.2658	0.999771	0	27.2658	yes
PC-3p-427146_10	TRINITY_DN121213_c0_g3	345	371	362	-33	-22.2	0.672727	11	3-16,369-356;17-22,351-346	1-2,371-370[UP5];x-x,355-352[BULt];23-23,345-345[UP3]	.((((((....((((((((((((((..&..))))))))))))))----)))))).	AAGGUGAUUCUGAAGGGUGAGAGAACU&UUUUUUCUCACUCUUC----UCAUUUC	1	24.9165	1	0	0	NA	24.9165	0	yes
PC-3p-427146_10	TRINITY_DN121394_c1_g3	65	87	78	-33	-22.8	0.690909	8.5	1-17,87-71	18-23,70-65[UP3]	......(((((((((((((((((&)))))))))))))))))......	AGCACAAGGAGGGUGAGAAGAAA&UUUUUUCUCACUCUUCUCAUUUC	29	722.579	0.996481	84	2290.33	0.99587	722.579	2290.33	yes
PC-3p-427146_10	TRINITY_DN121529_c14_g1	1971	1993	1984	-33	-28	0.848485	5	2-13,1992-1981;15-23,1979-1971	1-1,1993-1993[UP5];14-14,1980-1980[SIL]	(((((((((.((((((((((((.&.)))))))))))).)))))))))	GAGAUGAGGUGAGUGGGAAGAAC&UUUUUUCUCACUCUUCUCAUUUC	206	5132.81	0.0596531	167	4553.39	0.064791	5132.81	4553.39	yes
PC-3p-427146_10	TRINITY_DN121821_c0_g1	677	705	696	-33	-23.1	0.7	19	3-10,703-696;11-23,689-677	1-2,705-704[UP5];x-x,695-690[BULt]	(((((((((((((......((((((((..&..))))))))------)))))))))))))	GAGGUGGGGAGAGGCUUAAUGAGGAAGUU&UUUUUUCUCA------CUCUUCUCAUUUC	2	49.8331	0.817155	3	81.7974	0.842836	49.8331	81.7974	yes
PC-3p-427146_10	TRINITY_DN122036_c3_g2	19	42	33	-33	-23.8	0.721212	7	1-17,42-26;18-18,24-24;20-23,22-19	x-x,25-25[BULt];19-19,23-23[SIL]	((((.(.(((((((((((((((((&)))))))))))))))))-).))))	GAGAAGAAGAAGGGUGGGAAGGAG&UUUUUUCUCACUCUUCU-CAUUUC	1	24.9165	0.990249	0	0	NA	24.9165	0	yes
PC-3p-427146_10	TRINITY_DN122121_c1_g1	1297	1320	1311	-33	-22.3	0.675758	10	4-17,1317-1304;18-19,1302-1301;21-23,1299-1297	1-3,1320-1318[UP5];x-x,1303-1303[BULt];20-20,1300-1300[SIL]	(((.((.((((((((((((((...&...))))))))))))))-)).)))	GAGCUGUAGGAGAGUGAGGAGUUU&UUUUUUCUCACUCUUCU-CAUUUC	1	24.9165	1	0	0	NA	24.9165	0	yes
PC-3p-427146_10	TRINITY_DN123186_c2_g1	770	795	786	-33	-22	0.666667	13.5	4-14,792-782;15-22,778-771	1-3,795-793[UP5];x-x,781-779[BULt];23-23,770-770[UP3]	.((((((((...(((((((((((...&...)))))))))))---)))))))).	UGAGUGAGAUGAGGAGUGAGGGGUAU&UUUUUUCUCACUCU---UCUCAUUUC	1	24.9165	1	2	54.5316	0.999953	24.9165	54.5316	yes
PC-3p-427146_10	TRINITY_DN124101_c3_g1	65	90	80	-33	-22.3	0.675758	10.5	2-7,89-84;8-10,82-80;11-23,77-65	1-1,90-90[UP5];x-x,83-83[BULt];x-x,79-78[BULt]	(((((((((((((..(((.((((((.&.))))))-)))--)))))))))))))	GGAAUGGGGAGAGAAUGACGAGGAAU&UUUUUUC-UCA--CUCUUCUCAUUUC	0	0	NA	5	136.329	0.999553	0	136.329	yes
PC-3p-427146_10	TRINITY_DN124536_c2_g1	556	578	569	-33	-22.3	0.675758	8	2-8,577-571;11-18,568-561;21-23,558-556	1-1,578-578[UP5];9-10,570-569[SIL];19-20,560-559[SIL]	(((..((((((((..(((((((.&.)))))))..))))))))..)))	GGAUGGAGGAGAGGAAGAAAAAG&UUUUUUCUCACUCUUCUCAUUUC	1	24.9165	1	0	0	NA	24.9165	0	yes
PC-3p-427146_10	TRINITY_DN125051_c2_g3	783	807	798	-33	-22.78	0.690303	14	6-18,802-790;21-23,785-783	1-5,807-803[UP5];19-20,789-786[AILt]	(((....(((((((((((((.....&.....)))))))))))))--..)))	GGAUGAGGAGGAGAGUGAGAUUGUG&UUUUUUCUCACUCUUCUC--AUUUC	1	24.9165	0.99999	0	0	NA	24.9165	0	yes
PC-3p-427146_10	TRINITY_DN88706_c0_g1	904	928	919	-33	-24.2	0.733333	9.5	3-16,926-913;17-23,910-904	1-2,928-927[UP5];x-x,912-911[BULt]	(((((((..((((((((((((((..&..))))))))))))))--)))))))	GGAGUGGUUGAAGGGUGGGAAGAUG&UUUUUUCUCACUCUUC--UCAUUUC	1	24.9165	0.973054	0	0	NA	24.9165	0	yes
PC-3p-427146_10	TRINITY_DN90427_c0_g1	43	65	56	-33	-22.9	0.693939	10	5-16,61-50;19-23,47-43	1-4,65-62[UP5];17-18,49-48[SIL]	(((((..((((((((((((....&....))))))))))))..)))))	GAGAUAUGGAGAGUGAGAAUUUG&UUUUUUCUCACUCUUCUCAUUUC	1	24.9165	0.999946	0	0	NA	24.9165	0	yes
PC-3p-427146_10	TRINITY_DN90836_c2_g7	133	156	147	-33	-26.8	0.812121	5	1-3,156-154;5-10,152-147;11-23,145-133	4-4,153-153[SIL];x-x,146-146[BULt]	(((((((((((((.((((((.(((&))).))))))-)))))))))))))	GAGGUGAGAAGAGUUGAGAACAAA&UUUUUUCUCA-CUCUUCUCAUUUC	4	99.6661	0.149095	0	0	NA	99.6661	0	yes
PC-3p-427146_10	TRINITY_DN91459_c0_g3	1299	1320	1312	-33	-21.9	0.663636	7.5	1-9,1320-1312;11-17,1311-1305;20-23,1302-1299	10-10,x-x[BULq];18-19,1304-1303[SIL]	((((..(((((((-(((((((((&))))))))).)))))))..))))	GGAAGAAGAAGAG-GAGGAGGAA&UUUUUUCUCACUCUUCUCAUUUC	2	49.8331	0.983135	1	27.2658	1	49.8331	27.2658	yes
PC-3p-427146_10	TRINITY_DN91960_c1_g3	174	195	186	-33	-21.7	0.657576	9	4-16,192-180;18-20,179-177;22-23,175-174	1-3,195-193[UP5];17-17,x-x[BULq];21-21,176-176[SIL]	((.(((-(((((((((((((...&...))))))))))))).))).))	GACAUG-GAAGGGUGAGGAAUGU&UUUUUUCUCACUCUUCUCAUUUC	2	49.8331	0.989689	13	354.455	0.999992	49.8331	354.455	yes
PC-3p-427146_10	TRINITY_DN93079_c0_g1	678	699	690	-33	-21.9	0.663636	7.5	2-13,698-687;16-22,685-679	1-1,699-699[UP5];14-15,686-686[AILq];23-23,678-678[UP3]	.(((((((.-((((((((((((.&.))))))))))))..))))))).	UGAAUGAGC-GAGUGAGAAGGGC&UUUUUUCUCACUCUUCUCAUUUC	3	74.7496	0.999979	1	27.2658	1	74.7496	27.2658	yes
PC-3p-427146_10	TRINITY_DN93345_c0_g1	490	516	507	-33	-22.3	0.675758	13	2-10,515-507;11-18,502-495;20-23,493-490	1-1,516-516[UP5];x-x,506-503[BULt];19-19,494-494[SIL]	((((.((((((((....(((((((((.&.)))))))))----)))))))).))))	GAAGCGAGAGGAGAAGUUGAGGAAAGC&UUUUUUCUCA----CUCUUCUCAUUUC	2	49.8331	0.999742	0	0	NA	49.8331	0	yes
PC-3p-427146_10	TRINITY_DN93836_c1_g1	236	265	255	-33	-22.6	0.684848	12	1-9,265-257;11-15,254-250;16-23,243-236	10-10,256-255[AILt];x-x,249-244[BULt]	((((((((......(((((..(((((((((&)))))))))-.)))))------))))))))	GAGAUGAGGGAAGAGAGAGGCGAGAGAAAA&UUUUUUCUC-ACUCUU------CUCAUUUC	1	24.9165	0.999996	0	0	NA	24.9165	0	yes
PC-3p-427146_10	TRINITY_DN93844_c1_g2	1330	1355	1346	-33	-23	0.69697	14	5-14,1351-1342;15-23,1338-1330	1-4,1355-1352[UP5];x-x,1341-1339[BULt]	(((((((((...((((((((((....&....))))))))))---)))))))))	GGGGUGAGAAAUGGAGUGAGGGCAUU&UUUUUUCUCACUCU---UCUCAUUUC	0	0	NA	1	27.2658	0.999471	0	27.2658	yes
PC-3p-427146_10	TRINITY_DN95911_c1_g2	448	473	464	-33	-22	0.666667	12	2-12,472-462;13-18,458-453;20-23,451-448	1-1,473-473[UP5];x-x,461-459[BULt];19-19,452-452[SIL]	((((.((((((...(((((((((((.&.)))))))))))---)))))).))))	GAAGGGAGGAGCAUAGUGAGGAGAGG&UUUUUUCUCACU---CUUCUCAUUUC	1	24.9165	1	0	0	NA	24.9165	0	yes
PC-3p-427146_10	TRINITY_DN96013_c1_g1	340	362	353	-33	-21.7	0.657576	12	5-11,358-352;13-20,351-344;21-23,342-340	1-4,362-359[UP5];12-12,x-x[BULq];x-x,343-343[BULt]	(((.((((((((-(((((((....&....))))))).))))))))-)))	GAGUAUGAGAGG-GUGAGAGCUGG&UUUUUUCUCACUCUUCUCAU-UUC	1	24.9165	1	0	0	NA	24.9165	0	yes
PC-3p-427146_10	TRINITY_DN96256_c0_g1	201	223	214	-33	-22.7	0.687879	7	1-13,223-211;15-18,209-206	14-14,210-210[SIL];19-23,205-201[UP3]	.....((((.(((((((((((((&))))))))))))).)))).....	AACAAGAGACGAGUGGGAAAAAA&UUUUUUCUCACUCUUCUCAUUUC	0	0	NA	4	109.063	0.997799	0	109.063	yes
PC-3p-427146_10	TRINITY_DN96731_c0_g4	628	654	645	-33	-23.3	0.706061	9.5	1-13,654-642;14-22,637-629	x-x,641-638[BULt];23-23,628-628[UP3]	.(((((((((....(((((((((((((&)))))))))))))----))))))))).	UGAAUGAGGAUUUUGAGUGGGAGGAAG&UUUUUUCUCACUC----UUCUCAUUUC	0	0	NA	1	27.2658	0.99808	0	27.2658	yes
PC-3p-427146_10	TRINITY_DN96915_c1_g1	162	183	174	-33	-21.6	0.654545	5.5	2-12,182-172;14-18,170-166;20-23,165-162	1-1,183-183[UP5];13-13,171-171[SIL];19-19,x-x[BULq]	((((-(((((.(((((((((((.&.))))))))))).))))).))))	GAAA-GAGGAUAGUGAGGAAGAU&UUUUUUCUCACUCUUCUCAUUUC	1	24.9165	1	0	0	NA	24.9165	0	yes
PC-3p-427146_10	TRINITY_DN96915_c1_g1	193	220	207	-33	-22.9	0.693939	14	2-7,219-214;8-21,209-196;22-23,194-193	1-1,220-220[UP5];x-x,213-210[BULt];x-x,195-195[BULt]	((.((((((((((((((....((((((.&.))))))----))))))))))))))-))	GACAGUGAGGAGAGUGAUGGCGAGGAGG&UUUUUUC----UCACUCUUCUCAUU-UC	1	24.9165	0.999942	0	0	NA	24.9165	0	yes
PC-3p-427146_10	TRINITY_DN97655_c1_g2	1294	1319	1310	-33	-22.4	0.678788	8	2-14,1318-1306;15-18,1301-1298;20-23,1297-1294	1-1,1319-1319[UP5];x-x,1305-1302[BULt];19-19,x-x[BULq]	((((-((((....(((((((((((((.&.)))))))))))))----)))).))))	GAAG-GAGAAGCUGGAGUGAGAAAAGU&UUUUUUCUCACUCU----UCUCAUUUC	1	24.9165	0.999999	9	245.392	0.999254	24.9165	245.392	yes
PC-3p-427146_10	TRINITY_DN97962_c0_g1	528	553	544	-33	-22.5	0.681818	11.5	3-11,551-543;12-18,539-533;20-23,531-528	1-2,553-552[UP5];x-x,542-540[BULt];19-19,532-532[SIL]	((((.(((((((...(((((((((..&..)))))))))---))))))).))))	GAAGGGAGAAGAUCAGUGAGAGAAUG&UUUUUUCUCAC---UCUUCUCAUUUC	1	24.9165	0.999998	0	0	NA	24.9165	0	yes
PC-3p-427146_10	TRINITY_DN97985_c0_g1	1021	1043	1034	-33	-24.4	0.739394	6	1-16,1043-1028;18-19,1026-1025	17-17,1027-1027[SIL];20-23,1024-1021[UP3]	....((.((((((((((((((((&)))))))))))))))).))....	CAUCUGUGAAGAGUGAGAAGAAA&UUUUUUCUCACUCUUCUCAUUUC	0	0	NA	3	81.7974	0.800788	0	81.7974	yes
PC-3p-427146_10	TRINITY_DN98171_c1_g3	2022	2043	2034	-33	-22.5	0.681818	5.5	1-10,2043-2034;12-13,2033-2032;15-23,2030-2022	11-11,x-x[BULq];14-14,2031-2031[SIL]	(((((((((.((-((((((((((&)))))))))).)).)))))))))	GAAAUGGGAUGA-UGAGAAGGAA&UUUUUUCUCACUCUUCUCAUUUC	0	0	NA	1	27.2658	0.999991	0	27.2658	yes
PC-3p-427146_10	TRINITY_DN99247_c3_g1	399	423	414	-33	-23.2	0.70303	9.5	3-13,421-411;14-16,409-407;17-23,405-399	1-2,423-422[UP5];x-x,410-410[BULt];x-x,406-406[BULt]	(((((((.(((.(((((((((((..&..)))))))))))-)))-)))))))	GAGAUGAUGAAGGAGUGGGAGGGUG&UUUUUUCUCACUC-UUC-UCAUUUC	16	398.664	0.984569	0	0	NA	398.664	0	yes
PC-3p-427146_10	TRINITY_DN99536_c0_g1	779	804	795	-33	-22.1	0.669697	10.5	1-15,804-790;16-21,786-781;23-23,779-779	x-x,789-787[BULt];22-22,780-780[SIL]	(.((((((...(((((((((((((((&)))))))))))))))---)))))).)	GUGAUGAGGGUGAGGGUGAGGGAGGG&UUUUUUCUCACUCUU---CUCAUUUC	1	24.9165	1	0	0	NA	24.9165	0	yes
PC-3p-427146_10	TRINITY_DN99740_c3_g2	460	486	475	-33	-21.7	0.657576	9.5	1-9,486-478;10-14,475-471;15-22,468-461	x-x,477-476[BULt];x-x,470-469[BULt];23-23,460-460[UP3]	.((((((((..(((((..(((((((((&)))))))))--)))))--)))))))).	AAGAUGAGAAAAGAGUUUGAGAGAAGA&UUUUUUCUC--ACUCU--UCUCAUUUC	0	0	NA	1	27.2658	1	0	27.2658	yes
PC-3p-4450_1419	TRINITY_DN100296_c0_g1	1275	1305	1294	-38	-27.5	0.723684	16.5	2-5,1304-1301;6-11,1298-1293;12-24,1287-1275	1-1,1305-1305[UP5];x-x,1300-1299[BULt];x-x,1292-1288[BULt]	(((((((((((((.....((((((..((((.&.))))--))))))-----)))))))))))))	GCACAAGUUGAGCCCAUUGCAUCAGUAAAGC&ACUUU--UGAUGU-----GCUUAACUUGUGC	0	0	NA	3	81.7974	0.162286	0	81.7974	yes
PC-3p-4450_1419	TRINITY_DN106867_c0_g1	341	364	356	-38	-26.9	0.707895	8	3-8,362-357;10-15,356-351;16-24,349-341	1-2,364-363[UP5];9-9,x-x[BULq];x-x,350-350[BULt]	(((((((((.((((((-((((((..&..)))))).))))))-)))))))))	GCACAGGUUCGAGCAC-UCAAGAAG&ACUUUUGAUGUGCUU-AACUUGUGC	0	0	NA	1	27.2658	0.32087	0	27.2658	yes
PC-3p-4450_1419	TRINITY_DN112613_c0_g3	591	614	605	-38	-24.8	0.652632	10.5	4-10,611-605;12-23,604-593;24-24,591-591	1-3,614-612[UP5];11-11,x-x[BULq];x-x,592-592[BULt]	(.((((((((((((-(((((((...&...))))))).))))))))))))-)	GUCACAAGUUAGGC-CAUCAGGUAU&ACUUUUGAUGUGCUUAACUUGUG-C	0	0	NA	1	27.2658	0.835646	0	27.2658	yes
PC-3p-4450_1419	TRINITY_DN114448_c1_g3	325	350	340	-38	-25.1	0.660526	10.5	2-7,349-344;9-17,341-333;18-24,331-325	1-1,350-350[UP5];8-8,343-342[AILt];x-x,332-332[BULt]	(((((((.(((((((((..((((((.&.))))))-.)))))))))-)))))))	GUACGAGUUUGAGCACGCCCGAAGGG&ACUUUUG-AUGUGCUUAA-CUUGUGC	4	99.6661	0.259066	6	163.595	0.278594	99.6661	163.595	yes
PC-3p-4450_1419	TRINITY_DN115644_c0_g1	1207	1229	1220	-38	-25.4	0.668421	7.5	2-15,1228-1215;19-24,1212-1207	1-1,1229-1229[UP5];16-18,1214-1213[AILq]	((((((..-((((((((((((((.&.))))))))))))))...))))))	GCGCAAAG-AAGCACAUUAGAGGC&ACUUUUGAUGUGCUUAACUUGUGC	0	0	NA	3	81.7974	0.497741	0	81.7974	yes
PC-3p-4450_1419	TRINITY_DN120077_c1_g1	708	736	727	-38	-27	0.710526	18	1-11,736-726;12-15,720-717;18-24,714-708	x-x,725-721[BULt];16-17,716-715[SIL]	(((((((..((((.....(((((((((((&)))))))))))-----))))..)))))))	GCACGAGGAGAGUUGCAAGCAUCGAGGGU&ACUUUUGAUGU-----GCUUAACUUGUGC	1	24.9165	0.339062	0	0	NA	24.9165	0	yes
PC-3p-4450_1419	TRINITY_DN121214_c1_g3	2673	2698	2689	-38	-25.7	0.676316	9.5	3-12,2696-2687;13-24,2684-2673	1-2,2698-2697[UP5];x-x,2686-2685[BULt]	((((((((((((..((((((((((..&..))))))))))--))))))))))))	GUGCAGGUUAAGAACACAUCAAAGAA&ACUUUUGAUGUG--CUUAACUUGUGC	0	0	NA	6	163.595	0.434806	0	163.595	yes
PC-3p-4450_1419	TRINITY_DN124606_c1_g1	5371	5394	5385	-38	-26.7	0.702632	5.5	1-15,5394-5380;18-23,5377-5372	16-17,5379-5378[SIL];24-24,5371-5371[UP3]	.((((((..(((((((((((((((&)))))))))))))))..)))))).	UCAUAAGACGGGCACGUCAAAAGU&ACUUUUGAUGUGCUUAACUUGUGC	1	24.9165	0.452461	0	0	NA	24.9165	0	yes
PC-3p-4450_1419	TRINITY_DN90771_c0_g1	1387	1417	1402	-38	-26.2	0.689474	16.5	1-7,1417-1411;8-11,1404-1401;12-24,1399-1387	x-x,1410-1405[BULt];x-x,1400-1400[BULt]	(((((((((((((.((((......(((((((&)))))))------))))-)))))))))))))	GUACGAGUUGAGCUACAUAGAAUCCAAAGGU&ACUUUUG------AUGU-GCUUAACUUGUGC	1	24.9165	0.529002	0	0	NA	24.9165	0	yes
PC-3p-445779_9	TRINITY_DN116875_c1_g5	72	95	86	-34.7	-22.8	0.657061	18.5	10-24,86-72	1-9,95-87[UP5]	(((((((((((((((.........&.........)))))))))))))))	GAUGCUCAUACUACAAAAGUAUGA&AUAAAUAAAUGUGGUGUGAGUAUC	0	0	NA	1	27.2658	0.860119	0	27.2658	yes
PC-3p-445779_9	TRINITY_DN93539_c6_g6	9	32	23	-34.7	-23.7	0.682997	16.5	8-21,25-12	1-7,32-26[UP5];22-24,11-9[UP3]	...((((((((((((((.......&.......))))))))))))))...	ACCGCUCACACCACAUUCAUACGU&AUAAAUAAAUGUGGUGUGAGUAUC	1	24.9165	0.721944	0	0	NA	24.9165	0	yes
PC-3p-445779_9	TRINITY_DN97624_c8_g1	1436	1459	1450	-34.7	-26	0.74928	11.5	5-12,1455-1448;14-24,1446-1436	1-4,1459-1456[UP5];13-13,1447-1447[SIL]	(((((((((((.((((((((....&....)))))))).)))))))))))	GGUACUCGCAUGGCGUUUAUGACG&AUAAAUAAAUGUGGUGUGAGUAUC	190	4734.14	0.115748	121	3299.16	0.125384	4734.14	3299.16	yes
PC-3p-58011_147	TRINITY_DN101445_c1_g1	877	897	888	-33.4	-24.6	0.736527	5	1-8,897-890;10-17,888-881;19-21,879-877	9-9,889-889[SIL];18-18,880-880[SIL]	(((.((((((((.((((((((&)))))))).)))))))).)))	GAUGAAAUCCAACGGCUUAGA&UUUGAGCCAUUGGAUUUGAUC	0	0	NA	1	27.2658	0.818953	0	27.2658	yes
PC-3p-58011_147	TRINITY_DN101502_c0_g1	742	764	755	-33.4	-24.6	0.736527	8.5	2-8,763-757;11-17,754-748;18-21,745-742	1-1,764-764[UP5];9-10,756-755[SIL];x-x,747-746[BULt]	((((..(((((((..(((((((.&.)))))))..)))))))--))))	GAUCUUGAAUCCAUGGGCUCAGU&UUUGAGCCAUUGGAUUU--GAUC	0	0	NA	1	27.2658	0.794028	0	27.2658	yes
PC-3p-58011_147	TRINITY_DN101829_c0_g1	334	353	344	-33.4	-22.5	0.673653	6	2-4,352-350;6-16,348-338;18-21,337-334	1-1,353-353[UP5];5-5,349-349[SIL];17-17,x-x[BULq]	((((-(((((((((((.(((.&.))).))))))))))).))))	GAUC-AAUCUAAUGGCGCGAU&UUUGAGCCAUUGGAUUUGAUC	1	24.9165	0.999717	2	54.5316	0.837483	24.9165	54.5316	yes
PC-3p-58011_147	TRINITY_DN102295_c0_g1	266	286	277	-33.4	-22	0.658683	8.5	2-12,285-275;14-14,273-273;17-21,270-266	1-1,286-286[UP5];13-13,274-274[SIL];15-16,272-271[SIL]	(((((..(.(((((((((((.&.))))))))))).)..)))))	GGUCAUUUGCGGUGGCUUGAU&UUUGAGCCAUUGGAUUUGAUC	4	99.6661	0.998268	0	0	NA	99.6661	0	yes
PC-3p-58011_147	TRINITY_DN103314_c0_g1	680	700	691	-33.4	-22.3	0.667665	12	4-11,697-690;13-21,688-680	1-3,700-698[UP5];12-12,689-689[SIL]	(((((((((.((((((((...&...)))))))).)))))))))	GGUCGGGUCGGAUGGUUUGUA&UUUGAGCCAUUGGAUUUGAUC	1	24.9165	0.999876	0	0	NA	24.9165	0	yes
PC-3p-58011_147	TRINITY_DN104718_c1_g1	1805	1825	1816	-33.4	-22.5	0.673653	10.5	4-14,1822-1812;17-20,1809-1806	1-3,1825-1823[UP5];15-16,1811-1810[SIL];21-21,1805-1805[UP3]	.((((..(((((((((((...&...)))))))))))..)))).	AGUCACUUCCAGUGGCUUUUG&UUUGAGCCAUUGGAUUUGAUC	1	24.9165	0.999683	0	0	NA	24.9165	0	yes
PC-3p-58011_147	TRINITY_DN105345_c1_g1	1239	1260	1250	-33.4	-22.5	0.673653	7.5	2-4,1259-1257;5-13,1255-1247;16-21,1244-1239	1-1,1260-1260[UP5];x-x,1256-1256[BULt];14-15,1246-1245[SIL]	((((((..(((((((((.(((.&.)))-)))))))))..))))))	GGUCAACACCGAUGGCUACAGU&UUUG-AGCCAUUGGAUUUGAUC	0	0	NA	1	27.2658	0.999056	0	27.2658	yes
PC-3p-58011_147	TRINITY_DN106194_c0_g1	35	54	46	-33.4	-21.9	0.655689	5.5	1-8,54-47;10-18,46-38;20-21,36-35	9-9,x-x[BULq];19-19,37-37[SIL]	((.(((((((((-((((((((&)))))))).))))))))).))	GAGCAAGUUCAA-GGCUCGAG&UUUGAGCCAUUGGAUUUGAUC	0	0	NA	3	81.7974	0.998654	0	81.7974	yes
PC-3p-58011_147	TRINITY_DN106197_c0_g1	83	102	92	-33.4	-22.5	0.673653	7	3-6,100-97;7-14,95-88;17-21,87-83	1-2,102-101[UP5];x-x,96-96[BULt];15-16,x-x[BULq]	(((((--((((((((.((((..&..))))-))))))))..)))))	GAUCA--UCCAAUGGACUCACU&UUUGAG-CCAUUGGAUUUGAUC	2	49.8331	0.115478	0	0	NA	49.8331	0	yes
PC-3p-58011_147	TRINITY_DN106424_c0_g1	622	643	634	-33.4	-22.3	0.667665	8	2-11,642-633;12-20,631-623	1-1,643-643[UP5];x-x,632-632[BULt];21-21,622-622[UP3]	.(((((((((.((((((((((.&.))))))))))-))))))))).	AAUUGGGUCCUGGUGGCUCAAC&UUUGAGCCAUU-GGAUUUGAUC	1	24.9165	0.999856	0	0	NA	24.9165	0	yes
PC-3p-58011_147	TRINITY_DN106894_c2_g1	341	363	354	-33.4	-22.1	0.661677	9	1-10,363-354;11-18,350-343;20-21,342-341	x-x,353-351[BULt];19-19,x-x[BULq]	((-((((((((...((((((((((&))))))))))---)))))))).))	GA-CAAGUUCAAGUGUGGCUCAAA&UUUGAGCCAU---UGGAUUUGAUC	1	24.9165	0.999973	2	54.5316	0.903297	24.9165	54.5316	yes
PC-3p-58011_147	TRINITY_DN107354_c0_g1	182	203	194	-33.4	-24.3	0.727545	6.5	1-14,203-190;15-20,188-183	x-x,189-189[BULt];21-21,182-182[UP3]	.((((((.((((((((((((((&))))))))))))))-)))))).	AAUUAAGUUCCGGUGGCUCGAG&UUUGAGCCAUUGGA-UUUGAUC	0	0	NA	1	27.2658	0.864557	0	27.2658	yes
PC-3p-58011_147	TRINITY_DN107878_c3_g3	504	529	515	-33.4	-22.78	0.682036	19	1-8,529-522;12-21,513-504	9-11,521-514[AILt]	((((((((((........((((((((&))))))))-----...))))))))))	GGUCAAGUCUUCGGUUCGGGCUCAGA&UUUGAGCC-----AUUGGAUUUGAUC	0	0	NA	2	54.5316	0.792817	0	54.5316	yes
PC-3p-58011_147	TRINITY_DN108473_c0_g2	1338	1359	1350	-33.4	-24.8	0.742515	7.5	4-19,1356-1341;20-21,1339-1338	1-3,1359-1357[UP5];x-x,1340-1340[BULt]	((.((((((((((((((((...&...))))))))))))))))-))	GAUUCAAAUUCAGUGGCUCCUU&UUUGAGCCAUUGGAUUUGA-UC	1	24.9165	0.76965	0	0	NA	24.9165	0	yes
PC-3p-58011_147	TRINITY_DN109060_c0_g1	1408	1428	1419	-33.4	-21.8	0.652695	6	1-13,1428-1416;15-17,1414-1412	14-14,1415-1415[SIL];18-21,1411-1408[UP3]	....(((.(((((((((((((&))))))))))))).)))....	CAAGAAAACCGAUGGCUCAAA&UUUGAGCCAUUGGAUUUGAUC	0	0	NA	1	27.2658	0.99999	0	27.2658	yes
PC-3p-58011_147	TRINITY_DN109235_c2_g1	2668	2692	2683	-33.4	-22.4	0.670659	11	4-11,2689-2682;13-14,2680-2679;15-21,2674-2668	1-3,2692-2690[UP5];12-12,2681-2681[SIL];x-x,2678-2675[BULt]	(((((((....((.((((((((...&...)))))))).))----)))))))	GAUCAAAUAGUUCGAAUGGCUCUAG&UUUGAGCCAUUGGA----UUUGAUC	3	74.7496	0.990508	0	0	NA	74.7496	0	yes
PC-3p-58011_147	TRINITY_DN110022_c2_g6	144	164	155	-33.4	-23.58	0.705988	8.5	2-8,163-157;12-20,153-145	1-1,164-164[UP5];9-11,156-154[SIL];21-21,144-144[UP3]	.(((((((((...(((((((.&.)))))))...))))))))).	CGUCAAAUCCCAGGGCUCAAC&UUUGAGCCAUUGGAUUUGAUC	0	0	NA	1	27.2658	0.967222	0	27.2658	yes
PC-3p-58011_147	TRINITY_DN110305_c2_g1	22	41	33	-33.4	-21.9	0.655689	7.5	3-5,39-37;7-8,36-35;10-21,33-22	1-2,41-40[UP5];6-6,x-x[BULq];9-9,34-34[SIL]	((((((((((((.((-(((..&..))).)).))))))))))))	GAUCAGAUCCAACGG-UCACG&UUUGAGCCAUUGGAUUUGAUC	1	24.9165	0.999997	1	27.2658	0.999983	24.9165	27.2658	yes
PC-3p-58011_147	TRINITY_DN110790_c0_g1	1051	1071	1062	-33.4	-24.2	0.724551	10	4-18,1068-1054	1-3,1071-1069[UP5];19-21,1053-1051[UP3]	...(((((((((((((((...&...)))))))))))))))...	CAGCAAAUCCAGUGGCUUUGC&UUUGAGCCAUUGGAUUUGAUC	2	49.8331	0.726365	0	0	NA	49.8331	0	yes
PC-3p-58011_147	TRINITY_DN111161_c0_g2	639	659	650	-33.4	-25.7	0.769461	7	2-11,658-649;13-21,647-639	1-1,659-659[UP5];12-12,648-648[SIL]	(((((((((.((((((((((.&.)))))))))).)))))))))	GAUUGGGUCGAGUGGCUCGAU&UUUGAGCCAUUGGAUUUGAUC	1	24.9165	0.546403	0	0	NA	24.9165	0	yes
PC-3p-58011_147	TRINITY_DN111598_c0_g1	1027	1048	1039	-33.4	-24.1	0.721557	8	1-15,1048-1034;17-18,1031-1030	16-16,1033-1032[AILt];19-21,1029-1027[UP3]	...((..(((((((((((((((&)))))))))))))))-.))...	AUCCAUCGUCCGAUGGCUCGAG&UUUGAGCCAUUGGAU-UUGAUC	1	24.9165	0.922685	0	0	NA	24.9165	0	yes
PC-3p-58011_147	TRINITY_DN111698_c0_g2	1457	1481	1471	-33.4	-22.2	0.664671	11.5	1-6,1481-1476;7-10,1474-1471;11-19,1467-1459	x-x,1475-1475[BULt];x-x,1470-1468[BULt];20-21,1458-1457[UP3]	..(((((((((...((((.((((((&))))))-))))---)))))))))..	UCUCAGAUCCACAUAUGGACUCAGA&UUUGAG-CCAU---UGGAUUUGAUC	0	0	NA	1	27.2658	0.999663	0	27.2658	yes
PC-3p-58011_147	TRINITY_DN111707_c1_g2	570	589	580	-33.4	-22.1	0.661677	4.5	1-12,589-578;14-20,577-571	13-13,x-x[BULq];21-21,570-570[UP3]	.(((((((-((((((((((((&)))))))))))).))))))).	UGUCAGAU-CAAUGGUUCAAG&UUUGAGCCAUUGGAUUUGAUC	0	0	NA	2	54.5316	0.996401	0	54.5316	yes
PC-3p-58011_147	TRINITY_DN112858_c0_g1	2525	2545	2536	-33.4	-22	0.658683	6.5	1-17,2545-2529;19-20,2527-2526	18-18,2528-2528[SIL];21-21,2525-2525[UP3]	.((.(((((((((((((((((&))))))))))))))))).)).	AAUGGGAUCUGAUGGUUCAAG&UUUGAGCCAUUGGAUUUGAUC	2	49.8331	0.997605	2	54.5316	0.91752	49.8331	54.5316	yes
PC-3p-58011_147	TRINITY_DN112955_c0_g1	1336	1361	1352	-33.4	-23	0.688623	10.5	3-16,1359-1346;17-21,1340-1336	1-2,1361-1360[UP5];x-x,1345-1341[BULt]	(((((.....((((((((((((((..&..))))))))))))))-----)))))	GAUUAUUUUCAAUCCAGUGGCUUAUU&UUUGAGCCAUUGGAUU-----UGAUC	2	49.8331	0.718767	0	0	NA	49.8331	0	yes
PC-3p-58011_147	TRINITY_DN115534_c1_g3	780	801	792	-33.4	-23	0.688623	10.5	3-11,799-791;12-13,789-788;16-21,785-780	1-2,801-800[UP5];x-x,790-790[BULt];14-15,787-786[SIL]	((((((..((.(((((((((..&..)))))))))-))..))))))	GGUCAAUGCCUGGUGGCUCGCU&UUUGAGCCAUU-GGAUUUGAUC	1	24.9165	0.998208	0	0	NA	24.9165	0	yes
PC-3p-58011_147	TRINITY_DN115560_c0_g2	2132	2151	2143	-33.4	-22.4	0.670659	7.5	1-5,2151-2147;7-11,2146-2142;13-21,2140-2132	6-6,x-x[BULq];12-12,2141-2141[SIL]	(((((((((.(((((-(((((&))))).))))).)))))))))	GGUCGGAUCGAGUGG-UCAGA&UUUGAGCCAUUGGAUUUGAUC	7	174.416	0.988611	7	190.861	0.987071	174.416	190.861	yes
PC-3p-58011_147	TRINITY_DN115831_c0_g2	1560	1583	1572	-33.4	-23.1	0.691617	8	1-9,1583-1575;10-16,1572-1566;17-20,1564-1561	x-x,1574-1573[BULt];x-x,1565-1565[BULt];21-21,1560-1560[UP3]	.((((.(((((((..(((((((((&)))))))))--)))))))-)))).	CGUCACAGUCCAGACUGGCUCAAA&UUUGAGCCA--UUGGAUU-UGAUC	1	24.9165	0.996195	0	0	NA	24.9165	0	yes
PC-3p-58011_147	TRINITY_DN117316_c1_g1	1776	1803	1794	-33.4	-22.1	0.661677	17	1-11,1803-1793;12-20,1785-1777	x-x,1792-1786[BULt];21-21,1776-1776[UP3]	.(((((((((.......(((((((((((&)))))))))))-------))))))))).	UAUCAAAUCCCUUCAUGGAUGGUUCAAA&UUUGAGCCAUU-------GGAUUUGAUC	1	24.9165	0.99998	1	27.2658	0.999904	24.9165	27.2658	yes
PC-3p-58011_147	TRINITY_DN117620_c3_g1	1840	1860	1851	-33.4	-24.2	0.724551	7.5	2-18,1859-1843	1-1,1860-1860[UP5];19-21,1842-1840[UP3]	...(((((((((((((((((.&.)))))))))))))))))...	UGGCAGAUCUAGUGGUUCAAG&UUUGAGCCAUUGGAUUUGAUC	0	0	NA	1	27.2658	0.868855	0	27.2658	yes
PC-3p-58011_147	TRINITY_DN117672_c0_g5	244	264	255	-33.4	-21.8	0.652695	8	3-11,262-254;12-18,252-246;20-21,245-244	1-2,264-263[UP5];x-x,253-253[BULt];19-19,x-x[BULq]	((-(((((((.(((((((((..&..)))))))))-))))))).))	GA-CGAGUCCUAAUGGUUCAUC&UUUGAGCCAUU-GGAUUUGAUC	1	24.9165	0.999999	0	0	NA	24.9165	0	yes
PC-3p-58011_147	TRINITY_DN118586_c1_g1	878	898	889	-33.4	-22	0.658683	5	2-7,897-892;9-20,890-879	1-1,898-898[UP5];8-8,891-891[SIL];21-21,878-878[UP3]	.((((((((((((.((((((.&.)))))).)))))))))))).	AAUCAAAUCCAAUUGUUCAAU&UUUGAGCCAUUGGAUUUGAUC	0	0	NA	1	27.2658	0.999948	0	27.2658	yes
PC-3p-58011_147	TRINITY_DN118954_c0_g1	419	441	432	-33.4	-25.4	0.760479	11.5	4-11,438-431;12-21,428-419	1-3,441-439[UP5];x-x,430-429[BULt]	((((((((((..((((((((...&...))))))))--))))))))))	GAUCAAGUCUUGGAUGGCUCUUA&UUUGAGCCAUU--GGAUUUGAUC	0	0	NA	1	27.2658	0.538783	0	27.2658	yes
PC-3p-58011_147	TRINITY_DN119132_c0_g3	305	325	316	-33.4	-24	0.718563	7	3-13,323-313;16-19,310-307	1-2,325-324[UP5];14-15,312-311[SIL];20-21,306-305[UP3]	..((((..(((((((((((..&..)))))))))))..))))..	GCUCAAGGCCAAUGGCUCACA&UUUGAGCCAUUGGAUUUGAUC	5	124.583	0.776524	3	81.7974	0.461848	124.583	81.7974	yes
PC-3p-58011_147	TRINITY_DN119922_c0_g1	744	764	754	-33.4	-22.8	0.682635	6	1-9,764-756;10-16,754-748;18-20,747-745	x-x,755-755[BULt];17-17,x-x[BULq];21-21,744-744[UP3]	.(((-(((((((.(((((((((&)))))))))-))))))).))).	CGUC-GAUCCGACUGGCUCAAA&UUUGAGCCA-UUGGAUUUGAUC	1	24.9165	0.998942	0	0	NA	24.9165	0	yes
PC-3p-58011_147	TRINITY_DN120070_c0_g1	1370	1392	1381	-33.4	-22.2	0.664671	9.5	1-8,1392-1385;10-20,1381-1371	9-9,1384-1382[AILt];21-21,1370-1370[UP3]	.(((((((((((...((((((((&))))))))--.))))))))))).	CGUCAAGUUCAACAAGGCUCAGA&UUUGAGCC--AUUGGAUUUGAUC	1	24.9165	0.999937	0	0	NA	24.9165	0	yes
PC-3p-58011_147	TRINITY_DN120339_c1_g1	773	791	782	-33.4	-23.2	0.694611	5	2-13,790-779;16-20,778-774	1-1,791-791[UP5];14-15,x-x[BULq];21-21,773-773[UP3]	.(((((--((((((((((((.&.))))))))))))..))))).	AAUCAA--CCAGUGGCUCAAC&UUUGAGCCAUUGGAUUUGAUC	1	24.9165	0.992508	0	0	NA	24.9165	0	yes
PC-3p-58011_147	TRINITY_DN120868_c2_g1	722	740	732	-33.4	-21.8	0.652695	9	2-9,739-732;12-21,731-722	1-1,740-740[UP5];10-11,x-x[BULq]	((((((((((--((((((((.&.))))))))..))))))))))	GGUCGAGUUC--UGGCUCGGC&UUUGAGCCAUUGGAUUUGAUC	1	24.9165	0.999999	0	0	NA	24.9165	0	yes
PC-3p-58011_147	TRINITY_DN120935_c0_g3	958	979	970	-33.4	-24.1	0.721557	5	1-16,979-964;17-18,962-961;21-21,958-958	x-x,963-963[BULt];19-20,960-959[SIL]	(..((.((((((((((((((((&))))))))))))))))-))..)	GUGCACAAUCUAAUGGCUCAGA&UUUGAGCCAUUGGAUU-UGAUC	2	49.8331	0.75767	0	0	NA	49.8331	0	yes
PC-3p-58011_147	TRINITY_DN121406_c0_g1	173	194	184	-33.4	-23.3	0.697605	8.5	1-9,194-186;11-20,183-174	10-10,185-184[AILt];21-21,173-173[UP3]	.((((((((((..(((((((((&)))))))))-.)))))))))).	CAUUAGGUCCACUUGGCUCGGA&UUUGAGCCA-UUGGAUUUGAUC	1	24.9165	0.989083	0	0	NA	24.9165	0	yes
PC-3p-58011_147	TRINITY_DN122639_c0_g2	3294	3314	3305	-33.4	-23.6	0.706587	8	1-8,3314-3307;11-21,3304-3294	9-10,3306-3305[SIL]	(((((((((((..((((((((&))))))))..)))))))))))	GAUCAAAUUCAUGGGCUUGGG&UUUGAGCCAUUGGAUUUGAUC	0	0	NA	4	109.063	0.865594	0	109.063	yes
PC-3p-58011_147	TRINITY_DN122933_c1_g3	452	472	463	-33.4	-22.1	0.661677	14.5	7-21,466-452	1-6,472-467[UP5]	(((((((((((((((......&......)))))))))))))))	GAUCGGGUCCGGUGGAUUUGG&UUUGAGCCAUUGGAUUUGAUC	1	24.9165	0.999975	0	0	NA	24.9165	0	yes
PC-3p-58011_147	TRINITY_DN123151_c1_g1	1392	1412	1403	-33.4	-22.7	0.679641	4	1-11,1412-1402;13-16,1400-1397;18-21,1395-1392	12-12,1401-1401[SIL];17-17,1396-1396[SIL]	((((.((((.(((((((((((&))))))))))).)))).))))	GAUUUGAUCAAAUGGCUCAAA&UUUGAGCCAUUGGAUUUGAUC	3	74.7496	0.980324	4	109.063	0.978007	74.7496	109.063	yes
PC-3p-58011_147	TRINITY_DN123151_c1_g1	1444	1464	1455	-33.4	-30.9	0.92515	4	3-21,1462-1444	1-2,1464-1463[UP5]	(((((((((((((((((((..&..)))))))))))))))))))	GAUCAAAUCUAAUGGCUCACA&UUUGAGCCAUUGGAUUUGAUC	1	24.9165	0.171572	0	0	NA	24.9165	0	yes
PC-3p-58011_147	TRINITY_DN123184_c1_g1	966	986	977	-33.4	-22.2	0.664671	8	1-14,986-973;16-18,971-969	15-15,972-972[SIL];19-21,968-966[UP3]	...(((.((((((((((((((&)))))))))))))).)))...	CAGCAGCUCUAGUGGCUCGAG&UUUGAGCCAUUGGAUUUGAUC	1	24.9165	0.999905	3	81.7974	0.87252	24.9165	81.7974	yes
PC-3p-58011_147	TRINITY_DN123745_c2_g1	1278	1298	1289	-33.4	-27.8	0.832335	5	2-21,1297-1278	1-1,1298-1298[UP5]	((((((((((((((((((((.&.))))))))))))))))))))	GGUUGAGUCUAAUGGCUCGAC&UUUGAGCCAUUGGAUUUGAUC	1	24.9165	0.260041	0	0	NA	24.9165	0	yes
PC-3p-58011_147	TRINITY_DN124189_c3_g1	2415	2435	2426	-33.4	-22.2	0.664671	10.5	4-10,2432-2426;12-17,2424-2419;20-21,2416-2415	1-3,2435-2433[UP5];11-11,2425-2425[SIL];18-19,2418-2417[SIL]	((..((((((.(((((((...&...))))))).))))))..))	GAGAAGAUCCCGUGGCUCUUC&UUUGAGCCAUUGGAUUUGAUC	0	0	NA	2	54.5316	0.892176	0	54.5316	yes
PC-3p-58011_147	TRINITY_DN124449_c1_g1	191	211	202	-33.4	-21.8	0.652695	6	1-20,211-192	21-21,191-191[UP3]	.((((((((((((((((((((&)))))))))))))))))))).	AGUUGGAUCUAAUGGUUUAAA&UUUGAGCCAUUGGAUUUGAUC	0	0	NA	2	54.5316	0.951331	0	54.5316	yes
PC-3p-58011_147	TRINITY_DN92975_c7_g6	642	663	653	-33.4	-25.2	0.754491	7	3-5,661-659;6-19,657-644	1-2,663-662[UP5];x-x,658-658[BULt];20-21,643-642[UP3]	..((((((((((((((.(((..&..)))-))))))))))))))..	ACUCAAAUCCAAUGGCAUCACU&UUUGA-GCCAUUGGAUUUGAUC	0	0	NA	1	27.2658	0.594594	0	27.2658	yes
PC-3p-58011_147	TRINITY_DN93324_c3_g1	91	111	102	-33.4	-24.5	0.733533	10	6-20,106-92	1-5,111-107[UP5];21-21,91-91[UP3]	.(((((((((((((((.....&.....))))))))))))))).	UAUCAAAUCCAAUGGCAGCAG&UUUGAGCCAUUGGAUUUGAUC	15	373.748	0.671663	5	136.329	0.369047	373.748	136.329	yes
PC-3p-58011_147	TRINITY_DN93392_c0_g1	918	941	929	-33.4	-22.04	0.65988	10	1-7,941-935;9-21,930-918	8-8,934-931[AILt]	(((((((((((((....(((((((&)))))))---.)))))))))))))	GAUCAGAUUCAGUUGUAGCUCAAA&UUUGAGC---CAUUGGAUUUGAUC	1	24.9165	0.999984	2	54.5316	0.996864	24.9165	54.5316	yes
PC-3p-58011_147	TRINITY_DN97485_c0_g1	1108	1127	1119	-33.4	-22.2	0.664671	5.5	1-5,1127-1123;7-18,1122-1111;21-21,1108-1108	6-6,x-x[BULq];19-20,1110-1109[SIL]	(..((((((((((((-(((((&))))).))))))))))))..)	GUGCAAAUCCAAUGG-UCAGG&UUUGAGCCAUUGGAUUUGAUC	1	24.9165	0.999935	5	136.329	0.993506	24.9165	136.329	yes
PC-3p-58011_147	TRINITY_DN98120_c0_g2	2214	2234	2225	-33.4	-22.3	0.667665	7	2-10,2233-2225;12-14,2223-2221;17-19,2218-2216	1-1,2234-2234[UP5];11-11,2224-2224[SIL];15-16,2220-2219[SIL];20-21,2215-2214[UP3]	..(((..(((.(((((((((.&.))))))))).)))..)))..	AUUCAUUUCCUAUGGCUCAAU&UUUGAGCCAUUGGAUUUGAUC	0	0	NA	2	54.5316	0.861386	0	54.5316	yes
PC-3p-58011_147	TRINITY_DN98708_c0_g2	169	190	180	-33.4	-22.1	0.661677	8.5	2-5,189-186;6-18,184-172	1-1,190-190[UP5];x-x,185-185[BULt];19-21,171-169[UP3]	...(((((((((((((.((((.&.))))-)))))))))))))...	UUACAGAUCUAAUGGCGUCGAU&UUUGA-GCCAUUGGAUUUGAUC	3	74.7496	0.996884	1	27.2658	0.999898	74.7496	27.2658	yes
PC-3p-58011_147	TRINITY_DN98951_c0_g1	706	726	717	-33.4	-24.9	0.745509	5	1-4,726-723;6-21,721-706	5-5,722-722[SIL]	((((((((((((((((.((((&)))).))))))))))))))))	GGUCGAGUUCAAUGGUGCAAA&UUUGAGCCAUUGGAUUUGAUC	1	24.9165	0.751638	2	54.5316	0.266411	24.9165	54.5316	yes
PC-3p-58374_146	TRINITY_DN117672_c0_g5	14	40	31	-42.3	-27.84	0.658156	8.5	1-10,40-31;11-16,29-24;21-24,17-14	x-x,30-30[BULt];17-20,23-18[AILt]	((((......((((((.((((((((((&))))))))))-))))))--....))))	GGUUCGACCAUUGAGAGCUUGUCGGCU&AGCCGACAAG-UCUCAA--AAUAAGCC	0	0	NA	1	27.2658	0.553418	0	27.2658	yes
PC-3p-613_8603	TRINITY_DN107708_c1_g1	498	518	509	-31.7	-23.3	0.735016	9	4-20,515-499	1-3,518-516[UP5];21-21,498-498[UP3]	.(((((((((((((((((...&...))))))))))))))))).	GUCAGUUGUCUACUGCUUUAA&UUUAAGUAGUGGACAAUUGGA	0	0	NA	1	27.2658	0.363285	0	27.2658	yes
PC-3p-613_8603	TRINITY_DN112423_c1_g1	104	125	116	-31.7	-21.9	0.690852	14.5	6-11,120-115;12-20,113-105	1-5,125-121[UP5];x-x,114-114[BULt];21-21,104-104[UP3]	.(((((((((.((((((.....&.....))))))-))))))))).	GCCGAUUGUCUCGCUGCCGUUA&UUUAAGUAGUG-GACAAUUGGA	2	49.8331	0.292469	0	0	NA	49.8331	0	yes
PC-3p-613_8603	TRINITY_DN113461_c2_g2	690	710	701	-31.7	-30	0.946372	2.5	2-21,709-690	1-1,710-710[UP5]	((((((((((((((((((((.&.))))))))))))))))))))	UCCAGUUGUCCAUUACUUAAG&UUUAAGUAGUGGACAAUUGGA	3	74.7496	0.0200457	26	708.91	0.000601075	74.7496	708.91	yes
PC-3p-613_8603	TRINITY_DN117411_c0_g1	1837	1857	1848	-31.7	-21.3	0.671924	6.5	1-8,1857-1850;10-17,1848-1841;19-19,1839-1839	9-9,1849-1849[SIL];18-18,1840-1840[SIL];20-21,1838-1837[UP3]	..(.((((((((.((((((((&)))))))).)))))))).)..	GGCUGUUGUCCAGUACUUGAA&UUUAAGUAGUGGACAAUUGGA	1	24.9165	0.913441	0	0	NA	24.9165	0	yes
PC-3p-613_8603	TRINITY_DN118226_c0_g1	850	870	861	-31.7	-20.8	0.656151	11	4-7,867-864;9-21,862-850	1-3,870-868[UP5];8-8,863-863[SIL]	(((((((((((((.((((...&...)))).)))))))))))))	UCCGGUUGUCUAUGGCUUCUC&UUUAAGUAGUGGACAAUUGGA	3	74.7496	0.894356	0	0	NA	74.7496	0	yes
PC-3p-613_8603	TRINITY_DN120204_c4_g2	63	82	73	-31.7	-23.5	0.741325	4	1-12,82-71;14-20,70-64	13-13,x-x[BULq];21-21,63-63[UP3]	.(((((((-((((((((((((&)))))))))))).))))))).	ACCGAUUG-CUACUACUUAAG&UUUAAGUAGUGGACAAUUGGA	0	0	NA	1	27.2658	0.27563	0	27.2658	yes
PC-3p-613_8603	TRINITY_DN121341_c0_g1	955	975	966	-31.7	-23.1	0.728707	12	6-7,970-969;9-21,967-955	1-5,975-971[UP5];8-8,968-968[SIL]	(((((((((((((.((.....&.....)).)))))))))))))	UCCAAUUGUCCGCAACGCCGG&UUUAAGUAGUGGACAAUUGGA	1	24.9165	0.510933	0	0	NA	24.9165	0	yes
PC-3p-613_8603	TRINITY_DN123821_c2_g5	148	172	163	-31.7	-20.9	0.659306	11.5	4-16,169-157;17-21,152-148	1-3,172-170[UP5];x-x,156-153[BULt]	(((((....(((((((((((((...&...)))))))))))))----)))))	UCCGAAGUCUUGUCCGCUAUUUUUG&UUUAAGUAGUGGACAA----UUGGA	1	24.9165	0.973054	0	0	NA	24.9165	0	yes
PC-3p-79800_105	TRINITY_DN101540_c0_g3	377	398	389	-30.4	-23.8	0.782895	3	1-5,398-394;7-13,392-386;15-22,384-377	6-6,393-393[SIL];14-14,385-385[SIL]	((((((((.(((((((.(((((&))))).))))))).))))))))	UGGUUUCCUUGUAAAUUUUUCA&UGAAAUAUUUACAUGGAAACCA	1	24.9165	0.106791	0	0	NA	24.9165	0	yes
PC-3p-79800_105	TRINITY_DN112699_c3_g1	755	778	767	-30.4	-20.4	0.671053	9	2-5,777-774;7-9,771-769;10-21,767-756	1-1,778-778[UP5];6-6,773-772[AILt];x-x,768-768[BULt];22-22,755-755[UP3]	.((((((((((((.(((..((((.&.))))-.)))-)))))))))))).	CGGUUUCCAUGUGUAAUCCUUUCG&UGAAA-UAUU-UACAUGGAAACCA	0	0	NA	2	54.5316	0.423576	0	54.5316	yes
PC-3p-79800_105	TRINITY_DN112881_c1_g1	630	652	643	-30.4	-21	0.690789	9.5	1-4,652-649;7-11,646-642;12-21,640-631	5-6,648-647[SIL];x-x,641-641[BULt];22-22,630-630[UP3]	.((((((((((.(((((..((((&))))..)))))-)))))))))).	CGGUUUCCAUGUUGGAUUCUUCG&UGAAAUAUUUA-CAUGGAAACCA	1	24.9165	0.492171	0	0	NA	24.9165	0	yes
PC-3p-79800_105	TRINITY_DN114351_c0_g2	695	715	707	-30.4	-19.8	0.651316	9	2-3,714-713;6-21,711-696	1-1,715-715[UP5];4-5,712-712[AILq];22-22,695-695[UP3]	.((((((((((((((((.-((.&.))..)))))))))))))))).	AGGUUUUCGUGUGAAUGA-UCU&UGAAAUAUUUACAUGGAAACCA	0	0	NA	1	27.2658	0.765673	0	27.2658	yes
PC-3p-79800_105	TRINITY_DN122314_c4_g2	544	565	556	-30.4	-23.4	0.769737	3	1-5,565-561;7-13,559-553;15-22,551-544	6-6,560-560[SIL];14-14,552-552[SIL]	((((((((.(((((((.(((((&))))).))))))).))))))))	UGGUUUCCCUGUAAAUUUUUCA&UGAAAUAUUUACAUGGAAACCA	9	224.249	0.00230172	0	0	NA	224.249	0	yes
PC-3p-79800_105	TRINITY_DN123881_c0_g2	172	193	184	-30.4	-19.9	0.654605	11.5	5-16,189-178;18-21,176-173	1-4,193-190[UP5];17-17,177-177[SIL];22-22,172-172[UP3]	.((((.((((((((((((....&....)))))))))))).)))).	AGGUUACCGUGUGAAUGUCUGC&UGAAAUAUUUACAUGGAAACCA	1	24.9165	0.809172	0	0	NA	24.9165	0	yes
PC-3p-79800_105	TRINITY_DN95397_c0_g1	338	359	350	-30.4	-27.3	0.898026	2.5	1-4,359-356;6-22,354-338	5-5,355-355[SIL]	(((((((((((((((((.((((&)))).)))))))))))))))))	UGGUUUCCGUGUAAAUACUUCA&UGAAAUAUUUACAUGGAAACCA	11	274.082	0.00115152	4	109.063	0.00147352	274.082	109.063	yes
PC-3p-849259_5	TRINITY_DN109436_c0_g1	984	1006	997	-38.3	-25.7	0.671018	6	2-12,1005-995;15-19,994-990;20-24,988-984	1-1,1006-1006[UP5];13-14,x-x[BULq];x-x,989-989[BULt]	(((((.(((((--(((((((((((.&.)))))))))))..)))))-)))))	AGGAGCUUCGU--GAGAGAGUUGUA&CAUAACUUUCUCAUACGAA-CUCCU	23	573.08	0.372327	11	299.924	0.363986	573.08	299.924	yes
PC-3p-849259_5	TRINITY_DN119075_c4_g2	835	858	849	-38.3	-25.3	0.660574	13	6-17,853-842;19-23,840-836	1-5,858-854[UP5];18-18,841-841[SIL];24-24,835-835[UP3]	.(((((.((((((((((((.....&.....)))))))))))).))))).	UGGAGUAUGUGUGAGAGAGAUCUU&CAUAACUUUCUCAUACGAACUCCU	2	49.8331	0.205982	1	27.2658	0.619914	49.8331	27.2658	yes
PC-3p-849259_5	TRINITY_DN119201_c0_g3	1858	1886	1877	-38.3	-25.6	0.668407	12.5	1-12,1886-1875;13-16,1870-1867;18-21,1865-1862;22-24,1860-1858	x-x,1874-1871[BULt];17-17,1866-1866[SIL];x-x,1861-1861[BULt]	(((.((((.((((....((((((((((((&))))))))))))----)))).))))-)))	GGGCAGUUGGUAUAGUCGAGAAGGUUGUG&CAUAACUUUCUC----AUACGAACU-CCU	1	24.9165	0.594843	0	0	NA	24.9165	0	yes
PC-3p-849259_5	TRINITY_DN121363_c1_g2	1350	1373	1364	-38.3	-27.6	0.720627	13	6-24,1368-1350	1-5,1373-1369[UP5]	(((((((((((((((((((.....&.....)))))))))))))))))))	AGGGGUUUGUAUGGGGGAGCUACG&CAUAACUUUCUCAUACGAACUCCU	1	24.9165	0.231654	0	0	NA	24.9165	0	yes
PC-3p-89875_92	TRINITY_DN110448_c1_g1	11	34	25	-36.7	-27.4	0.746594	4.5	2-19,33-16;22-24,13-11	1-1,34-34[UP5];20-21,15-14[SIL]	(((..((((((((((((((((((.&.))))))))))))))))))..)))	GAUCCAUACUCACACCACAUUUUC&AAAAGUGUGGUGUGAGUAUCAAUU	1	24.9165	0.47269	0	0	NA	24.9165	0	yes
PC-3p-89875_92	TRINITY_DN114941_c2_g3	201	223	214	-36.7	-24.3	0.662125	13.5	5-10,219-214;12-21,213-204	1-4,223-220[UP5];11-11,x-x[BULq];22-24,203-201[UP3]	...((((((((((-((((((....&....)))))).))))))))))...	GAAUGAUACUCGC-CUACACACUA&AAAAGUGUGGUGUGAGUAUCAAUU	4	99.6661	0.0488848	1	27.2658	0.939514	99.6661	27.2658	yes
PC-3p-89875_92	TRINITY_DN118357_c0_g1	599	628	614	-36.7	-24.2	0.659401	16	3-8,626-621;9-15,615-609;16-24,607-599	1-2,628-627[UP5];x-x,620-616[BULt];x-x,608-608[BULt]	(((((((((.(((((((.....((((((..&..))))))-----)))))))-)))))))))	AAUUGAUGCGUCGCACUAGAAGACACUUGU&AAAAGUGU-----GGUGUGA-GUAUCAAUU	1	24.9165	0.968675	0	0	NA	24.9165	0	yes
PC-3p-89875_92	TRINITY_DN123340_c0_g1	115	138	129	-36.7	-26.1	0.711172	10.5	4-15,135-124;17-21,122-118	1-3,138-136[UP5];16-16,123-123[SIL];22-24,117-115[UP3]	...(((((.((((((((((((...&...)))))))))))).)))))...	UGCUGGUGGUUACACCACACUCGC&AAAAGUGUGGUGUGAGUAUCAAUU	1	24.9165	0.651481	0	0	NA	24.9165	0	yes
PC-3p-89875_92	TRINITY_DN124953_c3_g1	104	129	120	-36.7	-25.8	0.702997	12	5-9,125-121;11-17,119-113;18-24,110-104	1-4,129-126[UP5];10-10,120-120[SIL];x-x,112-111[BULt]	(((((((..(((((((.(((((....&....))))).)))))))--)))))))	GAUUGAUUUGCUCACAGCACACGCGU&AAAAGUGUGGUGUGAGU--AUCAAUU	2	49.8331	0.224086	2	54.5316	0.241425	49.8331	54.5316	yes
PC-3p-89875_92	TRINITY_DN95226_c3_g1	129	152	143	-36.7	-24.4	0.66485	10.5	4-11,149-142;12-16,140-136;18-22,135-131	1-3,152-150[UP5];x-x,141-141[BULt];17-17,x-x[BULq];23-24,130-129[UP3]	..(((((-(((((.((((((((...&...))))))))-))))).)))))..	GCUUGAU-CUCGCAACCACACUCCU&AAAAGUGUGGU-GUGAGUAUCAAUU	4	99.6661	0.459394	7	190.861	0.488216	99.6661	190.861	yes
PC-3p-89875_92	TRINITY_DN98618_c3_g1	440	466	457	-36.7	-24.8	0.675749	15.5	4-12,463-455;13-21,451-443	1-3,466-464[UP5];x-x,454-452[BULt];22-24,442-440[UP3]	...(((((((((...(((((((((...&...)))))))))---)))))))))...	GGGUGAUGCUCAGUUCACCACAUUGGG&AAAAGUGUGGUG---UGAGUAUCAAUU	1	24.9165	0.916639	3	81.7974	0.72708	24.9165	81.7974	yes
PC-3p-97651_83	TRINITY_DN107568_c0_g1	1025	1052	1043	-44.1	-29.5	0.668934	11	3-10,1050-1043;11-18,1040-1033;19-22,1031-1028;23-24,1026-1025	1-2,1052-1051[UP5];x-x,1042-1041[BULt];x-x,1032-1032[BULt];x-x,1027-1027[BULt]	((.((((.((((((((..((((((((..&..))))))))--))))))))-))))-))	UCACUGCAAGAAGAGGAAGCACAGGGUU&AUCCCUGUGU--CCUUUUCU-GUAG-GA	0	0	NA	1	27.2658	0.553418	0	27.2658	yes
PC-3p-97651_83	TRINITY_DN108017_c2_g2	2254	2281	2272	-44.1	-29.3	0.664399	11	1-8,2281-2274;11-20,2271-2262;21-23,2257-2255	9-10,2273-2272[SIL];x-x,2261-2258[BULt];24-24,2254-2254[UP3]	.(((....((((((((((..((((((((&))))))))..))))))))))----))).	GCCUGAAAGCAGAAGAGGUGAUAGGGAU&AUCCCUGUGUCCUUUUCUGU----AGGA	1	24.9165	0.63811	0	0	NA	24.9165	0	yes
PC-3p-97651_83	TRINITY_DN117798_c1_g2	832	859	846	-44.1	-30.24	0.685714	17.5	2-6,858-854;10-23,846-833	1-1,859-859[UP5];7-9,853-847[AILt];24-24,832-832[UP3]	.((((((((((((((.......(((((.&.)))))----...)))))))))))))).	CCCUGCGGAAGAGGAGAAGAAGAGGGAA&AUCCCU----GUGUCCUUUUCUGUAGGA	1	24.9165	0.363481	0	0	NA	24.9165	0	yes
PC-3p-97651_83	TRINITY_DN120405_c1_g2	133	161	147	-44.1	-29.1	0.659864	14.5	1-6,161-156;7-16,150-141;19-23,138-134	x-x,155-151[BULt];17-18,140-139[SIL];24-24,133-133[UP3]	.(((((..((((((((((.....((((((&))))))-----))))))))))..))))).	GCCUGCCAGAAGGGACACUUUAAAGGGAU&AUCCCU-----GUGUCCUUUUCUGUAGGA	1	24.9165	0.688699	0	0	NA	24.9165	0	yes
PC-3p-97651_83	TRINITY_DN124601_c2_g1	499	525	515	-44.1	-28.9	0.655329	9	2-3,524-523;4-8,521-517;10-20,515-505;21-24,502-499	1-1,525-525[UP5];x-x,522-522[BULt];9-9,516-516[SIL];x-x,504-503[BULt]	((((..(((((((((((.(((((.((.&.))-))))).)))))))))))--))))	UCCUGUAUAGAAAGGGAGACGGGAGAC&AUC-CCUGUGUCCUUUUCUGU--AGGA	0	0	NA	2	54.5316	0.507526	0	54.5316	yes
PC-3p-97651_83	TRINITY_DN93596_c0_g4	334	359	349	-44.1	-29.6	0.671202	10	1-4,359-356;5-13,354-346;16-22,342-336	x-x,355-355[BULt];14-15,345-343[AILt];23-24,335-334[UP3]	..(((((((...(((((((((.((((&))))-)))))))))-..)))))))..	AGCUGCAGAUCUGGGACACGGCGGGU&AUCC-CUGUGUCCU-UUUCUGUAGGA	2	49.8331	0.346385	0	0	NA	49.8331	0	yes
PC-3p-97651_83	TRINITY_DN95039_c0_g2	345	368	359	-44.1	-31.1	0.705215	7	2-3,367-366;5-23,364-346	1-1,368-368[UP5];4-4,365-365[SIL];24-24,345-345[UP3]	.(((((((((((((((((((.((.&.)).))))))))))))))))))).	GCUUGCAGAAAAGGGCAUAGAGAA&AUCCCUGUGUCCUUUUCUGUAGGA	1	24.9165	0.313707	0	0	NA	24.9165	0	yes
PC-3p-97651_83	TRINITY_DN98605_c1_g1	506	528	520	-44.1	-29.7	0.673469	8.5	2-7,527-522;9-20,521-510;23-23,507-507	1-1,528-528[UP5];8-8,x-x[BULq];21-22,509-508[SIL];24-24,506-506[UP3]	.(..((((((((((((-((((((.&.)))))).))))))))))))..).	GCAAGCGGAAAGGGGC-CAGGGAA&AUCCCUGUGUCCUUUUCUGUAGGA	3	74.7496	0.319371	2	54.5316	0.311908	74.7496	54.5316	yes
PC-3p-97651_83	TRINITY_DN99688_c0_g1	380	401	392	-44.1	-28.7	0.650794	8	2-11,400-391;12-14,389-387;18-23,386-381	1-1,401-401[UP5];x-x,390-390[BULt];15-17,x-x[BULq];24-24,380-380[UP3]	.((((((---(((.((((((((((.&.))))))))))-)))...)))))).	CCCUACA---AAGUGACGCAGGGAA&AUCCCUGUGUC-CUUUUCUGUAGGA	1	24.9165	0.801851	0	0	NA	24.9165	0	yes
PC-5p-1029_5226	TRINITY_DN101767_c1_g1	722	742	733	-34.8	-23.1	0.663793	6.5	3-13,740-730;15-18,728-725;20-22,724-722	1-2,742-741[UP5];14-14,729-729[SIL];19-19,x-x[BULq]	(((-((((.(((((((((((..&..))))))))))).)))).)))	AGC-UGCACUAUUCCCUUCACA&UUUGAAGGGAGUAUUGCAUGUU	4	99.6661	0.831689	4	109.063	0.82297	99.6661	109.063	yes
PC-5p-1029_5226	TRINITY_DN102818_c0_g1	2389	2412	2401	-34.8	-22.8	0.655172	13	4-9,2409-2404;11-22,2400-2389	1-3,2412-2410[UP5];10-10,2403-2401[AILt]	((((((((((((...((((((...&...))))))--.))))))))))))	GGCAUGUAGUACCAACCCUUCCUC&UUUGAAGGG--AGUAUUGCAUGUU	4	99.6661	0.883099	6	163.595	0.875767	99.6661	163.595	yes
PC-5p-1029_5226	TRINITY_DN103178_c0_g1	40	61	52	-34.8	-23.4	0.672414	9.5	1-3,61-59;6-22,56-40	4-5,58-57[SIL]	(((((((((((((((((..(((&)))..)))))))))))))))))	AGCGUGCAGUGCUUCUUGGAGA&UUUGAAGGGAGUAUUGCAUGUU	0	0	NA	1	27.2658	0.880947	0	27.2658	yes
PC-5p-1029_5226	TRINITY_DN104156_c0_g2	724	746	737	-34.8	-24.2	0.695402	6.5	2-8,745-739;10-18,737-729;19-22,727-724	1-1,746-746[UP5];9-9,738-738[SIL];x-x,728-728[BULt]	((((.(((((((((.(((((((.&.))))))).)))))))))-))))	GGCACUGCAGUGCUACCUUCAAC&UUUGAAGGGAGUAUUGCA-UGUU	2	49.8331	0.466198	0	0	NA	49.8331	0	yes
PC-5p-1029_5226	TRINITY_DN111544_c1_g1	882	908	894	-34.8	-22.9	0.658046	15	3-6,906-903;7-9,901-899;10-22,894-882	1-2,908-907[UP5];x-x,902-902[BULt];x-x,898-895[BULt]	(((((((((((((....(((.((((..&..))))-)))----)))))))))))))	GGCAUGCGGUACUGGCACCCAUUCACC&UUUGAA-GGG----AGUAUUGCAUGUU	1	24.9165	0.975008	0	0	NA	24.9165	0	yes
PC-5p-1029_5226	TRINITY_DN112398_c0_g1	356	379	370	-34.8	-24.9	0.715517	8.5	2-11,378-369;13-22,365-356	1-1,379-379[UP5];12-12,368-366[AILt]	((((((((((...((((((((((.&.))))))))))--.))))))))))	AGCAUGCAAUUCCCUUCCUUCAAC&UUUGAAGGGAG--UAUUGCAUGUU	1	24.9165	0.452461	0	0	NA	24.9165	0	yes
PC-5p-1029_5226	TRINITY_DN114278_c0_g1	1922	1955	1946	-34.8	-23.2	0.666667	29	3-12,1953-1944;13-22,1931-1922	1-2,1955-1954[UP5];x-x,1943-1932[BULt]	((((((((((............((((((((((..&..))))))))))------------))))))))))	GACAUGCAGUUCAAAAUGAGCGACUCCCUUUACG&UUUGAAGGGAGU------------AUUGCAUGUU	0	0	NA	2	54.5316	0.808474	0	54.5316	yes
PC-5p-1029_5226	TRINITY_DN115864_c0_g1	212	232	223	-34.8	-24.7	0.70977	5	1-15,232-218;17-19,217-215	16-16,x-x[BULq];20-22,214-212[UP3]	...(((-(((((((((((((((&))))))))))))))).)))...	AUGAUG-AAUACUCCCUUCAGA&UUUGAAGGGAGUAUUGCAUGUU	1	24.9165	0.529002	0	0	NA	24.9165	0	yes
PC-5p-1029_5226	TRINITY_DN116634_c0_g2	77	102	89	-34.8	-23	0.66092	15	3-7,100-96;8-10,91-89;12-21,87-78	1-2,102-101[UP5];x-x,95-92[BULt];11-11,88-88[SIL];22-22,77-77[UP3]	.((((((((((.(((....(((((..&..)))))----))).)))))))))).	UGCAUGCAGUAGUCCAACACUUCACA&UUUGAAG----GGAGUAUUGCAUGUU	1	24.9165	0.969832	2	54.5316	0.540999	24.9165	54.5316	yes
PC-5p-1029_5226	TRINITY_DN120237_c3_g2	5834	5855	5846	-34.8	-23.6	0.678161	14	7-20,5849-5836	1-6,5855-5850[UP5];21-22,5835-5834[UP3]	..((((((((((((((......&......))))))))))))))..	GCCAUGCAAUACUCCUAUAGAA&UUUGAAGGGAGUAUUGCAUGUU	0	0	NA	1	27.2658	0.800564	0	27.2658	yes
PC-5p-1029_5226	TRINITY_DN122339_c0_g2	880	903	894	-34.8	-25.28	0.726437	12.5	4-12,900-892;15-22,887-880	1-3,903-901[UP5];13-14,891-888[AILt]	((((((((....(((((((((...&...)))))))))--..))))))))	AACGUGCAUUGAGCUCCCUUCCAC&UUUGAAGGGAGU--AUUGCAUGUU	1	24.9165	0.287379	3	81.7974	0.162286	24.9165	81.7974	yes
PC-5p-1029_5226	TRINITY_DN125007_c5_g1	1217	1239	1229	-34.8	-26.6	0.764368	9.5	4-8,1236-1232;9-22,1230-1217	1-3,1239-1237[UP5];x-x,1231-1231[BULt]	((((((((((((((.(((((...&...)))))-))))))))))))))	GACAUGCAAUGCUCUUCUUCUUA&UUUGAAGG-GAGUAUUGCAUGUU	6	149.499	0.0523956	3	81.7974	0.0569275	149.499	81.7974	yes
PC-5p-1029_5226	TRINITY_DN125072_c5_g1	5395	5417	5408	-34.8	-23.3	0.66954	9	1-4,5417-5414;7-11,5411-5407;13-22,5404-5395	5-6,5413-5412[SIL];12-12,5406-5405[AILt]	((((((((((..(((((..((((&))))..)))))-.))))))))))	AGCAUGCGAUUUCUCCCCCCAAA&UUUGAAGGGAG-UAUUGCAUGUU	1	24.9165	0.93595	1	27.2658	0.905002	24.9165	27.2658	yes
PC-5p-1029_5226	TRINITY_DN125125_c2_g1	117	141	132	-34.8	-23.3	0.66954	11	4-8,138-134;10-14,132-128;15-22,124-117	1-3,141-139[UP5];9-9,133-133[SIL];x-x,127-125[BULt]	((((((((...(((((.(((((...&...))))).)))))---))))))))	GACAUGCGGACAUACUGCCUUCUUC&UUUGAAGGGAGUAU---UGCAUGUU	0	0	NA	1	27.2658	0.884725	0	27.2658	yes
PC-5p-1029_5226	TRINITY_DN88339_c0_g1	612	634	626	-34.8	-22.9	0.658046	6	1-8,634-627;10-18,626-618;19-21,615-613	9-9,x-x[BULq];x-x,617-616[BULt];22-22,612-612[UP3]	.(((..(((((((((-((((((((&)))))))).)))))))))--))).	UGCAUCUGCAAUACU-CCUUCAAG&UUUGAAGGGAGUAUUGCA--UGUU	2	49.8331	0.536445	0	0	NA	49.8331	0	yes
PC-5p-1029_5226	TRINITY_DN97079_c2_g1	960	981	972	-34.8	-24.4	0.701149	6.5	2-8,980-974;10-11,972-971;14-22,968-960	1-1,981-981[UP5];9-9,973-973[SIL];12-13,970-969[SIL]	(((((((((..((.(((((((.&.))))))).))..)))))))))	AGCAUGCAAACCUGCCUUCAAC&UUUGAAGGGAGUAUUGCAUGUU	3	74.7496	0.409321	3	81.7974	0.195635	74.7496	81.7974	yes
PC-5p-1029_5226	TRINITY_DN97624_c8_g2	91	111	103	-34.8	-23.1	0.663793	11	4-9,108-103;11-22,102-91	1-3,111-109[UP5];10-10,x-x[BULq]	((((((((((((-((((((...&...)))))).))))))))))))	GGCAUGCAAUGC-CCUUUUUGA&UUUGAAGGGAGUAUUGCAUGUU	631	15722.3	0.479781	621	16932.1	0.5092	15722.3	16932.1	yes
PC-5p-115928_68	TRINITY_DN109262_c0_g1	588	616	602	-34.3	-23.2	0.676385	18.5	3-8,614-609;9-21,603-591	1-2,616-615[UP5];x-x,608-604[BULt];22-24,590-588[UP3]	...(((((((((((((.....((((((..&..))))))-----)))))))))))))...	UAUAUGGAGUGUGCCAGAAGCGUUAAUAA&AAAUUGAU-----UGGCACACUCUAUUUU	2	49.8331	0.621663	0	0	NA	49.8331	0	yes
PC-5p-115928_68	TRINITY_DN112664_c0_g2	433	457	448	-34.3	-22.8	0.664723	12	3-4,455-454;6-11,452-447;12-24,445-433	1-2,457-456[UP5];5-5,453-453[SIL];x-x,446-446[BULt]	(((((((((((((.((((((.((..&..)).))))))-)))))))))))))	AAAAUGGGGUGUGUCCGGUUUGUGC&AAAUUGAUUGG-CACACUCUAUUUU	1	24.9165	0.91012	0	0	NA	24.9165	0	yes
PC-5p-115928_68	TRINITY_DN121847_c0_g1	471	494	485	-34.3	-23.8	0.693878	14	4-19,491-476	1-3,494-492[UP5];20-24,475-471[UP3]	.....((((((((((((((((...&...)))))))))))))))).....	UCAGAGGGGUGUGCCGAUUGAGAC&AAAUUGAUUGGCACACUCUAUUUU	2	49.8331	0.517598	0	0	NA	49.8331	0	yes
PC-5p-115928_68	TRINITY_DN122456_c3_g1	702	725	716	-34.3	-23.6	0.688047	14.5	8-24,718-702	1-7,725-719[UP5]	(((((((((((((((((.......&.......)))))))))))))))))	AAAAUGGAGUGUGCUAAGGUUUGU&AAAUUGAUUGGCACACUCUAUUUU	0	0	NA	1	27.2658	0.715654	0	27.2658	yes
PC-5p-115928_68	TRINITY_DN122779_c0_g1	638	664	653	-34.3	-25	0.728863	9	3-8,662-657;9-14,654-649;15-24,647-638	1-2,664-663[UP5];x-x,656-655[BULt];x-x,648-648[BULt]	((((((((((.((((((..((((((..&..))))))--))))))-))))))))))	AAGAUAGGGUGGUGCCACCAUCAAUGA&AAAUUGAU--UGGCAC-ACUCUAUUUU	0	0	NA	4	109.063	0.27007	0	109.063	yes
PC-5p-146541_50	TRINITY_DN100296_c0_g1	1301	1321	1312	-29.2	-19.5	0.667808	10.5	1-5,1321-1317;8-16,1314-1306	6-7,1316-1315[SIL];17-21,1305-1301[UP3]	.....(((((((((..(((((&)))))..))))))))).....	AAAGCCUUACAUGGUUGCCAG&UUGGUUUCCAUGUAAGUAUUU	1	24.9165	1	0	0	NA	24.9165	0	yes
PC-5p-146541_50	TRINITY_DN102140_c4_g2	62	82	73	-29.2	-20.2	0.691781	8.5	5-21,78-62	1-4,82-79[UP5]	(((((((((((((((((....&....)))))))))))))))))	GAAUAUUUGCAUGGAAAGAAU&UUGGUUUCCAUGUAAGUAUUU	1	24.9165	0.999727	0	0	NA	24.9165	0	yes
PC-5p-146541_50	TRINITY_DN102212_c0_g1	344	365	355	-29.2	-19.5	0.667808	11.5	1-9,365-357;12-20,353-345	10-11,356-354[AILt];21-21,344-344[UP3]	.(((((((((...(((((((((&)))))))))-..))))))))).	CGGUACUUAUUGAGGAGGCCAG&UUGGUUUCC-AUGUAAGUAUUU	6	149.499	0.999621	0	0	NA	149.499	0	yes
PC-5p-146541_50	TRINITY_DN102673_c0_g3	780	804	793	-29.2	-19.3	0.660959	8	1-8,804-797;9-13,794-790;14-21,787-780	x-x,796-795[BULt];x-x,789-788[BULt]	((((((((..(((((..((((((((&))))))))--)))))--))))))))	GAAUGCUUGAACAUGCUGAAACCGA&UUGGUUUC--CAUGU--AAGUAUUU	4	99.6661	0.999939	1	27.2658	1	99.6661	27.2658	yes
PC-5p-146541_50	TRINITY_DN103327_c1_g1	434	455	445	-29.2	-20.6	0.705479	10.5	2-4,454-452;5-19,450-436	1-1,455-455[UP5];x-x,451-451[BULt];20-21,435-434[UP3]	..(((((((((((((((.(((.&.)))-)))))))))))))))..	ACGUGCUUGCAUGGGGGUCUAU&UUGG-UUUCCAUGUAAGUAUUU	7	174.416	0.952041	5	136.329	0.947729	174.416	136.329	yes
PC-5p-146541_50	TRINITY_DN103684_c0_g2	104	124	115	-29.2	-19.3	0.660959	9	2-13,123-112	1-1,124-124[UP5];14-21,111-104[UP3]	........((((((((((((.&.))))))))))))........	UUGUUGGAACAUGGAAACCAU&UUGGUUUCCAUGUAAGUAUUU	1	24.9165	1	0	0	NA	24.9165	0	yes
PC-5p-146541_50	TRINITY_DN103699_c2_g1	1321	1342	1332	-29.2	-20.4	0.69863	7	1-9,1342-1334;11-13,1331-1329;15-20,1327-1322	10-10,1333-1332[AILt];14-14,1328-1328[SIL];21-21,1321-1321[UP3]	.((((((.(((..(((((((((&)))))))))-.))).)))))).	UAAUGCUGGCAGCGGAAACCAA&UUGGUUUCC-AUGUAAGUAUUU	0	0	NA	1	27.2658	0.996784	0	27.2658	yes
PC-5p-146541_50	TRINITY_DN104019_c0_g1	13	33	24	-29.2	-19.1	0.65411	10	1-14,33-20	15-21,19-13[UP3]	.......((((((((((((((&)))))))))))))).......	GUGGCCGUAUAUGGAAGCCGA&UUGGUUUCCAUGUAAGUAUUU	0	0	NA	1	27.2658	1	0	27.2658	yes
PC-5p-146541_50	TRINITY_DN104456_c1_g2	1903	1922	1913	-29.2	-19.3	0.660959	6.5	1-9,1922-1914;11-13,1912-1910;16-20,1908-1904	10-10,1913-1913[SIL];14-15,1909-1909[AILq];21-21,1903-1903[UP3]	.(((((.-(((.(((((((((&))))))))).)))..))))).	UGAUACG-ACAGGGAAGCCAA&UUGGUUUCCAUGUAAGUAUUU	0	0	NA	1	27.2658	1	0	27.2658	yes
PC-5p-146541_50	TRINITY_DN105276_c0_g1	999	1019	1010	-29.2	-19.3	0.660959	10	4-17,1016-1003	1-3,1019-1017[UP5];18-21,1002-999[UP3]	....((((((((((((((...&...))))))))))))))....	AAGGAUUUGCAUGGAAACAGA&UUGGUUUCCAUGUAAGUAUUU	1	24.9165	1	1	27.2658	1	24.9165	27.2658	yes
PC-5p-146541_50	TRINITY_DN105801_c1_g1	515	533	526	-29.2	-19.7	0.674658	10	1-5,533-529;8-18,528-518	6-7,x-x[BULq];19-21,517-515[UP3]	...(((((((((((--(((((&)))))..)))))))))))...	UUUUACUUACGUGG--GCCGA&UUGGUUUCCAUGUAAGUAUUU	0	0	NA	1	27.2658	0.999974	0	27.2658	yes
PC-5p-146541_50	TRINITY_DN107403_c1_g1	1085	1106	1097	-29.2	-22.5	0.770548	8	1-13,1106-1094;14-17,1092-1089	x-x,1093-1093[BULt];18-21,1088-1085[UP3]	....((((.(((((((((((((&)))))))))))))-))))....	AGUGGCUUGGCAUGGGAACCGA&UUGGUUUCCAUGU-AAGUAUUU	1	24.9165	0.700201	0	0	NA	24.9165	0	yes
PC-5p-146541_50	TRINITY_DN107597_c2_g1	1611	1632	1623	-29.2	-21.2	0.726027	7	2-13,1631-1620;15-21,1617-1611	1-1,1632-1632[UP5];14-14,1619-1618[AILt]	(((((((..((((((((((((.&.))))))))))))-.)))))))	AGAUGCUAAAUAUGGAAGCCGC&UUGGUUUCCAUGU-AAGUAUUU	1	24.9165	0.969832	3	81.7974	0.839556	24.9165	81.7974	yes
PC-5p-146541_50	TRINITY_DN107973_c1_g1	99	121	110	-29.2	-19.48	0.667123	12.5	2-5,120-117;8-18,112-102	1-1,121-121[UP5];6-7,116-113[AILt];19-21,101-99[UP3]	...(((((((((((....((((.&.))))--..)))))))))))...	AUUUGCUUACAUGGCAUUACCAG&UUGGU--UUCCAUGUAAGUAUUU	1	24.9165	1	0	0	NA	24.9165	0	yes
PC-5p-146541_50	TRINITY_DN108163_c0_g1	925	950	940	-29.2	-19	0.650685	9.5	3-5,948-946;6-14,944-936;15-21,931-925	1-2,950-949[UP5];x-x,945-945[BULt];x-x,935-932[BULt]	(((((((....(((((((((.(((..&..)))-)))))))))----)))))))	AAAUGCUAAAAUACAUGGAAUACCUG&UUGGU-UUCCAUGUA----AGUAUUU	0	0	NA	1	27.2658	1	0	27.2658	yes
PC-5p-146541_50	TRINITY_DN108166_c0_g6	602	621	612	-29.2	-19.3	0.660959	9	3-10,619-612;13-21,610-602	1-2,621-620[UP5];11-12,611-611[AILq]	(((((((((.-((((((((..&..))))))))..)))))))))	AAGUACUUGU-UGGGAACCUC&UUGGUUUCCAUGUAAGUAUUU	1	24.9165	1	1	27.2658	1	24.9165	27.2658	yes
PC-5p-146541_50	TRINITY_DN108609_c1_g4	522	544	533	-29.2	-20.8	0.712329	12	1-7,544-538;8-17,535-526	x-x,537-536[BULt];18-21,525-522[UP3]	....((((((((((..(((((((&)))))))--))))))))))....	CAAAGCUUGCAUGGUUGGGCCAA&UUGGUUU--CCAUGUAAGUAUUU	0	0	NA	2	54.5316	0.912817	0	54.5316	yes
PC-5p-146541_50	TRINITY_DN108870_c0_g1	328	348	339	-29.2	-19.56	0.669863	6	1-11,348-338;16-21,333-328	12-15,337-334[SIL]	((((((....(((((((((((&)))))))))))....))))))	AAAUACAGAAAUGGAAGCCAA&UUGGUUUCCAUGUAAGUAUUU	0	0	NA	2	54.5316	0.957788	0	54.5316	yes
PC-5p-146541_50	TRINITY_DN108966_c1_g4	390	410	401	-29.2	-20.7	0.708904	7.5	1-11,410-400;12-13,398-397;16-21,395-390	x-x,399-399[BULt];14-15,396-396[AILq]	((((((.-((.(((((((((((&)))))))))))-))..))))))	GAGUACG-GCUAUGGAAGCCGA&UUGGUUUCCAU-GUAAGUAUUU	3	74.7496	0.637546	6	163.595	0.925515	74.7496	163.595	yes
PC-5p-146541_50	TRINITY_DN109694_c1_g1	760	779	770	-29.2	-19.2	0.657534	9	1-11,779-769;13-17,768-764	12-12,x-x[BULq];18-21,763-760[UP3]	....(((((-(((((((((((&))))))))))).)))))....	AAGGACUUA-GUGGAGGCCAA&UUGGUUUCCAUGUAAGUAUUU	1	24.9165	1	0	0	NA	24.9165	0	yes
PC-5p-146541_50	TRINITY_DN109955_c0_g1	396	416	407	-29.2	-19.5	0.667808	6	2-9,415-408;11-12,406-405;14-20,403-397	1-1,416-416[UP5];10-10,407-407[SIL];13-13,404-404[SIL];21-21,396-396[UP3]	.(((((((.((.((((((((.&.)))))))).)).))))))).	UAAUACUUCCAGGGAAGCCAU&UUGGUUUCCAUGUAAGUAUUU	0	0	NA	2	54.5316	0.999456	0	54.5316	yes
PC-5p-146541_50	TRINITY_DN110359_c4_g2	485	506	497	-29.2	-19.9	0.681507	10	2-11,505-496;13-14,494-493;15-19,491-487	1-1,506-506[UP5];12-12,495-495[SIL];x-x,492-492[BULt];20-21,486-485[UP3]	..(((((.((.((((((((((.&.)))))))))).))-)))))..	UCGUACUCUGGGUGGAAGCCGC&UUGGUUUCCAUGUA-AGUAUUU	1	24.9165	0.99998	0	0	NA	24.9165	0	yes
PC-5p-146541_50	TRINITY_DN110883_c0_g2	1270	1290	1281	-29.2	-20	0.684932	9	1-13,1290-1278	14-21,1277-1270[UP3]	........(((((((((((((&)))))))))))))........	GGGACACCACAUGGAAGCCAA&UUGGUUUCCAUGUAAGUAUUU	9	224.249	0.995328	3	81.7974	0.99456	224.249	81.7974	yes
PC-5p-146541_50	TRINITY_DN111575_c2_g5	414	434	425	-29.2	-20	0.684932	9	1-13,434-422;16-18,419-417	14-15,421-420[SIL];19-21,416-414[UP3]	...(((..(((((((((((((&)))))))))))))..)))...	UAUUAUAAGCGUGGGAGCCAA&UUGGUUUCCAUGUAAGUAUUU	0	0	NA	2	54.5316	0.994115	0	54.5316	yes
PC-5p-146541_50	TRINITY_DN112183_c0_g3	1185	1206	1197	-29.2	-20.1	0.688356	8.5	2-13,1205-1194;16-17,1190-1189	1-1,1206-1206[UP5];14-15,1193-1191[AILt];18-21,1188-1185[UP3]	....((...((((((((((((.&.))))))))))))-..))....	AUUCACGUGGCAUGGAAACCAG&UUGGUUUCCAUGU-AAGUAUUU	0	0	NA	2	54.5316	0.991104	0	54.5316	yes
PC-5p-146541_50	TRINITY_DN112238_c0_g2	818	839	828	-29.2	-19	0.650685	11	1-5,839-835;6-14,832-824;16-19,823-820	x-x,834-833[BULt];15-15,x-x[BULq];20-21,819-818[UP3]	..((((-(((((((((..(((((&)))))--))))))))).))))..	UUGUGC-UACAUGGAGAGGCCGA&UUGGU--UUCCAUGUAAGUAUUU	0	0	NA	1	27.2658	1	0	27.2658	yes
PC-5p-146541_50	TRINITY_DN112285_c1_g1	1123	1143	1134	-29.2	-22	0.753425	6	1-11,1143-1133;13-16,1131-1128;18-21,1126-1123	12-12,1132-1132[SIL];17-17,1127-1127[SIL]	((((.((((.(((((((((((&))))))))))).)))).))))	AAGUUCUUGGGUGGAAACCGA&UUGGUUUCCAUGUAAGUAUUU	6	149.499	0.621663	0	0	NA	149.499	0	yes
PC-5p-146541_50	TRINITY_DN113877_c0_g1	1368	1387	1379	-29.2	-19.3	0.660959	9.5	1-9,1387-1379;11-18,1378-1371	10-10,x-x[BULq];19-21,1370-1368[UP3]	...((((((((-(((((((((&))))))))).))))))))...	GCUUACUUGCG-GGAGGCUAA&UUGGUUUCCAUGUAAGUAUUU	0	0	NA	1	27.2658	1	0	27.2658	yes
PC-5p-146541_50	TRINITY_DN113950_c0_g4	189	210	200	-29.2	-21.6	0.739726	10.5	2-5,209-206;7-17,203-193	1-1,210-210[UP5];6-6,205-204[AILt];18-21,192-189[UP3]	....(((((((((((..((((.&.))))-.)))))))))))....	CCAAGCUUACAUGGACUGCCAU&UUGGU-UUCCAUGUAAGUAUUU	4	99.6661	0.397958	4	109.063	0.424565	99.6661	109.063	yes
PC-5p-146541_50	TRINITY_DN114146_c0_g1	185	205	196	-29.2	-20.48	0.70137	6	2-12,204-194;16-21,190-185	1-1,205-205[UP5];13-15,193-191[SIL]	((((((...(((((((((((.&.)))))))))))...))))))	GAGUACAACCAUGGGAACCAC&UUGGUUUCCAUGUAAGUAUUU	2	49.8331	0.733502	0	0	NA	49.8331	0	yes
PC-5p-146541_50	TRINITY_DN114585_c0_g2	630	650	641	-29.2	-20.1	0.688356	8.5	3-5,648-646;7-13,644-638;15-21,636-630	1-2,650-649[UP5];6-6,645-645[SIL];14-14,637-637[SIL]	(((((((.(((((((.(((..&..))).))))))).)))))))	GGAUGCUGACGUGGACACCUC&UUGGUUUCCAUGUAAGUAUUU	0	0	NA	1	27.2658	0.999694	0	27.2658	yes
PC-5p-146541_50	TRINITY_DN114773_c2_g3	557	577	568	-29.2	-20.2	0.691781	10	3-13,575-565;16-17,562-561	1-2,577-576[UP5];14-15,564-563[SIL];18-21,560-557[UP3]	....((..(((((((((((..&..)))))))))))..))....	UGCAACGGACAUGGAAGCCUU&UUGGUUUCCAUGUAAGUAUUU	0	0	NA	2	54.5316	0.988954	0	54.5316	yes
PC-5p-146541_50	TRINITY_DN115296_c1_g1	1166	1188	1179	-29.2	-21.9	0.75	7.5	1-13,1188-1176;14-18,1173-1169	x-x,1175-1174[BULt];19-21,1168-1166[UP3]	...(((((..(((((((((((((&)))))))))))))--)))))...	CUCUGCUUGGACAUGGGAACCGA&UUGGUUUCCAUGU--AAGUAUUU	8	199.332	0.658093	2	54.5316	0.647532	199.332	54.5316	yes
PC-5p-146541_50	TRINITY_DN115371_c0_g1	970	990	981	-29.2	-22.3	0.763699	11	3-17,988-974	1-2,990-989[UP5];18-21,973-970[UP3]	....(((((((((((((((..&..)))))))))))))))....	UUGAGCUUGCAUGGGAGCUGC&UUGGUUUCCAUGUAAGUAUUU	0	0	NA	2	54.5316	0.272528	0	54.5316	yes
PC-5p-146541_50	TRINITY_DN115778_c0_g2	1367	1387	1378	-29.2	-19.3	0.660959	8.5	1-15,1387-1373	16-21,1372-1367[UP3]	......(((((((((((((((&)))))))))))))))......	ACCAAAUUGCAUGGAAAUCGA&UUGGUUUCCAUGUAAGUAUUU	3	74.7496	0.99987	0	0	NA	74.7496	0	yes
PC-5p-146541_50	TRINITY_DN116331_c0_g2	192	216	204	-29.2	-20.7	0.708904	7	1-4,216-213;5-17,209-197;18-21,195-192	x-x,212-210[BULt];x-x,196-196[BULt]	((((.(((((((((((((...((((&))))---)))))))))))))-))))	AAAUCACUUACAUGGAAAAUCCCAA&UUGG---UUUCCAUGUAAGU-AUUU	0	0	NA	1	27.2658	0.986276	0	27.2658	yes
PC-5p-146541_50	TRINITY_DN116748_c2_g1	1547	1575	1558	-29.2	-20	0.684932	20	1-9,1575-1567;10-18,1558-1550	x-x,1566-1559[BULt];19-21,1549-1547[UP3]	...(((((((((........(((((((((&)))))))))--------)))))))))...	UUUUACUUACAUGAAGGAUGGGAAGCCAA&UUGGUUUCC--------AUGUAAGUAUUU	1	24.9165	0.999948	0	0	NA	24.9165	0	yes
PC-5p-146541_50	TRINITY_DN117336_c0_g1	629	649	640	-29.2	-19.3	0.660959	10.5	1-13,649-637	14-21,636-629[UP3]	........(((((((((((((&)))))))))))))........	AGGGUGGAACAUGGAGGCCAG&UUGGUUUCCAUGUAAGUAUUU	0	0	NA	2	54.5316	0.999921	0	54.5316	yes
PC-5p-146541_50	TRINITY_DN118082_c0_g1	183	206	197	-29.2	-20.5	0.702055	10.5	1-10,206-197;11-14,194-191;15-21,189-183	x-x,196-195[BULt];x-x,190-190[BULt]	(((((((.((((..((((((((((&))))))))))--))))-)))))))	GAGUACUGUGCGUUUGGGAGCCGA&UUGGUUUCCA--UGUA-AGUAUUU	1	24.9165	0.998399	0	0	NA	24.9165	0	yes
PC-5p-146541_50	TRINITY_DN118393_c0_g1	1645	1667	1658	-29.2	-20.18	0.691096	12.5	1-10,1667-1658;13-19,1653-1647	11-12,1657-1654[AILt];20-21,1646-1645[UP3]	..(((((((....((((((((((&))))))))))--..)))))))..	GUGUGCUUGAAUUUGGAGACCAA&UUGGUUUCCA--UGUAAGUAUUU	1	24.9165	0.999871	0	0	NA	24.9165	0	yes
PC-5p-146541_50	TRINITY_DN118566_c1_g2	948	970	961	-29.2	-21	0.719178	9	2-11,969-960;13-14,958-957;15-21,954-948	1-1,970-970[UP5];12-12,959-959[SIL];x-x,956-955[BULt]	(((((((..((.((((((((((.&.)))))))))).))--)))))))	AGGUACUGAUAGGUGGAGGCCAG&UUGGUUUCCAUGUA--AGUAUUU	2	49.8331	0.564098	0	0	NA	49.8331	0	yes
PC-5p-146541_50	TRINITY_DN118937_c1_g1	675	697	687	-29.2	-19.3	0.660959	6.5	1-9,697-689;11-15,686-682;16-21,680-675	10-10,688-687[AILt];x-x,681-681[BULt]	((((((.(((((..(((((((((&)))))))))-.)))))-))))))	AGAUAUAUUGCAAGGGAAACCAA&UUGGUUUCC-AUGUAA-GUAUUU	2	49.8331	0.971986	0	0	NA	49.8331	0	yes
PC-5p-146541_50	TRINITY_DN119087_c0_g1	886	908	898	-29.2	-21.2	0.726027	7.5	1-9,908-900;11-16,897-892;17-21,890-886	10-10,899-898[AILt];x-x,891-891[BULt]	(((((.((((((..(((((((((&)))))))))-.))))))-)))))	AAAUAUCUUGCAAGGGAAGCCGA&UUGGUUUCC-AUGUAAG-UAUUU	0	0	NA	1	27.2658	0.945091	0	27.2658	yes
PC-5p-146541_50	TRINITY_DN119187_c1_g1	1012	1032	1023	-29.2	-20.2	0.691781	10	5-19,1028-1014	1-4,1032-1029[UP5];20-21,1013-1012[UP3]	..(((((((((((((((....&....)))))))))))))))..	ACAUGCUUGCAUGGAAAGGAU&UUGGUUUCCAUGUAAGUAUUU	0	0	NA	2	54.5316	0.98938	0	54.5316	yes
PC-5p-146541_50	TRINITY_DN119411_c0_g2	2138	2158	2149	-29.2	-19.1	0.65411	12	3-14,2156-2145	1-2,2158-2157[UP5];15-21,2144-2138[UP3]	.......((((((((((((..&..)))))))))))).......	CCACAUAUACGUGGAAGCCGU&UUGGUUUCCAUGUAAGUAUUU	1	24.9165	1	0	0	NA	24.9165	0	yes
PC-5p-146541_50	TRINITY_DN119536_c1_g1	247	267	258	-29.2	-21.5	0.736301	10	3-17,265-251	1-2,267-266[UP5];18-21,250-247[UP3]	....(((((((((((((((..&..)))))))))))))))....	GGGGAUUUGCAUGGGGACCUC&UUGGUUUCCAUGUAAGUAUUU	0	0	NA	1	27.2658	0.898674	0	27.2658	yes
PC-5p-146541_50	TRINITY_DN119626_c2_g1	958	979	969	-29.2	-19.2	0.657534	10.5	2-4,978-976;5-17,974-962	1-1,979-979[UP5];x-x,975-975[BULt];18-21,961-958[UP3]	....(((((((((((((.(((.&.)))-)))))))))))))....	AGACGCUUAUGUGGAGAUCCAC&UUGG-UUUCCAUGUAAGUAUUU	0	0	NA	2	54.5316	0.985667	0	54.5316	yes
PC-5p-146541_50	TRINITY_DN119964_c3_g1	524	543	535	-29.2	-20.7	0.708904	6.5	2-8,542-536;10-19,535-526	1-1,543-543[UP5];9-9,x-x[BULq];20-21,525-524[UP3]	..((((((((((-(((((((.&.))))))).))))))))))..	ACAUGCUUACAU-GAGACCAC&UUGGUUUCCAUGUAAGUAUUU	1	24.9165	0.995407	0	0	NA	24.9165	0	yes
PC-5p-146541_50	TRINITY_DN120041_c1_g1	2088	2108	2099	-29.2	-24.2	0.828767	5	2-21,2107-2088	1-1,2108-2108[UP5]	((((((((((((((((((((.&.))))))))))))))))))))	AGAUGCUUAUGUGGAAAUCAU&UUGGUUUCCAUGUAAGUAUUU	1	24.9165	0.339062	0	0	NA	24.9165	0	yes
PC-5p-146541_50	TRINITY_DN120542_c1_g4	492	513	503	-29.2	-19.3	0.660959	11	2-5,512-509;7-9,507-505;11-19,502-494	1-1,513-513[UP5];6-6,508-508[SIL];10-10,504-503[AILt];20-21,493-492[UP3]	..(((((((((..(((.((((.&.)))).)))-.)))))))))..	GCAUGCUUGCAGAGGACGCCAU&UUGGUUUCC-AUGUAAGUAUUU	3	74.7496	0.999873	4	109.063	0.999836	74.7496	109.063	yes
PC-5p-146541_50	TRINITY_DN120610_c0_g1	355	375	366	-29.2	-18.98	0.65	6.5	1-12,375-364;16-18,360-358	13-15,363-361[SIL];19-21,357-355[UP3]	...(((...((((((((((((&))))))))))))...)))...	AGUUGCAGCCAUGGAAACCAA&UUGGUUUCCAUGUAAGUAUUU	0	0	NA	1	27.2658	1	0	27.2658	yes
PC-5p-146541_50	TRINITY_DN120924_c3_g3	516	536	527	-29.2	-21.7	0.743151	8	3-13,534-524;16-21,521-516	1-2,536-535[UP5];14-15,523-522[SIL]	((((((..(((((((((((..&..)))))))))))..))))))	AAAUGCAGGCAUGGGAGCCUU&UUGGUUUCCAUGUAAGUAUUU	0	0	NA	1	27.2658	0.845911	0	27.2658	yes
PC-5p-146541_50	TRINITY_DN121287_c2_g1	734	755	745	-29.2	-19.2	0.657534	8.5	1-5,755-751;7-9,749-747;10-17,745-738	6-6,750-750[SIL];x-x,746-746[BULt];18-21,737-734[UP3]	....((((((((.(((.(((((&))))).)))-))))))))....	GCUAACUUGCAUAGGACACCAA&UUGGUUUCC-AUGUAAGUAUUU	0	0	NA	1	27.2658	1	0	27.2658	yes
PC-5p-146541_50	TRINITY_DN121291_c1_g1	1503	1528	1514	-29.2	-20.2	0.691781	17.5	3-6,1526-1523;7-21,1517-1503	1-2,1528-1527[UP5];x-x,1522-1518[BULt]	(((((((((((((((.....((((..&..))))-----)))))))))))))))	GGAUGCUUAUAUGGAUGUUAGGCCCA&UUGGUU-----UCCAUGUAAGUAUUU	13	323.915	0.990508	5	136.329	0.989169	323.915	136.329	yes
PC-5p-146541_50	TRINITY_DN121560_c1_g1	957	977	968	-29.2	-19.6	0.671233	7.5	1-11,977-967;13-15,965-963;17-20,961-958	12-12,966-966[SIL];16-16,962-962[SIL];21-21,957-957[UP3]	.((((.(((.(((((((((((&))))))))))).))).)))).	UGAUGGUUGGAUGGAGAUCAA&UUGGUUUCCAUGUAAGUAUUU	1	24.9165	0.999998	2	54.5316	0.948393	24.9165	54.5316	yes
PC-5p-146541_50	TRINITY_DN121816_c2_g1	2646	2667	2658	-29.2	-21.2	0.726027	5	1-15,2667-2653;16-20,2651-2647	x-x,2652-2652[BULt];21-21,2646-2646[UP3]	.(((((.(((((((((((((((&)))))))))))))))-))))).	CAGUAUAUUACAUGGAAGCUAA&UUGGUUUCCAUGUAA-GUAUUU	1	24.9165	0.963585	0	0	NA	24.9165	0	yes
PC-5p-146541_50	TRINITY_DN121839_c1_g1	1402	1423	1414	-29.2	-20.7	0.708904	8.5	1-13,1423-1411;14-18,1409-1405	x-x,1410-1410[BULt];19-21,1404-1402[UP3]	...(((((.(((((((((((((&)))))))))))))-)))))...	AACUACUUAGCGUGGAGGCUAA&UUGGUUUCCAUGU-AAGUAUUU	0	0	NA	1	27.2658	0.987133	0	27.2658	yes
PC-5p-146541_50	TRINITY_DN122075_c1_g1	2224	2247	2238	-29.2	-19.22	0.658219	9.5	1-13,2247-2235;16-20,2229-2225	14-15,2234-2230[AILt];21-21,2224-2224[UP3]	.(((((.....(((((((((((((&)))))))))))))---..))))).	CAGUACAGCAGGCAUGGAAGCUAG&UUGGUUUCCAUGU---AAGUAUUU	1	24.9165	1	0	0	NA	24.9165	0	yes
PC-5p-146541_50	TRINITY_DN122147_c1_g4	109	129	120	-29.2	-23.8	0.815068	6.5	1-17,129-113	18-21,112-109[UP3]	....(((((((((((((((((&)))))))))))))))))....	AAACACUUGCAUGGAGAUCAA&UUGGUUUCCAUGUAAGUAUUU	0	0	NA	2	54.5316	0.225688	0	54.5316	yes
PC-5p-146541_50	TRINITY_DN122358_c1_g1	1379	1401	1390	-29.2	-22.8	0.780822	9.5	1-6,1401-1396;7-18,1393-1382	x-x,1395-1394[BULt];19-21,1381-1379[UP3]	...((((((((((((..((((((&))))))--))))))))))))...	UACUGCUUACAUGGAUUAGCCGA&UUGGUU--UCCAUGUAAGUAUUU	0	0	NA	2	54.5316	0.208993	0	54.5316	yes
PC-5p-146541_50	TRINITY_DN122575_c2_g2	802	822	813	-29.2	-19.16	0.656164	6.5	1-11,822-812;16-21,807-802	12-15,811-808[SIL]	((((((....(((((((((((&)))))))))))....))))))	AAAUGCCCCUGUGGAAACCAA&UUGGUUUCCAUGUAAGUAUUU	1	24.9165	1	7	190.861	0.999962	24.9165	190.861	yes
PC-5p-146541_50	TRINITY_DN122678_c2_g1	139	158	150	-29.2	-19.7	0.674658	8	2-5,157-154;8-18,152-142	1-1,158-158[UP5];6-7,153-153[AILq];19-21,141-139[UP3]	...(((((((((((.-((((.&.))))..)))))))))))...	AGCUACUUACAUGGC-ACCAU&UUGGUUUCCAUGUAAGUAUUU	0	0	NA	1	27.2658	0.999982	0	27.2658	yes
PC-5p-146541_50	TRINITY_DN122996_c2_g1	291	311	302	-29.2	-19.3	0.660959	10	1-13,311-299	14-21,298-291[UP3]	........(((((((((((((&)))))))))))))........	GGCUAGCCGCAUGGGAACCAG&UUGGUUUCCAUGUAAGUAUUU	0	0	NA	2	54.5316	0.283417	0	54.5316	yes
PC-5p-146541_50	TRINITY_DN123020_c1_g2	325	345	336	-29.2	-20.18	0.691096	6.5	1-11,345-335;15-20,331-326	12-14,334-332[SIL];21-21,325-325[UP3]	.((((((...(((((((((((&)))))))))))...)))))).	UAAUGCUCAAAUGGAGACCAA&UUGGUUUCCAUGUAAGUAUUU	2	49.8331	0.991763	0	0	NA	49.8331	0	yes
PC-5p-146541_50	TRINITY_DN123289_c0_g1	252	274	263	-29.2	-20.7	0.708904	9.5	2-6,273-269;7-19,266-254	1-1,274-274[UP5];x-x,268-267[BULt];20-21,253-252[UP3]	..(((((((((((((..(((((.&.)))))--)))))))))))))..	ACAUGCUUAUAUGGAGCAACCGG&UUGGUU--UCCAUGUAAGUAUUU	5	124.583	0.672021	0	0	NA	124.583	0	yes
PC-5p-146541_50	TRINITY_DN124059_c3_g1	1235	1256	1246	-29.2	-19.3	0.660959	8	3-5,1254-1252;6-12,1250-1244;14-20,1242-1236	1-2,1256-1255[UP5];x-x,1251-1251[BULt];13-13,1243-1243[SIL];21-21,1235-1235[UP3]	.(((((((.(((((((.(((..&..)))-))))))).))))))).	UGAUGCUUUCAUGGAAUACCUU&UUGGU-UUCCAUGUAAGUAUUU	1	24.9165	1	1	27.2658	1	24.9165	27.2658	yes
PC-5p-146541_50	TRINITY_DN124270_c2_g1	2176	2197	2187	-29.2	-21.2	0.726027	9.5	3-9,2195-2189;11-21,2186-2176	1-2,2197-2196[UP5];10-10,2188-2187[AILt]	(((((((((((..(((((((..&..)))))))-.)))))))))))	GGAUGCUUACACAGGGAACCCG&UUGGUUUCC-AUGUAAGUAUUU	0	0	NA	2	54.5316	0.513292	0	54.5316	yes
PC-5p-146541_50	TRINITY_DN124416_c4_g4	148	171	159	-29.2	-20.3	0.695205	12	1-7,171-165;8-20,161-149	x-x,164-162[BULt];21-21,148-148[UP3]	.(((((((((((((...(((((((&)))))))---))))))))))))).	CGGUGCUUACGUGGGGAGAAUCAG&UUGGUUU---CCAUGUAAGUAUUU	0	0	NA	1	27.2658	0.998517	0	27.2658	yes
PC-5p-146541_50	TRINITY_DN124828_c6_g1	4596	4615	4606	-29.2	-19.4	0.664384	9	2-5,4614-4611;8-14,4608-4602;16-20,4601-4597	1-1,4615-4615[UP5];6-7,4610-4609[SIL];15-15,x-x[BULq];21-21,4596-4596[UP3]	.(((((-(((((((..((((.&.))))..))))))).))))).	CGGUGC-UGCAUGGUUACCAU&UUGGUUUCCAUGUAAGUAUUU	1	24.9165	1	0	0	NA	24.9165	0	yes
PC-5p-146541_50	TRINITY_DN124903_c2_g1	1379	1399	1390	-29.2	-19.8	0.678082	9.5	1-13,1399-1387	14-21,1386-1379[UP3]	........(((((((((((((&)))))))))))))........	GCUGUUGAACAUGGAGACCAG&UUGGUUUCCAUGUAAGUAUUU	1	24.9165	0.999993	1	27.2658	0.999964	24.9165	27.2658	yes
PC-5p-146541_50	TRINITY_DN124946_c1_g3	2979	3000	2990	-29.2	-19.9	0.681507	11.5	4-6,2997-2995;8-21,2992-2979	1-3,3000-2998[UP5];7-7,2994-2993[AILt]	((((((((((((((..(((...&...)))-.))))))))))))))	AGGUACUUGCAUGGUCGACAGU&UUGGUU-UCCAUGUAAGUAUUU	2	49.8331	0.99682	0	0	NA	49.8331	0	yes
PC-5p-146541_50	TRINITY_DN125018_c2_g3	435	456	447	-29.2	-19.3	0.660959	8.5	2-14,455-443;16-19,440-437	1-1,456-456[UP5];15-15,442-441[AILt];20-21,436-435[UP3]	..((((..(((((((((((((.&.)))))))))))))-.))))..	GCAUACGAUGCAUGGGGAUCAC&UUGGUUUCCAUGUA-AGUAUUU	1	24.9165	1	0	0	NA	24.9165	0	yes
PC-5p-146541_50	TRINITY_DN125095_c1_g3	76	96	87	-29.2	-19.8	0.678082	9	1-13,96-84	14-21,83-76[UP3]	........(((((((((((((&)))))))))))))........	UGAAGUUCACAUGGAAGCCAA&UUGGUUUCCAUGUAAGUAUUU	3	74.7496	0.913264	7	190.861	0.930238	74.7496	190.861	yes
PC-5p-146541_50	TRINITY_DN125148_c7_g2	669	689	680	-29.2	-19.1	0.65411	10.5	3-17,687-673	1-2,689-688[UP5];18-21,672-669[UP3]	....(((((((((((((((..&..)))))))))))))))....	GAGGAUUUACAUGGGGACUUG&UUGGUUUCCAUGUAAGUAUUU	2	49.8331	0.999985	0	0	NA	49.8331	0	yes
PC-5p-146541_50	TRINITY_DN90289_c1_g1	246	266	257	-29.2	-19	0.650685	11.5	1-3,266-264;5-11,262-256;13-17,254-250	4-4,263-263[SIL];12-12,255-255[SIL];18-21,249-246[UP3]	....(((((.(((((((.(((&))).))))))).)))))....	CGCAGCUUAGGUGGAAGGCGA&UUGGUUUCCAUGUAAGUAUUU	0	0	NA	4	109.063	0.991254	0	109.063	yes
PC-5p-146541_50	TRINITY_DN90632_c0_g3	220	240	231	-29.2	-22.5	0.770548	8	3-19,238-222	1-2,240-239[UP5];20-21,221-220[UP3]	..(((((((((((((((((..&..)))))))))))))))))..	UUAUACUUAUAUGGAAGCUGU&UUGGUUUCCAUGUAAGUAUUU	0	0	NA	3	81.7974	0.0196459	0	81.7974	yes
PC-5p-146541_50	TRINITY_DN90887_c0_g1	710	730	721	-29.2	-20.5	0.702055	10	1-12,730-719;15-17,716-714	13-14,718-717[SIL];18-21,713-710[UP3]	....(((..((((((((((((&))))))))))))..)))....	CCAAGCUCUCGUGGGAGCCAG&UUGGUUUCCAUGUAAGUAUUU	0	0	NA	2	54.5316	0.961088	0	54.5316	yes
PC-5p-146541_50	TRINITY_DN92548_c1_g1	821	839	830	-29.2	-19.4	0.664384	7.5	2-10,838-830;13-20,829-822	1-1,839-839[UP5];11-12,x-x[BULq];21-21,821-821[UP3]	.((((((((--(((((((((.&.)))))))))..)))))))).	UAAUGCUUA--UGGAAGCCAU&UUGGUUUCCAUGUAAGUAUUU	4	99.6661	0.290113	3	81.7974	0.99978	99.6661	81.7974	yes
PC-5p-146541_50	TRINITY_DN93088_c0_g2	559	576	567	-29.2	-19.3	0.660959	7	2-12,575-565;16-20,564-560	1-1,576-576[UP5];13-15,x-x[BULq];21-21,559-559[UP3]	.(((((---(((((((((((.&.)))))))))))...))))).	UGAUGC---CAUGGAGACCAC&UUGGUUUCCAUGUAAGUAUUU	8	199.332	0.999892	8	218.126	0.977093	199.332	218.126	yes
PC-5p-146541_50	TRINITY_DN94715_c0_g1	923	943	934	-29.2	-22.2	0.760274	8	1-13,943-931;16-19,928-925	14-15,930-929[SIL];20-21,924-923[UP3]	..((((..(((((((((((((&)))))))))))))..))))..	AUAUGCCAGCAUGGGAGCCGA&UUGGUUUCCAUGUAAGUAUUU	2	49.8331	0.27596	0	0	NA	49.8331	0	yes
PC-5p-146541_50	TRINITY_DN95222_c0_g1	662	683	674	-29.2	-19.7	0.674658	8	1-12,683-672;13-17,670-666	x-x,671-671[BULt];18-21,665-662[UP3]	....(((((.((((((((((((&))))))))))))-)))))....	CAUAACUUACCAUGGAAACUGA&UUGGUUUCCAUG-UAAGUAUUU	1	24.9165	0.999996	2	54.5316	0.938472	24.9165	54.5316	yes
PC-5p-146541_50	TRINITY_DN95846_c0_g1	545	566	556	-29.2	-20	0.684932	7.5	1-8,566-559;9-9,557-557;11-21,555-545	x-x,558-558[BULt];10-10,556-556[SIL]	(((((((((((.(.((((((((&))))))))-).)))))))))))	AGAUGCUUGCACGUGAGAUCAA&UUGGUUUC-CAUGUAAGUAUUU	5	124.583	0.995603	0	0	NA	124.583	0	yes
PC-5p-146541_50	TRINITY_DN96439_c0_g1	290	311	301	-29.2	-19.3	0.660959	10	2-6,310-306;7-17,304-294	1-1,311-311[UP5];x-x,305-305[BULt];18-21,293-290[UP3]	....(((((((((((.(((((.&.)))))-)))))))))))....	AAAAACUUAUAUGGAUAGCCGC&UUGGUU-UCCAUGUAAGUAUUU	4	99.6661	0.999902	0	0	NA	99.6661	0	yes
PC-5p-146541_50	TRINITY_DN97276_c1_g1	11	31	22	-29.2	-19.8	0.678082	10	1-9,31-23;11-17,21-15	10-10,22-22[SIL];18-21,14-11[UP3]	....(((((((.(((((((((&))))))))).)))))))....	AAGAGCUUGCAAGGGAGCUAA&UUGGUUUCCAUGUAAGUAUUU	1	24.9165	0.999987	0	0	NA	24.9165	0	yes
PC-5p-146541_50	TRINITY_DN98370_c2_g3	458	480	469	-29.2	-20.4	0.69863	8	2-5,479-476;6-13,473-466;15-20,464-459	1-1,480-480[UP5];x-x,475-474[BULt];14-14,465-465[SIL];21-21,458-458[UP3]	.((((((.((((((((..((((.&.))))--)))))))).)))))).	UGAUGCUGACAUGGAAUCACCAG&UUGGU--UUCCAUGUAAGUAUUU	0	0	NA	2	54.5316	0.804611	0	54.5316	yes
PC-5p-146541_50	TRINITY_DN99667_c0_g1	19	41	32	-29.2	-19.78	0.677397	7.5	1-13,41-29;16-21,24-19	14-15,28-25[AILt]	((((((....(((((((((((((&)))))))))))))--..))))))	AAAUAUAAACACAUGGGAGCCGA&UUGGUUUCCAUGU--AAGUAUUU	1	24.9165	0.999994	0	0	NA	24.9165	0	yes
PC-5p-146541_50	TRINITY_DN99839_c0_g1	1049	1069	1060	-29.2	-20.28	0.694521	7	1-12,1069-1058;16-21,1054-1049	13-15,1057-1055[SIL]	((((((...((((((((((((&))))))))))))...))))))	GGGUGCGCUUAUGGAAACCGA&UUGGUUUCCAUGUAAGUAUUU	2	49.8331	0.98714	0	0	NA	49.8331	0	yes
PC-5p-147401_49	TRINITY_DN101060_c1_g1	308	331	321	-33.1	-22.9	0.691843	9.5	1-6,331-326;8-11,323-320;13-23,318-308	7-7,325-324[AILt];12-12,319-319[SIL]	(((((((((((.((((..((((((&))))))-.)))).)))))))))))	AAGUCUCAGAAAAAGCGGGCAGGA&UUUUGU-GGCUUAUUUUGAGACUU	173	4310.56	0.0667958	22	599.847	0.0696093	4310.56	599.847	yes
PC-5p-147401_49	TRINITY_DN108301_c0_g1	7	29	20	-33.1	-21.82	0.659215	8.5	1-12,29-18;19-23,11-7	13-18,17-12[SIL]	(((((......((((((((((((&))))))))))))......)))))	GAGUCGGCAUUUAAGCCGCAGAA&UUUUGUGGCUUAUUUUGAGACUU	11	274.082	0.993408	0	0	NA	274.082	0	yes
PC-5p-147401_49	TRINITY_DN112226_c0_g1	195	217	208	-33.1	-22.1	0.667674	6.5	1-16,217-202;18-19,200-199;21-23,197-195	17-17,201-201[SIL];20-20,198-198[SIL]	(((.((.((((((((((((((((&)))))))))))))))).)).)))	AAGCCUGGGAAUGGGCUACAAAG&UUUUGUGGCUUAUUUUGAGACUU	1	24.9165	0.999571	0	0	NA	24.9165	0	yes
PC-5p-147401_49	TRINITY_DN113277_c3_g2	567	590	580	-33.1	-21.9	0.661631	9	2-5,589-586;7-8,584-583;9-11,581-579;13-23,577-567	1-1,590-590[UP5];6-6,585-585[SIL];x-x,582-582[BULt];12-12,578-578[SIL]	(((((((((((.(((.((.((((.&.)))).))-))).)))))))))))	GAGUCUCAGAACAAGACCUCAGAG&UUUUGUGG-CUUAUUUUGAGACUU	1	24.9165	0.999856	0	0	NA	24.9165	0	yes
PC-5p-147401_49	TRINITY_DN113921_c0_g2	889	916	907	-33.1	-22.1	0.667674	11.5	2-14,915-903;15-23,897-889	1-1,916-916[UP5];x-x,902-898[BULt]	(((((((((.....(((((((((((((.&.)))))))))))))-----)))))))))	AGGUCUCAGGGACUAGUAGGUUACAGAU&UUUUGUGGCUUAUU-----UUGAGACUU	2	49.8331	0.986334	1	27.2658	0.998926	49.8331	27.2658	yes
PC-5p-147401_49	TRINITY_DN114744_c0_g1	1272	1297	1288	-33.1	-21.64	0.653776	14	2-11,1296-1287;13-16,1282-1279;18-22,1277-1273	1-1,1297-1297[UP5];12-12,1286-1283[AILt];17-17,1278-1278[SIL];23-23,1272-1272[UP3]	.(((((.((((....((((((((((.&.))))))))))---.)))).))))).	CAGUCUGGAAGAGAAGAGCCACGAAG&UUUUGUGGCUU---AUUUUGAGACUU	1	24.9165	0.999969	1	27.2658	0.999864	24.9165	27.2658	yes
PC-5p-147401_49	TRINITY_DN115948_c0_g1	211	232	223	-33.1	-25	0.755287	7.5	3-19,230-214;21-23,213-211	1-2,232-231[UP5];20-20,x-x[BULq]	(((-(((((((((((((((((..&..))))))))))))))))).)))	GAG-CUCAAAAUGGGCUACAACA&UUUUGUGGCUUAUUUUGAGACUU	0	0	NA	2	54.5316	0.313941	0	54.5316	yes
PC-5p-147401_49	TRINITY_DN116495_c0_g1	237	258	249	-33.1	-21.8	0.65861	9.5	1-4,258-255;6-9,253-250;12-17,247-242;19-23,241-237	5-5,254-254[SIL];10-11,249-248[SIL];18-18,x-x[BULq]	(((((-((((((..((((.((((&)))).))))..)))))).)))))	GAGUC-CAGAGUUUGCCAGAAGA&UUUUGUGGCUUAUUUUGAGACUU	0	0	NA	1	27.2658	0.999684	0	27.2658	yes
PC-5p-147401_49	TRINITY_DN119323_c0_g1	698	721	712	-33.1	-22.4	0.676737	11	2-9,720-713;12-20,710-702;21-23,700-698	1-1,721-721[UP5];10-11,712-711[SIL];x-x,701-701[BULt]	(((.(((((((((..((((((((.&.))))))))..)))))))))-)))	GAGCUCUUAGAGUUUGCCGCGGAU&UUUUGUGGCUUAUUUUGAGA-CUU	6	149.499	0.737568	4	109.063	0.967403	149.499	109.063	yes
PC-5p-147401_49	TRINITY_DN119391_c1_g3	205	227	218	-33.1	-23.8	0.719033	8	1-4,227-224;6-16,222-212;18-23,210-205	5-5,223-223[SIL];17-17,211-211[SIL]	((((((.(((((((((((.((((&)))).))))))))))).))))))	GAGUCUGAGAGUGAGUCGGAAAG&UUUUGUGGCUUAUUUUGAGACUU	3	74.7496	0.813756	1	27.2658	0.931187	74.7496	27.2658	yes
PC-5p-147401_49	TRINITY_DN120237_c3_g2	6774	6800	6791	-33.1	-21.8	0.65861	16.5	4-10,6797-6791;11-23,6786-6774	1-3,6800-6798[UP5];x-x,6790-6787[BULt]	(((((((((((((....(((((((...&...)))))))----)))))))))))))	AAGUCUCAAAGUGGAGCAGCUAUAUAA&UUUUGUGGCU----UAUUUUGAGACUU	1	24.9165	0.999921	1	27.2658	0.999694	24.9165	27.2658	yes
PC-5p-147401_49	TRINITY_DN121579_c0_g3	655	675	666	-33.1	-22.26	0.672508	10	1-10,675-666;16-22,662-656	11-15,665-663[AILq];23-23,655-655[UP3]	.(((((((...--((((((((((&)))))))))).....))))))).	UGGUCUCAUUC--AGCCACAAGG&UUUUGUGGCUUAUUUUGAGACUU	1	24.9165	0.999327	1	27.2658	0.99808	24.9165	27.2658	yes
PC-5p-147401_49	TRINITY_DN123849_c5_g2	241	263	254	-33.1	-22.8	0.688822	12	6-16,258-248;18-23,246-241	1-5,263-259[UP5];17-17,247-247[SIL]	((((((.(((((((((((.....&.....))))))))))).))))))	GGGUCUGAGGAUAAGCCAAUGAU&UUUUGUGGCUUAUUUUGAGACUU	1	24.9165	0.989874	0	0	NA	24.9165	0	yes
PC-5p-147401_49	TRINITY_DN124604_c4_g1	2522	2542	2533	-33.1	-21.84	0.659819	11	1-10,2542-2533;17-23,2528-2522	11-16,2532-2529[AILq]	(((((((....--((((((((((&))))))))))......)))))))	GGGUCUCCUUU--AGCCGCAGAA&UUUUGUGGCUUAUUUUGAGACUU	0	0	NA	3	81.7974	0.87252	0	81.7974	yes
PC-5p-147401_49	TRINITY_DN125098_c4_g1	416	435	426	-33.1	-24.2	0.731118	8.5	3-11,433-425;15-23,424-416	1-2,435-434[UP5];12-14,x-x[BULq]	(((((((((---(((((((((..&..)))))))))...)))))))))	GAGUCUCAA---AAGCCACGAUU&UUUUGUGGCUUAUUUUGAGACUU	0	0	NA	1	27.2658	0.877046	0	27.2658	yes
PC-5p-147401_49	TRINITY_DN98963_c1_g1	831	853	844	-33.1	-24.1	0.728097	8.5	3-11,851-843;14-22,840-832	1-2,853-852[UP5];12-13,842-841[SIL];23-23,831-831[UP3]	.(((((((((..(((((((((..&..)))))))))..))))))))).	CGGUUUCAGAUCAAGCCACAACU&UUUUGUGGCUUAUUUUGAGACUU	1	24.9165	0.922685	0	0	NA	24.9165	0	yes
PC-5p-147401_49	TRINITY_DN99076_c2_g1	83	105	96	-33.1	-22.7	0.685801	7	1-11,105-95;13-18,94-89;19-23,87-83	12-12,x-x[BULq];x-x,88-88[BULt]	(((((.((((((-(((((((((((&))))))))))).))))))-)))))	AGGUCAUCGAAA-GAGCUACAAGA&UUUUGUGGCUUAUUUUGA-GACUU	1	24.9165	0.993793	0	0	NA	24.9165	0	yes
PC-5p-148554_49	TRINITY_DN107784_c0_g1	440	466	455	-47.4	-34.1	0.719409	8.5	1-3,466-464;4-6,461-459;8-15,457-450;16-24,448-440	x-x,463-462[BULt];7-7,458-458[SIL];x-x,449-449[BULt]	(((((((((.((((((((.(((..(((&)))--))).))))))))-)))))))))	GCCUUUUGGCCGAGGGCACGUCUGCCU&AGG--GACAUGUCCUCG-CCAAAAGGU	0	0	NA	1	27.2658	0.202056	0	27.2658	yes
PC-5p-1494_3633	TRINITY_DN105681_c0_g1	273	304	286	-39.3	-26.3	0.669211	21	1-3,304-302;4-9,298-293;10-20,286-276	x-x,301-299[BULt];x-x,292-287[BULt];21-23,275-273[UP3]	...(((((((((((......((((((...(((&)))---))))))------)))))))))))...	UUGGUGAGAGAAGUAUUUUUUGCAUCUUGGAG&CUC---GAUGCA------ACUUCUCUCACAUU	3	74.7496	0.224086	5	136.329	0.477583	74.7496	136.329	yes
PC-5p-1494_3633	TRINITY_DN107409_c1_g3	127	148	139	-39.3	-26.8	0.681934	7.5	1-4,148-145;6-6,143-143;8-18,141-131;20-23,130-127	5-5,144-144[SIL];7-7,142-142[SIL];19-19,x-x[BULq]	((((-(((((((((((.(.((((&)))).).))))))))))).))))	GGUG-GAGGGAAGUUGGGCCGAG&CUCGAUGCAACUUCUCUCACAUU	0	0	NA	1	27.2658	0.538783	0	27.2658	yes
PC-5p-1494_3633	TRINITY_DN113898_c0_g1	232	252	245	-39.3	-27.68	0.704326	10	1-6,252-247;11-23,244-232	7-10,246-245[AILq]	(((((((((((((..--((((((&))))))....)))))))))))))	AGUGUGGGAGAAGGA--GUCGAG&CUCGAUGCAACUUCUCUCACAUU	1	24.9165	0.339062	0	0	NA	24.9165	0	yes
PC-5p-1494_3633	TRINITY_DN116482_c3_g3	667	690	682	-39.3	-26.1	0.664122	8.5	1-9,690-682;11-14,681-678;15-23,675-667	10-10,x-x[BULq];x-x,677-676[BULt]	(((((((((..((((-(((((((((&))))))))).))))--)))))))))	GAUGUGGGACUGGAG-UGUGUCGGG&CUCGAUGCAACUUC--UCUCACAUU	1	24.9165	0.760813	0	0	NA	24.9165	0	yes
PC-5p-1494_3633	TRINITY_DN116796_c0_g2	2073	2102	2086	-39.3	-26.6	0.676845	17.5	1-5,2102-2098;6-9,2092-2089;10-20,2086-2076	x-x,2097-2093[BULt];x-x,2088-2087[BULt];21-23,2075-2073[UP3]	...(((((((((((..((((.....(((((&)))))-----))))--)))))))))))...	GAAGUGAGGGAAGUUCUGCAAUAUAUCGAG&CUCGA-----UGCA--ACUUCUCUCACAUU	2	49.8331	0.455279	0	0	NA	49.8331	0	yes
PC-5p-1494_3633	TRINITY_DN116972_c3_g1	871	894	884	-39.3	-26.1	0.664122	10	2-3,893-892;6-23,888-871	1-1,894-894[UP5];4-5,891-889[AILt]	((((((((((((((((((...((.&.))-..))))))))))))))))))	AGUGUGAGGGAAGUUGUGAAAGAA&CUC-GAUGCAACUUCUCUCACAUU	0	0	NA	1	27.2658	0.715654	0	27.2658	yes
PC-5p-1494_3633	TRINITY_DN117128_c0_g1	1032	1055	1045	-39.3	-29.1	0.740458	9.5	1-3,1055-1053;6-20,1049-1035	4-5,1052-1050[AILt];21-23,1034-1032[UP3]	...(((((((((((((((...(((&)))-..)))))))))))))))...	AAGGUGAGGGAAGUUGCAAAGGAG&CUC-GAUGCAACUUCUCUCACAUU	3	74.7496	0.037712	11	299.924	0.0936929	74.7496	299.924	yes
PC-5p-1494_3633	TRINITY_DN117488_c0_g1	1142	1165	1155	-39.3	-25.8	0.656489	10	1-3,1165-1163;5-7,1161-1159;9-23,1156-1142	4-4,1162-1162[SIL];8-8,1158-1157[AILt]	(((((((((((((((..(((.(((&))).)))-.)))))))))))))))	GAUGUGAGAGGGGUUUUUGUGGAG&CUCGAUG-CAACUUCUCUCACAUU	1	24.9165	0.841913	0	0	NA	24.9165	0	yes
PC-5p-1494_3633	TRINITY_DN118461_c1_g5	537	569	551	-39.3	-27.3	0.694656	23	1-9,569-561;10-10,551-551;11-20,549-540	x-x,560-552[BULt];x-x,550-550[BULt];21-23,539-537[UP3]	...((((((((((.(.........(((((((((&)))))))))---------)-))))))))))...	GGCGUGAGAGAAGCUGCUAUAUUAUGCAUCGAG&CUCGAUGCA---------A-CUUCUCUCACAUU	1	24.9165	0.452461	0	0	NA	24.9165	0	yes
PC-5p-1494_3633	TRINITY_DN121185_c0_g1	714	737	727	-39.3	-26.6	0.676845	6	1-5,737-733;6-13,731-724;16-23,721-714	x-x,732-732[BULt];14-15,723-722[SIL]	((((((((..((((((((.(((((&)))))-))))))))..))))))))	AAUGUGAGUAAAGUUGCGUUUGAG&CUCGA-UGCAACUUCUCUCACAUU	0	0	NA	8	218.126	0.0172853	0	218.126	yes
PC-5p-1494_3633	TRINITY_DN123231_c1_g2	408	431	421	-39.3	-27.2	0.692112	9.5	1-3,431-429;4-9,427-422;11-20,420-411	x-x,428-428[BULt];10-10,421-421[SIL];21-23,410-408[UP3]	...((((((((((.((((((.(((&)))-)))))).))))))))))...	CCGGUGAGGGAGGAUGUAUCUGAG&CUC-GAUGCAACUUCUCUCACAUU	1	24.9165	0.529002	4	109.063	0.325314	24.9165	109.063	yes
PC-5p-1494_3633	TRINITY_DN124836_c2_g1	1016	1044	1031	-39.3	-25.78	0.65598	13.5	1-8,1044-1037;10-14,1031-1027;15-23,1024-1016	9-9,1036-1032[AILt];x-x,1026-1025[BULt]	(((((((((..(((((.....((((((((&))))))))----.)))))--)))))))))	GAUGUGAGAAAGAAGUAGAUCGCAUUGAG&CUCGAUGC----AACUUC--UCUCACAUU	0	0	NA	1	27.2658	0.845911	0	27.2658	yes
PC-5p-1494_3633	TRINITY_DN125231_c1_g1	9466	9488	9479	-39.3	-28	0.712468	6.5	1-1,9488-9488;4-16,9485-9473;18-23,9471-9466	2-3,9487-9486[SIL];17-17,9472-9472[SIL]	((((((.(((((((((((((..(&)..))))))))))))).))))))	GAUGUGUGAGAAGUUGCAUUUUG&CUCGAUGCAACUUCUCUCACAUU	1	24.9165	0.287379	0	0	NA	24.9165	0	yes
PC-5p-1494_3633	TRINITY_DN99056_c2_g2	955	979	968	-39.3	-27.28	0.694148	11	1-3,979-977;6-9,972-969;11-23,967-955	4-5,976-973[AILt];10-10,968-968[SIL]	(((((((((((((.((((....(((&)))--..)))).)))))))))))))	GAUGUGGGAGAAGAUGCAAGAAGAG&CUC--GAUGCAACUUCUCUCACAUU	1	24.9165	0.47269	0	0	NA	24.9165	0	yes
PC-5p-158442_45	TRINITY_DN100731_c0_g2	2	28	17	-37.4	-24.4	0.652406	13	2-8,27-21;10-17,17-10;18-22,8-4	1-1,28-28[UP5];9-9,20-18[AILt];x-x,9-9[BULt];23-24,3-2[UP3]	..(((((.((((((((...(((((((.&.)))))))--.))))))))-)))))..	GUGAGGGUAGGGGAGGGUAAUGAGAUG&AAUUUCAU--AUCUCCCCU-CCUUUUA	2	49.8331	0.994279	0	0	NA	49.8331	0	yes
PC-5p-158442_45	TRINITY_DN102058_c0_g1	176	200	190	-37.4	-24.62	0.658289	15	2-7,199-194;11-19,189-181	1-1,200-200[UP5];8-10,193-190[AILt];20-24,180-176[UP3]	.....(((((((((....((((((.&.))))))-...))))))))).....	CAAGUGGAGGGGAGUGUUUGAGAUC&AAUUUCA-UAUCUCCCCUCCUUUUA	0	0	NA	1	27.2658	0.999359	0	27.2658	yes
PC-5p-158442_45	TRINITY_DN103575_c0_g1	911	936	926	-37.4	-25.9	0.692513	12.5	4-7,933-930;9-11,927-925;12-23,923-912	1-3,936-934[UP5];8-8,929-928[AILt];x-x,924-924[BULt];24-24,911-911[UP3]	.((((((((((((.(((..((((...&...))))-.)))-)))))))))))).	GAAGAGGAGGGGACGAUCUUGAACAA&AAUUUCA-UAUC-UCCCCUCCUUUUA	1	24.9165	0.975932	0	0	NA	24.9165	0	yes
PC-5p-158442_45	TRINITY_DN104655_c1_g1	560	585	576	-37.4	-25.4	0.679144	11.5	3-12,583-574;13-14,572-571;15-22,569-562	1-2,585-584[UP5];x-x,573-573[BULt];x-x,570-570[BULt];23-24,561-560[UP3]	..((((((((.((.((((((((((..&..))))))))))-))-))))))))..	GUGAAGGAGGUGGUGGAUAUGGAGGU&AAUUUCAUAUCU-CC-CCUCCUUUUA	0	0	NA	24	654.379	0.941179	0	654.379	yes
PC-5p-158442_45	TRINITY_DN104655_c1_g1	611	636	627	-37.4	-24.7	0.660428	13.5	5-12,632-625;13-14,623-622;15-23,620-612	1-4,636-633[UP5];x-x,624-624[BULt];x-x,621-621[BULt];24-24,611-611[UP3]	.(((((((((.((.((((((((....&....))))))))-))-))))))))).	GAGAAGGAGGUGGUGGAUAUGGUGGA&AAUUUCAUAUCU-CC-CCUCCUUUUA	0	0	NA	8	218.126	0.844147	0	218.126	yes
PC-5p-158442_45	TRINITY_DN104869_c3_g1	38	61	52	-37.4	-27.9	0.745989	12.5	5-8,57-54;10-22,52-40	1-4,61-58[UP5];9-9,53-53[SIL];23-24,39-38[UP3]	..(((((((((((((.((((....&....)))).)))))))))))))..	GUGAAGGAGGGGGGAAAUGAUGAG&AAUUUCAUAUCUCCCCUCCUUUUA	0	0	NA	3	81.7974	0.412122	0	81.7974	yes
PC-5p-158442_45	TRINITY_DN105076_c1_g2	208	236	222	-37.4	-24.4	0.652406	23	4-8,233-229;9-19,223-213	1-3,236-234[UP5];x-x,228-224[BULt];20-24,212-208[UP3]	.....(((((((((((.....(((((...&...)))))-----))))))))))).....	UUACCGGAGGGGAGGUUAUUAGUGAGGAA&AAUUUCAU-----AUCUCCCCUCCUUUUA	0	0	NA	1	27.2658	0.999748	0	27.2658	yes
PC-5p-158442_45	TRINITY_DN107673_c0_g1	915	937	929	-37.4	-25.7	0.687166	5.5	1-8,937-930;10-18,929-921;20-23,919-916	9-9,x-x[BULq];19-19,920-920[SIL];24-24,915-915[UP3]	.((((.(((((((((-((((((((&)))))))).))))))))).)))).	GAAGAAGAGGGGAGG-AUGAAAUU&AAUUUCAUAUCUCCCCUCCUUUUA	1	24.9165	0.986316	0	0	NA	24.9165	0	yes
PC-5p-158442_45	TRINITY_DN108790_c0_g1	158	189	181	-37.4	-24.9	0.665775	14	2-6,188-184;8-17,183-174;18-24,164-158	1-1,189-189[UP5];7-7,x-x[BULq];x-x,173-165[BULt]	(((((((.........((((((((((-(((((.&.))))).))))))))))---------)))))))	UAAGAGGGGUCGAGAAGGGGGAGAUA-GAGAUA&AAUUUCAUAUCUCCCCU---------CCUUUUA	3	74.7496	0.976864	0	0	NA	74.7496	0	yes
PC-5p-158442_45	TRINITY_DN109190_c0_g2	26	51	42	-37.4	-26.3	0.703209	11	3-12,49-40;13-14,38-37;15-23,35-27	1-2,51-50[UP5];x-x,39-39[BULt];x-x,36-36[BULt];24-24,26-26[UP3]	.(((((((((.((.((((((((((..&..))))))))))-))-))))))))).	GAGAGGGAGGUGGUGGAUAUGGAGGU&AAUUUCAUAUCU-CC-CCUCCUUUUA	0	0	NA	4	109.063	0.475197	0	109.063	yes
PC-5p-158442_45	TRINITY_DN109981_c3_g4	102	130	121	-37.4	-25.4	0.679144	11.5	3-15,128-116;16-16,114-114;17-23,109-103	1-2,130-129[UP5];x-x,115-115[BULt];x-x,113-110[BULt];24-24,102-102[UP3]	.(((((((....(.(((((((((((((..&..)))))))))))))-)----))))))).	GGAAAGGAAAAAGUGGGAGAUAUGGAGGC&AAUUUCAUAUCUCCC-C----UCCUUUUA	0	0	NA	2	54.5316	0.685098	0	54.5316	yes
PC-5p-158442_45	TRINITY_DN109983_c3_g4	455	484	468	-37.4	-25	0.668449	20.5	2-8,483-477;9-11,469-467;13-23,466-456	1-1,484-484[UP5];x-x,476-470[BULt];12-12,x-x[BULq];24-24,455-455[UP3]	.(((((((((((-(((.......(((((((.&.)))))))-------))).))))))))))).	GAAGAGGAGGGG-GAUGAGUUGAAUGAGGUG&AAUUUCAU-------AUCUCCCCUCCUUUUA	2	49.8331	0.972239	0	0	NA	49.8331	0	yes
PC-5p-158442_45	TRINITY_DN110556_c0_g2	617	642	633	-37.4	-26.5	0.708556	8	2-6,641-637;8-13,635-630;14-18,628-624;19-24,622-617	1-1,642-642[UP5];7-7,636-636[SIL];x-x,629-629[BULt];x-x,623-623[BULt]	((((((.(((((.((((((.(((((.&.))))).))))))-)))))-))))))	UGAAGGAGAGGGAGAGAUGCGAGAUG&AAUUUCAUAUCUC-CCCUC-CUUUUA	0	0	NA	6	163.595	0.0406379	0	163.595	yes
PC-5p-158442_45	TRINITY_DN110949_c0_g1	1340	1363	1355	-37.4	-25	0.668449	9.5	1-7,1363-1357;10-18,1355-1347;19-22,1345-1342	8-9,1356-1356[AILq];x-x,1346-1346[BULt];23-24,1341-1340[UP3]	..((((.(((((((((.-(((((((&)))))))..)))))))))-))))..	AUGAAGAGAGGGGAGAC-UGGGAUU&AAUUUCAUAUCUCCCCUC-CUUUUA	0	0	NA	4	109.063	0.970457	0	109.063	yes
PC-5p-158442_45	TRINITY_DN111952_c1_g3	959	982	973	-37.4	-26.5	0.708556	8	2-10,981-973;12-16,971-967;18-23,965-960	1-1,982-982[UP5];11-11,972-972[SIL];17-17,966-966[SIL];24-24,959-959[UP3]	.((((((.(((((.(((((((((.&.))))))))).))))).)))))).	CGGAAGGUGGGGAAGUAUGAAGUA&AAUUUCAUAUCUCCCCUCCUUUUA	0	0	NA	1	27.2658	0.877046	0	27.2658	yes
PC-5p-158442_45	TRINITY_DN112824_c0_g1	1060	1084	1075	-37.4	-25.7	0.687166	9.5	3-5,1082-1080;7-13,1078-1072;14-23,1070-1061	1-2,1084-1083[UP5];6-6,1079-1079[SIL];x-x,1071-1071[BULt];24-24,1060-1060[UP3]	.((((((((((.(((((((.(((..&..))).)))))))-)))))))))).	AAAGAGGAGGGAGAGAUGUCAGACA&AAUUUCAUAUCUC-CCCUCCUUUUA	0	0	NA	2	54.5316	0.608509	0	54.5316	yes
PC-5p-158442_45	TRINITY_DN113018_c1_g1	683	706	697	-37.4	-25.2	0.673797	12.5	4-12,703-695;14-21,693-686	1-3,706-704[UP5];13-13,694-694[SIL];22-24,685-683[UP3]	...((((((((.(((((((((...&...))))))))).))))))))...	GGUAGGGAGGGAGGAUGUGGAGAG&AAUUUCAUAUCUCCCCUCCUUUUA	0	0	NA	1	27.2658	0.993463	0	27.2658	yes
PC-5p-158442_45	TRINITY_DN113102_c1_g1	760	782	774	-37.4	-27	0.721925	7.5	2-7,781-776;9-16,775-768;18-23,766-761	1-1,782-782[UP5];8-8,x-x[BULq];17-17,767-767[SIL];24-24,760-760[UP3]	.((((((.((((((((-((((((.&.)))))).)))))))).)))))).	AGAAAGGUGGGGAGAU-UGGGAUA&AAUUUCAUAUCUCCCCUCCUUUUA	1	24.9165	0.847753	0	0	NA	24.9165	0	yes
PC-5p-158442_45	TRINITY_DN113699_c7_g1	269	293	284	-37.4	-25.3	0.676471	14.5	6-17,288-277;18-22,275-271	1-5,293-289[UP5];x-x,276-276[BULt];23-24,270-269[UP3]	..(((((.((((((((((((.....&.....))))))))))))-)))))..	GCGGAGGUGGGGGAGGUAUGCCCGG&AAUUUCAUAUCUCCCCU-CCUUUUA	0	0	NA	1	27.2658	0.992563	0	27.2658	yes
PC-5p-158442_45	TRINITY_DN114007_c0_g1	1008	1031	1022	-37.4	-24.8	0.663102	13	2-10,1030-1022;12-19,1020-1013	1-1,1031-1031[UP5];11-11,1021-1021[SIL];20-24,1012-1008[UP3]	.....((((((((.(((((((((.&.))))))))).)))))))).....	CACGUGGAGGGGGAGUAUGGGGUG&AAUUUCAUAUCUCCCCUCCUUUUA	1	24.9165	0.999502	0	0	NA	24.9165	0	yes
PC-5p-158442_45	TRINITY_DN115014_c0_g1	1102	1125	1117	-37.4	-25.2	0.673797	10	2-8,1124-1118;11-18,1116-1109;19-23,1107-1103	1-1,1125-1125[UP5];9-10,1117-1117[AILq];x-x,1108-1108[BULt];24-24,1102-1102[UP3]	.(((((.((((((((.-(((((((.&.)))))))..))))))))-))))).	GAAAAGUGAGGGGAGC-GUGGAGUC&AAUUUCAUAUCUCCCCUC-CUUUUA	0	0	NA	3	81.7974	0.956212	0	81.7974	yes
PC-5p-158442_45	TRINITY_DN117363_c0_g1	442	470	461	-37.4	-25.5	0.681818	12.5	3-10,468-461;11-16,459-454;17-23,449-443	1-2,470-469[UP5];x-x,460-460[BULt];x-x,453-450[BULt];24-24,442-442[UP3]	.(((((((....((((((.((((((((..&..))))))))-))))))----))))))).	AAGAAGGACGUUGGGGAGUAUGUGAAGGA&AAUUUCAUAU-CUCCCC----UCCUUUUA	0	0	NA	1	27.2658	0.986276	0	27.2658	yes
PC-5p-158442_45	TRINITY_DN117455_c5_g6	180	203	195	-37.4	-26.7	0.713904	8.5	3-9,201-195;11-13,194-192;14-23,190-181	1-2,203-202[UP5];10-10,x-x[BULq];x-x,191-191[BULt];24-24,180-180[UP3]	.((((((((((.(((-(((((((..&..))))))).)))-)))))))))).	GAAGAGGAGGGUGAG-UAUGAAGGU&AAUUUCAUAUCUC-CCCUCCUUUUA	0	0	NA	1	27.2658	0.8508	0	27.2658	yes
PC-5p-158442_45	TRINITY_DN118739_c1_g1	1689	1714	1704	-37.4	-27	0.721925	11	1-8,1714-1707;11-14,1703-1700;15-23,1698-1690	9-10,1706-1704[AILt];x-x,1699-1699[BULt];24-24,1689-1689[UP3]	.(((((((((.((((...((((((((&))))))))-..))))-))))))))).	GAGAGGGAGGAGGAGUUGGUGAAGUU&AAUUUCAU-AUCUCC-CCUCCUUUUA	0	0	NA	4	109.063	0.640529	0	109.063	yes
PC-5p-158442_45	TRINITY_DN119693_c0_g3	381	405	396	-37.4	-24.6	0.657754	13.5	3-7,403-399;10-14,396-392;15-22,390-383	1-2,405-404[UP5];8-9,398-397[SIL];x-x,391-391[BULt];23-24,382-381[UP3]	..((((((((.(((((..(((((..&..)))))..)))))-))))))))..	CUGAAGGAGGAGGAGGGUUGAGGCC&AAUUUCAUAUCUCC-CCUCCUUUUA	1	24.9165	0.999833	0	0	NA	24.9165	0	yes
PC-5p-158442_45	TRINITY_DN119795_c1_g1	26	49	40	-37.4	-25.4	0.679144	8.5	2-8,48-42;11-13,39-37;15-23,35-27	1-1,49-49[UP5];9-10,41-40[SIL];14-14,36-36[SIL];24-24,26-26[UP3]	.(((((((((.(((..(((((((.&.)))))))..))).))))))))).	GAAGAGGAGGUGAGUGAUGAGAUG&AAUUUCAUAUCUCCCCUCCUUUUA	1	24.9165	0.994858	2	54.5316	0.936363	24.9165	54.5316	yes
PC-5p-158442_45	TRINITY_DN120724_c1_g1	282	306	297	-37.4	-27	0.721925	11.5	3-8,304-299;10-15,297-292;16-23,290-283	1-2,306-305[UP5];9-9,298-298[SIL];x-x,291-291[BULt];24-24,282-282[UP3]	.((((((((.((((((.((((((..&..)))))).))))))-)))))))).	GGAGAGGGGAGGGAGGAGUGAGAAG&AAUUUCAUAUCUCCC-CUCCUUUUA	1	24.9165	0.829551	0	0	NA	24.9165	0	yes
PC-5p-158442_45	TRINITY_DN120882_c0_g2	935	965	956	-37.4	-25.8	0.68984	20	2-10,964-956;11-20,949-940;21-24,938-935	1-1,965-965[UP5];x-x,955-950[BULt];x-x,939-939[BULt]	((((.((((((((((......(((((((((.&.)))))))))------))))))))))-))))	UGAAUGGGAGGGGGGUUGGGAGUGUGGAGUG&AAUUUCAUAU------CUCCCCUCCU-UUUA	2	49.8331	0.887739	2	54.5316	0.88056	49.8331	54.5316	yes
PC-5p-158442_45	TRINITY_DN121500_c0_g2	473	499	490	-37.4	-24.9	0.665775	19.5	5-11,495-489;12-21,485-476	1-4,499-496[UP5];x-x,488-486[BULt];22-24,475-473[UP3]	...((((((((((...(((((((....&....)))))))---))))))))))...	UUUGAGGAGGGGGUGUGGUGUGAUGAC&AAUUUCAUAUC---UCCCCUCCUUUUA	0	0	NA	1	27.2658	0.997952	0	27.2658	yes
PC-5p-158442_45	TRINITY_DN123499_c2_g1	328	354	342	-37.4	-25.9	0.692513	14	2-6,353-349;7-19,345-333	1-1,354-354[UP5];x-x,348-346[BULt];20-24,332-328[UP3]	.....(((((((((((((...(((((.&.)))))---))))))))))))).....	CUAUUGGAGGGGGGAUAUUGGGGAAUA&AAUUUC---AUAUCUCCCCUCCUUUUA	1	24.9165	0.977677	0	0	NA	24.9165	0	yes
PC-5p-158442_45	TRINITY_DN125109_c5_g2	18	46	37	-37.4	-27.8	0.743316	12	2-10,45-37;11-15,32-28;16-24,26-18	1-1,46-46[UP5];x-x,36-33[BULt];x-x,27-27[BULt]	(((((((((.(((((....(((((((((.&.)))))))))----)))))-)))))))))	UAAAAGGAGUGGGAGGUCGGUAUGGAAUG&AAUUUCAUAU----CUCCC-CUCCUUUUA	0	0	NA	1	27.2658	0.594594	0	27.2658	yes
PC-5p-158442_45	TRINITY_DN87136_c0_g1	943	967	958	-37.4	-25.2	0.673797	10.5	2-4,966-964;6-18,962-950;19-20,948-947	1-1,967-967[UP5];5-5,963-963[SIL];x-x,949-949[BULt];21-24,946-943[UP3]	....((.(((((((((((((.(((.&.))).)))))))))))))-))....	GUCCAGUGGGGGGAGGUAUGUGAUA&AAUUUCAUAUCUCCCCUC-CUUUUA	0	0	NA	1	27.2658	0.993249	0	27.2658	yes
PC-5p-158442_45	TRINITY_DN91073_c0_g1	643	667	658	-37.4	-24.7	0.660428	17	8-14,660-654;15-23,652-644	1-7,667-661[UP5];x-x,653-653[BULt];24-24,643-643[UP3]	.(((((((((.(((((((.......&.......)))))))-))))))))).	GGAGAGGAGGUGGAGGUAGGUCAAG&AAUUUCAUAUCUCC-CCUCCUUUUA	0	0	NA	3	81.7974	0.985451	0	81.7974	yes
PC-5p-158442_45	TRINITY_DN97291_c7_g1	678	707	694	-37.4	-24.8	0.663102	15	1-9,707-699;10-14,694-690;15-23,687-679	x-x,698-695[BULt];x-x,689-688[BULt];24-24,678-678[UP3]	.(((((((((..(((((....(((((((((&)))))))))----)))))--))))))))).	GAAAAGGAGGGCGGAGGCGAUUGUGGAGUU&AAUUUCAUA----UCUCC--CCUCCUUUUA	0	0	NA	1	27.2658	0.998313	0	27.2658	yes
PC-5p-158442_45	TRINITY_DN98187_c0_g1	2207	2232	2222	-37.4	-26.9	0.719251	10	4-8,2229-2225;9-18,2223-2214;19-24,2212-2207	1-3,2232-2230[UP5];x-x,2224-2224[BULt];x-x,2213-2213[BULt]	((((((.((((((((((.(((((...&...)))))-))))))))))-))))))	UGAAAGAGGGGGGAGAUGAUGGACAA&AAUUUCAU-AUCUCCCCUC-CUUUUA	0	0	NA	2	54.5316	0.374308	0	54.5316	yes
PC-5p-158442_45	TRINITY_DN99890_c0_g4	865	888	879	-37.4	-25.6	0.684492	13	2-6,887-883;9-19,880-870	1-1,888-888[UP5];7-8,882-881[SIL];20-24,869-865[UP3]	.....(((((((((((..(((((.&.)))))..))))))))))).....	GGGGUGGAGGGGGGAUUAGGAGUG&AAUUUCAUAUCUCCCCUCCUUUUA	1	24.9165	0.990956	3	81.7974	0.648886	24.9165	81.7974	yes
PC-5p-158442_45	TRINITY_DN99918_c1_g2	414	438	429	-37.4	-27	0.721925	11.5	3-8,436-431;10-13,429-426;14-23,424-415	1-2,438-437[UP5];9-9,430-430[SIL];x-x,425-425[BULt];24-24,414-414[UP3]	.((((((((((.((((.((((((..&..)))))).))))-)))))))))).	AGAGGGGAGGGCGAGGCGUGAGAGG&AAUUUCAUAUCUC-CCCUCCUUUUA	1	24.9165	0.869036	0	0	NA	24.9165	0	yes
PC-5p-165218_42	TRINITY_DN109927_c0_g1	1186	1213	1202	-35.2	-24.7	0.701705	11	3-9,1211-1205;10-19,1202-1193;20-24,1190-1186	1-2,1213-1212[UP5];x-x,1204-1203[BULt];x-x,1192-1191[BULt]	(((((..((((((((((..(((((((..&..)))))))--))))))))))--)))))	GGUUUGGUGGUGGGUAUCGGUAUGCAUC&AUUGCAUAU--AUACCCACUA--AAACU	0	0	NA	1	27.2658	0.34242	0	27.2658	yes
PC-5p-165218_42	TRINITY_DN110138_c0_g1	471	493	485	-35.2	-25.2	0.715909	11.5	2-7,492-487;13-24,482-471	1-1,493-493[UP5];8-12,486-483[AILq]	((((((((((((....-((((((.&.)))))).....))))))))))))	GGUUUUAGUGGGGAGG-AUGCAAG&AUUGCAUAUAUACCCACUAAAACU	0	0	NA	1	27.2658	0.251891	0	27.2658	yes
PC-5p-165218_42	TRINITY_DN114359_c1_g2	113	137	127	-35.2	-24.4	0.693182	12	3-6,135-132;9-19,128-118;22-24,115-113	1-2,137-136[UP5];7-8,131-129[AILt];20-21,117-116[SIL]	(((..(((((((((((...((((..&..))))-..)))))))))))..)))	GGUGGUGGUGGGUAUAGUUUGCAGA&AUUGCA-UAUAUACCCACUAAAACU	3	74.7496	0.115748	0	0	NA	74.7496	0	yes
PC-5p-165218_42	TRINITY_DN79832_c0_g1	13	36	27	-35.2	-23.9	0.678977	16	8-24,29-13	1-7,36-30[UP5]	(((((((((((((((((.......&.......)))))))))))))))))	GGUUUUGGUGGGUGUGUUUCUUUA&AUUGCAUAUAUACCCACUAAAACU	0	0	NA	1	27.2658	0.440334	0	27.2658	yes
PC-5p-165218_42	TRINITY_DN94940_c0_g2	540	562	553	-35.2	-23	0.653409	12.5	4-7,559-556;10-11,553-552;13-24,551-540	1-3,562-560[UP5];8-9,555-554[SIL];12-12,x-x[BULq]	((((((((((((-((..((((...&...))))..)).))))))))))))	GGUUUUAGUGGG-AUUGGUGCUUU&AUUGCAUAUAUACCCACUAAAACU	2	49.8331	0.259066	8	218.126	0.278594	49.8331	218.126	yes
PC-5p-188919_35	TRINITY_DN109995_c2_g3	22	44	35	-36.8	-24.3	0.660326	13	6-17,39-28;21-24,25-22	1-5,44-40[UP5];18-20,27-26[AILq]	((((..-((((((((((((.....&.....))))))))))))...))))	GAGUGU-GUCCAAUGGCUCGAGUC&AUUAUGAGCCAUUGGAUUUGAUUC	1	24.9165	0.962188	0	0	NA	24.9165	0	yes
PC-5p-188919_35	TRINITY_DN114848_c3_g2	529	556	546	-36.8	-24.9	0.67663	10	2-6,555-551;7-11,549-545;13-17,543-539;18-24,535-529	1-1,556-556[UP5];x-x,550-550[BULt];12-12,544-544[SIL];x-x,538-536[BULt]	(((((((...(((((.(((((.(((((.&.)))))-))))).)))))---)))))))	GAGUCAAAUUAUCCGUUGGCUGCAUGAA&AUUAUG-AGCCAUUGGAU---UUGAUUC	0	0	NA	2	54.5316	0.358392	0	54.5316	yes
PC-5p-188919_35	TRINITY_DN117166_c1_g1	1391	1414	1405	-36.8	-24.4	0.663043	10	1-5,1414-1410;7-10,1408-1405;12-14,1403-1401;16-24,1399-1391	6-6,1409-1409[SIL];11-11,1404-1404[SIL];15-15,1400-1400[SIL]	(((((((((.(((.((((.(((((&))))).)))).))).)))))))))	GGGUCAGGUGCAGAGGCUGAUGGU&AUUAUGAGCCAUUGGAUUUGAUUC	2	49.8331	0.798043	1	27.2658	0.921713	49.8331	27.2658	yes
PC-5p-188919_35	TRINITY_DN118401_c0_g2	348	371	362	-36.8	-32.2	0.875	5	3-10,369-362;12-24,360-348	1-2,371-370[UP5];11-11,361-361[SIL]	(((((((((((((.((((((((..&..)))))))).)))))))))))))	GAAUCAAAUCCAAAGGCUCAUAUU&AUUAUGAGCCAUUGGAUUUGAUUC	0	0	NA	1	27.2658	0.0922041	0	27.2658	yes
PC-5p-188919_35	TRINITY_DN119132_c0_g3	304	327	318	-36.8	-24	0.652174	10.5	5-15,323-313;18-21,310-307;23-24,305-304	1-4,327-324[UP5];16-17,312-311[SIL];22-22,306-306[SIL]	((.((((..(((((((((((....&....)))))))))))..)))).))	GGCUCAAGGCCAAUGGCUCACAGA&AUUAUGAGCCAUUGGAUUUGAUUC	0	0	NA	2	54.5316	0.621404	0	54.5316	yes
PC-5p-188919_35	TRINITY_DN123151_c1_g1	1443	1466	1457	-36.8	-31	0.842391	3	1-3,1466-1464;5-24,1462-1443	4-4,1463-1463[SIL]	((((((((((((((((((((.(((&))).))))))))))))))))))))	GGAUCAAAUCUAAUGGCUCACAAU&AUUAUGAGCCAUUGGAUUUGAUUC	2	49.8331	0.037712	0	0	NA	49.8331	0	yes
PC-5p-188919_35	TRINITY_DN89837_c0_g2	659	682	673	-36.8	-26.4	0.717391	7	2-19,681-664;21-23,662-660	1-1,682-682[UP5];20-20,663-663[SIL];24-24,659-659[UP3]	.(((.((((((((((((((((((.&.)))))))))))))))))).))).	AAGUGAAGUCUGAUGGCUCAUGGC&AUUAUGAGCCAUUGGAUUUGAUUC	1	24.9165	0.510933	1	27.2658	0.458092	24.9165	27.2658	yes
PC-5p-188919_35	TRINITY_DN93324_c3_g1	90	113	104	-36.8	-24.5	0.665761	15	8-22,106-92	1-7,113-107[UP5];23-24,91-90[UP3]	..(((((((((((((((.......&.......)))))))))))))))..	UUAUCAAAUCCAAUGGCAGCAGUC&AUUAUGAGCCAUUGGAUUUGAUUC	4	99.6661	0.433872	1	27.2658	0.908017	99.6661	27.2658	yes
PC-5p-188919_35	TRINITY_DN99899_c0_g1	615	640	629	-36.8	-24.1	0.654891	10.5	4-6,637-635;7-8,633-632;9-17,630-622;19-24,620-615	1-3,640-638[UP5];x-x,634-634[BULt];x-x,631-631[BULt];18-18,621-621[SIL]	((((((.(((((((((.((.(((...&...)))-))-))))))))).))))))	GAAUCAUGUCCAAUGGACUGCAUCCA&AUUAUG-AG-CCAUUGGAUUUGAUUC	0	0	NA	1	27.2658	0.963893	0	27.2658	yes
PC-5p-214265_29	TRINITY_DN105043_c0_g1	755	776	767	-31.1	-21.8	0.700965	4.5	2-9,775-768;11-16,766-761;17-21,759-755	1-1,776-776[UP5];10-10,767-767[SIL];x-x,760-760[BULt]	(((((.((((((.((((((((.&.)))))))).))))))-)))))	AAGAUGGUGAGUAUGCAAAUCG&UGAUUUGCACACUCAC-AUUUU	0	0	NA	1	27.2658	0.8508	0	27.2658	yes
PC-5p-214265_29	TRINITY_DN112596_c0_g2	1089	1110	1100	-31.1	-24.4	0.784566	8	1-9,1110-1102;10-17,1100-1093	x-x,1101-1101[BULt];18-21,1092-1089[UP3]	....((((((((.(((((((((&)))))))))-))))))))....	AGGUUGUGAGUGCUGCGGAUCA&UGAUUUGCA-CACUCACAUUUU	1	24.9165	0.313707	0	0	NA	24.9165	0	yes
PC-5p-214265_29	TRINITY_DN113353_c1_g1	1403	1423	1414	-31.1	-20.6	0.662379	10	2-14,1422-1410	1-1,1423-1423[UP5];15-21,1409-1403[UP3]	.......(((((((((((((.&.))))))))))))).......	AAAGACCGAGUGUGCAGAUUG&UGAUUUGCACACUCACAUUUU	2	49.8331	0.966008	1	27.2658	0.995415	49.8331	27.2658	yes
PC-5p-214265_29	TRINITY_DN113457_c0_g1	17	36	27	-31.1	-21.1	0.678457	9.5	4-10,33-27;12-21,26-17	1-3,36-34[UP5];11-11,x-x[BULq]	((((((((((-(((((((...&...))))))).))))))))))	GAGAUGUGGG-GUGCAAGGGU&UGAUUUGCACACUCACAUUUU	1	24.9165	0.981507	0	0	NA	24.9165	0	yes
PC-5p-214265_29	TRINITY_DN117437_c2_g3	248	271	259	-31.1	-20.8	0.66881	12	2-8,270-264;9-19,260-250	1-1,271-271[UP5];x-x,263-261[BULt];20-21,249-248[UP3]	..(((((((((((...(((((((.&.)))))))---)))))))))))..	UUAGUGUGGGUGUAAAGUAGAUCU&UGAUUUGC---ACACUCACAUUUU	2	49.8331	0.659167	0	0	NA	49.8331	0	yes
PC-5p-214265_29	TRINITY_DN117885_c0_g1	469	493	484	-31.1	-20.3	0.652733	15	3-12,491-482;13-21,477-469	1-2,493-492[UP5];x-x,481-478[BULt]	(((((((((....((((((((((..&..))))))))))----)))))))))	AGAAUGUGGUGUCGUGUGCGGGUGU&UGAUUUGCACAC----UCACAUUUU	0	0	NA	1	27.2658	0.998778	0	27.2658	yes
PC-5p-214265_29	TRINITY_DN119449_c0_g1	3122	3145	3133	-31.1	-20.44	0.657235	14	1-8,3145-3138;10-17,3133-3126	9-9,3137-3134[AILt];18-21,3125-3122[UP3]	....((((((((....((((((((&))))))))---.))))))))....	GCAUUGUGAGUGAUAGGCAGGUCA&UGAUUUGC---ACACUCACAUUUU	0	0	NA	4	109.063	0.971597	0	109.063	yes
PC-5p-214265_29	TRINITY_DN119949_c0_g1	832	852	843	-31.1	-21.6	0.694534	8.5	1-1,852-852;3-4,850-849;6-6,847-847;8-21,845-832	2-2,851-851[SIL];5-5,848-848[SIL];7-7,846-846[SIL]	((((((((((((((.(.((.(&).)).).))))))))))))))	GGAGUGUGAGUGUGGAUGUGA&UGAUUUGCACACUCACAUUUU	2	49.8331	0.762528	0	0	NA	49.8331	0	yes
PC-5p-214265_29	TRINITY_DN120759_c2_g1	54	74	65	-31.1	-23	0.73955	12	6-19,69-56	1-5,74-70[UP5];20-21,55-54[UP3]	..((((((((((((((.....&.....))))))))))))))..	AUGGUGUGAGUGUGCACGAUG&UGAUUUGCACACUCACAUUUU	7	174.416	0.409321	8	218.126	0.400441	174.416	218.126	yes
PC-5p-214265_29	TRINITY_DN123231_c1_g2	280	300	291	-31.1	-21.4	0.688103	9.5	1-4,300-297;6-18,295-283	5-5,296-296[SIL];19-21,282-280[UP3]	...(((((((((((((.((((&)))).)))))))))))))...	AGUGUGUGAGUGUGUGUGUUA&UGAUUUGCACACUCACAUUUU	1	24.9165	0.94279	0	0	NA	24.9165	0	yes
PC-5p-214265_29	TRINITY_DN124796_c3_g1	1084	1104	1096	-31.1	-21.6	0.694534	6	2-8,1103-1097;10-15,1096-1091;16-21,1089-1084	1-1,1104-1104[UP5];9-9,x-x[BULq];x-x,1090-1090[BULt]	((((((.((((((-(((((((.&.))))))).))))))-))))))	GGGAUGAUGGGUG-GCAAAUCG&UGAUUUGCACACUCA-CAUUUU	1	24.9165	0.919719	1	27.2658	0.884725	24.9165	27.2658	yes
PC-5p-214265_29	TRINITY_DN98700_c0_g1	642	662	653	-31.1	-20.3	0.652733	9	3-15,660-648	1-2,662-661[UP5];16-21,647-642[UP3]	......(((((((((((((..&..)))))))))))))......	UACAUUUGAGUGUGCAAAUAA&UGAUUUGCACACUCACAUUUU	0	0	NA	1	27.2658	0.998418	0	27.2658	yes
PC-5p-2444_2353	TRINITY_DN101709_c0_g3	180	201	192	-32.1	-21.1	0.657321	13.5	6-16,196-186;17-20,184-181	1-5,201-197[UP5];x-x,185-185[BULt];21-21,180-180[UP3]	.((((.(((((((((((.....&.....)))))))))))-)))).	CGUGCUGUUGGGUCUCUAUGGU&UAAAAGGAGACCUAAU-GCAUA	0	0	NA	2	54.5316	0.8602	0	54.5316	yes
PC-5p-2444_2353	TRINITY_DN105133_c0_g1	1148	1170	1161	-32.1	-21.1	0.657321	9.5	1-12,1170-1159;13-18,1156-1151	x-x,1158-1157[BULt];19-21,1150-1148[UP3]	...((((((..((((((((((((&))))))))))))--))))))...	GUAGCGUUGUUGGUCUCUUUUUG&UAAAAGGAGACC--UAAUGCAUA	1	24.9165	0.980061	0	0	NA	24.9165	0	yes
PC-5p-2444_2353	TRINITY_DN108448_c1_g1	1110	1130	1121	-32.1	-26.6	0.82866	8	4-20,1127-1111	1-3,1130-1128[UP5];21-21,1110-1110[UP3]	.(((((((((((((((((...&...))))))))))))))))).	CGUGCAUUGGGUUUCCUUCAG&UAAAAGGAGACCUAAUGCAUA	1	24.9165	0.106791	1	27.2658	0.0922041	24.9165	27.2658	yes
PC-5p-2444_2353	TRINITY_DN113102_c1_g1	607	627	618	-32.1	-21.5	0.669782	13	5-7,623-621;9-18,619-610	1-4,627-624[UP5];8-8,620-620[SIL];19-21,609-607[UP3]	...((((((((((.(((....&....))).))))))))))...	ACGGCGUUGGGUCGCCUGAUU&UAAAAGGAGACCUAAUGCAUA	0	0	NA	1	27.2658	0.901889	0	27.2658	yes
PC-5p-2444_2353	TRINITY_DN114673_c1_g1	1702	1724	1715	-32.1	-22.1	0.688474	10.5	5-13,1720-1712;14-21,1709-1702	1-4,1724-1721[UP5];x-x,1711-1710[BULt]	((((((((..(((((((((....&....)))))))))--))))))))	UGUGCAUUCAAGGUUUCCUAACA&UAAAAGGAGACCU--AAUGCAUA	2	49.8331	0.55513	0	0	NA	49.8331	0	yes
PC-5p-2444_2353	TRINITY_DN120126_c0_g3	447	469	460	-32.1	-20.88	0.650467	14.5	6-13,464-457;16-20,452-448	1-5,469-465[UP5];14-15,456-453[AILt];21-21,447-447[UP3]	.(((((....((((((((.....&.....))))))))--..))))).	GAUGCGGAUGAGGUCUCCAUGGC&UAAAAGGAGACCU--AAUGCAUA	0	0	NA	1	27.2658	0.980433	0	27.2658	yes
PC-5p-2444_2353	TRINITY_DN120772_c0_g3	359	381	372	-32.1	-20.98	0.653583	11	4-13,378-369;16-20,364-360	1-3,381-379[UP5];14-15,368-365[AILt];21-21,359-359[UP3]	.(((((....((((((((((...&...))))))))))--..))))).	GAUGCAGAUGAGGUCUCUUUGGC&UAAAAGGAGACCU--AAUGCAUA	1	24.9165	0.985246	0	0	NA	24.9165	0	yes
PC-5p-2444_2353	TRINITY_DN121789_c0_g1	237	257	248	-32.1	-20.9	0.65109	11	4-6,254-252;8-18,250-240	1-3,257-255[UP5];7-7,251-251[SIL];19-21,239-237[UP3]	...(((((((((((.(((...&...))).)))))))))))...	GUCGUAUUGGGUCUGCUUAUG&UAAAAGGAGACCUAAUGCAUA	3	74.7496	0.911956	0	0	NA	74.7496	0	yes
PC-5p-2444_2353	TRINITY_DN123112_c1_g2	861	881	872	-32.1	-25.4	0.791277	3	2-11,880-871;13-21,869-861	1-1,881-881[UP5];12-12,870-870[SIL]	(((((((((.((((((((((.&.)))))))))).)))))))))	UAUGCAUUAUGUCUCCUUUUU&UAAAAGGAGACCUAAUGCAUA	1	24.9165	0.202178	0	0	NA	24.9165	0	yes
PC-5p-2444_2353	TRINITY_DN124655_c4_g4	61	81	72	-32.1	-21.4	0.666667	13	6-13,76-69;15-18,67-64	1-5,81-77[UP5];14-14,68-68[SIL];19-21,63-61[UP3]	...((((.((((((((.....&.....)))))))).))))...	ACCGCAUCAGGUCUCCAAGGU&UAAAAGGAGACCUAAUGCAUA	2	49.8331	0.455222	2	54.5316	0.483913	49.8331	54.5316	yes
PC-5p-2444_2353	TRINITY_DN90708_c3_g1	922	942	933	-32.1	-21.7	0.676012	12	5-13,938-930;16-18,927-925	1-4,942-939[UP5];14-15,929-928[SIL];19-21,924-922[UP3]	...(((..(((((((((....&....)))))))))..)))...	AAGGCAGAAGGUCUCCUAAGC&UAAAAGGAGACCUAAUGCAUA	0	0	NA	1	27.2658	0.8508	0	27.2658	yes
PC-5p-2444_2353	TRINITY_DN90809_c2_g1	1254	1274	1265	-32.1	-21.5	0.669782	9	4-13,1271-1262;16-21,1259-1254	1-3,1274-1272[UP5];14-15,1261-1260[SIL]	((((((..((((((((((...&...))))))))))..))))))	UGUGCGGAAGGUCUUCUUAAU&UAAAAGGAGACCUAAUGCAUA	1	24.9165	0.938316	0	0	NA	24.9165	0	yes
PC-5p-2444_2353	TRINITY_DN91124_c1_g1	183	203	194	-32.1	-21.4	0.666667	13	6-13,198-191;15-18,189-186	1-5,203-199[UP5];14-14,190-190[SIL];19-21,185-183[UP3]	...((((.((((((((.....&.....)))))))).))))...	ACCGCAUCAGGUCUCCAAGGU&UAAAAGGAGACCUAAUGCAUA	3	74.7496	0.793912	1	27.2658	0.919148	74.7496	27.2658	yes
PC-5p-244_20103	TRINITY_DN104770_c2_g1	1875	1901	1893	-35.1	-23	0.655271	19	1-2,1901-1900;5-10,1898-1893;11-21,1885-1875	3-4,1899-1899[AILq];x-x,1892-1886[BULt]	(((((((((((.......((((((.-((&))..))))))-------)))))))))))	GAUGGCGGCACAUCAGCCUGUGUUG-GA&UCAAAACACA-------GUGUUGCCAUC	0	0	NA	1	27.2658	0.916498	0	27.2658	yes
PC-5p-244_20103	TRINITY_DN109710_c1_g1	593	613	604	-35.1	-26.2	0.746439	4	1-5,613-609;7-13,607-601;15-21,599-593	6-6,608-608[SIL];14-14,600-600[SIL]	(((((((.(((((((.(((((&))))).))))))).)))))))	GAUGGCAUCAUUGUGCUUUGA&UCAAAACACAGUGUUGCCAUC	6	149.499	0.045082	4	109.063	0.0489978	149.499	109.063	yes
PC-5p-244_20103	TRINITY_DN117816_c1_g1	494	520	511	-35.1	-23.1	0.65812	20	5-10,516-511;11-21,504-494	1-4,520-517[UP5];x-x,510-505[BULt]	(((((((((((......((((((....&....))))))------)))))))))))	GGUGGCAGCACCUACUCUGUGUUGGCG&UCAAAACACA------GUGUUGCCAUC	1	24.9165	0.919719	6	163.595	0.732397	24.9165	163.595	yes
PC-5p-244_20103	TRINITY_DN118498_c1_g4	12	32	23	-35.1	-24.7	0.703704	14	8-21,25-12	1-7,32-26[UP5]	((((((((((((((.......&.......))))))))))))))	GGUGGCAGCACUGUUAAAAUC&UCAAAACACAGUGUUGCCAUC	2	49.8331	0.276742	1	27.2658	0.403051	49.8331	27.2658	yes
PC-5p-244_20103	TRINITY_DN120833_c0_g2	177	201	191	-35.1	-23.1	0.65812	7	2-4,200-198;5-17,196-184;18-21,180-177	1-1,201-201[UP5];x-x,197-197[BULt];x-x,183-181[BULt]	((((...(((((((((((((.(((.&.)))-)))))))))))))---))))	GAUGUGAGCAACAUUGUGUUAUUGG&UCAA-AACACAGUGUUGC---CAUC	0	0	NA	2	54.5316	0.721657	0	54.5316	yes
PC-5p-244_20103	TRINITY_DN122323_c2_g1	161	185	172	-35.1	-24.3	0.692308	11	1-7,185-179;8-12,174-170;14-21,168-161	x-x,178-175[BULt];13-13,169-169[SIL]	((((((((.(((((....(((((((&)))))))----))))).))))))))	GAUGGUGAGGCUGUGGUAGUUUUGA&UCAAAAC----ACAGUGUUGCCAUC	5	124.583	0.155612	20	545.316	0.351348	124.583	545.316	yes
PC-5p-244_20103	TRINITY_DN98384_c0_g1	159	179	170	-35.1	-26.1	0.74359	5	1-10,179-170;13-14,167-166;16-21,164-159	11-12,169-168[SIL];15-15,165-165[SIL]	((((((.((..((((((((((&))))))))))..)).))))))	GAUGGCUACUAUGUGUUUUGA&UCAAAACACAGUGUUGCCAUC	7	174.416	0.00402453	8	218.126	0.00419995	174.416	218.126	yes
PC-5p-261857_21	TRINITY_DN108693_c0_g1	632	656	647	-35.8	-23.6	0.659218	13	2-10,655-647;11-17,642-636;19-21,634-632	1-1,656-656[UP5];x-x,646-643[BULt];18-18,635-635[SIL]	(((.(((((((....(((((((((.&.)))))))))----))))))).)))	GGUGGGGACCUCCAUGUUCACGUGC&ACACGUGAAC----GGGUUUCGAUU	0	0	NA	2	54.5316	0.752651	0	54.5316	yes
PC-5p-261857_21	TRINITY_DN109415_c1_g1	337	357	347	-35.8	-23.4	0.653631	6.5	2-3,356-355;4-15,353-342;17-21,341-337	1-1,357-357[UP5];x-x,354-354[BULt];16-16,x-x[BULq]	(((((-((((((((((((.((.&.))-)))))))))))).)))))	GGUUG-AACCUGUUCACGAUGG&ACA-CGUGAACGGGUUUCGAUU	0	0	NA	2	54.5316	0.529323	0	54.5316	yes
PC-5p-261857_21	TRINITY_DN113921_c0_g2	240	260	251	-35.8	-23.5	0.656425	8	1-7,260-254;9-18,252-243	8-8,253-253[SIL];19-21,242-240[UP3]	...((((((((((.(((((((&))))))).))))))))))...	CCGUGAAGCCUGUCUACGUGU&ACACGUGAACGGGUUUCGAUU	0	0	NA	1	27.2658	0.926602	0	27.2658	yes
PC-5p-261857_21	TRINITY_DN117287_c0_g1	1005	1024	1016	-35.8	-29.1	0.812849	5	1-8,1024-1017;10-21,1016-1005	9-9,x-x[BULq]	((((((((((((-((((((((&)))))))).))))))))))))	GGUCGAGGCUCG-UCACGUGU&ACACGUGAACGGGUUUCGAUU	0	0	NA	1	27.2658	0.062455	0	27.2658	yes
PC-5p-261857_21	TRINITY_DN122079_c0_g1	683	705	696	-35.8	-24.7	0.689944	7	2-8,704-698;10-14,696-692;16-20,688-684	1-1,705-705[UP5];9-9,697-697[SIL];15-15,691-689[AILt];21-21,683-683[UP3]	.(((((...(((((.(((((((.&.))))))).)))))--.))))).	CAUCGAUACACCCGGUCACGUGG&ACACGUGAACGGGU--UUCGAUU	1	24.9165	0.676757	0	0	NA	24.9165	0	yes
PC-5p-261857_21	TRINITY_DN93935_c0_g1	362	382	373	-35.8	-25.8	0.72067	11	4-17,379-366	1-3,382-380[UP5];18-21,365-362[UP3]	....((((((((((((((...&...))))))))))))))....	UACGGGAGCCCGUUCGCGGCG&ACACGUGAACGGGUUUCGAUU	8	199.332	0.24685	4	109.063	0.110614	199.332	109.063	yes
PC-5p-261857_21	TRINITY_DN99057_c0_g2	197	216	208	-35.8	-23.4	0.653631	7.5	2-7,215-210;10-13,208-205;15-21,203-197	1-1,216-216[UP5];8-9,209-209[AILq];14-14,204-204[SIL]	(((((((.((((.-((((((.&.))))))..)))).)))))))	AAUCGGAUCCCGG-UACGUGG&ACACGUGAACGGGUUUCGAUU	0	0	NA	1	27.2658	0.935484	0	27.2658	yes
PC-5p-278388_19	TRINITY_DN103420_c1_g2	188	213	202	-47.7	-32	0.67086	9.5	2-2,212-212;4-8,210-206;9-16,203-196;17-23,194-188	1-1,213-213[UP5];3-3,211-211[SIL];x-x,205-204[BULt];x-x,195-195[BULt]	(((((((.((((((((..(((((.(.&.).)))))--))))))))-)))))))	UAUUGGGUUCGGGUUGAUCGGGUGGC&AUGACCCG--CAACCCGA-CCCGAUA	1	24.9165	0.975008	0	0	NA	24.9165	0	yes
PC-5p-278388_19	TRINITY_DN106089_c1_g1	803	829	819	-47.7	-32.6	0.683438	8.5	1-9,829-821;10-14,819-815;17-19,812-810;20-23,806-803	x-x,820-820[BULt];15-16,814-813[SIL];x-x,809-807[BULt]	((((...(((..(((((.(((((((((&)))))))))-)))))..)))---))))	UGUCCAGGGGAAGGGUUGGCGGGUCGU&AUGACCCGC-AACCCGACCC---GAUA	1	24.9165	0.938316	0	0	NA	24.9165	0	yes
PC-5p-278388_19	TRINITY_DN107334_c2_g2	886	908	900	-47.7	-31.4	0.658281	9.5	3-8,906-901;10-16,900-894;17-22,892-887	1-2,908-907[UP5];9-9,x-x[BULq];x-x,893-893[BULt];23-23,886-886[UP3]	.((((((.(((((((-((((((..&..)))))).)))))))-)))))).	AGUCGGGUUCGGGUU-UGGGUUGG&AUGACCCGCAACCCGA-CCCGAUA	9	224.249	0.60858	1	27.2658	0.980433	224.249	27.2658	yes
PC-5p-278388_19	TRINITY_DN109876_c6_g1	543	574	565	-47.7	-31.3	0.656184	16	3-9,572-566;11-13,564-562;14-22,552-544	1-2,574-573[UP5];10-10,565-565[SIL];x-x,561-553[BULt];23-23,543-543[UP3]	.(((((((((.........(((.(((((((..&..))))))).)))---------))))))))).	AGUCGGGUUGAAUUGAGUUGGUAGCGGGUCGG&AUGACCCGCAACC---------CGACCCGAUA	1	24.9165	0.993555	0	0	NA	24.9165	0	yes
PC-5p-278388_19	TRINITY_DN111570_c0_g1	36	58	49	-47.7	-33.2	0.696017	7.5	2-2,57-57;4-8,55-51;10-21,49-38	1-1,58-58[UP5];3-3,56-56[SIL];9-9,50-50[SIL];22-23,37-36[UP3]	..((((((((((((.(((((.(.&.).))))).))))))))))))..	AUUUGGGUCGGGUUUCGGGUGAA&AUGACCCGCAACCCGACCCGAUA	0	0	NA	1	27.2658	0.835646	0	27.2658	yes
PC-5p-278388_19	TRINITY_DN112873_c1_g3	495	517	508	-47.7	-33.5	0.702306	9.5	3-7,515-511;9-19,509-499	1-2,517-516[UP5];8-8,510-510[SIL];20-23,498-495[UP3]	....(((((((((((.(((((..&..))))).)))))))))))....	UGAUGGGUUGGGUUGAGGGUCGA&AUGACCCGCAACCCGACCCGAUA	0	0	NA	1	27.2658	0.787279	0	27.2658	yes
PC-5p-278388_19	TRINITY_DN117835_c1_g1	744	775	757	-47.7	-31.86	0.667925	24.5	1-9,775-767;12-14,755-753;16-23,751-744	10-11,766-756[AILt];15-15,752-752[SIL]	((((((((.(((...........(((((((((&)))))))))---------..))).))))))))	UGUCGGGUGGGGAGGAUUUGAUGGCGGGUUAU&AUGACCCGC---------AACCCGACCCGAUA	3	74.7496	0.878268	0	0	NA	74.7496	0	yes
PC-5p-278388_19	TRINITY_DN119676_c0_g1	1375	1397	1387	-47.7	-34.1	0.714885	7	2-9,1396-1389;10-14,1387-1383;16-20,1382-1378	1-1,1397-1397[UP5];x-x,1388-1388[BULt];15-15,x-x[BULq];21-23,1377-1375[UP3]	...(((((-(((((.((((((((.&.))))))))-))))).)))))...	GGGCGGGU-GGGUUAGCGGGUCAG&AUGACCCGC-AACCCGACCCGAUA	2	49.8331	0.55513	1	27.2658	0.724677	49.8331	27.2658	yes
PC-5p-278388_19	TRINITY_DN121206_c1_g1	1269	1291	1282	-47.7	-35.6	0.746331	8.5	2-8,1290-1284;11-21,1281-1271	1-1,1291-1291[UP5];9-10,1283-1282[SIL];22-23,1270-1269[UP3]	..(((((((((((..(((((((.&.)))))))..)))))))))))..	GUUUGGGUCGGGUGACGGGUCGG&AUGACCCGCAACCCGACCCGAUA	1	24.9165	0.546403	0	0	NA	24.9165	0	yes
PC-5p-278388_19	TRINITY_DN124145_c0_g1	3342	3366	3356	-47.7	-33.3	0.698113	8.5	1-2,3366-3365;4-8,3363-3359;9-14,3357-3352;17-23,3348-3342	3-3,3364-3364[SIL];x-x,3358-3358[BULt];15-16,3351-3349[AILt]	(((((((...((((((.(((((.((&)).)))))-))))))-..)))))))	UGUCGGGAAAGGGUUGUCGGGUGGU&AUGACCCG-CAACCC-GACCCGAUA	1	24.9165	0.858795	0	0	NA	24.9165	0	yes
PC-5p-278388_19	TRINITY_DN93344_c0_g1	245	267	258	-47.7	-33.5	0.702306	10	4-8,264-260;10-20,258-248	1-3,267-265[UP5];9-9,259-259[SIL];21-23,247-245[UP3]	...(((((((((((.(((((...&...))))).)))))))))))...	UCGCGGGUCGGGUUUCGGGUAAA&AUGACCCGCAACCCGACCCGAUA	2	49.8331	0.313897	2	54.5316	0.336539	49.8331	54.5316	yes
PC-5p-278388_19	TRINITY_DN99488_c0_g1	832	855	845	-47.7	-32.1	0.672956	9	2-3,854-853;5-7,851-849;8-14,847-841;16-20,839-835	1-1,855-855[UP5];4-4,852-852[SIL];x-x,848-848[BULt];15-15,840-840[SIL];21-23,834-832[UP3]	...(((((.(((((((.(((.((.&.)).)))-))))))).)))))...	UUGCGGGUGGGGUUGCAGGGGCAG&AUGACCC-GCAACCCGACCCGAUA	0	0	NA	2	54.5316	0.833117	0	54.5316	yes
PC-5p-292328_18	TRINITY_DN100429_c1_g1	90	117	107	-34.4	-23	0.668605	9.5	1-4,117-114;5-5,112-112;7-20,110-97;21-24,93-90	x-x,113-113[BULt];6-6,111-111[SIL];x-x,96-94[BULt]	((((...((((((((((((((.(.((((&))))-).))))))))))))))---))))	ACAUCUUUGGAGUGUGCAAAUGGCAAGU&AUUU-UGAUUUGCACACUCUA---AUGU	11	274.082	0.264741	12	327.189	0.284609	274.082	327.189	yes
PC-5p-292328_18	TRINITY_DN105241_c0_g1	211	231	222	-34.4	-22.5	0.65407	6.5	2-12,230-220;14-19,219-214;22-24,213-211	1-1,231-231[UP5];13-13,x-x[BULq];20-21,x-x[BULq]	(((--((((((-(((((((((((.&.))))))))))).))))))..)))	ACA--GGAGUG-GCAGAUCAAAGG&AUUUUGAUUUGCACACUCUAAUGU	1	24.9165	0.873874	5	136.329	0.661133	24.9165	136.329	yes
PC-5p-292328_18	TRINITY_DN110066_c2_g2	69	89	80	-34.4	-22.8	0.662791	6	2-12,88-78;16-24,77-69	1-1,89-89[UP5];13-15,x-x[BULq]	(((((((((---(((((((((((.&.)))))))))))...)))))))))	GCAUUGGAG---GCAAGUCAAAAG&AUUUUGAUUUGCACACUCUAAUGU	1	24.9165	0.841913	0	0	NA	24.9165	0	yes
PC-5p-292328_18	TRINITY_DN110904_c0_g2	630	658	649	-34.4	-24.6	0.715116	15.5	5-16,654-643;17-24,637-630	1-4,658-655[UP5];x-x,642-638[BULt]	((((((((.....((((((((((((....&....))))))))))))-----))))))))	GCGUUGGAAAAAGGUGUGCGAGUCAUUGA&AUUUUGAUUUGCACAC-----UCUAAUGU	1	24.9165	0.339062	0	0	NA	24.9165	0	yes
PC-5p-292328_18	TRINITY_DN112163_c0_g2	164	191	178	-34.4	-23.1	0.671512	14.5	2-9,190-183;10-20,178-168;22-23,166-165	1-1,191-191[UP5];x-x,182-179[BULt];21-21,167-167[SIL];24-24,164-164[UP3]	.((.(((((((((((....((((((((.&.))))))))----))))))))))).)).	CCGGUAGAGUGUGCGACAUGAUCAAGAG&AUUUUGAUU----UGCACACUCUAAUGU	0	0	NA	1	27.2658	0.715654	0	27.2658	yes
PC-5p-292328_18	TRINITY_DN119662_c0_g1	1447	1470	1461	-34.4	-24	0.697674	14.5	7-24,1464-1447	1-6,1470-1465[UP5]	((((((((((((((((((......&......))))))))))))))))))	GCGUUAGGGUGUGUGAAUAGUGUA&AUUUUGAUUUGCACACUCUAAUGU	3	74.7496	0.372327	1	27.2658	0.523668	74.7496	27.2658	yes
PC-5p-292328_18	TRINITY_DN119662_c0_g1	76	99	90	-34.4	-24	0.697674	14.5	7-24,93-76	1-6,99-94[UP5]	((((((((((((((((((......&......))))))))))))))))))	GCGUUAGGGUGUGUGAAUAGUGUA&AUUUUGAUUUGCACACUCUAAUGU	1	24.9165	0.594843	1	27.2658	0.538783	24.9165	27.2658	yes
PC-5p-292328_18	TRINITY_DN124364_c8_g1	683	706	697	-34.4	-22.4	0.651163	10	2-17,705-690	1-1,706-706[UP5];18-24,689-683[UP3]	.......((((((((((((((((.&.)))))))))))))))).......	AAAAUCCAGUGUGCGAAUCAAGAA&AUUUUGAUUUGCACACUCUAAUGU	1	24.9165	0.887344	2	54.5316	0.680556	24.9165	54.5316	yes
PC-5p-292328_18	TRINITY_DN90407_c0_g1	472	495	486	-34.4	-23.1	0.671512	13	4-5,492-491;8-14,488-482;16-24,480-472	1-3,495-493[UP5];6-7,490-489[SIL];15-15,481-481[SIL]	(((((((((.(((((((..((...&...))..))))))).)))))))))	GCAUUGGAGCGUGCAAGGAGACUC&AUUUUGAUUUGCACACUCUAAUGU	1	24.9165	0.760813	0	0	NA	24.9165	0	yes
PC-5p-300698_17	TRINITY_DN113149_c0_g1	299	322	313	-38.5	-25.9	0.672727	13.5	6-10,317-313;12-24,311-299	1-5,322-318[UP5];11-11,312-312[SIL]	(((((((((((((.(((((.....&.....))))).)))))))))))))	GAUCACUGCUUGGAACGUCGCCCG&AAAAUGACGUGUCAGGUAGUGAUU	1	24.9165	0.431455	0	0	NA	24.9165	0	yes
PC-5p-33949_249	TRINITY_DN100561_c0_g4	164	188	179	-35.2	-23.4	0.664773	9	2-4,187-185;6-13,183-176;14-20,172-166	1-1,188-188[UP5];5-5,184-184[SIL];x-x,175-173[BULt];21-22,165-164[UP3]	..(((((((...((((((((.(((.&.))).))))))))---)))))))..	ACUGGCUCAGACCAGUCAUCAAACA&AGUUAGAUGAUUG---UGAGCCAUU	2	49.8331	0.487719	0	0	NA	49.8331	0	yes
PC-5p-33949_249	TRINITY_DN101036_c3_g1	226	248	238	-35.2	-23	0.653409	9	1-4,248-245;6-11,242-237;13-22,235-226	5-5,244-243[AILt];12-12,236-236[SIL]	((((((((((.((((((..((((&))))-.)))))).))))))))))	GGUGGUUCAUCAUCAUCAGAGCU&AGUU-AGAUGAUUGUGAGCCAUU	3	74.7496	0.629088	1	27.2658	0.984387	74.7496	27.2658	yes
PC-5p-33949_249	TRINITY_DN107255_c2_g2	377	399	390	-35.2	-22.9	0.650568	9.5	2-18,398-382;19-19,380-380	1-1,399-399[UP5];x-x,381-381[BULt];20-22,379-377[UP3]	...(.(((((((((((((((((.&.)))))))))))))))))-)...	AAGGUGUUCACGGUCAUUUGACC&AGUUAGAUGAUUGUGAGC-CAUU	2	49.8331	0.653886	0	0	NA	49.8331	0	yes
PC-5p-33949_249	TRINITY_DN107334_c2_g2	541	561	553	-35.2	-23.4	0.664773	8.5	2-6,560-556;8-20,555-543	1-1,561-561[UP5];7-7,x-x[BULq];21-22,542-541[UP3]	..(((((((((((((-(((((.&.))))).)))))))))))))..	GUUGGCUUACAGUUG-CUAACA&AGUUAGAUGAUUGUGAGCCAUU	2	49.8331	0.467643	0	0	NA	49.8331	0	yes
PC-5p-33949_249	TRINITY_DN107416_c1_g1	1176	1197	1188	-35.2	-25	0.710227	5.5	1-15,1197-1183;17-19,1181-1179	16-16,1182-1182[SIL];20-22,1178-1176[UP3]	...(((.(((((((((((((((&))))))))))))))).)))...	AGAGGUGCACAAUUAUCUAACU&AGUUAGAUGAUUGUGAGCCAUU	1	24.9165	0.651481	2	54.5316	0.208993	24.9165	54.5316	yes
PC-5p-33949_249	TRINITY_DN109293_c2_g1	556	577	568	-35.2	-23.7	0.673295	9.5	1-2,577-576;5-7,573-571;9-21,569-557	3-4,575-574[SIL];8-8,570-570[SIL];22-22,556-556[UP3]	.(((((((((((((.(((..((&))..))).))))))))))))).	UGUGGCUCACGAUUCUCUUCCU&AGUUAGAUGAUUGUGAGCCAUU	1	24.9165	0.913441	0	0	NA	24.9165	0	yes
PC-5p-33949_249	TRINITY_DN109742_c0_g1	1228	1249	1240	-35.2	-26.5	0.752841	6.5	1-3,1249-1247;5-20,1245-1230	4-4,1246-1246[SIL];21-22,1229-1228[UP3]	..((((((((((((((((.(((&))).))))))))))))))))..	UUUGGCUCAUAAUCAUUUCGCU&AGUUAGAUGAUUGUGAGCCAUU	0	0	NA	9	245.392	0.210302	0	245.392	yes
PC-5p-33949_249	TRINITY_DN111940_c0_g3	95	116	107	-35.2	-23	0.653409	9	1-8,116-109;10-19,107-98	9-9,108-108[SIL];20-22,97-95[UP3]	...((((((((((.((((((((&)))))))).))))))))))...	AAAGGUUUACAGUGAUUUGACU&AGUUAGAUGAUUGUGAGCCAUU	3	74.7496	0.923592	0	0	NA	74.7496	0	yes
PC-5p-33949_249	TRINITY_DN112196_c0_g1	2253	2274	2265	-35.2	-24.2	0.6875	7.5	2-9,2273-2266;11-15,2264-2260;17-21,2258-2254	1-1,2274-2274[UP5];10-10,2265-2265[SIL];16-16,2259-2259[SIL];22-22,2253-2253[UP3]	.(((((.(((((.((((((((.&.)))))))).))))).))))).	CGUGGCCCACAGACGUCUAACA&AGUUAGAUGAUUGUGAGCCAUU	1	24.9165	0.809172	0	0	NA	24.9165	0	yes
PC-5p-33949_249	TRINITY_DN114323_c1_g4	12	32	24	-35.2	-22.9	0.650568	10	4-8,29-25;11-22,23-12	1-3,32-30[UP5];9-10,24-24[AILq]	((((((((((((.-(((((...&...)))))..))))))))))))	AAUGGCUCACGAG-AUCUACGA&AGUUAGAUGAUUGUGAGCCAUU	2	49.8331	0.659167	2	54.5316	0.690328	49.8331	54.5316	yes
PC-5p-33949_249	TRINITY_DN114448_c1_g5	100	128	119	-35.2	-23.2	0.659091	18	2-12,127-117;13-14,109-108;16-22,106-100	1-1,128-128[UP5];x-x,116-110[BULt];15-15,107-107[SIL]	(((((((.((.......(((((((((((.&.)))))))))))-------)).)))))))	GAUGGCUGAUCAUGCUGAAUCAUCUGACC&AGUUAGAUGAUU-------GUGAGCCAUU	0	0	NA	1	27.2658	0.969269	0	27.2658	yes
PC-5p-33949_249	TRINITY_DN114848_c3_g2	178	206	197	-35.2	-23.3	0.661932	20	3-10,204-197;11-20,189-180	1-2,206-205[UP5];x-x,196-190[BULt];21-22,179-178[UP3]	..((((((((((.......((((((((..&..))))))))-------))))))))))..	UUUGGCUCACAGAAUAUUUUCAUCUAAAG&AGUUAGAUGA-------UUGUGAGCCAUU	2	49.8331	0.850945	0	0	NA	49.8331	0	yes
PC-5p-33949_249	TRINITY_DN116670_c0_g1	241	260	253	-35.2	-23.18	0.658523	12	1-8,260-253;13-19,250-244	9-12,252-251[AILq];20-22,243-241[UP3]	...(((((((..--((((((((&))))))))....)))))))...	GGCGGCUCACUG--GUCUAACU&AGUUAGAUGAUUGUGAGCCAUU	0	0	NA	1	27.2658	0.970244	0	27.2658	yes
PC-5p-33949_249	TRINITY_DN117860_c0_g1	1927	1955	1946	-35.2	-23.2	0.659091	12.5	2-14,1954-1942;15-19,1934-1930	1-1,1955-1955[UP5];x-x,1941-1935[BULt];20-22,1929-1927[UP3]	...(((((.......(((((((((((((.&.)))))))))))))-------)))))...	UUGGGCUCCCGAGCCAUAAUCAUCUGACC&AGUUAGAUGAUUGU-------GAGCCAUU	2	49.8331	0.883099	4	109.063	0.875767	49.8331	109.063	yes
PC-5p-33949_249	TRINITY_DN118789_c6_g1	1775	1797	1789	-35.2	-23.1	0.65625	11	2-4,1796-1794;6-11,1793-1788;12-19,1785-1778	1-1,1797-1797[UP5];5-5,x-x[BULq];x-x,1787-1786[BULt];20-22,1777-1775[UP3]	...((((((((..((((((-(((.&.))).))))))--))))))))...	UUGGGCUCACAGUAUCAUC-AGCA&AGUUAGAUGAU--UGUGAGCCAUU	0	0	NA	1	27.2658	0.973845	0	27.2658	yes
PC-5p-33949_249	TRINITY_DN119132_c0_g3	315	341	331	-35.2	-23.4	0.664773	14	1-5,341-337;7-8,335-334;9-11,332-330;12-22,325-315	6-6,336-336[SIL];x-x,333-333[BULt];x-x,329-326[BULt]	(((((((((((....(((.((.(((((&))))).))-)))----)))))))))))	AAUGGCUCACAGAAGGUCGGUGUAACU&AGUUAGAU-GAU----UGUGAGCCAUU	1	24.9165	0.950787	2	54.5316	0.488216	24.9165	54.5316	yes
PC-5p-33949_249	TRINITY_DN120750_c0_g1	1496	1516	1508	-35.2	-23.1	0.65625	11	3-9,1514-1508;11-19,1507-1499	1-2,1516-1515[UP5];10-10,x-x[BULq];20-22,1498-1496[UP3]	...(((((((((-(((((((..&..))))))).)))))))))...	UGGGGCUCACAA-CGUCUGGUU&AGUUAGAUGAUUGUGAGCCAUU	1	24.9165	0.988229	0	0	NA	24.9165	0	yes
PC-5p-33949_249	TRINITY_DN122597_c2_g1	441	462	453	-35.2	-22.9	0.650568	15	6-20,457-443	1-5,462-458[UP5];21-22,442-441[UP3]	..(((((((((((((((.....&.....)))))))))))))))..	UUUGGCUCACGGUUGUCCAAAU&AGUUAGAUGAUUGUGAGCCAUU	2	49.8331	0.93369	0	0	NA	49.8331	0	yes
PC-5p-33949_249	TRINITY_DN123151_c1_g1	1454	1475	1466	-35.2	-33	0.9375	2	1-22,1475-1454	NA	((((((((((((((((((((((&))))))))))))))))))))))	AAUGGCUCACAAUUGUCUAACU&AGUUAGAUGAUUGUGAGCCAUU	3	74.7496	0.0200457	0	0	NA	74.7496	0	yes
PC-5p-33949_249	TRINITY_DN123184_c1_g1	1000	1021	1012	-35.2	-25.5	0.724432	8	2-4,1020-1018;6-11,1016-1011;13-22,1009-1000	1-1,1021-1021[UP5];5-5,1017-1017[SIL];12-12,1010-1010[SIL]	((((((((((.((((((.(((.&.))).)))))).))))))))))	AGUGGCUCAUCGUCAUCAAGCG&AGUUAGAUGAUUGUGAGCCAUU	3	74.7496	0.333015	0	0	NA	74.7496	0	yes
PC-5p-33949_249	TRINITY_DN92081_c2_g2	236	257	249	-35.2	-25.7	0.730114	5.5	1-7,257-251;9-12,250-247;13-22,245-236	8-8,x-x[BULq];x-x,246-246[BULt]	((((((((((.((((-(((((((&))))))).))))-))))))))))	AAUGGCUCAUAAGUC-UCUAACU&AGUUAGAUGAUU-GUGAGCCAUU	1	24.9165	0.47269	4	109.063	0.132677	24.9165	109.063	yes
PC-5p-33949_249	TRINITY_DN92737_c0_g1	859	881	872	-35.2	-24.9	0.707386	8	2-10,880-872;11-19,870-862	1-1,881-881[UP5];x-x,871-871[BULt];20-22,861-859[UP3]	...(((((((((.(((((((((.&.)))))))))-)))))))))...	UGCGGUUCAUAGCUCAUCUAACA&AGUUAGAUGA-UUGUGAGCCAUU	0	0	NA	1	27.2658	0.619914	0	27.2658	yes
PC-5p-33949_249	TRINITY_DN96299_c2_g1	1116	1138	1129	-35.2	-23.8	0.676136	8	2-18,1137-1121;19-20,1119-1118	1-1,1138-1138[UP5];x-x,1120-1120[BULt];21-22,1117-1116[UP3]	..((.(((((((((((((((((.&.)))))))))))))))))-))..	AUUGAGUUCGCAAUCAUUUGGCC&AGUUAGAUGAUUGUGAGC-CAUU	3	74.7496	0.359766	1	27.2658	0.845911	74.7496	27.2658	yes
PC-5p-33949_249	TRINITY_DN97801_c1_g2	3491	3512	3503	-35.2	-27.4	0.778409	9	2-8,3511-3505;11-22,3502-3491	1-1,3512-3512[UP5];9-10,3504-3503[SIL]	((((((((((((..(((((((.&.)))))))..))))))))))))	GAUGGUUCACAGGAGUCUGACC&AGUUAGAUGAUUGUGAGCCAUU	2	49.8331	0.0523956	1	27.2658	0.202056	49.8331	27.2658	yes
PC-5p-3467_1756	TRINITY_DN107878_c3_g3	349	369	360	-34.3	-26	0.758017	7	3-3,367-367;5-21,365-349	1-2,369-368[UP5];4-4,366-366[SIL]	(((((((((((((((((.(..&..).)))))))))))))))))	GUCAGUAAAUCUAUCGAGGAG&CACGUUGAUAGGUUUACUGAC	2	49.8331	0.0302852	4	109.063	0.0329379	49.8331	109.063	yes
PC-5p-3467_1756	TRINITY_DN107936_c1_g1	159	180	171	-34.3	-22.4	0.653061	8.5	3-17,178-164;18-18,162-162;20-21,160-159	1-2,180-179[UP5];x-x,163-163[BULt];19-19,161-161[SIL]	((.(.(((((((((((((((..&..)))))))))))))))-).))	GUGGCGUGAGCUUGUCAACGGU&CACGUUGAUAGGUUUAC-UGAC	1	24.9165	0.899374	0	0	NA	24.9165	0	yes
PC-5p-3467_1756	TRINITY_DN108106_c0_g3	880	903	891	-34.3	-24.8	0.723032	11	1-3,903-901;5-6,899-898;7-20,894-881	4-4,900-900[SIL];x-x,897-895[BULt];21-21,880-880[UP3]	.((((((((((((((...((.(((&))).))---)))))))))))))).	CUCAGUGGACCUAUCCAGGAGGUG&CACGUU---GAUAGGUUUACUGAC	1	24.9165	0.287379	0	0	NA	24.9165	0	yes
PC-5p-3467_1756	TRINITY_DN114786_c1_g2	1505	1523	1516	-34.3	-24.3	0.708455	7	1-3,1523-1521;6-21,1520-1505	4-5,x-x[BULq]	((((((((((((((((--(((&)))..))))))))))))))))	GUCAGUAAAUCUGUCG--GUG&CACGUUGAUAGGUUUACUGAC	1	24.9165	0.431455	0	0	NA	24.9165	0	yes
PC-5p-3467_1756	TRINITY_DN114915_c0_g4	142	162	153	-34.3	-23.6	0.688047	6	1-17,162-146	18-21,145-142[UP3]	....(((((((((((((((((&)))))))))))))))))....	CUAUGUAAACUUAUCAAUGUG&CACGUUGAUAGGUUUACUGAC	0	0	NA	1	27.2658	0.581309	0	27.2658	yes
PC-5p-3467_1756	TRINITY_DN115078_c0_g1	506	526	517	-34.3	-22.6	0.658892	8	4-12,523-515;14-20,513-507	1-3,526-524[UP5];13-13,514-514[SIL];21-21,506-506[UP3]	.(((((((.(((((((((...&...))))))))).))))))).	AUCAGUAACCCUGUCAACUCG&CACGUUGAUAGGUUUACUGAC	1	24.9165	0.841913	0	0	NA	24.9165	0	yes
PC-5p-3467_1756	TRINITY_DN116243_c3_g2	410	430	421	-34.3	-33.3	0.970845	1.5	1-21,430-410	NA	(((((((((((((((((((((&)))))))))))))))))))))	GUCAGUGAACUUAUCAACGUG&CACGUUGAUAGGUUUACUGAC	0	0	NA	2	54.5316	0.0083382	0	54.5316	yes
PC-5p-3467_1756	TRINITY_DN122377_c1_g1	1812	1835	1826	-34.3	-22.9	0.667638	11.5	1-10,1835-1826;11-14,1822-1819;17-20,1816-1813	x-x,1825-1823[BULt];15-16,1818-1817[SIL];21-21,1812-1812[UP3]	.((((..((((...((((((((((&))))))))))---))))..)))).	UUCAGGAAGCCAAAUGUCAGCGUG&CACGUUGAUA---GGUUUACUGAC	0	0	NA	2	54.5316	0.562364	0	54.5316	yes
PC-5p-3467_1756	TRINITY_DN122923_c2_g2	46	74	57	-34.3	-22.8	0.664723	20	2-9,73-66;10-21,57-46	1-1,74-74[UP5];x-x,65-58[BULt]	((((((((((((........((((((((.&.))))))))--------))))))))))))	GUUAGUAAGCCUUUGAUUAGAUCGGCGUA&CACGUUGAU--------AGGUUUACUGAC	1	24.9165	0.823012	1	27.2658	0.773108	24.9165	27.2658	yes
PC-5p-3467_1756	TRINITY_DN93672_c1_g2	223	242	233	-34.3	-23.9	0.696793	7.5	1-6,242-237;8-10,235-233;12-14,231-229;16-21,228-223	7-7,236-236[SIL];11-11,232-232[SIL];15-15,x-x[BULq]	((((((-(((.(((.((((((&)))))).))).))).))))))	GUCAGU-GACGUAUGGGCGUG&CACGUUGAUAGGUUUACUGAC	2	49.8331	0.276742	0	0	NA	49.8331	0	yes
PC-5p-3467_1756	TRINITY_DN96727_c1_g2	90	113	101	-34.3	-23.6	0.688047	15	1-9,113-105;13-21,98-90	10-12,104-99[AILt]	(((((((((......(((((((((&)))))))))---...)))))))))	GUCGGUGAAAUAUGGGUCGACGUG&CACGUUGAU---AGGUUUACUGAC	0	0	NA	3	81.7974	0.400441	0	81.7974	yes
PC-5p-3467_1756	TRINITY_DN97399_c0_g1	795	817	806	-34.3	-22.9	0.667638	7.5	1-5,817-813;6-7,811-810;8-21,808-795	x-x,812-812[BULt];x-x,809-809[BULt]	((((((((((((((.((.(((((&)))))-))-))))))))))))))	GUUGGUGAAUCUAUACAUGCGUG&CACGU-UG-AUAGGUUUACUGAC	2	49.8331	0.287008	1	27.2658	0.757994	49.8331	27.2658	yes
PC-5p-357428_13	TRINITY_DN101673_c0_g1	265	289	280	-29.1	-20.06	0.689347	12	1-11,289-279;14-21,272-265	12-13,278-273[AILt]	((((((((......(((((((((((&)))))))))))----..))))))))	ACGAUGUACAAGGCUGUUUUAUCGG&CCGAUAAAACA----AUUACGUUGU	4	99.6661	0.319371	2	54.5316	0.311908	99.6661	54.5316	yes
PC-5p-357428_13	TRINITY_DN106754_c2_g1	547	567	558	-29.1	-30.4	1	0	1-21,567-547	NA	(((((((((((((((((((((&)))))))))))))))))))))	ACAACGUAAUUGUUUUAUCGG&CCGAUAAAACAAUUACGUUGU	1	24.9165	0.0369453	1	27.2658	0.0317309	24.9165	27.2658	yes
PC-5p-357428_13	TRINITY_DN108414_c0_g1	1626	1646	1637	-29.1	-20.88	0.717526	8	1-6,1646-1641;10-21,1637-1626	7-9,1640-1638[SIL]	((((((((((((...((((((&))))))...))))))))))))	ACAACGUAAUUGACAUGUUGG&CCGAUAAAACAAUUACGUUGU	3	74.7496	0.0740019	7	190.861	0.178607	74.7496	190.861	yes
PC-5p-357428_13	TRINITY_DN110921_c0_g1	313	333	324	-29.1	-19.8	0.680412	6.5	1-11,333-323;13-18,321-316	12-12,322-322[SIL];19-21,315-313[UP3]	...((((((.(((((((((((&))))))))))).))))))...	AAUAUGUAAAUGUUUUGUCGG&CCGAUAAAACAAUUACGUUGU	5	124.583	0.0142991	1	27.2658	0.553418	124.583	27.2658	yes
PC-5p-357428_13	TRINITY_DN111224_c0_g1	281	304	292	-29.1	-19.7	0.676976	14.5	1-6,304-299;10-13,292-289;16-21,286-281	7-9,298-293[AILt];14-15,288-287[SIL]	((((((..((((......((((((&))))))---...))))..))))))	GCAACGGUAUUGGCGAUGUAUCGG&CCGAUA---AAACAAUUACGUUGU	1	24.9165	0.63811	0	0	NA	24.9165	0	yes
PC-5p-357428_13	TRINITY_DN114417_c0_g1	565	585	576	-29.1	-21.6	0.742268	6	1-13,585-573;16-18,570-568	14-15,572-571[SIL];19-21,567-565[UP3]	...(((..(((((((((((((&)))))))))))))..)))...	UAUGCGGGGUUGUUUUAUCGG&CCGAUAAAACAAUUACGUUGU	0	0	NA	1	27.2658	0.175907	0	27.2658	yes
PC-5p-357428_13	TRINITY_DN116214_c3_g1	368	392	379	-29.1	-19.3	0.66323	10.5	1-8,392-385;9-15,380-374;17-21,372-368	x-x,384-381[BULt];16-16,373-373[SIL]	(((((.(((((((....((((((((&))))))))----))))))).)))))	ACAACAUGAUUGUCCCUUUUGUCGG&CCGAUAAA----ACAAUUACGUUGU	1	24.9165	0.778161	0	0	NA	24.9165	0	yes
PC-5p-357428_13	TRINITY_DN116222_c0_g1	28	49	39	-29.1	-19.12	0.657045	10.5	1-3,49-47;7-13,42-36;15-21,34-28	4-6,46-43[AILt];14-14,35-35[SIL]	(((((((.(((((((....(((&)))-...))))))).)))))))	ACGGCGUUGUUGUUUGUCGCGG&CCG-AUAAAACAAUUACGUUGU	3	74.7496	0.636679	3	81.7974	0.342071	74.7496	81.7974	yes
PC-5p-357428_13	TRINITY_DN121845_c0_g2	152	173	164	-29.1	-20.2	0.694158	6.5	1-11,173-163;13-15,160-158;17-21,156-152	12-12,162-161[AILt];16-16,157-157[SIL]	(((((.(((..(((((((((((&)))))))))))-.))).)))))	ACAACAUAGGAUGUUUUGUCGG&CCGAUAAAACA-AUUACGUUGU	40	996.661	0.261948	33	899.771	0.00897829	996.661	899.771	yes
PC-5p-357428_13	TRINITY_DN98954_c1_g1	1625	1646	1637	-29.1	-19.7	0.676976	7.5	3-13,1644-1634;16-21,1630-1625	1-2,1646-1645[UP5];14-15,1633-1631[AILt]	((((((...(((((((((((..&..)))))))))))-..))))))	GCAGCGGUUGUUGUUUUAUCUG&CCGAUAAAACAAU-UACGUUGU	1	24.9165	0.651481	0	0	NA	24.9165	0	yes
PC-5p-357428_13	TRINITY_DN98970_c2_g2	1627	1645	1636	-29.1	-19.6	0.67354	5.5	1-11,1645-1635;13-15,1634-1632;17-21,1631-1627	12-12,x-x[BULq];16-16,x-x[BULq]	(((((-(((-(((((((((((&))))))))))).))).)))))	GCAGC-UAG-UGUUUUGUCGG&CCGAUAAAACAAUUACGUUGU	9	224.249	0.455279	1	27.2658	0.619914	224.249	27.2658	yes
PC-5p-381818_11	TRINITY_DN113192_c0_g3	1374	1399	1390	-43.4	-29.2	0.672811	8.5	2-10,1398-1390;11-16,1387-1382;18-23,1380-1375	1-1,1399-1399[UP5];x-x,1389-1388[BULt];17-17,1381-1381[SIL];24-24,1374-1374[UP3]	.((((((.((((((..(((((((((.&.)))))))))--)))))).)))))).	UACAUUAGCCACCUUGUUCACCAAUG&AAUUGGUGGA--AGGUGGGUAGUGUU	1	24.9165	0.98468	0	0	NA	24.9165	0	yes
PC-5p-381818_11	TRINITY_DN114435_c1_g2	1943	1971	1957	-43.4	-30.3	0.698157	14.5	2-7,1970-1965;8-18,1959-1949;20-24,1947-1943	1-1,1971-1971[UP5];x-x,1964-1960[BULt];19-19,1948-1948[SIL]	(((((.(((((((((((.....((((((.&.))))))-----))))))))))).)))))	AACGCAACCCACUUUCCCUUCGGCCAAUG&AAUUGGU-----GGAAGGUGGGUAGUGUU	1	24.9165	0.816222	0	0	NA	24.9165	0	yes
PC-5p-381818_11	TRINITY_DN116964_c0_g1	2261	2284	2275	-43.4	-28.3	0.652074	9.5	4-11,2281-2274;14-19,2272-2267;20-24,2265-2261	1-3,2284-2282[UP5];12-13,2273-2273[AILq];x-x,2266-2266[BULt]	(((((.((((((.-((((((((...&...))))))))..))))))-)))))	GACACAUACCCAA-UUCCACCAUUG&AAUUGGUGGAAGGUGGGUA-GUGUU	1	24.9165	0.999555	0	0	NA	24.9165	0	yes
PC-5p-381818_11	TRINITY_DN122886_c2_g2	926	950	941	-43.4	-29.4	0.677419	11.5	5-16,946-935;17-22,933-928	1-4,950-947[UP5];x-x,934-934[BULt];23-24,927-926[UP3]	..((((((.((((((((((((....&....))))))))))))-))))))..	ACCACUACAUCACCUUCUACCUUGA&AAUUGGUGGAAGGUGG-GUAGUGUU	1	24.9165	0.96493	0	0	NA	24.9165	0	yes
PC-5p-381818_11	TRINITY_DN124445_c1_g1	114	137	128	-43.4	-33	0.760369	10.5	4-6,134-132;8-21,130-117	1-3,137-135[UP5];7-7,131-131[SIL];22-24,116-114[UP3]	...((((((((((((((.(((...&...))).))))))))))))))...	CCUGCUACCCACCUUCCUCCAUAU&AAUUGGUGGAAGGUGGGUAGUGUU	0	0	NA	3	81.7974	0.111351	0	81.7974	yes
PC-5p-381818_11	TRINITY_DN124587_c2_g1	201	225	216	-43.4	-33	0.760369	8	3-13,223-213;14-17,211-208;19-23,206-202	1-2,225-224[UP5];x-x,212-212[BULt];18-18,207-207[SIL];24-24,201-201[UP3]	.(((((.((((.(((((((((((..&..)))))))))))-)))).))))).	CGCGCUUCCCAGCCUUCCACCGAAG&AAUUGGUGGAAGG-UGGGUAGUGUU	1	24.9165	0.171572	0	0	NA	24.9165	0	yes
PC-5p-381818_11	TRINITY_DN91502_c0_g1	175	196	187	-43.4	-28.5	0.656682	8	1-13,196-184;16-21,183-178	14-15,x-x[BULq];22-24,177-175[UP3]	...((((((--(((((((((((((&)))))))))))))..))))))...	AAAACUACC--CCUUCCGCCGGUU&AAUUGGUGGAAGGUGGGUAGUGUU	2	49.8331	0.973341	2	54.5316	0.776601	49.8331	54.5316	yes
PC-5p-381818_11	TRINITY_DN91502_c0_g1	325	346	337	-43.4	-28.3	0.652074	8	2-13,345-334;16-21,333-328	1-1,346-346[UP5];14-15,x-x[BULq];22-24,327-325[UP3]	...((((((--((((((((((((.&.))))))))))))..))))))...	AAAACUACC--CCUUCCGCCAGUC&AAUUGGUGGAAGGUGGGUAGUGUU	1	24.9165	0.999483	7	190.861	0.980837	24.9165	190.861	yes
PC-5p-381818_11	TRINITY_DN92470_c1_g1	141	164	155	-43.4	-30.1	0.693548	8.5	3-18,162-147;20-22,145-143	1-2,164-163[UP5];19-19,146-146[SIL];23-24,142-141[UP3]	..(((.((((((((((((((((..&..)))))))))))))))).)))..	AUCGCAACCCACCUUUCACUAAAA&AAUUGGUGGAAGGUGGGUAGUGUU	1	24.9165	0.883022	0	0	NA	24.9165	0	yes
PC-5p-381818_11	TRINITY_DN94310_c1_g1	227	261	252	-43.4	-28.5	0.656682	16.5	3-14,259-248;15-18,235-232;20-24,231-227	1-2,261-260[UP5];x-x,247-236[BULt];19-19,x-x[BULq]	(((((-((((............((((((((((((..&..))))))))))))------------)))).)))))	GACAC-ACCCACCACCAUCGUAACCUUCCACCAACG&AAUUGGUGGAAGGU------------GGGUAGUGUU	1	24.9165	0.998723	0	0	NA	24.9165	0	yes
PC-5p-381818_11	TRINITY_DN99921_c2_g1	374	395	387	-43.4	-28.9	0.665899	7.5	1-9,395-387;13-17,384-380;19-24,379-374	10-12,386-385[AILq];18-18,x-x[BULq]	((((((-(((((..-(((((((((&)))))))))...))))).))))))	AGCACU-CCCACAC-CCACCAAUU&AAUUGGUGGAAGGUGGGUAGUGUU	1	24.9165	0.993793	0	0	NA	24.9165	0	yes
PC-5p-39433_216	TRINITY_DN110297_c0_g2	481	505	496	-42.5	-30.2	0.710588	13	2-10,504-496;13-20,492-485	1-1,505-505[UP5];11-12,495-493[AILt];21-24,484-481[UP3]	....((((((((...(((((((((.&.)))))))))-..))))))))....	GGAAGGGUGUGUUCGGUGGGGGUGA&AUAUCCCCAC-AUACACACCCAUAU	0	0	NA	1	27.2658	0.34242	0	27.2658	yes
PC-5p-39433_216	TRINITY_DN110436_c0_g2	1267	1288	1279	-42.5	-28.4	0.668235	10	3-10,1286-1279;12-14,1278-1276;16-22,1275-1269	1-2,1288-1287[UP5];11-11,x-x[BULq];15-15,x-x[BULq];23-24,1268-1267[UP3]	..(((((((-(((-((((((((..&..)))))))).))).)))))))..	ACAUGGGUG-GUG-GUGGGGGUCA&AUAUCCCCACAUACACACCCAUAU	4	99.6661	0.517598	6	163.595	0.507526	99.6661	163.595	yes
PC-5p-39433_216	TRINITY_DN113962_c2_g1	317	339	330	-42.5	-28	0.658824	12	4-8,336-332;11-14,329-326;16-24,325-317	1-3,339-337[UP5];9-10,331-330[SIL];15-15,x-x[BULq]	(((((((((-((((..(((((...&...)))))..)))).)))))))))	GUGUGGGUG-GUGUUGGGGGAGUU&AUAUCCCCACAUACACACCCAUAU	2	49.8331	0.581351	0	0	NA	49.8331	0	yes
PC-5p-39433_216	TRINITY_DN119536_c1_g1	1093	1117	1108	-42.5	-28.5	0.670588	7	1-12,1117-1106;15-18,1103-1100;19-21,1098-1096	13-14,1105-1104[SIL];x-x,1099-1099[BULt];22-24,1095-1093[UP3]	...(((.((((..((((((((((((&))))))))))))..))))-)))...	AUUUGGCGUGUUGAUGUGGGGAUGU&AUAUCCCCACAUACACAC-CCAUAU	0	0	NA	3	81.7974	0.254023	0	81.7974	yes
PC-5p-39433_216	TRINITY_DN122323_c2_g1	225	250	241	-42.5	-30.1	0.708235	12.5	3-10,248-241;11-12,239-238;14-22,235-227	1-2,250-249[UP5];x-x,240-240[BULt];13-13,237-236[AILt];23-24,226-225[UP3]	..(((((((((..((.((((((((..&..))))))))-))-.)))))))))..	UGGUGGGUGUGAGGUCGUGGGGGUUG&AUAUCCCCAC-AU-ACACACCCAUAU	0	0	NA	1	27.2658	0.383489	0	27.2658	yes
PC-5p-39433_216	TRINITY_DN87758_c1_g1	519	555	539	-42.5	-27.8	0.654118	22.5	2-7,554-549;8-15,541-534;16-24,527-519	1-1,555-555[UP5];x-x,548-542[BULt];x-x,533-528[BULt]	(((((((((......((((((((.......((((((.&.))))))-------))))))))------)))))))))	GUAUGGGUGGGUAUAUGUGUGUGCCCACGUGGGAUAC&AUAUCCC-------CACAUACA------CACCCAUAU	0	0	NA	1	27.2658	0.765673	0	27.2658	yes
PC-5p-410396_10	TRINITY_DN121159_c2_g3	637	661	651	-43.8	-28.6	0.652968	8.5	1-5,661-657;6-6,655-655;9-22,652-639	x-x,656-656[BULt];7-8,654-653[SIL];23-24,638-637[UP3]	..((((((((((((((..(.(((((&)))))-)..))))))))))))))..	ACUUCCUUCUUAUCUUCAGACCCCU&AGGGG-CACAAGAUAAGAAGGGAAA	0	0	NA	1	27.2658	0.298615	0	27.2658	yes
PC-5p-410396_10	TRINITY_DN121957_c1_g1	371	393	384	-43.8	-28.68	0.654795	9	1-12,393-382;19-21,376-374	13-18,381-377[AILq];22-24,373-371[UP3]	...(((.....-((((((((((((&))))))))))))......)))...	UAACCCGAACU-UCUUGUGCCCCU&AGGGGCACAAGAUAAGAAGGGAAA	0	0	NA	2	54.5316	0.178607	0	54.5316	yes
PC-5p-428679_10	TRINITY_DN104159_c0_g1	255	276	267	-36.4	-25.7	0.706044	8.5	2-11,275-266;14-19,263-258	1-1,276-276[UP5];12-13,265-264[SIL];20-22,257-255[UP3]	...((((((..((((((((((.&.))))))))))..))))))...	CGUGGACGUAUUCGACGCCGUG&AACGGCGUCGAUGAUGUUUUUC	1	24.9165	0.63811	0	0	NA	24.9165	0	yes
PC-5p-428679_10	TRINITY_DN104666_c0_g1	244	271	262	-36.4	-24	0.659341	17.5	2-4,270-268;6-11,266-261;12-22,254-244	1-1,271-271[UP5];5-5,267-267[SIL];x-x,260-255[BULt]	(((((((((((......((((((.(((.&.))).))))))------)))))))))))	GAAGAACAUCGUGUUAUUCGAUGGCGUA&AACGGCGUCGA------UGAUGUUUUUC	1	24.9165	0.985246	0	0	NA	24.9165	0	yes
PC-5p-428679_10	TRINITY_DN109269_c0_g1	611	631	622	-36.4	-24.3	0.667582	9	4-13,628-619;15-22,618-611	1-3,631-629[UP5];14-14,x-x[BULq]	((((((((-((((((((((...&...)))))))))).))))))))	GGAGAACA-CAUUGAUGCCAAA&AACGGCGUCGAUGAUGUUUUUC	1	24.9165	0.96493	1	27.2658	0.943291	24.9165	27.2658	yes
PC-5p-428679_10	TRINITY_DN109572_c0_g1	1484	1507	1496	-36.4	-24.4	0.67033	9	2-9,1506-1499;10-22,1496-1484	1-1,1507-1507[UP5];x-x,1498-1497[BULt]	(((((((((((((..((((((((.&.))))))))--)))))))))))))	GAAAGACAUUGUUUGGACGUCGUC&AACGGCGUC--GAUGAUGUUUUUC	1	24.9165	0.950787	0	0	NA	24.9165	0	yes
PC-5p-428679_10	TRINITY_DN110298_c0_g3	770	798	782	-36.4	-25.7	0.706044	19.5	3-9,796-790;10-22,782-770	1-2,798-797[UP5];x-x,789-783[BULt]	(((((((((((((.......(((((((..&..)))))))-------)))))))))))))	GGAGAACGUCAUCCUAUAGUGACGCUGAU&AACGGCGUC-------GAUGAUGUUUUUC	1	24.9165	0.624227	3	81.7974	0.400441	24.9165	81.7974	yes
PC-5p-428679_10	TRINITY_DN110445_c0_g2	399	426	411	-36.4	-23.8	0.653846	20	4-8,423-419;9-22,412-399	1-3,426-424[UP5];x-x,418-413[BULt]	((((((((((((((......(((((...&...)))))------))))))))))))))	GGGAAGCAUUAUCGGGGUGUGCGCCAAA&AACGGCGU------CGAUGAUGUUUUUC	0	0	NA	5	136.329	0.0735169	0	136.329	yes
PC-5p-428679_10	TRINITY_DN118150_c1_g1	258	278	270	-36.4	-25.9	0.711538	6.5	1-8,278-271;10-21,270-259	9-9,x-x[BULq];22-22,258-258[UP3]	.((((((((((((-((((((((&)))))))).)))))))))))).	CGAAGACGUCGUU-ACGCCGUU&AACGGCGUCGAUGAUGUUUUUC	0	0	NA	1	27.2658	0.491937	0	27.2658	yes
PC-5p-428679_10	TRINITY_DN120929_c0_g1	598	619	610	-36.4	-24.2	0.664835	9	4-14,616-606;16-22,604-598	1-3,619-617[UP5];15-15,605-605[SIL]	(((((((.(((((((((((...&...))))))))))).)))))))	GAAGAAUCUCAUUGAUGCCAAG&AACGGCGUCGAUGAUGUUUUUC	6	149.499	0.856861	0	0	NA	149.499	0	yes
PC-5p-428679_10	TRINITY_DN120998_c0_g1	778	803	794	-36.4	-25.6	0.703297	8.5	1-14,803-790;15-22,785-778	x-x,789-786[BULt]	((((((((....((((((((((((((&))))))))))))))----))))))))	GAAGAACAGAACUCGUUGAUGUCGUU&AACGGCGUCGAUGA----UGUUUUUC	1	24.9165	0.688699	0	0	NA	24.9165	0	yes
PC-5p-428679_10	TRINITY_DN124682_c3_g1	882	905	896	-36.4	-23.78	0.653297	13	1-10,905-896;13-22,891-882	11-12,895-892[AILt]	((((((((((....((((((((((&))))))))))--..))))))))))	GGGAGACGUCUUCGUGAUGCUGUU&AACGGCGUCG--AUGAUGUUUUUC	1	24.9165	0.993051	0	0	NA	24.9165	0	yes
PC-5p-428679_10	TRINITY_DN125125_c2_g1	220	241	232	-36.4	-25.1	0.68956	9	5-18,237-224;20-22,222-220	1-4,241-238[UP5];19-19,223-223[SIL]	(((.((((((((((((((....&....)))))))))))))).)))	GAACAACAUCAUCGAUGCAGGA&AACGGCGUCGAUGAUGUUUUUC	2	49.8331	0.334675	2	54.5316	0.358392	49.8331	54.5316	yes
PC-5p-428679_10	TRINITY_DN98078_c4_g1	302	322	313	-36.4	-24.4	0.67033	7.5	2-10,321-313;12-20,312-304	1-1,322-322[UP5];11-11,x-x[BULq];21-22,303-302[UP3]	..(((((((((-(((((((((.&.))))))))).)))))))))..	CCAGAACAUCA-CGAUGCUGUG&AACGGCGUCGAUGAUGUUUUUC	0	0	NA	1	27.2658	0.931187	0	27.2658	yes
PC-5p-428679_10	TRINITY_DN98496_c0_g7	32	52	43	-36.4	-25.1	0.68956	6	2-13,51-40;15-22,39-32	1-1,52-52[UP5];14-14,x-x[BULq]	((((((((-((((((((((((.&.)))))))))))).))))))))	GGAAGGCA-UAUCGAUGCUGUC&AACGGCGUCGAUGAUGUUUUUC	0	0	NA	1	27.2658	0.81302	0	27.2658	yes
PC-5p-428679_10	TRINITY_DN98496_c1_g1	1528	1548	1539	-36.4	-24.5	0.673077	5.5	1-13,1548-1536;15-22,1535-1528	14-14,x-x[BULq]	((((((((-(((((((((((((&))))))))))))).))))))))	GGAAGACA-UAUUGAUGCUGUU&AACGGCGUCGAUGAUGUUUUUC	3	74.7496	0.785394	3	81.7974	0.775826	74.7496	81.7974	yes
PC-5p-428679_10	TRINITY_DN98775_c2_g2	632	653	644	-36.4	-25.1	0.68956	7.5	1-21,653-633	22-22,632-632[UP3]	.(((((((((((((((((((((&))))))))))))))))))))).	CGAGGAUGUCGUUGAUGUCGUU&AACGGCGUCGAUGAUGUUUUUC	0	0	NA	1	27.2658	0.794028	0	27.2658	yes
PC-5p-45203_189	TRINITY_DN101184_c1_g3	405	428	419	-39.1	-26.8	0.685422	8.5	1-4,428-425;6-13,423-416;16-21,413-408	5-5,424-424[SIL];14-15,415-414[SIL];22-24,407-405[UP3]	...((((((..((((((((.((((&)))).))))))))..))))))...	UAAUGCAGGCAAGGGACCAUACGU&AUGUUUGGUCCCUAAUCUGCAAUU	1	24.9165	0.664357	0	0	NA	24.9165	0	yes
PC-5p-45203_189	TRINITY_DN102116_c1_g1	522	548	539	-39.1	-26	0.664962	13	3-7,546-542;9-14,540-535;15-21,531-525	1-2,548-547[UP5];8-8,541-541[SIL];x-x,534-532[BULt];22-24,524-522[UP3]	...(((((((...((((((.(((((..&..))))).))))))---)))))))...	GAAUGCAGAUACUUAGGGAGCGAGCUG&AUGUUUGGUCCCUA---AUCUGCAAUU	2	49.8331	0.597967	0	0	NA	49.8331	0	yes
PC-5p-45203_189	TRINITY_DN103036_c3_g1	580	604	595	-39.1	-25.7	0.657289	12	3-14,602-591;17-21,587-583	1-2,604-603[UP5];15-16,590-588[AILt];22-24,582-580[UP3]	...(((((...((((((((((((..&..))))))))))))-..)))))...	AACUGUAGCCAUGGGGACCGAGCGC&AUGUUUGGUCCCUA-AUCUGCAAUU	0	0	NA	1	27.2658	0.81302	0	27.2658	yes
PC-5p-45203_189	TRINITY_DN112186_c0_g1	1249	1271	1262	-39.1	-26.9	0.68798	9	2-2,1270-1270;4-12,1268-1260;14-22,1259-1251	1-1,1271-1271[UP5];3-3,1269-1269[SIL];13-13,x-x[BULq];23-24,1250-1249[UP3]	..(((((((((-(((((((((.(.&.).))))))))).)))))))))..	CCUUGCGGGUU-GGGACCAGGGAG&AUGUUUGGUCCCUAAUCUGCAAUU	0	0	NA	1	27.2658	0.553418	0	27.2658	yes
PC-5p-45203_189	TRINITY_DN113396_c0_g2	411	434	425	-39.1	-25.6	0.654731	15.5	7-13,428-422;16-24,419-411	1-6,434-429[UP5];14-15,421-420[SIL]	(((((((((..(((((((......&......)))))))..)))))))))	GGUUGCAGAAAGGGGGCCUUGGAG&AUGUUUGGUCCCUAAUCUGCAAUU	0	0	NA	3	81.7974	0.68678	0	81.7974	yes
PC-5p-45203_189	TRINITY_DN121415_c0_g2	2156	2178	2170	-39.1	-26.4	0.675192	10.5	3-8,2176-2171;10-22,2170-2158	1-2,2178-2177[UP5];9-9,x-x[BULq];23-24,2157-2156[UP3]	..(((((((((((((-((((((..&..)))))).)))))))))))))..	GCUUGCGGAUUAGGG-UCAGAUGG&AUGUUUGGUCCCUAAUCUGCAAUU	2	49.8331	0.50773	2	54.5316	0.254023	49.8331	54.5316	yes
PC-5p-45203_189	TRINITY_DN124212_c1_g3	35	58	49	-39.1	-27.8	0.710997	10	4-22,55-37	1-3,58-56[UP5];23-24,36-35[UP3]	..(((((((((((((((((((...&...)))))))))))))))))))..	AUUUGUAGAUUGGGGACUGAAAUG&AUGUUUGGUCCCUAAUCUGCAAUU	1	24.9165	0.363481	2	54.5316	0.210302	24.9165	54.5316	yes
PC-5p-45203_189	TRINITY_DN87386_c2_g1	422	445	436	-39.1	-28.1	0.71867	10	3-17,443-429;19-21,427-425	1-2,445-444[UP5];18-18,428-428[SIL];22-24,424-422[UP3]	...(((.(((((((((((((((..&..))))))))))))))).)))...	GAAUGUCGGUUAGGGGCCAGACUU&AUGUUUGGUCCCUAAUCUGCAAUU	1	24.9165	0.287379	0	0	NA	24.9165	0	yes
PC-5p-45203_189	TRINITY_DN93386_c0_g1	69	93	84	-39.1	-25.5	0.652174	13.5	3-12,91-82;15-21,78-72	1-2,93-92[UP5];13-14,81-79[AILt];22-24,71-69[UP3]	...(((((((...((((((((((..&..))))))))))-..)))))))...	GGAUGCAGGUGAUGGGACUGAGCUA&AUGUUUGGUCCC-UAAUCUGCAAUU	1	24.9165	0.906672	0	0	NA	24.9165	0	yes
PC-5p-45203_189	TRINITY_DN98340_c1_g2	169	197	187	-39.1	-26.8	0.685422	11	2-8,196-190;9-17,188-180;18-21,175-172	1-1,197-197[UP5];x-x,189-189[BULt];x-x,179-176[BULt];22-24,171-169[UP3]	...((((....(((((((((.(((((((.&.)))))))-)))))))))----))))...	CCAUGCAAUUUGAUUAGGGAUCCAGACAA&AUGUUUGG-UCCCUAAUC----UGCAAUU	1	24.9165	0.688699	0	0	NA	24.9165	0	yes
PC-5p-463190_8	TRINITY_DN101053_c0_g1	998	1019	1011	-42.9	-28.1	0.655012	8.5	2-9,1018-1011;12-24,1010-998	1-1,1019-1019[UP5];10-11,x-x[BULq]	(((((((((((((--((((((((.&.))))))))..)))))))))))))	GGCUGUGACUUCC--AUAUGGACG&AGUUCGUAUGAGGAAGUUAUGGCC	0	0	NA	1	27.2658	0.298615	0	27.2658	yes
PC-5p-4886_1313	TRINITY_DN100614_c1_g6	345	365	356	-30.6	-21.6	0.705882	12.5	5-19,361-347	1-4,365-362[UP5];20-21,346-345[UP3]	..(((((((((((((((....&....)))))))))))))))..	CACUCAAGAUGGGCCAUGCUU&UUUUGUGGCUUAUUUUGAGAC	5	124.583	0.643076	4	109.063	0.674373	124.583	109.063	yes
PC-5p-4886_1313	TRINITY_DN101977_c0_g4	227	247	238	-30.6	-20.4	0.666667	6.5	1-17,247-231	18-21,230-227[UP3]	....(((((((((((((((((&)))))))))))))))))....	AACACAGAAUAAGCCAUGAAA&UUUUGUGGCUUAUUUUGAGAC	1	24.9165	0.999999	0	0	NA	24.9165	0	yes
PC-5p-4886_1313	TRINITY_DN102322_c1_g2	180	200	191	-30.6	-21	0.686275	11	5-20,196-181	1-4,200-197[UP5];21-21,180-180[UP3]	.((((((((((((((((....&....)))))))))))))))).	UUUUCAGAAUGAGCCAUCUGG&UUUUGUGGCUUAUUUUGAGAC	0	0	NA	6	163.595	0.988049	0	163.595	yes
PC-5p-4886_1313	TRINITY_DN102649_c0_g1	13	33	24	-30.6	-21.3	0.696078	7.5	1-8,33-26;10-19,24-15	9-9,25-25[SIL];20-21,14-13[UP3]	..((((((((((.((((((((&)))))))).))))))))))..	UCCUCAAAGUGAUCCGCAAGA&UUUUGUGGCUUAUUUUGAGAC	2	49.8331	0.743552	0	0	NA	49.8331	0	yes
PC-5p-4886_1313	TRINITY_DN103171_c0_g1	237	257	248	-30.6	-20.08	0.656209	9	2-10,256-248;14-21,244-237	1-1,257-257[UP5];11-13,247-245[SIL]	((((((((...(((((((((.&.)))))))))...))))))))	GUCUCAGGCUCAGUCACAGAC&UUUUGUGGCUUAUUUUGAGAC	1	24.9165	1	1	27.2658	0.999999	24.9165	27.2658	yes
PC-5p-4886_1313	TRINITY_DN103720_c2_g5	1010	1030	1021	-30.6	-20.08	0.656209	10.5	1-11,1030-1020;15-21,1016-1010	12-14,1019-1017[SIL]	(((((((...(((((((((((&)))))))))))...)))))))	GUUUCGGUGCGGGCCGCGAGA&UUUUGUGGCUUAUUUUGAGAC	0	0	NA	1	27.2658	0.999999	0	27.2658	yes
PC-5p-4886_1313	TRINITY_DN106714_c1_g4	85	114	105	-30.6	-21	0.686275	26.5	5-12,110-103;13-21,93-85	1-4,114-111[UP5];x-x,102-94[BULt]	(((((((((.........((((((((....&....))))))))---------)))))))))	GUCUCAGAAGAAAAUCUCUGAGCCACGUAU&UUUUGUGGCUUA---------UUUUGAGAC	1	24.9165	0.999813	0	0	NA	24.9165	0	yes
PC-5p-4886_1313	TRINITY_DN107405_c3_g2	230	250	241	-30.6	-20.7	0.676471	12	5-18,246-233	1-4,250-247[UP5];19-21,232-230[UP3]	...((((((((((((((....&....))))))))))))))...	UGAUCAAGGUGAGCCACUUGG&UUUUGUGGCUUAUUUUGAGAC	28	697.663	0.997007	4	109.063	0.996471	697.663	109.063	yes
PC-5p-4886_1313	TRINITY_DN107878_c3_g2	189	212	202	-30.6	-20.9	0.683007	11	4-8,209-205;9-10,203-202;11-21,199-189	1-3,212-210[UP5];x-x,204-204[BULt];x-x,201-200[BULt]	(((((((((((..((.(((((...&...)))))-))--)))))))))))	GUCUCAAAAUAAUAGUCCACAUUU&UUUUGUGG-CU--UAUUUUGAGAC	2	49.8331	0.184006	0	0	NA	49.8331	0	yes
PC-5p-4886_1313	TRINITY_DN108301_c1_g4	335	355	346	-30.6	-21.1	0.689542	13	5-19,351-337	1-4,355-352[UP5];20-21,336-335[UP3]	..(((((((((((((((....&....)))))))))))))))..	CACUCAAGGUGGGCCAUGCUU&UUUUGUGGCUUAUUUUGAGAC	1	24.9165	0.999683	0	0	NA	24.9165	0	yes
PC-5p-4886_1313	TRINITY_DN109358_c3_g2	1860	1880	1871	-30.6	-20	0.653595	7.5	1-4,1880-1877;7-14,1874-1867;16-21,1865-1860	5-6,1876-1875[SIL];15-15,1866-1866[SIL]	((((((.((((((((..((((&))))..)))))))).))))))	GUCUCAUGAUAAGCUGAAAGA&UUUUGUGGCUUAUUUUGAGAC	2	49.8331	0.968562	1	27.2658	1	49.8331	27.2658	yes
PC-5p-4886_1313	TRINITY_DN110246_c0_g3	1795	1817	1808	-30.6	-20.4	0.666667	11.5	4-15,1814-1803;16-21,1800-1795	1-3,1817-1815[UP5];x-x,1802-1801[BULt]	((((((..((((((((((((...&...))))))))))))--))))))	GUCUCGCUAAAUGGGCUACGCCC&UUUUGUGGCUUAUUU--UGAGAC	1	24.9165	0.999998	0	0	NA	24.9165	0	yes
PC-5p-4886_1313	TRINITY_DN111978_c0_g2	1286	1306	1297	-30.6	-21.5	0.702614	7	1-9,1306-1298;11-19,1296-1288	10-10,1297-1297[SIL];20-21,1287-1286[UP3]	..(((((((((.(((((((((&))))))))).)))))))))..	CCUUCAAGAUAUGCCGCAGAA&UUUUGUGGCUUAUUUUGAGAC	1	24.9165	0.994456	0	0	NA	24.9165	0	yes
PC-5p-4886_1313	TRINITY_DN112889_c0_g1	610	630	621	-30.6	-20.6	0.673203	11.5	5-16,626-615;18-19,613-612	1-4,630-627[UP5];17-17,614-614[SIL];20-21,611-610[UP3]	..((.((((((((((((....&....)))))))))))).))..	UCCUGAAGAUAGGCCACGUGG&UUUUGUGGCUUAUUUUGAGAC	1	24.9165	0.99999	0	0	NA	24.9165	0	yes
PC-5p-4886_1313	TRINITY_DN113509_c3_g4	140	166	157	-30.6	-21.8	0.712418	11.5	1-13,166-154;14-21,147-140	x-x,153-148[BULt]	((((((((......(((((((((((((&)))))))))))))------))))))))	GUUUCGAAUUUGCUGUGGGCCGCGAAA&UUUUGUGGCUUAU------UUUGAGAC	1	24.9165	0.989486	0	0	NA	24.9165	0	yes
PC-5p-4886_1313	TRINITY_DN114954_c1_g4	176	195	186	-30.6	-22.2	0.72549	10.5	5-11,191-185;13-21,184-176	1-4,195-192[UP5];12-12,x-x[BULq]	(((((((((-(((((((....&....))))))).)))))))))	GUCUCAAAG-AAGCCGCCUUU&UUUUGUGGCUUAUUUUGAGAC	2	49.8331	0.870644	0	0	NA	49.8331	0	yes
PC-5p-4886_1313	TRINITY_DN116335_c1_g2	910	933	924	-30.6	-20	0.653595	14.5	5-10,929-924;11-20,920-911	1-4,933-930[UP5];x-x,923-921[BULt];21-21,910-910[UP3]	.((((((((((...((((((....&....))))))---)))))))))).	UUCUCAGAAUAUUAAGCCACCCCC&UUUUGUGGCU---UAUUUUGAGAC	0	0	NA	2	54.5316	0.999836	0	54.5316	yes
PC-5p-4886_1313	TRINITY_DN116971_c1_g1	133	153	144	-30.6	-20.6	0.673203	6	1-6,153-148;8-20,146-134	7-7,147-147[SIL];21-21,133-133[UP3]	.(((((((((((((.((((((&)))))).))))))))))))).	CUCUCGAAGUGAGCAAUAAAA&UUUUGUGGCUUAUUUUGAGAC	4	99.6661	0.998122	0	0	NA	99.6661	0	yes
PC-5p-4886_1313	TRINITY_DN116974_c1_g1	1237	1259	1248	-30.6	-20	0.653595	7	2-7,1258-1253;8-14,1250-1244;16-21,1242-1237	1-1,1259-1259[UP5];x-x,1252-1251[BULt];15-15,1243-1243[SIL]	((((((.(((((((..((((((.&.))))))--))))))).))))))	GUCUCACAAUAAGUCUCACAAAU&UUUUGUG--GCUUAUUUUGAGAC	1	24.9165	1	0	0	NA	24.9165	0	yes
PC-5p-4886_1313	TRINITY_DN117327_c0_g1	406	425	416	-30.6	-20	0.653595	6.5	2-16,424-410;19-21,408-406	1-1,425-425[UP5];17-18,409-409[AILq]	(((.-(((((((((((((((.&.)))))))))))))))..)))	GUUG-AGGAUAAGCCGCAAGC&UUUUGUGGCUUAUUUUGAGAC	2	49.8331	0.999919	1	27.2658	1	49.8331	27.2658	yes
PC-5p-4886_1313	TRINITY_DN117880_c1_g1	1400	1424	1415	-30.6	-22	0.718954	14.5	1-4,1424-1421;6-10,1419-1415;11-21,1410-1400	5-5,1420-1420[SIL];x-x,1414-1411[BULt]	(((((((((((....(((((.((((&)))).)))))----)))))))))))	GUCUCAAGAUAUGGAAGCCGGGGGA&UUUUGUGGCU----UAUUUUGAGAC	1	24.9165	0.987309	0	0	NA	24.9165	0	yes
PC-5p-4886_1313	TRINITY_DN118135_c4_g1	240	260	251	-30.6	-19.98	0.652941	9	4-13,257-248;17-20,244-241	1-3,260-258[UP5];14-16,247-245[SIL];21-21,240-240[UP3]	.((((...((((((((((...&...))))))))))...)))).	UUCUCUAUAUAAGCCACAUGA&UUUUGUGGCUUAUUUUGAGAC	2	49.8331	0.973454	0	0	NA	49.8331	0	yes
PC-5p-4886_1313	TRINITY_DN118901_c0_g1	4506	4526	4517	-30.6	-20.3	0.663399	8	1-16,4526-4511	17-21,4510-4506[UP3]	.....((((((((((((((((&)))))))))))))))).....	CCAGGAGGAUAGGCCACAAGA&UUUUGUGGCUUAUUUUGAGAC	1	24.9165	0.999999	0	0	NA	24.9165	0	yes
PC-5p-4886_1313	TRINITY_DN119449_c0_g1	2453	2476	2467	-30.6	-20.1	0.656863	8.5	1-15,2476-2462;16-19,2458-2455	x-x,2461-2459[BULt];20-21,2454-2453[UP3]	..((((...(((((((((((((((&)))))))))))))))---))))..	UACUCAGCUAAAUGAGCUACAGAG&UUUUGUGGCUUAUUU---UGAGAC	0	0	NA	1	27.2658	0.999999	0	27.2658	yes
PC-5p-4886_1313	TRINITY_DN119616_c2_g2	225	246	237	-30.6	-20.4	0.666667	8	1-12,246-235;15-20,231-226	13-14,234-232[AILt];21-21,225-225[UP3]	.((((((...((((((((((((&))))))))))))-..)))))).	UUCUUAGCGUUGAGCCACAAGA&UUUUGUGGCUUA-UUUUGAGAC	1	24.9165	0.999998	0	0	NA	24.9165	0	yes
PC-5p-4886_1313	TRINITY_DN119855_c0_g2	561	582	572	-30.6	-20.7	0.676471	9.5	1-4,582-579;6-9,577-574;11-21,571-561	5-5,578-578[SIL];10-10,573-572[AILt]	(((((((((((..((((.((((&)))).))))-.)))))))))))	GUUUCAAGAUGCUGCCAGGAAG&UUUUGUGGC-UUAUUUUGAGAC	3	74.7496	0.997295	1	27.2658	0.999919	74.7496	27.2658	yes
PC-5p-4886_1313	TRINITY_DN119886_c0_g1	531	551	542	-30.6	-20.2	0.660131	10.5	4-10,548-542;12-19,540-533	1-3,551-549[UP5];11-11,541-541[SIL];20-21,532-531[UP3]	..((((((((.(((((((...&...))))))).))))))))..	CACUCGGAGUCAGCCACACAA&UUUUGUGGCUUAUUUUGAGAC	2	49.8331	0.999621	0	0	NA	49.8331	0	yes
PC-5p-4886_1313	TRINITY_DN120041_c1_g1	1337	1357	1348	-30.6	-21.5	0.702614	8.5	1-10,1357-1348;13-19,1345-1339	11-12,1347-1346[SIL];20-21,1338-1337[UP3]	..(((((((..((((((((((&))))))))))..)))))))..	AACUCAAAAGUAGCCAUAGAG&UUUUGUGGCUUAUUUUGAGAC	0	0	NA	1	27.2658	0.987542	0	27.2658	yes
PC-5p-4886_1313	TRINITY_DN120445_c0_g2	349	370	360	-30.6	-19.9	0.650327	12.5	5-8,366-363;9-9,361-361;11-21,359-349	1-4,370-367[UP5];x-x,362-362[BULt];10-10,360-360[SIL]	(((((((((((.(.((((....&....))))-).)))))))))))	GUCUCAAGAUGUGACCACCUUU&UUUUGUGG-CUUAUUUUGAGAC	1	24.9165	1	0	0	NA	24.9165	0	yes
PC-5p-4886_1313	TRINITY_DN122362_c0_g1	291	309	301	-30.6	-19.9	0.650327	9	2-9,308-301;12-21,300-291	1-1,309-309[UP5];10-11,x-x[BULq]	((((((((((--((((((((.&.))))))))..))))))))))	GUCUCAAGGU--GCUGCAGAC&UUUUGUGGCUUAUUUUGAGAC	2	49.8331	0.999959	0	0	NA	49.8331	0	yes
PC-5p-4886_1313	TRINITY_DN123257_c1_g1	435	460	451	-30.6	-20.2	0.660131	11	1-5,460-456;7-16,454-445;17-21,439-435	6-6,455-455[SIL];x-x,444-440[BULt]	(((((.....((((((((((.(((((&))))).))))))))))-----)))))	GUCUCCUGCAAGAGUGGGCCCCAAGA&UUUUGUGGCUUAUUUU-----GAGAC	1	24.9165	1	0	0	NA	24.9165	0	yes
PC-5p-4886_1313	TRINITY_DN123331_c2_g3	368	388	379	-30.6	-21.3	0.696078	7.5	1-8,388-381;10-19,379-370	9-9,380-380[SIL];20-21,369-368[UP3]	..((((((((((.((((((((&)))))))).))))))))))..	UCCUCAAAGUGAUCCGCAAGA&UUUUGUGGCUUAUUUUGAGAC	10	249.165	0.972796	0	0	NA	249.165	0	yes
PC-5p-4886_1313	TRINITY_DN124706_c1_g2	205	225	216	-30.6	-21.3	0.696078	6	2-19,224-207	1-1,225-225[UP5];20-21,206-205[UP3]	..((((((((((((((((((.&.))))))))))))))))))..	GCUUCAGGGUAAGUCACAAAU&UUUUGUGGCUUAUUUUGAGAC	2	49.8331	0.969281	0	0	NA	49.8331	0	yes
PC-5p-4886_1313	TRINITY_DN125238_c3_g2	387	407	398	-30.6	-21	0.686275	11	5-20,403-388	1-4,407-404[UP5];21-21,387-387[UP3]	.((((((((((((((((....&....)))))))))))))))).	UUUUCAGAAUGAGCCAUCUCG&UUUUGUGGCUUAUUUUGAGAC	6	149.499	0.990699	8	218.126	0.98938	149.499	218.126	yes
PC-5p-4886_1313	TRINITY_DN89012_c0_g1	110	129	120	-30.6	-20.7	0.676471	6	1-16,129-114;18-19,113-112	17-17,x-x[BULq];20-21,111-110[UP3]	..((-((((((((((((((((&)))))))))))))))).))..	GGCU-GGAAUGAGCCACAGAA&UUUUGUGGCUUAUUUUGAGAC	4	99.6661	0.996946	1	27.2658	0.999901	99.6661	27.2658	yes
PC-5p-4886_1313	TRINITY_DN92500_c0_g1	113	130	121	-30.6	-20.2	0.660131	8.5	1-4,130-127;6-13,125-118;17-21,117-113	5-5,126-126[SIL];14-16,x-x[BULq]	(((((---((((((((.((((&)))).))))))))...)))))	GUCUC---GUGGGCCAGGAAA&UUUUGUGGCUUAUUUUGAGAC	1	24.9165	1	0	0	NA	24.9165	0	yes
PC-5p-4886_1313	TRINITY_DN93202_c1_g3	57	77	68	-30.6	-21.9	0.715686	9.5	5-20,73-58	1-4,77-74[UP5];21-21,57-57[UP3]	.((((((((((((((((....&....)))))))))))))))).	UUCUUGAAGUAAGCCACCGCU&UUUUGUGGCUUAUUUUGAGAC	1	24.9165	0.988229	0	0	NA	24.9165	0	yes
PC-5p-4886_1313	TRINITY_DN93491_c0_g4	478	499	490	-30.6	-21	0.686275	7	1-6,499-494;8-16,492-484;17-21,482-478	7-7,493-493[SIL];x-x,483-483[BULt]	(((((.(((((((((.((((((&)))))).)))))))))-)))))	GUCUCAAAAAUGAGUGAUAAGA&UUUUGUGGCUUAUUUU-GAGAC	0	0	NA	1	27.2658	0.999504	0	27.2658	yes
PC-5p-4886_1313	TRINITY_DN94793_c1_g1	874	894	885	-30.6	-20.6	0.673203	7	1-14,894-881;17-20,878-875	15-16,880-879[SIL];21-21,874-874[UP3]	.((((..((((((((((((((&))))))))))))))..)))).	UUCUCUUGAUAAGUCGCAAGG&UUUUGUGGCUUAUUUUGAGAC	0	0	NA	1	27.2658	0.99995	0	27.2658	yes
PC-5p-4886_1313	TRINITY_DN97554_c0_g1	1234	1250	1241	-30.6	-22.1	0.722222	6.5	1-11,1250-1240;16-21,1239-1234	12-15,x-x[BULq]	((((((----(((((((((((&)))))))))))....))))))	GUCUCG----GAGCCACAAAA&UUUUGUGGCUUAUUUUGAGAC	1	24.9165	0.980061	0	0	NA	24.9165	0	yes
PC-5p-4886_1313	TRINITY_DN98020_c0_g1	1447	1469	1459	-30.6	-19.9	0.650327	8	1-7,1469-1463;8-15,1461-1454;16-19,1452-1449	x-x,1462-1462[BULt];x-x,1453-1453[BULt];20-21,1448-1447[UP3]	..((((.((((((((.(((((((&)))))))-))))))))-))))..	CCCUCAUAGAUGAGCUCGCAAAG&UUUUGUG-GCUUAUUU-UGAGAC	6	149.499	0.980482	10	272.658	0.999958	149.499	272.658	yes
PC-5p-52328_164	TRINITY_DN108042_c0_g1	33	57	48	-41.9	-32.1	0.76611	3.5	1-13,57-45;14-16,43-41;19-24,38-33	x-x,44-44[BULt];17-18,40-39[SIL]	((((((..(((.(((((((((((((&)))))))))))))-)))..))))))	GAUUCAGUUAGAAAUCCCAUGGGAU&AUCCCAUGGGAUU-CUGUAUGAAUC	0	0	NA	2	54.5316	0.0879903	0	54.5316	yes
PC-5p-52328_164	TRINITY_DN112578_c1_g1	665	692	679	-41.9	-28.7	0.684964	15	2-6,691-687;7-21,682-668	1-1,692-692[UP5];x-x,686-683[BULt];22-24,667-665[UP3]	...(((((((((((((((....(((((.&.)))))----)))))))))))))))...	UGCUCGUGCAGAGUUCCAAGACUGGGAG&AUCCCA----UGGGAUUCUGUAUGAAUC	0	0	NA	3	81.7974	0.363986	0	81.7974	yes
PC-5p-52328_164	TRINITY_DN116935_c1_g1	677	703	691	-41.9	-30.9	0.73747	12	3-6,701-698;7-11,694-690;13-24,688-677	1-2,703-702[UP5];x-x,697-695[BULt];12-12,689-689[SIL]	((((((((((((.(((((...((((..&..))))---))))).))))))))))))	GGUUCAUACGGAUUCCCAACAUGGGUU&AUCCCA---UGGGAUUCUGUAUGAAUC	1	24.9165	0.452461	1	27.2658	0.403051	24.9165	27.2658	yes
PC-5p-52328_164	TRINITY_DN122282_c1_g3	207	231	221	-41.9	-31	0.739857	9	2-4,230-228;5-9,226-222;12-24,219-207	1-1,231-231[UP5];x-x,227-227[BULt];10-11,221-220[SIL]	(((((((((((((..(((((.(((.&.)))-)))))..)))))))))))))	GGUUCGUACGGGAGACCAUGUGGAA&AUCC-CAUGGGAUUCUGUAUGAAUC	19	473.414	0.24685	46	1254.23	0.240774	473.414	1254.23	yes
PC-5p-52328_164	TRINITY_DN123824_c2_g1	209	234	223	-41.9	-31.4	0.749403	8	2-8,233-227;9-24,224-209	1-1,234-234[UP5];x-x,226-225[BULt]	((((((((((((((((..(((((((.&.)))))))--))))))))))))))))	GAUUCAUAUGGAGUCUUACAUGGGAG&AUCCCAUG--GGAUUCUGUAUGAAUC	2	49.8331	0.0951155	0	0	NA	49.8331	0	yes
PC-5p-52328_164	TRINITY_DN79770_c0_g1	162	185	176	-41.9	-28.9	0.689737	9	2-5,184-181;8-24,178-162	1-1,185-185[UP5];6-7,180-179[SIL]	(((((((((((((((((..((((.&.))))..)))))))))))))))))	GAUUUAUGCAGAAUUCUUGGGGGG&AUCCCAUGGGAUUCUGUAUGAAUC	0	0	NA	2	54.5316	0.338459	0	54.5316	yes
PC-5p-52328_164	TRINITY_DN80556_c0_g1	143	169	160	-41.9	-28.1	0.670644	11	3-18,167-152;19-23,148-144	1-2,169-168[UP5];x-x,151-149[BULt];24-24,143-143[UP3]	.(((((...((((((((((((((((..&..))))))))))))))))---))))).	AGUUCGGUUUACAGAGUCUCGUGGGCA&AUCCCAUGGGAUUCUGUA---UGAAUC	3	74.7496	0.0213838	3	81.7974	0.0197104	74.7496	81.7974	yes
PC-5p-52328_164	TRINITY_DN97815_c1_g1	1263	1285	1276	-41.9	-31.7	0.756563	8.5	4-17,1282-1269;19-24,1268-1263	1-3,1285-1283[UP5];18-18,x-x[BULq]	((((((-((((((((((((((...&...)))))))))))))).))))))	GAUUCA-ACGGAGUCCCGUGGAAA&AUCCCAUGGGAUUCUGUAUGAAUC	1	24.9165	0.363481	0	0	NA	24.9165	0	yes
PC-5p-547078_6	TRINITY_DN106304_c0_g3	1300	1322	1313	-33.3	-21.7	0.651652	11	5-16,1318-1307;18-21,1303-1300	1-4,1322-1319[UP5];17-17,1306-1304[AILt]	((((...((((((((((((....&....))))))))))))--.))))	GAUUGAGGAGCCGUUGGAUAAUC&UCAAAUCCAAUGGCUC--AAAUC	0	0	NA	1	27.2658	0.971188	0	27.2658	yes
PC-5p-547078_6	TRINITY_DN113042_c3_g2	301	320	311	-33.3	-24.5	0.735736	4	1-3,320-318;5-16,316-305;19-21,303-301	4-4,317-317[SIL];17-18,304-304[AILq]	(((.-((((((((((((.(((&))).))))))))))))..)))	GAUA-GAGCCAUUGGAUGUGA&UCAAAUCCAAUGGCUCAAAUC	1	24.9165	0.47269	0	0	NA	24.9165	0	yes
PC-5p-547078_6	TRINITY_DN113864_c0_g1	618	639	629	-33.3	-22.1	0.663664	10	1-3,639-637;6-10,633-629;13-21,626-618	4-5,636-634[AILt];11-12,628-627[SIL]	(((((((((..(((((...(((&)))-..)))))..)))))))))	GAUUUGAGCGUUUGGAGUAUGA&UCA-AAUCCAAUGGCUCAAAUC	0	0	NA	5	136.329	0.796829	0	136.329	yes
PC-5p-547078_6	TRINITY_DN114263_c0_g1	802	822	813	-33.3	-21.7	0.651652	7	1-10,822-813;12-18,811-805	11-11,812-812[SIL];19-21,804-802[UP3]	...(((((((.((((((((((&)))))))))).)))))))...	UAGUUGGGCUCUUGGAUUUGG&UCAAAUCCAAUGGCUCAAAUC	0	0	NA	1	27.2658	0.977739	0	27.2658	yes
PC-5p-547078_6	TRINITY_DN114654_c0_g1	274	294	285	-33.3	-23.5	0.705706	11	5-18,290-277	1-4,294-291[UP5];19-21,276-274[UP3]	...((((((((((((((....&....))))))))))))))...	AAAUUGAGCCGUUGGAUACUU&UCAAAUCCAAUGGCUCAAAUC	2	49.8331	0.212063	4	109.063	0.456615	49.8331	109.063	yes
PC-5p-547078_6	TRINITY_DN115220_c6_g1	1785	1805	1796	-33.3	-23.2	0.696697	11	5-18,1801-1788	1-4,1805-1802[UP5];19-21,1787-1785[UP3]	...((((((((((((((....&....))))))))))))))...	CUGUUGAGCCGUUGGAUCCCA&UCAAAUCCAAUGGCUCAAAUC	0	0	NA	1	27.2658	0.706336	0	27.2658	yes
PC-5p-547078_6	TRINITY_DN115661_c1_g2	81	101	92	-33.3	-21.8	0.654655	7	1-4,101-98;6-9,97-94;10-19,92-83	5-5,x-x[BULq];x-x,93-93[BULt];20-21,82-81[UP3]	..((((((((((.((((-((((&)))).))))-))))))))))..	GUUUUGAGCCAUAUGGG-UUGA&UCAAAUCCA-AUGGCUCAAAUC	0	0	NA	2	54.5316	0.577867	0	54.5316	yes
PC-5p-547078_6	TRINITY_DN115898_c1_g1	423	445	434	-33.3	-22.1	0.663664	9.5	1-5,445-441;6-16,438-428	x-x,440-439[BULt];17-21,427-423[UP3]	.....(((((((((((..(((((&)))))--))))))))))).....	CCUAGGAGCCAUUGGAGCUUUGG&UCAAA--UCCAAUGGCUCAAAUC	28	697.663	0.817489	11	299.924	0.808474	697.663	299.924	yes
PC-5p-547078_6	TRINITY_DN116321_c0_g2	1138	1158	1149	-33.3	-23.4	0.702703	8	1-16,1158-1143	17-21,1142-1138[UP3]	.....((((((((((((((((&)))))))))))))))).....	GAGACGGGUCGUUGGGUUUGA&UCAAAUCCAAUGGCUCAAAUC	0	0	NA	1	27.2658	0.676509	0	27.2658	yes
PC-5p-547078_6	TRINITY_DN117812_c0_g2	275	297	288	-33.3	-22.48	0.675075	8	1-11,297-287;13-16,285-282;19-21,277-275	12-12,286-286[SIL];17-18,281-278[AILt]	(((....((((.(((((((((((&))))))))))).))))--..)))	GGUGUAGGGGCGAUUGGGUUUGA&UCAAAUCCAAUGGCUC--AAAUC	2	49.8331	0.715055	0	0	NA	49.8331	0	yes
PC-5p-547078_6	TRINITY_DN121060_c2_g3	227	249	239	-33.3	-22.5	0.675676	5.5	1-5,249-245;6-12,243-237;13-21,235-227	x-x,244-244[BULt];x-x,236-236[BULt]	(((((((((.(((((((.(((((&)))))-)))))))-)))))))))	GAUUUGAGUGUAUUGGACUUUGA&UCAAA-UCCAAUG-GCUCAAAUC	0	0	NA	1	27.2658	0.855535	0	27.2658	yes
PC-5p-547078_6	TRINITY_DN121965_c0_g2	632	653	643	-33.3	-21.9	0.657658	13	7-9,647-645;10-21,643-632	1-6,653-648[UP5];x-x,644-644[BULt]	((((((((((((.(((......&......)))-))))))))))))	GAUUUGAGCCAUGUGGUCUAAU&UCAAAUCCA-AUGGCUCAAAUC	1	24.9165	0.973054	0	0	NA	24.9165	0	yes
PC-5p-547078_6	TRINITY_DN123151_c1_g1	1430	1450	1441	-33.3	-24.6	0.738739	9	5-9,1446-1442;11-21,1440-1430	1-4,1450-1447[UP5];10-10,1441-1441[SIL]	(((((((((((.(((((....&....))))).)))))))))))	GAUUUGAGCCACUGGAUCAAA&UCAAAUCCAAUGGCUCAAAUC	6	149.499	0.261948	0	0	NA	149.499	0	yes
PC-5p-547078_6	TRINITY_DN124208_c4_g1	602	622	613	-33.3	-24.6	0.738739	6.5	1-2,622-621;5-14,618-609;16-21,607-602	3-4,620-619[SIL];15-15,608-608[SIL]	((((((.((((((((((..((&))..)))))))))).))))))	GGUUUGUGCCGUUGGAUAGGA&UCAAAUCCAAUGGCUCAAAUC	1	24.9165	0.409645	3	81.7974	0.240774	24.9165	81.7974	yes
PC-5p-547078_6	TRINITY_DN124461_c0_g1	543	565	555	-33.3	-22.62	0.679279	7.5	1-8,565-558;9-16,556-549;20-21,544-543	x-x,557-557[BULt];17-19,548-545[AILt]	((....((((((((.((((((((&))))))))-))))))))-...))	GAGGAGGGGCCAUUGGGGUUUGA&UCAAAUCC-AAUGGCUC-AAAUC	1	24.9165	0.883022	0	0	NA	24.9165	0	yes
PC-5p-547078_6	TRINITY_DN83315_c0_g1	117	138	128	-33.3	-22.2	0.666667	8	1-4,138-135;5-17,133-121	x-x,134-134[BULt];18-21,120-117[UP3]	....(((((((((((((.((((&))))-)))))))))))))....	ACACUGAGCUGUUGGAUCUUGA&UCAA-AUCCAAUGGCUCAAAUC	0	0	NA	2	54.5316	0.784476	0	54.5316	yes
PC-5p-547078_6	TRINITY_DN92081_c2_g2	212	232	223	-33.3	-29.7	0.891892	5	4-21,229-212	1-3,232-230[UP5]	((((((((((((((((((...&...))))))))))))))))))	GAUUUGAGCCAUUGGAUUAAA&UCAAAUCCAAUGGCUCAAAUC	6	149.499	0.0200457	15	408.987	0.0194831	149.499	408.987	yes
PC-5p-547078_6	TRINITY_DN93280_c2_g2	43	63	54	-33.3	-21.7	0.651652	10	1-2,63-62;5-17,59-47	3-4,61-60[SIL];18-21,46-43[UP3]	....(((((((((((((..((&))..)))))))))))))....	CUGGUGGGCCAUUGGGUGAGG&UCAAAUCCAAUGGCUCAAAUC	19	473.414	0.599447	10	272.658	0.630796	473.414	272.658	yes
PC-5p-547078_6	TRINITY_DN93735_c4_g6	78	98	89	-33.3	-27.1	0.813814	9	5-21,94-78	1-4,98-95[UP5]	(((((((((((((((((....&....)))))))))))))))))	GGUUUGGGCCGUUGGAUAUAU&UCAAAUCCAAUGGCUCAAAUC	1	24.9165	0.171572	0	0	NA	24.9165	0	yes
PC-5p-57187_150	TRINITY_DN100075_c1_g1	1300	1326	1316	-37.7	-24.76	0.656764	10.5	1-9,1326-1318;11-17,1315-1309;21-24,1303-1300	10-10,1317-1316[AILt];18-20,1308-1304[AILt]	((((.....(((((((..(((((((((&)))))))))-.)))))))--...))))	GGACAGAAUGCAUGCACUCAAAGCAUU&AAUGUUUUG-UUGCAUGU--UUGGUCC	0	0	NA	1	27.2658	0.990374	0	27.2658	yes
PC-5p-57187_150	TRINITY_DN100271_c0_g3	1685	1709	1699	-37.7	-25.4	0.67374	12	1-9,1709-1701;12-23,1697-1686	10-11,1700-1698[AILt];24-24,1685-1685[UP3]	.((((((((((((...(((((((((&)))))))))-..)))))))))))).	UGACCAGGCAUGUUGUCGGGACAUU&AAUGUUUUG-UUGCAUGUUUGGUCC	0	0	NA	1	27.2658	0.943291	0	27.2658	yes
PC-5p-57187_150	TRINITY_DN104042_c0_g2	299	323	314	-37.7	-24.7	0.655172	14	7-19,317-305;20-24,303-299	1-6,323-318[UP5];x-x,304-304[BULt]	(((((.(((((((((((((......&......)))))))))))))-)))))	GGAUCAAAGCAUGCAGCAACUUAUG&AAUGUUUUGUUGCAUGUUU-GGUCC	1	24.9165	0.996848	0	0	NA	24.9165	0	yes
PC-5p-57187_150	TRINITY_DN104253_c2_g1	126	151	142	-37.7	-24.7	0.655172	12.5	3-10,149-142;11-22,139-128	1-2,151-150[UP5];x-x,141-140[BULt];23-24,127-126[UP3]	..((((((((((((..((((((((..&..))))))))--))))))))))))..	CAACCAAGCAUGUACUGCAGAACAGA&AAUGUUUUGU--UGCAUGUUUGGUCC	3	74.7496	0.950059	5	136.329	0.945631	74.7496	136.329	yes
PC-5p-57187_150	TRINITY_DN104958_c0_g3	264	293	284	-37.7	-24.54	0.650928	18	4-16,290-278;19-24,269-264	1-3,293-291[UP5];17-18,277-270[AILt]	((((((........(((((((((((((...&...)))))))))))))------..))))))	GGGCCGCAGUAACUCAUGCAGCAGGGCUGA&AAUGUUUUGUUGCAUG------UUUGGUCC	3	74.7496	0.969897	4	109.063	0.966755	74.7496	109.063	yes
PC-5p-57187_150	TRINITY_DN105708_c3_g3	777	809	794	-37.7	-24.8	0.657825	18.5	2-5,808-805;6-15,798-789;16-24,785-777	1-1,809-809[UP5];x-x,804-799[BULt];x-x,788-786[BULt]	(((((((((...((((((((((......((((.&.))))------))))))))))---)))))))))	GGAUCAAGCCGAGUGCAACAAACUUUCUGCAUG&AAUGU------UUUGUUGCAU---GUUUGGUCC	0	0	NA	2	54.5316	0.69291	0	54.5316	yes
PC-5p-57187_150	TRINITY_DN107206_c0_g2	1752	1776	1767	-37.7	-26.4	0.700265	10.5	4-14,1773-1763;17-24,1759-1752	1-3,1776-1774[UP5];15-16,1762-1760[AILt]	((((((((...(((((((((((...&...)))))))))))-..))))))))	GGACCAGAAGUUGCAACGGAACUGA&AAUGUUUUGUUGCA-UGUUUGGUCC	0	0	NA	1	27.2658	0.750063	0	27.2658	yes
PC-5p-57187_150	TRINITY_DN109331_c1_g3	318	343	334	-37.7	-28.1	0.745358	6.5	3-15,341-329;17-20,327-324;21-24,321-318	1-2,343-342[UP5];16-16,328-328[SIL];x-x,323-322[BULt]	((((..((((.(((((((((((((..&..))))))))))))).))))--))))	GGACAACAAAGGUGCAACAAAACAGA&AAUGUUUUGUUGCAUGUUUG--GUCC	1	24.9165	0.313707	0	0	NA	24.9165	0	yes
PC-5p-57187_150	TRINITY_DN110381_c1_g3	274	295	288	-37.7	-26.3	0.697613	11.5	2-5,294-291;8-11,290-287;13-24,285-274	1-1,295-295[UP5];6-7,x-x[BULq];12-12,286-286[SIL]	((((((((((((.((((--((((.&.))))..)))).))))))))))))	GGGCCAGGCAUGGAGCG--GCAUC&AAUGUUUUGUUGCAUGUUUGGUCC	9	224.249	0.629247	2	54.5316	0.336539	224.249	54.5316	yes
PC-5p-57187_150	TRINITY_DN110598_c0_g3	257	283	274	-37.7	-25.1	0.665782	9.5	4-14,280-270;15-17,266-264;19-24,262-257	1-3,283-281[UP5];x-x,269-267[BULt];18-18,263-263[SIL]	((((((.(((...(((((((((((...&...)))))))))))---))).))))))	GGAUCAUACACUGUGCAACAAAACUAC&AAUGUUUUGUUGCA---UGUUUGGUCC	0	0	NA	1	27.2658	0.971188	0	27.2658	yes
PC-5p-57187_150	TRINITY_DN112055_c0_g1	1489	1512	1503	-37.7	-26.6	0.70557	4.5	1-15,1512-1498;17-20,1496-1493;22-24,1491-1489	16-16,1497-1497[SIL];21-21,1492-1492[SIL]	(((.((((.(((((((((((((((&))))))))))))))).)))).)))	GGAAUGAAGGUGCAACAGAACAUU&AAUGUUUUGUUGCAUGUUUGGUCC	1	24.9165	0.711277	0	0	NA	24.9165	0	yes
PC-5p-57187_150	TRINITY_DN113434_c0_g2	2462	2485	2476	-37.7	-26.1	0.692308	12.5	4-23,2482-2463	1-3,2485-2483[UP5];24-24,2462-2462[UP3]	.((((((((((((((((((((...&...)))))))))))))))))))).	UGACUGGACAUGCAGCGGGAUUUG&AAUGUUUUGUUGCAUGUUUGGUCC	2	49.8331	0.643962	0	0	NA	49.8331	0	yes
PC-5p-57187_150	TRINITY_DN113711_c2_g2	313	341	332	-37.7	-24.72	0.655703	13	1-10,341-332;12-16,328-324;19-24,318-313	11-11,331-329[AILt];17-18,323-319[AILt]	((((((.....(((((...((((((((((&))))))))))--.)))))---..))))))	GGACCACGAAUCAUGCCACGCAAAGCAUU&AAUGUUUUGU--UGCAUG---UUUGGUCC	3	74.7496	0.1096	0	0	NA	74.7496	0	yes
PC-5p-57187_150	TRINITY_DN114004_c0_g2	644	668	659	-37.7	-24.6	0.65252	15	7-17,662-652;18-24,650-644	1-6,668-663[UP5];x-x,651-651[BULt]	(((((((.(((((((((((......&......)))))))))))-)))))))	GGACCAAGGCGUGUAACAGCUGUGU&AAUGUUUUGUUGCAUGU-UUGGUCC	0	0	NA	2	54.5316	0.958722	0	54.5316	yes
PC-5p-57187_150	TRINITY_DN114034_c0_g1	1039	1067	1056	-37.7	-24.62	0.65305	12.5	2-5,1066-1063;6-16,1060-1050;19-24,1044-1039	1-1,1067-1067[UP5];x-x,1062-1061[BULt];17-18,1049-1045[AILt]	((((((.....(((((((((((..((((.&.))))--)))))))))))---..))))))	GGAUCAUCCAUCAUGCAGCAAACAGCAUG&AAUGU--UUUGUUGCAUG---UUUGGUCC	1	24.9165	0.997578	0	0	NA	24.9165	0	yes
PC-5p-57187_150	TRINITY_DN115573_c0_g2	793	819	810	-37.7	-26.5	0.702918	8.5	2-8,818-812;10-14,810-806;15-23,802-794	1-1,819-819[UP5];9-9,811-811[SIL];x-x,805-803[BULt];24-24,793-793[UP3]	.(((((((((...(((((.(((((((.&.))))))).)))))---))))))))).	AGACCGAACAUAAUGCAAGAAGACAUG&AAUGUUUUGUUGCA---UGUUUGGUCC	2	49.8331	0.517598	1	27.2658	0.686774	49.8331	27.2658	yes
PC-5p-57187_150	TRINITY_DN115810_c2_g1	1248	1272	1263	-37.7	-24.6	0.65252	9.5	3-19,1270-1254;20-20,1252-1252;22-24,1250-1248	1-2,1272-1271[UP5];x-x,1253-1253[BULt];21-21,1251-1251[SIL]	(((.(.(((((((((((((((((..&..)))))))))))))))))-).)))	GGAGUAAGACGUGCAAUGAGACAAC&AAUGUUUUGUUGCAUGUUU-GGUCC	1	24.9165	0.998139	0	0	NA	24.9165	0	yes
PC-5p-57187_150	TRINITY_DN117842_c0_g1	904	927	918	-37.7	-25	0.66313	14	7-16,921-912;18-24,910-904	1-6,927-922[UP5];17-17,911-911[SIL]	(((((((.((((((((((......&......)))))))))).)))))))	GGACCAAUUGUGCAGCAAUCUGAU&AAUGUUUUGUUGCAUGUUUGGUCC	0	0	NA	1	27.2658	0.976257	0	27.2658	yes
PC-5p-57187_150	TRINITY_DN118064_c0_g1	960	985	976	-37.7	-26.1	0.692308	9	2-6,984-980;8-10,978-976;11-24,973-960	1-1,985-985[UP5];7-7,979-979[SIL];x-x,975-974[BULt]	((((((((((((((..(((.(((((.&.))))).)))--))))))))))))))	GGAUCAGACAUGUAUCACAUAACAUA&AAUGUUUUGU--UGCAUGUUUGGUCC	1	24.9165	0.858795	0	0	NA	24.9165	0	yes
PC-5p-57187_150	TRINITY_DN118641_c0_g1	421	447	435	-37.7	-25.62	0.679576	14.5	2-9,446-439;12-24,433-421	1-1,447-447[UP5];10-11,438-434[AILt]	(((((((((((((.....((((((((.&.))))))))---..)))))))))))))	GGAUCAGAUAUGCCAAAUCAAGGCAUG&AAUGUUUUG---UUGCAUGUUUGGUCC	1	24.9165	0.928292	0	0	NA	24.9165	0	yes
PC-5p-57187_150	TRINITY_DN119528_c1_g1	624	647	638	-37.7	-27.4	0.72679	10	1-15,647-633;17-23,631-625	16-16,632-632[SIL];24-24,624-624[UP3]	.(((((((.(((((((((((((((&))))))))))))))).))))))).	AGGCCGGAGGUGCGGCGAGAUGUU&AAUGUUUUGUUGCAUGUUUGGUCC	0	0	NA	1	27.2658	0.34242	0	27.2658	yes
PC-5p-57187_150	TRINITY_DN120372_c0_g1	690	713	703	-37.7	-24.6	0.65252	11.5	4-9,710-705;10-13,703-700;15-24,699-690	1-3,713-711[UP5];x-x,704-704[BULt];14-14,x-x[BULq]	((((((((((-((((.((((((...&...))))))-)))).))))))))))	GGAUCAAACA-GCAAUCAGGGCGGG&AAUGUUUUG-UUGCAUGUUUGGUCC	0	0	NA	1	27.2658	0.99597	0	27.2658	yes
PC-5p-57187_150	TRINITY_DN121234_c2_g2	231	256	247	-37.7	-24.68	0.654642	11.5	4-18,253-239;21-24,234-231	1-3,256-254[UP5];19-20,238-235[AILt]	((((....(((((((((((((((...&...)))))))))))))))--..))))	GGACAAGCAACGUGUAACAAAGCGGG&AAUGUUUUGUUGCAUGUU--UGGUCC	0	0	NA	1	27.2658	0.993871	0	27.2658	yes
PC-5p-57187_150	TRINITY_DN122735_c1_g4	426	451	440	-37.7	-24.9	0.660477	10	1-4,451-448;5-17,445-433;20-24,430-426	x-x,447-446[BULt];18-19,432-431[SIL]	(((((..(((((((((((((..((((&))))--)))))))))))))..)))))	GGGCUCUGCGUGCAACGAGAAUCAUU&AAUG--UUUUGUUGCAUGUUUGGUCC	0	0	NA	1	27.2658	0.980433	0	27.2658	yes
PC-5p-57187_150	TRINITY_DN89665_c0_g1	302	327	318	-37.7	-27.3	0.724138	7.5	2-11,326-317;13-15,315-313;16-24,310-302	1-1,327-327[UP5];12-12,316-316[SIL];x-x,312-311[BULt]	(((((((((..(((.((((((((((.&.)))))))))).)))--)))))))))	GGACCGGAUGUAUGGAACAAGACAUG&AAUGUUUUGUUGCAU--GUUUGGUCC	2	49.8331	0.108923	4	109.063	0.255566	49.8331	109.063	yes
PC-5p-57187_150	TRINITY_DN94500_c2_g1	1856	1884	1875	-37.7	-24.9	0.660477	18	3-10,1882-1875;11-17,1869-1863;19-23,1861-1857	1-2,1884-1883[UP5];x-x,1874-1870[BULt];18-18,1862-1862[SIL];24-24,1856-1856[UP3]	.(((((.(((((((.....((((((((..&..))))))))-----))))))).))))).	CGACCGUGCAUGCAAUCUUGCAAAGCAGG&AAUGUUUUGU-----UGCAUGUUUGGUCC	0	0	NA	1	27.2658	0.981655	0	27.2658	yes
PC-5p-57187_150	TRINITY_DN96949_c1_g2	395	422	413	-37.7	-24.6	0.65252	14	2-11,421-412;12-24,407-395	1-1,422-422[UP5];x-x,411-408[BULt]	(((((((((((((....((((((((((.&.))))))))))----)))))))))))))	GGAUUGGACAUGUUAUUAACGGAACAUG&AAUGUUUUGUU----GCAUGUUUGGUCC	1	24.9165	0.997837	0	0	NA	24.9165	0	yes
PC-5p-610444_6	TRINITY_DN102177_c0_g1	571	593	584	-38.3	-26.2	0.684073	9.5	4-18,590-576;19-20,574-573;22-22,571-571	1-3,593-591[UP5];x-x,575-575[BULt];21-21,572-572[SIL]	(.((.(((((((((((((((...&...)))))))))))))))-)).)	GGCGUAGAACUAGAUGAGCCUGG&UAUGGCUUAUUUGGUUCU-CGGC	1	24.9165	0.963585	0	0	NA	24.9165	0	yes
PC-5p-610444_6	TRINITY_DN104324_c3_g1	1415	1436	1427	-38.3	-25.1	0.655352	13.5	5-9,1432-1428;12-22,1425-1415	1-4,1436-1433[UP5];10-11,1427-1426[SIL]	(((((((((((..(((((....&....)))))..)))))))))))	GUUGAGAGCCAUUUGAGCAACA&UAUGGCUUAUUUGGUUCUCGGC	10	249.165	0.978664	6	163.595	0.976206	249.165	163.595	yes
PC-5p-610444_6	TRINITY_DN104427_c1_g1	280	305	293	-38.3	-27.9	0.72846	13.5	3-6,303-300;7-17,296-286;18-22,284-280	1-2,305-304[UP5];x-x,299-297[BULt];x-x,285-285[BULt]	(((((.(((((((((((...((((..&..))))---)))))))))))-)))))	GCCGAGGAGCCGAGUGACGUGCCAGC&UAUGGC---UUAUUUGGUUC-UCGGC	2	49.8331	0.346385	0	0	NA	49.8331	0	yes
PC-5p-610444_6	TRINITY_DN105588_c0_g1	1546	1567	1558	-38.3	-25.7	0.671018	12.5	6-13,1562-1555;15-22,1553-1546	1-5,1567-1563[UP5];14-14,1554-1554[SIL]	((((((((.((((((((.....&.....)))))))).))))))))	GCCGAGAGGCAGAUGAGAAUUU&UAUGGCUUAUUUGGUUCUCGGC	1	24.9165	0.992508	0	0	NA	24.9165	0	yes
PC-5p-610444_6	TRINITY_DN108017_c2_g2	240	261	252	-38.3	-29.2	0.762402	10.5	6-22,256-240	1-5,261-257[UP5]	(((((((((((((((((.....&.....)))))))))))))))))	GCCGAGGACCGAAUAAGGAGAU&UAUGGCUUAUUUGGUUCUCGGC	1	24.9165	0.363481	0	0	NA	24.9165	0	yes
PC-5p-610444_6	TRINITY_DN110953_c0_g1	705	734	722	-38.3	-24.92	0.650653	19	1-7,734-728;10-18,722-714;19-22,708-705	8-9,727-723[AILt];x-x,713-709[BULt]	((((.....(((((((((.....(((((((&)))))))---..)))))))))-----))))	GCCGUAGCAGGAGCCGGAGCUAUAGCCGUA&UAUGGCU---UAUUUGGUUCU-----CGGC	1	24.9165	0.999555	0	0	NA	24.9165	0	yes
PC-5p-610444_6	TRINITY_DN112704_c0_g1	554	577	567	-38.3	-25.9	0.67624	8	2-7,576-571;8-16,569-561;18-22,558-554	1-1,577-577[UP5];x-x,570-570[BULt];17-17,560-559[AILt]	(((((..(((((((((.((((((.&.))))))-)))))))))-.)))))	GCCGGCUGACCAAGUGAAGCCAUC&UAUGGCU-UAUUUGGUU-CUCGGC	2	49.8331	0.900582	0	0	NA	49.8331	0	yes
PC-5p-610444_6	TRINITY_DN113066_c0_g1	2093	2115	2105	-38.3	-27.2	0.710183	10.5	4-6,2112-2110;7-10,2108-2105;12-22,2103-2093	1-3,2115-2113[UP5];x-x,2109-2109[BULt];11-11,2104-2104[SIL]	(((((((((((.((((.(((...&...)))-)))).)))))))))))	GCCGAGAACUAUAUGAUGCCUCC&UAUGGC-UUAUUUGGUUCUCGGC	0	0	NA	1	27.2658	0.715654	0	27.2658	yes
PC-5p-610444_6	TRINITY_DN114126_c1_g1	195	220	211	-38.3	-27.3	0.712794	9.5	3-17,218-204;18-22,199-195	1-2,220-219[UP5];x-x,203-200[BULt]	(((((....(((((((((((((((..&..)))))))))))))))----)))))	GCCGGCUAUGGAUCGAAUAAGCCAAG&UAUGGCUUAUUUGGUUC----UCGGC	0	0	NA	6	163.595	0.507526	0	163.595	yes
PC-5p-610444_6	TRINITY_DN114413_c1_g2	481	503	494	-38.3	-25.6	0.668407	10.5	5-15,499-489;17-22,486-481	1-4,503-500[UP5];16-16,488-487[AILt]	((((((..(((((((((((....&....)))))))))))-.))))))	GCUGAGCUACCAAAUGAGCAGGA&UAUGGCUUAUUUGGU-UCUCGGC	2	49.8331	0.651214	0	0	NA	49.8331	0	yes
PC-5p-610444_6	TRINITY_DN115533_c0_g1	1702	1728	1714	-38.3	-25.3	0.660574	19.5	4-8,1725-1721;9-22,1715-1702	1-3,1728-1726[UP5];x-x,1720-1716[BULt]	((((((((((((((.....(((((...&...)))))-----))))))))))))))	GCUGAGGAUCAGGUUGAUGGAGCCGAG&UAUGGCUU-----AUUUGGUUCUCGGC	0	0	NA	1	27.2658	0.99556	0	27.2658	yes
PC-5p-610444_6	TRINITY_DN115693_c1_g2	151	172	163	-38.3	-24.9	0.650131	12	4-8,169-165;10-20,163-153	1-3,172-170[UP5];9-9,164-164[SIL];21-22,152-151[UP3]	..(((((((((((.(((((...&...))))).)))))))))))..	AACGGGAGCCAAGAAGGCCGAG&UAUGGCUUAUUUGGUUCUCGGC	0	0	NA	3	81.7974	0.842836	0	81.7974	yes
PC-5p-610444_6	TRINITY_DN118685_c0_g1	627	650	639	-38.3	-26.06	0.680418	14.5	1-8,650-643;12-12,637-637;14-22,635-627	9-11,642-638[AILt];13-13,636-636[SIL]	(((((((((.(.....((((((((&))))))))--...).)))))))))	GCCGGGGACGAUACCGAGGCCGUG&UAUGGCUU--AUUUGGUUCUCGGC	0	0	NA	2	54.5316	0.8602	0	54.5316	yes
PC-5p-610444_6	TRINITY_DN118933_c1_g1	589	612	602	-38.3	-25.8	0.673629	9	1-8,612-605;9-14,603-598;16-20,596-592;21-22,590-589	x-x,604-604[BULt];15-15,597-597[SIL];x-x,591-591[BULt]	((.(((((.((((((.((((((((&))))))))-)))))).)))))-))	GCACGGGAUCCGGAUCAGGCCGUG&UAUGGCUU-AUUUGGUUCUCG-GC	0	0	NA	1	27.2658	0.978446	0	27.2658	yes
PC-5p-610444_6	TRINITY_DN119082_c0_g1	606	628	619	-38.3	-25.2	0.657963	12	4-12,625-617;14-22,614-606	1-3,628-626[UP5];13-13,616-615[AILt]	(((((((((..(((((((((...&...)))))))))-.)))))))))	GCUGAGAGCUGGAAUGAGCUGCA&UAUGGCUUAUUU-GGUUCUCGGC	8	199.332	0.745516	10	272.658	0.774722	199.332	272.658	yes
PC-5p-610444_6	TRINITY_DN122410_c1_g1	460	484	475	-38.3	-27.4	0.715405	6	2-16,483-469;17-22,465-460	1-1,484-484[UP5];x-x,468-466[BULt]	((((((...(((((((((((((((.&.)))))))))))))))---))))))	GUUGAGUACAACCGAAUAAGCCAUU&UAUGGCUUAUUUGGUU---CUCGGC	1	24.9165	0.721944	0	0	NA	24.9165	0	yes
PC-5p-610444_6	TRINITY_DN125007_c4_g1	644	667	656	-38.3	-25.04	0.653786	17	1-8,667-660;13-22,653-644	9-12,659-654[AILt]	((((((((((......((((((((&))))))))--....))))))))))	GCCGAGGAUUUGCAAGGGGCCGUG&UAUGGCUU--AUUUGGUUCUCGGC	1	24.9165	0.999375	0	0	NA	24.9165	0	yes
PC-5p-610444_6	TRINITY_DN88620_c0_g1	125	148	139	-38.3	-26.2	0.684073	8.5	2-7,147-142;9-16,140-133;17-22,130-125	1-1,148-148[UP5];8-8,141-141[SIL];x-x,132-131[BULt]	((((((..((((((((.((((((.&.)))))).))))))))--))))))	GCUGAGUGGGCCAAGUUGGCCAUC&UAUGGCUUAUUUGGUU--CUCGGC	1	24.9165	0.962188	2	54.5316	0.819452	24.9165	54.5316	yes
PC-5p-610444_6	TRINITY_DN88817_c0_g1	56	77	68	-38.3	-33	0.861619	7.5	3-6,75-72;8-22,70-56	1-2,77-76[UP5];7-7,71-71[SIL]	(((((((((((((((.((((..&..)))).)))))))))))))))	GCCGAGAGCCGGAUAUGCCAAC&UAUGGCUUAUUUGGUUCUCGGC	0	0	NA	2	54.5316	0.0573179	0	54.5316	yes
PC-5p-610444_6	TRINITY_DN91134_c4_g3	148	171	162	-38.3	-25.9	0.67624	8	2-14,170-158;15-21,155-149	1-1,171-171[UP5];x-x,157-156[BULt];22-22,148-148[UP3]	.(((((((..(((((((((((((.&.)))))))))))))--))))))).	AUCGAGAGCUCCAAGUGGGCCAUU&UAUGGCUUAUUUGG--UUCUCGGC	4	99.6661	0.577299	2	54.5316	0.608509	99.6661	54.5316	yes
PC-5p-610444_6	TRINITY_DN93242_c0_g1	397	417	408	-38.3	-25.2	0.657963	9.5	5-18,413-400;20-22,399-397	1-4,417-414[UP5];19-19,x-x[BULq]	(((-((((((((((((((....&....)))))))))))))).)))	GCC-AGAGCCAAAUAAGUAAAC&UAUGGCUUAUUUGGUUCUCGGC	4	99.6661	0.972239	0	0	NA	99.6661	0	yes
PC-5p-610444_6	TRINITY_DN94239_c0_g5	172	192	184	-38.3	-25.3	0.660574	8.5	3-7,190-186;9-17,185-177;19-21,175-173	1-2,192-191[UP5];8-8,x-x[BULq];18-18,176-176[SIL];22-22,172-172[UP3]	.(((.(((((((((-(((((..&..))))).))))))))).))).	ACCGUGAGCCAAGU-AGCCAAA&UAUGGCUUAUUUGGUUCUCGGC	2	49.8331	0.729373	4	109.063	0.964733	49.8331	109.063	yes
PC-5p-610444_6	TRINITY_DN94866_c1_g1	286	306	297	-38.3	-25.48	0.665274	11.5	3-9,304-298;13-15,294-292;17-22,291-286	1-2,306-305[UP5];10-12,297-295[SIL];16-16,x-x[BULq]	((((((-(((...(((((((..&..)))))))...))).))))))	GCCGAG-GCCUGUUGAGCCACA&UAUGGCUUAUUUGGUUCUCGGC	2	49.8331	0.686807	11	299.924	0.948747	49.8331	299.924	yes
PC-5p-610444_6	TRINITY_DN94879_c0_g2	45	67	57	-38.3	-28.2	0.736292	8.5	1-3,67-65;5-8,63-60;10-22,57-45	4-4,64-64[SIL];9-9,59-58[AILt]	(((((((((((((..((((.(((&))).))))-.)))))))))))))	GCCGAGAACCAAACAAAGUGGUG&UAUGGCUU-AUUUGGUUCUCGGC	0	0	NA	2	54.5316	0.284291	0	54.5316	yes
PC-5p-610444_6	TRINITY_DN96320_c2_g1	443	466	456	-38.3	-26.8	0.699739	7.5	2-4,465-463;5-9,461-457;11-19,455-447;20-22,445-443	1-1,466-466[UP5];x-x,462-462[BULt];10-10,456-456[SIL];x-x,446-446[BULt]	(((.(((((((((.(((((.(((.&.)))-))))).)))))))))-)))	GCCGGAGAGCCAGCUAAGCUCAUC&UAUG-GCUUAUUUGGUUCUC-GGC	9	224.249	0.319151	3	81.7974	0.342071	224.249	81.7974	yes
PC-5p-610444_6	TRINITY_DN96320_c2_g2	311	334	325	-38.3	-25.2	0.657963	9.5	3-12,332-323;13-14,321-320;16-18,318-316;19-22,314-311	1-2,334-333[UP5];x-x,322-322[BULt];15-15,319-319[SIL];x-x,315-315[BULt]	((((.(((.((.((((((((((..&..))))))))))-)).)))-))))	GCCGCAGGCCCAAGAUGAGCCAAG&UAUGGCUUAUUU-GGUUCU-CGGC	2	49.8331	0.969897	3	81.7974	0.966755	49.8331	81.7974	yes
PC-5p-610444_6	TRINITY_DN99972_c0_g1	1564	1586	1577	-38.3	-25.5	0.665796	10	3-10,1584-1577;12-16,1575-1571;17-22,1569-1564	1-2,1586-1585[UP5];11-11,1576-1576[SIL];x-x,1570-1570[BULt]	((((((.(((((.((((((((..&..)))))))).)))))-))))))	GCUGGGAAGCUAUGUGAGCCAGU&UAUGGCUUAUUUGGUU-CUCGGC	0	0	NA	2	54.5316	0.937603	0	54.5316	yes
PC-5p-62765_136	TRINITY_DN100118_c1_g3	441	461	452	-34.6	-24.1	0.696532	6.5	1-17,461-445	18-21,444-441[UP3]	....(((((((((((((((((&)))))))))))))))))....	UUAAACAGGUCUCAAGAUGAG&CUUAUUUUGAGACUUGUGGGC	1	24.9165	0.899374	0	0	NA	24.9165	0	yes
PC-5p-62765_136	TRINITY_DN101224_c0_g1	956	979	970	-34.6	-22.8	0.65896	7.5	2-18,978-962;19-21,958-956	1-1,979-979[UP5];x-x,961-959[BULt]	(((...(((((((((((((((((.&.)))))))))))))))))---)))	GCUUCACAUGAGUCUCAAAGUGAC&CUUAUUUUGAGACUUGUG---GGC	0	0	NA	2	54.5316	0.772828	0	54.5316	yes
PC-5p-62765_136	TRINITY_DN101241_c3_g1	324	344	335	-34.6	-23.9	0.690751	3.5	1-19,344-326	20-21,325-324[UP3]	..(((((((((((((((((((&)))))))))))))))))))..	GAUCAUGAGUCUCAAAAUAAG&CUUAUUUUGAGACUUGUGGGC	1	24.9165	0.922685	0	0	NA	24.9165	0	yes
PC-5p-62765_136	TRINITY_DN102908_c1_g2	45	66	56	-34.6	-23.2	0.67052	10	1-4,66-63;7-20,59-46	5-6,62-60[AILt];21-21,45-45[UP3]	.((((((((((((((...((((&))))-..)))))))))))))).	CCCCACAAGUUUCGAUACUGAG&CUUA-UUUUGAGACUUGUGGGC	2	49.8331	0.637546	0	0	NA	49.8331	0	yes
PC-5p-62765_136	TRINITY_DN109029_c1_g2	807	826	818	-34.6	-23.3	0.67341	6.5	1-9,826-818;11-14,817-814;16-20,812-808	10-10,x-x[BULq];15-15,813-813[SIL];21-21,807-807[UP3]	.(((((.((((-(((((((((&))))))))).)))).))))).	UCCCACUGGUC-CAGAAUGAG&CUUAUUUUGAGACUUGUGGGC	9	224.249	0.920434	4	109.063	0.914516	224.249	109.063	yes
PC-5p-62765_136	TRINITY_DN111745_c0_g2	830	850	841	-34.6	-23.7	0.684971	6.5	1-3,850-848;5-20,846-831	4-4,847-847[SIL];21-21,830-830[UP3]	.((((((((((((((((.(((&))).)))))))))))))))).	UUCCAUGAGUCUCGAGAGAAG&CUUAUUUUGAGACUUGUGGGC	0	0	NA	3	81.7974	0.826419	0	81.7974	yes
PC-5p-62765_136	TRINITY_DN112519_c2_g1	827	846	838	-34.6	-27.6	0.797688	7	1-8,846-839;11-21,837-827	9-10,838-838[AILq]	(((((((((((.-((((((((&))))))))..)))))))))))	GCCCACAAGUCG-GGGAUAAG&CUUAUUUUGAGACUUGUGGGC	1	24.9165	0.510933	1	27.2658	0.458092	24.9165	27.2658	yes
PC-5p-62765_136	TRINITY_DN113420_c1_g1	1565	1585	1576	-34.6	-26	0.751445	12	7-21,1579-1565	1-6,1585-1580[UP5]	(((((((((((((((......&......)))))))))))))))	GCCCACAAGUUUCAACAGCUC&CUUAUUUUGAGACUUGUGGGC	1	24.9165	0.624227	0	0	NA	24.9165	0	yes
PC-5p-62765_136	TRINITY_DN115901_c0_g2	771	791	782	-34.6	-22.6	0.653179	10	1-6,791-786;9-9,783-783;12-21,780-771	7-8,785-784[SIL];10-11,782-781[SIL]	((((((((((..(..((((((&))))))..)..))))))))))	GCCUGCAAGUAGCUUAAUGAG&CUUAUUUUGAGACUUGUGGGC	0	0	NA	1	27.2658	0.998418	0	27.2658	yes
PC-5p-62765_136	TRINITY_DN116382_c0_g1	1627	1646	1637	-34.6	-23.1	0.66763	5	1-12,1646-1635;14-21,1634-1627	13-13,x-x[BULq]	((((((((-((((((((((((&)))))))))))).))))))))	GCUCGCAA-UCUUGAAAUGAG&CUUAUUUUGAGACUUGUGGGC	0	0	NA	2	54.5316	0.943449	0	54.5316	yes
PC-5p-62765_136	TRINITY_DN116788_c3_g1	4024	4044	4035	-34.6	-22.9	0.66185	12.5	6-20,4039-4025	1-5,4044-4040[UP5];21-21,4024-4024[UP3]	.(((((((((((((((.....&.....))))))))))))))).	ACCCGCAAGUUUCAAGCUUAA&CUUAUUUUGAGACUUGUGGGC	1	24.9165	0.998399	0	0	NA	24.9165	0	yes
PC-5p-62765_136	TRINITY_DN117925_c0_g1	507	528	519	-34.6	-25.7	0.742775	6	1-1,528-528;3-16,526-513;17-21,511-507	2-2,527-527[SIL];x-x,512-512[BULt]	(((((.((((((((((((((.(&).))))))))))))))-)))))	GCUCGCCAAGUCUCAGGAUAUG&CUUAUUUUGAGACUUG-UGGGC	0	0	NA	2	54.5316	0.434806	0	54.5316	yes
PC-5p-62765_136	TRINITY_DN120445_c0_g2	864	885	875	-34.6	-23.2	0.67052	10	1-4,885-882;7-20,878-865	5-6,881-879[AILt];21-21,864-864[UP3]	.((((((((((((((...((((&))))-..)))))))))))))).	CCCCACAAGUUUCGAUACUGAG&CUUA-UUUUGAGACUUGUGGGC	1	24.9165	0.993793	0	0	NA	24.9165	0	yes
PC-5p-62765_136	TRINITY_DN120859_c1_g4	394	414	405	-34.6	-24.6	0.710983	6.5	1-11,414-404;13-16,403-400;17-21,398-394	12-12,x-x[BULq];x-x,399-399[BULt]	(((((.((((-(((((((((((&))))))))))).))))-)))))	GCUCGUCAGG-CUCAGAGUAAG&CUUAUUUUGAGACUUG-UGGGC	2	49.8331	0.297888	0	0	NA	49.8331	0	yes
PC-5p-62765_136	TRINITY_DN122960_c2_g1	400	420	411	-34.6	-24.3	0.702312	5.5	3-8,418-413;10-21,411-400	1-2,420-419[UP5];9-9,412-412[SIL]	((((((((((((.((((((..&..)))))).))))))))))))	GCCUACAAGUCUAAAAAUAUC&CUUAUUUUGAGACUUGUGGGC	0	0	NA	4	109.063	0.6544	0	109.063	yes
PC-5p-62765_136	TRINITY_DN123048_c2_g3	1173	1193	1184	-34.6	-23.8	0.687861	7.5	1-17,1193-1177	18-21,1176-1173[UP3]	....(((((((((((((((((&)))))))))))))))))....	UUAAACAGGUCUCGAGAUGAG&CUUAUUUUGAGACUUGUGGGC	3	74.7496	0.781004	0	0	NA	74.7496	0	yes
PC-5p-62765_136	TRINITY_DN123493_c1_g1	951	972	962	-34.6	-22.5	0.650289	9	2-8,971-965;11-20,961-952	1-1,972-972[UP5];9-10,964-962[AILt];21-21,951-951[UP3]	.((((((((((...(((((((.&.)))))))-..)))))))))).	CCCCACAAGUCGAAAAAAUGAU&CUUAUUUU-GAGACUUGUGGGC	1	24.9165	0.999617	0	0	NA	24.9165	0	yes
PC-5p-62765_136	TRINITY_DN124186_c3_g1	2149	2169	2160	-34.6	-22.7	0.656069	16	9-20,2161-2150	1-8,2169-2162[UP5];21-21,2149-2149[UP3]	.((((((((((((........&........)))))))))))).	UCCCACAAGUCUCUUGGAUUU&CUUAUUUUGAGACUUGUGGGC	1	24.9165	0.999055	0	0	NA	24.9165	0	yes
PC-5p-62765_136	TRINITY_DN95222_c0_g1	568	588	579	-34.6	-25.4	0.734104	14.5	8-21,581-568	1-7,588-582[UP5]	((((((((((((((.......&.......))))))))))))))	GCCCACGAGUCUUAUGGCAAA&CUUAUUUUGAGACUUGUGGGC	0	0	NA	1	27.2658	0.676509	0	27.2658	yes
PC-5p-62765_136	TRINITY_DN97169_c1_g1	398	418	409	-34.6	-23.1	0.66763	10	5-16,414-403;18-21,401-398	1-4,418-415[UP5];17-17,402-402[SIL]	((((.((((((((((((....&....)))))))))))).))))	GCCCCCAAGUUUCAAGAAUUA&CUUAUUUUGAGACUUGUGGGC	1	24.9165	0.995577	2	54.5316	0.941179	24.9165	54.5316	yes
PC-5p-6321_1070	TRINITY_DN100914_c2_g1	644	664	656	-36.4	-25.6	0.703297	7	1-4,664-661;6-16,660-650;17-21,648-644	5-5,x-x[BULq];x-x,649-649[BULt]	(((((.(((((((((((-((((&)))).)))))))))))-)))))	GCUGGUUGAUGAGGCUG-GGAA&UUCUAUAGUCUCAUCG-CCAGU	1	24.9165	0.823012	0	0	NA	24.9165	0	yes
PC-5p-6321_1070	TRINITY_DN102624_c0_g1	133	153	144	-36.4	-23.7	0.651099	13.5	7-19,147-135;21-21,133-133	1-6,153-148[UP5];20-20,134-134[SIL]	(.(((((((((((((......&......))))))))))))).)	GGUGGCGAUGGGACUCUUCAC&UUCUAUAGUCUCAUCGCCAGU	1	24.9165	0.998208	0	0	NA	24.9165	0	yes
PC-5p-6321_1070	TRINITY_DN104075_c0_g2	284	305	296	-36.4	-24.7	0.678571	8.5	2-9,304-297;11-12,295-294;14-21,291-284	1-1,305-305[UP5];10-10,296-296[SIL];13-13,293-292[AILt]	((((((((..((.((((((((.&.)))))))).))-.))))))))	GCUGGCGAGGGAAGCUAUAGGU&UUCUAUAGUCUC-AUCGCCAGU	0	0	NA	2	54.5316	0.788675	0	54.5316	yes
PC-5p-6321_1070	TRINITY_DN104174_c1_g1	613	636	627	-36.4	-24	0.659341	7.5	2-6,635-631;8-13,629-624;14-21,620-613	1-1,636-636[UP5];7-7,630-630[SIL];x-x,623-621[BULt]	((((((((...((((((.(((((.&.))))).))))))---))))))))	ACUGGUGAGAAUGGGACAAUAGAU&UUCUAUAGUCUCA---UCGCCAGU	0	0	NA	2	54.5316	0.941179	0	54.5316	yes
PC-5p-6321_1070	TRINITY_DN105278_c0_g2	27	48	38	-36.4	-24.1	0.662088	9	1-6,48-43;7-7,41-41;9-19,39-29;21-21,27-27	x-x,42-42[BULt];8-8,40-40[SIL];20-20,28-28[SIL]	(.(((((((((((.(.((((((&))))))-).))))))))))).)	GGUGGCGGUGAGGGUGAUGGGA&UUCUAU-AGUCUCAUCGCCAGU	1	24.9165	0.990249	0	0	NA	24.9165	0	yes
PC-5p-6321_1070	TRINITY_DN105847_c0_g1	1658	1678	1669	-36.4	-24.4	0.67033	8.5	3-4,1676-1675;6-21,1673-1658	1-2,1678-1677[UP5];5-5,1674-1674[SIL]	((((((((((((((((.((..&..)).))))))))))))))))	AUUGGUGGUGGGACUGAAGCU&UUCUAUAGUCUCAUCGCCAGU	2	49.8331	0.539995	0	0	NA	49.8331	0	yes
PC-5p-6321_1070	TRINITY_DN107351_c1_g1	1112	1133	1124	-36.4	-24	0.659341	10	1-6,1133-1128;8-10,1126-1124;11-21,1122-1112	7-7,1127-1127[SIL];x-x,1123-1123[BULt]	(((((((((((.(((.((((((&)))))).)))-)))))))))))	GCUGGUGGUGGUGGCAGUGGAG&UUCUAUAGUC-UCAUCGCCAGU	0	0	NA	2	54.5316	0.674373	0	54.5316	yes
PC-5p-6321_1070	TRINITY_DN107589_c1_g2	315	335	326	-36.4	-28.1	0.771978	7	1-9,335-327;11-21,325-315	10-10,326-326[SIL]	(((((((((((.(((((((((&))))))))).)))))))))))	ACUGGUGAUGGAGCUGUGGAG&UUCUAUAGUCUCAUCGCCAGU	1	24.9165	0.260041	1	27.2658	0.227375	24.9165	27.2658	yes
PC-5p-6321_1070	TRINITY_DN109648_c0_g1	746	766	757	-36.4	-24.1	0.662088	9	2-8,765-759;10-20,757-747	1-1,766-766[UP5];9-9,758-758[SIL];21-21,746-746[UP3]	.(((((((((((.(((((((.&.))))))).))))))))))).	UCUGGUGGUGAGUUUGUGGGG&UUCUAUAGUCUCAUCGCCAGU	2	49.8331	0.923592	0	0	NA	49.8331	0	yes
PC-5p-6321_1070	TRINITY_DN112202_c1_g1	74	95	85	-36.4	-26.5	0.728022	9	2-7,94-89;8-18,87-77	1-1,95-95[UP5];x-x,88-88[BULt];19-21,76-74[UP3]	...(((((((((((.((((((.&.))))))-)))))))))))...	AUAGGCGAUGGGGCUUGUAGAU&UUCUAUA-GUCUCAUCGCCAGU	0	0	NA	1	27.2658	0.491937	0	27.2658	yes
PC-5p-6321_1070	TRINITY_DN116316_c1_g6	754	774	765	-36.4	-24	0.659341	8	1-11,774-764;13-20,762-755	12-12,763-763[SIL];21-21,754-754[UP3]	.((((((((.(((((((((((&))))))))))).)))))))).	CCUGGUGAUCGGAUUAUGGGG&UUCUAUAGUCUCAUCGCCAGU	1	24.9165	0.994243	0	0	NA	24.9165	0	yes
PC-5p-6321_1070	TRINITY_DN122036_c3_g3	863	888	879	-36.4	-24	0.659341	10.5	1-7,888-882;9-15,880-874;16-21,868-863	8-8,881-881[SIL];x-x,873-869[BULt]	((((((.....(((((((.(((((((&))))))).)))))))-----))))))	ACUGGUAUGUUGGUGAGGGUAUGGAG&UUCUAUAGUCUCAUC-----GCCAGU	2	49.8331	0.64581	0	0	NA	49.8331	0	yes
PC-5p-6321_1070	TRINITY_DN122175_c0_g1	1213	1233	1224	-36.4	-24.8	0.681319	7.5	2-5,1232-1229;8-19,1226-1215;21-21,1213-1213	1-1,1233-1233[UP5];6-7,1228-1227[SIL];20-20,1214-1214[SIL]	(.((((((((((((..((((.&.))))..)))))))))))).)	AGUGGUGAUGAGGCAUUAGAU&UUCUAUAGUCUCAUCGCCAGU	1	24.9165	0.94279	0	0	NA	24.9165	0	yes
PC-5p-6321_1070	TRINITY_DN123184_c1_g1	847	867	858	-36.4	-23.88	0.656044	9	1-4,867-864;8-21,860-847	5-7,863-861[SIL]	((((((((((((((...((((&))))...))))))))))))))	AUUGGUGAUGAGAUGCCGGAA&UUCUAUAGUCUCAUCGCCAGU	1	24.9165	0.996964	0	0	NA	24.9165	0	yes
PC-5p-6321_1070	TRINITY_DN123839_c3_g1	195	215	206	-36.4	-26.3	0.722527	7	3-11,213-205;14-21,202-195	1-2,215-214[UP5];12-13,204-203[SIL]	((((((((..(((((((((..&..)))))))))..))))))))	ACUGGCGAACAGACUGUAGCC&UUCUAUAGUCUCAUCGCCAGU	1	24.9165	0.594843	0	0	NA	24.9165	0	yes
PC-5p-6321_1070	TRINITY_DN123872_c3_g2	1909	1929	1920	-36.4	-29.1	0.799451	4	1-9,1929-1921;11-21,1919-1909	10-10,1920-1920[SIL]	(((((((((((.(((((((((&))))))))).)))))))))))	GCUGGUGAUGAAACUAUAGGA&UUCUAUAGUCUCAUCGCCAGU	1	24.9165	0.106791	0	0	NA	24.9165	0	yes
PC-5p-6321_1070	TRINITY_DN124518_c2_g1	650	670	661	-36.4	-25.2	0.692308	8.5	3-12,668-659;14-19,657-652	1-2,670-669[UP5];13-13,658-658[SIL];20-21,651-650[UP3]	..((((((.((((((((((..&..)))))))))).))))))..	AAUGGCGGCGGGACUGUAGUA&UUCUAUAGUCUCAUCGCCAGU	1	24.9165	0.887344	0	0	NA	24.9165	0	yes
PC-5p-6321_1070	TRINITY_DN124920_c3_g1	210	230	220	-36.4	-24.1	0.662088	8	3-6,228-225;8-13,222-217;15-21,216-210	1-2,230-229[UP5];7-7,224-223[AILt];14-14,x-x[BULq]	(((((((-((((((..((((..&..))))-.)))))).)))))))	ACUGGCG-UGAGACCGAUAGCA&UUCUAU-AGUCUCAUCGCCAGU	3	74.7496	0.614552	1	27.2658	0.981655	74.7496	27.2658	yes
PC-5p-6321_1070	TRINITY_DN91907_c0_g1	693	712	704	-36.4	-24.1	0.662088	7	1-4,712-709;7-19,707-695;21-21,693-693	5-6,708-708[AILq];20-20,694-694[SIL]	(.(((((((((((((.-((((&))))..))))))))))))).)	AGUGGUGGUGAGACUC-GGAA&UUCUAUAGUCUCAUCGCCAGU	1	24.9165	0.989874	1	27.2658	0.980433	24.9165	27.2658	yes
PC-5p-6321_1070	TRINITY_DN93324_c4_g3	91	114	105	-36.4	-25.9	0.711538	8	2-15,113-100;16-19,96-93	1-1,114-114[UP5];x-x,99-97[BULt];20-21,92-91[UP3]	..((((...((((((((((((((.&.))))))))))))))---))))..	GAUGGCUUGGAUGGGACUAUGGAU&UUCUAUAGUCUCAUC---GCCAGU	2	49.8331	0.50773	0	0	NA	49.8331	0	yes
PC-5p-6321_1070	TRINITY_DN94232_c0_g1	714	734	725	-36.4	-24.7	0.678571	8	3-5,732-730;7-20,728-715	1-2,734-733[UP5];6-6,729-729[SIL];21-21,714-714[UP3]	.((((((((((((((.(((..&..))).)))))))))))))).	GUUGGUGAUGAGGCUUUAGUA&UUCUAUAGUCUCAUCGCCAGU	1	24.9165	0.946939	0	0	NA	24.9165	0	yes
PC-5p-6321_1070	TRINITY_DN96234_c1_g3	1208	1229	1220	-36.4	-24.1	0.662088	9.5	1-10,1229-1220;11-18,1218-1211	x-x,1219-1219[BULt];19-21,1210-1208[UP3]	...((((((((.((((((((((&))))))))))-))))))))...	GGAGGUGGUGGCGGCUAUGGAG&UUCUAUAGUC-UCAUCGCCAGU	0	0	NA	3	81.7974	0.922525	0	81.7974	yes
PC-5p-6321_1070	TRINITY_DN96400_c1_g2	901	924	912	-36.4	-23.8	0.653846	9.5	1-6,924-919;7-20,915-902	x-x,918-916[BULt];21-21,901-901[UP3]	.((((((((((((((...((((((&))))))---)))))))))))))).	GUUGGUGAUGAGAUUGAGAUAGAG&UUCUAU---AGUCUCAUCGCCAGU	1	24.9165	0.997837	0	0	NA	24.9165	0	yes
PC-5p-6321_1070	TRINITY_DN99582_c0_g2	147	168	159	-36.4	-23.8	0.653846	10	3-12,166-157;13-15,155-153;17-21,151-147	1-2,168-167[UP5];x-x,156-156[BULt];16-16,152-152[SIL]	(((((.(((.((((((((((..&..))))))))))-))).)))))	ACUGGGGAUCGGGAUUGUGGCA&UUCUAUAGUCUC-AUCGCCAGU	0	0	NA	2	54.5316	0.954454	0	54.5316	yes
PC-5p-6321_1070	TRINITY_DN99890_c0_g4	1404	1427	1418	-36.4	-23.7	0.651099	13.5	3-10,1425-1418;11-21,1414-1404	1-2,1427-1426[UP5];x-x,1417-1415[BULt]	(((((((((((...((((((((..&..))))))))---)))))))))))	ACUGGUGAUGGGUCGAUUGUGGUU&UUCUAUAGUC---UCAUCGCCAGU	0	0	NA	1	27.2658	0.995415	0	27.2658	yes
PC-5p-65479_130	TRINITY_DN103894_c1_g1	830	859	850	-42.3	-28.1	0.664303	17.5	6-18,854-842;19-24,835-830	1-5,859-855[UP5];x-x,841-836[BULt]	((((((......(((((((((((((.....&.....)))))))))))))------))))))	GGAGGGUUAGCUGUGGAGUGGUCUGUUGAA&AUUUUCGGACCAUUUUAC------CCCUCC	2	49.8331	0.49766	3	81.7974	0.487761	49.8331	81.7974	yes
PC-5p-65479_130	TRINITY_DN104402_c2_g2	364	392	383	-42.3	-27.7	0.654846	15	6-15,387-378;16-19,373-370;20-24,368-364	1-5,392-388[UP5];x-x,377-374[BULt];x-x,369-369[BULt]	(((((.((((....((((((((((.....&.....))))))))))----))))-)))))	GGGGGUGGUGGUGCAAAUGGUCCGCCGCA&AUUUUCGGACCAUUU----UACC-CCUCC	0	0	NA	1	27.2658	0.81302	0	27.2658	yes
PC-5p-65479_130	TRINITY_DN113018_c1_g1	701	727	718	-42.3	-31.1	0.735225	9	1-10,727-718;11-11,716-716;13-20,713-706;21-24,704-701	x-x,717-717[BULt];12-12,715-714[AILt];x-x,705-705[BULt]	((((.((((((((..(.((((((((((&))))))))))-)-.))))))))-))))	GGAGAGGGUGAAGGGGUGUCCGAAGAU&AUUUUCGGAC-C-AUUUUACCC-CUCC	7	174.416	0.0778039	12	327.189	0.00294487	174.416	327.189	yes
PC-5p-65479_130	TRINITY_DN114007_c0_g1	1013	1041	1032	-42.3	-28.2	0.666667	18	7-17,1035-1025;18-24,1019-1013	1-6,1041-1036[UP5];x-x,1024-1020[BULt]	(((((((.....(((((((((((......&......)))))))))))-----)))))))	GGAGGGGGAGUAUGGGGUGGUCCCCACAG&AUUUUCGGACCAUUUUA-----CCCCUCC	1	24.9165	0.664357	0	0	NA	24.9165	0	yes
PC-5p-65479_130	TRINITY_DN114542_c0_g1	75	98	89	-42.3	-27.8	0.65721	12	4-6,95-93;9-15,90-84;18-24,81-75	1-3,98-96[UP5];7-8,92-91[SIL];16-17,83-82[SIL]	(((((((..(((((((..(((...&...)))..)))))))..)))))))	GGAGGGGGAAAAUGGUGAGAGCUC&AUUUUCGGACCAUUUUACCCCUCC	2	49.8331	0.629247	1	27.2658	0.794028	49.8331	27.2658	yes
PC-5p-65479_130	TRINITY_DN114771_c2_g1	515	540	531	-42.3	-28.2	0.666667	10	2-10,539-531;11-18,529-522;19-23,520-516	1-1,540-540[UP5];x-x,530-530[BULt];x-x,521-521[BULt];24-24,515-515[UP3]	.(((((.((((((((.(((((((((.&.)))))))))-))))))))-))))).	UGAGGGCGUGGGGUGAGUCUGAGGAG&AUUUUCGGAC-CAUUUUAC-CCCUCC	0	0	NA	1	27.2658	0.594594	0	27.2658	yes
PC-5p-65479_130	TRINITY_DN117085_c0_g2	217	240	231	-42.3	-34.2	0.808511	13	7-24,234-217	1-6,240-235[UP5]	((((((((((((((((((......&......))))))))))))))))))	GGAGGGGUGAAGUGGUCUUUUGCC&AUUUUCGGACCAUUUUACCCCUCC	0	0	NA	1	27.2658	0.0317309	0	27.2658	yes
PC-5p-65479_130	TRINITY_DN124342_c0_g1	2112	2135	2126	-42.3	-27.6	0.652482	10	3-16,2133-2120;18-21,2118-2115	1-2,2135-2134[UP5];17-17,2119-2119[SIL];22-24,2114-2112[UP3]	...((((.((((((((((((((..&..)))))))))))))).))))...	CCUGGGGAGAAGUGGUCUGAGACG&AUUUUCGGACCAUUUUACCCCUCC	0	0	NA	2	54.5316	0.374308	0	54.5316	yes
PC-5p-65479_130	TRINITY_DN93737_c1_g2	530	562	546	-42.3	-28	0.661939	19.5	1-8,562-555;9-15,547-541;16-17,539-538;18-24,536-530	x-x,554-548[BULt];x-x,540-540[BULt];x-x,537-537[BULt]	(((((((.((.(((((((.......((((((((&))))))))-------)))))))-))-)))))))	GGAGGGGAUGCAGGUGGUGAUCCUCCCGAGGAU&AUUUUCGG-------ACCAUUU-UA-CCCCUCC	1	24.9165	0.751638	0	0	NA	24.9165	0	yes
PC-5p-657220_6	TRINITY_DN100602_c1_g1	519	543	534	-42.8	-28.1	0.656542	10.5	4-15,540-529;16-19,526-523;22-23,520-519	1-3,543-541[UP5];x-x,528-527[BULt];20-21,522-521[SIL]	((..((((..((((((((((((...&...))))))))))))--))))..))	UGGGGGUGAUGGGGUUAGGGUUAGG&AUAAACCCUAGCCUC--CACCAACA	2	49.8331	0.885443	0	0	NA	49.8331	0	yes
PC-5p-657220_6	TRINITY_DN106752_c1_g1	500	522	513	-42.8	-28.1	0.656542	14	5-9,518-514;12-19,511-504;22-22,501-501	1-4,522-519[UP5];10-11,513-512[SIL];20-21,503-502[SIL];23-23,500-500[UP3]	.(..((((((((..(((((....&....)))))..))))))))..).	AGGAGGUGGAGGAGAGGGUGAUA&AUAAACCCUAGCCUCCACCAACA	1	24.9165	0.985246	1	27.2658	0.972988	24.9165	27.2658	yes
PC-5p-657220_6	TRINITY_DN115562_c0_g2	468	492	483	-42.8	-29.28	0.684112	6.5	1-14,492-479;17-23,474-468	15-16,478-475[AILt]	(((((((....((((((((((((((&))))))))))))))--..)))))))	UGUUGGUUCUAGGGUUAGGGUUUGU&AUAAACCCUAGCCU--CCACCAACA	1	24.9165	0.847753	0	0	NA	24.9165	0	yes
PC-5p-657220_6	TRINITY_DN116222_c0_g1	77	99	90	-42.8	-38.4	0.897196	10	6-23,94-77	1-5,99-95[UP5]	((((((((((((((((((.....&.....))))))))))))))))))	UGUUGGUGGAGGCUGGGGCGGAU&AUAAACCCUAGCCUCCACCAACA	0	0	NA	1	27.2658	0.062455	0	27.2658	yes
PC-5p-657220_6	TRINITY_DN119642_c0_g2	271	293	284	-42.8	-27.9	0.651869	9.5	2-9,292-285;11-18,283-276	1-1,293-293[UP5];10-10,284-284[SIL];19-23,275-271[UP3]	.....((((((((.((((((((.&.)))))))).)))))))).....	AAUCAGUGGGGGCCGGGGUUUAG&AUAAACCCUAGCCUCCACCAACA	0	0	NA	2	54.5316	0.912817	0	54.5316	yes
PC-5p-657220_6	TRINITY_DN119941_c0_g2	68	92	83	-42.8	-28.4	0.663551	17	7-11,86-82;12-22,79-69	1-6,92-87[UP5];x-x,81-80[BULt];23-23,68-68[UP3]	.(((((((((((..(((((......&......)))))--))))))))))).	GGUUGGUGGAGGAACUGGGAUCAAG&AUAAACCCUAG--CCUCCACCAACA	1	24.9165	0.962188	0	0	NA	24.9165	0	yes
PC-5p-657220_6	TRINITY_DN92834_c0_g3	528	551	541	-42.8	-28.6	0.668224	12.5	5-6,547-546;7-20,544-531;22-23,529-528	1-4,551-548[UP5];x-x,545-545[BULt];21-21,530-530[SIL]	((.((((((((((((((.((....&....))-)))))))))))))).))	UGGUGGUGGGGGUUGGGUGUGGAG&AUAAAC-CCUAGCCUCCACCAACA	1	24.9165	0.952605	0	0	NA	24.9165	0	yes
PC-5p-657220_6	TRINITY_DN93503_c1_g1	155	177	168	-42.8	-28.1	0.656542	12	5-13,173-165;15-20,163-158;22-22,156-156	1-4,177-174[UP5];14-14,164-164[SIL];21-21,157-157[SIL];23-23,155-155[UP3]	.(.((((((.(((((((((....&....))))))))).)))))).).	AGGUGGUGGCGGUUGGGGUGGUG&AUAAACCCUAGCCUCCACCAACA	2	49.8331	0.894356	0	0	NA	49.8331	0	yes
PC-5p-66401_128	TRINITY_DN106324_c1_g2	14	37	28	-36.6	-24.7	0.674863	13	6-12,32-26;14-22,24-16	1-5,37-33[UP5];13-13,25-25[SIL];23-24,15-14[UP3]	..(((((((((.(((((((.....&.....))))))).)))))))))..	AUUGUGAGUGUGCUAAUCACGAAU&AAAAAUGAUUGGGACACUCACAUU	0	0	NA	1	27.2658	0.538783	0	27.2658	yes
PC-5p-66401_128	TRINITY_DN124315_c2_g3	195	218	209	-36.6	-24	0.655738	12	4-17,215-202	1-3,218-216[UP5];18-24,201-195[UP3]	.......((((((((((((((...&...)))))))))))))).......	AACCCCCGUGUCCCAAUCAUUGUC&AAAAAUGAUUGGGACACUCACAUU	143	3563.06	0.55513	39	1063.37	0.544799	3563.06	1063.37	yes
PC-5p-73873_114	TRINITY_DN101809_c0_g1	592	612	603	-28.9	-26.1	0.903114	1.5	1-16,612-597;18-21,595-592	17-17,596-596[SIL]	((((.((((((((((((((((&)))))))))))))))).))))	ACUACUAGACGUGUUCUAGAA&UUCUAGAACACGUUUAAUAGU	0	0	NA	2	54.5316	0.0573179	0	54.5316	yes
PC-5p-73873_114	TRINITY_DN101809_c0_g1	896	916	907	-28.9	-30.1	1	0	1-21,916-896	NA	(((((((((((((((((((((&)))))))))))))))))))))	ACUAUUAAACGUGUUCUAGAA&UUCUAGAACACGUUUAAUAGU	2	49.8331	0.0200457	1	27.2658	0.0317309	49.8331	27.2658	yes
PC-5p-73873_114	TRINITY_DN102296_c1_g1	194	215	205	-28.9	-19.4	0.67128	7.5	2-3,214-213;4-13,211-202;15-21,200-194	1-1,215-215[UP5];x-x,212-212[BULt];14-14,201-201[SIL]	(((((((.((((((((((.((.&.))-)))))))))).)))))))	GCUAUUGUGCGUGUUUUGUGAU&UUC-UAGAACACGUUUAAUAGU	1	24.9165	0.906672	0	0	NA	24.9165	0	yes
PC-5p-73873_114	TRINITY_DN107567_c2_g1	1160	1182	1171	-28.9	-19.26	0.666436	12.5	1-4,1182-1179;8-21,1173-1160	5-7,1178-1174[AILt]	((((((((((((((.....((((&))))--...))))))))))))))	GCUGUUAGACGUGUGCGAAAGGA&UUCU--AGAACACGUUUAAUAGU	0	0	NA	2	54.5316	0.75747	0	54.5316	yes
PC-5p-73873_114	TRINITY_DN112347_c1_g2	130	150	141	-28.9	-20.1	0.695502	8.5	2-11,149-140;13-18,138-133	1-1,150-150[UP5];12-12,139-139[SIL];19-21,132-130[UP3]	...((((((.((((((((((.&.)))))))))).))))))...	AUAGUUAGGGGUGUUCUGGAC&UUCUAGAACACGUUUAAUAGU	1	24.9165	0.688699	0	0	NA	24.9165	0	yes
PC-5p-73873_114	TRINITY_DN113874_c0_g1	52	72	63	-28.9	-26.1	0.903114	1.5	1-16,72-57;18-21,55-52	17-17,56-56[SIL]	((((.((((((((((((((((&)))))))))))))))).))))	ACUACUAGACGUGUUCUAGAA&UUCUAGAACACGUUUAAUAGU	5	124.583	0.00159988	4	109.063	0.0385866	124.583	109.063	yes
PC-5p-73873_114	TRINITY_DN117609_c1_g1	888	908	899	-28.9	-20.5	0.709343	7.5	3-15,906-894;18-20,891-889	1-2,908-907[UP5];16-17,893-892[SIL];21-21,888-888[UP3]	.(((..(((((((((((((..&..)))))))))))))..))).	UCUACGAAGCGUGUUCUGGUC&UUCUAGAACACGUUUAAUAGU	1	24.9165	0.594843	0	0	NA	24.9165	0	yes
PC-5p-73873_114	TRINITY_DN124047_c2_g1	65	91	82	-28.9	-19.2	0.66436	14	2-11,90-81;12-14,75-73;15-21,71-65	1-1,91-91[UP5];x-x,80-76[BULt];x-x,72-72[BULt]	(((((((.(((.....((((((((((.&.))))))))))-----)))-)))))))	GCUGUUACAACCUUCUGUGUUCUGGAU&UUCUAGAACAC-----GUU-UAAUAGU	1	24.9165	0.93595	0	0	NA	24.9165	0	yes
PC-5p-73873_114	TRINITY_DN124186_c3_g1	3696	3716	3707	-28.9	-19.7	0.681661	12.5	7-21,3710-3696	1-6,3716-3711[UP5]	(((((((((((((((......&......)))))))))))))))	GCUGUUGAACGUGUUGGUACU&UUCUAGAACACGUUUAAUAGU	4	99.6661	0.589743	0	0	NA	99.6661	0	yes
PC-5p-73873_114	TRINITY_DN124380_c0_g1	928	948	939	-28.9	-20.78	0.719031	8.5	1-4,948-945;8-21,941-928	5-7,944-942[SIL]	((((((((((((((...((((&))))...))))))))))))))	GCUGUUGAACGUGUAAGAGGA&UUCUAGAACACGUUUAAUAGU	2	49.8331	0.319371	0	0	NA	49.8331	0	yes
PC-5p-73873_114	TRINITY_DN124491_c4_g1	1605	1625	1616	-28.9	-21.3	0.737024	7	2-11,1624-1615;13-18,1613-1608	1-1,1625-1625[UP5];12-12,1614-1614[SIL];19-21,1607-1605[UP3]	...((((((.((((((((((.&.)))))))))).))))))...	UCAGUUGAAGGUGUUCUAGAU&UUCUAGAACACGUUUAAUAGU	2	49.8331	0.0881317	0	0	NA	49.8331	0	yes
PC-5p-73873_114	TRINITY_DN124910_c6_g1	1939	1962	1950	-28.9	-19.04	0.658824	13	3-6,1960-1957;8-21,1952-1939	1-2,1962-1961[UP5];7-7,1956-1953[AILt]	((((((((((((((....((((..&..))))---.))))))))))))))	ACUAUUGAGCGUGUCAUGCUGGCA&UUCUAG---AACACGUUUAAUAGU	1	24.9165	0.959231	0	0	NA	24.9165	0	yes
PC-5p-73907_114	TRINITY_DN104678_c1_g2	106	126	117	-33.8	-22.1	0.653846	6	1-20,126-107	21-21,106-106[UP3]	.((((((((((((((((((((&)))))))))))))))))))).	GUUUGGGAUUGCUUAUUUCAG&UUGAAAUAGGUGAUCUCGGAA	0	0	NA	4	109.063	0.051002	0	109.063	yes
PC-5p-73907_114	TRINITY_DN105868_c1_g2	836	856	847	-33.8	-22.1	0.653846	17	9-19,848-838	1-8,856-849[UP5];20-21,837-836[UP3]	..(((((((((((........&........)))))))))))..	AACCGAGAUCACCGUUCCACG&UUGAAAUAGGUGAUCUCGGAA	0	0	NA	1	27.2658	0.905002	0	27.2658	yes
PC-5p-73907_114	TRINITY_DN108847_c2_g2	327	347	338	-33.8	-24.4	0.721893	14	8-20,340-328	1-7,347-341[UP5];21-21,327-327[UP3]	.(((((((((((((.......&.......))))))))))))).	GUCCGAGAUCACCUCAAGUUA&UUGAAAUAGGUGAUCUCGGAA	0	0	NA	7	190.861	0.0071891	0	190.861	yes
PC-5p-73907_114	TRINITY_DN119581_c0_g7	780	800	791	-33.8	-22.1	0.653846	13.5	6-19,795-782	1-5,800-796[UP5];20-21,781-780[UP3]	..((((((((((((((.....&.....))))))))))))))..	UACCGAGGUCGCUUAUGCUGU&UUGAAAUAGGUGAUCUCGGAA	0	0	NA	4	109.063	0.75747	0	109.063	yes
PC-5p-73907_114	TRINITY_DN120777_c7_g3	1036	1056	1047	-33.8	-22.4	0.662722	17	9-19,1048-1038	1-8,1056-1049[UP5];20-21,1037-1036[UP3]	..(((((((((((........&........)))))))))))..	UGCCGAGAUCACCAGCAGUGC&UUGAAAUAGGUGAUCUCGGAA	0	0	NA	1	27.2658	0.840861	0	27.2658	yes
PC-5p-73907_114	TRINITY_DN96023_c0_g1	809	828	820	-33.8	-22.5	0.66568	7.5	2-6,827-823;8-19,822-811	1-1,828-828[UP5];7-7,x-x[BULq];20-21,810-809[UP3]	..((((((((((((-(((((.&.))))).))))))))))))..	CACCGGGAUCGCUU-UUUCAU&UUGAAAUAGGUGAUCUCGGAA	0	0	NA	2	54.5316	0.647532	0	54.5316	yes
PC-5p-775562_5	TRINITY_DN104946_c1_g1	505	529	520	-39.2	-26.2	0.668367	6.5	1-17,529-513;20-24,509-505	18-19,512-510[AILt]	(((((...(((((((((((((((((&)))))))))))))))))-..)))))	UGGAGGCAUGCAAGUCAUUUUCUUU&AAGGGAAAUGAUUUGUA-CACUCCA	0	0	NA	1	27.2658	0.567588	0	27.2658	yes
PC-5p-775562_5	TRINITY_DN111736_c0_g1	437	461	452	-39.2	-26.3	0.670918	9.5	4-17,458-445;19-23,442-438	1-3,461-459[UP5];18-18,444-443[AILt];24-24,437-437[UP3]	.(((((..((((((((((((((...&...))))))))))))))-.))))).	AGGAGUUCUGCAAAUCGUUUCCAUC&AAGGGAAAUGAUUUGUA-CACUCCA	0	0	NA	3	81.7974	0.016815	0	81.7974	yes
PC-5p-775562_5	TRINITY_DN115491_c0_g4	213	236	227	-39.2	-25.5	0.65051	14.5	2-7,235-230;15-23,222-214	1-1,236-236[UP5];8-14,229-223[SIL];24-24,213-213[UP3]	.(((((((((.......((((((.&.)))))).......))))))))).	AGGAGUGUGCUAAGAAGUUCCCUC&AAGGGAAAUGAUUUGUACACUCCA	4	99.6661	0.536744	9	245.392	0.526529	99.6661	245.392	yes
PC-5p-775562_5	TRINITY_DN122957_c3_g2	1215	1238	1229	-39.2	-25.6	0.653061	5.5	1-8,1238-1231;10-19,1229-1220;21-22,1218-1217	9-9,1230-1230[SIL];20-20,1219-1219[SIL];23-24,1216-1215[UP3]	..((.((((((((((.((((((((&)))))))).)))))))))).))..	AAGAAUGUGCAAAUCUUUUCCCUU&AAGGGAAAUGAUUUGUACACUCCA	1	24.9165	0.721944	1	27.2658	0.665908	24.9165	27.2658	yes
PC-5p-81117_103	TRINITY_DN100735_c0_g1	464	483	474	-30.6	-20	0.653595	8	1-9,483-475;11-17,473-467;19-21,466-464	10-10,474-474[SIL];18-18,x-x[BULq]	(((-(((((((.(((((((((&))))))))).))))))).)))	GAG-UUCGAGAAGAGCCGAGG&UUUCGGCUUAUUUUGAGACUU	2	49.8331	0.95658	0	0	NA	49.8331	0	yes
PC-5p-81117_103	TRINITY_DN101060_c1_g1	308	328	319	-30.6	-20.6	0.673203	8.5	3-4,326-325;6-9,323-320;11-21,318-308	1-2,328-327[UP5];5-5,324-324[SIL];10-10,319-319[SIL]	(((((((((((.((((.((..&..)).)))).)))))))))))	AAGUCUCAGAAAAAGCGGGCA&UUUCGGCUUAUUUUGAGACUU	0	0	NA	2	54.5316	0.885668	0	54.5316	yes
PC-5p-81117_103	TRINITY_DN101483_c0_g1	125	144	136	-30.6	-22.7	0.74183	9	3-8,142-137;11-21,135-125	1-2,144-143[UP5];9-10,136-136[AILq]	(((((((((((.-((((((..&..))))))..)))))))))))	GGGUCUCAAAAC-GGCCGAUC&UUUCGGCUUAUUUUGAGACUU	1	24.9165	0.940595	0	0	NA	24.9165	0	yes
PC-5p-81117_103	TRINITY_DN102686_c0_g1	1230	1251	1242	-30.6	-22.8	0.745098	8.5	3-16,1249-1236;17-21,1234-1230	1-2,1251-1250[UP5];x-x,1235-1235[BULt]	(((((.((((((((((((((..&..))))))))))))))-)))))	AAGUCAUCAGAGUGAGUCGGUA&UUUCGGCUUAUUUUGA-GACUU	0	0	NA	2	54.5316	0.443518	0	54.5316	yes
PC-5p-81117_103	TRINITY_DN103363_c2_g5	686	706	697	-30.6	-20.86	0.681699	10	2-9,705-698;14-21,693-686	1-1,706-706[UP5];10-13,697-694[SIL]	((((((((....((((((((.&.))))))))....))))))))	AAGUCUCAUGUAGAGCUGAAU&UUUCGGCUUAUUUUGAGACUU	1	24.9165	0.999706	2	54.5316	0.985734	24.9165	54.5316	yes
PC-5p-81117_103	TRINITY_DN103916_c2_g3	1469	1487	1480	-30.6	-20.4	0.666667	9	1-8,1487-1480;11-20,1479-1470	9-10,x-x[BULq];21-21,1469-1469[UP3]	.((((((((((--((((((((&))))))))..)))))))))).	CAGUCUCAAGA--AGUCGGGA&UUUCGGCUUAUUUUGAGACUU	6	149.499	0.157748	2	54.5316	0.997158	149.499	54.5316	yes
PC-5p-81117_103	TRINITY_DN103980_c0_g2	599	619	610	-30.6	-20.2	0.660131	13	5-9,615-611;11-19,609-601	1-4,619-616[UP5];10-10,610-610[SIL];20-21,600-599[UP3]	..(((((((((.(((((....&....))))).)))))))))..	UCGUCUCAAGAGAGGCCUUAC&UUUCGGCUUAUUUUGAGACUU	6	149.499	0.998977	8	218.126	0.998756	149.499	218.126	yes
PC-5p-81117_103	TRINITY_DN104375_c0_g3	57	77	68	-30.6	-20	0.653595	6.5	1-15,77-63;18-20,60-58	16-17,62-61[SIL];21-21,57-57[UP3]	.(((..(((((((((((((((&)))))))))))))))..))).	UGGUGACAAAAUGGGUCGAAA&UUUCGGCUUAUUUUGAGACUU	2	49.8331	0.947781	0	0	NA	49.8331	0	yes
PC-5p-81117_103	TRINITY_DN108425_c0_g1	660	683	674	-30.6	-20.1	0.656863	13	2-12,682-672;13-14,668-667;16-21,665-660	1-1,683-683[UP5];x-x,671-669[BULt];15-15,666-666[SIL]	((((((.((...(((((((((((.&.)))))))))))---)).))))))	GAGUCUGAGGAGGAUGAGCUGGAU&UUUCGGCUUAUU---UUGAGACUU	0	0	NA	1	27.2658	0.999991	0	27.2658	yes
PC-5p-81117_103	TRINITY_DN108725_c0_g1	332	352	343	-30.6	-21.6	0.705882	10	1-11,352-342;14-18,339-335	12-13,341-340[SIL];19-21,334-332[UP3]	...(((((..(((((((((((&)))))))))))..)))))...	AAAUCUCAUUAUGGGCCGGGA&UUUCGGCUUAUUUUGAGACUU	1	24.9165	0.995048	0	0	NA	24.9165	0	yes
PC-5p-81117_103	TRINITY_DN109291_c1_g1	368	389	379	-30.6	-20.8	0.679739	9.5	1-6,389-384;7-9,382-380;11-19,378-370	x-x,383-383[BULt];10-10,379-379[SIL];20-21,369-368[UP3]	..(((((((((.(((.((((((&))))))-))).)))))))))..	AUGUCUCAAGACAGGUCCGAGG&UUUCGG-CUUAUUUUGAGACUU	1	24.9165	0.999765	0	0	NA	24.9165	0	yes
PC-5p-81117_103	TRINITY_DN109341_c2_g3	427	447	438	-30.6	-22.1	0.722222	9	2-10,446-438;13-21,435-427	1-1,447-447[UP5];11-12,437-436[SIL]	(((((((((..(((((((((.&.)))))))))..)))))))))	AGGUUUCAAUUUGAGCUGGAG&UUUCGGCUUAUUUUGAGACUU	0	0	NA	1	27.2658	0.962709	0	27.2658	yes
PC-5p-81117_103	TRINITY_DN111299_c1_g3	682	707	693	-30.6	-20.6	0.673203	16	1-8,707-700;9-18,694-685	x-x,699-695[BULt];19-21,684-682[UP3]	...((((((((((.....((((((((&))))))))-----))))))))))...	CAUUCUCAAGGUAGGGGAAGCCGAGA&UUUCGGCU-----UAUUUUGAGACUU	1	24.9165	0.999924	0	0	NA	24.9165	0	yes
PC-5p-81117_103	TRINITY_DN112104_c0_g4	265	286	276	-30.6	-19.9	0.650327	7.5	1-5,286-282;6-16,280-270;19-21,267-265	x-x,281-281[BULt];17-18,269-268[SIL]	(((..(((((((((((.(((((&)))))-)))))))))))..)))	GAGGUUCAAGAUGAGCUUGAAA&UUUCG-GCUUAUUUUGAGACUU	1	24.9165	1	0	0	NA	24.9165	0	yes
PC-5p-81117_103	TRINITY_DN112463_c0_g1	14	33	24	-30.6	-21.7	0.70915	9.5	5-13,29-21;15-21,20-14	1-4,33-30[UP5];14-14,x-x[BULq]	(((((((-(((((((((....&....))))))))).)))))))	AGGUCUC-AAAUGAGCCAAUG&UUUCGGCUUAUUUUGAGACUU	0	0	NA	1	27.2658	0.984387	0	27.2658	yes
PC-5p-81117_103	TRINITY_DN112496_c0_g1	260	280	271	-30.6	-20.4	0.666667	10	3-18,278-263	1-2,280-279[UP5];19-21,262-260[UP3]	...((((((((((((((((..&..))))))))))))))))...	ACUUCUCAAGAUGAGUUGACU&UUUCGGCUUAUUUUGAGACUU	0	0	NA	2	54.5316	0.916827	0	54.5316	yes
PC-5p-81117_103	TRINITY_DN112583_c0_g1	259	279	270	-30.6	-20.2	0.660131	6	1-20,279-260	21-21,259-259[UP3]	.((((((((((((((((((((&)))))))))))))))))))).	CAGUUUUGGAGUAAGUUGAAA&UUUCGGCUUAUUUUGAGACUU	1	24.9165	0.999998	0	0	NA	24.9165	0	yes
PC-5p-81117_103	TRINITY_DN112628_c2_g2	62	89	80	-30.6	-19.9	0.650327	13	1-11,89-79;13-15,77-75;16-21,67-62	12-12,78-78[SIL];x-x,74-68[BULt]	((((((.......(((.(((((((((((&))))))))))).)))-------))))))	AAGUCUUUGUCCACGGUGUAGGCCGAGA&UUUCGGCUUAUUUUG-------AGACUU	2	49.8331	0.999785	0	0	NA	49.8331	0	yes
PC-5p-81117_103	TRINITY_DN113903_c1_g1	548	569	560	-30.6	-20	0.653595	10.5	4-15,566-555;17-20,552-549	1-3,569-567[UP5];16-16,554-553[AILt];21-21,548-548[UP3]	.((((..((((((((((((...&...))))))))))))-.)))).	UAGUCGAUAAAGUAGGCCGUCG&UUUCGGCUUAUUUUG-AGACUU	1	24.9165	1	0	0	NA	24.9165	0	yes
PC-5p-81117_103	TRINITY_DN114424_c1_g2	692	714	704	-30.6	-20.4	0.666667	10	1-4,714-711;6-12,708-702;13-21,700-692	5-5,710-709[AILt];x-x,701-701[BULt]	(((((((((.(((((((..((((&))))-.)))))))-)))))))))	GAGUCUCGAGGGUAAGCAAGGAA&UUUC-GGCUUAUU-UUGAGACUU	1	24.9165	0.99998	0	0	NA	24.9165	0	yes
PC-5p-81117_103	TRINITY_DN114577_c1_g1	623	647	638	-30.6	-20.7	0.676471	13	3-11,645-637;12-18,633-627;19-20,625-624	1-2,647-646[UP5];x-x,636-634[BULt];x-x,626-626[BULt];21-21,623-623[UP3]	.((.(((((((...(((((((((..&..)))))))))---)))))))-)).	CAGAUCUCAAAGUAGUGAGCCGAUU&UUUCGGCUUAU---UUUGAGA-CUU	0	0	NA	1	27.2658	0.999592	0	27.2658	yes
PC-5p-81117_103	TRINITY_DN114954_c1_g4	174	193	185	-30.6	-20.8	0.679739	10	4-9,190-185;11-19,184-176	1-3,193-191[UP5];10-10,x-x[BULq];20-21,175-174[UP3]	..(((((((((-((((((...&...)))))).)))))))))..	AUGUCUCAAAG-AAGCCGCCU&UUUCGGCUUAUUUUGAGACUU	1	24.9165	0.999782	0	0	NA	24.9165	0	yes
PC-5p-81117_103	TRINITY_DN116124_c2_g2	1479	1498	1490	-30.6	-20.7	0.676471	7.5	2-9,1497-1490;11-21,1489-1479	1-1,1498-1498[UP5];10-10,x-x[BULq]	(((((((((((-((((((((.&.)))))))).)))))))))))	GAGUCUUGAAG-AGGCUGAAG&UUUCGGCUUAUUUUGAGACUU	0	0	NA	1	27.2658	0.999535	0	27.2658	yes
PC-5p-81117_103	TRINITY_DN116167_c0_g1	682	702	693	-30.6	-23.8	0.777778	5.5	1-5,702-698;7-14,696-689;16-21,687-682	6-6,697-697[SIL];15-15,688-688[SIL]	((((((.((((((((.(((((&))))).)))))))).))))))	AAGUCUGAGAGUGAGGCGAAA&UUUCGGCUUAUUUUGAGACUU	1	24.9165	0.829551	0	0	NA	24.9165	0	yes
PC-5p-81117_103	TRINITY_DN116885_c2_g1	2619	2640	2630	-30.6	-21.7	0.70915	13	1-9,2640-2632;14-19,2626-2621	10-13,2631-2627[AILt];20-21,2620-2619[UP3]	..((((((.....(((((((((&)))))))))-....))))))..	CUGUCUCAUCCGGAGGCCGAGA&UUUCGGCUU-AUUUUGAGACUU	0	0	NA	1	27.2658	0.984882	0	27.2658	yes
PC-5p-81117_103	TRINITY_DN117357_c1_g1	3148	3170	3161	-30.6	-23	0.751634	8	2-13,3169-3158;14-21,3155-3148	1-1,3170-3170[UP5];x-x,3157-3156[BULt]	((((((((..((((((((((((.&.))))))))))))--))))))))	AAGUCUCGAGGAGUGGGCUGAAC&UUUCGGCUUAUUU--UGAGACUU	0	0	NA	3	81.7974	0.710486	0	81.7974	yes
PC-5p-81117_103	TRINITY_DN117769_c3_g1	1346	1365	1357	-30.6	-20.1	0.656863	7.5	1-8,1365-1358;11-21,1356-1346	9-10,1357-1357[AILq]	(((((((((((.-((((((((&))))))))..)))))))))))	GAGUCUCAGAAC-AGUUGAAG&UUUCGGCUUAUUUUGAGACUU	2	49.8331	0.999496	0	0	NA	49.8331	0	yes
PC-5p-81117_103	TRINITY_DN117880_c1_g1	1398	1422	1409	-30.6	-22.7	0.74183	13.5	1-8,1422-1415;9-19,1410-1400	x-x,1414-1411[BULt];20-21,1399-1398[UP3]	..(((((((((((....((((((((&))))))))----)))))))))))..	AUGUCUCAAGAUAUGGAAGCCGGGG&UUUCGGCU----UAUUUUGAGACUU	1	24.9165	0.933493	0	0	NA	24.9165	0	yes
PC-5p-81117_103	TRINITY_DN118930_c2_g1	655	675	666	-30.6	-19.9	0.650327	6.5	1-4,675-672;7-12,669-664;14-21,662-655	5-6,671-670[SIL];13-13,663-663[SIL]	((((((((.((((((..((((&))))..)))))).))))))))	AGGUCUCAUGAUAAGAGGAAA&UUUCGGCUUAUUUUGAGACUU	0	0	NA	3	81.7974	0.999757	0	81.7974	yes
PC-5p-81117_103	TRINITY_DN119022_c2_g1	3703	3723	3714	-30.6	-19.9	0.650327	10	2-4,3722-3720;6-17,3718-3707	1-1,3723-3723[UP5];5-5,3719-3719[SIL];18-21,3706-3703[UP3]	....((((((((((((.(((.&.))).))))))))))))....	UCCACUCAAAGUGAGCGGGAG&UUUCGGCUUAUUUUGAGACUU	0	0	NA	1	27.2658	0.999999	0	27.2658	yes
PC-5p-81117_103	TRINITY_DN119242_c2_g1	721	741	732	-30.6	-21.3	0.696078	6.5	1-7,741-735;10-16,732-726;18-21,724-721	8-9,734-733[SIL];17-17,725-725[SIL]	((((.(((((((..(((((((&)))))))..))))))).))))	GAGUGUCAAAAUUUGUCGAAA&UUUCGGCUUAUUUUGAGACUU	0	0	NA	2	54.5316	0.965421	0	54.5316	yes
PC-5p-81117_103	TRINITY_DN119387_c1_g2	437	462	453	-30.6	-20.9	0.683007	11	2-13,461-450;14-20,444-438	1-1,462-462[UP5];x-x,449-445[BULt];21-21,437-437[UP3]	.(((((((.....((((((((((((.&.))))))))))))-----))))))).	UGGUUUCGGGUGGGGAUGAGCCGAAU&UUUCGGCUUAUUU-----UGAGACUU	0	0	NA	1	27.2658	0.998609	0	27.2658	yes
PC-5p-81117_103	TRINITY_DN119391_c1_g3	205	225	216	-30.6	-25.6	0.836601	6	1-14,225-212;16-21,210-205	15-15,211-211[SIL]	((((((.((((((((((((((&)))))))))))))).))))))	GAGUCUGAGAGUGAGUCGGAA&UUUCGGCUUAUUUUGAGACUU	2	49.8331	0.162079	3	81.7974	0.363986	49.8331	81.7974	yes
PC-5p-81117_103	TRINITY_DN120419_c0_g1	2234	2254	2245	-30.6	-20.1	0.656863	9	3-10,2252-2245;13-14,2242-2241;16-21,2239-2234	1-2,2254-2253[UP5];11-12,2244-2243[SIL];15-15,2240-2240[SIL]	((((((.((..((((((((..&..))))))))..)).))))))	AAGUCUGAACCUAAGCCGGCU&UUUCGGCUUAUUUUGAGACUU	1	24.9165	0.999999	0	0	NA	24.9165	0	yes
PC-5p-81117_103	TRINITY_DN120493_c0_g2	1596	1616	1607	-30.6	-19.9	0.650327	10	3-17,1614-1600	1-2,1616-1615[UP5];18-21,1599-1596[UP3]	....(((((((((((((((..&..)))))))))))))))....	UCGACUCAAAAUGAGUCGGCC&UUUCGGCUUAUUUUGAGACUU	1	24.9165	1	1	27.2658	0.999998	24.9165	27.2658	yes
PC-5p-81117_103	TRINITY_DN121571_c0_g1	705	725	716	-30.6	-19.9	0.650327	7	1-9,725-717;11-16,715-710;18-21,708-705	10-10,716-716[SIL];17-17,709-709[SIL]	((((.((((((.(((((((((&))))))))).)))))).))))	AGGUGUUGGAAAAGGCCGAGA&UUUCGGCUUAUUUUGAGACUU	1	24.9165	1	0	0	NA	24.9165	0	yes
PC-5p-81117_103	TRINITY_DN122110_c0_g2	344	366	357	-30.6	-20.88	0.682353	7.5	1-14,366-353;17-21,348-344	15-16,352-349[AILt]	(((((....((((((((((((((&))))))))))))))--..)))))	AAGUUGGGAAAGGUGAGCCGAAA&UUUCGGCUUAUUUU--GAGACUU	3	74.7496	0.98714	0	0	NA	74.7496	0	yes
PC-5p-81117_103	TRINITY_DN122201_c0_g2	64	83	74	-30.6	-20.6	0.673203	5.5	1-15,83-69;18-21,67-64	16-17,68-68[AILq]	((((.-(((((((((((((((&)))))))))))))))..))))	AAGUG-CAGAGUAAGCUGGAA&UUUCGGCUUAUUUUGAGACUU	1	24.9165	0.99993	0	0	NA	24.9165	0	yes
PC-5p-81117_103	TRINITY_DN124205_c3_g1	2649	2673	2664	-30.6	-20.1	0.656863	13	2-11,2672-2663;12-15,2657-2654;17-21,2653-2649	1-1,2673-2673[UP5];x-x,2662-2658[BULt];16-16,x-x[BULq]	(((((-((((.....((((((((((.&.))))))))))-----)))).)))))	AAGUC-CAAAGGGUUAUGAGCCGAAU&UUUCGGCUUAU-----UUUGAGACUU	2	49.8331	0.999304	0	0	NA	49.8331	0	yes
PC-5p-81117_103	TRINITY_DN124946_c1_g3	3136	3156	3147	-30.6	-23.1	0.754902	8	3-14,3154-3143;16-21,3141-3136	1-2,3156-3155[UP5];15-15,3142-3142[SIL]	((((((.((((((((((((..&..)))))))))))).))))))	AAGUCUGAAGAUGAGCUGGUU&UUUCGGCUUAUUUUGAGACUU	0	0	NA	1	27.2658	0.855535	0	27.2658	yes
PC-5p-81117_103	TRINITY_DN125000_c3_g4	179	200	190	-30.6	-20	0.653595	10	2-9,199-192;11-18,189-182	1-1,200-200[UP5];10-10,191-190[AILt];19-21,181-179[UP3]	...((((((((..((((((((.&.))))))))-.))))))))...	GCAUCUCAAGGAGAAGCCGAAC&UUUCGGCUU-AUUUUGAGACUU	0	0	NA	2	54.5316	0.99964	0	54.5316	yes
PC-5p-81117_103	TRINITY_DN125222_c6_g1	40	60	51	-30.6	-19.9	0.650327	11.5	5-16,56-45;18-21,43-40	1-4,60-57[UP5];17-17,44-44[SIL]	((((.((((((((((((....&....)))))))))))).))))	GAGUAUCAAGAUGGGCCUGAU&UUUCGGCUUAUUUUGAGACUU	0	0	NA	2	54.5316	0.99983	0	54.5316	yes
PC-5p-81117_103	TRINITY_DN90499_c0_g1	64	82	75	-30.6	-20.3	0.663399	10	1-8,82-75;11-20,74-65	9-10,x-x[BULq];21-21,64-64[UP3]	.((((((((((--((((((((&))))))))..)))))))))).	UAGUCUCAAGA--GGUCGGGA&UUUCGGCUUAUUUUGAGACUU	1	24.9165	0.999992	1	27.2658	0.999957	24.9165	27.2658	yes
PC-5p-81117_103	TRINITY_DN91548_c1_g5	41	61	52	-30.6	-20.4	0.666667	10.5	3-4,59-58;6-7,56-55;9-21,53-41	1-2,61-60[UP5];5-5,57-57[SIL];8-8,54-54[SIL]	(((((((((((((.((.((..&..)).)).)))))))))))))	GGGUCUCAGAGUACGUGGACA&UUUCGGCUUAUUUUGAGACUU	0	0	NA	4	109.063	0.99654	0	109.063	yes
PC-5p-81117_103	TRINITY_DN91752_c0_g1	911	934	925	-30.6	-21.8	0.712418	14.5	5-10,930-925;11-21,921-911	1-4,934-931[UP5];x-x,924-922[BULt]	(((((((((((...((((((....&....))))))---)))))))))))	GAGUCUCAAAAAUUUGAGCCAGUG&UUUCGGCUUA---UUUUGAGACUU	1	24.9165	0.988229	0	0	NA	24.9165	0	yes
PC-5p-81117_103	TRINITY_DN91811_c1_g1	1204	1223	1215	-30.6	-20.5	0.669935	8.5	3-9,1221-1215;11-21,1214-1204	1-2,1223-1222[UP5];10-10,x-x[BULq]	(((((((((((-(((((((..&..))))))).)))))))))))	AGGUCUUGAAA-GAGCCGGUU&UUUCGGCUUAUUUUGAGACUU	1	24.9165	0.999969	0	0	NA	24.9165	0	yes
PC-5p-81117_103	TRINITY_DN93327_c0_g1	250	270	261	-30.6	-22.6	0.738562	8	2-17,269-254	1-1,270-270[UP5];18-21,253-250[UP3]	....((((((((((((((((.&.))))))))))))))))....	GCUACUCAAGAUGAGCUGAAG&UUUCGGCUUAUUUUGAGACUU	1	24.9165	0.957667	0	0	NA	24.9165	0	yes
PC-5p-81117_103	TRINITY_DN94729_c2_g2	182	206	193	-30.6	-20.8	0.679739	11.5	1-9,206-198;10-19,193-184	x-x,197-194[BULt];20-21,183-182[UP3]	..((((((((((....(((((((((&)))))))))----))))))))))..	GCGUCUUGGAAUUAAAAAGCCGAAA&UUUCGGCUU----AUUUUGAGACUU	0	0	NA	1	27.2658	0.999359	0	27.2658	yes
PC-5p-81117_103	TRINITY_DN97242_c0_g2	567	588	579	-30.6	-20	0.653595	8.5	1-12,588-577;13-18,575-570	x-x,576-576[BULt];19-21,569-567[UP3]	...((((((.((((((((((((&))))))))))))-))))))...	UGUUCUCAAUGAUGAGUCGAAG&UUUCGGCUUAUU-UUGAGACUU	1	24.9165	1	0	0	NA	24.9165	0	yes
PC-5p-81117_103	TRINITY_DN97801_c1_g2	2346	2366	2357	-30.6	-19.9	0.650327	9.5	3-9,2364-2358;12-20,2355-2347	1-2,2366-2365[UP5];10-11,2357-2356[SIL];21-21,2346-2346[UP3]	.(((((((((..(((((((..&..)))))))..))))))))).	CAGUUUCAAGUCAAGCCGAUA&UUUCGGCUUAUUUUGAGACUU	1	24.9165	1	0	0	NA	24.9165	0	yes
PC-5p-81117_103	TRINITY_DN97801_c1_g2	2561	2579	2571	-30.6	-21.8	0.712418	7.5	1-9,2579-2571;12-14,2570-2568;16-21,2566-2561	10-11,x-x[BULq];15-15,2567-2567[SIL]	((((((.(((--(((((((((&)))))))))..))).))))))	GAGUCUGAAA--GAGCCGAGA&UUUCGGCUUAUUUUGAGACUU	1	24.9165	0.989874	0	0	NA	24.9165	0	yes
PC-5p-81117_103	TRINITY_DN98141_c1_g1	201	221	212	-30.6	-20.6	0.673203	12.5	5-7,217-215;9-19,213-203	1-4,221-218[UP5];8-8,214-214[SIL];20-21,202-201[UP3]	..(((((((((((.(((....&....))).)))))))))))..	GCGUCUCAGGAUAUGCCUUGA&UUUCGGCUUAUUUUGAGACUU	0	0	NA	2	54.5316	0.883737	0	54.5316	yes
PC-5p-81117_103	TRINITY_DN98324_c0_g1	1418	1439	1429	-30.6	-21.5	0.702614	7.5	1-8,1439-1432;9-15,1430-1424;17-20,1422-1419	x-x,1431-1431[BULt];16-16,1423-1423[SIL];21-21,1418-1418[UP3]	.((((.(((((((.((((((((&))))))))-))))))).)))).	CAGUCGUAGAGUGAAGCCGAAG&UUUCGGCU-UAUUUUGAGACUU	0	0	NA	1	27.2658	0.991262	0	27.2658	yes
PC-5p-81117_103	TRINITY_DN98504_c0_g9	49	70	60	-30.6	-22.2	0.72549	9.5	3-5,68-66;6-19,64-51	1-2,70-69[UP5];x-x,65-65[BULt];20-21,50-49[UP3]	..((((((((((((((.(((..&..)))-))))))))))))))..	UCGUUUCAAGAUGAGCGCGAUG&UUUCG-GCUUAUUUUGAGACUU	0	0	NA	1	27.2658	0.958922	0	27.2658	yes
PC-5p-81117_103	TRINITY_DN99165_c0_g1	872	893	884	-30.6	-22.8	0.745098	5	2-9,892-885;11-17,883-877;18-21,875-872	1-1,893-893[UP5];10-10,884-884[SIL];x-x,876-876[BULt]	((((.(((((((.((((((((.&.)))))))).)))))))-))))	AAGUGCUCAAAAAAGGCCGAAG&UUUCGGCUUAUUUUGAG-ACUU	2	49.8331	0.420662	4	109.063	0.752651	49.8331	109.063	yes
PC-5p-81117_103	TRINITY_DN99517_c0_g1	417	437	428	-30.6	-21	0.686275	12	5-7,433-431;9-19,429-419	1-4,437-434[UP5];8-8,430-430[SIL];20-21,418-417[UP3]	..(((((((((((.(((....&....))).)))))))))))..	GCGUCUCAAGAUAUGCCUUGA&UUUCGGCUUAUUUUGAGACUU	0	0	NA	1	27.2658	0.997885	0	27.2658	yes
PC-5p-838_6216	TRINITY_DN100161_c0_g2	1732	1752	1743	-29.9	-23.2	0.77592	12	6-21,1747-1732	1-5,1752-1748[UP5]	((((((((((((((((.....&.....))))))))))))))))	GGGUUGUUGUGGAUGGAAAAC&UAAACCUAUCUAUAACAACCU	1	24.9165	0.339062	1	27.2658	0.298615	24.9165	27.2658	yes
PC-5p-838_6216	TRINITY_DN102026_c0_g1	467	486	477	-29.9	-19.6	0.655518	7.5	3-10,484-477;12-14,476-474;16-21,472-467	1-2,486-485[UP5];11-11,x-x[BULq];15-15,473-473[SIL]	((((((.(((-((((((((..&..)))))))).))).))))))	GGGUUGCUAU-GAUGGGUUAG&UAAACCUAUCUAUAACAACCU	0	0	NA	1	27.2658	0.997081	0	27.2658	yes
PC-5p-838_6216	TRINITY_DN102923_c1_g1	305	325	316	-29.9	-19.5	0.652174	14.5	7-21,319-305	1-6,325-320[UP5]	(((((((((((((((......&......)))))))))))))))	GGGUUGUUAUGGGUGAUCAUA&UAAACCUAUCUAUAACAACCU	0	0	NA	1	27.2658	0.998564	0	27.2658	yes
PC-5p-838_6216	TRINITY_DN104859_c4_g2	621	641	632	-29.9	-19.5	0.652174	15	7-21,635-621	1-6,641-636[UP5]	(((((((((((((((......&......)))))))))))))))	GGGUUGUUGUGGGUGUUUUGU&UAAACCUAUCUAUAACAACCU	1	24.9165	0.999421	0	0	NA	24.9165	0	yes
PC-5p-838_6216	TRINITY_DN109233_c1_g4	952	972	963	-29.9	-20.6	0.688963	8.5	3-6,970-967;8-11,965-962;13-21,960-952	1-2,972-971[UP5];7-7,966-966[SIL];12-12,961-961[SIL]	(((((((((.((((.((((..&..)))).)))).)))))))))	GGGUUGUUAAGGAUUGGUUGU&UAAACCUAUCUAUAACAACCU	15	373.748	0.817489	13	354.455	0.808474	373.748	354.455	yes
PC-5p-838_6216	TRINITY_DN110978_c2_g2	580	605	596	-29.9	-20.9	0.698997	16	3-10,603-596;11-20,590-581	1-2,605-604[UP5];x-x,595-591[BULt];21-21,580-580[UP3]	.((((((((((.....((((((((..&..))))))))-----)))))))))).	UGGUUGUUAUACUUGUGGUGGGUUGG&UAAACCUAUC-----UAUAACAACCU	2	49.8331	0.747655	0	0	NA	49.8331	0	yes
PC-5p-838_6216	TRINITY_DN111977_c0_g1	763	783	774	-29.9	-20.3	0.67893	11.5	5-16,779-768;19-20,765-764	1-4,783-780[UP5];17-18,767-766[SIL];21-21,763-763[UP3]	.((..((((((((((((....&....))))))))))))..)).	UGGAGGUUGUGGAUAGGAAGC&UAAACCUAUCUAUAACAACCU	0	0	NA	6	163.595	0.878187	0	163.595	yes
PC-5p-838_6216	TRINITY_DN114076_c0_g3	329	349	340	-29.9	-19.6	0.655518	12.5	6-12,344-338;15-21,335-329	1-5,349-345[UP5];13-14,337-336[SIL]	(((((((..(((((((.....&.....)))))))..)))))))	GGGUUGUGUUAGAUGGAUAUU&UAAACCUAUCUAUAACAACCU	1	24.9165	0.998399	0	0	NA	24.9165	0	yes
PC-5p-838_6216	TRINITY_DN114912_c0_g2	507	527	518	-29.9	-20.9	0.698997	11	4-8,524-520;11-21,517-507	1-3,527-525[UP5];9-10,519-518[SIL]	(((((((((((..(((((...&...)))))..)))))))))))	GGGUUGUUGUAUUUGGGUAUG&UAAACCUAUCUAUAACAACCU	1	24.9165	0.906672	0	0	NA	24.9165	0	yes
PC-5p-838_6216	TRINITY_DN117845_c2_g1	634	654	645	-29.9	-22.1	0.73913	3	1-14,654-641;16-19,639-636	15-15,640-640[SIL];20-21,635-634[UP3]	..((((.((((((((((((((&)))))))))))))).))))..	UUGUUGCUAUAGAUAGGUUUA&UAAACCUAUCUAUAACAACCU	3	74.7496	0.0160012	0	0	NA	74.7496	0	yes
PC-5p-838_6216	TRINITY_DN118737_c0_g1	1139	1164	1150	-29.9	-20.8	0.695652	17.5	4-6,1161-1159;7-20,1153-1140	1-3,1164-1162[UP5];x-x,1158-1154[BULt];21-21,1139-1139[UP3]	.((((((((((((((.....(((...&...)))-----)))))))))))))).	CGGUUGUUGUGGAUAUUGAUGGUGAU&UAAACC-----UAUCUAUAACAACCU	7	174.416	0.752713	0	0	NA	174.416	0	yes
PC-5p-838_6216	TRINITY_DN119618_c1_g3	359	380	370	-29.9	-19.5	0.652174	12.5	4-7,377-374;8-10,372-370;13-21,367-359	1-3,380-378[UP5];x-x,373-373[BULt];11-12,369-368[SIL]	(((((((((..(((.((((...&...))))-)))..)))))))))	GGGUUGUUAGUGGUGAGGUGAA&UAAACCU-AUCUAUAACAACCU	0	0	NA	1	27.2658	0.998418	0	27.2658	yes
PC-5p-838_6216	TRINITY_DN120567_c0_g1	364	384	375	-29.9	-19.6	0.655518	14.5	7-21,378-364	1-6,384-379[UP5]	(((((((((((((((......&......)))))))))))))))	AGGUUGUUGUGGGUGAGCUUG&UAAACCUAUCUAUAACAACCU	1	24.9165	0.998816	1	27.2658	0.996886	24.9165	27.2658	yes
PC-5p-838_6216	TRINITY_DN121542_c2_g1	1575	1596	1587	-29.9	-20.5	0.685619	12.5	5-11,1592-1586;13-21,1583-1575	1-4,1596-1593[UP5];12-12,1585-1584[AILt]	(((((((((..(((((((....&....)))))))-.)))))))))	GGGUUGUUACCAGAUGGGAGAG&UAAACCUAUCU-AUAACAACCU	0	0	NA	1	27.2658	0.958922	0	27.2658	yes
PC-5p-838_6216	TRINITY_DN122535_c2_g2	809	830	820	-29.9	-19.6	0.655518	10.5	4-7,827-824;8-17,822-813;19-21,811-809	1-3,830-828[UP5];x-x,823-823[BULt];18-18,812-812[SIL]	(((.((((((((((.((((...&...))))-)))))))))).)))	AGGGUGUUGUGGGUAAGGUGAU&UAAACCU-AUCUAUAACAACCU	1	24.9165	0.998674	1	27.2658	0.99657	24.9165	27.2658	yes
PC-5p-838_6216	TRINITY_DN123513_c1_g1	1477	1496	1487	-29.9	-21.1	0.705686	9.5	5-17,1492-1480;19-20,1479-1478	1-4,1496-1493[UP5];18-18,x-x[BULq];21-21,1477-1477[UP3]	.((-(((((((((((((....&....))))))))))))).)).	UGG-UGUUGUAGAUAGGCUAG&UAAACCUAUCUAUAACAACCU	0	0	NA	1	27.2658	0.840861	0	27.2658	yes
PC-5p-838_6216	TRINITY_DN124906_c3_g4	3385	3405	3396	-29.9	-22.4	0.749164	4	1-7,3405-3399;9-16,3397-3390;18-21,3388-3385	8-8,3398-3398[SIL];17-17,3389-3389[SIL]	((((.((((((((.(((((((&))))))).)))))))).))))	AGGUGGUUAUGGAAAGGUUUA&UAAACCUAUCUAUAACAACCU	0	0	NA	1	27.2658	0.508058	0	27.2658	yes
PC-5p-838_6216	TRINITY_DN125076_c7_g1	4103	4126	4117	-29.9	-21.6	0.722408	9	4-18,4123-4109;19-20,4105-4104	1-3,4126-4124[UP5];x-x,4108-4106[BULt];21-21,4103-4103[UP3]	.((...(((((((((((((((...&...)))))))))))))))---)).	UGGACAUUGUUAUAGAUAGGUGUG&UAAACCUAUCUAUAACAA---CCU	1	24.9165	0.79425	0	0	NA	24.9165	0	yes
PC-5p-838_6216	TRINITY_DN70951_c0_g1	184	209	200	-29.9	-20.1	0.672241	7.5	1-6,209-204;8-14,202-196;15-21,190-184	7-7,203-203[SIL];x-x,195-191[BULt]	(((((((.....(((((((.((((((&)))))).)))))))-----)))))))	AGGUUGUGGGUUUAUAGAUUGGUUUG&UAAACCUAUCUAUA-----ACAACCU	1	24.9165	0.990249	0	0	NA	24.9165	0	yes
PC-5p-838_6216	TRINITY_DN95166_c1_g1	1325	1345	1336	-29.9	-21.1	0.705686	11.5	5-16,1341-1330;19-21,1327-1325	1-4,1345-1342[UP5];17-18,1329-1328[SIL]	(((..((((((((((((....&....))))))))))))..)))	AGGAGGUUGUGGAUGGGAAUU&UAAACCUAUCUAUAACAACCU	1	24.9165	0.864012	1	27.2658	0.818953	24.9165	27.2658	yes
PC-5p-838_6216	TRINITY_DN96267_c1_g1	779	804	790	-29.9	-19.62	0.656187	19	4-7,801-798;9-21,791-779	1-3,804-802[UP5];8-8,797-792[AILt]	(((((((((((((......((((...&...))))-----.)))))))))))))	GGGUUGUUGUGGAGCAAAAAGGUGAU&UAAACCU-----AUCUAUAACAACCU	0	0	NA	1	27.2658	0.995701	0	27.2658	yes
PC-5p-838_6216	TRINITY_DN98859_c3_g1	647	667	658	-29.9	-24.7	0.826087	5	3-19,665-649	1-2,667-666[UP5];20-21,648-647[UP3]	..(((((((((((((((((..&..)))))))))))))))))..	AUGUUGUUAUAGAUAGGUUGA&UAAACCUAUCUAUAACAACCU	126	3139.48	0.00172679	59	1608.68	0.00180214	3139.48	1608.68	yes
PC-5p-88306_94	TRINITY_DN109436_c0_g1	605	625	616	-33.1	-21.8	0.65861	7	1-4,625-622;7-21,619-605	5-6,621-620[SIL]	(((((((((((((((..((((&))))..)))))))))))))))	AAUUUUGAGGUCAUCCUUUUC&GAAAUAGGUGAUCUCGGAAUU	3	74.7496	0.467643	0	0	NA	74.7496	0	yes
PC-5p-88306_94	TRINITY_DN111114_c4_g1	218	238	229	-33.1	-22.7	0.685801	7.5	3-16,236-223;18-20,221-219	1-2,238-237[UP5];17-17,222-222[SIL];21-21,218-218[UP3]	.(((.((((((((((((((..&..)))))))))))))).))).	UGUUGUGGGGUCACCUAUUAU&GAAAUAGGUGAUCUCGGAAUU	1	24.9165	0.751638	0	0	NA	24.9165	0	yes
PC-5p-88306_94	TRINITY_DN112503_c3_g1	21	41	32	-33.1	-23	0.694864	14	7-20,35-22	1-6,41-36[UP5];21-21,21-21[UP3]	.((((((((((((((......&......)))))))))))))).	CAUUCCGAGAUCGCUAGUGAG&GAAAUAGGUGAUCUCGGAAUU	1	24.9165	0.624227	0	0	NA	24.9165	0	yes
PC-5p-88306_94	TRINITY_DN119021_c0_g2	797	817	808	-33.1	-22.5	0.679758	7	2-9,816-809;11-19,807-799	1-1,817-817[UP5];10-10,808-808[SIL];20-21,798-797[UP3]	..(((((((((.((((((((.&.)))))))).)))))))))..	ACUUUCGGGAUGACCUGUUUA&GAAAUAGGUGAUCUCGGAAUU	1	24.9165	0.823012	0	0	NA	24.9165	0	yes
PC-5p-88306_94	TRINITY_DN119581_c0_g7	778	798	789	-33.1	-22.1	0.667674	12	4-17,795-782	1-3,798-796[UP5];18-21,781-778[UP3]	....((((((((((((((...&...))))))))))))))....	GUUACCGAGGUCGCUUAUGCU&GAAAUAGGUGAUCUCGGAAUU	0	0	NA	1	27.2658	0.873016	0	27.2658	yes
PC-5p-88306_94	TRINITY_DN119949_c0_g1	426	446	437	-33.1	-21.98	0.664048	12	1-2,446-445;6-6,441-441;8-19,439-428	3-5,444-442[SIL];7-7,440-440[SIL];20-21,427-426[UP3]	..((((((((((((.(...((&))...).))))))))))))..	GUUUCCGAGGUCGCGUUAGUC&GAAAUAGGUGAUCUCGGAAUU	0	0	NA	1	27.2658	0.901889	0	27.2658	yes
PC-5p-88306_94	TRINITY_DN91364_c0_g1	450	472	461	-33.1	-27	0.81571	7	1-5,472-468;6-19,465-452	x-x,467-466[BULt];20-21,451-450[UP3]	..((((((((((((((..(((((&)))))--))))))))))))))..	GCUUCCGAGGUCACCUCAAUUUC&GAAAU--AGGUGAUCUCGGAAUU	1	24.9165	0.0725256	0	0	NA	24.9165	0	yes
PC-5p-88306_94	TRINITY_DN98235_c1_g2	307	326	317	-33.1	-22.9	0.691843	11	5-10,322-317;12-21,316-307	1-4,326-323[UP5];11-11,x-x[BULq]	((((((((((-((((((....&....)))))).))))))))))	GGUUCCGAGA-CACCUGCUGC&GAAAUAGGUGAUCUCGGAAUU	0	0	NA	1	27.2658	0.619914	0	27.2658	yes
PC-5p-90363_91	TRINITY_DN101237_c2_g1	1179	1203	1194	-37	-24.9	0.672973	10	4-7,1200-1197;9-15,1195-1189;16-23,1187-1180	1-3,1203-1201[UP5];8-8,1196-1196[SIL];x-x,1188-1188[BULt];24-24,1179-1179[UP3]	.((((((((.(((((((.((((...&...)))).)))))))-)))))))).	AUUUGGAGGAGAUGUAUCUGCACAC&AAUUGCAUAUAUAUC-CCUCCAAAG	1	24.9165	0.688699	0	0	NA	24.9165	0	yes
PC-5p-90363_91	TRINITY_DN102379_c0_g1	1215	1238	1229	-37	-24.2	0.654054	6	2-12,1237-1227;14-15,1226-1225;16-24,1223-1215	1-1,1238-1238[UP5];13-13,x-x[BULq];x-x,1224-1224[BULt]	(((((((((.((-(((((((((((.&.))))))))))).))-)))))))))	UUUUGGAGGUGG-AUAUGUGUAAUA&AAUUGCAUAUAUAUC-CCUCCAAAG	0	0	NA	1	27.2658	0.840861	0	27.2658	yes
PC-5p-90363_91	TRINITY_DN104049_c0_g1	508	538	522	-37	-25.9	0.7	21	2-8,537-531;9-20,523-512	1-1,538-538[UP5];x-x,530-524[BULt];21-24,511-508[UP3]	....((((((((((((.......(((((((.&.)))))))-------))))))))))))....	AAGAGGAGGGAUAUAUGCUUUGGGUGCAGUG&AAUUGCAU-------AUAUAUCCCUCCAAAG	1	24.9165	0.510933	0	0	NA	24.9165	0	yes
PC-5p-90363_91	TRINITY_DN107568_c0_g1	1400	1424	1415	-37	-24.7	0.667568	8.5	3-4,1422-1421;6-14,1419-1411;15-23,1409-1401	1-2,1424-1423[UP5];5-5,1420-1420[SIL];x-x,1410-1410[BULt];24-24,1400-1400[UP3]	.(((((((((.(((((((((.((..&..)).)))))))))-))))))))).	AUUUGGGGGGAAUAUAUAUGGAGGG&AAUUGCAUAUAUAU-CCCUCCAAAG	2	49.8331	0.564048	0	0	NA	49.8331	0	yes
PC-5p-90363_91	TRINITY_DN107586_c2_g2	630	653	644	-37	-27	0.72973	6	2-11,652-643;13-14,641-640;16-24,638-630	1-1,653-653[UP5];12-12,642-642[SIL];15-15,639-639[SIL]	(((((((((.((.((((((((((.&.)))))))))).)).)))))))))	CUUUGGAGGUAUUUAUGUGCAGUA&AAUUGCAUAUAUAUCCCUCCAAAG	0	0	NA	1	27.2658	0.251891	0	27.2658	yes
PC-5p-90363_91	TRINITY_DN109503_c2_g3	546	569	560	-37	-26.3	0.710811	7	1-12,569-558;14-20,556-550;23-24,547-546	13-13,557-557[SIL];21-22,549-548[SIL]	((..(((((((.((((((((((((&)))))))))))).)))))))..))	CUAGGGAGGGAGGUAUAUGUGGUU&AAUUGCAUAUAUAUCCCUCCAAAG	2	49.8331	0.261948	0	0	NA	49.8331	0	yes
PC-5p-90363_91	TRINITY_DN94478_c0_g1	389	411	402	-37	-24.9	0.672973	13	5-10,407-402;12-22,401-391	1-4,411-408[UP5];11-11,x-x[BULq];23-24,390-389[UP3]	..(((((((((((-((((((....&....)))))).)))))))))))..	AAUUGGAGGGAUG-GUAUGCCCUU&AAUUGCAUAUAUAUCCCUCCAAAG	0	0	NA	2	54.5316	0.24775	0	54.5316	yes
PC-5p-93150_88	TRINITY_DN100433_c0_g1	1534	1555	1546	-35.6	-26.3	0.738764	10.5	6-15,1550-1541;16-21,1539-1534	1-5,1555-1551[UP5];x-x,1540-1540[BULt]	((((((.((((((((((.....&.....))))))))))-))))))	UGGAUGAGGUGGAUGCAGCCCU&CAAAAUGCAUCCAUC-CAUCCA	2	49.8331	0.0596531	0	0	NA	49.8331	0	yes
PC-5p-93150_88	TRINITY_DN100484_c1_g4	101	120	111	-35.6	-24.7	0.69382	10.5	6-13,115-108;15-21,107-101	1-5,120-116[UP5];14-14,x-x[BULq]	(((((((-((((((((.....&.....)))))))).)))))))	UGGGUGG-UGGAUGCACGUUA&CAAAAUGCAUCCAUCCAUCCA	1	24.9165	0.891506	2	54.5316	0.68678	24.9165	54.5316	yes
PC-5p-93150_88	TRINITY_DN100711_c2_g1	604	625	615	-35.6	-25.7	0.72191	12	6-7,620-619;8-21,617-604	1-5,625-621[UP5];x-x,618-618[BULt]	((((((((((((((.((.....&.....))-))))))))))))))	UGGGUGGGUGGAUGACAACAUA&CAAAAUG-CAUCCAUCCAUCCA	0	0	NA	5	136.329	0.00957397	0	136.329	yes
PC-5p-93150_88	TRINITY_DN103620_c0_g1	390	420	411	-35.6	-24.7	0.69382	12	1-14,420-407;15-17,405-403;18-20,393-391	x-x,406-406[BULt];x-x,402-394[BULt];21-21,390-390[UP3]	.(((.........(((.((((((((((((((&))))))))))))))-)))---------))).	AGGAUCUUCUAUUUGGUAUGGAUGCGUUUUG&CAAAAUGCAUCCAU-CCA---------UCCA	0	0	NA	1	27.2658	0.83026	0	27.2658	yes
PC-5p-93150_88	TRINITY_DN106035_c0_g2	611	630	621	-35.6	-23.7	0.66573	7	1-3,630-628;5-6,626-625;8-13,623-618;15-21,617-611	4-4,627-627[SIL];7-7,624-624[SIL];14-14,x-x[BULq]	(((((((-((((((.((.(((&))).)).)))))).)))))))	UGGAUGG-UGGGUGGGUCUUG&CAAAAUGCAUCCAUCCAUCCA	2	49.8331	0.902575	0	0	NA	49.8331	0	yes
PC-5p-93150_88	TRINITY_DN108698_c0_g1	1251	1271	1262	-35.6	-23.7	0.66573	4.5	1-3,1271-1269;5-15,1267-1257;18-21,1254-1251	4-4,1268-1268[SIL];16-17,1256-1255[SIL]	((((..(((((((((((.(((&))).)))))))))))..))))	UGGGAAGAUGGAUGCAUCUUG&CAAAAUGCAUCCAUCCAUCCA	1	24.9165	0.985246	0	0	NA	24.9165	0	yes
PC-5p-93150_88	TRINITY_DN109118_c0_g1	680	701	692	-35.6	-23.3	0.654494	12	5-6,697-696;8-13,694-689;14-20,687-681	1-4,701-698[UP5];7-7,695-695[SIL];x-x,688-688[BULt];21-21,680-680[UP3]	.(((((((.((((((.((....&....)).))))))-))))))).	CGGAUGGAUUGGAUGGGUCGGA&CAAAAUGCAUCCA-UCCAUCCA	7	174.416	0.700926	1	27.2658	0.99367	174.416	27.2658	yes
PC-5p-93150_88	TRINITY_DN109381_c2_g1	2045	2065	2056	-35.6	-25.2	0.707865	10	5-19,2061-2047	1-4,2065-2062[UP5];20-21,2046-2045[UP3]	..(((((((((((((((....&....)))))))))))))))..	UCGAUGGAUGGAUGUAUCUUU&CAAAAUGCAUCCAUCCAUCCA	0	0	NA	7	190.861	0.456615	0	190.861	yes
PC-5p-93150_88	TRINITY_DN110432_c2_g1	493	514	505	-35.6	-26.1	0.733146	11	5-12,510-503;14-20,500-494	1-4,514-511[UP5];13-13,502-501[AILt];21-21,493-493[UP3]	.(((((((..((((((((....&....))))))))-.))))))).	CGGAUGGAGAGGAUGCAUAUGA&CAAAAUGCAUCC-AUCCAUCCA	0	0	NA	1	27.2658	0.32087	0	27.2658	yes
PC-5p-93150_88	TRINITY_DN112446_c0_g1	1327	1347	1338	-35.6	-23.9	0.671348	5	1-13,1347-1335;15-17,1334-1332;19-21,1329-1327	14-14,x-x[BULq];18-18,1331-1330[AILt]	(((..(((-(((((((((((((&))))))))))))).)))-.)))	UGGUCUGG-UGGAUGUGUUUUG&CAAAAUGCAUCCAUCCA-UCCA	0	0	NA	1	27.2658	0.94852	0	27.2658	yes
PC-5p-93150_88	TRINITY_DN114900_c0_g4	8	27	18	-35.6	-24.7	0.69382	10.5	6-13,22-15;15-21,14-8	1-5,27-23[UP5];14-14,x-x[BULq]	(((((((-((((((((.....&.....)))))))).)))))))	UGGGUGG-UGGAUGCACUCUG&CAAAAUGCAUCCAUCCAUCCA	0	0	NA	1	27.2658	0.840861	0	27.2658	yes
PC-5p-93150_88	TRINITY_DN114912_c0_g2	1251	1271	1262	-35.6	-25.3	0.710674	8.5	4-16,1268-1256;18-21,1254-1251	1-3,1271-1269[UP5];17-17,1255-1255[SIL]	((((.(((((((((((((...&...))))))))))))).))))	UGGAAGGGUGGGUGUAUUAUU&CAAAAUGCAUCCAUCCAUCCA	2	49.8331	0.193678	0	0	NA	49.8331	0	yes
PC-5p-93150_88	TRINITY_DN116292_c0_g1	451	472	463	-35.6	-24.9	0.699438	13	7-16,466-457;17-20,455-452	1-6,472-467[UP5];x-x,456-456[BULt];21-21,451-451[UP3]	.((((.((((((((((......&......))))))))))-)))).	AGGAUAGGAUGGAUGCUUCAGG&CAAAAUGCAUCCAUCC-AUCCA	0	0	NA	1	27.2658	0.773108	0	27.2658	yes
PC-5p-93150_88	TRINITY_DN120001_c1_g3	345	366	357	-35.6	-24.7	0.69382	12	6-14,361-353;15-20,351-346	1-5,366-362[UP5];x-x,352-352[BULt];21-21,345-345[UP3]	.((((((.(((((((((.....&.....)))))))))-)))))).	AGGGUGGCGUGGAUGCACUUUC&CAAAAUGCAUCCAU-CCAUCCA	2	49.8331	0.664947	1	27.2658	0.824698	49.8331	27.2658	yes
PC-5p-93150_88	TRINITY_DN121126_c0_g1	2103	2126	2117	-35.6	-23.4	0.657303	9	4-13,2123-2114;14-17,2111-2108;18-20,2106-2104	1-3,2126-2124[UP5];x-x,2113-2112[BULt];x-x,2107-2107[BULt];21-21,2103-2103[UP3]	.(((.((((..((((((((((...&...))))))))))--))))-))).	AGGAUUGGAAUUGGAUGCAUUACG&CAAAAUGCAUCCA--UCCA-UCCA	1	24.9165	0.995577	0	0	NA	24.9165	0	yes
PC-5p-93150_88	TRINITY_DN122035_c0_g1	802	822	814	-35.6	-24.9	0.699438	5.5	1-5,822-818;7-14,817-810;15-20,808-803	6-6,x-x[BULq];x-x,809-809[BULt];21-21,802-802[UP3]	.((((((.((((((((-(((((&))))).))))))))-)))))).	AGGGUGGAAUGGAUGU-UUUUG&CAAAAUGCAUCCAU-CCAUCCA	1	24.9165	0.801851	1	27.2658	0.750063	24.9165	27.2658	yes
PC-5p-93150_88	TRINITY_DN122358_c1_g1	631	650	641	-35.6	-24	0.674157	6	1-6,650-645;9-12,642-639;14-21,638-631	7-8,644-643[SIL];13-13,x-x[BULq]	((((((((-((((..((((((&))))))..)))).))))))))	UGGAUGGA-GGAUCGGUUUUG&CAAAAUGCAUCCAUCCAUCCA	0	0	NA	3	81.7974	0.804669	0	81.7974	yes
PC-5p-93150_88	TRINITY_DN122439_c0_g2	575	595	586	-35.6	-23.6	0.662921	11	5-6,591-590;8-9,588-587;11-21,585-575	1-4,595-592[UP5];7-7,589-589[SIL];10-10,586-586[SIL]	(((((((((((.((.((....&....)).)).)))))))))))	UGGAUGGAUGGUUGGAUGAAG&CAAAAUGCAUCCAUCCAUCCA	0	0	NA	2	54.5316	0.627691	0	54.5316	yes
PC-5p-93150_88	TRINITY_DN122964_c3_g1	771	791	782	-35.6	-25.3	0.710674	11.5	6-12,786-780;14-20,778-772	1-5,791-787[UP5];13-13,779-779[SIL];21-21,771-771[UP3]	.(((((((.(((((((.....&.....))))))).))))))).	AGGAUGGGCGGAUGCAACUAU&CAAAAUGCAUCCAUCCAUCCA	1	24.9165	0.664357	0	0	NA	24.9165	0	yes
PC-5p-93150_88	TRINITY_DN90275_c0_g1	762	791	779	-35.6	-24.9	0.699438	13	1-4,791-788;5-13,784-776;14-20,769-763	x-x,787-785[BULt];x-x,775-770[BULt];21-21,762-762[UP3]	.(((((((......(((((((((...((((&))))---)))))))))------))))))).	GGGAUGGAACCAUUUGGAUGCAUGCCUUUG&CAAA---AUGCAUCCA------UCCAUCCA	5	124.583	0.572787	0	0	NA	124.583	0	yes
PC-5p-93150_88	TRINITY_DN93793_c0_g1	385	408	399	-35.6	-23.6	0.662921	9	3-14,406-395;15-20,391-386	1-2,408-407[UP5];x-x,394-392[BULt];21-21,385-385[UP3]	.((((((...((((((((((((..&..))))))))))))---)))))).	AGGAUGGUUCAUGGAUGUGUUUCA&CAAAAUGCAUCCAU---CCAUCCA	1	24.9165	0.987777	0	0	NA	24.9165	0	yes
ahy-miR159	TRINITY_DN100037_c0_g2	1025	1045	1036	-36.5	-24.1	0.660274	6.5	1-3,1045-1043;5-21,1041-1025	4-4,1042-1042[SIL]	(((((((((((((((((.(((&))).)))))))))))))))))	UAGAGUUUUCUUCGAUUGGAA&UUUGGAUUGAAGGGAGCUCUA	34	847.162	0.947995	16	436.253	0.943449	847.162	436.253	yes
ahy-miR159	TRINITY_DN101868_c2_g2	690	711	701	-36.5	-24.9	0.682192	12	3-9,709-703;12-20,699-691	1-2,711-710[UP5];10-11,702-700[AILt];21-21,690-690[UP3]	.(((((((((...(((((((..&..)))))))-..))))))))).	AAGAGCUCCUAAACGAUCCAUU&UUUGGAUUG-AAGGGAGCUCUA	0	0	NA	1	27.2658	0.939514	0	27.2658	yes
ahy-miR159	TRINITY_DN102411_c1_g1	549	571	562	-36.5	-24.1	0.660274	5.5	1-5,571-567;7-13,565-559;14-15,557-556;16-20,554-550	6-6,566-566[SIL];x-x,558-558[BULt];x-x,555-555[BULt];21-21,549-549[UP3]	.(((((.((.(((((((.(((((&))))).)))))))-))-))))).	AAGAGCUUCACCUUCAAACCAAG&UUUGGAUUGAAGG-GA-GCUCUA	1	24.9165	0.995407	0	0	NA	24.9165	0	yes
ahy-miR159	TRINITY_DN104021_c0_g1	172	194	185	-36.5	-24.3	0.665753	8.5	3-6,192-189;8-12,187-183;13-13,181-181;14-21,179-172	1-2,194-193[UP5];7-7,188-188[SIL];x-x,182-182[BULt];x-x,180-180[BULt]	((((((((.(.(((((.((((..&..)))).)))))-)-))))))))	UAGGGCUCGCACUUCAUUCCACA&UUUGGAUUGAAG-G-GAGCUCUA	0	0	NA	1	27.2658	0.986712	0	27.2658	yes
ahy-miR159	TRINITY_DN104795_c0_g1	1353	1374	1364	-36.5	-23.9	0.654795	10	2-7,1373-1368;8-19,1366-1355	1-1,1374-1374[UP5];x-x,1367-1367[BULt];20-21,1354-1353[UP3]	..((((((((((((.((((((.&.))))))-))))))))))))..	UUGGGCUUCCUUUACGUCCGGG&UUUGGAU-UGAAGGGAGCUCUA	6	149.499	0.968653	11	299.924	0.965421	149.499	299.924	yes
ahy-miR159	TRINITY_DN105491_c1_g3	372	394	383	-36.5	-25.2	0.690411	8	1-9,394-386;11-13,382-380;15-20,378-373	10-10,385-383[AILt];14-14,379-379[SIL];21-21,372-372[UP3]	.((((((.(((...(((((((((&)))))))))--.))).)))))).	AAGAGCUGCCUGGGCAAUCCAAA&UUUGGAUUG--AAGGGAGCUCUA	1	24.9165	0.925541	0	0	NA	24.9165	0	yes
ahy-miR159	TRINITY_DN108680_c0_g1	758	778	769	-36.5	-25	0.684932	7	1-5,778-774;7-10,772-769;12-21,767-758	6-6,773-773[SIL];11-11,768-768[SIL]	((((((((((.((((.(((((&))))).)))).))))))))))	UGGAGCUUCCCUCAAGCCGGA&UUUGGAUUGAAGGGAGCUCUA	1	24.9165	0.948899	0	0	NA	24.9165	0	yes
ahy-miR159	TRINITY_DN109315_c2_g1	777	797	788	-36.5	-28.3	0.775342	8	3-8,795-790;10-21,788-777	1-2,797-796[UP5];9-9,789-789[SIL]	((((((((((((.((((((..&..)))))).))))))))))))	UGGGGCUCCUUUGAGUCCAUG&UUUGGAUUGAAGGGAGCUCUA	1	24.9165	0.287379	0	0	NA	24.9165	0	yes
ahy-miR159	TRINITY_DN109406_c1_g1	414	435	425	-36.5	-23.9	0.654795	7	2-8,434-428;9-21,426-414	1-1,435-435[UP5];x-x,427-427[BULt]	(((((((((((((.(((((((.&.)))))))-)))))))))))))	UGGGGUUUCUUUCAAGUCCAAU&UUUGGAUU-GAAGGGAGCUCUA	0	0	NA	1	27.2658	0.994949	0	27.2658	yes
ahy-miR159	TRINITY_DN109489_c2_g3	316	336	327	-36.5	-26.9	0.736986	7	2-14,335-323;17-20,320-317	1-1,336-336[UP5];15-16,322-321[SIL];21-21,316-316[UP3]	.((((..(((((((((((((.&.)))))))))))))..)))).	AGGGGACCCCUUCAGUCCAGU&UUUGGAUUGAAGGGAGCUCUA	0	0	NA	1	27.2658	0.475288	0	27.2658	yes
ahy-miR159	TRINITY_DN109657_c0_g1	393	419	405	-36.5	-23.82	0.652603	15	1-9,419-411;11-13,404-402;14-20,400-394	10-10,410-405[AILt];x-x,401-401[BULt];21-21,393-393[UP3]	.(((((((.(((......(((((((((&)))))))))-----.)))-))))))).	CAGAGCUCACCUGCCAAACAGUCCAAA&UUUGGAUUG-----AAGG-GAGCUCUA	0	0	NA	1	27.2658	0.996221	0	27.2658	yes
ahy-miR159	TRINITY_DN110349_c1_g5	1497	1517	1508	-36.5	-26.9	0.736986	7	2-14,1516-1504;17-20,1501-1498	1-1,1517-1517[UP5];15-16,1503-1502[SIL];21-21,1497-1497[UP3]	.((((..(((((((((((((.&.)))))))))))))..)))).	AGGGGACCCCUUCAGUCCAGU&UUUGGAUUGAAGGGAGCUCUA	0	0	NA	1	27.2658	0.491937	0	27.2658	yes
ahy-miR159	TRINITY_DN111936_c0_g1	266	286	277	-36.5	-25.3	0.693151	6	1-13,286-274;15-19,272-268	14-14,273-273[SIL];20-21,267-266[UP3]	..(((((.(((((((((((((&))))))))))))).)))))..	AUGGGCUGUUUUCAGUCCAAA&UUUGGAUUGAAGGGAGCUCUA	1	24.9165	0.91012	0	0	NA	24.9165	0	yes
ahy-miR159	TRINITY_DN112629_c1_g1	208	229	221	-36.5	-24.6	0.673973	7.5	2-6,228-224;9-15,222-216;16-21,213-208	1-1,229-229[UP5];7-8,223-223[AILq];x-x,215-214[BULt]	((((((..(((((((.-(((((.&.)))))..)))))))--))))))	UAGGGCCUUCCCUUCU-UCCAAG&UUUGGAUUGAAGGGA--GCUCUA	0	0	NA	1	27.2658	0.970244	0	27.2658	yes
ahy-miR159	TRINITY_DN113307_c2_g1	73	94	86	-36.5	-24.6	0.673973	7.5	2-6,93-89;9-15,87-81;16-21,78-73	1-1,94-94[UP5];7-8,88-88[AILq];x-x,80-79[BULt]	((((((..(((((((.-(((((.&.)))))..)))))))--))))))	UAGGGCCUUCCCUUCU-UCCAAG&UUUGGAUUGAAGGGA--GCUCUA	3	74.7496	0.0798885	0	0	NA	74.7496	0	yes
ahy-miR159	TRINITY_DN118023_c0_g1	189	209	200	-36.5	-24.4	0.668493	6	2-5,208-205;7-21,203-189	1-1,209-209[UP5];6-6,204-204[SIL]	(((((((((((((((.((((.&.)))).)))))))))))))))	UGGAGCUUCCUUUAAAUCAAU&UUUGGAUUGAAGGGAGCUCUA	0	0	NA	1	27.2658	0.980433	0	27.2658	yes
ahy-miR159	TRINITY_DN121899_c1_g2	1062	1082	1073	-36.5	-25.7	0.70411	8	3-14,1080-1069;16-20,1067-1063	1-2,1082-1081[UP5];15-15,1068-1068[SIL];21-21,1062-1062[UP3]	.(((((.((((((((((((..&..)))))))))))).))))).	CGGAGUACCCUUUAGUCCAUU&UUUGGAUUGAAGGGAGCUCUA	1	24.9165	0.869036	0	0	NA	24.9165	0	yes
ahy-miR159	TRINITY_DN121984_c0_g2	1019	1042	1034	-36.5	-24.1	0.660274	9	2-7,1041-1036;9-15,1035-1029;16-19,1024-1021	1-1,1042-1042[UP5];8-8,x-x[BULq];x-x,1028-1025[BULt];20-21,1020-1019[UP3]	..((((....(((((((-((((((.&.)))))).)))))))----))))..	CCGAGCCAAAUCCCUUC-AUCCAAG&UUUGGAUUGAAGGGA----GCUCUA	1	24.9165	0.996049	0	0	NA	24.9165	0	yes
ahy-miR159	TRINITY_DN97601_c0_g1	1922	1942	1933	-36.5	-24.4	0.668493	5.5	1-4,1942-1939;6-19,1937-1924	5-5,1938-1938[SIL];20-21,1923-1922[UP3]	..((((((((((((((.((((&)))).))))))))))))))..	GUGAGUUCCCUUCAAUAUAAA&UUUGGAUUGAAGGGAGCUCUA	1	24.9165	0.990609	3	81.7974	0.912817	24.9165	81.7974	yes
ahy-miR159	TRINITY_DN98672_c2_g5	88	108	99	-36.5	-27.4	0.750685	6	2-14,107-95;17-20,92-89	1-1,108-108[UP5];15-16,94-93[SIL];21-21,88-88[UP3]	.((((..(((((((((((((.&.)))))))))))))..)))).	AGGGGGACCCUUCAGUCCAAU&UUUGGAUUGAAGGGAGCUCUA	2	49.8331	0.0881317	0	0	NA	49.8331	0	yes
aly-miR158a-3p	TRINITY_DN100597_c2_g2	323	342	333	-32.7	-22.6	0.691131	8	2-4,341-339;7-14,336-329;17-20,326-323	1-1,342-342[UP5];5-6,338-337[SIL];15-16,328-327[SIL]	((((..((((((((..(((.&.)))..))))))))..))))	UGCUGCGUCUACGUGGGGGU&UCCCAAAUGUAGACAAAGCA	4	99.6661	0.235926	0	0	NA	99.6661	0	yes
aly-miR158a-3p	TRINITY_DN103402_c1_g1	567	585	577	-32.7	-22.6	0.691131	4.5	1-6,585-580;8-16,579-571;18-19,569-568	7-7,x-x[BULq];17-17,570-570[SIL];20-20,567-567[UP3]	.((.(((((((((-((((((&)))))).))))))))).)).	GGUAUUGUCUACA-UUGGGA&UCCCAAAUGUAGACAAAGCA	1	24.9165	0.711277	0	0	NA	24.9165	0	yes
aly-miR158a-3p	TRINITY_DN109576_c3_g2	1305	1323	1315	-32.7	-21.4	0.654434	6	1-9,1323-1315;11-17,1314-1308	10-10,x-x[BULq];18-20,1307-1305[UP3]	...(((((((-(((((((((&))))))))).)))))))...	UCAUUUGUCU-CGUUUGGGA&UCCCAAAUGUAGACAAAGCA	1	24.9165	0.940595	0	0	NA	24.9165	0	yes
aly-miR158a-3p	TRINITY_DN114514_c2_g1	2665	2683	2674	-32.7	-23.4	0.715596	5	2-12,2682-2672;14-19,2671-2666	1-1,2683-2683[UP5];13-13,x-x[BULq];20-20,2665-2665[UP3]	.((((((-(((((((((((.&.))))))))))).)))))).	GGCUUUG-CUAUGUUUGGGU&UCCCAAAUGUAGACAAAGCA	1	24.9165	0.529002	0	0	NA	24.9165	0	yes
aly-miR158a-3p	TRINITY_DN119995_c0_g1	534	553	544	-32.7	-21.6	0.66055	5.5	1-6,553-548;8-16,546-538;19-20,535-534	7-7,547-547[SIL];17-18,537-536[SIL]	((..(((((((((.((((((&)))))).)))))))))..))	UGGGUUGUCUGCAGUUGGGG&UCCCAAAUGUAGACAAAGCA	0	0	NA	1	27.2658	0.884725	0	27.2658	yes
aly-miR158a-3p	TRINITY_DN124774_c3_g3	65	90	78	-32.7	-22	0.672783	11	2-6,89-85;7-16,81-72;17-19,68-66	1-1,90-90[UP5];x-x,84-82[BULt];x-x,71-69[BULt];20-20,65-65[UP3]	.(((...((((((((((...(((((.&.)))))---))))))))))---))).	AGCUAACUUGUCUACAUAUAUUGGGG&UCCCAA---AUGUAGACAA---AGCA	1	24.9165	0.841913	0	0	NA	24.9165	0	yes
aly-miR158a-3p	TRINITY_DN80889_c0_g1	1121	1143	1133	-32.7	-21.3	0.651376	5	1-3,1143-1141;4-13,1139-1130;15-20,1126-1121	x-x,1140-1140[BULt];14-14,1129-1127[AILt]	((((((...((((((((((.(((&)))-))))))))))--.))))))	UGCUUUCCAUCUACAUUUGAGGA&UCC-CAAAUGUAGA--CAAAGCA	3	74.7496	0.47172	0	0	NA	74.7496	0	yes
aly-miR158a-3p	TRINITY_DN91507_c0_g3	528	557	548	-32.7	-21.7	0.663609	13	1-13,557-545;14-19,534-529	x-x,544-535[BULt];20-20,528-528[UP3]	.((((((..........(((((((((((((&)))))))))))))----------)))))).	AGCUUUGAACAACCGUCUUUACGUUUGGGA&UCCCAAAUGUAGA----------CAAAGCA	0	0	NA	6	163.595	0.710486	0	163.595	yes
aly-miR158a-3p	TRINITY_DN93401_c0_g1	1402	1425	1412	-32.7	-21.74	0.664832	14	1-8,1425-1418;12-20,1410-1402	9-11,1417-1411[AILt]	(((((((((.......((((((((&))))))))----...)))))))))	UGCUUUGUCAUUUCAAAUUUGGGA&UCCCAAAU----GUAGACAAAGCA	1	24.9165	0.887344	3	81.7974	0.680556	24.9165	81.7974	yes
aly-miR158a-3p	TRINITY_DN93683_c0_g1	252	274	262	-32.7	-22.04	0.674006	9.5	1-5,274-270;7-20,265-252	6-6,269-266[AILt]	((((((((((((((....(((((&)))))---.))))))))))))))	UGUUUUGUUUACAUCAUCUGGGA&UCCCA---AAUGUAGACAAAGCA	8	199.332	0.613923	3	81.7974	0.325334	199.332	81.7974	yes
aly-miR166a-3p	TRINITY_DN100608_c0_g1	1011	1031	1022	-44.1	-37.9	0.85941	3	2-19,1030-1013	1-1,1031-1031[UP5];20-21,1012-1011[UP3]	..((((((((((((((((((.&.))))))))))))))))))..	CUGGAAUGAAGCCUGGUCCGG&UCGGACCAGGCUUCAUUCCCC	0	0	NA	4	109.063	0.000737032	0	109.063	yes
aly-miR166a-3p	TRINITY_DN114449_c0_g1	1240	1259	1250	-44.1	-32.4	0.734694	4	2-10,1258-1250;12-16,1249-1245;18-21,1243-1240	1-1,1259-1259[UP5];11-11,x-x[BULq];17-17,1244-1244[SIL]	((((.(((((-(((((((((.&.))))))))).))))).))))	GGGGCAUGAA-CCUGGUCCGU&UCGGACCAGGCUUCAUUCCCC	4	99.6661	0.199679	2	54.5316	0.194611	99.6661	54.5316	yes
aly-miR166a-3p	TRINITY_DN116772_c1_g3	432	452	443	-44.1	-37.4	0.848073	3.5	2-19,451-434	1-1,452-452[UP5];20-21,433-432[UP3]	..((((((((((((((((((.&.))))))))))))))))))..	CUGGGAUGAAGCCUGGUCCGG&UCGGACCAGGCUUCAUUCCCC	102	2541.49	0.00287632	67	1826.81	0.00300176	2541.49	1826.81	yes
aly-miR166a-3p	TRINITY_DN117311_c0_g2	185	214	205	-44.1	-29.7	0.673469	23	1-3,214-212;6-12,209-203;13-21,193-185	4-5,211-210[SIL];x-x,202-194[BULt]	(((((((((.........(((((((..(((&)))..)))))))---------)))))))))	GGGGGAUGGUUUUGGCUAAGCCUGGGUCGA&UCGGACCAGGCU---------UCAUUCCCC	12	298.998	0.224086	17	463.518	0.241425	298.998	463.518	yes
aly-miR166a-3p	TRINITY_DN122344_c1_g2	596	616	607	-44.1	-32.1	0.727891	6.5	1-7,616-610;9-20,608-597	8-8,609-609[SIL];21-21,596-596[UP3]	.((((((((((((.(((((((&))))))).)))))))))))).	UGGGAGUGAGGCCAGGUUUGA&UCGGACCAGGCUUCAUUCCCC	1	24.9165	0.386997	0	0	NA	24.9165	0	yes
aly-miR166a-3p	TRINITY_DN95455_c0_g2	50	71	61	-44.1	-33.3	0.755102	5	2-5,70-67;6-19,65-52	1-1,71-71[UP5];x-x,66-66[BULt];20-21,51-50[UP3]	..((((((((((((((.((((.&.))))-))))))))))))))..	UUGGAAUGAAGCCUGGUUCCGU&UCGGA-CCAGGCUUCAUUCCCC	36	896.995	0.00345059	18	490.784	0.111351	896.995	490.784	yes
aly-miR166g-5p	TRINITY_DN105504_c0_g1	13	39	31	-38.4	-25.3	0.658854	10.5	1-3,39-37;5-16,36-25;17-21,17-13	4-4,x-x[BULq];x-x,24-18[BULt]	(((((.......((((((((((((-(((&))).))))))))))))-------)))))	UCUCGUACAUGAAGCCAAACAGCA-UCC&GGAAUGUUGUUUGGCU-------CGAGG	2	49.8331	0.507038	0	0	NA	49.8331	0	yes
aly-miR166g-5p	TRINITY_DN105818_c1_g1	1362	1383	1373	-38.4	-26.4	0.6875	10	1-4,1383-1380;6-9,1378-1375;12-21,1371-1362	5-5,1379-1379[SIL];10-11,1374-1372[AILt]	((((((((((...((((.((((&)))).))))-..))))))))))	CCUCGGGCCACCUCAGCUUUCU&GGAAUGUUG-UUUGGCUCGAGG	0	0	NA	1	27.2658	0.643652	0	27.2658	yes
aly-miR166g-5p	TRINITY_DN108272_c6_g1	264	285	276	-38.4	-25.5	0.664062	7.5	2-10,284-276;11-15,273-269;17-21,268-264	1-1,285-285[UP5];x-x,275-274[BULt];16-16,x-x[BULq]	(((((-(((((..(((((((((.&.)))))))))--))))).)))))	CCUUG-GCCGACUACAACAUUCA&GGAAUGUUGU--UUGGCUCGAGG	2	49.8331	0.420662	0	0	NA	49.8331	0	yes
aly-miR166g-5p	TRINITY_DN110708_c3_g1	11	32	23	-38.4	-25.5	0.664062	7.5	2-10,31-23;11-15,20-16;17-21,15-11	1-1,32-32[UP5];x-x,22-21[BULt];16-16,x-x[BULq]	(((((-(((((..(((((((((.&.)))))))))--))))).)))))	CCUUG-GCCGACUACAACAUUCA&GGAAUGUUGU--UUGGCUCGAGG	2	49.8331	0.429502	0	0	NA	49.8331	0	yes
aly-miR166g-5p	TRINITY_DN110843_c0_g2	1563	1585	1574	-38.4	-25.7	0.669271	9	1-8,1585-1578;9-17,1575-1567;19-21,1565-1563	x-x,1577-1576[BULt];18-18,1566-1566[SIL]	(((.(((((((((..((((((((&))))))))--))))))))).)))	CUUGGAGCUGAACUUGGCAUUCC&GGAAUGUU--GUUUGGCUCGAGG	0	0	NA	1	27.2658	0.873016	0	27.2658	yes
aly-miR166g-5p	TRINITY_DN112759_c0_g2	289	313	304	-38.4	-27.06	0.704688	15.5	1-10,313-304;13-21,297-289	11-12,303-298[AILt]	(((((((((......((((((((((&))))))))))----..)))))))))	CCUUGAGCUUCAAUUGCAGCAUUCU&GGAAUGUUGU----UUGGCUCGAGG	2	49.8331	0.291241	0	0	NA	49.8331	0	yes
aly-miR166g-5p	TRINITY_DN114347_c0_g1	599	627	618	-38.4	-25.1	0.653646	12	1-3,627-625;5-13,623-615;14-20,606-600	4-4,624-624[SIL];x-x,614-607[BULt];21-21,599-599[UP3]	.(((((((........(((((((((.(((&))).)))))))))--------))))))).	GCUCGAGCUAAAGAAACAAACAGCACUCC&GGAAUGUUGUUUG--------GCUCGAGG	1	24.9165	0.983482	3	81.7974	0.882887	24.9165	81.7974	yes
aly-miR166g-5p	TRINITY_DN117234_c0_g1	322	342	333	-38.4	-28.2	0.734375	6.5	1-5,342-338;7-19,336-324	6-6,337-337[SIL];20-21,323-322[UP3]	..(((((((((((((.(((((&))))).)))))))))))))..	AAUCGGGCCAAAUAAGGUUCC&GGAAUGUUGUUUGGCUCGAGG	0	0	NA	4	109.063	0.111351	0	109.063	yes
aly-miR166g-5p	TRINITY_DN121522_c1_g1	29	50	41	-38.4	-25.7	0.669271	6	1-11,50-40;13-16,38-35;17-20,33-30	12-12,39-39[SIL];x-x,34-34[BULt];21-21,29-29[UP3]	.((((.((((.(((((((((((&))))))))))).))))-)))).	ACUUGAAGCCUAGCAACAUUCU&GGAAUGUUGUUUGGCU-CGAGG	1	24.9165	0.873874	0	0	NA	24.9165	0	yes
aly-miR166g-5p	TRINITY_DN122113_c2_g1	179	200	191	-38.4	-25	0.651042	5	1-16,200-185;17-20,183-180	x-x,184-184[BULt];21-21,179-179[UP3]	.((((.((((((((((((((((&))))))))))))))))-)))).	ACUUGAAGCCAAGUAACAUUCU&GGAAUGUUGUUUGGCU-CGAGG	9	224.249	0.580536	1	27.2658	0.973845	224.249	27.2658	yes
aly-miR166g-5p	TRINITY_DN123375_c3_g1	3495	3515	3506	-38.4	-25.9	0.674479	4	2-16,3514-3500;18-21,3498-3495	1-1,3515-3515[UP5];17-17,3499-3499[SIL]	((((.(((((((((((((((.&.))))))))))))))).))))	CUUCAAGUCAGACAACAUUCA&GGAAUGUUGUUUGGCUCGAGG	1	24.9165	0.829551	1	27.2658	0.780308	24.9165	27.2658	yes
aly-miR166g-5p	TRINITY_DN92353_c1_g2	381	398	391	-38.4	-25.1	0.653646	6	1-3,398-396;5-7,395-393;9-17,392-384;19-21,383-381	4-4,x-x[BULq];8-8,x-x[BULq];18-18,x-x[BULq]	(((-(((((((((-(((-(((&))).))).))))))))).)))	CCU-GAGCCAGAC-ACA-UCC&GGAAUGUUGUUUGGCUCGAGG	0	0	NA	5	136.329	0.88056	0	136.329	yes
aly-miR166g-5p	TRINITY_DN94375_c0_g1	676	696	687	-38.4	-25.8	0.671875	10	5-20,692-677	1-4,696-693[UP5];21-21,676-676[UP3]	.((((((((((((((((....&....)))))))))))))))).	GCUUGGGCCGAACAACAACAG&GGAAUGUUGUUUGGCUCGAGG	1	24.9165	0.853378	0	0	NA	24.9165	0	yes
aly-miR167a-5p_R+1	TRINITY_DN100998_c0_g1	2086	2107	2098	-39.9	-26.5	0.66416	8	4-13,2104-2095;15-22,2093-2086	1-3,2107-2105[UP5];14-14,2094-2094[SIL]	((((((((.((((((((((...&...)))))))))).))))))))	UUAGGUUAAGCUGGCAGUUGUG&UGAAGCUGCCAGCAUGAUCUAA	0	0	NA	1	27.2658	0.8508	0	27.2658	yes
aly-miR167d-3p_2ss9CT20GA	TRINITY_DN100350_c1_g3	1083	1105	1096	-36.1	-23.8	0.65928	8.5	1-10,1105-1096;12-15,1093-1090;16-21,1088-1083	11-11,1095-1094[AILt];x-x,1089-1089[BULt]	((((((.((((..((((((((((&))))))))))-.))))-))))))	GUUGAAGGCUGAAGAGAUGGCUU&AGGUCAUCUU-GCAGC-UUCAAU	0	0	NA	1	27.2658	0.999978	0	27.2658	yes
aly-miR167d-3p_2ss9CT20GA	TRINITY_DN101117_c1_g1	603	637	614	-36.1	-24.9	0.689751	31.5	2-9,636-629;10-19,614-605	1-1,637-637[UP5];x-x,628-615[BULt];20-21,604-603[UP3]	..((((((((((..............((((((((.&.))))))))--------------))))))))))..	GCUGGAGCUGCAGCUAUUCUUGUUGCAGAUGACCG&AGGUCAUCU--------------UGCAGCUUCAAU	0	0	NA	5	136.329	0.935098	0	136.329	yes
aly-miR167d-3p_2ss9CT20GA	TRINITY_DN101222_c0_g1	29	49	40	-36.1	-27.2	0.753463	8	4-18,46-32	1-3,49-47[UP5];19-21,31-29[UP3]	...(((((((((((((((...&...)))))))))))))))...	UCAGAAGCUGCAAGAUGAGAG&AGGUCAUCUUGCAGCUUCAAU	6	149.499	0.346385	7	190.861	0.338459	149.499	190.861	yes
aly-miR167d-3p_2ss9CT20GA	TRINITY_DN101564_c1_g5	547	566	557	-36.1	-23.9	0.66205	8	2-10,565-557;12-18,556-550	1-1,566-566[UP5];11-11,x-x[BULq];19-21,549-547[UP3]	...(((((((-(((((((((.&.))))))))).)))))))...	CAGGAAGCUG-AGGAUGACUG&AGGUCAUCUUGCAGCUUCAAU	0	0	NA	1	27.2658	0.999888	0	27.2658	yes
aly-miR167d-3p_2ss9CT20GA	TRINITY_DN102209_c1_g1	3913	3935	3924	-36.1	-24.38	0.675346	12	1-8,3935-3928;11-18,3923-3916	9-10,3927-3924[AILt];19-21,3915-3913[UP3]	...((((((((....((((((((&))))))))--..))))))))...	UCAGAAGCUGCCGAUGAUGAUCU&AGGUCAUC--UUGCAGCUUCAAU	1	24.9165	0.999765	0	0	NA	24.9165	0	yes
aly-miR167d-3p_2ss9CT20GA	TRINITY_DN102228_c0_g2	119	138	130	-36.1	-26.1	0.722992	7	1-2,138-137;4-5,135-134;7-19,133-121	3-3,136-136[SIL];6-6,x-x[BULq];20-21,120-119[UP3]	..(((((((((((((-((.((&)).)).)))))))))))))..	UAUGAAGCUGCAGGA-GAGCU&AGGUCAUCUUGCAGCUUCAAU	2	49.8331	0.564048	0	0	NA	49.8331	0	yes
aly-miR167d-3p_2ss9CT20GA	TRINITY_DN102671_c1_g1	284	304	295	-36.1	-25.5	0.706371	7	4-5,301-300;7-21,298-284	1-3,304-302[UP5];6-6,299-299[SIL]	(((((((((((((((.((...&...)).)))))))))))))))	AUUGAAGCUGCAAGAAGAAGA&AGGUCAUCUUGCAGCUUCAAU	2	49.8331	0.455222	3	81.7974	0.483913	49.8331	81.7974	yes
aly-miR167d-3p_2ss9CT20GA	TRINITY_DN102888_c0_g4	936	962	947	-36.1	-23.5	0.65097	16	1-6,962-957;7-19,950-938	x-x,956-951[BULt];20-21,937-936[UP3]	..(((((((((((((......((((((&))))))------)))))))))))))..	ACUGGAGUUGCAAGAGGUGGUUGACUU&AGGUCA------UCUUGCAGCUUCAAU	4	99.6661	0.953825	0	0	NA	99.6661	0	yes
aly-miR167d-3p_2ss9CT20GA	TRINITY_DN104134_c0_g1	603	623	614	-36.1	-23.7	0.65651	7.5	2-10,622-614;12-17,612-607	1-1,623-623[UP5];11-11,613-613[SIL];18-21,606-603[UP3]	....((((((.(((((((((.&.))))))))).))))))....	UUCUGAGCUGAAAGAUGACCA&AGGUCAUCUUGCAGCUUCAAU	0	0	NA	2	54.5316	0.998804	0	54.5316	yes
aly-miR167d-3p_2ss9CT20GA	TRINITY_DN105202_c1_g2	952	978	963	-36.1	-23.8	0.65928	18	1-6,978-973;7-9,966-964;11-18,962-955	x-x,972-967[BULt];10-10,963-963[SIL];19-21,954-952[UP3]	...((((((((.(((......((((((&))))))------))).))))))))...	UGGGAAGCUGCUGGAAUUUCUUGACCU&AGGUCA------UCUUGCAGCUUCAAU	3	74.7496	0.998434	2	54.5316	0.930819	74.7496	54.5316	yes
aly-miR167d-3p_2ss9CT20GA	TRINITY_DN107242_c0_g1	953	975	966	-36.1	-23.6	0.65374	11	1-10,975-966;11-15,963-959;17-18,957-956	x-x,965-964[BULt];16-16,958-958[SIL];19-21,955-953[UP3]	...((.(((((..((((((((((&))))))))))--))))).))...	AAGGAUGCUGUAAGAGAUGGCCU&AGGUCAUCUU--GCAGCUUCAAU	1	24.9165	0.999999	3	81.7974	0.999363	24.9165	81.7974	yes
aly-miR167d-3p_2ss9CT20GA	TRINITY_DN107647_c0_g4	171	193	182	-36.1	-23.88	0.661496	13	1-1,193-193;3-8,191-186;11-21,181-171	2-2,192-192[SIL];9-10,185-182[AILt]	(((((((((((....((((((.(&).))))))--..)))))))))))	AUUGGGGCUGCUGCUGGUGGCGU&AGGUCAUC--UUGCAGCUUCAAU	0	0	NA	2	54.5316	0.997524	0	54.5316	yes
aly-miR167d-3p_2ss9CT20GA	TRINITY_DN109582_c2_g1	1125	1144	1136	-36.1	-24.9	0.689751	6	2-9,1143-1136;11-12,1135-1134;14-19,1132-1127	1-1,1144-1144[UP5];10-10,x-x[BULq];13-13,1133-1133[SIL];20-21,1126-1125[UP3]	..((((((.((-((((((((.&.)))))))).)).))))))..	CGUGAAGCAGC-AGAUGACCG&AGGUCAUCUUGCAGCUUCAAU	0	0	NA	1	27.2658	0.989397	0	27.2658	yes
aly-miR167d-3p_2ss9CT20GA	TRINITY_DN111736_c1_g1	1094	1117	1108	-36.1	-25	0.692521	6.5	2-10,1116-1108;11-16,1106-1101;17-21,1098-1094	1-1,1117-1117[UP5];x-x,1107-1107[BULt];x-x,1100-1099[BULt]	(((((..((((((.(((((((((.&.)))))))))-))))))--)))))	AUUGGAAAGCUGCAAAGAUGACUA&AGGUCAUCUU-GCAGCU--UCAAU	0	0	NA	2	54.5316	0.925515	0	54.5316	yes
aly-miR167d-3p_2ss9CT20GA	TRINITY_DN111860_c1_g1	1021	1045	1032	-36.1	-23.6	0.65374	16	3-8,1043-1038;9-18,1033-1024	1-2,1045-1044[UP5];x-x,1037-1034[BULt];19-21,1023-1021[UP3]	...((((((((((....((((((..&..))))))----))))))))))...	CAAGAAGCUGCAGCAUUGGUGACGA&AGGUCAUC----UUGCAGCUUCAAU	0	0	NA	1	27.2658	0.999994	0	27.2658	yes
aly-miR167d-3p_2ss9CT20GA	TRINITY_DN112199_c0_g1	1287	1306	1297	-36.1	-25	0.692521	4	2-11,1305-1296;13-13,1295-1295;15-21,1293-1287	1-1,1306-1306[UP5];12-12,x-x[BULq];14-14,1294-1294[SIL]	(((((((.(-((((((((((.&.)))))))))).).)))))))	AUUGAAGGU-CAAGAUGACCC&AGGUCAUCUUGCAGCUUCAAU	2	49.8331	0.911956	0	0	NA	49.8331	0	yes
aly-miR167d-3p_2ss9CT20GA	TRINITY_DN112666_c0_g1	831	850	841	-36.1	-23.9	0.66205	8	2-10,849-841;12-18,840-834	1-1,850-850[UP5];11-11,x-x[BULq];19-21,833-831[UP3]	...(((((((-(((((((((.&.))))))))).)))))))...	ACCGAAGCUG-GAGAUGAUCA&AGGUCAUCUUGCAGCUUCAAU	1	24.9165	0.999982	0	0	NA	24.9165	0	yes
aly-miR167d-3p_2ss9CT20GA	TRINITY_DN113040_c2_g4	400	420	410	-36.1	-24.9	0.689751	6.5	1-3,420-418;5-10,415-410;12-21,409-400	4-4,417-416[AILt];11-11,x-x[BULq]	((((((((((-((((((..(((&)))-.)))))).))))))))))	GUUGAAGCUG-AAGAUGCUCCU&AGG-UCAUCUUGCAGCUUCAAU	1	24.9165	0.993793	0	0	NA	24.9165	0	yes
aly-miR167d-3p_2ss9CT20GA	TRINITY_DN113787_c0_g1	214	233	224	-36.1	-23.8	0.65928	7	1-8,233-226;10-10,224-224;12-18,223-217	9-9,225-225[SIL];11-11,x-x[BULq];19-21,216-214[UP3]	...(((((((-(.((((((((&)))))))).).)))))))...	AACGAAGCUG-AUGAUGACCU&AGGUCAUCUUGCAGCUUCAAU	1	24.9165	0.999994	0	0	NA	24.9165	0	yes
aly-miR167d-3p_2ss9CT20GA	TRINITY_DN114120_c1_g1	1690	1711	1702	-36.1	-25	0.692521	11	2-10,1710-1702;12-18,1699-1693	1-1,1711-1711[UP5];11-11,1701-1700[AILt];19-21,1692-1690[UP3]	...(((((((..(((((((((.&.)))))))))-.)))))))...	GCAGGGGCUGAGGAGGUGACCA&AGGUCAUCUU-GCAGCUUCAAU	2	49.8331	0.614552	2	54.5316	0.645934	49.8331	54.5316	yes
aly-miR167d-3p_2ss9CT20GA	TRINITY_DN114522_c0_g1	240	262	251	-36.1	-24	0.66482	9.5	3-8,260-255;9-13,252-248;15-21,246-240	1-2,262-261[UP5];x-x,254-253[BULt];14-14,247-247[SIL]	(((((((.(((((..((((((..&..))))))--))))).)))))))	GUUGAAGGUGCAGAUGAUGACGA&AGGUCAUC--UUGCAGCUUCAAU	1	24.9165	0.999973	0	0	NA	24.9165	0	yes
aly-miR167d-3p_2ss9CT20GA	TRINITY_DN114715_c2_g2	409	429	420	-36.1	-25.6	0.709141	6.5	1-4,429-426;6-21,424-409	5-5,425-425[SIL]	((((((((((((((((.((((&)))).))))))))))))))))	AUUGAAGUUGUGAGGUCGCCU&AGGUCAUCUUGCAGCUUCAAU	1	24.9165	0.944903	0	0	NA	24.9165	0	yes
aly-miR167d-3p_2ss9CT20GA	TRINITY_DN115217_c0_g1	453	474	464	-36.1	-25.4	0.703601	10	2-7,473-468;9-18,465-456	1-1,474-474[UP5];8-8,467-466[AILt];19-21,455-453[UP3]	...((((((((((..((((((.&.))))))-.))))))))))...	GACGAAGCUGCAACUGUGGCCA&AGGUCAU-CUUGCAGCUUCAAU	3	74.7496	0.831689	0	0	NA	74.7496	0	yes
aly-miR167d-3p_2ss9CT20GA	TRINITY_DN115549_c0_g1	991	1013	1004	-36.1	-24.4	0.6759	8.5	1-10,1013-1004;11-18,1001-994	x-x,1003-1002[BULt];19-21,993-991[UP3]	...((((((((..((((((((((&))))))))))--))))))))...	GGAGAAGUUGCCAAAGAUGAUCU&AGGUCAUCUU--GCAGCUUCAAU	2	49.8331	0.812889	5	136.329	0.986285	49.8331	136.329	yes
aly-miR167d-3p_2ss9CT20GA	TRINITY_DN115735_c0_g2	1060	1082	1071	-36.1	-24.4	0.6759	10.5	2-6,1081-1077;7-10,1074-1071;12-19,1069-1062	1-1,1082-1082[UP5];x-x,1076-1075[BULt];11-11,1070-1070[SIL];20-21,1061-1060[UP3]	..((((((((.((((..(((((.&.)))))--)))).))))))))..	UCUGGAGCUGGAAGAGUUGGCCC&AGGUCA--UCUUGCAGCUUCAAU	0	0	NA	1	27.2658	0.99896	0	27.2658	yes
aly-miR167d-3p_2ss9CT20GA	TRINITY_DN115822_c0_g1	648	666	659	-36.1	-23.6	0.65374	8	2-3,665-664;5-6,663-662;8-18,661-651	1-1,666-666[UP5];4-4,x-x[BULq];7-7,x-x[BULq];19-21,650-648[UP3]	...(((((((((((-((-((.&.)).)).)))))))))))...	GAGGAAGCUGCAAG-UG-CCG&AGGUCAUCUUGCAGCUUCAAU	0	0	NA	2	54.5316	0.954101	0	54.5316	yes
aly-miR167d-3p_2ss9CT20GA	TRINITY_DN116355_c1_g1	1775	1796	1786	-36.1	-24.8	0.686981	10	3-4,1794-1793;5-10,1791-1786;12-21,1784-1775	1-2,1796-1795[UP5];x-x,1792-1792[BULt];11-11,1785-1785[SIL]	((((((((((.((((((.((..&..))-)))))).))))))))))	GUUGGAGCUGGGAGGUGCACAG&AGGU-CAUCUUGCAGCUUCAAU	3	74.7496	0.666938	3	81.7974	0.94001	74.7496	81.7974	yes
aly-miR167d-3p_2ss9CT20GA	TRINITY_DN116360_c2_g2	1487	1509	1498	-36.1	-24.5	0.67867	10	1-9,1509-1501;11-20,1497-1488	10-10,1500-1498[AILt];21-21,1487-1487[UP3]	.((((((((((...(((((((((&)))))))))--.)))))))))).	UUUGAAGCUGUUGUAGGUGACUU&AGGUCAUCU--UGCAGCUUCAAU	1	24.9165	0.999555	0	0	NA	24.9165	0	yes
aly-miR167d-3p_2ss9CT20GA	TRINITY_DN116477_c1_g1	158	183	169	-36.1	-24.9	0.689751	15	2-9,182-175;10-21,169-158	1-1,183-183[UP5];x-x,174-170[BULt]	((((((((((((.....((((((((.&.))))))))-----))))))))))))	GUUGGAGCUGCAUAAGAAGGUGAUUC&AGGUCAUCU-----UGCAGCUUCAAU	1	24.9165	0.994858	0	0	NA	24.9165	0	yes
aly-miR167d-3p_2ss9CT20GA	TRINITY_DN117245_c1_g4	23	42	35	-36.1	-24.2	0.67036	7	1-4,42-39;7-16,38-29;17-21,27-23	5-6,x-x[BULq];x-x,28-28[BULt]	(((((.((((((((((--((((&))))..))))))))))-)))))	GUUGAUGGCUGCAAGA--GCCU&AGGUCAUCUUGCAGCU-UCAAU	0	0	NA	2	54.5316	0.991613	0	54.5316	yes
aly-miR167d-3p_2ss9CT20GA	TRINITY_DN118006_c0_g3	1224	1244	1235	-36.1	-24.2	0.67036	10	3-5,1242-1240;7-18,1238-1227	1-2,1244-1243[UP5];6-6,1239-1239[SIL];19-21,1226-1224[UP3]	...((((((((((((.(((..&..))).))))))))))))...	GACGAAGCUGCAGGAGGAUAU&AGGUCAUCUUGCAGCUUCAAU	2	49.8331	0.991763	0	0	NA	49.8331	0	yes
aly-miR167d-3p_2ss9CT20GA	TRINITY_DN118351_c1_g1	449	468	460	-36.1	-26.1	0.722992	7.5	1-2,468-467;4-6,465-463;8-19,462-451	3-3,466-466[SIL];7-7,x-x[BULq];20-21,450-449[UP3]	..((((((((((((-(((.((&)).))).))))))))))))..	GCUGAGGCUGCGAG-UGAGCU&AGGUCAUCUUGCAGCUUCAAU	2	49.8331	0.55513	0	0	NA	49.8331	0	yes
aly-miR167d-3p_2ss9CT20GA	TRINITY_DN118843_c0_g1	52	73	64	-36.1	-23.8	0.65928	7	2-10,72-64;12-16,63-59;17-21,56-52	1-1,73-73[UP5];11-11,x-x[BULq];x-x,58-57[BULt]	(((((..(((((-(((((((((.&.))))))))).)))))--)))))	AUUGAUAAGCUG-GAGGUGACCA&AGGUCAUCUUGCAGCU--UCAAU	0	0	NA	3	81.7974	0.998296	0	81.7974	yes
aly-miR167d-3p_2ss9CT20GA	TRINITY_DN120216_c0_g1	1358	1378	1369	-36.1	-25.4	0.703601	8	2-2,1377-1377;4-5,1375-1374;7-18,1372-1361	1-1,1378-1378[UP5];3-3,1376-1376[SIL];6-6,1373-1373[SIL];19-21,1360-1358[UP3]	...((((((((((((.((.(.&.).)).))))))))))))...	CAAGAAGCUGCAAGAAGAGCA&AGGUCAUCUUGCAGCUUCAAU	0	0	NA	1	27.2658	0.939514	0	27.2658	yes
aly-miR167d-3p_2ss9CT20GA	TRINITY_DN120331_c1_g1	743	763	755	-36.1	-24.4	0.6759	7.5	2-6,762-758;8-16,757-749;17-18,747-746	1-1,763-763[UP5];7-7,x-x[BULq];x-x,748-748[BULt];19-21,745-743[UP3]	...((.(((((((((-(((((.&.))))).)))))))))-))...	UAGGGCAGCUGCAAG-UGACCA&AGGUCAUCUUGCAGCU-UCAAU	1	24.9165	0.999683	0	0	NA	24.9165	0	yes
aly-miR167d-3p_2ss9CT20GA	TRINITY_DN120882_c0_g2	1407	1427	1418	-36.1	-23.8	0.65928	9.5	2-10,1426-1418;12-18,1416-1410	1-1,1427-1427[UP5];11-11,1417-1417[SIL];19-21,1409-1407[UP3]	...(((((((.(((((((((.&.))))))))).)))))))...	GAGGAAGUUGGGGGAUGAUCC&AGGUCAUCUUGCAGCUUCAAU	2	49.8331	0.998669	1	27.2658	0.999974	49.8331	27.2658	yes
aly-miR167d-3p_2ss9CT20GA	TRINITY_DN121529_c14_g1	564	584	575	-36.1	-25.1	0.695291	6.5	1-5,584-580;7-18,578-567	6-6,579-579[SIL];19-21,566-564[UP3]	...((((((((((((.(((((&))))).))))))))))))...	CAAGAAGUUGCAAGAAGAUCU&AGGUCAUCUUGCAGCUUCAAU	62	1544.82	0.570749	47	1281.49	0.601898	1544.82	1281.49	yes
aly-miR167d-3p_2ss9CT20GA	TRINITY_DN121571_c0_g1	2246	2273	2259	-36.1	-24.4	0.6759	15	2-5,2272-2269;6-17,2263-2252;18-21,2249-2246	1-1,2273-2273[UP5];x-x,2268-2264[BULt];x-x,2251-2250[BULt]	((((..((((((((((((.....((((.&.))))-----))))))))))))--))))	GUUGCAGAGCUGCAAGAUUUGAAGGCCA&AGGUC-----AUCUUGCAGCUU--CAAU	1	24.9165	0.999756	1	27.2658	0.999196	24.9165	27.2658	yes
aly-miR167d-3p_2ss9CT20GA	TRINITY_DN121789_c1_g1	307	326	317	-36.1	-24.8	0.686981	6.5	2-2,325-325;4-12,323-315;14-19,314-309	1-1,326-326[UP5];3-3,324-324[SIL];13-13,x-x[BULq];20-21,308-307[UP3]	..((((((-(((((((((.(.&.).))))))))).))))))..	GAUGAGGC-GCAAGAUGAGCA&AGGUCAUCUUGCAGCUUCAAU	0	0	NA	3	81.7974	0.951685	0	81.7974	yes
aly-miR167d-3p_2ss9CT20GA	TRINITY_DN121847_c0_g1	1246	1271	1257	-36.1	-25	0.692521	15.5	2-6,1270-1266;7-18,1260-1249	1-1,1271-1271[UP5];x-x,1265-1261[BULt];19-21,1248-1246[UP3]	...((((((((((((.....(((((.&.)))))-----))))))))))))...	ACCGAGGCUGUAAGAACGAUUGACCC&AGGUCA-----UCUUGCAGCUUCAAU	0	0	NA	2	54.5316	0.922525	0	54.5316	yes
aly-miR167d-3p_2ss9CT20GA	TRINITY_DN122303_c1_g2	164	182	173	-36.1	-23.9	0.66205	6	2-11,181-172;14-21,171-164	1-1,182-182[UP5];12-13,x-x[BULq]	((((((((--((((((((((.&.))))))))))..))))))))	AUUGAGGU--CAAGAUGGCCG&AGGUCAUCUUGCAGCUUCAAU	0	0	NA	2	54.5316	0.996029	0	54.5316	yes
aly-miR167d-3p_2ss9CT20GA	TRINITY_DN122439_c0_g1	37	57	48	-36.1	-29.4	0.814404	5	2-15,56-43;18-21,40-37	1-1,57-57[UP5];16-17,42-41[SIL]	((((..((((((((((((((.&.))))))))))))))..))))	AUUGUUGCUGUAGGAUGACCA&AGGUCAUCUUGCAGCUUCAAU	11	274.082	0.0589397	6	163.595	0.0248066	274.082	163.595	yes
aly-miR167d-3p_2ss9CT20GA	TRINITY_DN123468_c5_g1	54	79	65	-36.1	-24.9	0.689751	15	2-9,78-71;10-21,65-54	1-1,79-79[UP5];x-x,70-66[BULt]	((((((((((((.....((((((((.&.))))))))-----))))))))))))	GUUGGAGCUGCAGAAGAAGGUGAUUC&AGGUCAUCU-----UGCAGCUUCAAU	1	24.9165	0.993555	0	0	NA	24.9165	0	yes
aly-miR167d-3p_2ss9CT20GA	TRINITY_DN124356_c0_g1	1298	1321	1309	-36.1	-24.3	0.67313	12.5	1-4,1321-1318;5-10,1314-1309;12-18,1307-1301	x-x,1317-1315[BULt];11-11,1308-1308[SIL];19-21,1300-1298[UP3]	...(((((((.((((((...((((&))))---)))))).)))))))...	UUCGAGGCUGGAAGAUGGUAGCCU&AGGU---CAUCUUGCAGCUUCAAU	1	24.9165	0.999813	0	0	NA	24.9165	0	yes
aly-miR167d-3p_2ss9CT20GA	TRINITY_DN124572_c2_g1	3195	3214	3206	-36.1	-23.9	0.66205	9	2-5,3213-3210;9-19,3207-3197	1-1,3214-3214[UP5];6-8,3209-3208[AILq];20-21,3196-3195[UP3]	..(((((((((((..-((((.&.))))...)))))))))))..	ACUGAAGCUGCAAAA-GACCG&AGGUCAUCUUGCAGCUUCAAU	1	24.9165	0.999987	0	0	NA	24.9165	0	yes
aly-miR167d-3p_2ss9CT20GA	TRINITY_DN125170_c6_g2	414	437	427	-36.1	-23.7	0.65651	10	3-9,435-429;10-12,427-425;13-21,422-414	1-2,437-436[UP5];x-x,428-428[BULt];x-x,424-423[BULt]	(((((((((..(((.(((((((..&..)))))))-)))--)))))))))	GUUGGAGCUACGCAUAGAUGACAA&AGGUCAUCU-UGC--AGCUUCAAU	0	0	NA	1	27.2658	0.999985	0	27.2658	yes
aly-miR167d-3p_2ss9CT20GA	TRINITY_DN125265_c3_g1	473	493	484	-36.1	-24.4	0.6759	7	1-5,493-489;8-16,486-478;18-19,476-475	6-7,488-487[SIL];17-17,477-477[SIL];20-21,474-473[UP3]	..((.(((((((((..(((((&)))))..))))))))).))..	AAUGUAGCUGCAAGUGGACCU&AGGUCAUCUUGCAGCUUCAAU	3	74.7496	0.986334	1	27.2658	0.998926	74.7496	27.2658	yes
aly-miR167d-3p_2ss9CT20GA	TRINITY_DN89252_c0_g1	471	490	482	-36.1	-27.9	0.772853	7.5	2-5,489-486;7-19,485-473	1-1,490-490[UP5];6-6,x-x[BULq];20-21,472-471[UP3]	..(((((((((((((-((((.&.)))).)))))))))))))..	AAUGAGGCUGCAGGG-GACCC&AGGUCAUCUUGCAGCUUCAAU	0	0	NA	1	27.2658	0.34242	0	27.2658	yes
aly-miR167d-3p_2ss9CT20GA	TRINITY_DN89556_c0_g2	284	303	295	-36.1	-23.82	0.659834	9.5	1-6,303-298;11-21,294-284	7-10,297-295[AILq]	(((((((((((...-((((((&))))))....)))))))))))	AUUGAGGCUGUUCC-UGACCU&AGGUCAUCUUGCAGCUUCAAU	0	0	NA	1	27.2658	0.999951	0	27.2658	yes
aly-miR167d-3p_2ss9CT20GA	TRINITY_DN92217_c0_g1	243	262	254	-36.1	-23.8	0.65928	9	3-6,260-257;8-18,256-246	1-2,262-261[UP5];7-7,x-x[BULq];19-21,245-243[UP3]	...(((((((((((-((((..&..)))).)))))))))))...	AGAGAAGCUGCAAG-UGAUAU&AGGUCAUCUUGCAGCUUCAAU	2	49.8331	0.916535	1	27.2658	0.99997	49.8331	27.2658	yes
aly-miR167d-3p_2ss9CT20GA	TRINITY_DN94364_c0_g1	681	702	693	-36.1	-25.1	0.695291	8	2-11,701-692;12-19,690-683	1-1,702-702[UP5];x-x,691-691[BULt];20-21,682-681[UP3]	..((((((((.((((((((((.&.))))))))))-))))))))..	GAUGAGGUUGACAAGGUGAUCA&AGGUCAUCUUG-CAGCUUCAAU	1	24.9165	0.985246	0	0	NA	24.9165	0	yes
aly-miR167d-3p_2ss9CT20GA	TRINITY_DN95006_c4_g3	1000	1021	1012	-36.1	-31.5	0.872576	4.5	2-12,1020-1010;14-21,1007-1000	1-1,1021-1021[UP5];13-13,1009-1008[AILt]	((((((((..(((((((((((.&.)))))))))))-.))))))))	GUUGAAGCCGGCAAGAUGACCA&AGGUCAUCUUGC-AGCUUCAAU	1	24.9165	0.0725256	3	81.7974	0.0166069	24.9165	81.7974	yes
aly-miR167d-3p_2ss9CT20GA	TRINITY_DN95717_c1_g1	426	446	438	-36.1	-24.3	0.67313	5.5	1-4,446-443;6-12,442-436;13-21,434-426	5-5,x-x[BULq];x-x,435-435[BULt]	(((((((((.(((((((-((((&)))).)))))))-)))))))))	AUUGAGGCUGGUAAGAU-ACCU&AGGUCAUCUUGC-AGCUUCAAU	1	24.9165	0.999806	1	27.2658	0.999338	24.9165	27.2658	yes
aly-miR167d-3p_2ss9CT20GA	TRINITY_DN97229_c1_g5	326	346	337	-36.1	-26.7	0.739612	8	2-2,345-345;4-18,343-329	1-1,346-346[UP5];3-3,344-344[SIL];19-21,328-326[UP3]	...(((((((((((((((.(.&.).)))))))))))))))...	CAAGAAGCUGCAAGAUGGGUG&AGGUCAUCUUGCAGCUUCAAU	1	24.9165	0.676757	2	54.5316	0.222129	24.9165	54.5316	yes
aly-miR167d-3p_2ss9CT20GA	TRINITY_DN98222_c0_g2	6	33	24	-36.1	-26	0.720222	11	2-13,32-21;14-18,13-9	1-1,33-33[UP5];x-x,20-14[BULt];19-21,8-6[UP3]	...(((((.......((((((((((((.&.))))))))))))-------)))))...	ACAGAAGCGCAAGCAUGCAAGAUGACCC&AGGUCAUCUUGCA-------GCUUCAAU	0	0	NA	1	27.2658	0.780308	0	27.2658	yes
aly-miR167d-3p_2ss9CT20GA	TRINITY_DN98368_c2_g1	855	874	866	-36.1	-26.1	0.722992	7	1-2,874-873;4-5,871-870;7-19,869-857	3-3,872-872[SIL];6-6,x-x[BULq];20-21,856-855[UP3]	..(((((((((((((-((.((&)).)).)))))))))))))..	UAUGAAGCUGCAGGA-GAGCU&AGGUCAUCUUGCAGCUUCAAU	1	24.9165	0.809172	0	0	NA	24.9165	0	yes
aly-miR167d-3p_2ss9CT20GA	TRINITY_DN98708_c0_g2	264	286	275	-36.1	-25.7	0.711911	9	3-8,284-279;9-21,276-264	1-2,286-285[UP5];x-x,278-277[BULt]	(((((((((((((..((((((..&..))))))--)))))))))))))	AUUGAAGCUGCAAUCGGUGAUAU&AGGUCAUC--UUGCAGCUUCAAU	2	49.8331	0.737225	1	27.2658	0.880947	49.8331	27.2658	yes
aly-miR167d-3p_2ss9CT20GA	TRINITY_DN99707_c0_g3	10	36	21	-36.1	-23.5	0.65097	16	1-6,36-31;7-19,24-12	x-x,30-25[BULt];20-21,11-10[UP3]	..(((((((((((((......((((((&))))))------)))))))))))))..	ACUGGAGUUGCAAGAGGUGGUUGACUU&AGGUCA------UCUUGCAGCUUCAAU	2	49.8331	0.952383	2	54.5316	0.963694	49.8331	54.5316	yes
aly-miR393a-3p	TRINITY_DN100384_c5_g1	348	370	361	-32.2	-22.5	0.698758	7.5	1-14,370-357;15-18,354-351	x-x,356-355[BULt];19-21,350-348[UP3]	...((((..((((((((((((((&))))))))))))))--))))...	AGGCUAGUCGGAGGUAGCAUGAU&AUCAUGCUAUCUCU--UUGGAUU	5	124.583	0.831689	3	81.7974	0.82297	124.583	81.7974	yes
aly-miR393a-3p	TRINITY_DN100749_c0_g1	777	797	789	-32.2	-22.1	0.686335	6	1-4,797-794;6-14,793-785;15-19,783-779	5-5,x-x[BULq];x-x,784-784[BULt];20-21,778-777[UP3]	..(((((.(((((((((-((((&)))).)))))))))-)))))..	UUUCCGGUAGAGAUAGC-UGAU&AUCAUGCUAUCUCU-UUGGAUU	0	0	NA	1	27.2658	0.972103	0	27.2658	yes
aly-miR393a-3p	TRINITY_DN103276_c0_g1	1459	1479	1470	-32.2	-21	0.652174	10	2-3,1478-1477;5-16,1475-1464;18-20,1462-1460	1-1,1479-1479[UP5];4-4,1476-1476[SIL];17-17,1463-1463[SIL];21-21,1459-1459[UP3]	.(((.((((((((((((.((.&.)).)))))))))))).))).	UGUCGGGGGAGGUGGCGGGAG&AUCAUGCUAUCUCUUUGGAUU	3	74.7496	0.996621	0	0	NA	74.7496	0	yes
aly-miR393a-3p	TRINITY_DN104869_c3_g1	510	531	521	-32.2	-21.9	0.680124	7.5	1-3,531-529;5-21,526-510	4-4,528-527[AILt]	(((((((((((((((((..(((&)))-.)))))))))))))))))	AGUUUAGGGAGAUAGCGGGGAU&AUC-AUGCUAUCUCUUUGGAUU	3	74.7496	0.935019	5	136.329	0.929784	74.7496	136.329	yes
aly-miR393a-3p	TRINITY_DN105133_c0_g1	1114	1136	1127	-32.2	-25.9	0.804348	5	1-10,1136-1127;11-16,1125-1120;17-21,1118-1114	x-x,1126-1126[BULt];x-x,1119-1119[BULt]	(((((.((((((.((((((((((&))))))))))-))))))-)))))	AGUCCAAGAGAGUAUGGCAUGAU&AUCAUGCUAU-CUCUUU-GGAUU	1	24.9165	0.139791	0	0	NA	24.9165	0	yes
aly-miR393a-3p	TRINITY_DN106918_c0_g1	863	883	874	-32.2	-21.9	0.680124	7.5	1-4,883-880;6-8,879-877;9-19,875-865	5-5,x-x[BULq];x-x,876-876[BULt];20-21,864-863[UP3]	..(((((((((((.(((-((((&)))).)))-)))))))))))..	GUUCCAAGGAGAUAAGC-UGGU&AUCAUGCU-AUCUCUUUGGAUU	2	49.8331	0.938849	0	0	NA	49.8331	0	yes
aly-miR393a-3p	TRINITY_DN108781_c0_g1	609	630	621	-32.2	-21.2	0.658385	11	3-14,628-617;15-18,615-612	1-2,630-629[UP5];x-x,616-616[BULt];19-21,611-609[UP3]	...((((.((((((((((((..&..))))))))))))-))))...	GUCCCAGCGGGGGUGGCAUGUC&AUCAUGCUAUCUCU-UUGGAUU	2	49.8331	0.852568	0	0	NA	49.8331	0	yes
aly-miR393a-3p	TRINITY_DN110293_c0_g3	645	664	656	-32.2	-21.2	0.658385	9.5	1-3,664-662;5-18,661-648	4-4,x-x[BULq];19-21,647-645[UP3]	...((((((((((((((-(((&))).))))))))))))))...	CUACCAAGGGGGUGGUA-GAU&AUCAUGCUAUCUCUUUGGAUU	1	24.9165	0.999871	0	0	NA	24.9165	0	yes
aly-miR393a-3p	TRINITY_DN112801_c0_g4	946	966	957	-32.2	-21.6	0.670807	5.5	2-5,965-962;7-12,960-955;14-21,953-946	1-1,966-966[UP5];6-6,961-961[SIL];13-13,954-954[SIL]	((((((((.((((((.((((.&.)))).)))))).))))))))	AGUCCAAACAGAUGGGAUGAG&AUCAUGCUAUCUCUUUGGAUU	0	0	NA	2	54.5316	0.96866	0	54.5316	yes
aly-miR393a-3p	TRINITY_DN112881_c2_g3	99	119	110	-32.2	-21.6	0.670807	9.5	2-5,118-115;7-8,113-112;10-21,110-99	1-1,119-119[UP5];6-6,114-114[SIL];9-9,111-111[SIL]	((((((((((((.((.((((.&.)))).)).))))))))))))	AGUCCGGAGAGGCAGGGUGGG&AUCAUGCUAUCUCUUUGGAUU	0	0	NA	1	27.2658	0.997263	0	27.2658	yes
aly-miR393a-3p	TRINITY_DN114058_c0_g1	198	218	209	-32.2	-21	0.652174	9.5	3-16,216-203	1-2,218-217[UP5];17-21,202-198[UP3]	.....((((((((((((((..&..)))))))))))))).....	GCAGGGAAGAGAUGGCAUGUG&AUCAUGCUAUCUCUUUGGAUU	1	24.9165	0.999977	0	0	NA	24.9165	0	yes
aly-miR393a-3p	TRINITY_DN114321_c1_g2	1187	1209	1198	-32.2	-21.2	0.658385	11.5	1-5,1209-1205;6-8,1202-1200;10-19,1198-1189	x-x,1204-1203[BULt];9-9,1199-1199[SIL];20-21,1188-1187[UP3]	..((((((((((.(((..(((((&)))))--))).))))))))))..	UCUCCGAAGGGAAGGCCAGUGAU&AUCAU--GCUAUCUCUUUGGAUU	0	0	NA	1	27.2658	0.999578	0	27.2658	yes
aly-miR393a-3p	TRINITY_DN115144_c0_g2	1060	1081	1071	-32.2	-23.7	0.736025	6	1-3,1081-1079;4-14,1077-1067;16-19,1065-1062	x-x,1078-1078[BULt];15-15,1066-1066[SIL];20-21,1061-1060[UP3]	..((((.(((((((((((.(((&)))-))))))))))).))))..	GUUCCACAGAGAUGGCAUAGAU&AUC-AUGCUAUCUCUUUGGAUU	2	49.8331	0.444136	0	0	NA	49.8331	0	yes
aly-miR393a-3p	TRINITY_DN116502_c3_g2	25	46	36	-32.2	-21.8	0.677019	9	2-9,45-38;11-17,35-29;19-21,27-25	1-1,46-46[UP5];10-10,37-36[AILt];18-18,28-28[SIL]	(((.(((((((..((((((((.&.))))))))-.))))))).)))	GAUGCAAGGAGCUUGGCGUGAA&AUCAUGCUA-UCUCUUUGGAUU	2	49.8331	0.677025	1	27.2658	0.991262	49.8331	27.2658	yes
aly-miR393a-3p	TRINITY_DN117312_c1_g1	583	609	597	-32.2	-22.2	0.689441	10.5	1-8,609-602;9-16,598-591;17-21,587-583	x-x,601-599[BULt];x-x,590-588[BULt]	(((((...((((((((...((((((((&))))))))---))))))))---)))))	AAUCCGACGAAGAGAUUCAAGCAUGGU&AUCAUGCU---AUCUCUUU---GGAUU	16	398.664	0.883099	12	327.189	0.875767	398.664	327.189	yes
aly-miR393a-3p	TRINITY_DN117446_c0_g1	246	266	257	-32.2	-23.4	0.726708	11	5-18,262-249	1-4,266-263[UP5];19-21,248-246[UP3]	...((((((((((((((....&....))))))))))))))...	UACCCAAAGAGAUGGCACCAC&AUCAUGCUAUCUCUUUGGAUU	2	49.8331	0.527268	0	0	NA	49.8331	0	yes
aly-miR393a-3p	TRINITY_DN118501_c0_g3	438	458	449	-32.2	-21	0.652174	9.5	1-14,458-445;16-18,443-441	15-15,444-444[SIL];19-21,440-438[UP3]	...(((.((((((((((((((&)))))))))))))).)))...	GGCUCGUGGGGGUGGCAUGGU&AUCAUGCUAUCUCUUUGGAUU	0	0	NA	1	27.2658	0.999888	0	27.2658	yes
aly-miR393a-3p	TRINITY_DN118936_c0_g1	1904	1923	1915	-32.2	-22.1	0.686335	6.5	1-4,1923-1920;6-17,1919-1908;19-20,1906-1905	5-5,x-x[BULq];18-18,1907-1907[SIL];21-21,1904-1904[UP3]	.((.((((((((((((-((((&)))).)))))))))))).)).	CAUGCAGAGAGGUAGC-UGGU&AUCAUGCUAUCUCUUUGGAUU	0	0	NA	4	109.063	0.897956	0	109.063	yes
aly-miR393a-3p	TRINITY_DN119152_c2_g2	538	558	549	-32.2	-21.9	0.680124	13	6-18,553-541	1-5,558-554[UP5];19-21,540-538[UP3]	...(((((((((((((.....&.....)))))))))))))...	CUGCCAAAGAGGUAGCUAAGU&AUCAUGCUAUCUCUUUGGAUU	6	149.499	0.947995	5	136.329	0.943449	149.499	136.329	yes
aly-miR393a-3p	TRINITY_DN119178_c0_g2	816	836	827	-32.2	-21.8	0.677019	9	4-17,833-820;19-21,818-816	1-3,836-834[UP5];18-18,819-819[SIL]	(((.((((((((((((((...&...)))))))))))))).)))	AAUGCAAAGGGGUGGCAUUCA&AUCAUGCUAUCUCUUUGGAUU	0	0	NA	1	27.2658	0.992563	0	27.2658	yes
aly-miR393a-3p	TRINITY_DN120718_c0_g1	685	705	696	-32.2	-21.9	0.680124	12.5	7-21,699-685	1-6,705-700[UP5]	(((((((((((((((......&......)))))))))))))))	AAUCCAAGGAGAUGGAGAAUC&AUCAUGCUAUCUCUUUGGAUU	0	0	NA	1	27.2658	0.983875	0	27.2658	yes
aly-miR393a-3p	TRINITY_DN121159_c2_g1	168	188	179	-32.2	-21.1	0.65528	6.5	2-4,187-185;6-12,183-177;14-21,175-168	1-1,188-188[UP5];5-5,184-184[SIL];13-13,176-176[SIL]	((((((((.(((((((.(((.&.))).))))))).))))))))	GAUCCAAAAAGGUGGCCUGAG&AUCAUGCUAUCUCUUUGGAUU	18	448.498	0.99483	33	899.771	0.993998	448.498	899.771	yes
aly-miR393a-3p	TRINITY_DN121848_c1_g2	359	378	370	-32.2	-21	0.652174	6.5	2-5,377-374;8-20,372-360	1-1,378-378[UP5];6-7,373-373[AILq];21-21,359-359[UP3]	.(((((((((((((.-((((.&.))))..))))))))))))).	UAUCCAAGGAGAUAA-AUGAG&AUCAUGCUAUCUCUUUGGAUU	1	24.9165	0.999976	0	0	NA	24.9165	0	yes
aly-miR393a-3p	TRINITY_DN122105_c2_g1	181	204	195	-32.2	-21.9	0.680124	9	1-13,204-192;14-18,188-184	x-x,191-189[BULt];19-21,183-181[UP3]	...(((((...(((((((((((((&)))))))))))))---)))))...	AUCCCAAAUGUGAGAUGGUAUGGU&AUCAUGCUAUCUC---UUUGGAUU	1	24.9165	0.994022	0	0	NA	24.9165	0	yes
aly-miR393a-3p	TRINITY_DN123013_c2_g2	387	407	398	-32.2	-22.3	0.692547	7.5	1-3,407-405;5-16,403-392;18-21,390-387	4-4,404-404[SIL];17-17,391-391[SIL]	((((.((((((((((((.(((&))).)))))))))))).))))	GGUUGGGAGAGAUGGCAGGGU&AUCAUGCUAUCUCUUUGGAUU	2	49.8331	0.867998	0	0	NA	49.8331	0	yes
aly-miR393a-3p	TRINITY_DN123334_c6_g4	647	667	658	-32.2	-21.9	0.680124	8.5	2-4,666-664;7-21,661-647	1-1,667-667[UP5];5-6,663-662[SIL]	(((((((((((((((..(((.&.)))..)))))))))))))))	GAUUCGAAGAGAUGGAUUGGG&AUCAUGCUAUCUCUUUGGAUU	2	49.8331	0.661777	0	0	NA	49.8331	0	yes
aly-miR393a-3p	TRINITY_DN123995_c6_g4	354	374	365	-32.2	-21.5	0.667702	12	5-21,370-354	1-4,374-371[UP5]	(((((((((((((((((....&....)))))))))))))))))	AGUUCGAGGGGGUGGCACGUU&AUCAUGCUAUCUCUUUGGAUU	1	24.9165	0.999301	0	0	NA	24.9165	0	yes
aly-miR393a-3p	TRINITY_DN124503_c2_g1	554	574	565	-32.2	-21.3	0.661491	7.5	3-8,572-567;10-13,565-562;15-21,560-554	1-2,574-573[UP5];9-9,566-566[SIL];14-14,561-561[SIL]	(((((((.((((.((((((..&..)))))).)))).)))))))	AGUCCAAUGAGACAGUAUGGA&AUCAUGCUAUCUCUUUGGAUU	1	24.9165	0.999756	1	27.2658	0.999196	24.9165	27.2658	yes
aly-miR393a-3p	TRINITY_DN125148_c7_g1	499	518	509	-32.2	-22.1	0.686335	4.5	2-12,517-507;14-21,506-499	1-1,518-518[UP5];13-13,x-x[BULq]	((((((((-(((((((((((.&.))))))))))).))))))))	GAUUCAGA-AGAUGGCAUGAC&AUCAUGCUAUCUCUUUGGAUU	1	24.9165	0.983482	0	0	NA	24.9165	0	yes
aly-miR393a-3p	TRINITY_DN91665_c0_g1	393	414	404	-32.2	-24.7	0.767081	9	2-7,413-408;9-20,405-394	1-1,414-414[UP5];8-8,407-406[AILt];21-21,393-393[UP3]	.((((((((((((..((((((.&.))))))-.)))))))))))).	UGUCCGAAGAGGUCUGCGUGAC&AUCAUGC-UAUCUCUUUGGAUU	1	24.9165	0.363481	1	27.2658	0.32087	24.9165	27.2658	yes
aly-miR393a-3p	TRINITY_DN92355_c1_g1	603	623	614	-32.2	-22.4	0.695652	11.5	3-8,621-616;10-19,614-605	1-2,623-622[UP5];9-9,615-615[SIL];20-21,604-603[UP3]	..((((((((((.((((((..&..)))))).))))))))))..	UUUCCGGGGAGGAGGCGUGGA&AUCAUGCUAUCUCUUUGGAUU	2	49.8331	0.853933	0	0	NA	49.8331	0	yes
aly-miR393a-3p	TRINITY_DN93164_c1_g1	1624	1645	1636	-32.2	-21.1	0.65528	8	3-12,1643-1634;13-15,1632-1630;17-21,1628-1624	1-2,1645-1644[UP5];x-x,1633-1633[BULt];16-16,1629-1629[SIL]	(((((.(((.((((((((((..&..))))))))))-))).)))))	GAUCUCAAGCAGGUAGCAUGGA&AUCAUGCUAUCU-CUUUGGAUU	0	0	NA	2	54.5316	0.994115	0	54.5316	yes
aly-miR393a-3p	TRINITY_DN93935_c0_g1	413	434	425	-32.2	-21	0.652174	10	3-11,432-424;13-13,422-422;14-21,420-413	1-2,434-433[UP5];12-12,423-423[SIL];x-x,421-421[BULt]	((((((((.(.(((((((((..&..))))))))).)-))))))))	GAUCCGAACGUGGUGGCGUGUU&AUCAUGCUAUCUC-UUUGGAUU	5	124.583	0.882936	3	81.7974	0.903297	124.583	81.7974	yes
aly-miR393a-3p	TRINITY_DN94329_c0_g1	557	582	569	-32.2	-21.1	0.65528	11.5	1-6,582-577;7-13,572-566;14-19,564-559	x-x,576-573[BULt];x-x,565-565[BULt];20-21,558-557[UP3]	..((((((.(((((((....((((((&))))))----)))))))-))))))..	GUUCCAGAUGAGAUAGUUGUCAUGAU&AUCAUG----CUAUCUC-UUUGGAUU	1	24.9165	0.999948	1	27.2658	0.999786	24.9165	27.2658	yes
aly-miR393a-3p	TRINITY_DN94364_c0_g1	664	683	675	-32.2	-21.7	0.673913	7	1-7,683-677;9-11,676-674;13-19,672-666	8-8,x-x[BULq];12-12,673-673[SIL];20-21,665-664[UP3]	..(((((((.(((-(((((((&))))))).))).)))))))..	CUUCCAAAGUGGU-GCAUGAU&AUCAUGCUAUCUCUUUGGAUU	1	24.9165	0.998068	0	0	NA	24.9165	0	yes
aly-miR393a-3p	TRINITY_DN98216_c1_g3	1028	1049	1040	-32.2	-21.6	0.670807	10	2-7,1048-1043;9-11,1041-1039;12-20,1037-1029	1-1,1049-1049[UP5];8-8,1042-1042[SIL];x-x,1038-1038[BULt];21-21,1028-1028[UP3]	.(((((((((.(((.((((((.&.)))))).)))-))))))))).	UGUCCAGAGGUGGUUGCGUGAG&AUCAUGCUAUC-UCUUUGGAUU	2	49.8331	0.972239	0	0	NA	49.8331	0	yes
aly-miR393a-3p	TRINITY_DN98513_c0_g1	976	996	987	-32.2	-21	0.652174	9.5	3-16,994-981	1-2,996-995[UP5];17-21,980-976[UP3]	.....((((((((((((((..&..)))))))))))))).....	ACAGGGAAGAGAUGGCAUGUG&AUCAUGCUAUCUCUUUGGAUU	0	0	NA	2	54.5316	0.997158	0	54.5316	yes
aly-miR393a-5p	TRINITY_DN110658_c1_g1	1002	1024	1014	-40.8	-27.4	0.671569	9.5	1-4,1024-1021;6-19,1018-1005	5-5,1020-1019[AILt];20-22,1004-1002[UP3]	...((((((((((((((..((((&))))-.))))))))))))))...	UACUCAGUGCGGUCCUUGCUGGA&UCCA-AAGGGAUCGCAUUGAUCC	0	0	NA	1	27.2658	0.458092	0	27.2658	yes
aly-miR393a-5p	TRINITY_DN111441_c0_g1	1365	1387	1378	-40.8	-36.8	0.901961	2	1-18,1387-1370;20-22,1367-1365	19-19,1369-1368[AILt]	(((..((((((((((((((((((&))))))))))))))))))-.)))	GGAGACAAUGCGAUCCCUUUGGA&UCCAAAGGGAUCGCAUUG-AUCC	0	0	NA	50	1363.29	0.000601075	0	1363.29	yes
aly-miR393a-5p	TRINITY_DN112001_c0_g2	41	70	60	-40.8	-27	0.661765	10.5	1-7,70-64;8-10,62-60;11-13,58-56;14-22,49-41	x-x,63-63[BULt];x-x,59-59[BULt];x-x,55-50[BULt]	(((((((((......(((.(((.(((((((&)))))))-)))-)))------)))))))))	GGAUCAGUGGUGAGUCGAGUCCACUUUGGA&UCCAAAG-GGA-UCG------CAUUGAUCC	1	24.9165	0.651481	1	27.2658	0.594594	24.9165	27.2658	yes
aly-miR393a-5p	TRINITY_DN113132_c0_g1	2686	2707	2698	-40.8	-29.8	0.730392	5.5	1-4,2707-2704;6-20,2702-2688	5-5,2703-2703[SIL];21-22,2687-2686[UP3]	..(((((((((((((((.((((&)))).)))))))))))))))..	GAGUCAAUGCGAUCCUUGUGGA&UCCAAAGGGAUCGCAUUGAUCC	0	0	NA	189	5153.23	0.00419995	0	5153.23	yes
aly-miR393a-5p	TRINITY_DN114227_c0_g3	354	375	366	-40.8	-27.1	0.664216	5.5	1-11,375-365;13-15,363-361;18-22,358-354	12-12,364-364[SIL];16-17,360-359[SIL]	(((((..(((.(((((((((((&))))))))))).)))..)))))	GGAUUUUUGCCAUCCUUUUGGA&UCCAAAGGGAUCGCAUUGAUCC	0	0	NA	1	27.2658	0.553418	0	27.2658	yes
aly-miR393a-5p	TRINITY_DN114389_c0_g1	1793	1814	1805	-40.8	-28.4	0.696078	5.5	3-17,1812-1798;19-21,1796-1794	1-2,1814-1813[UP5];18-18,1797-1797[SIL];22-22,1793-1793[UP3]	.(((.(((((((((((((((..&..))))))))))))))).))).	UGAUGAAUGUGAUCCCUUUGUA&UCCAAAGGGAUCGCAUUGAUCC	5	124.583	0.00574437	0	0	NA	124.583	0	yes
aly-miR393a-5p	TRINITY_DN123358_c3_g3	560	581	572	-40.8	-26.6	0.651961	5	1-12,581-570;14-20,568-562	13-13,569-569[SIL];21-22,561-560[UP3]	..(((((((.((((((((((((&)))))))))))).)))))))..	GAAUCAAUGAGGUCUCUUUGGA&UCCAAAGGGAUCGCAUUGAUCC	12	298.998	0.0216537	0	0	NA	298.998	0	yes
aly-miR393a-5p	TRINITY_DN123650_c1_g2	29	51	42	-40.8	-36.8	0.901961	2	1-18,51-34;20-22,31-29	19-19,33-32[AILt]	(((..((((((((((((((((((&))))))))))))))))))-.)))	GGAGACAAUGCGAUCCCUUUGGA&UCCAAAGGGAUCGCAUUG-AUCC	0	0	NA	76	2072.2	0.00120179	0	2072.2	yes
aly-miR393a-5p	TRINITY_DN123650_c1_g4	186	208	199	-40.8	-36.8	0.901961	2	1-18,208-191;20-22,188-186	19-19,190-189[AILt]	(((..((((((((((((((((((&))))))))))))))))))-.)))	GGAGACAAUGCGAUCCCUUUGGA&UCCAAAGGGAUCGCAUUG-AUCC	0	0	NA	37	1008.83	0.00180214	0	1008.83	yes
aly-miR393a-5p	TRINITY_DN92591_c0_g2	754	779	766	-40.8	-27.78	0.680882	12.5	1-5,779-775;7-9,769-767;11-22,765-754	6-6,774-770[AILt];10-10,766-766[SIL]	((((((((((((.(((.....(((((&)))))----.))).))))))))))))	GGAUCAAUGUGAACCCACCGCUUGGA&UCCAA----AGGGAUCGCAUUGAUCC	2	49.8331	0.199679	0	0	NA	49.8331	0	yes
aly-miR395c-3p_1ss17GA	TRINITY_DN101740_c0_g3	932	953	944	-37.1	-25.2	0.679245	7.5	1-11,953-943;13-15,941-939;16-21,937-932	12-12,942-942[SIL];x-x,938-938[BULt]	((((((.(((.(((((((((((&))))))))))).)))-))))))	GAGUUCACCCAGAACGCUUUGG&CUGAAGUGUUUGGGG-GAACUU	0	0	NA	3	81.7974	0.043274	0	81.7974	yes
aly-miR395c-3p_1ss17GA	TRINITY_DN107577_c0_g1	1071	1091	1082	-37.1	-24.9	0.671159	8	2-6,1090-1086;8-9,1084-1083;11-20,1081-1072	1-1,1091-1091[UP5];7-7,1085-1085[SIL];10-10,1082-1082[SIL];21-21,1071-1071[UP3]	.((((((((((.((.(((((.&.))))).)).)))))))))).	CGGUUCCUCCAUGCUCUUCAA&CUGAAGUGUUUGGGGGAACUU	22	548.164	0.0455916	0	0	NA	548.164	0	yes
aly-miR395c-3p_1ss17GA	TRINITY_DN108297_c1_g2	114	135	125	-37.1	-26.8	0.722372	8.5	1-6,135-130;7-7,128-128;9-19,126-116	x-x,129-129[BULt];8-8,127-127[SIL];20-21,115-114[UP3]	..(((((((((((.(.((((((&))))))-).)))))))))))..	CUGUUCUCCCGAAGGUCUUCAG&CUGAAG-UGUUUGGGGGAACUU	1	24.9165	0.452461	0	0	NA	24.9165	0	yes
aly-miR395c-3p_1ss17GA	TRINITY_DN109342_c2_g6	459	479	470	-37.1	-29.1	0.784367	4	2-6,478-474;8-21,472-459	1-1,479-479[UP5];7-7,473-473[SIL]	((((((((((((((.(((((.&.))))).))))))))))))))	GAGUUCCUCCAAACUCUUCAU&CUGAAGUGUUUGGGGGAACUU	0	0	NA	2	54.5316	0.0248066	0	54.5316	yes
aly-miR395c-3p_1ss17GA	TRINITY_DN110025_c1_g1	150	170	161	-37.1	-25.2	0.679245	7.5	1-17,170-154	18-21,153-150[UP3]	....(((((((((((((((((&)))))))))))))))))....	CUCCUCCUCCAAAUAUUUCGG&CUGAAGUGUUUGGGGGAACUU	4	99.6661	0.678245	0	0	NA	99.6661	0	yes
aly-miR395c-3p_1ss17GA	TRINITY_DN119481_c0_g4	255	281	266	-37.1	-28.2	0.760108	15	1-7,281-275;8-19,268-257	x-x,274-269[BULt];20-21,256-255[UP3]	..((((((((((((......(((((((&)))))))------))))))))))))..	UCGUUCCCCCAAAUGAUACAACUUCAG&CUGAAGU------GUUUGGGGGAACUU	5	124.583	0.132158	0	0	NA	124.583	0	yes
aly-miR395c-3p_1ss17GA	TRINITY_DN120907_c1_g1	3442	3460	3452	-37.1	-25.1	0.67655	10.5	1-2,3460-3459;4-9,3457-3452;12-20,3451-3443	3-3,3458-3458[SIL];10-11,x-x[BULq];21-21,3442-3442[UP3]	.(((((((((--((((((.((&)).))))))..))))))))).	CGGUUCCCCU--GCACUUGGG&CUGAAGUGUUUGGGGGAACUU	1	24.9165	0.913441	0	0	NA	24.9165	0	yes
aly-miR395c-3p_1ss17GA	TRINITY_DN90149_c0_g1	208	231	221	-37.1	-24.3	0.654987	8.5	1-9,231-223;11-12,220-219;13-16,217-214;17-21,212-208	10-10,222-221[AILt];x-x,218-218[BULt];x-x,213-213[BULt]	(((((.((((.((..(((((((((&)))))))))-.))-))))-)))))	AGGUUACCCCACACUAUACUUCAG&CUGAAGUGU-UUG-GGGG-AACUU	0	0	NA	1	27.2658	0.989397	0	27.2658	yes
aly-miR395c-3p_1ss17GA	TRINITY_DN90149_c0_g2	569	592	582	-37.1	-24.3	0.654987	8.5	1-9,592-584;11-12,581-580;13-16,578-575;17-21,573-569	10-10,583-582[AILt];x-x,579-579[BULt];x-x,574-574[BULt]	(((((.((((.((..(((((((((&)))))))))-.))-))))-)))))	AGGUUACCCCACACUAUACUUCAG&CUGAAGUGU-UUG-GGGG-AACUU	0	0	NA	1	27.2658	0.98869	0	27.2658	yes
aly-miR858-5p_L-1R+1	TRINITY_DN101750_c0_g1	185	206	196	-36.1	-29.1	0.806094	5	1-9,206-198;10-21,196-185	x-x,197-197[BULt]	((((((((((((.(((((((((&)))))))))-))))))))))))	CGAGGUUGAACGUGAUAACGAA&UUCGUUGUC-UGUUCGACCUUG	1	24.9165	0.171572	0	0	NA	24.9165	0	yes
aly-miR858-5p_L-1R+1	TRINITY_DN105860_c2_g2	349	373	360	-36.1	-23.7	0.65651	12	1-9,373-365;10-10,360-360;12-20,358-350	x-x,364-361[BULt];11-11,359-359[SIL];21-21,349-349[UP3]	.(((((((((.(....(((((((((&)))))))))----).))))))))).	GAAGGUCGAAGACUUUGAUAACGAA&UUCGUUGUC----UGUUCGACCUUG	1	24.9165	0.998816	0	0	NA	24.9165	0	yes
aly-miR858-5p_L-1R+1	TRINITY_DN106803_c0_g1	167	187	178	-36.1	-25.6	0.709141	12	7-21,181-167	1-6,187-182[UP5]	(((((((((((((((......&......)))))))))))))))	CAAGGUCGAACAGAUGUGGUC&UUCGUUGUCUGUUCGACCUUG	0	0	NA	3	81.7974	0.544799	0	81.7974	yes
aly-miR858-5p_L-1R+1	TRINITY_DN107787_c2_g2	282	301	293	-36.1	-24.5	0.67867	5	1-6,301-296;8-21,295-282	7-7,x-x[BULq]	((((((((((((((-((((((&)))))).))))))))))))))	UAAGGUUGGACAGA-AACGGG&UUCGUUGUCUGUUCGACCUUG	0	0	NA	1	27.2658	0.961487	0	27.2658	yes
aly-miR858-5p_L-1R+1	TRINITY_DN109367_c0_g3	461	481	472	-36.1	-28.6	0.792244	9	3-10,479-472;13-21,469-461	1-2,481-480[UP5];11-12,471-470[SIL]	(((((((((..((((((((..&..))))))))..)))))))))	CAAGGUCGAUAAGGCAGCGUU&UUCGUUGUCUGUUCGACCUUG	0	0	NA	3	81.7974	0.128664	0	81.7974	yes
aly-miR858-5p_L-1R+1	TRINITY_DN109819_c1_g5	854	875	866	-36.1	-25.2	0.698061	8.5	4-11,872-865;12-21,863-854	1-3,875-873[UP5];x-x,864-864[BULt]	((((((((((.((((((((...&...))))))))-))))))))))	UAGGGUUGAACCAGACAACAUU&UUCGUUGUCUG-UUCGACCUUG	1	24.9165	0.895514	0	0	NA	24.9165	0	yes
aly-miR858-5p_L-1R+1	TRINITY_DN117363_c0_g1	377	398	388	-36.1	-23.6	0.65374	9	1-6,398-393;8-8,391-391;9-21,389-377	7-7,392-392[SIL];x-x,390-390[BULt]	(((((((((((((.(.((((((&)))))).)-)))))))))))))	CGGGGUCGAGUGGUAGGACGAA&UUCGUUGU-CUGUUCGACCUUG	1	24.9165	0.999301	0	0	NA	24.9165	0	yes
aly-miR858-5p_L-1R+1	TRINITY_DN118689_c0_g1	7	28	19	-36.1	-25.4	0.703601	9.5	1-10,28-19;13-20,15-8	11-12,18-16[AILt];21-21,7-7[UP3]	.((((((((...((((((((((&))))))))))-..)))))))).	GAAGGUCGGUCAAGGCAACGGA&UUCGUUGUCU-GUUCGACCUUG	2	49.8331	0.606026	0	0	NA	49.8331	0	yes
aly-miR858-5p_L-1R+1	TRINITY_DN119360_c2_g2	1294	1313	1304	-36.1	-23.8	0.65928	8	4-14,1310-1300;16-21,1299-1294	1-3,1313-1311[UP5];15-15,x-x[BULq]	((((((-(((((((((((...&...))))))))))).))))))	UAGGGU-GAACGGACAACUAG&UUCGUUGUCUGUUCGACCUUG	0	0	NA	1	27.2658	0.995265	0	27.2658	yes
aly-miR858-5p_L-1R+1	TRINITY_DN121181_c1_g1	981	1002	993	-36.1	-24.8	0.686981	6.5	2-10,1001-993;11-20,991-982	1-1,1002-1002[UP5];x-x,992-992[BULt];21-21,981-981[UP3]	.((((((((((.(((((((((.&.)))))))))-)))))))))).	AAAGGUUGAACAAGAUAAUGAU&UUCGUUGUCU-GUUCGACCUUG	5	124.583	0.459394	5	136.329	0.488216	124.583	136.329	yes
aly-miR858-5p_L-1R+1	TRINITY_DN122216_c1_g1	1813	1833	1824	-36.1	-26.8	0.742382	7	3-14,1831-1820;16-20,1818-1814	1-2,1833-1832[UP5];15-15,1819-1819[SIL];21-21,1813-1813[UP3]	.(((((.((((((((((((..&..)))))))))))).))))).	GAAGGUGGAACAGACGAUGCU&UUCGUUGUCUGUUCGACCUUG	2	49.8331	0.231444	0	0	NA	49.8331	0	yes
aly-miR858-5p_L-1R+1	TRINITY_DN124101_c3_g1	104	125	116	-36.1	-25	0.692521	8	1-3,125-123;5-6,121-120;8-13,118-113;14-21,111-104	4-4,122-122[SIL];7-7,119-119[SIL];x-x,112-112[BULt]	((((((((.((((((.((.(((&))).)).))))))-))))))))	CGAGGUCGUAAUAGAGGAGGAG&UUCGUUGUCUGUU-CGACCUUG	0	0	NA	5	136.329	0.737611	0	136.329	yes
aly-miR858-5p_L-1R+1	TRINITY_DN92233_c3_g1	425	451	442	-36.1	-24.1	0.66759	9	1-14,451-438;15-15,432-432;16-20,430-426	x-x,437-433[BULt];x-x,431-431[BULt];21-21,425-425[UP3]	.(((((.(.....((((((((((((((&))))))))))))))-----)-))))).	AAGGGUACUAAUGGGACAGACAGCGAA&UUCGUUGUCUGUUC-----G-ACCUUG	3	74.7496	0.659167	4	109.063	0.936363	74.7496	109.063	yes
aly-miR858-5p_L-1R+1	TRINITY_DN96986_c1_g2	2008	2028	2019	-36.1	-24.8	0.686981	9	4-7,2025-2022;9-12,2020-2017;14-21,2015-2008	1-3,2028-2026[UP5];8-8,2021-2021[SIL];13-13,2016-2016[SIL]	((((((((.((((.((((...&...)))).)))).))))))))	CAAGGUCGUACAGUCAGCUUC&UUCGUUGUCUGUUCGACCUUG	1	24.9165	0.954356	0	0	NA	24.9165	0	yes
aly-miR858-5p_L-1R+1	TRINITY_DN97181_c0_g1	417	437	428	-36.1	-25.4	0.703601	11	4-10,434-428;13-21,425-417	1-3,437-435[UP5];11-12,427-426[SIL]	(((((((((..(((((((...&...)))))))..)))))))))	CAAGGUCGACAAGGCAGCUUU&UUCGUUGUCUGUUCGACCUUG	3	74.7496	0.621663	0	0	NA	74.7496	0	yes
aly-miR858-5p_L-1R+1	TRINITY_DN97565_c1_g2	640	660	651	-36.1	-24.3	0.67313	10	1-10,660-651;13-21,648-640	11-12,650-649[SIL]	(((((((((..((((((((((&))))))))))..)))))))))	CGGGGUCGAUAAGGCGGUGGA&UUCGUUGUCUGUUCGACCUUG	1	24.9165	0.986822	0	0	NA	24.9165	0	yes
aly-miR858-5p_L-1R+1	TRINITY_DN97624_c8_g1	2577	2598	2589	-36.1	-24.2	0.67036	12.5	4-11,2595-2588;12-21,2586-2577	1-3,2598-2596[UP5];x-x,2587-2587[BULt]	((((((((((.((((((((...&...))))))))-))))))))))	CAAGGUCGGGCCGGGCGAUUUG&UUCGUUGUCUG-UUCGACCUUG	364	9069.62	0.620434	447	12187.8	0.916181	9069.62	12187.8	yes
[truncated: 6,452 more rows]

## Sheet: root
Query	Transcript	TStart	TStop	TSlice	MFEperfect	MFEsite	MFEratio	AllenScore	Paired	Unpaired	Structure	Sequence	DegradomeRawReads(DCK_R)	DegradomeNormReads(DCK_R)	DegradomePval(DCK_R)	DegradomeRawReads(D200_R)	DegradomeNormReads(D200_R)	DegradomePval(D200_R)	DCK_R	D200_R	significant
[truncated: 11,393 more rows]
