# Supplementary material for: Identification of Small RNAs Associated with Salt Stress in Chrysanthemums through High-Throughput Sequencing and Bioinformatics Analysis
Source: Genes (Basel). 2023 Feb 23;14(3):561. doi: 10.3390/genes14030561 (PMC10048073; doi:10.3390/genes14030561)
Supplement: Supplementary file 1 [file genes-14-00561-s001.zip › table S5.xlsx]

## Sheet: Sheet1
	category 0	category 1	category2	category 3	category 4
leaf	142	23	908	582	731
root	181	22	1639	1129	1209
