# Supplementary material for: Identification of Small RNAs Associated with Salt Stress in Chrysanthemums through High-Throughput Sequencing and Bioinformatics Analysis
Source: Genes (Basel). 2023 Feb 23;14(3):561. doi: 10.3390/genes14030561 (PMC10048073; doi:10.3390/genes14030561)
Supplement: Supplementary file 1 [file genes-14-00561-s001.zip › table S6.xlsx]

## Sheet: leaf
GO_ID	GO_Term	GO_function	GO_class	Genes	S gene number	TS gene number	B gene number	TB gene number	pvalue
GO:0005515	protein binding	molecular_function	4	TRINITY_DN100034_c3_g2;TRINITY_DN100076_c0_g1;TRINITY_DN100271_c0_g3;TRINITY_DN100308_c0_g1;TRINITY_DN100374_c0_g1;TRINITY_DN100484_c1_g4;TRINITY_DN100512_c0_g1;TRINITY_DN100531_c0_g3;TRINITY_DN100585_c3_g2;TRINITY_DN100657_c3_g4;TRINITY_DN100711_c2_g1;TRINITY_DN100731_c0_g1;TRINITY_DN100731_c0_g2;TRINITY_DN100954_c1_g1;TRINITY_DN101005_c0_g3;TRINITY_DN101117_c1_g1;TRINITY_DN101261_c1_g1;TRINITY_…	603	3857	3084	25617	3.19411e-13
GO:0009507	chloroplast	cellular_component	7	TRINITY_DN100027_c0_g1;TRINITY_DN100034_c3_g2;TRINITY_DN100037_c0_g2;TRINITY_DN100155_c0_g1;TRINITY_DN100308_c0_g1;TRINITY_DN100429_c1_g2;TRINITY_DN100463_c0_g1;TRINITY_DN100484_c1_g4;TRINITY_DN100659_c1_g1;TRINITY_DN100659_c1_g2;TRINITY_DN101039_c0_g1;TRINITY_DN101209_c0_g2;TRINITY_DN101261_c1_g1;TRINITY_DN101261_c2_g1;TRINITY_DN101274_c0_g1;TRINITY_DN101310_c1_g1;TRINITY_DN101445_c1_g1;TRINITY_…	568	3857	3038	25617	3.30857e-09
GO:0005634	nucleus	cellular_component	6	TRINITY_DN100075_c1_g1;TRINITY_DN100076_c0_g1;TRINITY_DN100153_c1_g5;TRINITY_DN100308_c0_g1;TRINITY_DN100374_c0_g1;TRINITY_DN100382_c0_g1;TRINITY_DN100384_c5_g1;TRINITY_DN100512_c0_g1;TRINITY_DN100517_c0_g1;TRINITY_DN100531_c0_g3;TRINITY_DN100546_c0_g1;TRINITY_DN100564_c0_g2;TRINITY_DN100585_c3_g2;TRINITY_DN100608_c0_g1;TRINITY_DN100620_c0_g1;TRINITY_DN100652_c0_g1;TRINITY_DN100727_c0_g3;TRINITY_…	1210	3857	7059	25617	6.93805e-09
GO:0003729	mRNA binding	molecular_function	7	TRINITY_DN100436_c0_g3;TRINITY_DN101261_c2_g1;TRINITY_DN103074_c1_g2;TRINITY_DN103259_c0_g2;TRINITY_DN103699_c2_g1;TRINITY_DN104030_c2_g2;TRINITY_DN104442_c2_g2;TRINITY_DN104655_c1_g1;TRINITY_DN104795_c0_g1;TRINITY_DN104959_c0_g1;TRINITY_DN105123_c3_g1;TRINITY_DN105201_c3_g2;TRINITY_DN105241_c0_g1;TRINITY_DN105605_c0_g2;TRINITY_DN106405_c1_g1;TRINITY_DN106752_c1_g1;TRINITY_DN106777_c0_g6;TRINITY_…	112	3857	440	25617	7.34401e-09
GO:0009579	thylakoid	cellular_component	5	TRINITY_DN100429_c1_g2;TRINITY_DN102104_c0_g1;TRINITY_DN102292_c2_g2;TRINITY_DN103178_c0_g1;TRINITY_DN103327_c1_g1;TRINITY_DN103420_c1_g2;TRINITY_DN104324_c3_g1;TRINITY_DN104920_c2_g1;TRINITY_DN105367_c0_g1;TRINITY_DN106894_c2_g1;TRINITY_DN107248_c0_g2;TRINITY_DN107516_c0_g3;TRINITY_DN108003_c0_g1;TRINITY_DN108163_c0_g1;TRINITY_DN109048_c0_g1;TRINITY_DN109118_c0_g1;TRINITY_DN109686_c2_g1;TRINITY_…	65	3857	213	25617	7.70801e-09
GO:0009941	chloroplast envelope	cellular_component	7	TRINITY_DN100034_c3_g2;TRINITY_DN100429_c1_g2;TRINITY_DN100484_c1_g4;TRINITY_DN100614_c1_g6;TRINITY_DN100659_c1_g2;TRINITY_DN101076_c1_g1;TRINITY_DN101767_c1_g1;TRINITY_DN102013_c0_g2;TRINITY_DN102292_c2_g2;TRINITY_DN102579_c0_g1;TRINITY_DN102798_c0_g3;TRINITY_DN102888_c0_g4;TRINITY_DN103222_c0_g2;TRINITY_DN103327_c1_g1;TRINITY_DN103342_c0_g1;TRINITY_DN104280_c1_g1;TRINITY_DN104324_c3_g1;TRINITY_…	157	3857	689	25617	3.48294e-08
GO:0051082	unfolded protein binding	molecular_function	5	TRINITY_DN100484_c1_g4;TRINITY_DN100807_c0_g1;TRINITY_DN103107_c0_g1;TRINITY_DN103342_c0_g1;TRINITY_DN104005_c3_g1;TRINITY_DN104920_c2_g1;TRINITY_DN105038_c0_g2;TRINITY_DN105076_c1_g2;TRINITY_DN107405_c1_g1;TRINITY_DN107405_c3_g2;TRINITY_DN107567_c2_g1;TRINITY_DN108160_c1_g2;TRINITY_DN108771_c1_g2;TRINITY_DN109044_c0_g1;TRINITY_DN109436_c0_g1;TRINITY_DN109626_c0_g3;TRINITY_DN109963_c1_g1;TRINITY_…	51	3857	160	25617	6.49034e-08
GO:0009570	chloroplast stroma	cellular_component	8	TRINITY_DN100034_c3_g2;TRINITY_DN100037_c0_g2;TRINITY_DN100484_c1_g4;TRINITY_DN100659_c1_g2;TRINITY_DN101039_c0_g1;TRINITY_DN101709_c0_g2;TRINITY_DN102104_c0_g1;TRINITY_DN102292_c2_g2;TRINITY_DN102373_c2_g1;TRINITY_DN102970_c1_g2;TRINITY_DN103222_c0_g2;TRINITY_DN103342_c0_g1;TRINITY_DN104156_c0_g2;TRINITY_DN104191_c1_g2;TRINITY_DN104280_c1_g1;TRINITY_DN104316_c1_g3;TRINITY_DN104324_c3_g1;TRINITY_…	175	3857	796	25617	8.25341e-08
GO:0009535	chloroplast thylakoid membrane	cellular_component	8	TRINITY_DN100034_c3_g2;TRINITY_DN100429_c1_g2;TRINITY_DN100519_c3_g2;TRINITY_DN100614_c1_g6;TRINITY_DN101076_c1_g1;TRINITY_DN101209_c0_g2;TRINITY_DN101274_c0_g1;TRINITY_DN101445_c1_g1;TRINITY_DN101457_c0_g2;TRINITY_DN102888_c0_g4;TRINITY_DN102915_c1_g1;TRINITY_DN103222_c0_g2;TRINITY_DN103327_c1_g1;TRINITY_DN103420_c1_g2;TRINITY_DN104324_c3_g1;TRINITY_DN104718_c1_g1;TRINITY_DN104970_c0_g1;TRINITY_…	104	3857	424	25617	1.83027e-07
GO:0010319	stromule	cellular_component	7	TRINITY_DN100484_c1_g4;TRINITY_DN104316_c1_g3;TRINITY_DN104324_c3_g1;TRINITY_DN108003_c0_g1;TRINITY_DN109044_c0_g1;TRINITY_DN110094_c3_g2;TRINITY_DN111089_c0_g4;TRINITY_DN111696_c1_g1;TRINITY_DN112087_c2_g3;TRINITY_DN112260_c1_g1;TRINITY_DN112260_c1_g3;TRINITY_DN113221_c0_g2;TRINITY_DN113626_c0_g1;TRINITY_DN114663_c1_g2;TRINITY_DN114716_c2_g1;TRINITY_DN115195_c2_g3;TRINITY_DN116472_c1_g1;TRINITY_…	30	3857	76	25617	1.9517e-07
GO:0005829	cytosol	cellular_component	6	TRINITY_DN100034_c3_g2;TRINITY_DN100120_c0_g1;TRINITY_DN100335_c0_g1;TRINITY_DN100376_c0_g1;TRINITY_DN100484_c1_g4;TRINITY_DN100536_c0_g1;TRINITY_DN100579_c2_g1;TRINITY_DN100659_c1_g1;TRINITY_DN100735_c0_g1;TRINITY_DN100816_c1_g3;TRINITY_DN100844_c0_g1;TRINITY_DN101005_c0_g3;TRINITY_DN101073_c3_g1;TRINITY_DN101261_c2_g1;TRINITY_DN101482_c1_g1;TRINITY_DN101526_c0_g1;TRINITY_DN101635_c0_g1;TRINITY_…	569	3857	3200	25617	3.46085e-06
GO:0009534	chloroplast thylakoid	cellular_component	7	TRINITY_DN100429_c1_g2;TRINITY_DN101274_c0_g1;TRINITY_DN102013_c0_g2;TRINITY_DN102104_c0_g1;TRINITY_DN103327_c1_g1;TRINITY_DN104316_c1_g3;TRINITY_DN104718_c1_g1;TRINITY_DN104970_c0_g1;TRINITY_DN105041_c0_g1;TRINITY_DN105169_c0_g1;TRINITY_DN106894_c2_g1;TRINITY_DN108003_c0_g1;TRINITY_DN108564_c1_g1;TRINITY_DN108858_c0_g1;TRINITY_DN109118_c0_g1;TRINITY_DN109127_c1_g1;TRINITY_DN109288_c1_g1;TRINITY_…	53	3857	190	25617	3.78557e-06
GO:0005730	nucleolus	cellular_component	6	TRINITY_DN101451_c0_g2;TRINITY_DN101877_c3_g1;TRINITY_DN101993_c0_g3;TRINITY_DN102026_c0_g1;TRINITY_DN102379_c0_g1;TRINITY_DN103980_c0_g2;TRINITY_DN104098_c0_g1;TRINITY_DN104475_c1_g4;TRINITY_DN104696_c0_g1;TRINITY_DN105038_c0_g2;TRINITY_DN105094_c1_g2;TRINITY_DN105959_c2_g6;TRINITY_DN106573_c1_g1;TRINITY_DN106777_c0_g6;TRINITY_DN107204_c1_g2;TRINITY_DN107230_c0_g1;TRINITY_DN107360_c0_g1;TRINITY_…	104	3857	451	25617	3.90962e-06
GO:0006355	regulation of transcription, DNA-templated	biological_process	8	TRINITY_DN100075_c1_g1;TRINITY_DN100153_c1_g5;TRINITY_DN100374_c0_g1;TRINITY_DN100512_c0_g1;TRINITY_DN100585_c3_g2;TRINITY_DN100608_c0_g1;TRINITY_DN100620_c0_g1;TRINITY_DN100652_c0_g1;TRINITY_DN100813_c0_g1;TRINITY_DN101075_c2_g1;TRINITY_DN101261_c1_g1;TRINITY_DN101333_c0_g5;TRINITY_DN101566_c1_g5;TRINITY_DN101740_c0_g3;TRINITY_DN101799_c1_g4;TRINITY_DN102355_c0_g2;TRINITY_DN102639_c1_g1;TRINITY_…	286	3857	1497	25617	6.91177e-06
GO:0003723	RNA binding	molecular_function	6	TRINITY_DN100755_c0_g1;TRINITY_DN101261_c2_g1;TRINITY_DN102379_c0_g1;TRINITY_DN102676_c0_g1;TRINITY_DN102733_c1_g2;TRINITY_DN103402_c1_g1;TRINITY_DN103947_c0_g1;TRINITY_DN104402_c2_g2;TRINITY_DN104655_c1_g1;TRINITY_DN104959_c0_g1;TRINITY_DN105123_c3_g1;TRINITY_DN105201_c3_g2;TRINITY_DN106332_c1_g3;TRINITY_DN106332_c1_g4;TRINITY_DN106920_c3_g3;TRINITY_DN107226_c0_g1;TRINITY_DN107325_c0_g1;TRINITY_…	149	3857	710	25617	1.10785e-05
GO:0006457	protein folding	biological_process	4	TRINITY_DN100484_c1_g4;TRINITY_DN101750_c0_g1;TRINITY_DN102144_c0_g2;TRINITY_DN102373_c2_g1;TRINITY_DN102915_c1_g1;TRINITY_DN103107_c0_g1;TRINITY_DN103210_c0_g1;TRINITY_DN103342_c0_g1;TRINITY_DN103694_c0_g2;TRINITY_DN103978_c0_g1;TRINITY_DN104920_c2_g1;TRINITY_DN105038_c0_g2;TRINITY_DN106266_c0_g1;TRINITY_DN106714_c1_g4;TRINITY_DN107360_c0_g1;TRINITY_DN107405_c1_g1;TRINITY_DN107405_c3_g2;TRINITY_…	86	3857	366	25617	1.22118e-05
GO:0030687	preribosome, large subunit precursor	cellular_component	6	TRINITY_DN102026_c0_g1;TRINITY_DN110604_c0_g4;TRINITY_DN112483_c2_g1;TRINITY_DN112673_c0_g3;TRINITY_DN112976_c2_g1;TRINITY_DN115917_c0_g1;TRINITY_DN115917_c0_g3;TRINITY_DN116894_c4_g1;TRINITY_DN117972_c0_g3;TRINITY_DN118502_c1_g1;TRINITY_DN122558_c1_g2;TRINITY_DN122618_c2_g1;TRINITY_DN91377_c2_g7;TRINITY_DN92388_c0_g2;TRINITY_DN92899_c2_g1;TRINITY_DN93324_c3_g1;TRINITY_DN93754_c3_g1;TRINITY_DN972…	18	3857	42	25617	1.39722e-05
GO:0045036	protein targeting to chloroplast	biological_process	12	TRINITY_DN100034_c3_g2;TRINITY_DN104920_c2_g1;TRINITY_DN105545_c0_g1;TRINITY_DN109578_c2_g2;TRINITY_DN109720_c1_g3;TRINITY_DN109963_c1_g1;TRINITY_DN112858_c0_g1;TRINITY_DN118878_c1_g1;TRINITY_DN120833_c0_g2;TRINITY_DN120833_c1_g1;TRINITY_DN123682_c3_g3;TRINITY_DN123711_c2_g1;TRINITY_DN123711_c2_g5;TRINITY_DN93844_c1_g2;TRINITY_DN94073_c0_g1;TRINITY_DN95846_c0_g1;TRINITY_DN96905_c1_g2	17	3857	39	25617	1.84177e-05
GO:0003700	DNA binding transcription factor activity	molecular_function	4	TRINITY_DN100153_c1_g5;TRINITY_DN100374_c0_g1;TRINITY_DN100512_c0_g1;TRINITY_DN100585_c3_g2;TRINITY_DN100608_c0_g1;TRINITY_DN100620_c0_g1;TRINITY_DN100652_c0_g1;TRINITY_DN101075_c2_g1;TRINITY_DN101261_c1_g1;TRINITY_DN101333_c0_g5;TRINITY_DN101566_c1_g5;TRINITY_DN101799_c1_g4;TRINITY_DN102355_c0_g2;TRINITY_DN102598_c1_g1;TRINITY_DN102639_c1_g1;TRINITY_DN103012_c0_g4;TRINITY_DN103031_c0_g3;TRINITY_…	226	3857	1162	25617	1.9791e-05
GO:0003676	nucleic acid binding	molecular_function	5	TRINITY_DN101281_c0_g1;TRINITY_DN101350_c0_g1;TRINITY_DN102251_c1_g1;TRINITY_DN102379_c0_g1;TRINITY_DN103012_c0_g4;TRINITY_DN103039_c0_g2;TRINITY_DN104402_c2_g2;TRINITY_DN104795_c0_g1;TRINITY_DN105123_c3_g1;TRINITY_DN105241_c0_g1;TRINITY_DN107279_c0_g1;TRINITY_DN107351_c1_g1;TRINITY_DN107378_c0_g1;TRINITY_DN107597_c2_g1;TRINITY_DN107774_c0_g1;TRINITY_DN107855_c1_g2;TRINITY_DN108375_c0_g3;TRINITY_…	75	3857	317	25617	3.33026e-05
GO:0019253	reductive pentose-phosphate cycle	biological_process	8	TRINITY_DN102292_c2_g2;TRINITY_DN104324_c3_g1;TRINITY_DN110094_c3_g2;TRINITY_DN110421_c5_g1;TRINITY_DN114716_c2_g1;TRINITY_DN121114_c0_g1;TRINITY_DN122303_c1_g2;TRINITY_DN124132_c2_g2;TRINITY_DN88770_c0_g1;TRINITY_DN93088_c0_g2;TRINITY_DN95226_c3_g1;TRINITY_DN97581_c2_g1;TRINITY_DN98759_c5_g2;TRINITY_DN99524_c0_g3	14	3857	30	25617	3.97792e-05
GO:0005623	cell	cellular_component	3	TRINITY_DN101117_c1_g1;TRINITY_DN101709_c0_g2;TRINITY_DN104920_c2_g1;TRINITY_DN109963_c1_g1;TRINITY_DN110291_c3_g1;TRINITY_DN111574_c1_g2;TRINITY_DN112858_c0_g1;TRINITY_DN113882_c0_g1;TRINITY_DN116222_c0_g1;TRINITY_DN117925_c0_g1;TRINITY_DN118246_c0_g2;TRINITY_DN118547_c0_g2;TRINITY_DN118878_c1_g1;TRINITY_DN119481_c0_g4;TRINITY_DN120833_c0_g2;TRINITY_DN120833_c1_g1;TRINITY_DN122362_c0_g1;TRINITY_…	22	3857	61	25617	4.27629e-05
GO:0000398	mRNA splicing, via spliceosome	biological_process	13	TRINITY_DN100755_c0_g1;TRINITY_DN101977_c0_g4;TRINITY_DN102733_c1_g2;TRINITY_DN103947_c0_g1;TRINITY_DN107453_c1_g1;TRINITY_DN108008_c3_g2;TRINITY_DN109749_c0_g4;TRINITY_DN112647_c1_g2;TRINITY_DN112955_c0_g1;TRINITY_DN113012_c0_g1;TRINITY_DN113725_c1_g1;TRINITY_DN114084_c1_g1;TRINITY_DN114084_c1_g2;TRINITY_DN114757_c0_g3;TRINITY_DN116194_c0_g1;TRINITY_DN116194_c0_g2;TRINITY_DN116456_c0_g1;TRINITY_…	38	3857	133	25617	4.75219e-05
GO:0009536	plastid	cellular_component	6	TRINITY_DN100034_c3_g2;TRINITY_DN100308_c0_g1;TRINITY_DN100401_c0_g1;TRINITY_DN100463_c0_g1;TRINITY_DN101809_c0_g1;TRINITY_DN102411_c1_g1;TRINITY_DN102979_c0_g1;TRINITY_DN103342_c0_g1;TRINITY_DN104191_c1_g2;TRINITY_DN104280_c1_g1;TRINITY_DN105545_c0_g1;TRINITY_DN105895_c2_g1;TRINITY_DN106755_c0_g1;TRINITY_DN108442_c0_g2;TRINITY_DN110448_c1_g1;TRINITY_DN110556_c0_g2;TRINITY_DN110751_c0_g1;TRINITY_…	74	3857	316	25617	5.35336e-05
GO:0009409	response to cold	biological_process	5	TRINITY_DN100484_c1_g4;TRINITY_DN100561_c0_g4;TRINITY_DN101261_c2_g1;TRINITY_DN102013_c0_g2;TRINITY_DN102624_c0_g1;TRINITY_DN103442_c0_g1;TRINITY_DN103833_c7_g1;TRINITY_DN103842_c3_g1;TRINITY_DN104316_c1_g3;TRINITY_DN104324_c3_g1;TRINITY_DN104655_c1_g1;TRINITY_DN104920_c2_g1;TRINITY_DN106352_c0_g3;TRINITY_DN106502_c1_g1;TRINITY_DN106914_c0_g1;TRINITY_DN107226_c0_g1;TRINITY_DN107597_c2_g1;TRINITY_…	82	3857	360	25617	6.14628e-05
GO:0003677	DNA binding	molecular_function	6	TRINITY_DN100075_c1_g1;TRINITY_DN100153_c1_g5;TRINITY_DN100342_c1_g1;TRINITY_DN100374_c0_g1;TRINITY_DN100608_c0_g1;TRINITY_DN100813_c0_g1;TRINITY_DN101075_c2_g1;TRINITY_DN101177_c0_g4;TRINITY_DN101261_c1_g1;TRINITY_DN101333_c0_g5;TRINITY_DN102251_c1_g1;TRINITY_DN102402_c0_g1;TRINITY_DN102402_c0_g3;TRINITY_DN102639_c1_g1;TRINITY_DN103012_c0_g4;TRINITY_DN103223_c6_g2;TRINITY_DN103693_c2_g1;TRINITY_…	251	3857	1342	25617	0.000107942
GO:0006397	mRNA processing	biological_process	10	TRINITY_DN101350_c0_g1;TRINITY_DN103003_c0_g3;TRINITY_DN103039_c0_g2;TRINITY_DN104021_c0_g1;TRINITY_DN104030_c2_g2;TRINITY_DN104222_c0_g1;TRINITY_DN106332_c1_g3;TRINITY_DN106332_c1_g4;TRINITY_DN107339_c0_g1;TRINITY_DN108003_c0_g1;TRINITY_DN108547_c0_g4;TRINITY_DN109496_c0_g2;TRINITY_DN109686_c2_g1;TRINITY_DN110953_c0_g1;TRINITY_DN111089_c0_g4;TRINITY_DN111452_c0_g1;TRINITY_DN112889_c0_g1;TRINITY_…	42	3857	161	25617	0.000189799
GO:0010287	plastoglobule	cellular_component	8	TRINITY_DN100429_c1_g2;TRINITY_DN100614_c1_g6;TRINITY_DN101076_c1_g1;TRINITY_DN102104_c0_g1;TRINITY_DN105041_c0_g1;TRINITY_DN108301_c0_g1;TRINITY_DN108301_c1_g1;TRINITY_DN108301_c1_g3;TRINITY_DN108301_c1_g4;TRINITY_DN108301_c1_g6;TRINITY_DN109048_c0_g1;TRINITY_DN109118_c0_g1;TRINITY_DN109127_c1_g1;TRINITY_DN109783_c4_g1;TRINITY_DN110359_c4_g2;TRINITY_DN110381_c1_g3;TRINITY_DN111696_c1_g1;TRINITY_…	35	3857	128	25617	0.000238549
GO:0006625	protein targeting to peroxisome	biological_process	12	TRINITY_DN107477_c0_g1;TRINITY_DN107770_c2_g1;TRINITY_DN117925_c0_g1;TRINITY_DN122862_c0_g1;TRINITY_DN94519_c2_g2;TRINITY_DN99193_c0_g1	6	3857	8	25617	0.00024683
GO:0009853	photorespiration	biological_process	6	TRINITY_DN100037_c0_g2;TRINITY_DN100155_c0_g1;TRINITY_DN102292_c2_g2;TRINITY_DN103620_c0_g1;TRINITY_DN104316_c1_g3;TRINITY_DN108767_c0_g2;TRINITY_DN113711_c2_g1;TRINITY_DN113711_c2_g2;TRINITY_DN115195_c2_g3;TRINITY_DN121114_c0_g1;TRINITY_DN123640_c1_g1;TRINITY_DN88071_c0_g3;TRINITY_DN99157_c0_g1	13	3857	31	25617	0.000283902
GO:0042803	protein homodimerization activity	molecular_function	6	TRINITY_DN100271_c0_g3;TRINITY_DN101257_c1_g1;TRINITY_DN101310_c1_g1;TRINITY_DN102442_c1_g1;TRINITY_DN102579_c0_g1;TRINITY_DN103342_c0_g1;TRINITY_DN104030_c2_g2;TRINITY_DN105504_c0_g1;TRINITY_DN106732_c0_g1;TRINITY_DN106991_c0_g2;TRINITY_DN106991_c0_g4;TRINITY_DN107741_c0_g1;TRINITY_DN107859_c0_g1;TRINITY_DN108579_c0_g2;TRINITY_DN108966_c1_g4;TRINITY_DN109576_c3_g2;TRINITY_DN110093_c1_g1;TRINITY_…	46	3857	185	25617	0.000319036
GO:0016607	nuclear speck	cellular_component	8	TRINITY_DN105680_c0_g2;TRINITY_DN106302_c1_g1;TRINITY_DN106332_c1_g3;TRINITY_DN106332_c1_g4;TRINITY_DN108008_c3_g2;TRINITY_DN108547_c0_g4;TRINITY_DN110953_c0_g1;TRINITY_DN112647_c1_g2;TRINITY_DN112889_c0_g1;TRINITY_DN112986_c1_g1;TRINITY_DN113672_c1_g4;TRINITY_DN116456_c0_g1;TRINITY_DN117145_c0_g1;TRINITY_DN117518_c0_g2;TRINITY_DN118644_c1_g2;TRINITY_DN118722_c1_g1;TRINITY_DN120747_c0_g3;TRINITY_…	20	3857	61	25617	0.000410611
GO:0045037	protein import into chloroplast stroma	biological_process	11	TRINITY_DN100034_c3_g2;TRINITY_DN102579_c0_g1;TRINITY_DN103342_c0_g1;TRINITY_DN105545_c0_g1;TRINITY_DN111166_c3_g1;TRINITY_DN113882_c0_g1;TRINITY_DN118246_c0_g2;TRINITY_DN119449_c0_g1;TRINITY_DN123711_c2_g1;TRINITY_DN123711_c2_g5;TRINITY_DN95846_c0_g1;TRINITY_DN96905_c1_g2	12	3857	29	25617	0.000561761
GO:0005983	starch catabolic process	biological_process	10	TRINITY_DN104191_c1_g2;TRINITY_DN110724_c0_g1;TRINITY_DN111495_c2_g3;TRINITY_DN117136_c1_g3;TRINITY_DN121198_c1_g1;TRINITY_DN121693_c0_g1;TRINITY_DN121693_c0_g2;TRINITY_DN123042_c2_g4;TRINITY_DN123593_c6_g1;TRINITY_DN124211_c2_g1;TRINITY_DN90506_c1_g1;TRINITY_DN91960_c1_g3;TRINITY_DN92515_c2_g1	13	3857	33	25617	0.000587638
GO:0048046	apoplast	cellular_component	4	TRINITY_DN100037_c0_g2;TRINITY_DN100484_c1_g4;TRINITY_DN101261_c2_g1;TRINITY_DN102292_c2_g2;TRINITY_DN104316_c1_g3;TRINITY_DN104324_c3_g1;TRINITY_DN104655_c1_g1;TRINITY_DN105094_c1_g2;TRINITY_DN105367_c0_g1;TRINITY_DN105447_c0_g1;TRINITY_DN106319_c0_g1;TRINITY_DN106323_c0_g1;TRINITY_DN106352_c0_g3;TRINITY_DN107405_c1_g1;TRINITY_DN108163_c0_g1;TRINITY_DN108564_c1_g1;TRINITY_DN108815_c1_g1;TRINITY_…	87	3857	413	25617	0.000606954
GO:0008728	GTP diphosphokinase activity	molecular_function	7	TRINITY_DN104075_c0_g2;TRINITY_DN112960_c6_g3;TRINITY_DN114440_c0_g1;TRINITY_DN117171_c0_g1;TRINITY_DN118586_c1_g1;TRINITY_DN122360_c1_g1;TRINITY_DN123933_c1_g2;TRINITY_DN124730_c10_g2	8	3857	15	25617	0.000622938
GO:0042644	chloroplast nucleoid	cellular_component	5	TRINITY_DN107299_c0_g2;TRINITY_DN111962_c1_g1;TRINITY_DN112868_c0_g2;TRINITY_DN114349_c0_g2;TRINITY_DN114524_c0_g2;TRINITY_DN116013_c0_g1;TRINITY_DN116013_c0_g2;TRINITY_DN117932_c0_g1;TRINITY_DN121110_c0_g1;TRINITY_DN123186_c2_g1	10	3857	22	25617	0.000667632
GO:0019264	glycine biosynthetic process from serine	biological_process	13	TRINITY_DN104316_c1_g3;TRINITY_DN115195_c2_g3;TRINITY_DN116316_c0_g1;TRINITY_DN116316_c1_g6;TRINITY_DN118508_c0_g1;TRINITY_DN123640_c1_g1;TRINITY_DN88071_c0_g3	7	3857	12	25617	0.000685665
GO:0010501	RNA secondary structure unwinding	biological_process	9	TRINITY_DN100783_c0_g1;TRINITY_DN101261_c2_g1;TRINITY_DN101385_c0_g1;TRINITY_DN102156_c0_g1;TRINITY_DN102684_c2_g1;TRINITY_DN104527_c1_g1;TRINITY_DN104655_c1_g1;TRINITY_DN109187_c2_g10;TRINITY_DN112163_c0_g2;TRINITY_DN113025_c1_g1;TRINITY_DN113564_c1_g3;TRINITY_DN113809_c1_g1;TRINITY_DN114956_c2_g2;TRINITY_DN115401_c0_g1;TRINITY_DN116194_c0_g1;TRINITY_DN116194_c0_g2;TRINITY_DN116665_c2_g2;TRINITY…	35	3857	135	25617	0.000701983
GO:0006351	transcription, DNA-templated	biological_process	8	TRINITY_DN100075_c1_g1;TRINITY_DN100153_c1_g5;TRINITY_DN100374_c0_g1;TRINITY_DN100608_c0_g1;TRINITY_DN100813_c0_g1;TRINITY_DN101075_c2_g1;TRINITY_DN101261_c1_g1;TRINITY_DN101333_c0_g5;TRINITY_DN101799_c1_g4;TRINITY_DN102639_c1_g1;TRINITY_DN102664_c0_g1;TRINITY_DN103031_c0_g3;TRINITY_DN103031_c0_g4;TRINITY_DN103173_c0_g2;TRINITY_DN103223_c6_g2;TRINITY_DN103491_c0_g3;TRINITY_DN104042_c0_g2;TRINITY_…	223	3857	1219	25617	0.000889297
GO:0005654	nucleoplasm	cellular_component	6	TRINITY_DN101564_c1_g5;TRINITY_DN102026_c0_g1;TRINITY_DN102402_c0_g1;TRINITY_DN104098_c0_g1;TRINITY_DN104711_c0_g2;TRINITY_DN105241_c0_g1;TRINITY_DN107855_c1_g2;TRINITY_DN109009_c0_g2;TRINITY_DN111299_c1_g3;TRINITY_DN112578_c1_g1;TRINITY_DN113497_c1_g4;TRINITY_DN113497_c1_g5;TRINITY_DN113899_c0_g2;TRINITY_DN116167_c0_g1;TRINITY_DN117145_c0_g1;TRINITY_DN117444_c0_g1;TRINITY_DN117976_c0_g5;TRINITY_…	35	3857	138	25617	0.00107257
GO:0042594	response to starvation	biological_process	5	TRINITY_DN104075_c0_g2;TRINITY_DN105122_c2_g2;TRINITY_DN113643_c0_g1;TRINITY_DN114440_c0_g1;TRINITY_DN117096_c0_g1;TRINITY_DN117171_c0_g1;TRINITY_DN118586_c1_g1;TRINITY_DN121264_c2_g2;TRINITY_DN122360_c1_g1;TRINITY_DN123933_c1_g2;TRINITY_DN124730_c10_g2	11	3857	27	25617	0.00111046
GO:0042538	hyperosmotic salinity response	biological_process	7	TRINITY_DN102228_c0_g2;TRINITY_DN107949_c0_g2;TRINITY_DN107979_c0_g1;TRINITY_DN108109_c1_g1;TRINITY_DN109572_c0_g1;TRINITY_DN110710_c0_g1;TRINITY_DN112446_c0_g1;TRINITY_DN113396_c0_g2;TRINITY_DN114715_c2_g2;TRINITY_DN119045_c3_g3;TRINITY_DN119045_c3_g4;TRINITY_DN119045_c3_g5;TRINITY_DN119359_c0_g3;TRINITY_DN119783_c3_g2;TRINITY_DN123112_c0_g1;TRINITY_DN123112_c1_g2;TRINITY_DN124796_c3_g1;TRINITY_…	21	3857	70	25617	0.0011134
GO:0009567	double fertilization forming a zygote and endosperm	biological_process	5	TRINITY_DN104870_c0_g1;TRINITY_DN109336_c1_g1;TRINITY_DN113852_c0_g1;TRINITY_DN114773_c2_g3;TRINITY_DN120569_c0_g2;TRINITY_DN90468_c0_g2;TRINITY_DN96023_c0_g1	7	3857	13	25617	0.00129263
GO:0010017	red or far-red light signaling pathway	biological_process	5	TRINITY_DN109153_c0_g3;TRINITY_DN109955_c0_g1;TRINITY_DN117904_c1_g1;TRINITY_DN119458_c2_g4;TRINITY_DN121349_c0_g1;TRINITY_DN124710_c4_g1;TRINITY_DN88414_c0_g2;TRINITY_DN90020_c0_g1;TRINITY_DN99684_c0_g1	9	3857	20	25617	0.00135925
GO:0005524	ATP binding	molecular_function	5	TRINITY_DN100034_c3_g2;TRINITY_DN100271_c0_g3;TRINITY_DN100433_c0_g1;TRINITY_DN100484_c1_g4;TRINITY_DN100531_c0_g3;TRINITY_DN100564_c0_g2;TRINITY_DN100807_c0_g1;TRINITY_DN101257_c1_g1;TRINITY_DN101297_c1_g3;TRINITY_DN101362_c0_g1;TRINITY_DN101614_c1_g1;TRINITY_DN101635_c0_g1;TRINITY_DN101673_c0_g1;TRINITY_DN101689_c0_g1;TRINITY_DN102140_c4_g2;TRINITY_DN102456_c1_g1;TRINITY_DN102624_c0_g1;TRINITY_…	340	3857	1948	25617	0.00137199
GO:0045892	negative regulation of transcription, DNA-templated	biological_process	9	TRINITY_DN104437_c4_g1;TRINITY_DN104696_c0_g1;TRINITY_DN105276_c0_g1;TRINITY_DN106197_c0_g1;TRINITY_DN106732_c0_g1;TRINITY_DN107240_c0_g1;TRINITY_DN107597_c2_g1;TRINITY_DN109153_c0_g3;TRINITY_DN109955_c0_g1;TRINITY_DN110501_c5_g1;TRINITY_DN110654_c1_g2;TRINITY_DN111093_c1_g1;TRINITY_DN113048_c2_g2;TRINITY_DN115810_c2_g1;TRINITY_DN116788_c3_g1;TRINITY_DN117880_c1_g1;TRINITY_DN117932_c0_g1;TRINITY_…	33	3857	130	25617	0.00144133
GO:0004004	ATP-dependent RNA helicase activity	molecular_function	11	TRINITY_DN100783_c0_g1;TRINITY_DN101385_c0_g1;TRINITY_DN102156_c0_g1;TRINITY_DN102684_c2_g1;TRINITY_DN102826_c1_g1;TRINITY_DN104527_c1_g1;TRINITY_DN109187_c2_g10;TRINITY_DN111822_c0_g1;TRINITY_DN112163_c0_g2;TRINITY_DN113025_c1_g1;TRINITY_DN113564_c1_g3;TRINITY_DN113725_c1_g1;TRINITY_DN113809_c1_g1;TRINITY_DN114956_c2_g2;TRINITY_DN115401_c0_g1;TRINITY_DN116194_c0_g1;TRINITY_DN116194_c0_g2;TRINITY…	40	3857	167	25617	0.0016191
GO:0009658	chloroplast organization	biological_process	7	TRINITY_DN100034_c3_g2;TRINITY_DN105545_c0_g1;TRINITY_DN107339_c0_g1;TRINITY_DN107681_c1_g1;TRINITY_DN109358_c3_g2;TRINITY_DN109465_c0_g2;TRINITY_DN110359_c4_g2;TRINITY_DN110751_c0_g1;TRINITY_DN111835_c1_g3;TRINITY_DN112663_c0_g2;TRINITY_DN113696_c0_g3;TRINITY_DN114349_c0_g2;TRINITY_DN114524_c0_g2;TRINITY_DN115584_c0_g1;TRINITY_DN115948_c0_g1;TRINITY_DN116281_c1_g1;TRINITY_DN116281_c1_g4;TRINITY_…	35	3857	142	25617	0.00182594
GO:0006368	transcription elongation from RNA polymerase II promoter	biological_process	9	TRINITY_DN100731_c0_g1;TRINITY_DN100731_c0_g2;TRINITY_DN106360_c0_g2;TRINITY_DN106494_c0_g1;TRINITY_DN107279_c0_g1;TRINITY_DN117161_c0_g2;TRINITY_DN119777_c1_g1;TRINITY_DN119777_c1_g3;TRINITY_DN120568_c0_g1;TRINITY_DN122491_c0_g1;TRINITY_DN123904_c2_g1;TRINITY_DN97801_c1_g2;TRINITY_DN98653_c1_g1	13	3857	37	25617	0.00203091
GO:0071013	catalytic step 2 spliceosome	cellular_component	7	TRINITY_DN101199_c4_g4;TRINITY_DN104527_c1_g1;TRINITY_DN106276_c0_g1;TRINITY_DN106276_c0_g2;TRINITY_DN108763_c1_g2;TRINITY_DN112163_c0_g2;TRINITY_DN112578_c1_g1;TRINITY_DN112647_c1_g2;TRINITY_DN113012_c0_g1;TRINITY_DN113949_c1_g1;TRINITY_DN114757_c0_g3;TRINITY_DN117287_c0_g1;TRINITY_DN119570_c0_g3;TRINITY_DN121847_c0_g1;TRINITY_DN124299_c2_g2;TRINITY_DN124536_c2_g1;TRINITY_DN124641_c6_g1;TRINITY_…	23	3857	83	25617	0.00215347
GO:0008266	poly(U) RNA binding	molecular_function	9	TRINITY_DN104316_c1_g3;TRINITY_DN108003_c0_g1;TRINITY_DN111089_c0_g4;TRINITY_DN111847_c1_g5;TRINITY_DN115195_c2_g3;TRINITY_DN123640_c1_g1;TRINITY_DN88071_c0_g3;TRINITY_DN97133_c0_g1;TRINITY_DN98237_c1_g1;TRINITY_DN99724_c0_g5	10	3857	25	25617	0.00219213
GO:0015969	guanosine tetraphosphate metabolic process	biological_process	11	TRINITY_DN104075_c0_g2;TRINITY_DN114440_c0_g1;TRINITY_DN117171_c0_g1;TRINITY_DN118586_c1_g1;TRINITY_DN122360_c1_g1;TRINITY_DN123933_c1_g2;TRINITY_DN124730_c10_g2	7	3857	14	25617	0.00225035
GO:0000481	maturation of 5S rRNA	biological_process	12	TRINITY_DN122548_c1_g1;TRINITY_DN122548_c2_g1;TRINITY_DN122548_c2_g5;TRINITY_DN86610_c0_g1	4	3857	5	25617	0.00225732
GO:1990481	mRNA pseudouridine synthesis	biological_process	11	TRINITY_DN104558_c0_g1;TRINITY_DN110736_c0_g1;TRINITY_DN113040_c2_g4;TRINITY_DN122751_c1_g2	4	3857	5	25617	0.00225732
GO:1903288	positive regulation of potassium ion import	biological_process	12	TRINITY_DN105276_c0_g1;TRINITY_DN115810_c2_g1;TRINITY_DN121159_c2_g1;TRINITY_DN121159_c2_g3	4	3857	5	25617	0.00225732
GO:0010150	leaf senescence	biological_process	6	TRINITY_DN105201_c3_g2;TRINITY_DN105276_c0_g1;TRINITY_DN107017_c0_g1;TRINITY_DN107436_c0_g1;TRINITY_DN108414_c0_g1;TRINITY_DN109489_c2_g3;TRINITY_DN109582_c2_g1;TRINITY_DN110349_c1_g5;TRINITY_DN111696_c1_g1;TRINITY_DN112960_c6_g3;TRINITY_DN113643_c0_g1;TRINITY_DN115810_c2_g1;TRINITY_DN118876_c1_g1;TRINITY_DN119189_c3_g2;TRINITY_DN119985_c3_g1;TRINITY_DN120813_c1_g4;TRINITY_DN120924_c3_g3;TRINITY_…	29	3857	113	25617	0.00226801
GO:0019843	rRNA binding	molecular_function	7	TRINITY_DN100436_c0_g3;TRINITY_DN109854_c0_g2;TRINITY_DN110492_c0_g2;TRINITY_DN110861_c0_g2;TRINITY_DN113424_c0_g1;TRINITY_DN113958_c0_g1;TRINITY_DN114765_c0_g2;TRINITY_DN115584_c0_g1;TRINITY_DN118419_c1_g2;TRINITY_DN120085_c1_g1;TRINITY_DN125275_c6_g1;TRINITY_DN87074_c0_g1;TRINITY_DN93754_c3_g1;TRINITY_DN93799_c0_g2;TRINITY_DN95462_c1_g2;TRINITY_DN98027_c1_g1;TRINITY_DN98235_c1_g2;TRINITY_DN9851…	18	3857	60	25617	0.00244638
GO:0015979	photosynthesis	biological_process	5	TRINITY_DN100429_c1_g2;TRINITY_DN102292_c2_g2;TRINITY_DN103327_c1_g1;TRINITY_DN106894_c2_g1;TRINITY_DN109118_c0_g1;TRINITY_DN110530_c0_g1;TRINITY_DN111495_c2_g3;TRINITY_DN111882_c0_g2;TRINITY_DN111940_c0_g1;TRINITY_DN111940_c0_g3;TRINITY_DN112260_c1_g1;TRINITY_DN112260_c1_g3;TRINITY_DN112663_c0_g2;TRINITY_DN112960_c6_g3;TRINITY_DN114663_c1_g2;TRINITY_DN114898_c1_g2;TRINITY_DN115898_c1_g1;TRINITY_…	30	3857	119	25617	0.00258331
GO:0009793	embryo development ending in seed dormancy	biological_process	5	TRINITY_DN100155_c0_g1;TRINITY_DN100954_c1_g1;TRINITY_DN101332_c0_g4;TRINITY_DN103342_c0_g1;TRINITY_DN104805_c0_g5;TRINITY_DN105055_c6_g2;TRINITY_DN106049_c0_g1;TRINITY_DN106914_c0_g1;TRINITY_DN107206_c0_g2;TRINITY_DN107681_c1_g1;TRINITY_DN107744_c2_g1;TRINITY_DN108375_c0_g3;TRINITY_DN109580_c1_g1;TRINITY_DN109684_c1_g5;TRINITY_DN109854_c0_g2;TRINITY_DN110155_c1_g1;TRINITY_DN110349_c1_g5;TRINITY_…	83	3857	410	25617	0.00262284
GO:0000380	alternative mRNA splicing, via spliceosome	biological_process	14	TRINITY_DN101261_c2_g1;TRINITY_DN104655_c1_g1;TRINITY_DN113567_c0_g1;TRINITY_DN119451_c0_g1;TRINITY_DN94570_c1_g3;TRINITY_DN99861_c0_g1	6	3857	11	25617	0.00270349
GO:0010310	regulation of hydrogen peroxide metabolic process	biological_process	8	TRINITY_DN102442_c1_g1;TRINITY_DN108414_c0_g1;TRINITY_DN111421_c1_g1;TRINITY_DN114159_c1_g1;TRINITY_DN114159_c1_g2;TRINITY_DN121291_c1_g1;TRINITY_DN122914_c1_g4;TRINITY_DN98654_c2_g1	8	3857	18	25617	0.00277606
GO:0043078	polar nucleus	cellular_component	8	TRINITY_DN109559_c1_g1;TRINITY_DN112564_c2_g2;TRINITY_DN113173_c0_g3;TRINITY_DN124518_c1_g1;TRINITY_DN92978_c0_g7	5	3857	8	25617	0.00289823
GO:0045732	positive regulation of protein catabolic process	biological_process	8	TRINITY_DN113497_c1_g4;TRINITY_DN113497_c1_g5;TRINITY_DN117976_c0_g5;TRINITY_DN95490_c2_g1;TRINITY_DN99346_c0_g2	5	3857	8	25617	0.00289823
GO:0004176	ATP-dependent peptidase activity	molecular_function	11	TRINITY_DN100034_c3_g2;TRINITY_DN102888_c0_g4;TRINITY_DN104313_c0_g1;TRINITY_DN104553_c1_g2;TRINITY_DN107770_c2_g1;TRINITY_DN117816_c1_g1;TRINITY_DN118089_c0_g1;TRINITY_DN119387_c1_g2;TRINITY_DN120664_c1_g1;TRINITY_DN122205_c0_g1;TRINITY_DN123711_c2_g1;TRINITY_DN123711_c2_g5;TRINITY_DN124743_c1_g1;TRINITY_DN125140_c4_g3;TRINITY_DN92114_c0_g1;TRINITY_DN94519_c2_g2;TRINITY_DN95846_c0_g1;TRINITY_DN9…	20	3857	71	25617	0.00330197
GO:0080185	effector dependent induction by symbiont of host immune response	biological_process	11	TRINITY_DN108505_c2_g1;TRINITY_DN108505_c2_g3;TRINITY_DN91506_c0_g2	3	3857	3	25617	0.00341096
GO:0009650	UV protection	biological_process	8	TRINITY_DN112519_c2_g1;TRINITY_DN118690_c0_g1;TRINITY_DN94578_c0_g1	3	3857	3	25617	0.00341096
GO:1990269	RNA polymerase II C-terminal domain phosphoserine binding	molecular_function	8	TRINITY_DN106360_c0_g2;TRINITY_DN123904_c2_g1;TRINITY_DN99303_c0_g2	3	3857	3	25617	0.00341096
GO:0098572	stromal side of plastid thylakoid membrane	cellular_component	7	TRINITY_DN103222_c0_g2;TRINITY_DN116013_c0_g1;TRINITY_DN116013_c0_g2	3	3857	3	25617	0.00341096
GO:0016435	rRNA (guanine) methyltransferase activity	molecular_function	9	TRINITY_DN112483_c2_g1;TRINITY_DN122558_c1_g2;TRINITY_DN97445_c1_g1	3	3857	3	25617	0.00341096
GO:0009927	histidine phosphotransfer kinase activity	molecular_function	8	TRINITY_DN101222_c0_g1;TRINITY_DN101257_c1_g1;TRINITY_DN109576_c3_g2	3	3857	3	25617	0.00341096
GO:0009706	chloroplast inner membrane	cellular_component	7	TRINITY_DN100034_c3_g2;TRINITY_DN102579_c0_g1;TRINITY_DN105169_c0_g1;TRINITY_DN106848_c0_g2;TRINITY_DN108442_c0_g2;TRINITY_DN109127_c1_g1;TRINITY_DN110448_c1_g1;TRINITY_DN110925_c2_g1;TRINITY_DN111509_c2_g1;TRINITY_DN113882_c0_g1;TRINITY_DN114697_c0_g1;TRINITY_DN114898_c1_g2;TRINITY_DN116281_c1_g1;TRINITY_DN116281_c1_g4;TRINITY_DN117707_c0_g2;TRINITY_DN117994_c2_g1;TRINITY_DN118246_c0_g2;TRINITY_…	27	3857	106	25617	0.00352424
GO:0032968	positive regulation of transcription elongation from RNA polymerase II promoter	biological_process	11	TRINITY_DN100731_c0_g1;TRINITY_DN100731_c0_g2;TRINITY_DN102159_c0_g3;TRINITY_DN119777_c1_g1;TRINITY_DN119777_c1_g3;TRINITY_DN97801_c1_g2;TRINITY_DN99303_c0_g2	7	3857	15	25617	0.00367434
GO:0009911	positive regulation of flower development	biological_process	9	TRINITY_DN100731_c0_g1;TRINITY_DN100731_c0_g2;TRINITY_DN105038_c0_g2;TRINITY_DN105276_c0_g1;TRINITY_DN108240_c1_g5;TRINITY_DN115810_c2_g1;TRINITY_DN117654_c0_g1;TRINITY_DN119685_c1_g3;TRINITY_DN121159_c2_g1;TRINITY_DN121159_c2_g3;TRINITY_DN122933_c1_g3;TRINITY_DN90341_c3_g4	12	3857	35	25617	0.0037686
GO:0009773	photosynthetic electron transport in photosystem I	biological_process	8	TRINITY_DN103327_c1_g1;TRINITY_DN106894_c2_g1;TRINITY_DN111940_c0_g1;TRINITY_DN111940_c0_g3;TRINITY_DN114663_c1_g2;TRINITY_DN123882_c1_g3;TRINITY_DN97581_c2_g1;TRINITY_DN99524_c0_g3	8	3857	19	25617	0.00416796
GO:0008270	zinc ion binding	molecular_function	8	TRINITY_DN100807_c0_g1;TRINITY_DN101005_c0_g3;TRINITY_DN101281_c0_g1;TRINITY_DN101310_c1_g1;TRINITY_DN101566_c1_g5;TRINITY_DN103107_c0_g1;TRINITY_DN103191_c0_g1;TRINITY_DN103932_c0_g1;TRINITY_DN103980_c0_g2;TRINITY_DN104005_c3_g1;TRINITY_DN104156_c0_g2;TRINITY_DN104465_c2_g4;TRINITY_DN104526_c0_g1;TRINITY_DN104931_c6_g1;TRINITY_DN106403_c0_g2;TRINITY_DN106440_c1_g2;TRINITY_DN106497_c1_g1;TRINITY_…	132	3857	709	25617	0.00503904
GO:0015995	chlorophyll biosynthetic process	biological_process	9	TRINITY_DN104718_c1_g1;TRINITY_DN111509_c2_g1;TRINITY_DN114074_c0_g1;TRINITY_DN114562_c0_g1;TRINITY_DN114898_c1_g2;TRINITY_DN116281_c1_g1;TRINITY_DN116281_c1_g4;TRINITY_DN120419_c0_g1;TRINITY_DN121043_c0_g3;TRINITY_DN122569_c0_g2;TRINITY_DN122797_c1_g2;TRINITY_DN124077_c2_g1;TRINITY_DN124287_c4_g1;TRINITY_DN91142_c0_g1;TRINITY_DN92607_c0_g1	15	3857	50	25617	0.00543341
GO:0009532	plastid stroma	cellular_component	7	TRINITY_DN100034_c3_g2;TRINITY_DN104280_c1_g1;TRINITY_DN104920_c2_g1;TRINITY_DN109963_c1_g1;TRINITY_DN118878_c1_g1;TRINITY_DN120833_c0_g2;TRINITY_DN120833_c1_g1;TRINITY_DN121128_c0_g7;TRINITY_DN123286_c0_g1;TRINITY_DN123711_c2_g1;TRINITY_DN123711_c2_g5;TRINITY_DN81848_c0_g1;TRINITY_DN95846_c0_g1;TRINITY_DN96905_c1_g2;TRINITY_DN96986_c1_g2	15	3857	50	25617	0.00543341
GO:0008893	guanosine-3',5'-bis(diphosphate) 3'-diphosphatase activity	molecular_function	8	TRINITY_DN104075_c0_g2;TRINITY_DN114440_c0_g1;TRINITY_DN117171_c0_g1;TRINITY_DN118586_c1_g1;TRINITY_DN122360_c1_g1;TRINITY_DN123933_c1_g2;TRINITY_DN124730_c10_g2	7	3857	16	25617	0.00569075
GO:0004372	glycine hydroxymethyltransferase activity	molecular_function	7	TRINITY_DN104316_c1_g3;TRINITY_DN115195_c2_g3;TRINITY_DN116316_c0_g1;TRINITY_DN116316_c1_g6;TRINITY_DN118508_c0_g1;TRINITY_DN123640_c1_g1;TRINITY_DN88071_c0_g3	7	3857	16	25617	0.00569075
GO:0006544	glycine metabolic process	biological_process	11	TRINITY_DN104316_c1_g3;TRINITY_DN115195_c2_g3;TRINITY_DN116316_c0_g1;TRINITY_DN116316_c1_g6;TRINITY_DN118508_c0_g1;TRINITY_DN123640_c1_g1;TRINITY_DN88071_c0_g3	7	3857	16	25617	0.00569075
GO:0030628	pre-mRNA 3'-splice site binding	molecular_function	8	TRINITY_DN105680_c0_g2;TRINITY_DN116456_c0_g1;TRINITY_DN117518_c0_g2;TRINITY_DN120747_c0_g3;TRINITY_DN91592_c0_g1	5	3857	9	25617	0.00571396
GO:0010618	aerenchyma formation	biological_process	5	TRINITY_DN102442_c1_g1;TRINITY_DN108414_c0_g1;TRINITY_DN111421_c1_g1;TRINITY_DN121291_c1_g1;TRINITY_DN98654_c2_g1	5	3857	9	25617	0.00571396
GO:0016602	CCAAT-binding factor complex	cellular_component	7	TRINITY_DN103223_c6_g2;TRINITY_DN109336_c1_g1;TRINITY_DN111093_c1_g1;TRINITY_DN120189_c1_g1;TRINITY_DN120189_c1_g2	5	3857	9	25617	0.00571396
GO:0010227	floral organ abscission	biological_process	5	TRINITY_DN105276_c0_g1;TRINITY_DN109580_c1_g1;TRINITY_DN114383_c1_g4;TRINITY_DN115810_c2_g1;TRINITY_DN115825_c1_g1;TRINITY_DN116388_c0_g2;TRINITY_DN121159_c2_g1;TRINITY_DN121159_c2_g3;TRINITY_DN121192_c0_g2	9	3857	24	25617	0.00599981
GO:0007623	circadian rhythm	biological_process	4	TRINITY_DN101261_c2_g1;TRINITY_DN104316_c1_g3;TRINITY_DN104655_c1_g1;TRINITY_DN109153_c0_g3;TRINITY_DN109374_c1_g2;TRINITY_DN109955_c0_g1;TRINITY_DN112363_c0_g1;TRINITY_DN114159_c1_g1;TRINITY_DN114159_c1_g2;TRINITY_DN115195_c2_g3;TRINITY_DN116013_c0_g1;TRINITY_DN116013_c0_g2;TRINITY_DN117549_c5_g2;TRINITY_DN118508_c0_g1;TRINITY_DN119458_c2_g4;TRINITY_DN121349_c0_g1;TRINITY_DN122914_c1_g4;TRINITY_…	25	3857	100	25617	0.0062836
GO:0004806	triglyceride lipase activity	molecular_function	7	TRINITY_DN102442_c1_g1;TRINITY_DN108414_c0_g1;TRINITY_DN111421_c1_g1;TRINITY_DN111421_c1_g2;TRINITY_DN112519_c2_g1;TRINITY_DN118690_c0_g1;TRINITY_DN120753_c1_g1;TRINITY_DN121291_c1_g1;TRINITY_DN122679_c1_g1;TRINITY_DN123934_c1_g1;TRINITY_DN124838_c5_g1;TRINITY_DN94578_c0_g1;TRINITY_DN96387_c0_g1;TRINITY_DN98544_c0_g2;TRINITY_DN98654_c2_g1	15	3857	51	25617	0.00664642
GO:0009735	response to cytokinin	biological_process	6	TRINITY_DN100034_c3_g2;TRINITY_DN100429_c1_g2;TRINITY_DN100659_c1_g2;TRINITY_DN101261_c2_g1;TRINITY_DN102228_c0_g2;TRINITY_DN103107_c0_g1;TRINITY_DN104324_c3_g1;TRINITY_DN104655_c1_g1;TRINITY_DN105545_c0_g1;TRINITY_DN106352_c0_g3;TRINITY_DN107360_c0_g1;TRINITY_DN107516_c0_g3;TRINITY_DN108160_c1_g2;TRINITY_DN108297_c1_g2;TRINITY_DN109374_c1_g2;TRINITY_DN110421_c5_g1;TRINITY_DN111882_c0_g2;TRINITY_…	43	3857	198	25617	0.00758175
GO:0009294	DNA mediated transformation	biological_process	6	TRINITY_DN103693_c2_g1;TRINITY_DN108017_c2_g1;TRINITY_DN113042_c3_g1;TRINITY_DN114539_c1_g2;TRINITY_DN115881_c0_g1;TRINITY_DN117242_c0_g1;TRINITY_DN117600_c0_g1;TRINITY_DN120458_c1_g1;TRINITY_DN121961_c0_g1;TRINITY_DN123184_c1_g1;TRINITY_DN96299_c2_g1;TRINITY_DN98712_c0_g1	12	3857	38	25617	0.00792252
GO:0000304	response to singlet oxygen	biological_process	7	TRINITY_DN102442_c1_g1;TRINITY_DN111421_c1_g1;TRINITY_DN116173_c1_g1;TRINITY_DN119130_c0_g3;TRINITY_DN120601_c1_g2;TRINITY_DN121291_c1_g1;TRINITY_DN98654_c2_g1	7	3857	17	25617	0.00843183
GO:0009508	plastid chromosome	cellular_component	8	TRINITY_DN114173_c0_g2;TRINITY_DN114524_c0_g2;TRINITY_DN116013_c0_g1;TRINITY_DN116013_c0_g2;TRINITY_DN122009_c1_g1;TRINITY_DN122544_c1_g1;TRINITY_DN96881_c1_g6	7	3857	17	25617	0.00843183
GO:0010942	positive regulation of cell death	biological_process	7	TRINITY_DN102442_c1_g1;TRINITY_DN103587_c0_g1;TRINITY_DN108414_c0_g1;TRINITY_DN111421_c1_g1;TRINITY_DN115089_c0_g2;TRINITY_DN121291_c1_g1;TRINITY_DN98654_c2_g1	7	3857	17	25617	0.00843183
GO:0071004	U2-type prespliceosome	cellular_component	8	TRINITY_DN102733_c1_g2;TRINITY_DN105680_c0_g2;TRINITY_DN114084_c1_g1;TRINITY_DN114084_c1_g2;TRINITY_DN114313_c0_g3;TRINITY_DN116334_c1_g1;TRINITY_DN117518_c0_g2;TRINITY_DN124299_c2_g2;TRINITY_DN125022_c3_g1;TRINITY_DN91592_c0_g1;TRINITY_DN98326_c0_g1	11	3857	34	25617	0.00888503
GO:0000209	protein polyubiquitination	biological_process	12	TRINITY_DN104159_c0_g1;TRINITY_DN106194_c0_g1;TRINITY_DN109449_c0_g2;TRINITY_DN111436_c0_g1;TRINITY_DN111532_c4_g1;TRINITY_DN112893_c1_g1;TRINITY_DN112981_c0_g1;TRINITY_DN117373_c0_g1;TRINITY_DN117513_c0_g1;TRINITY_DN117620_c3_g1;TRINITY_DN118501_c0_g3;TRINITY_DN118511_c2_g2;TRINITY_DN118638_c1_g1;TRINITY_DN121267_c0_g2;TRINITY_DN124017_c2_g1;TRINITY_DN89146_c0_g2;TRINITY_DN91852_c1_g3;TRINITY_DN…	23	3857	93	25617	0.00975044
GO:0043565	sequence-specific DNA binding	molecular_function	7	TRINITY_DN100374_c0_g1;TRINITY_DN100512_c0_g1;TRINITY_DN100620_c0_g1;TRINITY_DN100652_c0_g1;TRINITY_DN100813_c0_g1;TRINITY_DN101261_c1_g1;TRINITY_DN101877_c3_g1;TRINITY_DN102355_c0_g2;TRINITY_DN102639_c1_g1;TRINITY_DN103276_c0_g1;TRINITY_DN103693_c2_g1;TRINITY_DN104042_c0_g2;TRINITY_DN104266_c0_g1;TRINITY_DN104437_c4_g1;TRINITY_DN104475_c1_g4;TRINITY_DN104696_c0_g1;TRINITY_DN104908_c0_g4;TRINITY_…	101	3857	538	25617	0.0101975
GO:0050821	protein stabilization	biological_process	6	TRINITY_DN100308_c0_g1;TRINITY_DN103327_c1_g1;TRINITY_DN111669_c0_g2;TRINITY_DN111835_c1_g3;TRINITY_DN118461_c1_g5;TRINITY_DN94005_c0_g1	6	3857	14	25617	0.0117176
GO:0016444	somatic cell DNA recombination	biological_process	9	TRINITY_DN112104_c0_g4;TRINITY_DN113042_c3_g1;TRINITY_DN115469_c2_g1;TRINITY_DN120626_c2_g1;TRINITY_DN95051_c4_g4;TRINITY_DN98712_c0_g1	6	3857	14	25617	0.0117176
GO:0004089	carbonate dehydratase activity	molecular_function	7	TRINITY_DN103620_c0_g1;TRINITY_DN108767_c0_g2;TRINITY_DN112260_c1_g1;TRINITY_DN112260_c1_g3;TRINITY_DN113979_c1_g1;TRINITY_DN92737_c0_g1	6	3857	14	25617	0.0117176
GO:0031897	Tic complex	cellular_component	8	TRINITY_DN100034_c3_g2;TRINITY_DN119449_c0_g1;TRINITY_DN123711_c2_g1;TRINITY_DN123711_c2_g5;TRINITY_DN95846_c0_g1;TRINITY_DN96905_c1_g2	6	3857	14	25617	0.0117176
GO:0006563	L-serine metabolic process	biological_process	11	TRINITY_DN104316_c1_g3;TRINITY_DN115195_c2_g3;TRINITY_DN116316_c0_g1;TRINITY_DN116316_c1_g6;TRINITY_DN118508_c0_g1;TRINITY_DN123640_c1_g1;TRINITY_DN88071_c0_g3	7	3857	18	25617	0.012031
GO:0071345	cellular response to cytokine stimulus	biological_process	7	TRINITY_DN103952_c1_g1;TRINITY_DN107093_c2_g2;TRINITY_DN108544_c0_g1	3	3857	4	25617	0.0121042
GO:0004014	adenosylmethionine decarboxylase activity	molecular_function	7	TRINITY_DN111289_c0_g1;TRINITY_DN114744_c0_g1;TRINITY_DN116164_c0_g3	3	3857	4	25617	0.0121042
GO:0000910	cytokinesis	biological_process	5	TRINITY_DN106755_c0_g1;TRINITY_DN106755_c1_g1;TRINITY_DN97933_c0_g1	3	3857	4	25617	0.0121042
GO:0004750	ribulose-phosphate 3-epimerase activity	molecular_function	7	TRINITY_DN112087_c2_g3;TRINITY_DN114462_c2_g2;TRINITY_DN95261_c0_g1	3	3857	4	25617	0.0121042
GO:0007020	microtubule nucleation	biological_process	8	TRINITY_DN106755_c0_g1;TRINITY_DN94595_c0_g2;TRINITY_DN97933_c0_g1	3	3857	4	25617	0.0121042
GO:0000495	box H/ACA snoRNA 3'-end processing	biological_process	13	TRINITY_DN110736_c0_g1;TRINITY_DN113040_c2_g4;TRINITY_DN122751_c1_g2	3	3857	4	25617	0.0121042
GO:0006597	spermine biosynthetic process	biological_process	11	TRINITY_DN111289_c0_g1;TRINITY_DN114744_c0_g1;TRINITY_DN116164_c0_g3	3	3857	4	25617	0.0121042
GO:0009722	detection of cytokinin stimulus	biological_process	7	TRINITY_DN103952_c1_g1;TRINITY_DN107093_c2_g2;TRINITY_DN108544_c0_g1	3	3857	4	25617	0.0121042
GO:0060149	negative regulation of posttranscriptional gene silencing	biological_process	10	TRINITY_DN117145_c0_g1;TRINITY_DN117347_c0_g2;TRINITY_DN97643_c0_g3	3	3857	4	25617	0.0121042
GO:0019323	pentose catabolic process	biological_process	8	TRINITY_DN112087_c2_g3;TRINITY_DN114462_c2_g2;TRINITY_DN95261_c0_g1	3	3857	4	25617	0.0121042
GO:0008295	spermidine biosynthetic process	biological_process	11	TRINITY_DN111289_c0_g1;TRINITY_DN114744_c0_g1;TRINITY_DN116164_c0_g3	3	3857	4	25617	0.0121042
GO:0000389	mRNA 3'-splice site recognition	biological_process	10	TRINITY_DN106276_c0_g1;TRINITY_DN106276_c0_g2;TRINITY_DN98326_c0_g1	3	3857	4	25617	0.0121042
GO:0009052	pentose-phosphate shunt, non-oxidative branch	biological_process	6	TRINITY_DN110421_c5_g1;TRINITY_DN112087_c2_g3;TRINITY_DN114462_c2_g2;TRINITY_DN95261_c0_g1	4	3857	7	25617	0.0122556
GO:0070125	mitochondrial translational elongation	biological_process	9	TRINITY_DN110270_c0_g3;TRINITY_DN117311_c0_g1;TRINITY_DN117311_c0_g2;TRINITY_DN95146_c0_g1	4	3857	7	25617	0.0122556
GO:0004618	phosphoglycerate kinase activity	molecular_function	7	TRINITY_DN114716_c2_g1;TRINITY_DN122303_c1_g2;TRINITY_DN93088_c0_g2;TRINITY_DN95226_c3_g1	4	3857	7	25617	0.0122556
GO:0010540	basipetal auxin transport	biological_process	9	TRINITY_DN100382_c0_g1;TRINITY_DN109572_c0_g1;TRINITY_DN123112_c0_g1;TRINITY_DN123112_c1_g2	4	3857	7	25617	0.0122556
GO:0010005	cortical microtubule, transverse to long axis	cellular_component	10	TRINITY_DN109584_c2_g1;TRINITY_DN109584_c2_g2;TRINITY_DN123207_c1_g4;TRINITY_DN94340_c4_g2	4	3857	7	25617	0.0122556
GO:0005681	spliceosomal complex	cellular_component	6	TRINITY_DN108008_c3_g2;TRINITY_DN108547_c0_g4;TRINITY_DN109749_c0_g4;TRINITY_DN110953_c0_g1;TRINITY_DN113725_c1_g1;TRINITY_DN115706_c1_g2;TRINITY_DN116194_c0_g1;TRINITY_DN116194_c0_g2;TRINITY_DN116456_c0_g1;TRINITY_DN118151_c0_g1;TRINITY_DN118644_c1_g2;TRINITY_DN118722_c1_g1;TRINITY_DN120747_c0_g3;TRINITY_DN121590_c1_g2;TRINITY_DN122780_c2_g1;TRINITY_DN124139_c5_g1;TRINITY_DN124803_c4_g5;TRINITY_…	24	3857	100	25617	0.0122685
GO:0009651	response to salt stress	biological_process	6	TRINITY_DN101261_c2_g1;TRINITY_DN101767_c1_g1;TRINITY_DN102639_c1_g1;TRINITY_DN103031_c0_g3;TRINITY_DN103031_c0_g4;TRINITY_DN103107_c0_g1;TRINITY_DN103282_c1_g3;TRINITY_DN103342_c0_g1;TRINITY_DN104417_c0_g1;TRINITY_DN104655_c1_g1;TRINITY_DN105038_c0_g2;TRINITY_DN105959_c2_g6;TRINITY_DN107416_c1_g1;TRINITY_DN107510_c1_g2;TRINITY_DN107597_c2_g1;TRINITY_DN107900_c1_g1;TRINITY_DN108191_c3_g2;TRINITY_…	94	3857	502	25617	0.0136728
GO:0000462	maturation of SSU-rRNA from tricistronic rRNA transcript (SSU-rRNA, 5.8S rRNA, LSU-rRNA)	biological_process	13	TRINITY_DN101993_c0_g3;TRINITY_DN107230_c0_g1;TRINITY_DN108768_c1_g1;TRINITY_DN108768_c1_g3;TRINITY_DN109178_c2_g1;TRINITY_DN109178_c2_g2;TRINITY_DN109178_c2_g5;TRINITY_DN109728_c3_g3;TRINITY_DN110492_c0_g2;TRINITY_DN111069_c1_g1;TRINITY_DN113633_c2_g5;TRINITY_DN116502_c3_g2;TRINITY_DN121102_c1_g1;TRINITY_DN121102_c1_g2;TRINITY_DN121145_c1_g2;TRINITY_DN123979_c5_g2;TRINITY_DN89555_c1_g1;TRINITY_D…	19	3857	75	25617	0.0137635
GO:0005795	Golgi stack	cellular_component	7	TRINITY_DN101463_c0_g1;TRINITY_DN103999_c2_g1;TRINITY_DN110261_c1_g5;TRINITY_DN111574_c1_g2;TRINITY_DN114609_c0_g1;TRINITY_DN114771_c2_g1;TRINITY_DN121900_c1_g2;TRINITY_DN123561_c3_g3;TRINITY_DN96699_c1_g1	9	3857	27	25617	0.0141021
GO:0005769	early endosome	cellular_component	8	TRINITY_DN102228_c0_g2;TRINITY_DN107436_c0_g1;TRINITY_DN111574_c1_g2;TRINITY_DN118689_c0_g1;TRINITY_DN119783_c3_g2;TRINITY_DN123797_c1_g1;TRINITY_DN124666_c4_g2;TRINITY_DN98368_c2_g1	8	3857	23	25617	0.0154942
GO:0000387	spliceosomal snRNP assembly	biological_process	9	TRINITY_DN113277_c3_g2;TRINITY_DN119451_c0_g1;TRINITY_DN122548_c1_g1;TRINITY_DN122548_c2_g1;TRINITY_DN122548_c2_g5;TRINITY_DN86610_c0_g1;TRINITY_DN88458_c0_g3;TRINITY_DN99001_c0_g1	8	3857	23	25617	0.0154942
GO:0042752	regulation of circadian rhythm	biological_process	5	TRINITY_DN108723_c0_g3;TRINITY_DN112408_c2_g3;TRINITY_DN112647_c1_g2;TRINITY_DN114159_c1_g1;TRINITY_DN114159_c1_g2;TRINITY_DN115997_c1_g1;TRINITY_DN122034_c0_g1;TRINITY_DN122914_c1_g4;TRINITY_DN122999_c0_g2;TRINITY_DN124416_c4_g4;TRINITY_DN124729_c2_g1;TRINITY_DN88414_c0_g2;TRINITY_DN90948_c3_g2	13	3857	46	25617	0.0156814
GO:0018107	peptidyl-threonine phosphorylation	biological_process	10	TRINITY_DN101297_c1_g3;TRINITY_DN103730_c1_g3;TRINITY_DN104446_c1_g1;TRINITY_DN109572_c0_g1;TRINITY_DN111434_c0_g1;TRINITY_DN113919_c1_g3;TRINITY_DN117298_c0_g1;TRINITY_DN119931_c0_g1;TRINITY_DN123112_c0_g1;TRINITY_DN123112_c1_g2	10	3857	32	25617	0.0159669
GO:1900426	positive regulation of defense response to bacterium	biological_process	8	TRINITY_DN108414_c0_g1;TRINITY_DN108505_c2_g1;TRINITY_DN108505_c2_g3;TRINITY_DN114159_c1_g1;TRINITY_DN114159_c1_g2;TRINITY_DN118082_c0_g1;TRINITY_DN122914_c1_g4;TRINITY_DN91506_c0_g2;TRINITY_DN96387_c0_g1;TRINITY_DN98544_c0_g2	10	3857	32	25617	0.0159669
GO:0002213	defense response to insect	biological_process	7	TRINITY_DN108414_c0_g1;TRINITY_DN108813_c0_g2;TRINITY_DN119311_c1_g2;TRINITY_DN122482_c0_g2;TRINITY_DN91254_c0_g1	5	3857	11	25617	0.0161169
GO:0030674	protein binding, bridging	molecular_function	5	TRINITY_DN105525_c0_g2;TRINITY_DN106454_c0_g3;TRINITY_DN116796_c0_g2;TRINITY_DN123954_c1_g1;TRINITY_DN94476_c0_g1	5	3857	11	25617	0.0161169
GO:0009001	serine O-acetyltransferase activity	molecular_function	9	TRINITY_DN103932_c0_g1;TRINITY_DN114897_c0_g3;TRINITY_DN121717_c1_g1;TRINITY_DN123133_c3_g2;TRINITY_DN96997_c0_g4	5	3857	11	25617	0.0161169
GO:0045292	mRNA cis splicing, via spliceosome	biological_process	14	TRINITY_DN115011_c0_g1;TRINITY_DN122548_c1_g1;TRINITY_DN122548_c2_g1;TRINITY_DN122548_c2_g5;TRINITY_DN86610_c0_g1	5	3857	11	25617	0.0161169
GO:0089701	U2AF	cellular_component	4	TRINITY_DN105680_c0_g2;TRINITY_DN116456_c0_g1;TRINITY_DN117518_c0_g2;TRINITY_DN120747_c0_g3;TRINITY_DN91592_c0_g1	5	3857	11	25617	0.0161169
GO:0030060	L-malate dehydrogenase activity	molecular_function	7	TRINITY_DN107914_c1_g2;TRINITY_DN108163_c0_g1;TRINITY_DN113243_c0_g3;TRINITY_DN115078_c0_g1;TRINITY_DN116449_c0_g2	5	3857	11	25617	0.0161169
GO:0102229	amylopectin maltohydrolase activity	molecular_function	7	TRINITY_DN110724_c0_g1;TRINITY_DN111698_c0_g2;TRINITY_DN121693_c0_g1;TRINITY_DN121693_c0_g2;TRINITY_DN123042_c2_g4;TRINITY_DN92515_c2_g1	6	3857	15	25617	0.0170797
GO:0019760	glucosinolate metabolic process	biological_process	8	TRINITY_DN100620_c0_g1;TRINITY_DN102639_c1_g1;TRINITY_DN104475_c1_g4;TRINITY_DN105575_c3_g2;TRINITY_DN105786_c4_g3;TRINITY_DN110949_c0_g1;TRINITY_DN112423_c0_g2;TRINITY_DN113163_c3_g2;TRINITY_DN117926_c0_g1;TRINITY_DN90102_c0_g1;TRINITY_DN95936_c0_g1	11	3857	37	25617	0.0173012
GO:0042273	ribosomal large subunit biogenesis	biological_process	6	TRINITY_DN101329_c2_g1;TRINITY_DN104098_c0_g1;TRINITY_DN104394_c0_g2;TRINITY_DN112976_c2_g1;TRINITY_DN118502_c1_g1;TRINITY_DN120177_c0_g1;TRINITY_DN122618_c2_g1;TRINITY_DN91377_c2_g7;TRINITY_DN98019_c0_g1	9	3857	28	25617	0.0180674
GO:0043130	ubiquitin binding	molecular_function	6	TRINITY_DN106752_c1_g1;TRINITY_DN108158_c1_g1;TRINITY_DN111574_c1_g2;TRINITY_DN111949_c1_g1;TRINITY_DN112956_c1_g5;TRINITY_DN113237_c0_g1;TRINITY_DN114435_c1_g2;TRINITY_DN114530_c0_g1;TRINITY_DN114771_c2_g1;TRINITY_DN119782_c1_g1;TRINITY_DN123349_c1_g1;TRINITY_DN123844_c3_g1;TRINITY_DN91485_c1_g2;TRINITY_DN95911_c2_g1;TRINITY_DN98105_c0_g1;TRINITY_DN99423_c2_g2	16	3857	62	25617	0.0190475
GO:0016874	ligase activity	molecular_function	4	TRINITY_DN102787_c0_g1;TRINITY_DN105384_c0_g2;TRINITY_DN106648_c0_g1;TRINITY_DN107936_c1_g1;TRINITY_DN108337_c0_g1;TRINITY_DN108339_c2_g5;TRINITY_DN108629_c0_g1;TRINITY_DN111205_c2_g2;TRINITY_DN111571_c0_g1;TRINITY_DN112286_c1_g2;TRINITY_DN112485_c1_g1;TRINITY_DN115491_c0_g4;TRINITY_DN115838_c1_g1;TRINITY_DN118252_c3_g2;TRINITY_DN118811_c0_g1;TRINITY_DN121867_c0_g5;TRINITY_DN122193_c0_g2;TRINITY_…	21	3857	88	25617	0.0194685
GO:0070847	core mediator complex	cellular_component	7	TRINITY_DN104934_c0_g1;TRINITY_DN107972_c0_g1;TRINITY_DN114836_c1_g1;TRINITY_DN124828_c6_g1	4	3857	8	25617	0.021613
GO:0016615	malate dehydrogenase activity	molecular_function	6	TRINITY_DN107914_c1_g2;TRINITY_DN108163_c0_g1;TRINITY_DN113243_c0_g3;TRINITY_DN116449_c0_g2	4	3857	8	25617	0.021613
GO:0071470	cellular response to osmotic stress	biological_process	6	TRINITY_DN108417_c1_g2;TRINITY_DN116864_c4_g1;TRINITY_DN125282_c9_g5;TRINITY_DN92389_c0_g1	4	3857	8	25617	0.021613
GO:0010929	positive regulation of auxin mediated signaling pathway	biological_process	9	TRINITY_DN112423_c0_g2;TRINITY_DN117926_c0_g1;TRINITY_DN83315_c0_g1;TRINITY_DN95936_c0_g1	4	3857	8	25617	0.021613
GO:0010114	response to red light	biological_process	8	TRINITY_DN100659_c1_g2;TRINITY_DN102292_c2_g2;TRINITY_DN111835_c1_g3;TRINITY_DN112408_c2_g3;TRINITY_DN114159_c1_g1;TRINITY_DN114159_c1_g2;TRINITY_DN117654_c0_g1;TRINITY_DN118170_c0_g2;TRINITY_DN121114_c0_g1;TRINITY_DN122914_c1_g4;TRINITY_DN122957_c3_g2;TRINITY_DN88414_c0_g2	12	3857	43	25617	0.0218847
GO:0035999	tetrahydrofolate interconversion	biological_process	6	TRINITY_DN104316_c1_g3;TRINITY_DN115195_c2_g3;TRINITY_DN116316_c0_g1;TRINITY_DN116316_c1_g6;TRINITY_DN118508_c0_g1;TRINITY_DN123640_c1_g1;TRINITY_DN88071_c0_g3	7	3857	20	25617	0.0223132
GO:0007005	mitochondrion organization	biological_process	6	TRINITY_DN100484_c1_g4;TRINITY_DN100807_c0_g1;TRINITY_DN104005_c3_g1;TRINITY_DN109044_c0_g1;TRINITY_DN109626_c0_g3;TRINITY_DN109684_c1_g5;TRINITY_DN113696_c0_g3;TRINITY_DN113885_c1_g1;TRINITY_DN114900_c0_g4;TRINITY_DN116733_c0_g1;TRINITY_DN117604_c0_g1;TRINITY_DN124841_c3_g2;TRINITY_DN125043_c6_g2;TRINITY_DN125057_c2_g2;TRINITY_DN90653_c0_g1	15	3857	58	25617	0.0223176
GO:0043295	glutathione binding	molecular_function	6	TRINITY_DN125306_c21_g1;TRINITY_DN99469_c2_g1	2	3857	2	25617	0.0226645
GO:0000126	transcription factor TFIIIB complex	cellular_component	7	TRINITY_DN101740_c0_g3;TRINITY_DN122350_c3_g3	2	3857	2	25617	0.0226645
GO:0010157	response to chlorate	biological_process	6	TRINITY_DN103342_c0_g1;TRINITY_DN111166_c3_g1	2	3857	2	25617	0.0226645
GO:0007040	lysosome organization	biological_process	8	TRINITY_DN105525_c0_g2;TRINITY_DN116796_c0_g2	2	3857	2	25617	0.0226645
GO:0000578	embryonic axis specification	biological_process	6	TRINITY_DN110155_c1_g1;TRINITY_DN114448_c1_g3	2	3857	2	25617	0.0226645
GO:0030941	chloroplast targeting sequence binding	molecular_function	7	TRINITY_DN109578_c2_g2;TRINITY_DN109720_c1_g3	2	3857	2	25617	0.0226645
GO:0080085	signal recognition particle, chloroplast targeting	cellular_component	7	TRINITY_DN111860_c1_g1;TRINITY_DN116222_c0_g1	2	3857	2	25617	0.0226645
GO:1901401	regulation of tetrapyrrole metabolic process	biological_process	7	TRINITY_DN116281_c1_g1;TRINITY_DN116281_c1_g4	2	3857	2	25617	0.0226645
GO:0030691	Noc2p-Noc3p complex	cellular_component	5	TRINITY_DN104098_c0_g1;TRINITY_DN120177_c0_g1	2	3857	2	25617	0.0226645
GO:0004740	pyruvate dehydrogenase (acetyl-transferring) kinase activity	molecular_function	8	TRINITY_DN101257_c1_g1;TRINITY_DN109576_c3_g2	2	3857	2	25617	0.0226645
GO:0048442	sepal development	biological_process	6	TRINITY_DN124769_c1_g2;TRINITY_DN99151_c0_g1	2	3857	2	25617	0.0226645
GO:0002184	cytoplasmic translational termination	biological_process	9	TRINITY_DN117982_c0_g1;TRINITY_DN98424_c0_g1	2	3857	2	25617	0.0226645
GO:0048461	flower structural organization	biological_process	5	TRINITY_DN115825_c1_g1;TRINITY_DN121192_c0_g2	2	3857	2	25617	0.0226645
GO:0047958	glycine:2-oxoglutarate aminotransferase activity	molecular_function	7	TRINITY_DN113711_c2_g1;TRINITY_DN113711_c2_g2	2	3857	2	25617	0.0226645
GO:0006983	ER overload response	biological_process	6	TRINITY_DN120020_c2_g1;TRINITY_DN123316_c2_g1	2	3857	2	25617	0.0226645
GO:0030690	Noc1p-Noc2p complex	cellular_component	5	TRINITY_DN104098_c0_g1;TRINITY_DN120177_c0_g1	2	3857	2	25617	0.0226645
GO:0006383	transcription by RNA polymerase III	biological_process	9	TRINITY_DN101740_c0_g3;TRINITY_DN122350_c3_g3	2	3857	2	25617	0.0226645
GO:0048529	magnesium-protoporphyrin IX monomethyl ester (oxidative) cyclase activity	molecular_function	7	TRINITY_DN116281_c1_g1;TRINITY_DN116281_c1_g4	2	3857	2	25617	0.0226645
GO:0007026	negative regulation of microtubule depolymerization	biological_process	10	TRINITY_DN111669_c0_g2;TRINITY_DN118461_c1_g5	2	3857	2	25617	0.0226645
GO:0016570	histone modification	biological_process	9	TRINITY_DN106360_c0_g2;TRINITY_DN123904_c2_g1	2	3857	2	25617	0.0226645
GO:0032509	endosome transport via multivesicular body sorting pathway	biological_process	8	TRINITY_DN110155_c1_g1;TRINITY_DN114448_c1_g3	2	3857	2	25617	0.0226645
GO:0003937	IMP cyclohydrolase activity	molecular_function	8	TRINITY_DN113626_c0_g1;TRINITY_DN121855_c1_g1	2	3857	2	25617	0.0226645
GO:0002239	response to oomycetes	biological_process	7	TRINITY_DN105588_c0_g1;TRINITY_DN112813_c0_g1	2	3857	2	25617	0.0226645
GO:0042853	L-alanine catabolic process	biological_process	13	TRINITY_DN113711_c2_g1;TRINITY_DN113711_c2_g2	2	3857	2	25617	0.0226645
GO:0040020	regulation of meiotic nuclear division	biological_process	8	TRINITY_DN94340_c4_g2;TRINITY_DN98489_c1_g1	2	3857	2	25617	0.0226645
GO:0004643	phosphoribosylaminoimidazolecarboxamide formyltransferase activity	molecular_function	7	TRINITY_DN113626_c0_g1;TRINITY_DN121855_c1_g1	2	3857	2	25617	0.0226645
GO:0048767	root hair elongation	biological_process	6	TRINITY_DN107741_c0_g1;TRINITY_DN108149_c0_g3;TRINITY_DN112953_c1_g2;TRINITY_DN118425_c5_g2;TRINITY_DN118689_c0_g1;TRINITY_DN119528_c1_g1;TRINITY_DN122062_c1_g1;TRINITY_DN98318_c0_g1;TRINITY_DN98619_c0_g1	9	3857	29	25617	0.0227841
GO:0000463	maturation of LSU-rRNA from tricistronic rRNA transcript (SSU-rRNA, 5.8S rRNA, LSU-rRNA	biological_process	13	TRINITY_DN106856_c0_g5;TRINITY_DN112483_c2_g1;TRINITY_DN114145_c1_g5;TRINITY_DN117972_c0_g3;TRINITY_DN118577_c2_g1;TRINITY_DN122558_c1_g2;TRINITY_DN125233_c12_g1;TRINITY_DN87074_c0_g1;TRINITY_DN99719_c2_g3	9	3857	29	25617	0.0227841
GO:0051085	chaperone cofactor-dependent protein refolding	biological_process	7	TRINITY_DN100484_c1_g4;TRINITY_DN109044_c0_g1;TRINITY_DN124841_c3_g2;TRINITY_DN90653_c0_g1;TRINITY_DN97523_c1_g1;TRINITY_DN98951_c0_g1	6	3857	16	25617	0.0239131
GO:0099402	plant organ development	biological_process	5	TRINITY_DN114159_c1_g1;TRINITY_DN114159_c1_g2;TRINITY_DN122636_c0_g2;TRINITY_DN122914_c1_g4;TRINITY_DN96799_c1_g1	5	3857	12	25617	0.0242566
GO:0050665	hydrogen peroxide biosynthetic process	biological_process	8	TRINITY_DN108191_c3_g2;TRINITY_DN115549_c0_g1;TRINITY_DN118104_c2_g3;TRINITY_DN97655_c1_g1;TRINITY_DN97655_c1_g2	5	3857	12	25617	0.0242566
GO:0008142	oxysterol binding	molecular_function	7	TRINITY_DN101719_c1_g5;TRINITY_DN114773_c2_g3;TRINITY_DN114773_c2_g4;TRINITY_DN91665_c0_g1;TRINITY_DN97936_c0_g4	5	3857	12	25617	0.0242566
GO:0003724	RNA helicase activity	molecular_function	10	TRINITY_DN101362_c0_g1;TRINITY_DN117145_c0_g1;TRINITY_DN119959_c1_g1;TRINITY_DN122399_c0_g2;TRINITY_DN83315_c0_g1	5	3857	12	25617	0.0242566
GO:0042793	plastid transcription	biological_process	9	TRINITY_DN114524_c0_g2;TRINITY_DN115584_c0_g1;TRINITY_DN121773_c0_g1;TRINITY_DN122009_c1_g1;TRINITY_DN96881_c1_g6	5	3857	12	25617	0.0242566
GO:0016593	Cdc73/Paf1 complex	cellular_component	5	TRINITY_DN100731_c0_g1;TRINITY_DN100731_c0_g2;TRINITY_DN106360_c0_g2;TRINITY_DN123904_c2_g1;TRINITY_DN96429_c3_g1	5	3857	12	25617	0.0242566
GO:0009627	systemic acquired resistance	biological_process	7	TRINITY_DN100484_c1_g4;TRINITY_DN102442_c1_g1;TRINITY_DN108414_c0_g1;TRINITY_DN109044_c0_g1;TRINITY_DN111421_c1_g1;TRINITY_DN117605_c1_g1;TRINITY_DN121291_c1_g1;TRINITY_DN124841_c3_g2;TRINITY_DN90653_c0_g1;TRINITY_DN98654_c2_g1	10	3857	34	25617	0.0244798
GO:0034976	response to endoplasmic reticulum stress	biological_process	6	TRINITY_DN106266_c0_g1;TRINITY_DN107360_c0_g1;TRINITY_DN109436_c0_g1;TRINITY_DN115780_c2_g1;TRINITY_DN118351_c1_g1;TRINITY_DN119855_c0_g1;TRINITY_DN119855_c0_g2;TRINITY_DN120471_c0_g1;TRINITY_DN90149_c0_g1;TRINITY_DN90149_c0_g2	10	3857	34	25617	0.0244798
GO:0016168	chlorophyll binding	molecular_function	6	TRINITY_DN100614_c1_g6;TRINITY_DN101076_c1_g1;TRINITY_DN103327_c1_g1;TRINITY_DN108301_c0_g1;TRINITY_DN108301_c1_g1;TRINITY_DN108301_c1_g3;TRINITY_DN108301_c1_g4;TRINITY_DN108301_c1_g6;TRINITY_DN109783_c4_g1;TRINITY_DN110381_c1_g3;TRINITY_DN112873_c1_g3;TRINITY_DN115898_c1_g1;TRINITY_DN116485_c1_g1;TRINITY_DN116485_c1_g3;TRINITY_DN121141_c3_g1;TRINITY_DN90943_c0_g1;TRINITY_DN99560_c0_g1	17	3857	69	25617	0.0248569
GO:0006099	tricarboxylic acid cycle	biological_process	5	TRINITY_DN100706_c2_g1;TRINITY_DN103282_c1_g3;TRINITY_DN106716_c0_g2;TRINITY_DN107914_c1_g2;TRINITY_DN108163_c0_g1;TRINITY_DN110790_c0_g1;TRINITY_DN113243_c0_g3;TRINITY_DN115078_c0_g1;TRINITY_DN116126_c0_g2;TRINITY_DN116427_c1_g2;TRINITY_DN116449_c0_g2;TRINITY_DN121583_c0_g2;TRINITY_DN91062_c0_g1;TRINITY_DN95006_c4_g3;TRINITY_DN95235_c2_g4;TRINITY_DN99606_c2_g1	16	3857	64	25617	0.0254269
GO:0042254	ribosome biogenesis	biological_process	6	TRINITY_DN106777_c0_g6;TRINITY_DN107299_c0_g2;TRINITY_DN108272_c6_g1;TRINITY_DN112041_c2_g1;TRINITY_DN112196_c0_g1;TRINITY_DN112715_c1_g2;TRINITY_DN113958_c0_g1;TRINITY_DN114765_c0_g2;TRINITY_DN118773_c0_g4;TRINITY_DN120707_c4_g2;TRINITY_DN122708_c0_g1;TRINITY_DN89149_c5_g3;TRINITY_DN92158_c2_g1;TRINITY_DN92158_c2_g4;TRINITY_DN92217_c0_g1;TRINITY_DN94295_c0_g1;TRINITY_DN96463_c1_g4;TRINITY_DN9646…	20	3857	85	25617	0.0256571
GO:0016887	ATPase activity	molecular_function	9	TRINITY_DN100034_c3_g2;TRINITY_DN100564_c0_g2;TRINITY_DN104666_c0_g1;TRINITY_DN106109_c0_g1;TRINITY_DN108818_c5_g3;TRINITY_DN109436_c0_g1;TRINITY_DN110261_c1_g5;TRINITY_DN112242_c0_g5;TRINITY_DN114448_c1_g5;TRINITY_DN116194_c0_g2;TRINITY_DN116788_c3_g1;TRINITY_DN117166_c1_g1;TRINITY_DN117423_c0_g1;TRINITY_DN117604_c0_g1;TRINITY_DN117860_c0_g1;TRINITY_DN119628_c1_g4;TRINITY_DN119628_c1_g7;TRINITY_…	44	3857	219	25617	0.0260818
GO:0009266	response to temperature stimulus	biological_process	5	TRINITY_DN104437_c4_g1;TRINITY_DN109127_c1_g1;TRINITY_DN109153_c0_g3;TRINITY_DN109955_c0_g1;TRINITY_DN116175_c0_g1;TRINITY_DN118311_c0_g1;TRINITY_DN118994_c1_g3;TRINITY_DN119082_c0_g1;TRINITY_DN119458_c2_g4;TRINITY_DN121349_c0_g1;TRINITY_DN124346_c3_g5;TRINITY_DN93161_c3_g1	12	3857	44	25617	0.0260858
GO:0044262	cellular carbohydrate metabolic process	biological_process	6	TRINITY_DN112087_c2_g3;TRINITY_DN114462_c2_g2;TRINITY_DN95261_c0_g1	3	3857	5	25617	0.0268744
GO:0048211	Golgi vesicle docking	biological_process	7	TRINITY_DN103999_c2_g1;TRINITY_DN110261_c1_g5;TRINITY_DN123561_c3_g3	3	3857	5	25617	0.0268744
GO:0050691	regulation of defense response to virus by host	biological_process	8	TRINITY_DN118942_c2_g1;TRINITY_DN93088_c0_g2;TRINITY_DN95226_c3_g1	3	3857	5	25617	0.0268744
GO:0006515	protein quality control for misfolded or incompletely synthesized proteins	biological_process	9	TRINITY_DN107770_c2_g1;TRINITY_DN108698_c0_g1;TRINITY_DN94519_c2_g2	3	3857	5	25617	0.0268744
GO:0016767	geranylgeranyl-diphosphate geranylgeranyltransferase activity	molecular_function	8	TRINITY_DN122518_c0_g1;TRINITY_DN122518_c1_g1;TRINITY_DN99056_c2_g2	3	3857	5	25617	0.0268744
GO:0003917	DNA topoisomerase type I activity	molecular_function	6	TRINITY_DN116997_c5_g1;TRINITY_DN117495_c0_g3;TRINITY_DN118401_c0_g2	3	3857	5	25617	0.0268744
GO:0043457	regulation of cellular respiration	biological_process	8	TRINITY_DN107784_c0_g1;TRINITY_DN107784_c0_g2;TRINITY_DN124920_c3_g1	3	3857	5	25617	0.0268744
GO:0048255	mRNA stabilization	biological_process	11	TRINITY_DN105201_c3_g2;TRINITY_DN107325_c0_g1;TRINITY_DN118876_c1_g1	3	3857	5	25617	0.0268744
GO:0071493	cellular response to UV-B	biological_process	9	TRINITY_DN112519_c2_g1;TRINITY_DN118690_c0_g1;TRINITY_DN94578_c0_g1	3	3857	5	25617	0.0268744
GO:0004775	succinate-CoA ligase (ADP-forming) activity	molecular_function	8	TRINITY_DN106716_c0_g2;TRINITY_DN116126_c0_g2;TRINITY_DN99606_c2_g1	3	3857	5	25617	0.0268744
GO:1900036	positive regulation of cellular response to heat	biological_process	7	TRINITY_DN113965_c0_g1;TRINITY_DN124388_c5_g2;TRINITY_DN93625_c0_g1	3	3857	5	25617	0.0268744
GO:0010313	phytochrome binding	molecular_function	5	TRINITY_DN104795_c0_g1;TRINITY_DN90468_c0_g2;TRINITY_DN92607_c0_g1	3	3857	5	25617	0.0268744
GO:0005652	nuclear lamina	cellular_component	6	TRINITY_DN116167_c0_g1;TRINITY_DN124189_c3_g1;TRINITY_DN93345_c0_g1	3	3857	5	25617	0.0268744
GO:0016584	nucleosome positioning	biological_process	8	TRINITY_DN106157_c1_g1;TRINITY_DN119119_c0_g1;TRINITY_DN119119_c0_g2	3	3857	5	25617	0.0268744
GO:0016656	monodehydroascorbate reductase (NADH) activity	molecular_function	7	TRINITY_DN108815_c1_g1;TRINITY_DN109468_c1_g4;TRINITY_DN120461_c1_g1	3	3857	5	25617	0.0268744
GO:0008187	poly-pyrimidine tract binding	molecular_function	8	TRINITY_DN105680_c0_g2;TRINITY_DN117518_c0_g2;TRINITY_DN91592_c0_g1	3	3857	5	25617	0.0268744
GO:0005684	U2-type spliceosomal complex	cellular_component	7	TRINITY_DN112955_c0_g1;TRINITY_DN115011_c0_g1;TRINITY_DN91459_c0_g3	3	3857	5	25617	0.0268744
GO:0000822	inositol hexakisphosphate binding	molecular_function	5	TRINITY_DN111441_c0_g1;TRINITY_DN113132_c0_g1;TRINITY_DN121327_c1_g1;TRINITY_DN121513_c0_g1;TRINITY_DN123014_c1_g2;TRINITY_DN123358_c3_g3;TRINITY_DN123398_c3_g1;TRINITY_DN123650_c1_g2;TRINITY_DN123650_c1_g4	9	3857	30	25617	0.0283181
GO:0046854	phosphatidylinositol phosphorylation	biological_process	10	TRINITY_DN100807_c0_g1;TRINITY_DN104005_c3_g1;TRINITY_DN113921_c0_g2;TRINITY_DN118302_c1_g1;TRINITY_DN119287_c0_g2;TRINITY_DN121752_c0_g3;TRINITY_DN125057_c2_g2	7	3857	21	25617	0.0292258
GO:1901001	negative regulation of response to salt stress	biological_process	7	TRINITY_DN104339_c0_g2;TRINITY_DN107510_c1_g2;TRINITY_DN112423_c0_g2;TRINITY_DN117926_c0_g1;TRINITY_DN121578_c0_g1;TRINITY_DN95936_c0_g1;TRINITY_DN98027_c1_g1	7	3857	21	25617	0.0292258
GO:0010380	regulation of chlorophyll biosynthetic process	biological_process	9	TRINITY_DN100034_c3_g2;TRINITY_DN107017_c0_g1;TRINITY_DN123711_c2_g1;TRINITY_DN123711_c2_g5;TRINITY_DN95846_c0_g1;TRINITY_DN96905_c1_g2;TRINITY_DN98343_c0_g2	7	3857	21	25617	0.0292258
GO:0006535	cysteine biosynthetic process from serine	biological_process	12	TRINITY_DN103932_c0_g1;TRINITY_DN111745_c0_g2;TRINITY_DN114897_c0_g3;TRINITY_DN119445_c0_g1;TRINITY_DN121717_c1_g1;TRINITY_DN123133_c3_g2;TRINITY_DN96997_c0_g4	7	3857	21	25617	0.0292258
GO:0006306	DNA methylation	biological_process	10	TRINITY_DN110093_c1_g1;TRINITY_DN112564_c2_g2;TRINITY_DN113173_c0_g3;TRINITY_DN115189_c2_g1;TRINITY_DN118614_c1_g1;TRINITY_DN122491_c0_g1;TRINITY_DN124518_c1_g1;TRINITY_DN124518_c2_g1;TRINITY_DN92978_c0_g7;TRINITY_DN99966_c0_g1	10	3857	35	25617	0.0297796
GO:0009734	auxin-activated signaling pathway	biological_process	6	TRINITY_DN101799_c1_g4;TRINITY_DN102960_c2_g1;TRINITY_DN103695_c1_g3;TRINITY_DN104042_c0_g2;TRINITY_DN105276_c0_g1;TRINITY_DN106132_c4_g2;TRINITY_DN106503_c0_g2;TRINITY_DN106777_c0_g6;TRINITY_DN110138_c0_g1;TRINITY_DN111345_c1_g1;TRINITY_DN111441_c0_g1;TRINITY_DN113132_c0_g1;TRINITY_DN114762_c0_g1;TRINITY_DN115810_c2_g1;TRINITY_DN117303_c3_g1;TRINITY_DN118599_c0_g1;TRINITY_DN121159_c2_g1;TRINITY_…	37	3857	181	25617	0.0304922
GO:0009295	nucleoid	cellular_component	3	TRINITY_DN109659_c1_g1;TRINITY_DN114173_c0_g2;TRINITY_DN114524_c0_g2;TRINITY_DN116013_c0_g1;TRINITY_DN116013_c0_g2;TRINITY_DN117311_c0_g1;TRINITY_DN122009_c1_g1;TRINITY_DN122544_c1_g1;TRINITY_DN122961_c2_g2;TRINITY_DN94387_c1_g1;TRINITY_DN96881_c1_g6	11	3857	40	25617	0.0305622
GO:0003924	GTPase activity	molecular_function	9	TRINITY_DN100349_c0_g1;TRINITY_DN101280_c1_g5;TRINITY_DN102970_c1_g2;TRINITY_DN108648_c1_g3;TRINITY_DN109564_c3_g2;TRINITY_DN109684_c1_g5;TRINITY_DN110738_c1_g2;TRINITY_DN110811_c0_g3;TRINITY_DN111860_c1_g1;TRINITY_DN112420_c0_g2;TRINITY_DN112579_c0_g2;TRINITY_DN112715_c1_g2;TRINITY_DN113885_c1_g1;TRINITY_DN113958_c0_g1;TRINITY_DN113975_c0_g5;TRINITY_DN115186_c1_g1;TRINITY_DN115204_c2_g3;TRINITY_…	54	3857	280	25617	0.0313258
GO:0008380	RNA splicing	biological_process	10	TRINITY_DN106332_c1_g3;TRINITY_DN106332_c1_g4;TRINITY_DN108008_c3_g2;TRINITY_DN108547_c0_g4;TRINITY_DN109599_c1_g1;TRINITY_DN110953_c0_g1;TRINITY_DN112163_c0_g2;TRINITY_DN112647_c1_g2;TRINITY_DN112889_c0_g1;TRINITY_DN113672_c1_g4;TRINITY_DN114826_c1_g2;TRINITY_DN115584_c0_g1;TRINITY_DN115706_c1_g2;TRINITY_DN118644_c1_g2;TRINITY_DN118722_c1_g1;TRINITY_DN124085_c0_g1;TRINITY_DN124139_c5_g1;TRINITY_…	22	3857	98	25617	0.0329503
GO:0005759	mitochondrial matrix	cellular_component	7	TRINITY_DN103107_c0_g1;TRINITY_DN104316_c1_g3;TRINITY_DN104553_c1_g2;TRINITY_DN105094_c1_g2;TRINITY_DN105708_c3_g3;TRINITY_DN109626_c0_g3;TRINITY_DN110270_c0_g3;TRINITY_DN112016_c0_g1;TRINITY_DN112016_c0_g2;TRINITY_DN115078_c0_g1;TRINITY_DN115195_c2_g3;TRINITY_DN116041_c0_g1;TRINITY_DN116126_c0_g2;TRINITY_DN117083_c0_g4;TRINITY_DN118645_c2_g2;TRINITY_DN119387_c1_g2;TRINITY_DN119693_c0_g3;TRINITY_…	26	3857	120	25617	0.0330182
GO:0016560	protein import into peroxisome matrix, docking	biological_process	6	TRINITY_DN119481_c0_g4;TRINITY_DN119886_c0_g1;TRINITY_DN122862_c0_g1;TRINITY_DN99193_c0_g1	4	3857	9	25617	0.0343323
GO:0052852	very-long-chain-(S)-2-hydroxy-acid oxidase activity	molecular_function	8	TRINITY_DN115549_c0_g1;TRINITY_DN118104_c2_g3;TRINITY_DN97655_c1_g1;TRINITY_DN97655_c1_g2	4	3857	9	25617	0.0343323
GO:0052853	long-chain-(S)-2-hydroxy-long-chain-acid oxidase activity	molecular_function	8	TRINITY_DN115549_c0_g1;TRINITY_DN118104_c2_g3;TRINITY_DN97655_c1_g1;TRINITY_DN97655_c1_g2	4	3857	9	25617	0.0343323
GO:0004161	dimethylallyltranstransferase activity	molecular_function	7	TRINITY_DN114032_c2_g4;TRINITY_DN119484_c1_g1;TRINITY_DN120380_c1_g4;TRINITY_DN94793_c1_g1	4	3857	9	25617	0.0343323
GO:0052854	medium-chain-(S)-2-hydroxy-acid oxidase activity	molecular_function	8	TRINITY_DN115549_c0_g1;TRINITY_DN118104_c2_g3;TRINITY_DN97655_c1_g1;TRINITY_DN97655_c1_g2	4	3857	9	25617	0.0343323
GO:0070545	PeBoW complex	cellular_component	4	TRINITY_DN102026_c0_g1;TRINITY_DN117972_c0_g3;TRINITY_DN118577_c2_g1;TRINITY_DN125233_c12_g1	4	3857	9	25617	0.0343323
GO:0031540	regulation of anthocyanin biosynthetic process	biological_process	8	TRINITY_DN109374_c1_g2;TRINITY_DN121928_c0_g1;TRINITY_DN124769_c1_g2;TRINITY_DN99151_c0_g1	4	3857	9	25617	0.0343323
GO:0046863	ribulose-1,5-bisphosphate carboxylase/oxygenase activator activity	molecular_function	6	TRINITY_DN111696_c1_g1;TRINITY_DN124315_c2_g2;TRINITY_DN124315_c2_g3;TRINITY_DN96320_c2_g1	4	3857	9	25617	0.0343323
GO:0005786	signal recognition particle, endoplasmic reticulum targeting	cellular_component	7	TRINITY_DN110811_c0_g3;TRINITY_DN111860_c1_g1;TRINITY_DN116222_c0_g1;TRINITY_DN119020_c0_g3;TRINITY_DN88483_c0_g1	5	3857	13	25617	0.0346294
GO:0071012	catalytic step 1 spliceosome	cellular_component	7	TRINITY_DN106276_c0_g1;TRINITY_DN106276_c0_g2;TRINITY_DN121847_c0_g1;TRINITY_DN124536_c2_g1;TRINITY_DN96013_c1_g1	5	3857	13	25617	0.0346294
GO:0031491	nucleosome binding	molecular_function	5	TRINITY_DN102379_c0_g1;TRINITY_DN110501_c5_g1;TRINITY_DN119777_c1_g1;TRINITY_DN119777_c1_g3;TRINITY_DN97801_c1_g2	5	3857	13	25617	0.0346294
GO:0008891	glycolate oxidase activity	molecular_function	8	TRINITY_DN115549_c0_g1;TRINITY_DN118104_c2_g3;TRINITY_DN120121_c2_g1;TRINITY_DN97655_c1_g1;TRINITY_DN97655_c1_g2	5	3857	13	25617	0.0346294
GO:0000373	Group II intron splicing	biological_process	13	TRINITY_DN109496_c0_g2;TRINITY_DN112663_c0_g2;TRINITY_DN118685_c0_g1;TRINITY_DN119295_c1_g2;TRINITY_DN95039_c0_g2	5	3857	13	25617	0.0346294
GO:0048653	anther development	biological_process	5	TRINITY_DN105535_c0_g2;TRINITY_DN108813_c0_g2;TRINITY_DN90574_c0_g1;TRINITY_DN93210_c2_g1;TRINITY_DN97554_c0_g1	5	3857	13	25617	0.0346294
GO:0045087	innate immune response	biological_process	5	TRINITY_DN100271_c0_g3;TRINITY_DN101261_c2_g1;TRINITY_DN104655_c1_g1;TRINITY_DN107405_c3_g2;TRINITY_DN108003_c0_g1;TRINITY_DN111089_c0_g4;TRINITY_DN113708_c0_g1;TRINITY_DN118851_c2_g1;TRINITY_DN121204_c3_g1;TRINITY_DN121621_c3_g4;TRINITY_DN123331_c1_g1;TRINITY_DN123331_c2_g5;TRINITY_DN124803_c4_g5;TRINITY_DN97133_c0_g1;TRINITY_DN98237_c1_g1;TRINITY_DN99861_c0_g1	16	3857	67	25617	0.0378165
GO:0022627	cytosolic small ribosomal subunit	cellular_component	8	TRINITY_DN100436_c0_g3;TRINITY_DN101645_c0_g1;TRINITY_DN102517_c0_g1;TRINITY_DN102671_c1_g1;TRINITY_DN104091_c0_g1;TRINITY_DN104442_c2_g2;TRINITY_DN106637_c0_g1;TRINITY_DN108272_c6_g1;TRINITY_DN108768_c1_g1;TRINITY_DN108768_c1_g3;TRINITY_DN109178_c2_g1;TRINITY_DN109178_c2_g2;TRINITY_DN109178_c2_g5;TRINITY_DN111069_c1_g1;TRINITY_DN111351_c1_g3;TRINITY_DN111351_c1_g5;TRINITY_DN112056_c0_g1;TRINITY_…	38	3857	190	25617	0.0387683
GO:0009768	photosynthesis, light harvesting in photosystem I	biological_process	7	TRINITY_DN100614_c1_g6;TRINITY_DN101076_c1_g1;TRINITY_DN103420_c1_g2;TRINITY_DN108301_c0_g1;TRINITY_DN108301_c1_g1;TRINITY_DN108301_c1_g3;TRINITY_DN108301_c1_g4;TRINITY_DN108301_c1_g6;TRINITY_DN109783_c4_g1;TRINITY_DN110381_c1_g3;TRINITY_DN112873_c1_g3;TRINITY_DN116485_c1_g1;TRINITY_DN116485_c1_g3;TRINITY_DN121141_c3_g1;TRINITY_DN99560_c0_g1	15	3857	62	25617	0.0391081
GO:0006108	malate metabolic process	biological_process	9	TRINITY_DN101310_c1_g1;TRINITY_DN103282_c1_g3;TRINITY_DN107914_c1_g2;TRINITY_DN108163_c0_g1;TRINITY_DN113243_c0_g3;TRINITY_DN115078_c0_g1;TRINITY_DN116449_c0_g2;TRINITY_DN119995_c0_g1	8	3857	27	25617	0.0404657
GO:0006417	regulation of translation	biological_process	9	TRINITY_DN104042_c0_g2;TRINITY_DN109319_c0_g7;TRINITY_DN110641_c3_g1;TRINITY_DN112196_c0_g1;TRINITY_DN116041_c0_g1;TRINITY_DN117303_c3_g1;TRINITY_DN117403_c0_g1;TRINITY_DN118170_c0_g2;TRINITY_DN121834_c0_g1;TRINITY_DN121834_c1_g1;TRINITY_DN122344_c1_g2;TRINITY_DN123186_c2_g1;TRINITY_DN123242_c1_g1;TRINITY_DN125222_c6_g1;TRINITY_DN87386_c2_g1;TRINITY_DN88706_c0_g1;TRINITY_DN99770_c2_g2	17	3857	73	25617	0.0410972
GO:0015031	protein transport	biological_process	9	TRINITY_DN101073_c3_g1;TRINITY_DN102646_c0_g1;TRINITY_DN102759_c0_g1;TRINITY_DN104770_c2_g1;TRINITY_DN104867_c0_g1;TRINITY_DN105542_c1_g1;TRINITY_DN106752_c1_g1;TRINITY_DN106960_c2_g2;TRINITY_DN108158_c1_g1;TRINITY_DN110155_c1_g1;TRINITY_DN110448_c1_g1;TRINITY_DN110738_c1_g2;TRINITY_DN111025_c0_g1;TRINITY_DN113497_c1_g4;TRINITY_DN113497_c1_g5;TRINITY_DN113643_c0_g1;TRINITY_DN114448_c1_g3;TRINITY_…	43	3857	220	25617	0.0413848
GO:0000775	chromosome, centromeric region	cellular_component	7	TRINITY_DN108017_c2_g1;TRINITY_DN108473_c0_g2;TRINITY_DN110535_c3_g4;TRINITY_DN114057_c0_g1;TRINITY_DN117446_c0_g1;TRINITY_DN119052_c0_g1	6	3857	18	25617	0.0425207
GO:0016161	beta-amylase activity	molecular_function	8	TRINITY_DN110724_c0_g1;TRINITY_DN111698_c0_g2;TRINITY_DN121693_c0_g1;TRINITY_DN121693_c0_g2;TRINITY_DN123042_c2_g4;TRINITY_DN92515_c2_g1	6	3857	18	25617	0.0425207
GO:0015693	magnesium ion transport	biological_process	10	TRINITY_DN103758_c0_g1;TRINITY_DN117000_c1_g5;TRINITY_DN118609_c0_g1;TRINITY_DN120761_c0_g2;TRINITY_DN121628_c1_g4;TRINITY_DN96682_c0_g1	6	3857	18	25617	0.0425207
GO:0004165	dodecenoyl-CoA delta-isomerase activity	molecular_function	7	TRINITY_DN104476_c1_g1;TRINITY_DN109086_c1_g1;TRINITY_DN110768_c0_g3;TRINITY_DN119528_c1_g1;TRINITY_DN124883_c5_g1;TRINITY_DN79651_c0_g1	6	3857	18	25617	0.0425207
GO:0048367	shoot system development	biological_process	6	TRINITY_DN102228_c0_g2;TRINITY_DN112196_c0_g1;TRINITY_DN112889_c0_g1;TRINITY_DN116230_c0_g1;TRINITY_DN119783_c3_g2;TRINITY_DN119936_c1_g1;TRINITY_DN123893_c4_g1;TRINITY_DN124005_c3_g1;TRINITY_DN96463_c1_g4;TRINITY_DN96463_c1_g5;TRINITY_DN98368_c2_g1	11	3857	42	25617	0.0426736
GO:0009416	response to light stimulus	biological_process	6	TRINITY_DN100614_c1_g6;TRINITY_DN100659_c1_g2;TRINITY_DN101076_c1_g1;TRINITY_DN102373_c2_g1;TRINITY_DN103271_c0_g1;TRINITY_DN103442_c0_g1;TRINITY_DN103952_c1_g1;TRINITY_DN104316_c1_g3;TRINITY_DN105126_c0_g5;TRINITY_DN107093_c2_g2;TRINITY_DN108301_c0_g1;TRINITY_DN108301_c1_g1;TRINITY_DN108301_c1_g3;TRINITY_DN108301_c1_g4;TRINITY_DN108301_c1_g6;TRINITY_DN108544_c0_g1;TRINITY_DN109783_c4_g1;TRINITY_…	52	3857	274	25617	0.0440453
GO:0046686	response to cadmium ion	biological_process	7	TRINITY_DN101261_c2_g1;TRINITY_DN103107_c0_g1;TRINITY_DN103694_c0_g2;TRINITY_DN103932_c0_g1;TRINITY_DN104316_c1_g3;TRINITY_DN104655_c1_g1;TRINITY_DN104920_c2_g1;TRINITY_DN105076_c1_g2;TRINITY_DN105959_c2_g6;TRINITY_DN106716_c0_g2;TRINITY_DN107242_c0_g1;TRINITY_DN107360_c0_g1;TRINITY_DN107416_c1_g1;TRINITY_DN108564_c1_g1;TRINITY_DN108815_c1_g1;TRINITY_DN109319_c0_g7;TRINITY_DN109436_c0_g1;TRINITY_…	97	3857	547	25617	0.0459501
GO:0006396	RNA processing	biological_process	9	TRINITY_DN102826_c1_g1;TRINITY_DN111067_c2_g1;TRINITY_DN111822_c0_g1;TRINITY_DN112982_c0_g1;TRINITY_DN114222_c1_g1;TRINITY_DN118170_c0_g2;TRINITY_DN119907_c0_g1;TRINITY_DN120968_c1_g1;TRINITY_DN124085_c0_g1;TRINITY_DN81848_c0_g1;TRINITY_DN86232_c0_g1;TRINITY_DN95166_c1_g1;TRINITY_DN96480_c2_g1;TRINITY_DN97133_c0_g1	14	3857	58	25617	0.0460261
GO:0032040	small-subunit processome	cellular_component	6	TRINITY_DN101993_c0_g3;TRINITY_DN104754_c0_g2;TRINITY_DN105034_c1_g1;TRINITY_DN107230_c0_g1;TRINITY_DN109728_c3_g3;TRINITY_DN110492_c0_g2;TRINITY_DN112938_c7_g6;TRINITY_DN118139_c1_g1;TRINITY_DN120499_c1_g2;TRINITY_DN120669_c0_g1;TRINITY_DN121145_c1_g2;TRINITY_DN121201_c0_g1;TRINITY_DN121201_c0_g3;TRINITY_DN123979_c5_g2;TRINITY_DN89555_c1_g1;TRINITY_DN95016_c0_g1;TRINITY_DN99489_c1_g1	17	3857	74	25617	0.0461355
GO:0042026	protein refolding	biological_process	5	TRINITY_DN100484_c1_g4;TRINITY_DN104920_c2_g1;TRINITY_DN105076_c1_g2;TRINITY_DN109044_c0_g1;TRINITY_DN109626_c0_g3;TRINITY_DN109963_c1_g1;TRINITY_DN113696_c0_g3;TRINITY_DN114900_c0_g4;TRINITY_DN118311_c0_g1;TRINITY_DN118994_c1_g3;TRINITY_DN120833_c0_g2;TRINITY_DN120833_c1_g1;TRINITY_DN124346_c3_g5;TRINITY_DN124841_c3_g2;TRINITY_DN125043_c6_g2;TRINITY_DN90653_c0_g1;TRINITY_DN93161_c3_g1	17	3857	74	25617	0.0461355
GO:0004519	endonuclease activity	molecular_function	7	TRINITY_DN104413_c0_g2;TRINITY_DN107325_c0_g1;TRINITY_DN109854_c0_g2;TRINITY_DN113509_c3_g2;TRINITY_DN113509_c3_g4;TRINITY_DN115169_c0_g1;TRINITY_DN116041_c0_g1;TRINITY_DN117046_c0_g1;TRINITY_DN117355_c1_g4;TRINITY_DN118739_c1_g1;TRINITY_DN121017_c0_g4;TRINITY_DN122009_c1_g1;TRINITY_DN122063_c6_g2;TRINITY_DN123186_c2_g1;TRINITY_DN123874_c2_g1;TRINITY_DN96727_c1_g2;TRINITY_DN98915_c0_g1	17	3857	74	25617	0.0461355
GO:0009408	response to heat	biological_process	5	TRINITY_DN100561_c0_g4;TRINITY_DN102639_c1_g1;TRINITY_DN103107_c0_g1;TRINITY_DN103342_c0_g1;TRINITY_DN103694_c0_g2;TRINITY_DN104920_c2_g1;TRINITY_DN105038_c0_g2;TRINITY_DN105685_c2_g1;TRINITY_DN107360_c0_g1;TRINITY_DN107405_c3_g2;TRINITY_DN107900_c1_g1;TRINITY_DN108160_c1_g2;TRINITY_DN108191_c3_g2;TRINITY_DN109626_c0_g3;TRINITY_DN109963_c1_g1;TRINITY_DN110030_c2_g4;TRINITY_DN110857_c0_g2;TRINITY_…	51	3857	269	25617	0.0464425
GO:0000974	Prp19 complex	cellular_component	4	TRINITY_DN106276_c0_g1;TRINITY_DN106276_c0_g2;TRINITY_DN113277_c3_g2;TRINITY_DN117287_c0_g1;TRINITY_DN121847_c0_g1;TRINITY_DN124536_c2_g1;TRINITY_DN96013_c1_g1	7	3857	23	25617	0.0470524
GO:0061630	ubiquitin protein ligase activity	molecular_function	7	TRINITY_DN101581_c1_g1;TRINITY_DN102396_c0_g1;TRINITY_DN102474_c1_g1;TRINITY_DN102708_c0_g1;TRINITY_DN103203_c1_g3;TRINITY_DN104159_c0_g1;TRINITY_DN106020_c1_g1;TRINITY_DN106194_c0_g1;TRINITY_DN106302_c1_g1;TRINITY_DN107514_c0_g2;TRINITY_DN109099_c1_g1;TRINITY_DN109449_c0_g2;TRINITY_DN110038_c0_g1;TRINITY_DN111436_c0_g1;TRINITY_DN111532_c4_g1;TRINITY_DN112286_c1_g2;TRINITY_DN112659_c3_g2;TRINITY_…	56	3857	299	25617	0.0470927
GO:0022626	cytosolic ribosome	cellular_component	7	TRINITY_DN100484_c1_g4;TRINITY_DN102292_c2_g2;TRINITY_DN104316_c1_g3;TRINITY_DN107416_c1_g1;TRINITY_DN108564_c1_g1;TRINITY_DN109044_c0_g1;TRINITY_DN109626_c0_g3;TRINITY_DN110187_c1_g6;TRINITY_DN110432_c2_g1;TRINITY_DN111670_c0_g2;TRINITY_DN112196_c0_g1;TRINITY_DN113696_c0_g3;TRINITY_DN114900_c0_g4;TRINITY_DN115195_c2_g3;TRINITY_DN115549_c0_g1;TRINITY_DN121301_c2_g5;TRINITY_DN123640_c1_g1;TRINITY_…	26	3857	124	25617	0.0472482
GO:0009787	regulation of abscisic acid-activated signaling pathway	biological_process	8	TRINITY_DN107510_c1_g2;TRINITY_DN108417_c1_g2;TRINITY_DN116864_c4_g1;TRINITY_DN122362_c0_g1;TRINITY_DN98206_c0_g2	5	3857	14	25617	0.0473581
GO:0019344	cysteine biosynthetic process	biological_process	11	TRINITY_DN103932_c0_g1;TRINITY_DN114897_c0_g3;TRINITY_DN121717_c1_g1;TRINITY_DN123133_c3_g2;TRINITY_DN96997_c0_g4	5	3857	14	25617	0.0473581
GO:0002238	response to molecule of fungal origin	biological_process	6	TRINITY_DN119985_c3_g1;TRINITY_DN86628_c0_g1;TRINITY_DN97193_c0_g1	3	3857	6	25617	0.0477873
GO:0009916	alternative oxidase activity	molecular_function	7	TRINITY_DN110593_c1_g1;TRINITY_DN114146_c0_g1;TRINITY_DN119082_c0_g1	3	3857	6	25617	0.0477873
GO:0010601	positive regulation of auxin biosynthetic process	biological_process	10	TRINITY_DN102495_c0_g2;TRINITY_DN110904_c0_g2;TRINITY_DN124846_c5_g6	3	3857	6	25617	0.0477873
GO:0004824	lysine-tRNA ligase activity	molecular_function	7	TRINITY_DN119788_c0_g2;TRINITY_DN122967_c1_g4;TRINITY_DN97330_c3_g2	3	3857	6	25617	0.0477873
GO:0015994	chlorophyll metabolic process	biological_process	8	TRINITY_DN109127_c1_g1;TRINITY_DN113158_c0_g1;TRINITY_DN93651_c0_g1	3	3857	6	25617	0.0477873
GO:0008023	transcription elongation factor complex	cellular_component	4	TRINITY_DN119777_c1_g1;TRINITY_DN119777_c1_g3;TRINITY_DN120568_c0_g1	3	3857	6	25617	0.0477873
GO:0006435	threonyl-tRNA aminoacylation	biological_process	13	TRINITY_DN108490_c0_g2;TRINITY_DN114227_c0_g3;TRINITY_DN119099_c0_g1	3	3857	6	25617	0.0477873
GO:0102721	ubiquinol:oxygen oxidoreductase activity	molecular_function	7	TRINITY_DN110593_c1_g1;TRINITY_DN114146_c0_g1;TRINITY_DN119082_c0_g1	3	3857	6	25617	0.0477873
GO:0004829	threonine-tRNA ligase activity	molecular_function	7	TRINITY_DN108490_c0_g2;TRINITY_DN114227_c0_g3;TRINITY_DN119099_c0_g1	3	3857	6	25617	0.0477873
GO:0006574	valine catabolic process	biological_process	11	TRINITY_DN107213_c2_g1;TRINITY_DN122960_c2_g1;TRINITY_DN91669_c0_g1	3	3857	6	25617	0.0477873
GO:0000350	generation of catalytic spliceosome for second transesterification step	biological_process	9	TRINITY_DN106276_c0_g1;TRINITY_DN106276_c0_g2;TRINITY_DN112647_c1_g2	3	3857	6	25617	0.0477873
GO:0004096	catalase activity	molecular_function	5	TRINITY_DN125095_c1_g2;TRINITY_DN125095_c1_g3;TRINITY_DN125095_c1_g4	3	3857	6	25617	0.0477873
GO:0000794	condensed nuclear chromosome	cellular_component	8	TRINITY_DN102531_c0_g1;TRINITY_DN117444_c0_g1;TRINITY_DN122241_c2_g1	3	3857	6	25617	0.0477873
GO:0006430	lysyl-tRNA aminoacylation	biological_process	13	TRINITY_DN119788_c0_g2;TRINITY_DN122967_c1_g4;TRINITY_DN97330_c3_g2	3	3857	6	25617	0.0477873
GO:0071249	cellular response to nitrate	biological_process	7	TRINITY_DN111634_c5_g1;TRINITY_DN111783_c0_g1;TRINITY_DN117316_c1_g1	3	3857	6	25617	0.0477873
GO:0009575	chromoplast stroma	cellular_component	8	TRINITY_DN122518_c0_g1;TRINITY_DN122518_c1_g1;TRINITY_DN99056_c2_g2	3	3857	6	25617	0.0477873
GO:0009657	plastid organization	biological_process	6	TRINITY_DN111882_c0_g2;TRINITY_DN118170_c0_g2;TRINITY_DN119082_c0_g1	3	3857	6	25617	0.0477873
GO:0001732	formation of cytoplasmic translation initiation complex	biological_process	9	TRINITY_DN107442_c0_g1;TRINITY_DN122344_c1_g2;TRINITY_DN94437_c1_g1	3	3857	6	25617	0.0477873
GO:0044183	protein binding involved in protein folding	molecular_function	3	TRINITY_DN100484_c1_g4;TRINITY_DN100807_c0_g1;TRINITY_DN103107_c0_g1;TRINITY_DN104005_c3_g1;TRINITY_DN105076_c1_g2;TRINITY_DN107242_c0_g1;TRINITY_DN107567_c2_g1;TRINITY_DN109044_c0_g1;TRINITY_DN109626_c0_g3;TRINITY_DN111114_c4_g1;TRINITY_DN113696_c0_g3;TRINITY_DN114900_c0_g4;TRINITY_DN118311_c0_g1;TRINITY_DN118994_c1_g3;TRINITY_DN120309_c2_g1;TRINITY_DN120929_c0_g1;TRINITY_DN124346_c3_g5;TRINITY_…	22	3857	102	25617	0.0490349
GO:0009411	response to UV	biological_process	7	TRINITY_DN104156_c0_g2;TRINITY_DN108337_c0_g1;TRINITY_DN111319_c2_g2;TRINITY_DN112786_c0_g1;TRINITY_DN119628_c1_g7;TRINITY_DN120775_c0_g1;TRINITY_DN122193_c0_g2;TRINITY_DN123468_c5_g1;TRINITY_DN98915_c0_g1	9	3857	33	25617	0.0503883
GO:0006338	chromatin remodeling	biological_process	6	TRINITY_DN113070_c1_g3;TRINITY_DN115442_c0_g1;TRINITY_DN116788_c3_g1;TRINITY_DN116997_c5_g1;TRINITY_DN117774_c2_g1;TRINITY_DN119171_c0_g1;TRINITY_DN122706_c3_g1;TRINITY_DN122799_c1_g1;TRINITY_DN124281_c1_g1;TRINITY_DN97554_c0_g1	10	3857	38	25617	0.0504171
GO:0080005	photosystem stoichiometry adjustment	biological_process	8	TRINITY_DN92234_c1_g2;TRINITY_DN94715_c0_g1;TRINITY_DN95244_c0_g1;TRINITY_DN99667_c0_g1	4	3857	10	25617	0.0505405
GO:0046283	anthocyanin-containing compound metabolic process	biological_process	6	TRINITY_DN114159_c1_g1;TRINITY_DN114159_c1_g2;TRINITY_DN119272_c1_g2;TRINITY_DN122914_c1_g4	4	3857	10	25617	0.0505405
GO:0006997	nucleus organization	biological_process	6	TRINITY_DN108579_c0_g2;TRINITY_DN116167_c0_g1;TRINITY_DN124189_c3_g1;TRINITY_DN93345_c0_g1	4	3857	10	25617	0.0505405
GO:0031359	integral component of chloroplast outer membrane	cellular_component	9	TRINITY_DN105545_c0_g1;TRINITY_DN109578_c2_g2;TRINITY_DN109720_c1_g3;TRINITY_DN123613_c3_g1	4	3857	10	25617	0.0505405
GO:0071277	cellular response to calcium ion	biological_process	8	TRINITY_DN107405_c3_g2;TRINITY_DN121621_c3_g4;TRINITY_DN123331_c1_g1;TRINITY_DN123331_c2_g5	4	3857	10	25617	0.0505405
GO:0007205	protein kinase C-activating G-protein coupled receptor signaling pathway	biological_process	6	TRINITY_DN102624_c0_g1;TRINITY_DN109434_c0_g2;TRINITY_DN120023_c3_g2;TRINITY_DN94627_c5_g1	4	3857	10	25617	0.0505405
GO:0050378	UDP-glucuronate 4-epimerase activity	molecular_function	7	TRINITY_DN105650_c0_g1;TRINITY_DN112894_c1_g1;TRINITY_DN118937_c1_g1;TRINITY_DN119087_c0_g1	4	3857	10	25617	0.0505405
GO:0004143	diacylglycerol kinase activity	molecular_function	7	TRINITY_DN102624_c0_g1;TRINITY_DN109434_c0_g2;TRINITY_DN120023_c3_g2;TRINITY_DN94627_c5_g1	4	3857	10	25617	0.0505405
GO:0010099	regulation of photomorphogenesis	biological_process	8	TRINITY_DN109358_c3_g2;TRINITY_DN112408_c2_g3;TRINITY_DN112986_c1_g1;TRINITY_DN92607_c0_g1	4	3857	10	25617	0.0505405
GO:0009915	phloem sucrose loading	biological_process	11	TRINITY_DN106073_c0_g1;TRINITY_DN106297_c0_g1;TRINITY_DN109127_c1_g1;TRINITY_DN115738_c2_g1	4	3857	10	25617	0.0505405
GO:0000154	rRNA modification	biological_process	12	TRINITY_DN104754_c0_g2;TRINITY_DN105034_c1_g1;TRINITY_DN118139_c1_g1;TRINITY_DN99489_c1_g1	4	3857	10	25617	0.0505405
GO:0010047	fruit dehiscence	biological_process	6	TRINITY_DN105276_c0_g1;TRINITY_DN115810_c2_g1;TRINITY_DN121159_c2_g1;TRINITY_DN121159_c2_g3	4	3857	10	25617	0.0505405
GO:0005622	intracellular	cellular_component	4	TRINITY_DN100349_c0_g1;TRINITY_DN101117_c1_g1;TRINITY_DN101297_c1_g3;TRINITY_DN103730_c1_g3;TRINITY_DN104042_c0_g2;TRINITY_DN104920_c2_g1;TRINITY_DN109572_c0_g1;TRINITY_DN109963_c1_g1;TRINITY_DN110291_c3_g1;TRINITY_DN111434_c0_g1;TRINITY_DN111574_c1_g2;TRINITY_DN112420_c0_g2;TRINITY_DN112858_c0_g1;TRINITY_DN112922_c0_g3;TRINITY_DN113432_c0_g1;TRINITY_DN113474_c0_g4;TRINITY_DN113882_c0_g1;TRINITY_…	65	3857	355	25617	0.0520562
GO:0048511	rhythmic process	biological_process	3	TRINITY_DN108723_c0_g3;TRINITY_DN109166_c2_g2;TRINITY_DN112408_c2_g3;TRINITY_DN112647_c1_g2;TRINITY_DN121009_c0_g1;TRINITY_DN122034_c0_g1	6	3857	19	25617	0.054476
GO:0048467	gynoecium development	biological_process	6	TRINITY_DN106777_c0_g6;TRINITY_DN108149_c0_g3;TRINITY_DN109374_c1_g2;TRINITY_DN114244_c0_g3;TRINITY_DN120570_c2_g1;TRINITY_DN121578_c0_g1	6	3857	19	25617	0.054476
GO:0070181	small ribosomal subunit rRNA binding	molecular_function	8	TRINITY_DN101993_c0_g3;TRINITY_DN105459_c1_g1;TRINITY_DN116502_c3_g2;TRINITY_DN92904_c2_g1;TRINITY_DN96714_c0_g3;TRINITY_DN96714_c0_g4	6	3857	19	25617	0.054476
GO:0009620	response to fungus	biological_process	7	TRINITY_DN104418_c0_g1;TRINITY_DN108337_c0_g1;TRINITY_DN110323_c1_g1;TRINITY_DN114045_c0_g3;TRINITY_DN119985_c3_g1;TRINITY_DN120570_c2_g1;TRINITY_DN122193_c0_g2;TRINITY_DN123575_c1_g3;TRINITY_DN125202_c1_g1;TRINITY_DN96320_c2_g2;TRINITY_DN97193_c0_g1;TRINITY_DN98206_c0_g2	12	3857	49	25617	0.0561088
GO:0005768	endosome	cellular_component	7	TRINITY_DN100807_c0_g1;TRINITY_DN100914_c2_g1;TRINITY_DN101727_c0_g1;TRINITY_DN102228_c0_g2;TRINITY_DN103589_c1_g3;TRINITY_DN104005_c3_g1;TRINITY_DN105028_c0_g2;TRINITY_DN105525_c0_g2;TRINITY_DN105542_c1_g1;TRINITY_DN105841_c1_g2;TRINITY_DN106267_c1_g1;TRINITY_DN106414_c4_g1;TRINITY_DN106960_c2_g2;TRINITY_DN106970_c0_g2;TRINITY_DN107603_c1_g3;TRINITY_DN107741_c0_g1;TRINITY_DN107949_c0_g2;TRINITY_…	67	3857	369	25617	0.0569433
GO:0005525	GTP binding	molecular_function	8	TRINITY_DN102970_c1_g2;TRINITY_DN106960_c2_g2;TRINITY_DN107586_c2_g2;TRINITY_DN108648_c1_g3;TRINITY_DN109564_c3_g2;TRINITY_DN109577_c1_g1;TRINITY_DN109684_c1_g5;TRINITY_DN110738_c1_g2;TRINITY_DN110811_c0_g3;TRINITY_DN111860_c1_g1;TRINITY_DN112285_c1_g1;TRINITY_DN112579_c0_g2;TRINITY_DN112858_c0_g1;TRINITY_DN112960_c6_g3;TRINITY_DN113689_c0_g1;TRINITY_DN113885_c1_g1;TRINITY_DN113958_c0_g1;TRINITY_…	50	3857	267	25617	0.0578801
GO:0009755	hormone-mediated signaling pathway	biological_process	5	TRINITY_DN120097_c0_g2;TRINITY_DN122164_c1_g2;TRINITY_DN124439_c0_g1;TRINITY_DN124906_c3_g4;TRINITY_DN124991_c3_g1;TRINITY_DN124991_c3_g3;TRINITY_DN92363_c0_g1	7	3857	24	25617	0.0580923
GO:0071472	cellular response to salt stress	biological_process	7	TRINITY_DN102456_c1_g1;TRINITY_DN106910_c1_g1;TRINITY_DN108417_c1_g2;TRINITY_DN109269_c0_g1;TRINITY_DN116864_c4_g1;TRINITY_DN121493_c0_g1;TRINITY_DN122736_c1_g1;TRINITY_DN124710_c4_g1;TRINITY_DN125282_c9_g5	9	3857	34	25617	0.0597154
GO:0010228	vegetative to reproductive phase transition of meristem	biological_process	5	TRINITY_DN100731_c0_g1;TRINITY_DN100731_c0_g2;TRINITY_DN101261_c2_g1;TRINITY_DN104655_c1_g1;TRINITY_DN104696_c0_g1;TRINITY_DN106157_c1_g1;TRINITY_DN108240_c1_g5;TRINITY_DN112647_c1_g2;TRINITY_DN113048_c2_g2;TRINITY_DN113708_c0_g1;TRINITY_DN114184_c1_g3;TRINITY_DN119119_c0_g1;TRINITY_DN119119_c0_g2;TRINITY_DN120924_c3_g3;TRINITY_DN121115_c1_g1;TRINITY_DN122730_c0_g1;TRINITY_DN93469_c0_g2;TRINITY_D…	20	3857	93	25617	0.0599991
GO:0005777	peroxisome	cellular_component	7	TRINITY_DN100037_c0_g2;TRINITY_DN100706_c2_g1;TRINITY_DN101261_c2_g1;TRINITY_DN101526_c0_g1;TRINITY_DN102759_c0_g1;TRINITY_DN104476_c1_g1;TRINITY_DN104655_c1_g1;TRINITY_DN107249_c1_g2;TRINITY_DN107914_c1_g2;TRINITY_DN108629_c0_g1;TRINITY_DN108815_c1_g1;TRINITY_DN109086_c1_g1;TRINITY_DN109574_c1_g1;TRINITY_DN110542_c2_g3;TRINITY_DN110768_c0_g3;TRINITY_DN110921_c0_g1;TRINITY_DN111205_c2_g2;TRINITY_…	48	3857	256	25617	0.0609247
GO:0008650	rRNA (uridine-2'-O-)-methyltransferase activity	molecular_function	10	TRINITY_DN112483_c2_g1;TRINITY_DN122558_c1_g2	2	3857	3	25617	0.0611717
GO:0004320	oleoyl-[acyl-carrier-protein] hydrolase activity	molecular_function	9	TRINITY_DN110998_c0_g2;TRINITY_DN99076_c2_g1	2	3857	3	25617	0.0611717
GO:0044845	chain elongation of O-linked mannose residue	biological_process	11	TRINITY_DN114027_c1_g3;TRINITY_DN92353_c1_g2	2	3857	3	25617	0.0611717
GO:0080187	floral organ senescence	biological_process	5	TRINITY_DN115825_c1_g1;TRINITY_DN121192_c0_g2	2	3857	3	25617	0.0611717
GO:0046028	electron transporter, transferring electrons from cytochrome b6/f complex of photosystem II activity	molecular_function	6	TRINITY_DN112786_c0_g1;TRINITY_DN94904_c0_g1	2	3857	3	25617	0.0611717
GO:0031415	NatA complex	cellular_component	7	TRINITY_DN110432_c2_g1;TRINITY_DN121301_c2_g5	2	3857	3	25617	0.0611717
GO:0019156	isoamylase activity	molecular_function	5	TRINITY_DN110847_c5_g4;TRINITY_DN117136_c1_g3	2	3857	3	25617	0.0611717
GO:0006475	internal protein amino acid acetylation	biological_process	11	TRINITY_DN110432_c2_g1;TRINITY_DN121301_c2_g5	2	3857	3	25617	0.0611717
GO:0000003	reproduction	biological_process	3	TRINITY_DN109559_c1_g1;TRINITY_DN122252_c2_g4	2	3857	3	25617	0.0611717
GO:1900101	regulation of endoplasmic reticulum unfolded protein response	biological_process	8	TRINITY_DN114027_c1_g3;TRINITY_DN92353_c1_g2	2	3857	3	25617	0.0611717
GO:1902074	response to salt	biological_process	5	TRINITY_DN109446_c0_g1;TRINITY_DN80889_c0_g1	2	3857	3	25617	0.0611717
GO:0017022	myosin binding	molecular_function	6	TRINITY_DN122786_c1_g1;TRINITY_DN123116_c0_g1	2	3857	3	25617	0.0611717
GO:0080093	regulation of photorespiration	biological_process	7	TRINITY_DN107914_c1_g2;TRINITY_DN113243_c0_g3	2	3857	3	25617	0.0611717
GO:0010606	positive regulation of cytoplasmic mRNA processing body assembly	biological_process	8	TRINITY_DN104030_c2_g2;TRINITY_DN115576_c0_g1	2	3857	3	25617	0.0611717
GO:0016122	xanthophyll metabolic process	biological_process	11	TRINITY_DN109127_c1_g1;TRINITY_DN113158_c0_g1	2	3857	3	25617	0.0611717
GO:0016295	myristoyl-[acyl-carrier-protein] hydrolase activity	molecular_function	9	TRINITY_DN110998_c0_g2;TRINITY_DN99076_c2_g1	2	3857	3	25617	0.0611717
GO:0030133	transport vesicle	cellular_component	7	TRINITY_DN122786_c1_g1;TRINITY_DN123116_c0_g1	2	3857	3	25617	0.0611717
GO:0035101	FACT complex	cellular_component	5	TRINITY_DN121115_c1_g1;TRINITY_DN97801_c1_g2	2	3857	3	25617	0.0611717
GO:0061504	cyclic threonylcarbamoyladenosine biosynthetic process	biological_process	13	TRINITY_DN104511_c0_g1;TRINITY_DN119180_c2_g1	2	3857	3	25617	0.0611717
GO:0080056	petal vascular tissue pattern formation	biological_process	7	TRINITY_DN96463_c1_g4;TRINITY_DN96463_c1_g5	2	3857	3	25617	0.0611717
GO:0050347	trans-octaprenyltranstransferase activity	molecular_function	6	TRINITY_DN120380_c1_g4;TRINITY_DN121013_c0_g2	2	3857	3	25617	0.0611717
GO:0071020	post-spliceosomal complex	cellular_component	7	TRINITY_DN106276_c0_g1;TRINITY_DN106276_c0_g2	2	3857	3	25617	0.0611717
GO:1990189	peptide-serine-N-acetyltransferase activity	molecular_function	11	TRINITY_DN110432_c2_g1;TRINITY_DN121301_c2_g5	2	3857	3	25617	0.0611717
GO:0061503	tRNA threonylcarbamoyladenosine dehydratase	molecular_function	7	TRINITY_DN104511_c0_g1;TRINITY_DN119180_c2_g1	2	3857	3	25617	0.0611717
GO:0009573	chloroplast ribulose bisphosphate carboxylase complex	cellular_component	8	TRINITY_DN102292_c2_g2;TRINITY_DN121114_c0_g1	2	3857	3	25617	0.0611717
GO:0009967	positive regulation of signal transduction	biological_process	8	TRINITY_DN112196_c0_g1;TRINITY_DN119936_c1_g1	2	3857	3	25617	0.0611717
GO:0000466	maturation of 5.8S rRNA from tricistronic rRNA transcript (SSU-rRNA, 5.8S rRNA, LSU-rRNA	biological_process	13	TRINITY_DN112483_c2_g1;TRINITY_DN122558_c1_g2	2	3857	3	25617	0.0611717
GO:0036258	multivesicular body assembly	biological_process	9	TRINITY_DN106752_c1_g1;TRINITY_DN108158_c1_g1	2	3857	3	25617	0.0611717
GO:0009743	response to carbohydrate	biological_process	6	TRINITY_DN124769_c1_g2;TRINITY_DN99151_c0_g1	2	3857	3	25617	0.0611717
GO:0005078	MAP-kinase scaffold activity	molecular_function	7	TRINITY_DN112196_c0_g1;TRINITY_DN119936_c1_g1	2	3857	3	25617	0.0611717
GO:0070860	RNA polymerase I core factor complex	cellular_component	8	TRINITY_DN100731_c0_g1;TRINITY_DN100731_c0_g2	2	3857	3	25617	0.0611717
GO:0001933	negative regulation of protein phosphorylation	biological_process	10	TRINITY_DN112578_c1_g1;TRINITY_DN90468_c0_g2	2	3857	3	25617	0.0611717
GO:0016730	oxidoreductase activity, acting on iron-sulfur proteins as donors	molecular_function	5	TRINITY_DN111940_c0_g1;TRINITY_DN111940_c0_g3	2	3857	3	25617	0.0611717
GO:1990190	peptide-glutamate-N-acetyltransferase activity	molecular_function	11	TRINITY_DN110432_c2_g1;TRINITY_DN121301_c2_g5	2	3857	3	25617	0.0611717
GO:0009790	embryo development	biological_process	5	TRINITY_DN110167_c0_g1;TRINITY_DN93708_c1_g1	2	3857	3	25617	0.0611717
GO:0031116	positive regulation of microtubule polymerization	biological_process	10	TRINITY_DN106755_c0_g1;TRINITY_DN97933_c0_g1	2	3857	3	25617	0.0611717
GO:0004360	glutamine-fructose-6-phosphate transaminase (isomerizing) activity	molecular_function	8	TRINITY_DN104471_c0_g1;TRINITY_DN112628_c2_g2	2	3857	3	25617	0.0611717
GO:0017198	N-terminal peptidyl-serine acetylation	biological_process	12	TRINITY_DN110432_c2_g1;TRINITY_DN121301_c2_g5	2	3857	3	25617	0.0611717
GO:0015267	channel activity	molecular_function	6	TRINITY_DN102177_c0_g1;TRINITY_DN112036_c0_g2	2	3857	3	25617	0.0611717
GO:0006104	succinyl-CoA metabolic process	biological_process	8	TRINITY_DN116126_c0_g2;TRINITY_DN99606_c2_g1	2	3857	3	25617	0.0611717
GO:0031998	regulation of fatty acid beta-oxidation	biological_process	8	TRINITY_DN107914_c1_g2;TRINITY_DN113243_c0_g3	2	3857	3	25617	0.0611717
GO:0016296	palmitoyl-[acyl-carrier-protein] hydrolase activity	molecular_function	9	TRINITY_DN110998_c0_g2;TRINITY_DN99076_c2_g1	2	3857	3	25617	0.0611717
GO:0016984	ribulose-bisphosphate carboxylase activity	molecular_function	7	TRINITY_DN102292_c2_g2;TRINITY_DN121114_c0_g1	2	3857	3	25617	0.0611717
GO:0031502	dolichyl-phosphate-mannose-protein mannosyltransferase complex	cellular_component	6	TRINITY_DN114027_c1_g3;TRINITY_DN92353_c1_g2	2	3857	3	25617	0.0611717
GO:0005854	nascent polypeptide-associated complex	cellular_component	4	TRINITY_DN101073_c3_g1;TRINITY_DN124332_c2_g4	2	3857	3	25617	0.0611717
GO:0005267	potassium channel activity	molecular_function	8	TRINITY_DN117565_c0_g2;TRINITY_DN94765_c4_g2	2	3857	3	25617	0.0611717
GO:0043207	response to external biotic stimulus	biological_process	5	TRINITY_DN121313_c1_g1;TRINITY_DN94717_c2_g1	2	3857	3	25617	0.0611717
GO:0052924	all-trans-nonaprenyl-diphosphate synthase (geranylgeranyl-diphosphate specific) activity	molecular_function	6	TRINITY_DN120380_c1_g4;TRINITY_DN121013_c0_g2	2	3857	3	25617	0.0611717
GO:0006105	succinate metabolic process	biological_process	6	TRINITY_DN116126_c0_g2;TRINITY_DN99606_c2_g1	2	3857	3	25617	0.0611717
GO:0080057	sepal vascular tissue pattern formation	biological_process	7	TRINITY_DN96463_c1_g4;TRINITY_DN96463_c1_g5	2	3857	3	25617	0.0611717
GO:2000014	regulation of endosperm development	biological_process	9	TRINITY_DN101877_c3_g1;TRINITY_DN109559_c1_g1	2	3857	3	25617	0.0611717
GO:0048441	petal development	biological_process	6	TRINITY_DN124769_c1_g2;TRINITY_DN99151_c0_g1	2	3857	3	25617	0.0611717
GO:0006750	glutathione biosynthetic process	biological_process	9	TRINITY_DN91254_c0_g1;TRINITY_DN99469_c2_g1	2	3857	3	25617	0.0611717
GO:0005739	mitochondrion	cellular_component	6	TRINITY_DN100034_c3_g2;TRINITY_DN100155_c0_g1;TRINITY_DN100350_c1_g3;TRINITY_DN100484_c1_g4;TRINITY_DN100507_c0_g2;TRINITY_DN100659_c1_g2;TRINITY_DN100774_c4_g1;TRINITY_DN100807_c0_g1;TRINITY_DN101036_c3_g1;TRINITY_DN101257_c1_g1;TRINITY_DN101261_c2_g1;TRINITY_DN101280_c1_g5;TRINITY_DN101385_c0_g1;TRINITY_DN101540_c0_g3;TRINITY_DN101809_c0_g1;TRINITY_DN102225_c0_g2;TRINITY_DN102624_c0_g1;TRINITY_…	303	3857	1856	25617	0.0612241
GO:0008692	3-hydroxybutyryl-CoA epimerase activity	molecular_function	7	TRINITY_DN104476_c1_g1;TRINITY_DN109086_c1_g1;TRINITY_DN110768_c0_g3;TRINITY_DN124883_c5_g1;TRINITY_DN79651_c0_g1	5	3857	15	25617	0.0624973
GO:0003746	translation elongation factor activity	molecular_function	8	TRINITY_DN105447_c0_g1;TRINITY_DN107140_c1_g1;TRINITY_DN110270_c0_g3;TRINITY_DN117311_c0_g1;TRINITY_DN117311_c0_g2;TRINITY_DN118540_c0_g1;TRINITY_DN119360_c2_g2;TRINITY_DN119777_c1_g1;TRINITY_DN119777_c1_g3;TRINITY_DN122079_c0_g1;TRINITY_DN123072_c3_g2;TRINITY_DN88817_c0_g1;TRINITY_DN93297_c5_g3;TRINITY_DN94377_c2_g4;TRINITY_DN95146_c0_g1;TRINITY_DN96407_c0_g5;TRINITY_DN97488_c0_g1;TRINITY_DN9917…	19	3857	88	25617	0.0633593
GO:0009733	response to auxin	biological_process	6	TRINITY_DN100711_c2_g1;TRINITY_DN101799_c1_g4;TRINITY_DN102960_c2_g1;TRINITY_DN104042_c0_g2;TRINITY_DN104740_c4_g2;TRINITY_DN106132_c4_g2;TRINITY_DN106503_c0_g2;TRINITY_DN106732_c0_g1;TRINITY_DN108191_c3_g2;TRINITY_DN109327_c0_g1;TRINITY_DN109489_c2_g3;TRINITY_DN109538_c0_g1;TRINITY_DN111345_c1_g1;TRINITY_DN111571_c0_g1;TRINITY_DN111589_c0_g1;TRINITY_DN112622_c0_g1;TRINITY_DN112953_c1_g2;TRINITY_…	39	3857	204	25617	0.0662814
GO:0009414	response to water deprivation	biological_process	5	TRINITY_DN101261_c2_g1;TRINITY_DN101350_c0_g1;TRINITY_DN102263_c4_g2;TRINITY_DN102639_c1_g1;TRINITY_DN103342_c0_g1;TRINITY_DN104253_c2_g1;TRINITY_DN104655_c1_g1;TRINITY_DN105685_c2_g1;TRINITY_DN107510_c1_g2;TRINITY_DN107597_c2_g1;TRINITY_DN107900_c1_g1;TRINITY_DN108425_c0_g1;TRINITY_DN108723_c0_g3;TRINITY_DN109048_c0_g1;TRINITY_DN109415_c1_g1;TRINITY_DN109436_c0_g1;TRINITY_DN109572_c0_g1;TRINITY_…	62	3857	342	25617	0.066425
GO:0051537	2 iron, 2 sulfur cluster binding	molecular_function	6	TRINITY_DN103573_c1_g2;TRINITY_DN104970_c0_g1;TRINITY_DN110448_c1_g1;TRINITY_DN111509_c2_g1;TRINITY_DN115888_c1_g1;TRINITY_DN115892_c0_g1;TRINITY_DN119693_c0_g3;TRINITY_DN120542_c1_g4;TRINITY_DN91062_c0_g1;TRINITY_DN94904_c0_g1;TRINITY_DN95312_c3_g1	11	3857	45	25617	0.0664295
GO:0031409	pigment binding	molecular_function	4	TRINITY_DN100614_c1_g6;TRINITY_DN101076_c1_g1;TRINITY_DN108301_c0_g1;TRINITY_DN108301_c1_g1;TRINITY_DN108301_c1_g3;TRINITY_DN108301_c1_g4;TRINITY_DN108301_c1_g6;TRINITY_DN109783_c4_g1;TRINITY_DN110381_c1_g3;TRINITY_DN112873_c1_g3;TRINITY_DN116485_c1_g1;TRINITY_DN116485_c1_g3;TRINITY_DN121141_c3_g1;TRINITY_DN99560_c0_g1	14	3857	61	25617	0.0665298
GO:0031122	cytoplasmic microtubule organization	biological_process	8	TRINITY_DN108560_c0_g1;TRINITY_DN110658_c1_g1;TRINITY_DN114082_c0_g2;TRINITY_DN119108_c0_g1;TRINITY_DN119398_c5_g1;TRINITY_DN119893_c2_g1;TRINITY_DN121213_c0_g3;TRINITY_DN124407_c3_g1;TRINITY_DN124836_c2_g1;TRINITY_DN94268_c0_g1	10	3857	40	25617	0.0684787
GO:0007568	aging	biological_process	4	TRINITY_DN110138_c0_g1;TRINITY_DN119985_c3_g1;TRINITY_DN122482_c0_g2;TRINITY_DN122636_c0_g2;TRINITY_DN91356_c0_g1;TRINITY_DN96387_c0_g1;TRINITY_DN96799_c1_g1;TRINITY_DN97193_c0_g1;TRINITY_DN98370_c2_g3;TRINITY_DN98544_c0_g2	10	3857	40	25617	0.0684787
GO:0016226	iron-sulfur cluster assembly	biological_process	6	TRINITY_DN105756_c0_g2;TRINITY_DN108561_c0_g2;TRINITY_DN113102_c1_g1;TRINITY_DN117330_c1_g3;TRINITY_DN117686_c1_g1;TRINITY_DN119693_c0_g3;TRINITY_DN122462_c2_g1;TRINITY_DN92633_c1_g1;TRINITY_DN95312_c3_g1;TRINITY_DN99789_c0_g1	10	3857	40	25617	0.0684787
GO:0009524	phragmoplast	cellular_component	6	TRINITY_DN105055_c6_g2;TRINITY_DN106755_c0_g1;TRINITY_DN109564_c3_g2;TRINITY_DN109584_c2_g1;TRINITY_DN109584_c2_g2;TRINITY_DN111669_c0_g2;TRINITY_DN113497_c1_g4;TRINITY_DN113497_c1_g5;TRINITY_DN113885_c1_g1;TRINITY_DN113975_c0_g5;TRINITY_DN114435_c1_g2;TRINITY_DN114448_c1_g5;TRINITY_DN116198_c0_g1;TRINITY_DN117976_c0_g5;TRINITY_DN118461_c1_g5;TRINITY_DN119544_c1_g1;TRINITY_DN120923_c1_g1;TRINITY_…	25	3857	123	25617	0.069383
GO:0005685	U1 snRNP	cellular_component	8	TRINITY_DN102733_c1_g2;TRINITY_DN107453_c1_g1;TRINITY_DN114084_c1_g1;TRINITY_DN114084_c1_g2;TRINITY_DN114313_c0_g3;TRINITY_DN116334_c1_g1;TRINITY_DN124784_c2_g1;TRINITY_DN125022_c3_g1;TRINITY_DN88458_c0_g3	9	3857	35	25617	0.0700778
GO:0046540	U4/U6 x U5 tri-snRNP complex	cellular_component	9	TRINITY_DN100755_c0_g1;TRINITY_DN101199_c4_g4;TRINITY_DN101977_c0_g4;TRINITY_DN113949_c1_g1;TRINITY_DN120082_c3_g3;TRINITY_DN122548_c1_g1;TRINITY_DN122548_c2_g1;TRINITY_DN122548_c2_g5;TRINITY_DN86610_c0_g1	9	3857	35	25617	0.0700778
GO:0000381	regulation of alternative mRNA splicing, via spliceosome	biological_process	10	TRINITY_DN112889_c0_g1;TRINITY_DN91725_c0_g1;TRINITY_DN92057_c1_g1;TRINITY_DN98326_c0_g1	4	3857	11	25617	0.0702112
GO:0031011	Ino80 complex	cellular_component	6	TRINITY_DN117774_c2_g1;TRINITY_DN119171_c0_g1;TRINITY_DN122799_c1_g1;TRINITY_DN124281_c1_g1	4	3857	11	25617	0.0702112
GO:0004435	phosphatidylinositol phospholipase C activity	molecular_function	9	TRINITY_DN102495_c0_g2;TRINITY_DN110904_c0_g2;TRINITY_DN120151_c0_g1;TRINITY_DN124846_c5_g6	4	3857	11	25617	0.0702112
GO:0009704	de-etiolation	biological_process	7	TRINITY_DN101799_c1_g4;TRINITY_DN103342_c0_g1;TRINITY_DN111166_c3_g1;TRINITY_DN117904_c1_g1	4	3857	11	25617	0.0702112
GO:0006426	glycyl-tRNA aminoacylation	biological_process	13	TRINITY_DN109029_c1_g2;TRINITY_DN116243_c3_g2;TRINITY_DN119637_c2_g1;TRINITY_DN123317_c1_g2	4	3857	11	25617	0.0702112
GO:0009854	oxidative photosynthetic carbon pathway	biological_process	6	TRINITY_DN115549_c0_g1;TRINITY_DN118104_c2_g3;TRINITY_DN97655_c1_g1;TRINITY_DN97655_c1_g2	4	3857	11	25617	0.0702112
GO:0017070	U6 snRNA binding	molecular_function	8	TRINITY_DN113277_c3_g2;TRINITY_DN120082_c3_g3;TRINITY_DN125162_c2_g1;TRINITY_DN99001_c0_g1	4	3857	11	25617	0.0702112
GO:0051781	positive regulation of cell division	biological_process	7	TRINITY_DN108444_c1_g1;TRINITY_DN111669_c0_g2;TRINITY_DN113708_c0_g1;TRINITY_DN118461_c1_g5	4	3857	11	25617	0.0702112
GO:0052691	UDP-arabinopyranose mutase activity	molecular_function	6	TRINITY_DN113747_c1_g2;TRINITY_DN89117_c0_g1;TRINITY_DN91095_c2_g2;TRINITY_DN91095_c2_g5	4	3857	11	25617	0.0702112
GO:0050829	defense response to Gram-negative bacterium	biological_process	9	TRINITY_DN118937_c1_g1;TRINITY_DN119087_c0_g1;TRINITY_DN122636_c0_g2;TRINITY_DN96799_c1_g1	4	3857	11	25617	0.0702112
GO:0009904	chloroplast accumulation movement	biological_process	9	TRINITY_DN100376_c0_g1;TRINITY_DN114347_c0_g1;TRINITY_DN117668_c0_g1;TRINITY_DN120361_c1_g1	4	3857	11	25617	0.0702112
GO:0004820	glycine-tRNA ligase activity	molecular_function	7	TRINITY_DN109029_c1_g2;TRINITY_DN116243_c3_g2;TRINITY_DN119637_c2_g1;TRINITY_DN123317_c1_g2	4	3857	11	25617	0.0702112
GO:0051568	histone H3-K4 methylation	biological_process	13	TRINITY_DN100731_c0_g1;TRINITY_DN100731_c0_g2;TRINITY_DN118150_c1_g1;TRINITY_DN118257_c0_g1	4	3857	11	25617	0.0702112
GO:0043622	cortical microtubule organization	biological_process	8	TRINITY_DN102228_c0_g2;TRINITY_DN111669_c0_g2;TRINITY_DN114045_c0_g3;TRINITY_DN118461_c1_g5;TRINITY_DN119783_c3_g2;TRINITY_DN98368_c2_g1;TRINITY_DN99797_c3_g1	7	3857	25	25617	0.0705977
GO:0004430	1-phosphatidylinositol 4-kinase activity	molecular_function	8	TRINITY_DN113921_c0_g2;TRINITY_DN114673_c1_g1;TRINITY_DN115854_c0_g1;TRINITY_DN118302_c1_g1;TRINITY_DN121752_c0_g3;TRINITY_DN122899_c1_g4;TRINITY_DN80889_c0_g1	7	3857	25	25617	0.0705977
GO:0008234	cysteine-type peptidase activity	molecular_function	7	TRINITY_DN101516_c0_g1;TRINITY_DN103540_c0_g1;TRINITY_DN110501_c5_g1;TRINITY_DN121529_c13_g1;TRINITY_DN121529_c14_g1;TRINITY_DN97624_c8_g1;TRINITY_DN97624_c8_g2;TRINITY_DN97624_c8_g4	8	3857	30	25617	0.0709396
GO:0048573	photoperiodism, flowering	biological_process	8	TRINITY_DN104696_c0_g1;TRINITY_DN105038_c0_g2;TRINITY_DN109166_c2_g2;TRINITY_DN115997_c1_g1;TRINITY_DN116456_c0_g1;TRINITY_DN119253_c1_g1;TRINITY_DN120747_c0_g3;TRINITY_DN122999_c0_g2	8	3857	30	25617	0.0709396
GO:0035091	phosphatidylinositol binding	molecular_function	6	TRINITY_DN100807_c0_g1;TRINITY_DN101719_c1_g5;TRINITY_DN102960_c2_g1;TRINITY_DN104005_c3_g1;TRINITY_DN105981_c0_g1;TRINITY_DN106302_c1_g1;TRINITY_DN106752_c1_g1;TRINITY_DN107603_c1_g3;TRINITY_DN108158_c1_g1;TRINITY_DN110063_c0_g1;TRINITY_DN113659_c2_g3;TRINITY_DN115266_c2_g1;TRINITY_DN116162_c0_g1;TRINITY_DN117688_c0_g2;TRINITY_DN117885_c0_g1;TRINITY_DN122698_c4_g1;TRINITY_DN124508_c1_g3;TRINITY_…	20	3857	95	25617	0.0720882
GO:0042802	identical protein binding	molecular_function	5	TRINITY_DN100711_c2_g1;TRINITY_DN103540_c0_g1;TRINITY_DN106732_c0_g1;TRINITY_DN108191_c3_g2;TRINITY_DN108767_c0_g2;TRINITY_DN108870_c0_g1;TRINITY_DN109580_c1_g1;TRINITY_DN109657_c0_g1;TRINITY_DN111319_c2_g2;TRINITY_DN111940_c0_g1;TRINITY_DN111940_c0_g3;TRINITY_DN112242_c0_g2;TRINITY_DN113042_c3_g1;TRINITY_DN114159_c1_g1;TRINITY_DN114159_c1_g2;TRINITY_DN116222_c0_g1;TRINITY_DN116388_c0_g2;TRINITY_…	34	3857	176	25617	0.0727098
GO:0010262	somatic embryogenesis	biological_process	6	TRINITY_DN111093_c1_g1;TRINITY_DN120189_c1_g1;TRINITY_DN120189_c1_g2	3	3857	7	25617	0.074436
GO:0103073	anandamide amidohydrolase activity	molecular_function	7	TRINITY_DN112957_c1_g1;TRINITY_DN118455_c0_g1;TRINITY_DN95698_c1_g2	3	3857	7	25617	0.074436
GO:0102077	oleamide hydrolase activity	molecular_function	7	TRINITY_DN112957_c1_g1;TRINITY_DN118455_c0_g1;TRINITY_DN95698_c1_g2	3	3857	7	25617	0.074436
GO:0071461	cellular response to redox state	biological_process	5	TRINITY_DN110921_c0_g1;TRINITY_DN94715_c0_g1;TRINITY_DN99667_c0_g1	3	3857	7	25617	0.074436
GO:0047412	N-(long-chain-acyl)ethanolamine deacylase activity	molecular_function	7	TRINITY_DN112957_c1_g1;TRINITY_DN118455_c0_g1;TRINITY_DN95698_c1_g2	3	3857	7	25617	0.074436
GO:0035198	miRNA binding	molecular_function	8	TRINITY_DN111345_c1_g1;TRINITY_DN124769_c1_g2;TRINITY_DN99151_c0_g1	3	3857	7	25617	0.074436
GO:0042549	photosystem II stabilization	biological_process	9	TRINITY_DN104970_c0_g1;TRINITY_DN111847_c1_g5;TRINITY_DN99724_c0_g5	3	3857	7	25617	0.074436
GO:0010239	chloroplast mRNA processing	biological_process	11	TRINITY_DN111962_c1_g1;TRINITY_DN112868_c0_g2;TRINITY_DN123186_c2_g1	3	3857	7	25617	0.074436
GO:0010445	nuclear dicing body	cellular_component	8	TRINITY_DN112889_c0_g1;TRINITY_DN113672_c1_g4;TRINITY_DN118722_c1_g1	3	3857	7	25617	0.074436
GO:0004629	phospholipase C activity	molecular_function	8	TRINITY_DN102495_c0_g2;TRINITY_DN110904_c0_g2;TRINITY_DN124846_c5_g6	3	3857	7	25617	0.074436
GO:0010007	magnesium chelatase complex	cellular_component	8	TRINITY_DN114898_c1_g2;TRINITY_DN122797_c1_g2;TRINITY_DN124287_c4_g1	3	3857	7	25617	0.074436
GO:0015098	molybdate ion transmembrane transporter activity	molecular_function	8	TRINITY_DN105841_c1_g2;TRINITY_DN118887_c0_g1;TRINITY_DN119676_c0_g1	3	3857	7	25617	0.074436
GO:0070291	N-acylethanolamine metabolic process	biological_process	7	TRINITY_DN112957_c1_g1;TRINITY_DN118455_c0_g1;TRINITY_DN95698_c1_g2	3	3857	7	25617	0.074436
GO:0007389	pattern specification process	biological_process	4	TRINITY_DN111345_c1_g1;TRINITY_DN124769_c1_g2;TRINITY_DN99151_c0_g1	3	3857	7	25617	0.074436
GO:0009939	positive regulation of gibberellic acid mediated signaling pathway	biological_process	9	TRINITY_DN117565_c0_g2;TRINITY_DN83315_c0_g1;TRINITY_DN91846_c1_g1	3	3857	7	25617	0.074436
GO:0015689	molybdate ion transport	biological_process	9	TRINITY_DN105841_c1_g2;TRINITY_DN118887_c0_g1;TRINITY_DN119676_c0_g1	3	3857	7	25617	0.074436
GO:0050684	regulation of mRNA processing	biological_process	8	TRINITY_DN119777_c1_g1;TRINITY_DN119777_c1_g3;TRINITY_DN120724_c1_g1	3	3857	7	25617	0.074436
GO:0000813	ESCRT I complex	cellular_component	5	TRINITY_DN106752_c1_g1;TRINITY_DN108158_c1_g1;TRINITY_DN117108_c0_g1	3	3857	7	25617	0.074436
GO:0004784	superoxide dismutase activity	molecular_function	4	TRINITY_DN116282_c3_g1;TRINITY_DN123102_c0_g2;TRINITY_DN96068_c0_g2	3	3857	7	25617	0.074436
GO:0047100	glyceraldehyde-3-phosphate dehydrogenase (NADP+) (phosphorylating) activity	molecular_function	8	TRINITY_DN110094_c3_g2;TRINITY_DN124132_c2_g2;TRINITY_DN98759_c5_g2	3	3857	7	25617	0.074436
GO:0004386	helicase activity	molecular_function	9	TRINITY_DN101224_c0_g1;TRINITY_DN110612_c0_g2;TRINITY_DN112824_c0_g1;TRINITY_DN113965_c0_g1;TRINITY_DN114539_c1_g2;TRINITY_DN115189_c2_g1;TRINITY_DN116194_c0_g2;TRINITY_DN116788_c3_g1;TRINITY_DN119959_c1_g1;TRINITY_DN120249_c2_g3;TRINITY_DN122399_c0_g2;TRINITY_DN124388_c5_g2;TRINITY_DN124903_c2_g1;TRINITY_DN93469_c0_g2	14	3857	62	25617	0.0745278
GO:0008283	cell proliferation	biological_process	3	TRINITY_DN103491_c0_g3;TRINITY_DN109374_c1_g2;TRINITY_DN112104_c0_g4;TRINITY_DN114034_c0_g1;TRINITY_DN115469_c2_g1;TRINITY_DN116788_c3_g1;TRINITY_DN120626_c2_g1;TRINITY_DN123893_c4_g1;TRINITY_DN95051_c4_g4;TRINITY_DN98023_c0_g1;TRINITY_DN99684_c0_g1	11	3857	46	25617	0.0759312
GO:0006364	rRNA processing	biological_process	11	TRINITY_DN102379_c0_g1;TRINITY_DN107299_c0_g2;TRINITY_DN112938_c7_g6;TRINITY_DN113424_c0_g1;TRINITY_DN115014_c0_g1;TRINITY_DN115917_c0_g1;TRINITY_DN115917_c0_g3;TRINITY_DN122569_c0_g2;TRINITY_DN123404_c1_g3;TRINITY_DN123874_c2_g1;TRINITY_DN81848_c0_g1;TRINITY_DN90788_c0_g1;TRINITY_DN92388_c0_g2;TRINITY_DN96463_c1_g4;TRINITY_DN96463_c1_g5;TRINITY_DN97445_c1_g1;TRINITY_DN99931_c2_g2	17	3857	79	25617	0.0779327
GO:0003743	translation initiation factor activity	molecular_function	8	TRINITY_DN101066_c0_g1;TRINITY_DN104701_c0_g7;TRINITY_DN105203_c1_g4;TRINITY_DN107442_c0_g1;TRINITY_DN108858_c0_g1;TRINITY_DN109319_c0_g7;TRINITY_DN109577_c1_g1;TRINITY_DN115422_c0_g3;TRINITY_DN115429_c1_g1;TRINITY_DN115735_c0_g2;TRINITY_DN115852_c2_g4;TRINITY_DN115948_c0_g1;TRINITY_DN116109_c0_g1;TRINITY_DN121834_c0_g1;TRINITY_DN121834_c1_g1;TRINITY_DN123263_c2_g1;TRINITY_DN87386_c2_g1;TRINITY_D…	23	3857	113	25617	0.0779484
GO:0003906	DNA-(apurinic or apyrimidinic site) lyase activity	molecular_function	5	TRINITY_DN112564_c2_g2;TRINITY_DN113173_c0_g3;TRINITY_DN124518_c1_g1;TRINITY_DN124518_c2_g1;TRINITY_DN92978_c0_g7	5	3857	16	25617	0.0800356
GO:0003951	NAD+ kinase activity	molecular_function	7	TRINITY_DN102624_c0_g1;TRINITY_DN109434_c0_g2;TRINITY_DN110146_c0_g4;TRINITY_DN120041_c1_g1;TRINITY_DN94627_c5_g1	5	3857	16	25617	0.0800356
GO:0009903	chloroplast avoidance movement	biological_process	9	TRINITY_DN100376_c0_g1;TRINITY_DN114347_c0_g1;TRINITY_DN117668_c0_g1;TRINITY_DN120361_c1_g1;TRINITY_DN122362_c0_g1	5	3857	16	25617	0.0800356
GO:0061025	membrane fusion	biological_process	6	TRINITY_DN103999_c2_g1;TRINITY_DN107828_c0_g1;TRINITY_DN107828_c1_g2;TRINITY_DN123561_c3_g3;TRINITY_DN95911_c2_g1	5	3857	16	25617	0.0800356
GO:0009011	starch synthase activity	molecular_function	8	TRINITY_DN101483_c0_g1;TRINITY_DN101483_c1_g2;TRINITY_DN113282_c1_g1;TRINITY_DN121965_c0_g2;TRINITY_DN122035_c0_g1	5	3857	16	25617	0.0800356
GO:0046856	phosphatidylinositol dephosphorylation	biological_process	10	TRINITY_DN107468_c0_g1;TRINITY_DN114455_c4_g1;TRINITY_DN115169_c0_g1;TRINITY_DN92964_c0_g2;TRINITY_DN99505_c5_g2	5	3857	16	25617	0.0800356
GO:0019104	DNA N-glycosylase activity	molecular_function	7	TRINITY_DN112564_c2_g2;TRINITY_DN113173_c0_g3;TRINITY_DN124518_c1_g1;TRINITY_DN124518_c2_g1;TRINITY_DN92978_c0_g7	5	3857	16	25617	0.0800356
GO:0000470	maturation of LSU-rRNA	biological_process	12	TRINITY_DN102026_c0_g1;TRINITY_DN112288_c1_g2;TRINITY_DN112673_c0_g3;TRINITY_DN115585_c0_g5;TRINITY_DN116894_c4_g1;TRINITY_DN118678_c0_g1;TRINITY_DN91335_c0_g2;TRINITY_DN92899_c2_g1	8	3857	31	25617	0.0835344
GO:0016592	mediator complex	cellular_component	4	TRINITY_DN107360_c0_g1;TRINITY_DN107972_c0_g1;TRINITY_DN115354_c1_g2;TRINITY_DN116616_c1_g2;TRINITY_DN117654_c0_g1;TRINITY_DN119022_c2_g1;TRINITY_DN124828_c6_g1;TRINITY_DN125072_c5_g1	8	3857	31	25617	0.0835344
GO:0042651	thylakoid membrane	cellular_component	5	TRINITY_DN101445_c1_g1;TRINITY_DN111509_c2_g1;TRINITY_DN116173_c1_g1;TRINITY_DN119130_c0_g3;TRINITY_DN120601_c1_g2;TRINITY_DN123186_c2_g1	6	3857	21	25617	0.0838738
GO:0016207	4-coumarate-CoA ligase activity	molecular_function	7	TRINITY_DN108337_c0_g1;TRINITY_DN108629_c0_g1;TRINITY_DN111205_c2_g2;TRINITY_DN115491_c0_g4;TRINITY_DN122193_c0_g2;TRINITY_DN124687_c1_g1	6	3857	21	25617	0.0838738
GO:0008553	proton-exporting ATPase activity, phosphorylative mechanism	molecular_function	10	TRINITY_DN106142_c1_g2;TRINITY_DN106671_c1_g2;TRINITY_DN111841_c0_g1;TRINITY_DN117245_c1_g4;TRINITY_DN123809_c2_g2;TRINITY_DN97985_c0_g1;TRINITY_DN99053_c1_g1	7	3857	26	25617	0.0845769
GO:0071258	cellular response to gravity	biological_process	6	TRINITY_DN106319_c0_g1;TRINITY_DN115652_c0_g1;TRINITY_DN119026_c1_g1;TRINITY_DN120777_c7_g3;TRINITY_DN122036_c3_g3;TRINITY_DN88823_c1_g1;TRINITY_DN98083_c1_g3	7	3857	26	25617	0.0845769
GO:0009504	cell plate	cellular_component	6	TRINITY_DN102228_c0_g2;TRINITY_DN108579_c0_g2;TRINITY_DN113885_c1_g1;TRINITY_DN114045_c0_g3;TRINITY_DN119783_c3_g2;TRINITY_DN98216_c1_g3;TRINITY_DN98368_c2_g1	7	3857	26	25617	0.0845769
GO:0042393	histone binding	molecular_function	5	TRINITY_DN102402_c0_g1;TRINITY_DN110501_c5_g1;TRINITY_DN112104_c0_g4;TRINITY_DN113042_c3_g1;TRINITY_DN114530_c0_g1;TRINITY_DN115469_c2_g1;TRINITY_DN119777_c1_g1;TRINITY_DN119777_c1_g3;TRINITY_DN120626_c2_g1;TRINITY_DN122410_c1_g1;TRINITY_DN122706_c3_g1;TRINITY_DN92149_c2_g2;TRINITY_DN95051_c4_g4;TRINITY_DN97801_c1_g2;TRINITY_DN98078_c4_g1;TRINITY_DN98712_c0_g1	16	3857	75	25617	0.0908255
GO:0031053	primary miRNA processing	biological_process	11	TRINITY_DN106099_c0_g1;TRINITY_DN112889_c0_g1;TRINITY_DN113672_c1_g4;TRINITY_DN118722_c1_g1	4	3857	12	25617	0.0931885
GO:0000244	spliceosomal tri-snRNP complex assembly	biological_process	10	TRINITY_DN101199_c4_g4;TRINITY_DN113949_c1_g1;TRINITY_DN117601_c1_g2;TRINITY_DN125162_c2_g1	4	3857	12	25617	0.0931885
GO:0004017	adenylate kinase activity	molecular_function	8	TRINITY_DN102531_c0_g1;TRINITY_DN102923_c1_g1;TRINITY_DN123100_c2_g1;TRINITY_DN94329_c0_g1	4	3857	12	25617	0.0931885
GO:0045271	respiratory chain complex I	cellular_component	6	TRINITY_DN100155_c0_g1;TRINITY_DN103620_c0_g1;TRINITY_DN108767_c0_g2;TRINITY_DN99157_c0_g1	4	3857	12	25617	0.0931885
GO:0006301	postreplication repair	biological_process	9	TRINITY_DN102474_c1_g1;TRINITY_DN115969_c1_g4;TRINITY_DN115969_c1_g5;TRINITY_DN96678_c0_g1	4	3857	12	25617	0.0931885
GO:0008097	5S rRNA binding	molecular_function	8	TRINITY_DN108757_c1_g1;TRINITY_DN109819_c1_g2;TRINITY_DN109819_c1_g5;TRINITY_DN93569_c1_g1	4	3857	12	25617	0.0931885
GO:0070469	respiratory chain	cellular_component	4	TRINITY_DN110593_c1_g1;TRINITY_DN113472_c1_g2;TRINITY_DN114146_c0_g1;TRINITY_DN119082_c0_g1	4	3857	12	25617	0.0931885
GO:0004739	pyruvate dehydrogenase (acetyl-transferring) activity	molecular_function	7	TRINITY_DN105094_c1_g2;TRINITY_DN112016_c0_g1;TRINITY_DN112016_c0_g2;TRINITY_DN117128_c0_g1	4	3857	12	25617	0.0931885
GO:0005782	peroxisomal matrix	cellular_component	8	TRINITY_DN107770_c2_g1;TRINITY_DN108815_c1_g1;TRINITY_DN120291_c1_g2;TRINITY_DN94519_c2_g2	4	3857	12	25617	0.0931885
GO:0006260	DNA replication	biological_process	8	TRINITY_DN115135_c0_g1;TRINITY_DN116997_c5_g1;TRINITY_DN120569_c0_g2;TRINITY_DN121115_c1_g1;TRINITY_DN121650_c1_g1;TRINITY_DN122252_c2_g4;TRINITY_DN122535_c2_g2;TRINITY_DN97801_c1_g2;TRINITY_DN98915_c0_g1	9	3857	37	25617	0.0939557
GO:0009753	response to jasmonic acid	biological_process	6	TRINITY_DN100401_c0_g1;TRINITY_DN100711_c2_g1;TRINITY_DN107240_c0_g1;TRINITY_DN109327_c0_g1;TRINITY_DN110654_c1_g2;TRINITY_DN111696_c1_g1;TRINITY_DN112001_c0_g1;TRINITY_DN112423_c0_g2;TRINITY_DN114786_c1_g2;TRINITY_DN115299_c0_g1;TRINITY_DN115997_c1_g1;TRINITY_DN117926_c0_g1;TRINITY_DN119970_c1_g3;TRINITY_DN120461_c1_g1;TRINITY_DN122999_c0_g2;TRINITY_DN123851_c2_g4;TRINITY_DN123937_c2_g1;TRINITY_…	26	3857	133	25617	0.0945765
GO:0009862	systemic acquired resistance, salicylic acid mediated signaling pathway	biological_process	6	TRINITY_DN102442_c1_g1;TRINITY_DN107240_c0_g1;TRINITY_DN108297_c1_g2;TRINITY_DN108414_c0_g1;TRINITY_DN111421_c1_g1;TRINITY_DN114045_c0_g3;TRINITY_DN121291_c1_g1;TRINITY_DN98654_c2_g1	8	3857	32	25617	0.0973553
GO:0009506	plasmodesma	cellular_component	5	TRINITY_DN100382_c0_g1;TRINITY_DN100706_c2_g1;TRINITY_DN100749_c0_g1;TRINITY_DN101261_c2_g1;TRINITY_DN101829_c0_g1;TRINITY_DN102026_c0_g1;TRINITY_DN102610_c2_g3;TRINITY_DN103259_c0_g2;TRINITY_DN103540_c0_g1;TRINITY_DN103589_c1_g3;TRINITY_DN103842_c3_g1;TRINITY_DN104021_c0_g1;TRINITY_DN104476_c1_g1;TRINITY_DN104531_c0_g1;TRINITY_DN104588_c0_g2;TRINITY_DN104655_c1_g1;TRINITY_DN104870_c0_g1;TRINITY_…	184	3857	1118	25617	0.098282
GO:0000902	cell morphogenesis	biological_process	6	TRINITY_DN103233_c0_g2;TRINITY_DN117403_c0_g1;TRINITY_DN121816_c2_g1;TRINITY_DN122792_c2_g2;TRINITY_DN123783_c0_g1	5	3857	17	25617	0.0999015
GO:0000460	maturation of 5.8S rRNA	biological_process	12	TRINITY_DN102026_c0_g1;TRINITY_DN112673_c0_g3;TRINITY_DN116894_c4_g1;TRINITY_DN122464_c2_g1;TRINITY_DN92899_c2_g1	5	3857	17	25617	0.0999015
GO:0010014	meristem initiation	biological_process	4	TRINITY_DN100608_c0_g1;TRINITY_DN111589_c0_g1;TRINITY_DN116772_c1_g3;TRINITY_DN121689_c0_g2;TRINITY_DN122682_c1_g2	5	3857	17	25617	0.0999015
GO:0071014	post-mRNA release spliceosomal complex	cellular_component	7	TRINITY_DN106276_c0_g1;TRINITY_DN106276_c0_g2;TRINITY_DN112647_c1_g2;TRINITY_DN121847_c0_g1;TRINITY_DN124536_c2_g1	5	3857	17	25617	0.0999015
GO:0000038	very long-chain fatty acid metabolic process	biological_process	10	TRINITY_DN102874_c0_g1;TRINITY_DN103442_c0_g1;TRINITY_DN120020_c2_g1;TRINITY_DN123316_c2_g1;TRINITY_DN90771_c0_g1	5	3857	17	25617	0.0999015
GO:0005938	cell cortex	cellular_component	7	TRINITY_DN106927_c3_g3;TRINITY_DN111669_c0_g2;TRINITY_DN113885_c1_g1;TRINITY_DN118461_c1_g5;TRINITY_DN123783_c0_g1	5	3857	17	25617	0.0999015
GO:0030686	90S preribosome	cellular_component	6	TRINITY_DN104869_c3_g1;TRINITY_DN104869_c3_g3;TRINITY_DN112938_c7_g6;TRINITY_DN118678_c0_g1;TRINITY_DN121102_c1_g1;TRINITY_DN121102_c1_g2;TRINITY_DN91335_c0_g2	7	3857	27	25617	0.100016
GO:0048366	leaf development	biological_process	7	TRINITY_DN103491_c0_g3;TRINITY_DN109489_c2_g3;TRINITY_DN110349_c1_g5;TRINITY_DN113603_c2_g2;TRINITY_DN114530_c0_g1;TRINITY_DN115948_c0_g1;TRINITY_DN121797_c0_g1;TRINITY_DN121827_c3_g1;TRINITY_DN122933_c1_g3;TRINITY_DN123071_c2_g1;TRINITY_DN123893_c4_g1;TRINITY_DN123947_c3_g1;TRINITY_DN124005_c3_g1;TRINITY_DN124769_c1_g2;TRINITY_DN88092_c0_g1;TRINITY_DN89012_c0_g1;TRINITY_DN96463_c1_g4;TRINITY_DN9…	20	3857	99	25617	0.100947
GO:0000156	phosphorelay response regulator activity	molecular_function	4	TRINITY_DN108191_c3_g2;TRINITY_DN109153_c0_g3;TRINITY_DN109955_c0_g1;TRINITY_DN119458_c2_g4;TRINITY_DN121349_c0_g1;TRINITY_DN88414_c0_g2	6	3857	22	25617	0.101284
GO:0051301	cell division	biological_process	4	TRINITY_DN100711_c2_g1;TRINITY_DN102355_c0_g2;TRINITY_DN105055_c6_g2;TRINITY_DN108149_c0_g3;TRINITY_DN108191_c3_g2;TRINITY_DN109564_c3_g2;TRINITY_DN110445_c0_g2;TRINITY_DN110535_c3_g4;TRINITY_DN111345_c1_g1;TRINITY_DN111669_c0_g2;TRINITY_DN112953_c1_g2;TRINITY_DN113175_c1_g1;TRINITY_DN113497_c1_g4;TRINITY_DN113497_c1_g5;TRINITY_DN113708_c0_g1;TRINITY_DN113885_c1_g1;TRINITY_DN114435_c1_g2;TRINITY_…	40	3857	218	25617	0.104095
GO:0046982	protein heterodimerization activity	molecular_function	6	TRINITY_DN100374_c0_g1;TRINITY_DN102402_c0_g1;TRINITY_DN103223_c6_g2;TRINITY_DN105060_c2_g1;TRINITY_DN108579_c0_g2;TRINITY_DN108966_c1_g4;TRINITY_DN114913_c1_g1;TRINITY_DN115943_c1_g1;TRINITY_DN118229_c7_g1;TRINITY_DN120570_c2_g1;TRINITY_DN121049_c2_g1;TRINITY_DN122933_c1_g3;TRINITY_DN89402_c2_g2;TRINITY_DN93651_c0_g1;TRINITY_DN94488_c0_g1;TRINITY_DN94652_c0_g1;TRINITY_DN94913_c0_g2;TRINITY_DN980…	18	3857	88	25617	0.105157
GO:0005663	DNA replication factor C complex	cellular_component	4	TRINITY_DN117609_c1_g1;TRINITY_DN118884_c0_g1;TRINITY_DN122252_c2_g4	3	3857	8	25617	0.10613
GO:0004652	polynucleotide adenylyltransferase activity	molecular_function	8	TRINITY_DN111570_c0_g1;TRINITY_DN118635_c0_g1;TRINITY_DN119187_c1_g1	3	3857	8	25617	0.10613
GO:1900140	regulation of seedling development	biological_process	8	TRINITY_DN108191_c3_g2;TRINITY_DN122933_c1_g3;TRINITY_DN98027_c1_g1	3	3857	8	25617	0.10613
GO:0009902	chloroplast relocation	biological_process	8	TRINITY_DN122362_c0_g1;TRINITY_DN124900_c2_g1;TRINITY_DN98851_c0_g1	3	3857	8	25617	0.10613
GO:0031118	rRNA pseudouridine synthesis	biological_process	13	TRINITY_DN110736_c0_g1;TRINITY_DN113040_c2_g4;TRINITY_DN122751_c1_g2	3	3857	8	25617	0.10613
GO:0015976	carbon utilization	biological_process	3	TRINITY_DN112260_c1_g1;TRINITY_DN112260_c1_g3;TRINITY_DN113979_c1_g1	3	3857	8	25617	0.10613
GO:0004337	geranyltranstransferase activity	molecular_function	7	TRINITY_DN114032_c2_g4;TRINITY_DN119484_c1_g1;TRINITY_DN94793_c1_g1	3	3857	8	25617	0.10613
GO:0003689	DNA clamp loader activity	molecular_function	7	TRINITY_DN117609_c1_g1;TRINITY_DN118884_c0_g1;TRINITY_DN122252_c2_g4	3	3857	8	25617	0.10613
GO:0031349	positive regulation of defense response	biological_process	8	TRINITY_DN103587_c0_g1;TRINITY_DN115089_c0_g2;TRINITY_DN117654_c0_g1	3	3857	8	25617	0.10613
GO:0035542	regulation of SNARE complex assembly	biological_process	9	TRINITY_DN105525_c0_g2;TRINITY_DN116796_c0_g2;TRINITY_DN122745_c3_g3	3	3857	8	25617	0.10613
GO:0031120	snRNA pseudouridine synthesis	biological_process	11	TRINITY_DN110736_c0_g1;TRINITY_DN113040_c2_g4;TRINITY_DN122751_c1_g2	3	3857	8	25617	0.10613
GO:0016811	hydrolase activity, acting on carbon-nitrogen (but not peptide) bonds, in linear amides	molecular_function	6	TRINITY_DN101981_c0_g1;TRINITY_DN111721_c0_g1;TRINITY_DN86628_c0_g1	3	3857	8	25617	0.10613
GO:0006376	mRNA splice site selection	biological_process	9	TRINITY_DN114313_c0_g3;TRINITY_DN116334_c1_g1;TRINITY_DN125022_c3_g1	3	3857	8	25617	0.10613
GO:0031429	box H/ACA snoRNP complex	cellular_component	7	TRINITY_DN110736_c0_g1;TRINITY_DN113040_c2_g4;TRINITY_DN122751_c1_g2	3	3857	8	25617	0.10613
GO:0030897	HOPS complex	cellular_component	5	TRINITY_DN105525_c0_g2;TRINITY_DN116796_c0_g2;TRINITY_DN122745_c3_g3	3	3857	8	25617	0.10613
GO:0030100	regulation of endocytosis	biological_process	7	TRINITY_DN117610_c3_g1;TRINITY_DN93596_c0_g3;TRINITY_DN93596_c0_g4	3	3857	8	25617	0.10613
GO:0022625	cytosolic large ribosomal subunit	cellular_component	8	TRINITY_DN101329_c2_g1;TRINITY_DN102058_c0_g1;TRINITY_DN102116_c2_g1;TRINITY_DN102381_c0_g2;TRINITY_DN106777_c0_g6;TRINITY_DN106856_c0_g5;TRINITY_DN108757_c1_g1;TRINITY_DN109819_c1_g2;TRINITY_DN109819_c1_g5;TRINITY_DN109874_c0_g2;TRINITY_DN110026_c0_g1;TRINITY_DN110187_c1_g2;TRINITY_DN110187_c1_g6;TRINITY_DN110551_c1_g1;TRINITY_DN110604_c0_g4;TRINITY_DN112288_c1_g2;TRINITY_DN112529_c1_g1;TRINITY_…	55	3857	310	25617	0.107227
GO:0003756	protein disulfide isomerase activity	molecular_function	7	TRINITY_DN106266_c0_g1;TRINITY_DN114524_c0_g2;TRINITY_DN115780_c2_g1;TRINITY_DN118351_c1_g1;TRINITY_DN119855_c0_g1;TRINITY_DN119855_c0_g2;TRINITY_DN120471_c0_g1;TRINITY_DN90149_c0_g1;TRINITY_DN90149_c0_g2	9	3857	38	25617	0.107468
GO:0005874	microtubule	cellular_component	7	TRINITY_DN102970_c1_g2;TRINITY_DN106755_c0_g1;TRINITY_DN106755_c1_g1;TRINITY_DN109564_c3_g2;TRINITY_DN110667_c0_g2;TRINITY_DN112057_c0_g2;TRINITY_DN112579_c0_g2;TRINITY_DN113885_c1_g1;TRINITY_DN113975_c0_g5;TRINITY_DN114045_c0_g3;TRINITY_DN115652_c0_g1;TRINITY_DN117455_c5_g6;TRINITY_DN118059_c2_g1;TRINITY_DN119026_c1_g1;TRINITY_DN119202_c5_g3;TRINITY_DN121969_c1_g3;TRINITY_DN122036_c3_g3;TRINITY_…	27	3857	141	25617	0.108903
GO:0010218	response to far red light	biological_process	8	TRINITY_DN100659_c1_g2;TRINITY_DN102292_c2_g2;TRINITY_DN114159_c1_g1;TRINITY_DN114159_c1_g2;TRINITY_DN117654_c0_g1;TRINITY_DN119970_c1_g3;TRINITY_DN121114_c0_g1;TRINITY_DN122914_c1_g4;TRINITY_DN124416_c4_g4;TRINITY_DN90468_c0_g2;TRINITY_DN99684_c0_g1	11	3857	49	25617	0.109324
GO:1902395	regulation of 1-deoxy-D-xylulose-5-phosphate synthase activity	biological_process	7	TRINITY_DN113044_c0_g1;TRINITY_DN92051_c1_g1	2	3857	4	25617	0.110239
GO:0000967	rRNA 5'-end processing	biological_process	12	TRINITY_DN117347_c0_g2;TRINITY_DN97643_c0_g3	2	3857	4	25617	0.110239
GO:0061927	TOC-TIC supercomplex I	cellular_component	4	TRINITY_DN105545_c0_g1;TRINITY_DN119449_c0_g1	2	3857	4	25617	0.110239
GO:0046688	response to copper ion	biological_process	7	TRINITY_DN112786_c0_g1;TRINITY_DN97664_c1_g2	2	3857	4	25617	0.110239
GO:0031426	polycistronic mRNA processing	biological_process	11	TRINITY_DN111962_c1_g1;TRINITY_DN112868_c0_g2	2	3857	4	25617	0.110239
GO:0045056	transcytosis	biological_process	7	TRINITY_DN103999_c2_g1;TRINITY_DN123561_c3_g3	2	3857	4	25617	0.110239
GO:2000636	positive regulation of primary miRNA processing	biological_process	10	TRINITY_DN101199_c4_g4;TRINITY_DN113949_c1_g1	2	3857	4	25617	0.110239
GO:0042351	'de novo' GDP-L-fucose biosynthetic process	biological_process	11	TRINITY_DN112129_c0_g3;TRINITY_DN112285_c1_g1	2	3857	4	25617	0.110239
GO:0000478	endonucleolytic cleavage involved in rRNA processing	biological_process	11	TRINITY_DN96463_c1_g4;TRINITY_DN96463_c1_g5	2	3857	4	25617	0.110239
GO:0004776	succinate-CoA ligase (GDP-forming) activity	molecular_function	8	TRINITY_DN106716_c0_g2;TRINITY_DN116126_c0_g2	2	3857	4	25617	0.110239
GO:0034508	centromere complex assembly	biological_process	7	TRINITY_DN110535_c3_g4;TRINITY_DN122985_c4_g2	2	3857	4	25617	0.110239
GO:0048438	floral whorl development	biological_process	5	TRINITY_DN104437_c4_g1;TRINITY_DN94913_c0_g2	2	3857	4	25617	0.110239
GO:1900151	regulation of nuclear-transcribed mRNA catabolic process, deadenylation-dependent decay	biological_process	9	TRINITY_DN115422_c0_g3;TRINITY_DN115429_c1_g1	2	3857	4	25617	0.110239
GO:0006047	UDP-N-acetylglucosamine metabolic process	biological_process	7	TRINITY_DN104471_c0_g1;TRINITY_DN112628_c2_g2	2	3857	4	25617	0.110239
GO:0004839	ubiquitin activating enzyme activity	molecular_function	7	TRINITY_DN115220_c6_g1;TRINITY_DN123458_c2_g2	2	3857	4	25617	0.110239
GO:0019521	D-gluconate metabolic process	biological_process	10	TRINITY_DN113573_c0_g3;TRINITY_DN114912_c0_g2	2	3857	4	25617	0.110239
GO:1903798	regulation of production of miRNAs involved in gene silencing by miRNA	biological_process	11	TRINITY_DN113965_c0_g1;TRINITY_DN124388_c5_g2	2	3857	4	25617	0.110239
GO:0051752	phosphoglucan, water dikinase activity	molecular_function	7	TRINITY_DN104191_c1_g2;TRINITY_DN123593_c6_g1	2	3857	4	25617	0.110239
GO:0005911	cell-cell junction	cellular_component	4	TRINITY_DN108763_c1_g2;TRINITY_DN117403_c0_g1	2	3857	4	25617	0.110239
GO:0000419	DNA-directed RNA polymerase V complex	cellular_component	8	TRINITY_DN110093_c1_g1;TRINITY_DN115189_c2_g1	2	3857	4	25617	0.110239
GO:0031167	rRNA methylation	biological_process	13	TRINITY_DN112483_c2_g1;TRINITY_DN122558_c1_g2	2	3857	4	25617	0.110239
GO:0052694	jasmonoyl-isoleucine-12-hydroxylase activity	molecular_function	6	TRINITY_DN108813_c0_g2;TRINITY_DN108813_c1_g1	2	3857	4	25617	0.110239
GO:0010235	guard mother cell cytokinesis	biological_process	7	TRINITY_DN111564_c0_g1;TRINITY_DN94340_c4_g2	2	3857	4	25617	0.110239
GO:0102217	6-phosphoglucan, water dikinase activity	molecular_function	7	TRINITY_DN104191_c1_g2;TRINITY_DN123593_c6_g1	2	3857	4	25617	0.110239
GO:2000122	negative regulation of stomatal complex development	biological_process	9	TRINITY_DN112260_c1_g1;TRINITY_DN112260_c1_g3	2	3857	4	25617	0.110239
GO:0018002	N-terminal peptidyl-glutamic acid acetylation	biological_process	12	TRINITY_DN110432_c2_g1;TRINITY_DN121301_c2_g5	2	3857	4	25617	0.110239
GO:1900055	regulation of leaf senescence	biological_process	9	TRINITY_DN107436_c0_g1;TRINITY_DN124946_c1_g3	2	3857	4	25617	0.110239
GO:0045595	regulation of cell differentiation	biological_process	6	TRINITY_DN118701_c3_g1;TRINITY_DN124710_c4_g1	2	3857	4	25617	0.110239
GO:0060776	simple leaf morphogenesis	biological_process	7	TRINITY_DN105603_c0_g3;TRINITY_DN92636_c0_g1	2	3857	4	25617	0.110239
GO:2000769	regulation of establishment or maintenance of cell polarity regulating cell shape	biological_process	9	TRINITY_DN111953_c1_g1;TRINITY_DN112759_c0_g2	2	3857	4	25617	0.110239
GO:0045132	meiotic chromosome segregation	biological_process	6	TRINITY_DN108473_c0_g2;TRINITY_DN121433_c0_g2	2	3857	4	25617	0.110239
GO:0010078	maintenance of root meristem identity	biological_process	6	TRINITY_DN115644_c0_g1;TRINITY_DN97445_c1_g1	2	3857	4	25617	0.110239
GO:0035494	SNARE complex disassembly	biological_process	8	TRINITY_DN107828_c0_g1;TRINITY_DN107828_c1_g2	2	3857	4	25617	0.110239
GO:0006734	NADH metabolic process	biological_process	4	TRINITY_DN108163_c0_g1;TRINITY_DN116449_c0_g2	2	3857	4	25617	0.110239
GO:0060966	regulation of gene silencing by RNA	biological_process	9	TRINITY_DN104696_c0_g1;TRINITY_DN115189_c2_g1	2	3857	4	25617	0.110239
GO:0034628	'de novo' NAD biosynthetic process from aspartate	biological_process	13	TRINITY_DN110450_c0_g1;TRINITY_DN122462_c2_g1	2	3857	4	25617	0.110239
GO:0008113	peptide-methionine (S)-S-oxide reductase activity	molecular_function	7	TRINITY_DN100659_c1_g1;TRINITY_DN100659_c1_g2	2	3857	4	25617	0.110239
GO:0055063	sulfate ion homeostasis	biological_process	10	TRINITY_DN116316_c0_g1;TRINITY_DN116316_c1_g6	2	3857	4	25617	0.110239
GO:0009772	photosynthetic electron transport in photosystem II	biological_process	8	TRINITY_DN114663_c1_g2;TRINITY_DN90610_c0_g1	2	3857	4	25617	0.110239
GO:2000630	positive regulation of miRNA metabolic process	biological_process	9	TRINITY_DN101199_c4_g4;TRINITY_DN113949_c1_g1	2	3857	4	25617	0.110239
GO:0080173	male-female gamete recognition during double fertilization forming a zygote and endosperm	biological_process	6	TRINITY_DN113573_c0_g3;TRINITY_DN90468_c0_g2	2	3857	4	25617	0.110239
GO:0035145	exon-exon junction complex	cellular_component	4	TRINITY_DN108763_c1_g2;TRINITY_DN91725_c0_g1	2	3857	4	25617	0.110239
GO:0070552	BRISC complex	cellular_component	4	TRINITY_DN106803_c0_g1;TRINITY_DN117872_c1_g2	2	3857	4	25617	0.110239
GO:2000023	regulation of lateral root development	biological_process	9	TRINITY_DN116788_c3_g1;TRINITY_DN121928_c0_g1	2	3857	4	25617	0.110239
GO:0030093	chloroplast photosystem I	cellular_component	8	TRINITY_DN103327_c1_g1;TRINITY_DN106894_c2_g1	2	3857	4	25617	0.110239
GO:0046294	formaldehyde catabolic process	biological_process	8	TRINITY_DN107859_c0_g1;TRINITY_DN111914_c3_g6	2	3857	4	25617	0.110239
GO:0010322	regulation of isopentenyl diphosphate biosynthetic process, methylerythritol 4-phosphate pathway	biological_process	8	TRINITY_DN113044_c0_g1;TRINITY_DN92051_c1_g1	2	3857	4	25617	0.110239
GO:0042823	pyridoxal phosphate biosynthetic process	biological_process	8	TRINITY_DN114913_c1_g1;TRINITY_DN93651_c0_g1	2	3857	4	25617	0.110239
GO:0005982	starch metabolic process	biological_process	9	TRINITY_DN104191_c1_g2;TRINITY_DN108723_c0_g3;TRINITY_DN117630_c3_g1;TRINITY_DN119685_c1_g3;TRINITY_DN122034_c0_g1;TRINITY_DN122035_c0_g1;TRINITY_DN123593_c6_g1;TRINITY_DN91960_c1_g3	8	3857	33	25617	0.112385
GO:0017025	TBP-class protein binding	molecular_function	7	TRINITY_DN101740_c0_g3;TRINITY_DN103693_c2_g1;TRINITY_DN105203_c1_g1;TRINITY_DN112321_c0_g1;TRINITY_DN114150_c0_g2;TRINITY_DN114261_c2_g4;TRINITY_DN124150_c1_g1;TRINITY_DN97851_c2_g1	8	3857	33	25617	0.112385
GO:0042742	defense response to bacterium	biological_process	8	TRINITY_DN100076_c0_g1;TRINITY_DN102495_c0_g2;TRINITY_DN102598_c1_g1;TRINITY_DN104324_c3_g1;TRINITY_DN104949_c0_g3;TRINITY_DN105094_c1_g2;TRINITY_DN105367_c0_g1;TRINITY_DN105447_c0_g1;TRINITY_DN106677_c1_g1;TRINITY_DN107240_c0_g1;TRINITY_DN107900_c1_g1;TRINITY_DN108191_c3_g2;TRINITY_DN108425_c0_g1;TRINITY_DN109582_c2_g1;TRINITY_DN110359_c4_g2;TRINITY_DN110421_c5_g1;TRINITY_DN110542_c2_g3;TRINITY_…	65	3857	373	25617	0.113257
GO:0009543	chloroplast thylakoid lumen	cellular_component	8	TRINITY_DN103178_c0_g1;TRINITY_DN106894_c2_g1;TRINITY_DN110399_c0_g2;TRINITY_DN111847_c1_g5;TRINITY_DN111882_c0_g2;TRINITY_DN112786_c0_g1;TRINITY_DN113158_c0_g1;TRINITY_DN113241_c0_g1;TRINITY_DN115644_c0_g1;TRINITY_DN118632_c0_g1;TRINITY_DN91614_c0_g1;TRINITY_DN99724_c0_g5	12	3857	55	25617	0.115008
GO:0061077	chaperone-mediated protein folding	biological_process	5	TRINITY_DN100807_c0_g1;TRINITY_DN103336_c2_g5;TRINITY_DN104005_c3_g1;TRINITY_DN105076_c1_g2;TRINITY_DN107331_c2_g1;TRINITY_DN107567_c2_g1;TRINITY_DN109082_c3_g1;TRINITY_DN109626_c0_g3;TRINITY_DN111114_c4_g1;TRINITY_DN111293_c1_g2;TRINITY_DN113044_c0_g1;TRINITY_DN113696_c0_g3;TRINITY_DN114900_c0_g4;TRINITY_DN123007_c0_g1;TRINITY_DN124314_c2_g2;TRINITY_DN125043_c6_g2;TRINITY_DN125057_c2_g2;TRINITY_…	19	3857	95	25617	0.11612
GO:1901332	negative regulation of lateral root development	biological_process	9	TRINITY_DN114159_c1_g1;TRINITY_DN114159_c1_g2;TRINITY_DN122597_c2_g1;TRINITY_DN122914_c1_g4	4	3857	13	25617	0.119215
GO:0015977	carbon fixation	biological_process	5	TRINITY_DN102292_c2_g2;TRINITY_DN106297_c0_g1;TRINITY_DN115738_c2_g1;TRINITY_DN121114_c0_g1	4	3857	13	25617	0.119215
GO:0052544	defense response by callose deposition in cell wall	biological_process	7	TRINITY_DN108191_c3_g2;TRINITY_DN117605_c1_g1;TRINITY_DN123937_c2_g1;TRINITY_DN91254_c0_g1	4	3857	13	25617	0.119215
GO:0071035	nuclear polyadenylation-dependent rRNA catabolic process	biological_process	12	TRINITY_DN103402_c1_g1;TRINITY_DN117347_c0_g2;TRINITY_DN122464_c2_g1;TRINITY_DN97643_c0_g3	4	3857	13	25617	0.119215
GO:0009982	pseudouridine synthase activity	molecular_function	6	TRINITY_DN104558_c0_g1;TRINITY_DN110736_c0_g1;TRINITY_DN113040_c2_g4;TRINITY_DN122751_c1_g2	4	3857	13	25617	0.119215
GO:0042274	ribosomal small subunit biogenesis	biological_process	6	TRINITY_DN112938_c7_g6;TRINITY_DN121193_c1_g1;TRINITY_DN90788_c0_g1;TRINITY_DN99931_c2_g2	4	3857	13	25617	0.119215
GO:0033356	UDP-L-arabinose metabolic process	biological_process	6	TRINITY_DN113747_c1_g2;TRINITY_DN89117_c0_g1;TRINITY_DN91095_c2_g2;TRINITY_DN91095_c2_g5	4	3857	13	25617	0.119215
GO:1901371	regulation of leaf morphogenesis	biological_process	8	TRINITY_DN107510_c1_g2;TRINITY_DN114159_c1_g1;TRINITY_DN114159_c1_g2;TRINITY_DN122914_c1_g4	4	3857	13	25617	0.119215
GO:0009737	response to abscisic acid	biological_process	6	TRINITY_DN100401_c0_g1;TRINITY_DN100816_c1_g3;TRINITY_DN101280_c1_g5;TRINITY_DN104446_c1_g1;TRINITY_DN104908_c0_g4;TRINITY_DN105276_c0_g1;TRINITY_DN105753_c0_g2;TRINITY_DN106049_c0_g1;TRINITY_DN107934_c2_g1;TRINITY_DN108003_c0_g1;TRINITY_DN108191_c3_g2;TRINITY_DN108417_c1_g2;TRINITY_DN108723_c0_g3;TRINITY_DN108966_c1_g4;TRINITY_DN109446_c0_g1;TRINITY_DN109667_c0_g1;TRINITY_DN110662_c0_g1;TRINITY_…	72	3857	418	25617	0.119873
GO:0048471	perinuclear region of cytoplasm	cellular_component	6	TRINITY_DN108417_c1_g2;TRINITY_DN116864_c4_g1;TRINITY_DN117086_c1_g1;TRINITY_DN118302_c1_g1;TRINITY_DN119080_c4_g1;TRINITY_DN97445_c1_g1	6	3857	23	25617	0.120424
GO:0036402	proteasome-activating ATPase activity	molecular_function	11	TRINITY_DN105203_c1_g1;TRINITY_DN112321_c0_g1;TRINITY_DN114150_c0_g2;TRINITY_DN114261_c2_g4;TRINITY_DN124150_c1_g1;TRINITY_DN97851_c2_g1	6	3857	23	25617	0.120424
GO:0045899	positive regulation of RNA polymerase II transcriptional preinitiation complex assembly	biological_process	8	TRINITY_DN105203_c1_g1;TRINITY_DN112321_c0_g1;TRINITY_DN114150_c0_g2;TRINITY_DN114261_c2_g4;TRINITY_DN124150_c1_g1;TRINITY_DN97851_c2_g1	6	3857	23	25617	0.120424
GO:0031597	cytosolic proteasome complex	cellular_component	6	TRINITY_DN105203_c1_g1;TRINITY_DN112321_c0_g1;TRINITY_DN114150_c0_g2;TRINITY_DN114261_c2_g4;TRINITY_DN124150_c1_g1;TRINITY_DN97851_c2_g1	6	3857	23	25617	0.120424
GO:0006413	translational initiation	biological_process	5	TRINITY_DN101066_c0_g1;TRINITY_DN104701_c0_g7;TRINITY_DN105203_c1_g4;TRINITY_DN107442_c0_g1;TRINITY_DN109187_c2_g10;TRINITY_DN109577_c1_g1;TRINITY_DN115422_c0_g3;TRINITY_DN115429_c1_g1;TRINITY_DN115735_c0_g2;TRINITY_DN115948_c0_g1;TRINITY_DN116109_c0_g1;TRINITY_DN119563_c1_g1;TRINITY_DN121135_c1_g2;TRINITY_DN121834_c0_g1;TRINITY_DN121834_c1_g1;TRINITY_DN124479_c2_g2;TRINITY_DN87386_c2_g1;TRINITY_…	23	3857	119	25617	0.121275
GO:0040007	growth	biological_process	3	TRINITY_DN100401_c0_g1;TRINITY_DN110155_c1_g1;TRINITY_DN114448_c1_g3;TRINITY_DN123797_c1_g1;TRINITY_DN123904_c2_g1	5	3857	18	25617	0.121971
GO:0071944	cell periphery	cellular_component	4	TRINITY_DN106219_c2_g2;TRINITY_DN106317_c0_g1;TRINITY_DN109247_c0_g1;TRINITY_DN110541_c1_g2;TRINITY_DN111245_c2_g2;TRINITY_DN114278_c0_g1;TRINITY_DN119351_c0_g1;TRINITY_DN119604_c2_g3;TRINITY_DN121579_c0_g3;TRINITY_DN122688_c0_g2;TRINITY_DN124297_c2_g2;TRINITY_DN87136_c0_g1	12	3857	56	25617	0.127371
GO:0006635	fatty acid beta-oxidation	biological_process	11	TRINITY_DN100706_c2_g1;TRINITY_DN104476_c1_g1;TRINITY_DN109086_c1_g1;TRINITY_DN110768_c0_g3;TRINITY_DN118743_c0_g1;TRINITY_DN119481_c0_g4;TRINITY_DN119528_c1_g1;TRINITY_DN121970_c2_g4;TRINITY_DN122960_c2_g1;TRINITY_DN124883_c5_g1;TRINITY_DN79651_c0_g1;TRINITY_DN91669_c0_g1	12	3857	56	25617	0.127371
GO:0008568	microtubule-severing ATPase activity	molecular_function	11	TRINITY_DN108560_c0_g1;TRINITY_DN114082_c0_g2;TRINITY_DN119108_c0_g1;TRINITY_DN119398_c5_g1;TRINITY_DN119893_c2_g1;TRINITY_DN121213_c0_g3;TRINITY_DN124407_c3_g1;TRINITY_DN94268_c0_g1	8	3857	34	25617	0.128591
GO:0046910	pectinesterase inhibitor activity	molecular_function	6	TRINITY_DN106219_c2_g2;TRINITY_DN106317_c0_g1;TRINITY_DN109247_c0_g1;TRINITY_DN110541_c1_g2;TRINITY_DN111245_c2_g2;TRINITY_DN119604_c2_g3;TRINITY_DN121579_c0_g3;TRINITY_DN122688_c0_g2;TRINITY_DN124297_c2_g2;TRINITY_DN87136_c0_g1	10	3857	45	25617	0.12959
GO:0051453	regulation of intracellular pH	biological_process	12	TRINITY_DN101767_c1_g1;TRINITY_DN106142_c1_g2;TRINITY_DN106671_c1_g2;TRINITY_DN107714_c0_g1;TRINITY_DN111841_c0_g1;TRINITY_DN112606_c0_g1;TRINITY_DN117245_c1_g4;TRINITY_DN123809_c2_g2;TRINITY_DN97062_c0_g3;TRINITY_DN99053_c1_g1	10	3857	45	25617	0.12959
GO:0046777	protein autophosphorylation	biological_process	10	TRINITY_DN101257_c1_g1;TRINITY_DN104191_c1_g2;TRINITY_DN104222_c0_g1;TRINITY_DN104957_c0_g1;TRINITY_DN105402_c6_g1;TRINITY_DN106039_c4_g1;TRINITY_DN107029_c0_g1;TRINITY_DN108139_c0_g1;TRINITY_DN109576_c3_g2;TRINITY_DN109580_c1_g1;TRINITY_DN110058_c2_g1;TRINITY_DN110323_c1_g1;TRINITY_DN110739_c3_g2;TRINITY_DN113472_c1_g1;TRINITY_DN113921_c0_g2;TRINITY_DN114076_c0_g3;TRINITY_DN114159_c1_g1;TRINITY_…	44	3857	247	25617	0.130559
GO:0009644	response to high light intensity	biological_process	8	TRINITY_DN109127_c1_g1;TRINITY_DN111835_c1_g3;TRINITY_DN114159_c1_g1;TRINITY_DN114159_c1_g2;TRINITY_DN115032_c1_g2;TRINITY_DN116222_c0_g1;TRINITY_DN117467_c0_g1;TRINITY_DN117549_c5_g2;TRINITY_DN118311_c0_g1;TRINITY_DN118994_c1_g3;TRINITY_DN119082_c0_g1;TRINITY_DN119830_c0_g1;TRINITY_DN121393_c4_g1;TRINITY_DN122914_c1_g4;TRINITY_DN124346_c3_g5;TRINITY_DN90468_c0_g2;TRINITY_DN93161_c3_g1;TRINITY_DN…	18	3857	91	25617	0.133519
GO:0006986	response to unfolded protein	biological_process	6	TRINITY_DN107360_c0_g1;TRINITY_DN118311_c0_g1;TRINITY_DN118994_c1_g3;TRINITY_DN124346_c3_g5;TRINITY_DN93161_c3_g1;TRINITY_DN97523_c1_g1;TRINITY_DN98951_c0_g1	7	3857	29	25617	0.135113
GO:0010193	response to ozone	biological_process	7	TRINITY_DN108698_c0_g1;TRINITY_DN110359_c4_g2;TRINITY_DN119985_c3_g1;TRINITY_DN120688_c0_g1;TRINITY_DN123851_c2_g4;TRINITY_DN91254_c0_g1;TRINITY_DN97193_c0_g1	7	3857	29	25617	0.135113
GO:0010468	regulation of gene expression	biological_process	7	TRINITY_DN100531_c0_g3;TRINITY_DN102456_c1_g1;TRINITY_DN104280_c1_g1;TRINITY_DN109187_c2_g10;TRINITY_DN110535_c3_g4;TRINITY_DN112163_c0_g2;TRINITY_DN112663_c0_g2;TRINITY_DN113672_c1_g4;TRINITY_DN114045_c0_g3;TRINITY_DN116194_c0_g1;TRINITY_DN116194_c0_g2;TRINITY_DN116689_c2_g1;TRINITY_DN117046_c0_g1;TRINITY_DN119563_c1_g1;TRINITY_DN121128_c0_g7;TRINITY_DN122736_c1_g1;TRINITY_DN124479_c2_g2;TRINITY…	21	3857	109	25617	0.137157
GO:0031977	thylakoid lumen	cellular_component	6	TRINITY_DN103178_c0_g1;TRINITY_DN110359_c4_g2;TRINITY_DN110399_c0_g2;TRINITY_DN111847_c1_g5;TRINITY_DN111882_c0_g2;TRINITY_DN112786_c0_g1;TRINITY_DN113158_c0_g1;TRINITY_DN118632_c0_g1;TRINITY_DN99724_c0_g5	9	3857	40	25617	0.137549
GO:0005852	eukaryotic translation initiation factor 3 complex	cellular_component	4	TRINITY_DN102686_c0_g1;TRINITY_DN105203_c1_g4;TRINITY_DN107442_c0_g1;TRINITY_DN115852_c2_g4;TRINITY_DN116109_c0_g1;TRINITY_DN121135_c1_g2;TRINITY_DN123263_c2_g1;TRINITY_DN94437_c1_g1;TRINITY_DN96161_c1_g1	9	3857	40	25617	0.137549
GO:0045298	tubulin complex	cellular_component	4	TRINITY_DN102970_c1_g2;TRINITY_DN105959_c2_g6;TRINITY_DN106319_c0_g1;TRINITY_DN109753_c1_g2;TRINITY_DN115652_c0_g1;TRINITY_DN117455_c5_g6;TRINITY_DN119026_c1_g1;TRINITY_DN120777_c7_g3;TRINITY_DN122036_c3_g3;TRINITY_DN122753_c2_g1;TRINITY_DN88823_c1_g1;TRINITY_DN98083_c1_g3	12	3857	57	25617	0.140442
GO:0010499	proteasomal ubiquitin-independent protein catabolic process	biological_process	9	TRINITY_DN109367_c0_g3;TRINITY_DN95883_c1_g1;TRINITY_DN97181_c0_g1	3	3857	9	25617	0.142028
GO:0018812	3-hydroxyacyl-CoA dehydratase activity	molecular_function	7	TRINITY_DN110768_c0_g3;TRINITY_DN124883_c5_g1;TRINITY_DN79651_c0_g1	3	3857	9	25617	0.142028
GO:0030388	fructose 1,6-bisphosphate metabolic process	biological_process	7	TRINITY_DN111495_c2_g3;TRINITY_DN97581_c2_g1;TRINITY_DN99524_c0_g3	3	3857	9	25617	0.142028
GO:0010343	singlet oxygen-mediated programmed cell death	biological_process	7	TRINITY_DN114159_c1_g1;TRINITY_DN114159_c1_g2;TRINITY_DN122914_c1_g4	3	3857	9	25617	0.142028
GO:0009881	photoreceptor activity	molecular_function	5	TRINITY_DN105153_c2_g1;TRINITY_DN111319_c2_g2;TRINITY_DN115574_c1_g1	3	3857	9	25617	0.142028
GO:0010598	NAD(P)H dehydrogenase complex (plastoquinone	cellular_component	5	TRINITY_DN102915_c1_g1;TRINITY_DN123882_c1_g3;TRINITY_DN94866_c1_g1	3	3857	9	25617	0.142028
GO:0071000	response to magnetism	biological_process	5	TRINITY_DN114159_c1_g1;TRINITY_DN114159_c1_g2;TRINITY_DN122914_c1_g4	3	3857	9	25617	0.142028
GO:0005669	transcription factor TFIID complex	cellular_component	7	TRINITY_DN101108_c0_g1;TRINITY_DN103693_c2_g1;TRINITY_DN123249_c1_g1	3	3857	9	25617	0.142028
GO:0016591	DNA-directed RNA polymerase II, holoenzyme	cellular_component	7	TRINITY_DN105345_c1_g1;TRINITY_DN105409_c0_g1;TRINITY_DN115553_c3_g1	3	3857	9	25617	0.142028
GO:0070940	dephosphorylation of RNA polymerase II C-terminal domain	biological_process	10	TRINITY_DN105345_c1_g1;TRINITY_DN105409_c0_g1;TRINITY_DN115553_c3_g1	3	3857	9	25617	0.142028
GO:0032784	regulation of DNA-templated transcription, elongation	biological_process	9	TRINITY_DN119777_c1_g1;TRINITY_DN119777_c1_g3;TRINITY_DN120724_c1_g1	3	3857	9	25617	0.142028
GO:0035327	transcriptionally active chromatin	cellular_component	7	TRINITY_DN119777_c1_g1;TRINITY_DN119777_c1_g3;TRINITY_DN122464_c2_g1	3	3857	9	25617	0.142028
GO:0048826	cotyledon morphogenesis	biological_process	5	TRINITY_DN110349_c1_g5;TRINITY_DN93814_c0_g1;TRINITY_DN95543_c2_g2	3	3857	9	25617	0.142028
GO:0042132	fructose 1,6-bisphosphate 1-phosphatase activity	molecular_function	10	TRINITY_DN111495_c2_g3;TRINITY_DN97581_c2_g1;TRINITY_DN99524_c0_g3	3	3857	9	25617	0.142028
GO:0008453	alanine-glyoxylate transaminase activity	molecular_function	7	TRINITY_DN100037_c0_g2;TRINITY_DN113711_c2_g1;TRINITY_DN113711_c2_g2	3	3857	9	25617	0.142028
GO:1902448	positive regulation of shade avoidance	biological_process	7	TRINITY_DN114159_c1_g1;TRINITY_DN114159_c1_g2;TRINITY_DN122914_c1_g4	3	3857	9	25617	0.142028
GO:0009583	detection of light stimulus	biological_process	7	TRINITY_DN114159_c1_g1;TRINITY_DN114159_c1_g2;TRINITY_DN122914_c1_g4	3	3857	9	25617	0.142028
GO:0018401	peptidyl-proline hydroxylation to 4-hydroxy-L-proline	biological_process	7	TRINITY_DN111757_c2_g1;TRINITY_DN115371_c0_g1;TRINITY_DN94331_c0_g3	3	3857	9	25617	0.142028
GO:0016706	oxidoreductase activity, acting on paired donors, with incorporation or reduction of molecular oxygen, 2-oxoglutarate as one donor, and incorporation of one atom each of oxygen into both donors	molecular_function	6	TRINITY_DN111757_c2_g1;TRINITY_DN115371_c0_g1;TRINITY_DN94331_c0_g3	3	3857	9	25617	0.142028
GO:0009451	RNA modification	biological_process	9	TRINITY_DN107325_c0_g1;TRINITY_DN109854_c0_g2;TRINITY_DN113509_c3_g2;TRINITY_DN113509_c3_g4;TRINITY_DN116041_c0_g1;TRINITY_DN118739_c1_g1;TRINITY_DN121017_c0_g4;TRINITY_DN122009_c1_g1;TRINITY_DN122063_c6_g2;TRINITY_DN123186_c2_g1;TRINITY_DN96727_c1_g2;TRINITY_DN97133_c0_g1;TRINITY_DN98237_c1_g1	13	3857	63	25617	0.144314
GO:0000724	double-strand break repair via homologous recombination	biological_process	10	TRINITY_DN102531_c0_g1;TRINITY_DN112104_c0_g4;TRINITY_DN113042_c3_g1;TRINITY_DN114539_c1_g2;TRINITY_DN115469_c2_g1;TRINITY_DN120626_c2_g1;TRINITY_DN95051_c4_g4;TRINITY_DN98712_c0_g1	8	3857	35	25617	0.145928
GO:0010075	regulation of meristem growth	biological_process	7	TRINITY_DN100608_c0_g1;TRINITY_DN109436_c0_g1;TRINITY_DN114159_c1_g1;TRINITY_DN114159_c1_g2;TRINITY_DN114287_c0_g1;TRINITY_DN116249_c1_g1;TRINITY_DN121689_c0_g2;TRINITY_DN122914_c1_g4	8	3857	35	25617	0.145928
GO:0030234	enzyme regulator activity	molecular_function	4	TRINITY_DN111696_c1_g1;TRINITY_DN124315_c2_g2;TRINITY_DN124315_c2_g3;TRINITY_DN90610_c0_g1;TRINITY_DN96320_c2_g1	5	3857	19	25617	0.146076
GO:0035064	methylated histone binding	molecular_function	6	TRINITY_DN100813_c0_g1;TRINITY_DN105554_c0_g1;TRINITY_DN106242_c1_g2;TRINITY_DN117624_c2_g2;TRINITY_DN121789_c1_g1	5	3857	19	25617	0.146076
GO:0009817	defense response to fungus, incompatible interaction	biological_process	7	TRINITY_DN112260_c1_g1;TRINITY_DN112260_c1_g3;TRINITY_DN113708_c0_g1;TRINITY_DN117605_c1_g1;TRINITY_DN121538_c0_g1	5	3857	19	25617	0.146076
GO:0000176	nuclear exosome (RNase complex)	cellular_component	6	TRINITY_DN103402_c1_g1;TRINITY_DN106573_c1_g1;TRINITY_DN122464_c2_g1;TRINITY_DN122502_c2_g1;TRINITY_DN123874_c2_g1	5	3857	19	25617	0.146076
GO:0004300	enoyl-CoA hydratase activity	molecular_function	7	TRINITY_DN104476_c1_g1;TRINITY_DN109086_c1_g1;TRINITY_DN110768_c0_g3;TRINITY_DN124883_c5_g1;TRINITY_DN79651_c0_g1	5	3857	19	25617	0.146076
GO:0019464	glycine decarboxylation via glycine cleavage system	biological_process	13	TRINITY_DN104316_c1_g3;TRINITY_DN115195_c2_g3;TRINITY_DN122928_c0_g2;TRINITY_DN123640_c1_g1;TRINITY_DN88071_c0_g3	5	3857	19	25617	0.146076
GO:0018105	peptidyl-serine phosphorylation	biological_process	10	TRINITY_DN100972_c0_g1;TRINITY_DN101297_c1_g3;TRINITY_DN103730_c1_g3;TRINITY_DN104446_c1_g1;TRINITY_DN105325_c2_g3;TRINITY_DN107787_c2_g2;TRINITY_DN109572_c0_g1;TRINITY_DN110739_c3_g2;TRINITY_DN111434_c0_g1;TRINITY_DN113919_c1_g3;TRINITY_DN114957_c0_g5;TRINITY_DN115457_c1_g2;TRINITY_DN116541_c0_g1;TRINITY_DN116672_c1_g1;TRINITY_DN117298_c0_g1;TRINITY_DN118532_c0_g2;TRINITY_DN119931_c0_g1;TRINITY_…	30	3857	164	25617	0.146504
GO:0008017	microtubule binding	molecular_function	7	TRINITY_DN106755_c0_g1;TRINITY_DN106755_c1_g1;TRINITY_DN108139_c0_g1;TRINITY_DN108505_c2_g1;TRINITY_DN108505_c2_g3;TRINITY_DN109564_c3_g2;TRINITY_DN109584_c2_g1;TRINITY_DN109584_c2_g2;TRINITY_DN110667_c0_g2;TRINITY_DN110768_c0_g3;TRINITY_DN113885_c1_g1;TRINITY_DN113975_c0_g5;TRINITY_DN120923_c1_g1;TRINITY_DN121969_c1_g3;TRINITY_DN123207_c1_g4;TRINITY_DN124083_c0_g1;TRINITY_DN124706_c1_g2;TRINITY_…	21	3857	110	25617	0.146713
GO:0016032	viral process	biological_process	6	TRINITY_DN104920_c2_g1;TRINITY_DN109319_c0_g7;TRINITY_DN109963_c1_g1;TRINITY_DN111434_c0_g1;TRINITY_DN115422_c0_g3;TRINITY_DN115429_c1_g1;TRINITY_DN119616_c2_g2;TRINITY_DN120614_c0_g1;TRINITY_DN120688_c0_g1;TRINITY_DN120833_c0_g2;TRINITY_DN120833_c1_g1;TRINITY_DN91535_c2_g2;TRINITY_DN97740_c0_g1;TRINITY_DN97740_c0_g3	14	3857	69	25617	0.147423
GO:0019430	removal of superoxide radicals	biological_process	7	TRINITY_DN108444_c1_g1;TRINITY_DN116282_c3_g1;TRINITY_DN123102_c0_g2;TRINITY_DN96068_c0_g2	4	3857	14	25617	0.147957
GO:0031428	box C/D snoRNP complex	cellular_component	6	TRINITY_DN104754_c0_g2;TRINITY_DN105034_c1_g1;TRINITY_DN118139_c1_g1;TRINITY_DN99489_c1_g1	4	3857	14	25617	0.147957
GO:0032543	mitochondrial translation	biological_process	9	TRINITY_DN110861_c0_g2;TRINITY_DN121259_c0_g1;TRINITY_DN123872_c3_g2;TRINITY_DN86437_c0_g1	4	3857	14	25617	0.147957
GO:0010204	defense response signaling pathway, resistance gene-independent	biological_process	6	TRINITY_DN115110_c1_g1;TRINITY_DN118104_c2_g3;TRINITY_DN119272_c1_g2;TRINITY_DN124803_c4_g5	4	3857	14	25617	0.147957
GO:0071482	cellular response to light stimulus	biological_process	7	TRINITY_DN109465_c0_g2;TRINITY_DN115644_c0_g1;TRINITY_DN94715_c0_g1;TRINITY_DN99667_c0_g1	4	3857	14	25617	0.147957
GO:0007031	peroxisome organization	biological_process	6	TRINITY_DN102759_c0_g1;TRINITY_DN117925_c0_g1;TRINITY_DN122862_c0_g1;TRINITY_DN99193_c0_g1	4	3857	14	25617	0.147957
GO:1901672	positive regulation of systemic acquired resistance	biological_process	9	TRINITY_DN114159_c1_g1;TRINITY_DN114159_c1_g2;TRINITY_DN118082_c0_g1;TRINITY_DN122914_c1_g4	4	3857	14	25617	0.147957
GO:0006333	chromatin assembly or disassembly	biological_process	6	TRINITY_DN104767_c0_g1;TRINITY_DN112824_c0_g1;TRINITY_DN119777_c1_g1;TRINITY_DN119777_c1_g3	4	3857	14	25617	0.147957
GO:0009767	photosynthetic electron transport chain	biological_process	7	TRINITY_DN103420_c1_g2;TRINITY_DN108781_c0_g1;TRINITY_DN94904_c0_g1;TRINITY_DN95244_c0_g1	4	3857	14	25617	0.147957
GO:0009816	defense response to bacterium, incompatible interaction	biological_process	7	TRINITY_DN100401_c0_g1;TRINITY_DN108414_c0_g1;TRINITY_DN110857_c0_g2;TRINITY_DN114826_c1_g2;TRINITY_DN115110_c1_g1;TRINITY_DN118851_c2_g1;TRINITY_DN119080_c4_g1;TRINITY_DN120688_c0_g1;TRINITY_DN121204_c3_g1;TRINITY_DN124004_c6_g1;TRINITY_DN91254_c0_g1	11	3857	52	25617	0.149929
GO:0004309	exopolyphosphatase activity	molecular_function	8	TRINITY_DN111161_c0_g2	1	3857	1	25617	0.150564
GO:0034724	DNA replication-independent nucleosome organization	biological_process	7	TRINITY_DN97801_c1_g2	1	3857	1	25617	0.150564
GO:0019439	aromatic compound catabolic process	biological_process	6	TRINITY_DN115888_c1_g1	1	3857	1	25617	0.150564
GO:0097361	CIA complex	cellular_component	4	TRINITY_DN92633_c1_g1	1	3857	1	25617	0.150564
GO:0051562	negative regulation of mitochondrial calcium ion concentration	biological_process	13	TRINITY_DN118547_c0_g2	1	3857	1	25617	0.150564
GO:0060586	multicellular organismal iron ion homeostasis	biological_process	5	TRINITY_DN112286_c1_g2	1	3857	1	25617	0.150564
GO:0015157	oligosaccharide transmembrane transporter activity	molecular_function	6	TRINITY_DN107409_c0_g1	1	3857	1	25617	0.150564
GO:0051697	protein delipidation	biological_process	9	TRINITY_DN116495_c0_g1	1	3857	1	25617	0.150564
GO:0004134	4-alpha-glucanotransferase activity	molecular_function	5	TRINITY_DN121198_c1_g1	1	3857	1	25617	0.150564
GO:0048307	ferredoxin-nitrite reductase activity	molecular_function	7	TRINITY_DN111956_c0_g1	1	3857	1	25617	0.150564
GO:0016553	base conversion or substitution editing	biological_process	10	TRINITY_DN97133_c0_g1	1	3857	1	25617	0.150564
GO:1901183	positive regulation of camalexin biosynthetic process	biological_process	8	TRINITY_DN108414_c0_g1	1	3857	1	25617	0.150564
GO:0006360	transcription by RNA polymerase I	biological_process	9	TRINITY_DN101066_c0_g1	1	3857	1	25617	0.150564
GO:0043489	RNA stabilization	biological_process	10	TRINITY_DN97133_c0_g1	1	3857	1	25617	0.150564
GO:0099738	cell cortex region	cellular_component	8	TRINITY_DN108139_c0_g1	1	3857	1	25617	0.150564
GO:0010368	chloroplast isoamylase complex	cellular_component	6	TRINITY_DN110847_c5_g4	1	3857	1	25617	0.150564
GO:0003984	acetolactate synthase activity	molecular_function	6	TRINITY_DN118737_c0_g1	1	3857	1	25617	0.150564
GO:0005358	high-affinity glucose:proton symporter activity	molecular_function	11	TRINITY_DN93401_c0_g1	1	3857	1	25617	0.150564
GO:1904659	glucose transmembrane transport	biological_process	11	TRINITY_DN110297_c0_g2	1	3857	1	25617	0.150564
GO:0019210	kinase inhibitor activity	molecular_function	6	TRINITY_DN102411_c1_g1	1	3857	1	25617	0.150564
GO:0018316	peptide cross-linking via L-cystine	biological_process	10	TRINITY_DN88770_c0_g1	1	3857	1	25617	0.150564
GO:0050421	nitrite reductase (NO-forming) activity	molecular_function	7	TRINITY_DN111956_c0_g1	1	3857	1	25617	0.150564
GO:0015910	peroxisomal long-chain fatty acid import	biological_process	10	TRINITY_DN120776_c0_g1	1	3857	1	25617	0.150564
GO:0032958	inositol phosphate biosynthetic process	biological_process	8	TRINITY_DN121538_c0_g1	1	3857	1	25617	0.150564
GO:0004152	dihydroorotate dehydrogenase activity	molecular_function	7	TRINITY_DN120330_c0_g1	1	3857	1	25617	0.150564
GO:0010188	response to microbial phytotoxin	biological_process	6	TRINITY_DN108698_c0_g1	1	3857	1	25617	0.150564
GO:0061133	endopeptidase activator activity	molecular_function	7	TRINITY_DN98105_c0_g1	1	3857	1	25617	0.150564
GO:0005244	voltage-gated ion channel activity	molecular_function	9	TRINITY_DN94765_c4_g2	1	3857	1	25617	0.150564
GO:0009092	homoserine metabolic process	biological_process	11	TRINITY_DN104418_c0_g1	1	3857	1	25617	0.150564
GO:0008777	acetylornithine deacetylase activity	molecular_function	7	TRINITY_DN108106_c0_g3	1	3857	1	25617	0.150564
GO:0032717	negative regulation of interleukin-8 production	biological_process	8	TRINITY_DN112578_c1_g1	1	3857	1	25617	0.150564
GO:0045263	proton-transporting ATP synthase complex, coupling factor F(o	cellular_component	6	TRINITY_DN103980_c0_g2	1	3857	1	25617	0.150564
GO:0070898	RNA polymerase III transcriptional preinitiation complex assembly	biological_process	10	TRINITY_DN122350_c3_g3	1	3857	1	25617	0.150564
GO:0008670	2,4-dienoyl-CoA reductase (NADPH) activity	molecular_function	7	TRINITY_DN101526_c0_g1	1	3857	1	25617	0.150564
GO:0002938	tRNA guanine ribose methylation	biological_process	13	TRINITY_DN108428_c0_g1	1	3857	1	25617	0.150564
GO:0019424	sulfide oxidation, using siroheme sulfite reductase	biological_process	7	TRINITY_DN117932_c0_g1	1	3857	1	25617	0.150564
GO:0048026	positive regulation of mRNA splicing, via spliceosome	biological_process	10	TRINITY_DN107597_c2_g1	1	3857	1	25617	0.150564
GO:0047598	7-dehydrocholesterol reductase activity	molecular_function	7	TRINITY_DN113417_c1_g1	1	3857	1	25617	0.150564
GO:1990482	sphingolipid alpha-glucuronosyltransferase activity	molecular_function	7	TRINITY_DN117232_c0_g1	1	3857	1	25617	0.150564
GO:0008942	nitrite reductase [NAD(P)H] activity	molecular_function	7	TRINITY_DN104970_c0_g1	1	3857	1	25617	0.150564
GO:0030598	rRNA N-glycosylase activity	molecular_function	8	TRINITY_DN97485_c0_g1	1	3857	1	25617	0.150564
GO:0044533	positive regulation of apoptotic process in other organism	biological_process	10	TRINITY_DN97485_c0_g1	1	3857	1	25617	0.150564
GO:0017126	nucleologenesis	biological_process	8	TRINITY_DN104805_c0_g5	1	3857	1	25617	0.150564
GO:0016070	RNA metabolic process	biological_process	8	TRINITY_DN117145_c0_g1	1	3857	1	25617	0.150564
GO:0080146	L-cysteine desulfhydrase activity	molecular_function	6	TRINITY_DN119949_c0_g1	1	3857	1	25617	0.150564
GO:0010028	xanthophyll cycle	biological_process	12	TRINITY_DN113158_c0_g1	1	3857	1	25617	0.150564
GO:0051738	xanthophyll binding	molecular_function	6	TRINITY_DN115898_c1_g1	1	3857	1	25617	0.150564
GO:0017168	5-oxoprolinase (ATP-hydrolyzing) activity	molecular_function	7	TRINITY_DN94289_c0_g2	1	3857	1	25617	0.150564
GO:0044615	nuclear pore nuclear basket	cellular_component	4	TRINITY_DN120947_c1_g1	1	3857	1	25617	0.150564
GO:0009679	hexose:proton symporter activity	molecular_function	8	TRINITY_DN93401_c0_g1	1	3857	1	25617	0.150564
GO:0032776	DNA methylation on cytosine	biological_process	11	TRINITY_DN115189_c2_g1	1	3857	1	25617	0.150564
GO:0008114	phosphogluconate 2-dehydrogenase activity	molecular_function	7	TRINITY_DN114912_c0_g2	1	3857	1	25617	0.150564
GO:0034245	mitochondrial DNA-directed RNA polymerase complex	cellular_component	7	TRINITY_DN107735_c1_g1	1	3857	1	25617	0.150564
GO:0050281	serine-glyoxylate transaminase activity	molecular_function	7	TRINITY_DN100037_c0_g2	1	3857	1	25617	0.150564
GO:0042754	negative regulation of circadian rhythm	biological_process	6	TRINITY_DN124729_c2_g1	1	3857	1	25617	0.150564
GO:0010011	auxin binding	molecular_function	5	TRINITY_DN121327_c1_g1	1	3857	1	25617	0.150564
GO:0070064	proline-rich region binding	molecular_function	5	TRINITY_DN113613_c1_g4	1	3857	1	25617	0.150564
GO:0014033	neural crest cell differentiation	biological_process	7	TRINITY_DN108763_c1_g2	1	3857	1	25617	0.150564
GO:0048512	circadian behavior	biological_process	5	TRINITY_DN109358_c3_g2	1	3857	1	25617	0.150564
GO:0043235	receptor complex	cellular_component	4	TRINITY_DN96023_c0_g1	1	3857	1	25617	0.150564
GO:0031123	RNA 3'-end processing	biological_process	10	TRINITY_DN122339_c0_g2	1	3857	1	25617	0.150564
GO:0031665	negative regulation of lipopolysaccharide-mediated signaling pathway	biological_process	8	TRINITY_DN112578_c1_g1	1	3857	1	25617	0.150564
GO:0048208	COPII vesicle coating	biological_process	8	TRINITY_DN96414_c0_g1	1	3857	1	25617	0.150564
GO:0102500	beta-maltose 4-alpha-glucanotransferase activity	molecular_function	7	TRINITY_DN121198_c1_g1	1	3857	1	25617	0.150564
GO:0102786	stearoyl-[acp] desaturase activity	molecular_function	7	TRINITY_DN119311_c1_g2	1	3857	1	25617	0.150564
GO:0045003	double-strand break repair via synthesis-dependent strand annealing	biological_process	11	TRINITY_DN114539_c1_g2	1	3857	1	25617	0.150564
GO:1900370	positive regulation of RNA interference	biological_process	8	TRINITY_DN115189_c2_g1	1	3857	1	25617	0.150564
GO:0009765	photosynthesis, light harvesting	biological_process	6	TRINITY_DN90943_c0_g1	1	3857	1	25617	0.150564
GO:0046554	malate dehydrogenase (NADP+) activity	molecular_function	7	TRINITY_DN108163_c0_g1	1	3857	1	25617	0.150564
GO:0000224	peptide-N4-(N-acetyl-beta-glucosaminyl)asparagine amidase activity	molecular_function	7	TRINITY_DN108698_c0_g1	1	3857	1	25617	0.150564
GO:0000025	maltose catabolic process	biological_process	9	TRINITY_DN121198_c1_g1	1	3857	1	25617	0.150564
GO:0004632	phosphopantothenate--cysteine ligase activity	molecular_function	7	TRINITY_DN97056_c0_g2	1	3857	1	25617	0.150564
GO:0015145	monosaccharide transmembrane transporter activity	molecular_function	7	TRINITY_DN93401_c0_g1	1	3857	1	25617	0.150564
GO:0010821	regulation of mitochondrion organization	biological_process	8	TRINITY_DN101280_c1_g5	1	3857	1	25617	0.150564
GO:0048505	regulation of timing of cell differentiation	biological_process	7	TRINITY_DN113708_c0_g1	1	3857	1	25617	0.150564
GO:0004484	mRNA guanylyltransferase activity	molecular_function	9	TRINITY_DN104021_c0_g1	1	3857	1	25617	0.150564
GO:0060339	negative regulation of type I interferon-mediated signaling pathway	biological_process	10	TRINITY_DN112578_c1_g1	1	3857	1	25617	0.150564
GO:0009940	amino-terminal vacuolar sorting propeptide binding	molecular_function	8	TRINITY_DN101117_c1_g1	1	3857	1	25617	0.150564
GO:0061635	regulation of protein complex stability	biological_process	5	TRINITY_DN88339_c0_g1	1	3857	1	25617	0.150564
GO:0000828	inositol hexakisphosphate kinase activity	molecular_function	7	TRINITY_DN121538_c0_g1	1	3857	1	25617	0.150564
GO:0045697	regulation of synergid differentiation	biological_process	7	TRINITY_DN107703_c4_g2	1	3857	1	25617	0.150564
GO:0080124	pheophytinase activity	molecular_function	7	TRINITY_DN95122_c1_g1	1	3857	1	25617	0.150564
GO:0016708	oxidoreductase activity, acting on paired donors, with incorporation or reduction of molecular oxygen, NAD(P)H as one donor, and incorporation of two atoms of oxygen into one donor	molecular_function	6	TRINITY_DN115888_c1_g1	1	3857	1	25617	0.150564
GO:0009976	tocopherol cyclase activity	molecular_function	5	TRINITY_DN109127_c1_g1	1	3857	1	25617	0.150564
GO:2000232	regulation of rRNA processing	biological_process	8	TRINITY_DN119391_c1_g3	1	3857	1	25617	0.150564
GO:0030899	calcium-dependent ATPase activity	molecular_function	11	TRINITY_DN93396_c3_g2	1	3857	1	25617	0.150564
GO:2000617	positive regulation of histone H3-K9 acetylation	biological_process	12	TRINITY_DN124946_c1_g3	1	3857	1	25617	0.150564
GO:0071169	establishment of protein localization to chromatin	biological_process	10	TRINITY_DN110535_c3_g4	1	3857	1	25617	0.150564
GO:0048480	stigma development	biological_process	5	TRINITY_DN108813_c0_g2	1	3857	1	25617	0.150564
GO:0003868	4-hydroxyphenylpyruvate dioxygenase activity	molecular_function	7	TRINITY_DN116452_c0_g1	1	3857	1	25617	0.150564
GO:0004760	serine-pyruvate transaminase activity	molecular_function	7	TRINITY_DN100037_c0_g2	1	3857	1	25617	0.150564
GO:0010209	vacuolar sorting signal binding	molecular_function	7	TRINITY_DN101117_c1_g1	1	3857	1	25617	0.150564
GO:0070573	metallodipeptidase activity	molecular_function	9	TRINITY_DN108106_c0_g3	1	3857	1	25617	0.150564
GO:0018063	cytochrome c-heme linkage	biological_process	11	TRINITY_DN110897_c0_g1	1	3857	1	25617	0.150564
GO:0051177	meiotic sister chromatid cohesion	biological_process	6	TRINITY_DN110535_c3_g4	1	3857	1	25617	0.150564
GO:0044391	ribosomal subunit	cellular_component	6	TRINITY_DN94694_c2_g4	1	3857	1	25617	0.150564
GO:0019673	GDP-mannose metabolic process	biological_process	9	TRINITY_DN112285_c1_g1	1	3857	1	25617	0.150564
GO:0048227	plasma membrane to endosome transport	biological_process	7	TRINITY_DN111025_c0_g1	1	3857	1	25617	0.150564
GO:0016307	phosphatidylinositol phosphate kinase activity	molecular_function	7	TRINITY_DN119287_c0_g2	1	3857	1	25617	0.150564
GO:0042964	thioredoxin reduction	biological_process	5	TRINITY_DN108444_c1_g1	1	3857	1	25617	0.150564
GO:0032688	negative regulation of interferon-beta production	biological_process	9	TRINITY_DN112578_c1_g1	1	3857	1	25617	0.150564
GO:0000217	DNA secondary structure binding	molecular_function	7	TRINITY_DN100433_c0_g1	1	3857	1	25617	0.150564
GO:0009727	detection of ethylene stimulus	biological_process	7	TRINITY_DN108191_c3_g2	1	3857	1	25617	0.150564
GO:0045158	electron transporter, transferring electrons within cytochrome b6/f complex of photosystem II activity	molecular_function	6	TRINITY_DN94904_c0_g1	1	3857	1	25617	0.150564
GO:0031252	cell leading edge	cellular_component	4	TRINITY_DN117403_c0_g1	1	3857	1	25617	0.150564
GO:0033328	peroxisome membrane targeting sequence binding	molecular_function	8	TRINITY_DN117925_c0_g1	1	3857	1	25617	0.150564
GO:0048015	phosphatidylinositol-mediated signaling	biological_process	7	TRINITY_DN118302_c1_g1	1	3857	1	25617	0.150564
GO:0038198	auxin receptor activity	molecular_function	5	TRINITY_DN121327_c1_g1	1	3857	1	25617	0.150564
GO:0000183	chromatin silencing at rDNA	biological_process	6	TRINITY_DN102379_c0_g1	1	3857	1	25617	0.150564
GO:0009312	oligosaccharide biosynthetic process	biological_process	7	TRINITY_DN101463_c0_g1	1	3857	1	25617	0.150564
GO:1990110	callus formation	biological_process	4	TRINITY_DN97445_c1_g1	1	3857	1	25617	0.150564
GO:0000024	maltose biosynthetic process	biological_process	9	TRINITY_DN92515_c2_g1	1	3857	1	25617	0.150564
GO:0019450	L-cysteine catabolic process to pyruvate	biological_process	10	TRINITY_DN119949_c0_g1	1	3857	1	25617	0.150564
GO:0009020	tRNA (guanosine-2'-O-)-methyltransferase activity	molecular_function	10	TRINITY_DN108428_c0_g1	1	3857	1	25617	0.150564
GO:0050162	oxalate oxidase activity	molecular_function	7	TRINITY_DN106352_c0_g3	1	3857	1	25617	0.150564
GO:0045930	negative regulation of mitotic cell cycle	biological_process	8	TRINITY_DN121797_c0_g1	1	3857	1	25617	0.150564
GO:0001156	TFIIIC-class transcription factor binding	molecular_function	8	TRINITY_DN122350_c3_g3	1	3857	1	25617	0.150564
GO:0019133	choline monooxygenase activity	molecular_function	7	TRINITY_DN115888_c1_g1	1	3857	1	25617	0.150564
GO:0045300	acyl-[acyl-carrier-protein] desaturase activity	molecular_function	7	TRINITY_DN119311_c1_g2	1	3857	1	25617	0.150564
GO:0034394	protein localization to cell surface	biological_process	7	TRINITY_DN119597_c0_g2	1	3857	1	25617	0.150564
GO:0009914	hormone transport	biological_process	6	TRINITY_DN115823_c0_g1	1	3857	1	25617	0.150564
GO:0004363	glutathione synthase activity	molecular_function	7	TRINITY_DN99469_c2_g1	1	3857	1	25617	0.150564
GO:0034213	quinolinate catabolic process	biological_process	7	TRINITY_DN118566_c1_g2	1	3857	1	25617	0.150564
GO:0006021	inositol biosynthetic process	biological_process	8	TRINITY_DN110361_c0_g1	1	3857	1	25617	0.150564
GO:0006323	DNA packaging	biological_process	8	TRINITY_DN117932_c0_g1	1	3857	1	25617	0.150564
GO:0050422	strictosidine beta-glucosidase activity	molecular_function	9	TRINITY_DN117335_c2_g1	1	3857	1	25617	0.150564
GO:0008974	phosphoribulokinase activity	molecular_function	7	TRINITY_DN104324_c3_g1	1	3857	1	25617	0.150564
GO:0070973	protein localization to endoplasmic reticulum exit site	biological_process	9	TRINITY_DN96414_c0_g1	1	3857	1	25617	0.150564
GO:0004399	histidinol dehydrogenase activity	molecular_function	7	TRINITY_DN104156_c0_g2	1	3857	1	25617	0.150564
GO:0010541	acropetal auxin transport	biological_process	9	TRINITY_DN100382_c0_g1	1	3857	1	25617	0.150564
GO:0046862	chromoplast membrane	cellular_component	6	TRINITY_DN119082_c0_g1	1	3857	1	25617	0.150564
GO:0009537	proplastid	cellular_component	7	TRINITY_DN109465_c0_g2	1	3857	1	25617	0.150564
GO:0016004	phospholipase activator activity	molecular_function	7	TRINITY_DN106960_c2_g2	1	3857	1	25617	0.150564
GO:0006998	nuclear envelope organization	biological_process	6	TRINITY_DN111977_c0_g1	1	3857	1	25617	0.150564
GO:2000779	regulation of double-strand break repair	biological_process	10	TRINITY_DN122706_c3_g1	1	3857	1	25617	0.150564
GO:0003862	3-isopropylmalate dehydrogenase activity	molecular_function	7	TRINITY_DN105895_c2_g1	1	3857	1	25617	0.150564
GO:0102389	polyprenol reductase activity	molecular_function	7	TRINITY_DN114012_c0_g1	1	3857	1	25617	0.150564
GO:0030943	mitochondrion targeting sequence binding	molecular_function	7	TRINITY_DN122637_c2_g1	1	3857	1	25617	0.150564
GO:0032970	regulation of actin filament-based process	biological_process	6	TRINITY_DN94767_c0_g1	1	3857	1	25617	0.150564
GO:0000309	nicotinamide-nucleotide adenylyltransferase activity	molecular_function	8	TRINITY_DN110450_c0_g1	1	3857	1	25617	0.150564
GO:0006390	mitochondrial transcription	biological_process	10	TRINITY_DN107735_c1_g1	1	3857	1	25617	0.150564
GO:0065002	intracellular protein transmembrane transport	biological_process	11	TRINITY_DN96023_c0_g1	1	3857	1	25617	0.150564
GO:0004328	formamidase activity	molecular_function	7	TRINITY_DN111721_c0_g1	1	3857	1	25617	0.150564
GO:0000722	telomere maintenance via recombination	biological_process	9	TRINITY_DN102531_c0_g1	1	3857	1	25617	0.150564
GO:0030621	U4 snRNA binding	molecular_function	8	TRINITY_DN120082_c3_g3	1	3857	1	25617	0.150564
GO:0035539	8-oxo-7,8-dihydrodeoxyguanosine triphosphate pyrophosphatase activity	molecular_function	9	TRINITY_DN98639_c0_g2	1	3857	1	25617	0.150564
GO:0000340	RNA 7-methylguanosine cap binding	molecular_function	8	TRINITY_DN117403_c0_g1	1	3857	1	25617	0.150564
GO:0034247	snoRNA splicing	biological_process	11	TRINITY_DN115011_c0_g1	1	3857	1	25617	0.150564
GO:0033857	diphosphoinositol-pentakisphosphate kinase activity	molecular_function	7	TRINITY_DN121538_c0_g1	1	3857	1	25617	0.150564
GO:0045486	naringenin 3-dioxygenase activity	molecular_function	7	TRINITY_DN96743_c0_g1	1	3857	1	25617	0.150564
GO:0001103	RNA polymerase II repressing transcription factor binding	molecular_function	8	TRINITY_DN113613_c1_g4	1	3857	1	25617	0.150564
GO:0032433	filopodium tip	cellular_component	6	TRINITY_DN117403_c0_g1	1	3857	1	25617	0.150564
GO:0051570	regulation of histone H3-K9 methylation	biological_process	11	TRINITY_DN122252_c2_g4	1	3857	1	25617	0.150564
GO:0070273	phosphatidylinositol-4-phosphate binding	molecular_function	8	TRINITY_DN118302_c1_g1	1	3857	1	25617	0.150564
GO:0070829	heterochromatin maintenance	biological_process	7	TRINITY_DN115189_c2_g1	1	3857	1	25617	0.150564
GO:0004413	homoserine kinase activity	molecular_function	7	TRINITY_DN104418_c0_g1	1	3857	1	25617	0.150564
GO:0055121	response to high fluence blue light stimulus by blue high-fluence system	biological_process	8	TRINITY_DN112986_c1_g1	1	3857	1	25617	0.150564
GO:0047497	mitochondrion transport along microtubule	biological_process	7	TRINITY_DN101280_c1_g5	1	3857	1	25617	0.150564
GO:0010155	regulation of proton transport	biological_process	10	TRINITY_DN119804_c1_g1	1	3857	1	25617	0.150564
GO:0071356	cellular response to tumor necrosis factor	biological_process	8	TRINITY_DN112578_c1_g1	1	3857	1	25617	0.150564
GO:0071347	cellular response to interleukin-1	biological_process	8	TRINITY_DN112578_c1_g1	1	3857	1	25617	0.150564
GO:0071360	cellular response to exogenous dsRNA	biological_process	9	TRINITY_DN115189_c2_g1	1	3857	1	25617	0.150564
GO:0071327	cellular response to trehalose stimulus	biological_process	9	TRINITY_DN108414_c0_g1	1	3857	1	25617	0.150564
GO:0001181	transcription factor activity, core RNA polymerase I binding	molecular_function	5	TRINITY_DN101066_c0_g1	1	3857	1	25617	0.150564
GO:0098725	symmetric cell division	biological_process	5	TRINITY_DN94340_c4_g2	1	3857	1	25617	0.150564
GO:0005048	signal sequence binding	molecular_function	6	TRINITY_DN111860_c1_g1	1	3857	1	25617	0.150564
GO:0018230	peptidyl-L-cysteine S-palmitoylation	biological_process	12	TRINITY_DN111535_c1_g2	1	3857	1	25617	0.150564
GO:0047889	ferredoxin-nitrate reductase activity	molecular_function	7	TRINITY_DN111956_c0_g1	1	3857	1	25617	0.150564
GO:0051928	positive regulation of calcium ion transport	biological_process	9	TRINITY_DN111806_c1_g1	1	3857	1	25617	0.150564
GO:0042794	plastid rRNA transcription	biological_process	11	TRINITY_DN115584_c0_g1	1	3857	1	25617	0.150564
GO:0000829	inositol heptakisphosphate kinase activity	molecular_function	7	TRINITY_DN121538_c0_g1	1	3857	1	25617	0.150564
GO:0015970	guanosine tetraphosphate biosynthetic process	biological_process	12	TRINITY_DN112960_c6_g3	1	3857	1	25617	0.150564
GO:0010013	N-1-naphthylphthalamic acid binding	molecular_function	5	TRINITY_DN103193_c0_g1	1	3857	1	25617	0.150564
GO:0034090	maintenance of meiotic sister chromatid cohesion	biological_process	6	TRINITY_DN108473_c0_g2	1	3857	1	25617	0.150564
GO:0005227	calcium activated cation channel activity	molecular_function	8	TRINITY_DN105961_c1_g1	1	3857	1	25617	0.150564
GO:0032933	SREBP signaling pathway	biological_process	6	TRINITY_DN109990_c0_g2	1	3857	1	25617	0.150564
GO:0016776	phosphotransferase activity, phosphate group as acceptor	molecular_function	6	TRINITY_DN118992_c0_g1	1	3857	1	25617	0.150564
GO:0008455	alpha-1,6-mannosylglycoprotein 2-beta-N-acetylglucosaminyltransferase activity	molecular_function	8	TRINITY_DN101463_c0_g1	1	3857	1	25617	0.150564
GO:0044772	mitotic cell cycle phase transition	biological_process	6	TRINITY_DN94340_c4_g2	1	3857	1	25617	0.150564
GO:0009780	photosynthetic NADP+ reduction	biological_process	7	TRINITY_DN103327_c1_g1	1	3857	1	25617	0.150564
GO:0033728	divinyl chlorophyllide a 8-vinyl-reductase activity	molecular_function	7	TRINITY_DN114562_c0_g1	1	3857	1	25617	0.150564
GO:0003837	beta-ureidopropionase activity	molecular_function	7	TRINITY_DN101981_c0_g1	1	3857	1	25617	0.150564
GO:0005053	peroxisome matrix targeting signal-2 binding	molecular_function	8	TRINITY_DN107477_c0_g1	1	3857	1	25617	0.150564
GO:0080179	1-methylguanosine metabolic process	biological_process	12	TRINITY_DN119640_c3_g3	1	3857	1	25617	0.150564
GO:1901918	negative regulation of exoribonuclease activity	biological_process	10	TRINITY_DN118170_c0_g2	1	3857	1	25617	0.150564
GO:0046901	tetrahydrofolylpolyglutamate biosynthetic process	biological_process	8	TRINITY_DN122062_c1_g1	1	3857	1	25617	0.150564
GO:0035303	regulation of dephosphorylation	biological_process	9	TRINITY_DN115430_c0_g1	1	3857	1	25617	0.150564
GO:0043903	regulation of symbiosis, encompassing mutualism through parasitism	biological_process	6	TRINITY_DN120461_c1_g1	1	3857	1	25617	0.150564
GO:0045691	regulation of embryo sac central cell differentiation	biological_process	7	TRINITY_DN107703_c4_g2	1	3857	1	25617	0.150564
GO:0004515	nicotinate-nucleotide adenylyltransferase activity	molecular_function	8	TRINITY_DN110450_c0_g1	1	3857	1	25617	0.150564
GO:0070681	glutaminyl-tRNAGln biosynthesis via transamidation	biological_process	12	TRINITY_DN121259_c0_g1	1	3857	1	25617	0.150564
GO:0016074	snoRNA metabolic process	biological_process	10	TRINITY_DN105868_c1_g2	1	3857	1	25617	0.150564
GO:0052629	phosphatidylinositol-3,5-bisphosphate 3-phosphatase activity	molecular_function	11	TRINITY_DN111174_c1_g2	1	3857	1	25617	0.150564
GO:0046422	violaxanthin de-epoxidase activity	molecular_function	5	TRINITY_DN113158_c0_g1	1	3857	1	25617	0.150564
GO:0019285	glycine betaine biosynthetic process from choline	biological_process	8	TRINITY_DN115888_c1_g1	1	3857	1	25617	0.150564
GO:0071731	response to nitric oxide	biological_process	7	TRINITY_DN116733_c0_g1	1	3857	1	25617	0.150564
GO:0015749	monosaccharide transmembrane transport	biological_process	9	TRINITY_DN93401_c0_g1	1	3857	1	25617	0.150564
GO:1900367	positive regulation of defense response to insect	biological_process	8	TRINITY_DN108414_c0_g1	1	3857	1	25617	0.150564
GO:0008446	GDP-mannose 4,6-dehydratase activity	molecular_function	7	TRINITY_DN112285_c1_g1	1	3857	1	25617	0.150564
GO:0004438	phosphatidylinositol-3-phosphatase activity	molecular_function	10	TRINITY_DN111174_c1_g2	1	3857	1	25617	0.150564
GO:0045281	succinate dehydrogenase complex	cellular_component	5	TRINITY_DN91062_c0_g1	1	3857	1	25617	0.150564
GO:0051880	G-quadruplex DNA binding	molecular_function	7	TRINITY_DN102531_c0_g1	1	3857	1	25617	0.150564
GO:1904961	quiescent center organization	biological_process	5	TRINITY_DN122062_c1_g1	1	3857	1	25617	0.150564
GO:0034122	negative regulation of toll-like receptor signaling pathway	biological_process	7	TRINITY_DN112578_c1_g1	1	3857	1	25617	0.150564
GO:0071366	cellular response to indolebutyric acid stimulus	biological_process	7	TRINITY_DN117605_c1_g1	1	3857	1	25617	0.150564
GO:0051744	3,8-divinyl protochlorophyllide a 8-vinyl reductase activity	molecular_function	5	TRINITY_DN114562_c0_g1	1	3857	1	25617	0.150564
GO:0031023	microtubule organizing center organization	biological_process	5	TRINITY_DN94595_c0_g2	1	3857	1	25617	0.150564
GO:0004567	beta-mannosidase activity	molecular_function	8	TRINITY_DN121214_c1_g3	1	3857	1	25617	0.150564
GO:1990592	protein K69-linked ufmylation	biological_process	13	TRINITY_DN90089_c1_g2	1	3857	1	25617	0.150564
GO:0035563	positive regulation of chromatin binding	biological_process	7	TRINITY_DN115189_c2_g1	1	3857	1	25617	0.150564
GO:0004512	inositol-3-phosphate synthase activity	molecular_function	6	TRINITY_DN110361_c0_g1	1	3857	1	25617	0.150564
GO:0019265	glycine biosynthetic process, by transamination of glyoxylate	biological_process	13	TRINITY_DN100037_c0_g2	1	3857	1	25617	0.150564
GO:0090577	RNA polymerase IV transcription factor complex	cellular_component	6	TRINITY_DN115189_c2_g1	1	3857	1	25617	0.150564
GO:2000071	regulation of defense response by callose deposition	biological_process	8	TRINITY_DN98206_c0_g2	1	3857	1	25617	0.150564
GO:0032502	developmental process	biological_process	3	TRINITY_DN106918_c0_g1;TRINITY_DN108160_c1_g2;TRINITY_DN108723_c0_g3;TRINITY_DN109269_c0_g1;TRINITY_DN112860_c0_g1;TRINITY_DN115584_c0_g1;TRINITY_DN118614_c1_g1;TRINITY_DN122034_c0_g1;TRINITY_DN92089_c1_g1	9	3857	41	25617	0.154052
GO:0005788	endoplasmic reticulum lumen	cellular_component	7	TRINITY_DN107360_c0_g1;TRINITY_DN109436_c0_g1;TRINITY_DN112080_c1_g1;TRINITY_DN119272_c1_g2;TRINITY_DN124528_c6_g1;TRINITY_DN96599_c4_g2;TRINITY_DN97845_c1_g2	7	3857	30	25617	0.154644
GO:0006904	vesicle docking involved in exocytosis	biological_process	7	TRINITY_DN102109_c0_g1;TRINITY_DN105377_c1_g2;TRINITY_DN105525_c0_g2;TRINITY_DN108425_c0_g1;TRINITY_DN113090_c0_g7;TRINITY_DN113988_c0_g2;TRINITY_DN114269_c0_g2;TRINITY_DN116796_c0_g2;TRINITY_DN119544_c1_g1;TRINITY_DN121803_c1_g4	10	3857	47	25617	0.160238
GO:0009736	cytokinin-activated signaling pathway	biological_process	6	TRINITY_DN100382_c0_g1;TRINITY_DN101222_c0_g1;TRINITY_DN109582_c2_g1;TRINITY_DN115823_c0_g1;TRINITY_DN116788_c3_g1;TRINITY_DN121009_c0_g1;TRINITY_DN123937_c2_g1;TRINITY_DN124710_c4_g1;TRINITY_DN88092_c0_g1;TRINITY_DN88414_c0_g2	10	3857	47	25617	0.160238
GO:0030599	pectinesterase activity	molecular_function	7	TRINITY_DN106219_c2_g2;TRINITY_DN106317_c0_g1;TRINITY_DN109247_c0_g1;TRINITY_DN110541_c1_g2;TRINITY_DN111245_c2_g2;TRINITY_DN119604_c2_g3;TRINITY_DN121579_c0_g3;TRINITY_DN122688_c0_g2;TRINITY_DN124297_c2_g2;TRINITY_DN87136_c0_g1	10	3857	47	25617	0.160238
GO:0016055	Wnt signaling pathway	biological_process	7	TRINITY_DN100972_c0_g1;TRINITY_DN105325_c2_g3;TRINITY_DN107787_c2_g2;TRINITY_DN116541_c0_g1;TRINITY_DN120140_c0_g4;TRINITY_DN120573_c1_g1;TRINITY_DN120573_c2_g1;TRINITY_DN122105_c2_g1;TRINITY_DN124075_c3_g2;TRINITY_DN97374_c0_g4	10	3857	47	25617	0.160238
GO:0009788	negative regulation of abscisic acid-activated signaling pathway	biological_process	9	TRINITY_DN111695_c0_g1;TRINITY_DN115787_c1_g1;TRINITY_DN116788_c3_g1;TRINITY_DN117565_c0_g2;TRINITY_DN117565_c0_g4;TRINITY_DN119406_c1_g1;TRINITY_DN122769_c1_g1;TRINITY_DN123132_c1_g1;TRINITY_DN124666_c4_g2;TRINITY_DN99741_c1_g2	10	3857	47	25617	0.160238
GO:0004579	dolichyl-diphosphooligosaccharide-protein glycotransferase activity	molecular_function	8	TRINITY_DN107409_c0_g1;TRINITY_DN117987_c2_g4;TRINITY_DN118729_c0_g2;TRINITY_DN123440_c2_g2;TRINITY_DN123516_c5_g2;TRINITY_DN123745_c2_g1	6	3857	25	25617	0.163497
GO:0009910	negative regulation of flower development	biological_process	9	TRINITY_DN100954_c1_g1;TRINITY_DN104437_c4_g1;TRINITY_DN106360_c0_g2;TRINITY_DN121863_c0_g1;TRINITY_DN122543_c2_g1;TRINITY_DN95751_c0_g1;TRINITY_DN96407_c0_g5;TRINITY_DN98343_c0_g2	8	3857	36	25617	0.164339
GO:0000151	ubiquitin ligase complex	cellular_component	5	TRINITY_DN104134_c0_g1;TRINITY_DN110138_c0_g1;TRINITY_DN112893_c1_g1;TRINITY_DN117620_c3_g1;TRINITY_DN118638_c1_g1;TRINITY_DN118789_c6_g1;TRINITY_DN119782_c1_g1;TRINITY_DN121327_c1_g1;TRINITY_DN90468_c0_g2;TRINITY_DN91485_c1_g2;TRINITY_DN97555_c0_g1	11	3857	53	25617	0.164982
GO:0030001	metal ion transport	biological_process	8	TRINITY_DN102198_c1_g2;TRINITY_DN102731_c1_g3;TRINITY_DN108031_c0_g1;TRINITY_DN110174_c1_g1;TRINITY_DN111978_c0_g2;TRINITY_DN115536_c0_g3;TRINITY_DN118425_c5_g2;TRINITY_DN121169_c0_g1;TRINITY_DN121510_c1_g1;TRINITY_DN121884_c0_g5;TRINITY_DN123937_c2_g1;TRINITY_DN125297_c5_g1;TRINITY_DN91925_c0_g1;TRINITY_DN93106_c1_g4;TRINITY_DN93841_c2_g1;TRINITY_DN94209_c1_g1;TRINITY_DN97387_c0_g4	17	3857	88	25617	0.165011
GO:0036002	pre-mRNA binding	molecular_function	7	TRINITY_DN112647_c1_g2;TRINITY_DN113277_c3_g2	2	3857	5	25617	0.165816
GO:1990429	peroxisomal importomer complex	cellular_component	5	TRINITY_DN122862_c0_g1;TRINITY_DN99193_c0_g1	2	3857	5	25617	0.165816
GO:0000384	first spliceosomal transesterification activity	molecular_function	5	TRINITY_DN106276_c0_g1;TRINITY_DN106276_c0_g2	2	3857	5	25617	0.165816
GO:0016417	S-acyltransferase activity	molecular_function	7	TRINITY_DN120610_c0_g1;TRINITY_DN120610_c1_g2	2	3857	5	25617	0.165816
GO:1904143	positive regulation of carotenoid biosynthetic process	biological_process	9	TRINITY_DN100308_c0_g1;TRINITY_DN94005_c0_g1	2	3857	5	25617	0.165816
GO:0010037	response to carbon dioxide	biological_process	6	TRINITY_DN112260_c1_g1;TRINITY_DN112260_c1_g3	2	3857	5	25617	0.165816
GO:0071540	eukaryotic translation initiation factor 3 complex, eIF3e	cellular_component	5	TRINITY_DN107442_c0_g1;TRINITY_DN94437_c1_g1	2	3857	5	25617	0.165816
GO:0009961	response to 1-aminocyclopropane-1-carboxylic acid	biological_process	7	TRINITY_DN113779_c1_g1;TRINITY_DN122192_c3_g2	2	3857	5	25617	0.165816
GO:0032880	regulation of protein localization	biological_process	6	TRINITY_DN108985_c0_g3;TRINITY_DN99440_c3_g1	2	3857	5	25617	0.165816
GO:0005483	soluble NSF attachment protein activity	molecular_function	6	TRINITY_DN107828_c0_g1;TRINITY_DN107828_c1_g2	2	3857	5	25617	0.165816
GO:0045931	positive regulation of mitotic cell cycle	biological_process	8	TRINITY_DN120458_c1_g1;TRINITY_DN121961_c0_g1	2	3857	5	25617	0.165816
GO:0010225	response to UV-C	biological_process	8	TRINITY_DN108414_c0_g1;TRINITY_DN124048_c5_g1	2	3857	5	25617	0.165816
GO:0006107	oxaloacetate metabolic process	biological_process	9	TRINITY_DN108163_c0_g1;TRINITY_DN116449_c0_g2	2	3857	5	25617	0.165816
GO:0008184	glycogen phosphorylase activity	molecular_function	8	TRINITY_DN107896_c0_g1;TRINITY_DN122075_c1_g1	2	3857	5	25617	0.165816
GO:0070827	chromatin maintenance	biological_process	6	TRINITY_DN119777_c1_g1;TRINITY_DN119777_c1_g3	2	3857	5	25617	0.165816
GO:0009880	embryonic pattern specification	biological_process	5	TRINITY_DN108160_c1_g2;TRINITY_DN123375_c3_g1	2	3857	5	25617	0.165816
GO:0032586	protein storage vacuole membrane	cellular_component	9	TRINITY_DN119616_c2_g2;TRINITY_DN96670_c1_g1	2	3857	5	25617	0.165816
GO:0004514	nicotinate-nucleotide diphosphorylase (carboxylating) activity	molecular_function	7	TRINITY_DN118566_c1_g2;TRINITY_DN98120_c0_g2	2	3857	5	25617	0.165816
GO:0003913	DNA photolyase activity	molecular_function	6	TRINITY_DN105153_c2_g1;TRINITY_DN115574_c1_g1	2	3857	5	25617	0.165816
GO:0043433	negative regulation of DNA binding transcription factor activity	biological_process	6	TRINITY_DN104339_c0_g2;TRINITY_DN124729_c2_g1	2	3857	5	25617	0.165816
GO:0034402	recruitment of 3'-end processing factors to RNA polymerase II holoenzyme complex	biological_process	9	TRINITY_DN100731_c0_g1;TRINITY_DN100731_c0_g2	2	3857	5	25617	0.165816
GO:0050220	prostaglandin-E synthase activity	molecular_function	6	TRINITY_DN102225_c0_g2;TRINITY_DN98285_c1_g4	2	3857	5	25617	0.165816
GO:0016710	trans-cinnamate 4-monooxygenase activity	molecular_function	7	TRINITY_DN115534_c1_g1;TRINITY_DN115534_c1_g3	2	3857	5	25617	0.165816
GO:0000032	cell wall mannoprotein biosynthetic process	biological_process	10	TRINITY_DN114027_c1_g3;TRINITY_DN92353_c1_g2	2	3857	5	25617	0.165816
GO:0030658	transport vesicle membrane	cellular_component	7	TRINITY_DN102646_c0_g1;TRINITY_DN119039_c0_g7	2	3857	5	25617	0.165816
GO:0004325	ferrochelatase activity	molecular_function	5	TRINITY_DN111544_c1_g1;TRINITY_DN124208_c1_g1	2	3857	5	25617	0.165816
GO:0003844	1,4-alpha-glucan branching enzyme activity	molecular_function	7	TRINITY_DN110167_c0_g1;TRINITY_DN93708_c1_g1	2	3857	5	25617	0.165816
GO:0043047	single-stranded telomeric DNA binding	molecular_function	9	TRINITY_DN102531_c0_g1;TRINITY_DN102798_c0_g3	2	3857	5	25617	0.165816
GO:0005537	mannose binding	molecular_function	6	TRINITY_DN102819_c0_g4;TRINITY_DN122282_c1_g3	2	3857	5	25617	0.165816
GO:0002188	translation reinitiation	biological_process	7	TRINITY_DN107442_c0_g1;TRINITY_DN94437_c1_g1	2	3857	5	25617	0.165816
GO:0042789	mRNA transcription by RNA polymerase II	biological_process	10	TRINITY_DN119777_c1_g1;TRINITY_DN119777_c1_g3	2	3857	5	25617	0.165816
GO:0010295	(+)-abscisic acid 8'-hydroxylase activity	molecular_function	7	TRINITY_DN107343_c0_g1;TRINITY_DN116382_c0_g1	2	3857	5	25617	0.165816
GO:0004169	dolichyl-phosphate-mannose-protein mannosyltransferase activity	molecular_function	8	TRINITY_DN114027_c1_g3;TRINITY_DN92353_c1_g2	2	3857	5	25617	0.165816
GO:0045926	negative regulation of growth	biological_process	6	TRINITY_DN108139_c0_g1;TRINITY_DN111820_c0_g1	2	3857	5	25617	0.165816
GO:2000693	positive regulation of seed maturation	biological_process	9	TRINITY_DN100374_c0_g1;TRINITY_DN115943_c1_g1	2	3857	5	25617	0.165816
GO:0004311	farnesyltranstransferase activity	molecular_function	7	TRINITY_DN101445_c1_g1;TRINITY_DN114032_c2_g4	2	3857	5	25617	0.165816
GO:0033481	galacturonate biosynthetic process	biological_process	9	TRINITY_DN118937_c1_g1;TRINITY_DN119087_c0_g1	2	3857	5	25617	0.165816
GO:0052658	inositol-1,4,5-trisphosphate 5-phosphatase activity	molecular_function	10	TRINITY_DN92964_c0_g2;TRINITY_DN99505_c5_g2	2	3857	5	25617	0.165816
GO:0045261	proton-transporting ATP synthase complex, catalytic core F(1	cellular_component	6	TRINITY_DN114663_c1_g2;TRINITY_DN90610_c0_g1	2	3857	5	25617	0.165816
GO:0003866	3-phosphoshikimate 1-carboxyvinyltransferase activity	molecular_function	6	TRINITY_DN115111_c2_g2;TRINITY_DN98674_c1_g1	2	3857	5	25617	0.165816
GO:0000492	box C/D snoRNP assembly	biological_process	10	TRINITY_DN112766_c0_g3;TRINITY_DN124281_c1_g1	2	3857	5	25617	0.165816
GO:0044571	[2Fe-2S] cluster assembly	biological_process	7	TRINITY_DN108561_c0_g2;TRINITY_DN120542_c1_g4	2	3857	5	25617	0.165816
GO:0043021	ribonucleoprotein complex binding	molecular_function	5	TRINITY_DN117972_c0_g3;TRINITY_DN94521_c1_g1	2	3857	5	25617	0.165816
GO:0000771	agglutination involved in conjugation	biological_process	7	TRINITY_DN102819_c0_g4;TRINITY_DN122282_c1_g3	2	3857	5	25617	0.165816
GO:0006971	hypotonic response	biological_process	6	TRINITY_DN100374_c0_g1;TRINITY_DN115943_c1_g1	2	3857	5	25617	0.165816
GO:0010588	cotyledon vascular tissue pattern formation	biological_process	7	TRINITY_DN96463_c1_g4;TRINITY_DN96463_c1_g5	2	3857	5	25617	0.165816
GO:0009569	chloroplast starch grain	cellular_component	8	TRINITY_DN117136_c1_g3;TRINITY_DN121965_c0_g2	2	3857	5	25617	0.165816
GO:0005980	glycogen catabolic process	biological_process	10	TRINITY_DN107896_c0_g1;TRINITY_DN122075_c1_g1	2	3857	5	25617	0.165816
GO:0010242	oxygen evolving activity	molecular_function	5	TRINITY_DN111847_c1_g5;TRINITY_DN99724_c0_g5	2	3857	5	25617	0.165816
GO:0051026	chiasma assembly	biological_process	6	TRINITY_DN117444_c0_g1;TRINITY_DN122241_c2_g1	2	3857	5	25617	0.165816
GO:0051205	protein insertion into membrane	biological_process	8	TRINITY_DN111472_c0_g1;TRINITY_DN118718_c1_g1	2	3857	5	25617	0.165816
GO:0031425	chloroplast RNA processing	biological_process	10	TRINITY_DN109686_c2_g1;TRINITY_DN122569_c0_g2	2	3857	5	25617	0.165816
GO:0052659	inositol-1,3,4,5-tetrakisphosphate 5-phosphatase activity	molecular_function	10	TRINITY_DN92964_c0_g2;TRINITY_DN99505_c5_g2	2	3857	5	25617	0.165816
GO:0016301	kinase activity	molecular_function	6	TRINITY_DN100271_c0_g3;TRINITY_DN100384_c5_g1;TRINITY_DN100531_c0_g3;TRINITY_DN101297_c1_g3;TRINITY_DN101614_c1_g1;TRINITY_DN101673_c0_g1;TRINITY_DN101689_c0_g1;TRINITY_DN102456_c1_g1;TRINITY_DN102673_c0_g3;TRINITY_DN103334_c1_g1;TRINITY_DN103525_c3_g1;TRINITY_DN103573_c1_g2;TRINITY_DN103587_c0_g1;TRINITY_DN103730_c1_g3;TRINITY_DN104191_c1_g2;TRINITY_DN104222_c0_g1;TRINITY_DN104446_c1_g1;TRINITY_…	148	3857	912	25617	0.168207
GO:0016485	protein processing	biological_process	8	TRINITY_DN107770_c2_g1;TRINITY_DN110077_c1_g2;TRINITY_DN110611_c1_g1;TRINITY_DN115425_c0_g1;TRINITY_DN116495_c0_g1;TRINITY_DN124923_c3_g1;TRINITY_DN94519_c2_g2;TRINITY_DN96856_c3_g2;TRINITY_DN96986_c1_g2	9	3857	42	25617	0.171472
GO:0006783	heme biosynthetic process	biological_process	9	TRINITY_DN111544_c1_g1;TRINITY_DN115995_c0_g1;TRINITY_DN124208_c1_g1;TRINITY_DN91142_c0_g1;TRINITY_DN92607_c0_g1	5	3857	20	25617	0.172015
GO:0008483	transaminase activity	molecular_function	6	TRINITY_DN101039_c0_g1;TRINITY_DN108297_c1_g2;TRINITY_DN108561_c0_g2;TRINITY_DN108564_c1_g1;TRINITY_DN115183_c0_g1;TRINITY_DN116167_c0_g1;TRINITY_DN119713_c0_g1	7	3857	31	25617	0.175385
GO:0003690	double-stranded DNA binding	molecular_function	7	TRINITY_DN100433_c0_g1;TRINITY_DN101261_c2_g1;TRINITY_DN104655_c1_g1;TRINITY_DN109269_c0_g1;TRINITY_DN115437_c0_g1;TRINITY_DN115584_c0_g1;TRINITY_DN116194_c0_g2;TRINITY_DN117408_c0_g1;TRINITY_DN122535_c2_g2;TRINITY_DN99861_c0_g1	10	3857	48	25617	0.176779
GO:0006414	translational elongation	biological_process	8	TRINITY_DN105447_c0_g1;TRINITY_DN107140_c1_g1;TRINITY_DN117311_c0_g1;TRINITY_DN119777_c1_g1;TRINITY_DN119777_c1_g3;TRINITY_DN88817_c0_g1;TRINITY_DN93297_c5_g3;TRINITY_DN96407_c0_g5;TRINITY_DN97488_c0_g1;TRINITY_DN99620_c1_g1	10	3857	48	25617	0.176779
GO:2000377	regulation of reactive oxygen species metabolic process	biological_process	7	TRINITY_DN101767_c1_g1;TRINITY_DN107436_c0_g1;TRINITY_DN108767_c0_g2;TRINITY_DN110710_c0_g1;TRINITY_DN114159_c1_g1;TRINITY_DN114159_c1_g2;TRINITY_DN120688_c0_g1;TRINITY_DN120813_c1_g4;TRINITY_DN121009_c0_g1;TRINITY_DN122914_c1_g4	10	3857	48	25617	0.176779
GO:0009695	jasmonic acid biosynthetic process	biological_process	10	TRINITY_DN100401_c0_g1;TRINITY_DN104476_c1_g1;TRINITY_DN108629_c0_g1;TRINITY_DN109086_c1_g1;TRINITY_DN111205_c2_g2;TRINITY_DN115491_c0_g4;TRINITY_DN118743_c0_g1;TRINITY_DN119311_c1_g2;TRINITY_DN123575_c1_g3;TRINITY_DN124687_c1_g1	10	3857	48	25617	0.176779
GO:0000243	commitment complex	cellular_component	8	TRINITY_DN105680_c0_g2;TRINITY_DN117518_c0_g2;TRINITY_DN88458_c0_g3;TRINITY_DN91592_c0_g1	4	3857	15	25617	0.179034
GO:0042343	indole glucosinolate metabolic process	biological_process	9	TRINITY_DN101165_c0_g1;TRINITY_DN106089_c1_g1;TRINITY_DN106146_c0_g3;TRINITY_DN116773_c0_g1	4	3857	15	25617	0.179034
GO:0004373	glycogen (starch) synthase activity	molecular_function	8	TRINITY_DN101483_c0_g1;TRINITY_DN101483_c1_g2;TRINITY_DN121965_c0_g2;TRINITY_DN122035_c0_g1	4	3857	15	25617	0.179034
GO:0009855	determination of bilateral symmetry	biological_process	6	TRINITY_DN100608_c0_g1;TRINITY_DN116772_c1_g3;TRINITY_DN121689_c0_g2;TRINITY_DN122682_c1_g2	4	3857	15	25617	0.179034
GO:1902347	response to strigolactone	biological_process	6	TRINITY_DN114159_c1_g1;TRINITY_DN114159_c1_g2;TRINITY_DN117357_c1_g1;TRINITY_DN122914_c1_g4	4	3857	15	25617	0.179034
GO:0010483	pollen tube reception	biological_process	5	TRINITY_DN107409_c0_g1;TRINITY_DN119406_c1_g1;TRINITY_DN122769_c1_g1;TRINITY_DN123132_c1_g1	4	3857	15	25617	0.179034
GO:0005884	actin filament	cellular_component	7	TRINITY_DN103233_c0_g2;TRINITY_DN107248_c0_g2;TRINITY_DN114915_c0_g4;TRINITY_DN98851_c0_g1	4	3857	15	25617	0.179034
GO:0004616	phosphogluconate dehydrogenase (decarboxylating) activity	molecular_function	7	TRINITY_DN107213_c2_g1;TRINITY_DN113573_c0_g3;TRINITY_DN114912_c0_g2	3	3857	10	25617	0.181238
GO:0032454	histone demethylase activity (H3-K9 specific	molecular_function	6	TRINITY_DN102598_c1_g1;TRINITY_DN121805_c1_g1;TRINITY_DN98078_c4_g1	3	3857	10	25617	0.181238
GO:0072387	flavin adenine dinucleotide metabolic process	biological_process	7	TRINITY_DN114159_c1_g1;TRINITY_DN114159_c1_g2;TRINITY_DN122914_c1_g4	3	3857	10	25617	0.181238
GO:0009956	radial pattern formation	biological_process	6	TRINITY_DN116772_c1_g3;TRINITY_DN121797_c0_g1;TRINITY_DN122682_c1_g2	3	3857	10	25617	0.181238
GO:0007062	sister chromatid cohesion	biological_process	5	TRINITY_DN110535_c3_g4;TRINITY_DN117446_c0_g1;TRINITY_DN119052_c0_g1	3	3857	10	25617	0.181238
GO:0030976	thiamine pyrophosphate binding	molecular_function	6	TRINITY_DN106212_c0_g1;TRINITY_DN118737_c0_g1;TRINITY_DN120580_c0_g1	3	3857	10	25617	0.181238
GO:0004737	pyruvate decarboxylase activity	molecular_function	7	TRINITY_DN106212_c0_g1;TRINITY_DN118737_c0_g1;TRINITY_DN120580_c0_g1	3	3857	10	25617	0.181238
GO:0045335	phagocytic vesicle	cellular_component	8	TRINITY_DN108106_c0_g3;TRINITY_DN108425_c0_g1;TRINITY_DN121803_c1_g4	3	3857	10	25617	0.181238
GO:0009267	cellular response to starvation	biological_process	8	TRINITY_DN100374_c0_g1;TRINITY_DN115943_c1_g1;TRINITY_DN123954_c1_g1	3	3857	10	25617	0.181238
GO:0032790	ribosome disassembly	biological_process	8	TRINITY_DN115948_c0_g1;TRINITY_DN122079_c0_g1;TRINITY_DN90407_c0_g1	3	3857	10	25617	0.181238
GO:0010244	response to low fluence blue light stimulus by blue low-fluence system	biological_process	8	TRINITY_DN114159_c1_g1;TRINITY_DN114159_c1_g2;TRINITY_DN122914_c1_g4	3	3857	10	25617	0.181238
GO:0009642	response to light intensity	biological_process	7	TRINITY_DN101274_c0_g1;TRINITY_DN109288_c1_g1;TRINITY_DN114871_c1_g1	3	3857	10	25617	0.181238
GO:0042800	histone methyltransferase activity (H3-K4 specific)	molecular_function	10	TRINITY_DN118150_c1_g1;TRINITY_DN118257_c0_g1;TRINITY_DN122730_c0_g1	3	3857	10	25617	0.181238
GO:0010582	floral meristem determinacy	biological_process	5	TRINITY_DN104437_c4_g1;TRINITY_DN124946_c1_g3;TRINITY_DN94913_c0_g2	3	3857	10	25617	0.181238
GO:0010617	circadian regulation of calcium ion oscillation	biological_process	5	TRINITY_DN114159_c1_g1;TRINITY_DN114159_c1_g2;TRINITY_DN122914_c1_g4	3	3857	10	25617	0.181238
GO:0031930	mitochondria-nucleus signaling pathway	biological_process	5	TRINITY_DN110593_c1_g1;TRINITY_DN113509_c3_g2;TRINITY_DN113509_c3_g4	3	3857	10	25617	0.181238
GO:0016569	covalent chromatin modification	biological_process	6	TRINITY_DN100813_c0_g1;TRINITY_DN105554_c0_g1;TRINITY_DN106123_c0_g1;TRINITY_DN106242_c1_g2;TRINITY_DN113965_c0_g1;TRINITY_DN114539_c1_g2;TRINITY_DN116788_c3_g1;TRINITY_DN117624_c2_g2;TRINITY_DN118082_c0_g1;TRINITY_DN118575_c1_g1;TRINITY_DN121789_c1_g1;TRINITY_DN124388_c5_g2	12	3857	60	25617	0.183692
GO:0032580	Golgi cisterna membrane	cellular_component	8	TRINITY_DN105650_c0_g1;TRINITY_DN112606_c0_g1;TRINITY_DN112894_c1_g1;TRINITY_DN118937_c1_g1;TRINITY_DN119087_c0_g1;TRINITY_DN124424_c8_g2;TRINITY_DN96486_c0_g2;TRINITY_DN98006_c0_g1	8	3857	37	25617	0.183755
GO:0031595	nuclear proteasome complex	cellular_component	6	TRINITY_DN105203_c1_g1;TRINITY_DN112321_c0_g1;TRINITY_DN114150_c0_g2;TRINITY_DN114261_c2_g4;TRINITY_DN124150_c1_g1;TRINITY_DN97851_c2_g1	6	3857	26	25617	0.187173
GO:0016117	carotenoid biosynthetic process	biological_process	11	TRINITY_DN113375_c1_g2;TRINITY_DN116249_c1_g1;TRINITY_DN119082_c0_g1;TRINITY_DN122518_c0_g1;TRINITY_DN122518_c1_g1;TRINITY_DN99056_c2_g2	6	3857	26	25617	0.187173
GO:0006730	one-carbon metabolic process	biological_process	5	TRINITY_DN100536_c0_g1;TRINITY_DN103588_c0_g1;TRINITY_DN122062_c1_g1;TRINITY_DN124549_c8_g1;TRINITY_DN92737_c0_g1;TRINITY_DN98548_c5_g3	6	3857	26	25617	0.187173
GO:0043171	peptide catabolic process	biological_process	8	TRINITY_DN103191_c0_g1;TRINITY_DN107409_c1_g3;TRINITY_DN107409_c1_g5;TRINITY_DN108106_c0_g3;TRINITY_DN122476_c2_g1;TRINITY_DN91248_c0_g1	6	3857	26	25617	0.187173
GO:0005635	nuclear envelope	cellular_component	6	TRINITY_DN101482_c1_g1;TRINITY_DN103267_c0_g1;TRINITY_DN104711_c0_g2;TRINITY_DN108579_c0_g2;TRINITY_DN109762_c1_g2;TRINITY_DN111881_c0_g1;TRINITY_DN111977_c0_g1;TRINITY_DN114757_c0_g1;TRINITY_DN117086_c1_g1;TRINITY_DN120020_c2_g1;TRINITY_DN120907_c1_g1;TRINITY_DN123316_c2_g1;TRINITY_DN89671_c2_g1;TRINITY_DN97481_c3_g5	14	3857	72	25617	0.187404
GO:0019005	SCF ubiquitin ligase complex	cellular_component	7	TRINITY_DN105252_c1_g1;TRINITY_DN105446_c0_g1;TRINITY_DN105603_c0_g3;TRINITY_DN108553_c1_g2;TRINITY_DN110138_c0_g1;TRINITY_DN111475_c0_g2;TRINITY_DN111770_c0_g1;TRINITY_DN113877_c0_g1;TRINITY_DN117845_c2_g1;TRINITY_DN118429_c2_g1;TRINITY_DN119970_c1_g3;TRINITY_DN121327_c1_g1;TRINITY_DN121509_c0_g1;TRINITY_DN122118_c2_g2;TRINITY_DN122456_c3_g1;TRINITY_DN92213_c0_g1;TRINITY_DN92636_c0_g1;TRINITY_DN…	19	3857	102	25617	0.189369
GO:0009723	response to ethylene	biological_process	6	TRINITY_DN100711_c2_g1;TRINITY_DN104949_c0_g3;TRINITY_DN108191_c3_g2;TRINITY_DN109327_c0_g1;TRINITY_DN110710_c0_g1;TRINITY_DN112001_c0_g1;TRINITY_DN112423_c0_g2;TRINITY_DN115299_c0_g1;TRINITY_DN115997_c1_g1;TRINITY_DN116567_c0_g2;TRINITY_DN116733_c0_g1;TRINITY_DN117926_c0_g1;TRINITY_DN119406_c1_g1;TRINITY_DN120688_c0_g1;TRINITY_DN121827_c3_g1;TRINITY_DN122355_c2_g1;TRINITY_DN122769_c1_g1;TRINITY_…	27	3857	151	25617	0.193091
GO:0005747	mitochondrial respiratory chain complex I	cellular_component	7	TRINITY_DN100155_c0_g1;TRINITY_DN103620_c0_g1;TRINITY_DN108767_c0_g2;TRINITY_DN112407_c1_g1;TRINITY_DN113472_c1_g2;TRINITY_DN114424_c1_g2;TRINITY_DN116733_c0_g1;TRINITY_DN89637_c0_g2;TRINITY_DN95904_c0_g1;TRINITY_DN99157_c0_g1	10	3857	49	25617	0.194076
GO:0005778	peroxisomal membrane	cellular_component	8	TRINITY_DN109468_c1_g4;TRINITY_DN109673_c0_g1;TRINITY_DN117925_c0_g1;TRINITY_DN119481_c0_g4;TRINITY_DN119618_c1_g3;TRINITY_DN119886_c0_g1;TRINITY_DN122321_c1_g3;TRINITY_DN122862_c0_g1;TRINITY_DN95999_c0_g1;TRINITY_DN99193_c0_g1	10	3857	49	25617	0.194076
GO:0010119	regulation of stomatal movement	biological_process	6	TRINITY_DN101261_c2_g1;TRINITY_DN104655_c1_g1;TRINITY_DN108191_c3_g2;TRINITY_DN110291_c3_g1;TRINITY_DN112260_c1_g1;TRINITY_DN112260_c1_g3;TRINITY_DN115787_c1_g1;TRINITY_DN116249_c1_g1;TRINITY_DN117565_c0_g4;TRINITY_DN123937_c2_g1;TRINITY_DN99861_c0_g1	11	3857	55	25617	0.197178
GO:0007338	single fertilization	biological_process	5	TRINITY_DN114615_c10_g1;TRINITY_DN114773_c2_g3;TRINITY_DN115097_c1_g3;TRINITY_DN119406_c1_g1;TRINITY_DN122769_c1_g1;TRINITY_DN123132_c1_g1;TRINITY_DN96416_c0_g2	7	3857	32	25617	0.197233
GO:0010305	leaf vascular tissue pattern formation	biological_process	7	TRINITY_DN102960_c2_g1;TRINITY_DN105603_c0_g3;TRINITY_DN92636_c0_g1;TRINITY_DN96463_c1_g4;TRINITY_DN96463_c1_g5;TRINITY_DN98166_c0_g1;TRINITY_DN98166_c0_g2	7	3857	32	25617	0.197233
GO:0080188	RNA-directed DNA methylation	biological_process	11	TRINITY_DN101199_c4_g4;TRINITY_DN108017_c2_g1;TRINITY_DN110093_c1_g1;TRINITY_DN113949_c1_g1;TRINITY_DN115189_c2_g1	5	3857	21	25617	0.199559
GO:0000027	ribosomal large subunit assembly	biological_process	9	TRINITY_DN106777_c0_g6;TRINITY_DN108757_c1_g1;TRINITY_DN109819_c1_g2;TRINITY_DN109819_c1_g5;TRINITY_DN112673_c0_g3;TRINITY_DN113950_c0_g4;TRINITY_DN116785_c1_g2;TRINITY_DN87074_c0_g1;TRINITY_DN87813_c0_g1;TRINITY_DN89556_c0_g2;TRINITY_DN93569_c1_g1;TRINITY_DN93754_c3_g1;TRINITY_DN93799_c0_g2;TRINITY_DN98511_c0_g1	14	3857	73	25617	0.201781
GO:0010229	inflorescence development	biological_process	6	TRINITY_DN106811_c1_g3;TRINITY_DN109374_c1_g2;TRINITY_DN94973_c0_g1;TRINITY_DN96752_c0_g3	4	3857	16	25617	0.212033
GO:0009501	amyloplast	cellular_component	7	TRINITY_DN101483_c0_g1;TRINITY_DN101483_c1_g2;TRINITY_DN109465_c0_g2;TRINITY_DN122035_c0_g1	4	3857	16	25617	0.212033
GO:2001070	starch binding	molecular_function	6	TRINITY_DN104191_c1_g2;TRINITY_DN104950_c0_g1;TRINITY_DN121198_c1_g1;TRINITY_DN123593_c6_g1	4	3857	16	25617	0.212033
GO:0030095	chloroplast photosystem II	cellular_component	8	TRINITY_DN111847_c1_g5;TRINITY_DN111882_c0_g2;TRINITY_DN113158_c0_g1;TRINITY_DN99724_c0_g5	4	3857	16	25617	0.212033
GO:0015629	actin cytoskeleton	cellular_component	7	TRINITY_DN106927_c3_g3;TRINITY_DN113613_c1_g4;TRINITY_DN93603_c0_g1;TRINITY_DN94767_c0_g1	4	3857	16	25617	0.212033
GO:0031593	polyubiquitin modification-dependent protein binding	molecular_function	6	TRINITY_DN122121_c0_g1;TRINITY_DN123349_c1_g1;TRINITY_DN90127_c0_g4;TRINITY_DN99423_c2_g2	4	3857	16	25617	0.212033
GO:0009698	phenylpropanoid metabolic process	biological_process	6	TRINITY_DN108337_c0_g1;TRINITY_DN108629_c0_g1;TRINITY_DN119713_c0_g1;TRINITY_DN122193_c0_g2	4	3857	16	25617	0.212033
GO:0009785	blue light signaling pathway	biological_process	6	TRINITY_DN111093_c1_g1;TRINITY_DN114159_c1_g1;TRINITY_DN114159_c1_g2;TRINITY_DN122914_c1_g4	4	3857	16	25617	0.212033
GO:0006265	DNA topological change	biological_process	8	TRINITY_DN109659_c1_g1;TRINITY_DN116997_c5_g1;TRINITY_DN117495_c0_g3;TRINITY_DN118401_c0_g2;TRINITY_DN122961_c2_g2;TRINITY_DN94387_c1_g1	6	3857	27	25617	0.212075
GO:0009693	ethylene biosynthetic process	biological_process	6	TRINITY_DN100711_c2_g1;TRINITY_DN105201_c3_g2;TRINITY_DN112622_c0_g1;TRINITY_DN118876_c1_g1;TRINITY_DN119713_c0_g1;TRINITY_DN124461_c0_g1	6	3857	27	25617	0.212075
GO:0005802	trans-Golgi network	cellular_component	7	TRINITY_DN100914_c2_g1;TRINITY_DN101117_c1_g1;TRINITY_DN101727_c0_g1;TRINITY_DN102228_c0_g2;TRINITY_DN103569_c0_g1;TRINITY_DN103589_c1_g3;TRINITY_DN104867_c0_g1;TRINITY_DN105028_c0_g2;TRINITY_DN105841_c1_g2;TRINITY_DN106267_c1_g1;TRINITY_DN106970_c0_g2;TRINITY_DN107436_c0_g1;TRINITY_DN107741_c0_g1;TRINITY_DN107949_c0_g2;TRINITY_DN108693_c0_g1;TRINITY_DN109153_c0_g2;TRINITY_DN111736_c1_g1;TRINITY_…	60	3857	360	25617	0.213984
GO:0010311	lateral root formation	biological_process	5	TRINITY_DN100401_c0_g1;TRINITY_DN100531_c0_g3;TRINITY_DN109574_c1_g1;TRINITY_DN112104_c0_g4;TRINITY_DN121327_c1_g1;TRINITY_DN121827_c3_g1;TRINITY_DN121928_c0_g1;TRINITY_DN123071_c2_g1;TRINITY_DN124935_c2_g2;TRINITY_DN125202_c1_g1;TRINITY_DN95051_c4_g4	11	3857	56	25617	0.214241
GO:0009845	seed germination	biological_process	4	TRINITY_DN104476_c1_g1;TRINITY_DN109086_c1_g1;TRINITY_DN109446_c0_g1;TRINITY_DN112196_c0_g1;TRINITY_DN112953_c1_g2;TRINITY_DN117086_c1_g1;TRINITY_DN117357_c1_g1;TRINITY_DN119936_c1_g1;TRINITY_DN92964_c0_g2;TRINITY_DN96407_c0_g5;TRINITY_DN99505_c5_g2	11	3857	56	25617	0.214241
GO:0030244	cellulose biosynthetic process	biological_process	11	TRINITY_DN100202_c1_g1;TRINITY_DN102228_c0_g2;TRINITY_DN103589_c1_g3;TRINITY_DN104260_c1_g3;TRINITY_DN107949_c0_g2;TRINITY_DN114631_c1_g1;TRINITY_DN115644_c0_g1;TRINITY_DN118188_c0_g1;TRINITY_DN118753_c0_g2;TRINITY_DN119045_c3_g3;TRINITY_DN119045_c3_g4;TRINITY_DN119045_c3_g5;TRINITY_DN119783_c3_g2;TRINITY_DN120616_c2_g5;TRINITY_DN123516_c5_g2;TRINITY_DN123851_c2_g4;TRINITY_DN95683_c2_g2;TRINITY_D…	18	3857	98	25617	0.21474
GO:0005198	structural molecule activity	molecular_function	3	TRINITY_DN105041_c0_g1;TRINITY_DN105756_c0_g2;TRINITY_DN105959_c2_g6;TRINITY_DN109341_c2_g3;TRINITY_DN109753_c1_g2;TRINITY_DN110359_c4_g2;TRINITY_DN112242_c0_g2;TRINITY_DN113089_c0_g1;TRINITY_DN115654_c1_g1;TRINITY_DN116353_c0_g1;TRINITY_DN117686_c1_g1;TRINITY_DN119616_c3_g1;TRINITY_DN119982_c1_g2;TRINITY_DN120337_c1_g2;TRINITY_DN124900_c2_g1;TRINITY_DN94401_c1_g2;TRINITY_DN98963_c1_g1	17	3857	92	25617	0.215549
GO:0051287	NAD binding	molecular_function	6	TRINITY_DN101310_c1_g1;TRINITY_DN104156_c0_g2;TRINITY_DN105895_c2_g1;TRINITY_DN107213_c2_g1;TRINITY_DN110094_c3_g2;TRINITY_DN110542_c2_g3;TRINITY_DN110834_c0_g3;TRINITY_DN114424_c1_g2;TRINITY_DN118225_c0_g3;TRINITY_DN119428_c1_g2;TRINITY_DN119995_c0_g1;TRINITY_DN122777_c1_g1;TRINITY_DN124132_c2_g2;TRINITY_DN124549_c8_g1;TRINITY_DN95006_c4_g3;TRINITY_DN98759_c5_g2	16	3857	86	25617	0.216169
GO:0046914	transition metal ion binding	molecular_function	7	TRINITY_DN102731_c1_g3;TRINITY_DN108031_c0_g1;TRINITY_DN110174_c1_g1;TRINITY_DN111978_c0_g2;TRINITY_DN115536_c0_g3;TRINITY_DN121169_c0_g1;TRINITY_DN121884_c0_g5;TRINITY_DN125297_c5_g1;TRINITY_DN91925_c0_g1;TRINITY_DN93106_c1_g4;TRINITY_DN93841_c2_g1;TRINITY_DN94209_c1_g1;TRINITY_DN97387_c0_g4	13	3857	68	25617	0.216359
GO:0048510	regulation of timing of transition from vegetative to reproductive phase	biological_process	8	TRINITY_DN102639_c1_g1;TRINITY_DN112390_c5_g1;TRINITY_DN120189_c1_g2;TRINITY_DN121863_c0_g1;TRINITY_DN93210_c2_g1;TRINITY_DN94913_c0_g2;TRINITY_DN94973_c0_g1	7	3857	33	25617	0.220076
GO:0030515	snoRNA binding	molecular_function	7	TRINITY_DN104754_c0_g2;TRINITY_DN105034_c1_g1;TRINITY_DN112766_c0_g3;TRINITY_DN118139_c1_g1;TRINITY_DN121145_c1_g2;TRINITY_DN123979_c5_g2;TRINITY_DN99489_c1_g1	7	3857	33	25617	0.220076
GO:0007076	mitotic chromosome condensation	biological_process	10	TRINITY_DN110535_c3_g4;TRINITY_DN117456_c0_g2;TRINITY_DN92149_c2_g2	3	3857	11	25617	0.222872
GO:0071006	U2-type catalytic step 1 spliceosome	cellular_component	8	TRINITY_DN113012_c0_g1;TRINITY_DN113277_c3_g2;TRINITY_DN114757_c0_g3	3	3857	11	25617	0.222872
GO:0097428	protein maturation by iron-sulfur cluster transfer	biological_process	8	TRINITY_DN119693_c0_g3;TRINITY_DN120542_c1_g4;TRINITY_DN95312_c3_g1	3	3857	11	25617	0.222872
GO:0008356	asymmetric cell division	biological_process	5	TRINITY_DN114287_c0_g1;TRINITY_DN121797_c0_g1;TRINITY_DN94340_c4_g2	3	3857	11	25617	0.222872
GO:0009882	blue light photoreceptor activity	molecular_function	6	TRINITY_DN114159_c1_g1;TRINITY_DN114159_c1_g2;TRINITY_DN122914_c1_g4	3	3857	11	25617	0.222872
GO:0005199	structural constituent of cell wall	molecular_function	4	TRINITY_DN110223_c0_g1;TRINITY_DN121542_c2_g1;TRINITY_DN87249_c0_g2	3	3857	11	25617	0.222872
GO:0009648	photoperiodism	biological_process	7	TRINITY_DN106811_c1_g3;TRINITY_DN113603_c2_g2;TRINITY_DN96752_c0_g3	3	3857	11	25617	0.222872
GO:0008420	CTD phosphatase activity	molecular_function	10	TRINITY_DN105345_c1_g1;TRINITY_DN105409_c0_g1;TRINITY_DN115553_c3_g1	3	3857	11	25617	0.222872
GO:0008970	phosphatidylcholine 1-acylhydrolase activity	molecular_function	8	TRINITY_DN112519_c2_g1;TRINITY_DN118690_c0_g1;TRINITY_DN94578_c0_g1	3	3857	11	25617	0.222872
GO:0006782	protoporphyrinogen IX biosynthetic process	biological_process	9	TRINITY_DN114074_c0_g1;TRINITY_DN121043_c0_g3;TRINITY_DN91142_c0_g1	3	3857	11	25617	0.222872
GO:0034511	U3 snoRNA binding	molecular_function	8	TRINITY_DN110492_c0_g2;TRINITY_DN121102_c1_g1;TRINITY_DN121102_c1_g2	3	3857	11	25617	0.222872
GO:0004556	alpha-amylase activity	molecular_function	8	TRINITY_DN110847_c5_g4;TRINITY_DN117136_c1_g3;TRINITY_DN124211_c2_g1	3	3857	11	25617	0.222872
GO:0010021	amylopectin biosynthetic process	biological_process	7	TRINITY_DN101483_c0_g1;TRINITY_DN101483_c1_g2;TRINITY_DN110847_c5_g4	3	3857	11	25617	0.222872
GO:0048829	root cap development	biological_process	5	TRINITY_DN111345_c1_g1;TRINITY_DN124769_c1_g2;TRINITY_DN99151_c0_g1	3	3857	11	25617	0.222872
GO:0016605	PML body	cellular_component	8	TRINITY_DN114159_c1_g1;TRINITY_DN114159_c1_g2;TRINITY_DN122914_c1_g4	3	3857	11	25617	0.222872
GO:0097526	spliceosomal tri-snRNP complex	cellular_component	8	TRINITY_DN118641_c0_g1;TRINITY_DN88458_c0_g3;TRINITY_DN99001_c0_g1	3	3857	11	25617	0.222872
GO:0032957	inositol trisphosphate metabolic process	biological_process	8	TRINITY_DN115864_c0_g1;TRINITY_DN92964_c0_g2;TRINITY_DN99505_c5_g2	3	3857	11	25617	0.222872
GO:1902584	positive regulation of response to water deprivation	biological_process	7	TRINITY_DN107140_c1_g1;TRINITY_DN110138_c0_g1;TRINITY_DN83315_c0_g1	3	3857	11	25617	0.222872
GO:0010928	regulation of auxin mediated signaling pathway	biological_process	8	TRINITY_DN105603_c0_g3;TRINITY_DN92389_c0_g1;TRINITY_DN92636_c0_g1	3	3857	11	25617	0.222872
GO:0016851	magnesium chelatase activity	molecular_function	7	TRINITY_DN114898_c1_g2;TRINITY_DN122797_c1_g2;TRINITY_DN124287_c4_g1	3	3857	11	25617	0.222872
GO:0032922	circadian regulation of gene expression	biological_process	5	TRINITY_DN115997_c1_g1;TRINITY_DN122999_c0_g2	2	3857	6	25617	0.22483
GO:0080119	ER body organization	biological_process	6	TRINITY_DN101005_c0_g3;TRINITY_DN111099_c0_g2	2	3857	6	25617	0.22483
GO:0004534	5'-3' exoribonuclease activity	molecular_function	9	TRINITY_DN117347_c0_g2;TRINITY_DN97643_c0_g3	2	3857	6	25617	0.22483
GO:0010076	maintenance of floral meristem identity	biological_process	6	TRINITY_DN104437_c4_g1;TRINITY_DN94913_c0_g2	2	3857	6	25617	0.22483
GO:0070531	BRCA1-A complex	cellular_component	4	TRINITY_DN106803_c0_g1;TRINITY_DN117872_c1_g2	2	3857	6	25617	0.22483
GO:0005080	protein kinase C binding	molecular_function	8	TRINITY_DN112196_c0_g1;TRINITY_DN119936_c1_g1	2	3857	6	25617	0.22483
GO:0018008	N-terminal peptidyl-glycine N-myristoylation	biological_process	12	TRINITY_DN121185_c0_g1;TRINITY_DN121294_c0_g1	2	3857	6	25617	0.22483
GO:0032544	plastid translation	biological_process	9	TRINITY_DN113424_c0_g1;TRINITY_DN117982_c0_g1	2	3857	6	25617	0.22483
GO:0048589	developmental growth	biological_process	4	TRINITY_DN124769_c1_g2;TRINITY_DN99151_c0_g1	2	3857	6	25617	0.22483
GO:0102148	N-acetyl-beta-D-galactosaminidase activity	molecular_function	7	TRINITY_DN111948_c0_g1;TRINITY_DN112302_c0_g3	2	3857	6	25617	0.22483
GO:0035614	snRNA stem-loop binding	molecular_function	8	TRINITY_DN107453_c1_g1;TRINITY_DN124784_c2_g1	2	3857	6	25617	0.22483
GO:0035798	2-alkenal reductase (NADP+) activity	molecular_function	7	TRINITY_DN116472_c1_g1;TRINITY_DN91811_c1_g1	2	3857	6	25617	0.22483
GO:0071051	polyadenylation-dependent snoRNA 3'-end processing	biological_process	13	TRINITY_DN103402_c1_g1;TRINITY_DN106573_c1_g1	2	3857	6	25617	0.22483
GO:0034728	nucleosome organization	biological_process	6	TRINITY_DN119777_c1_g1;TRINITY_DN119777_c1_g3	2	3857	6	25617	0.22483
GO:0045337	farnesyl diphosphate biosynthetic process	biological_process	9	TRINITY_DN119484_c1_g1;TRINITY_DN94793_c1_g1	2	3857	6	25617	0.22483
GO:0005846	nuclear cap binding complex	cellular_component	5	TRINITY_DN112889_c0_g1;TRINITY_DN96004_c1_g1	2	3857	6	25617	0.22483
GO:0004416	hydroxyacylglutathione hydrolase activity	molecular_function	7	TRINITY_DN113464_c1_g1;TRINITY_DN117332_c1_g4	2	3857	6	25617	0.22483
GO:0004021	L-alanine:2-oxoglutarate aminotransferase activity	molecular_function	8	TRINITY_DN113711_c2_g1;TRINITY_DN113711_c2_g2	2	3857	6	25617	0.22483
GO:0008287	protein serine/threonine phosphatase complex	cellular_component	4	TRINITY_DN95244_c0_g1;TRINITY_DN99741_c1_g2	2	3857	6	25617	0.22483
GO:0005536	glucose binding	molecular_function	6	TRINITY_DN102819_c0_g4;TRINITY_DN122282_c1_g3	2	3857	6	25617	0.22483
GO:0005801	cis-Golgi network	cellular_component	6	TRINITY_DN102116_c1_g1;TRINITY_DN106970_c0_g2	2	3857	6	25617	0.22483
GO:0060211	regulation of nuclear-transcribed mRNA poly(A) tail shortening	biological_process	10	TRINITY_DN115422_c0_g3;TRINITY_DN115429_c1_g1	2	3857	6	25617	0.22483
GO:0004379	glycylpeptide N-tetradecanoyltransferase activity	molecular_function	8	TRINITY_DN121185_c0_g1;TRINITY_DN121294_c0_g1	2	3857	6	25617	0.22483
GO:0004888	transmembrane signaling receptor activity	molecular_function	5	TRINITY_DN115115_c0_g1;TRINITY_DN123682_c3_g3	2	3857	6	25617	0.22483
GO:0032482	Rab protein signal transduction	biological_process	8	TRINITY_DN115918_c4_g2;TRINITY_DN98216_c1_g3	2	3857	6	25617	0.22483
GO:0005853	eukaryotic translation elongation factor 1 complex	cellular_component	4	TRINITY_DN105447_c0_g1;TRINITY_DN93297_c5_g3	2	3857	6	25617	0.22483
GO:0060862	negative regulation of floral organ abscission	biological_process	10	TRINITY_DN103587_c0_g1;TRINITY_DN115089_c0_g2	2	3857	6	25617	0.22483
GO:0043087	regulation of GTPase activity	biological_process	7	TRINITY_DN113357_c3_g1;TRINITY_DN115191_c0_g1	2	3857	6	25617	0.22483
GO:0010321	regulation of vegetative phase change	biological_process	8	TRINITY_DN89721_c0_g2;TRINITY_DN97579_c1_g1	2	3857	6	25617	0.22483
GO:0016050	vesicle organization	biological_process	6	TRINITY_DN107603_c1_g3;TRINITY_DN122698_c4_g1	2	3857	6	25617	0.22483
GO:0006751	glutathione catabolic process	biological_process	9	TRINITY_DN114439_c0_g1;TRINITY_DN94289_c0_g2	2	3857	6	25617	0.22483
GO:0072546	ER membrane protein complex	cellular_component	7	TRINITY_DN122125_c1_g1;TRINITY_DN122125_c1_g2	2	3857	6	25617	0.22483
GO:0080048	GDP-D-glucose phosphorylase activity	molecular_function	8	TRINITY_DN115774_c1_g2;TRINITY_DN95893_c1_g4	2	3857	6	25617	0.22483
GO:0008265	Mo-molybdopterin cofactor sulfurase activity	molecular_function	7	TRINITY_DN111277_c0_g2;TRINITY_DN89955_c0_g1	2	3857	6	25617	0.22483
GO:0000923	equatorial microtubule organizing center	cellular_component	7	TRINITY_DN110658_c1_g1;TRINITY_DN124836_c2_g1	2	3857	6	25617	0.22483
GO:0009871	jasmonic acid and ethylene-dependent systemic resistance, ethylene mediated signaling pathway	biological_process	8	TRINITY_DN108191_c3_g2;TRINITY_DN123937_c2_g1	2	3857	6	25617	0.22483
GO:0007050	cell cycle arrest	biological_process	5	TRINITY_DN122344_c1_g2;TRINITY_DN98340_c1_g2	2	3857	6	25617	0.22483
GO:0009652	thigmotropism	biological_process	6	TRINITY_DN116567_c0_g2;TRINITY_DN98171_c1_g3	2	3857	6	25617	0.22483
GO:0071034	CUT catabolic process	biological_process	11	TRINITY_DN103402_c1_g1;TRINITY_DN122464_c2_g1	2	3857	6	25617	0.22483
GO:0071333	cellular response to glucose stimulus	biological_process	10	TRINITY_DN94488_c0_g1;TRINITY_DN94652_c0_g1	2	3857	6	25617	0.22483
GO:0016407	acetyltransferase activity	molecular_function	7	TRINITY_DN114897_c0_g3;TRINITY_DN97579_c1_g1	2	3857	6	25617	0.22483
GO:0080186	developmental vegetative growth	biological_process	5	TRINITY_DN107140_c1_g1;TRINITY_DN109446_c0_g1	2	3857	6	25617	0.22483
GO:0015929	hexosaminidase activity	molecular_function	7	TRINITY_DN111948_c0_g1;TRINITY_DN112302_c0_g3	2	3857	6	25617	0.22483
GO:0004563	beta-N-acetylhexosaminidase activity	molecular_function	8	TRINITY_DN111948_c0_g1;TRINITY_DN112302_c0_g3	2	3857	6	25617	0.22483
GO:0055078	sodium ion homeostasis	biological_process	10	TRINITY_DN118886_c0_g3;TRINITY_DN124355_c4_g2	2	3857	6	25617	0.22483
GO:0045604	regulation of epidermal cell differentiation	biological_process	8	TRINITY_DN114287_c0_g1;TRINITY_DN115442_c0_g1	2	3857	6	25617	0.22483
GO:0051775	response to redox state	biological_process	4	TRINITY_DN107859_c0_g1;TRINITY_DN108163_c0_g1	2	3857	6	25617	0.22483
GO:0051415	microtubule nucleation by interphase microtubule organizing center	biological_process	10	TRINITY_DN110658_c1_g1;TRINITY_DN124836_c2_g1	2	3857	6	25617	0.22483
GO:0000184	nuclear-transcribed mRNA catabolic process, nonsense-mediated decay	biological_process	12	TRINITY_DN112027_c0_g1;TRINITY_DN115422_c0_g3;TRINITY_DN115429_c1_g1;TRINITY_DN119959_c1_g1;TRINITY_DN122399_c0_g2;TRINITY_DN122464_c2_g1;TRINITY_DN91725_c0_g1;TRINITY_DN94521_c1_g1	8	3857	39	25617	0.225282
GO:0004402	histone acetyltransferase activity	molecular_function	11	TRINITY_DN103693_c2_g1;TRINITY_DN113070_c1_g3;TRINITY_DN115442_c0_g1;TRINITY_DN120568_c0_g1;TRINITY_DN121509_c0_g1;TRINITY_DN124885_c5_g2;TRINITY_DN97579_c1_g1;TRINITY_DN98399_c6_g1	8	3857	39	25617	0.225282
GO:0002237	response to molecule of bacterial origin	biological_process	6	TRINITY_DN104696_c0_g1;TRINITY_DN108191_c3_g2;TRINITY_DN113762_c0_g2;TRINITY_DN115110_c1_g1;TRINITY_DN118942_c2_g1;TRINITY_DN119628_c1_g7;TRINITY_DN123937_c2_g1;TRINITY_DN124004_c6_g1	8	3857	39	25617	0.225282
GO:0009826	unidimensional cell growth	biological_process	7	TRINITY_DN102228_c0_g2;TRINITY_DN105494_c6_g5;TRINITY_DN108149_c0_g3;TRINITY_DN110978_c2_g2;TRINITY_DN111669_c0_g2;TRINITY_DN112285_c1_g1;TRINITY_DN114631_c1_g1;TRINITY_DN115115_c0_g1;TRINITY_DN115644_c0_g1;TRINITY_DN118461_c1_g5;TRINITY_DN119783_c3_g2;TRINITY_DN122933_c1_g3;TRINITY_DN123207_c1_g4;TRINITY_DN123516_c5_g2;TRINITY_DN124903_c2_g1;TRINITY_DN125202_c1_g1;TRINITY_DN87249_c0_g2;TRINITY_D…	23	3857	130	25617	0.231675
GO:0046916	cellular transition metal ion homeostasis	biological_process	11	TRINITY_DN102731_c1_g3;TRINITY_DN108031_c0_g1;TRINITY_DN110174_c1_g1;TRINITY_DN111978_c0_g2;TRINITY_DN115536_c0_g3;TRINITY_DN121169_c0_g1;TRINITY_DN121884_c0_g5;TRINITY_DN125297_c5_g1;TRINITY_DN91925_c0_g1;TRINITY_DN93106_c1_g4;TRINITY_DN93841_c2_g1;TRINITY_DN94209_c1_g1;TRINITY_DN97387_c0_g4	13	3857	69	25617	0.232362
GO:0035556	intracellular signal transduction	biological_process	5	TRINITY_DN100531_c0_g3;TRINITY_DN101297_c1_g3;TRINITY_DN101868_c2_g2;TRINITY_DN102124_c0_g1;TRINITY_DN102495_c0_g2;TRINITY_DN102748_c2_g1;TRINITY_DN103178_c0_g1;TRINITY_DN103590_c0_g2;TRINITY_DN103730_c1_g3;TRINITY_DN104287_c3_g3;TRINITY_DN104446_c1_g1;TRINITY_DN107345_c1_g1;TRINITY_DN109572_c0_g1;TRINITY_DN109612_c0_g1;TRINITY_DN110083_c0_g1;TRINITY_DN110739_c3_g2;TRINITY_DN110904_c0_g2;TRINITY_…	46	3857	274	25617	0.232587
GO:0004714	transmembrane receptor protein tyrosine kinase activity	molecular_function	9	TRINITY_DN103587_c0_g1;TRINITY_DN109580_c1_g1;TRINITY_DN115089_c0_g2;TRINITY_DN116388_c0_g2;TRINITY_DN121928_c0_g1;TRINITY_DN122933_c1_g3	6	3857	28	25617	0.238038
GO:0016853	isomerase activity	molecular_function	4	TRINITY_DN101809_c0_g1;TRINITY_DN109127_c1_g1;TRINITY_DN112129_c0_g3;TRINITY_DN113874_c0_g1;TRINITY_DN115806_c3_g3;TRINITY_DN97229_c1_g5	6	3857	28	25617	0.238038
GO:0018298	protein-chromophore linkage	biological_process	9	TRINITY_DN105153_c2_g1;TRINITY_DN111319_c2_g2;TRINITY_DN114159_c1_g1;TRINITY_DN114159_c1_g2;TRINITY_DN115574_c1_g1;TRINITY_DN122914_c1_g4	6	3857	28	25617	0.238038
GO:0010154	fruit development	biological_process	6	TRINITY_DN108149_c0_g3;TRINITY_DN108813_c0_g2;TRINITY_DN122003_c4_g5;TRINITY_DN124005_c3_g1;TRINITY_DN124769_c1_g2;TRINITY_DN99151_c0_g1	6	3857	28	25617	0.238038
GO:0006006	glucose metabolic process	biological_process	8	TRINITY_DN109809_c0_g1;TRINITY_DN110094_c3_g2;TRINITY_DN113221_c0_g2;TRINITY_DN115774_c1_g2;TRINITY_DN124132_c2_g2;TRINITY_DN95893_c1_g4;TRINITY_DN98759_c5_g2	7	3857	34	25617	0.243795
GO:0003735	structural constituent of ribosome	molecular_function	4	TRINITY_DN100436_c0_g3;TRINITY_DN100597_c2_g2;TRINITY_DN101329_c2_g1;TRINITY_DN101594_c0_g1;TRINITY_DN101645_c0_g1;TRINITY_DN101851_c0_g2;TRINITY_DN102058_c0_g1;TRINITY_DN102116_c2_g1;TRINITY_DN102381_c0_g2;TRINITY_DN102517_c0_g1;TRINITY_DN103181_c0_g3;TRINITY_DN104091_c0_g1;TRINITY_DN104442_c2_g2;TRINITY_DN104946_c1_g1;TRINITY_DN105459_c1_g1;TRINITY_DN106637_c0_g1;TRINITY_DN106777_c0_g6;TRINITY_…	103	3857	640	25617	0.243932
GO:0009832	plant-type cell wall biogenesis	biological_process	6	TRINITY_DN100202_c1_g1;TRINITY_DN107949_c0_g2;TRINITY_DN109584_c2_g1;TRINITY_DN109584_c2_g2;TRINITY_DN113747_c1_g2;TRINITY_DN118753_c0_g2;TRINITY_DN119045_c3_g3;TRINITY_DN119045_c3_g4;TRINITY_DN119045_c3_g5;TRINITY_DN120616_c2_g5;TRINITY_DN123919_c3_g1;TRINITY_DN89117_c0_g1;TRINITY_DN91095_c2_g2;TRINITY_DN91095_c2_g5;TRINITY_DN95683_c2_g2;TRINITY_DN96486_c0_g2	16	3857	88	25617	0.244812
GO:0009751	response to salicylic acid	biological_process	6	TRINITY_DN107240_c0_g1;TRINITY_DN107510_c1_g2;TRINITY_DN108414_c0_g1;TRINITY_DN108698_c0_g1;TRINITY_DN109327_c0_g1;TRINITY_DN110654_c1_g2;TRINITY_DN112423_c0_g2;TRINITY_DN114542_c0_g1;TRINITY_DN114826_c1_g2;TRINITY_DN115299_c0_g1;TRINITY_DN115997_c1_g1;TRINITY_DN117926_c0_g1;TRINITY_DN118064_c0_g1;TRINITY_DN118942_c2_g1;TRINITY_DN121509_c0_g1;TRINITY_DN122999_c0_g2;TRINITY_DN124729_c2_g1;TRINITY_…	22	3857	125	25617	0.245838
GO:0051539	4 iron, 4 sulfur cluster binding	molecular_function	6	TRINITY_DN102106_c0_g1;TRINITY_DN111956_c0_g1;TRINITY_DN112564_c2_g2;TRINITY_DN113173_c0_g3;TRINITY_DN114424_c1_g2;TRINITY_DN119693_c0_g3;TRINITY_DN120542_c1_g4;TRINITY_DN121135_c1_g2;TRINITY_DN121583_c0_g2;TRINITY_DN122462_c2_g1;TRINITY_DN124518_c1_g1;TRINITY_DN124518_c2_g1;TRINITY_DN91062_c0_g1;TRINITY_DN92978_c0_g7;TRINITY_DN95312_c3_g1	15	3857	82	25617	0.24634
GO:0005763	mitochondrial small ribosomal subunit	cellular_component	9	TRINITY_DN104091_c0_g1;TRINITY_DN112056_c0_g1;TRINITY_DN112056_c0_g3;TRINITY_DN99438_c0_g3	4	3857	17	25617	0.246535
GO:0045489	pectin biosynthetic process	biological_process	8	TRINITY_DN105028_c0_g2;TRINITY_DN106267_c1_g1;TRINITY_DN110898_c0_g1;TRINITY_DN114546_c1_g1	4	3857	17	25617	0.246535
GO:0019722	calcium-mediated signaling	biological_process	7	TRINITY_DN105530_c0_g1;TRINITY_DN113344_c1_g5;TRINITY_DN89104_c0_g1;TRINITY_DN94454_c0_g1	4	3857	17	25617	0.246535
GO:0008180	COP9 signalosome	cellular_component	4	TRINITY_DN114732_c0_g3;TRINITY_DN124750_c5_g1;TRINITY_DN97652_c0_g1;TRINITY_DN98025_c0_g1	4	3857	17	25617	0.246535
GO:0008353	RNA polymerase II carboxy-terminal domain kinase activity	molecular_function	9	TRINITY_DN115354_c1_g2;TRINITY_DN115437_c0_g1;TRINITY_DN123947_c3_g1;TRINITY_DN94340_c4_g2	4	3857	17	25617	0.246535
GO:0047262	polygalacturonate 4-alpha-galacturonosyltransferase activity	molecular_function	7	TRINITY_DN105028_c0_g2;TRINITY_DN110898_c0_g1;TRINITY_DN114546_c1_g1;TRINITY_DN91572_c0_g1	4	3857	17	25617	0.246535
GO:0019941	modification-dependent protein catabolic process	biological_process	9	TRINITY_DN112622_c0_g1;TRINITY_DN115220_c6_g1;TRINITY_DN123458_c2_g2;TRINITY_DN97648_c0_g1	4	3857	17	25617	0.246535
GO:0010043	response to zinc ion	biological_process	7	TRINITY_DN101261_c2_g1;TRINITY_DN104655_c1_g1;TRINITY_DN107242_c0_g1;TRINITY_DN119132_c0_g3;TRINITY_DN119964_c3_g1;TRINITY_DN88817_c0_g1;TRINITY_DN95006_c4_g3;TRINITY_DN99861_c0_g1	8	3857	40	25617	0.247216
GO:0006406	mRNA export from nucleus	biological_process	11	TRINITY_DN101261_c2_g1;TRINITY_DN104655_c1_g1;TRINITY_DN107279_c0_g1;TRINITY_DN116194_c0_g1;TRINITY_DN116194_c0_g2;TRINITY_DN121126_c0_g1;TRINITY_DN123398_c3_g1;TRINITY_DN94521_c1_g1;TRINITY_DN99861_c0_g1	9	3857	46	25617	0.24911
GO:0019252	starch biosynthetic process	biological_process	10	TRINITY_DN101483_c0_g1;TRINITY_DN101483_c1_g2;TRINITY_DN110847_c5_g4;TRINITY_DN111934_c4_g2;TRINITY_DN113221_c0_g2;TRINITY_DN119253_c1_g1;TRINITY_DN121965_c0_g2;TRINITY_DN122035_c0_g1;TRINITY_DN122684_c1_g1	9	3857	46	25617	0.24911
GO:0009739	response to gibberellin	biological_process	6	TRINITY_DN107510_c1_g2;TRINITY_DN108191_c3_g2;TRINITY_DN115997_c1_g1;TRINITY_DN116788_c3_g1;TRINITY_DN122768_c0_g4;TRINITY_DN122999_c0_g2;TRINITY_DN124729_c2_g1;TRINITY_DN87909_c0_g1;TRINITY_DN90948_c3_g2;TRINITY_DN91846_c1_g1;TRINITY_DN94913_c0_g2;TRINITY_DN96407_c0_g5	12	3857	64	25617	0.249644
GO:0031625	ubiquitin protein ligase binding	molecular_function	7	TRINITY_DN101581_c1_g1;TRINITY_DN102474_c1_g1;TRINITY_DN102708_c0_g1;TRINITY_DN110038_c0_g1;TRINITY_DN112769_c0_g1;TRINITY_DN113237_c0_g1;TRINITY_DN115650_c3_g2;TRINITY_DN115861_c1_g1;TRINITY_DN115969_c1_g4;TRINITY_DN115969_c1_g5;TRINITY_DN117412_c0_g1;TRINITY_DN118311_c0_g1;TRINITY_DN118994_c1_g3;TRINITY_DN119849_c0_g2;TRINITY_DN121509_c0_g1;TRINITY_DN121848_c1_g2;TRINITY_DN123165_c1_g3;TRINITY_…	24	3857	138	25617	0.25285
GO:0003755	peptidyl-prolyl cis-trans isomerase activity	molecular_function	6	TRINITY_DN103336_c2_g5;TRINITY_DN107331_c2_g1;TRINITY_DN109082_c3_g1;TRINITY_DN110749_c1_g6;TRINITY_DN111293_c1_g2;TRINITY_DN115806_c3_g3;TRINITY_DN120405_c1_g2;TRINITY_DN122138_c3_g5;TRINITY_DN123007_c0_g1;TRINITY_DN124314_c2_g2;TRINITY_DN125293_c8_g1;TRINITY_DN90806_c0_g1;TRINITY_DN91636_c0_g1;TRINITY_DN96361_c0_g1;TRINITY_DN97229_c1_g5;TRINITY_DN99440_c3_g1;TRINITY_DN99768_c0_g1	17	3857	95	25617	0.257459
GO:0015144	carbohydrate transmembrane transporter activity	molecular_function	5	TRINITY_DN106073_c0_g1;TRINITY_DN109010_c0_g1;TRINITY_DN117707_c0_g2;TRINITY_DN119291_c0_g1;TRINITY_DN93401_c0_g1	5	3857	23	25617	0.258475
GO:0006913	nucleocytoplasmic transport	biological_process	8	TRINITY_DN104959_c0_g1;TRINITY_DN108648_c1_g3;TRINITY_DN115308_c2_g3;TRINITY_DN119694_c1_g1;TRINITY_DN124161_c4_g1	5	3857	23	25617	0.258475
GO:0051131	chaperone-mediated protein complex assembly	biological_process	8	TRINITY_DN107405_c3_g2;TRINITY_DN109626_c0_g3;TRINITY_DN121621_c3_g4;TRINITY_DN123331_c1_g1;TRINITY_DN123331_c2_g5	5	3857	23	25617	0.258475
GO:0009800	cinnamic acid biosynthetic process	biological_process	8	TRINITY_DN105957_c0_g1;TRINITY_DN114542_c0_g1;TRINITY_DN123821_c2_g5;TRINITY_DN94239_c0_g4;TRINITY_DN94239_c0_g5	5	3857	23	25617	0.258475
GO:0048038	quinone binding	molecular_function	5	TRINITY_DN102915_c1_g1;TRINITY_DN109574_c1_g1;TRINITY_DN122886_c2_g2;TRINITY_DN124935_c2_g2;TRINITY_DN94866_c1_g1	5	3857	23	25617	0.258475
GO:0010183	pollen tube guidance	biological_process	4	TRINITY_DN107703_c4_g2;TRINITY_DN122164_c1_g2;TRINITY_DN124991_c3_g1;TRINITY_DN124991_c3_g3;TRINITY_DN92363_c0_g1	5	3857	23	25617	0.258475
GO:0044212	transcription regulatory region DNA binding	molecular_function	7	TRINITY_DN100620_c0_g1;TRINITY_DN100813_c0_g1;TRINITY_DN102639_c1_g1;TRINITY_DN104042_c0_g2;TRINITY_DN104475_c1_g4;TRINITY_DN104949_c0_g3;TRINITY_DN105554_c0_g1;TRINITY_DN105575_c3_g2;TRINITY_DN105786_c4_g3;TRINITY_DN107703_c4_g2;TRINITY_DN107900_c1_g1;TRINITY_DN109166_c2_g2;TRINITY_DN109327_c0_g1;TRINITY_DN110654_c1_g2;TRINITY_DN110949_c0_g1;TRINITY_DN111782_c0_g2;TRINITY_DN112423_c0_g2;TRINITY_…	38	3857	227	25617	0.263579
GO:0006349	regulation of gene expression by genetic imprinting	biological_process	9	TRINITY_DN109559_c1_g1;TRINITY_DN112564_c2_g2;TRINITY_DN113173_c0_g3;TRINITY_DN118739_c1_g1;TRINITY_DN124518_c1_g1;TRINITY_DN92978_c0_g7	6	3857	29	25617	0.264888
GO:0000976	transcription regulatory region sequence-specific DNA binding	molecular_function	8	TRINITY_DN101060_c0_g2;TRINITY_DN102598_c1_g1;TRINITY_DN104696_c0_g1;TRINITY_DN104949_c0_g3;TRINITY_DN121805_c1_g1;TRINITY_DN98078_c4_g1	6	3857	29	25617	0.264888
GO:0008202	steroid metabolic process	biological_process	6	TRINITY_DN101719_c1_g5;TRINITY_DN114773_c2_g3;TRINITY_DN114773_c2_g4;TRINITY_DN87968_c0_g1;TRINITY_DN91665_c0_g1;TRINITY_DN97936_c0_g4	6	3857	29	25617	0.264888
GO:0010008	endosome membrane	cellular_component	8	TRINITY_DN100807_c0_g1;TRINITY_DN104005_c3_g1;TRINITY_DN104770_c2_g1;TRINITY_DN105542_c1_g1;TRINITY_DN110155_c1_g1;TRINITY_DN112606_c0_g1;TRINITY_DN114448_c1_g3;TRINITY_DN120090_c0_g2;TRINITY_DN121264_c2_g2;TRINITY_DN122933_c1_g3;TRINITY_DN125057_c2_g2;TRINITY_DN89012_c0_g1;TRINITY_DN98216_c1_g3	13	3857	71	25617	0.265692
GO:0045309	protein phosphorylated amino acid binding	molecular_function	6	TRINITY_DN109762_c1_g2;TRINITY_DN94500_c2_g1;TRINITY_DN95988_c0_g3	3	3857	12	25617	0.2661
GO:0042753	positive regulation of circadian rhythm	biological_process	6	TRINITY_DN115997_c1_g1;TRINITY_DN122999_c0_g2;TRINITY_DN88780_c0_g1	3	3857	12	25617	0.2661
GO:0000177	cytoplasmic exosome (RNase complex)	cellular_component	6	TRINITY_DN103402_c1_g1;TRINITY_DN106573_c1_g1;TRINITY_DN123874_c2_g1	3	3857	12	25617	0.2661
GO:0015385	sodium:proton antiporter activity	molecular_function	12	TRINITY_DN101767_c1_g1;TRINITY_DN112606_c0_g1;TRINITY_DN97062_c0_g3	3	3857	12	25617	0.2661
GO:0043680	filiform apparatus	cellular_component	6	TRINITY_DN119406_c1_g1;TRINITY_DN122769_c1_g1;TRINITY_DN123132_c1_g1	3	3857	12	25617	0.2661
GO:0030490	maturation of SSU-rRNA	biological_process	12	TRINITY_DN120669_c0_g1;TRINITY_DN121201_c0_g1;TRINITY_DN121201_c0_g3	3	3857	12	25617	0.2661
GO:0005338	nucleotide-sugar transmembrane transporter activity	molecular_function	6	TRINITY_DN102301_c5_g1;TRINITY_DN111736_c1_g1;TRINITY_DN120074_c1_g2	3	3857	12	25617	0.2661
GO:0036297	interstrand cross-link repair	biological_process	9	TRINITY_DN109240_c2_g1;TRINITY_DN109983_c3_g4;TRINITY_DN91870_c0_g1	3	3857	12	25617	0.2661
GO:0048443	stamen development	biological_process	6	TRINITY_DN119970_c1_g3;TRINITY_DN121327_c1_g1;TRINITY_DN122730_c0_g1	3	3857	12	25617	0.2661
GO:1900150	regulation of defense response to fungus	biological_process	7	TRINITY_DN113672_c1_g4;TRINITY_DN113762_c0_g2;TRINITY_DN115299_c0_g1	3	3857	12	25617	0.2661
GO:0010267	production of ta-siRNAs involved in RNA interference	biological_process	13	TRINITY_DN104696_c0_g1;TRINITY_DN112889_c0_g1;TRINITY_DN99790_c0_g3	3	3857	12	25617	0.2661
GO:0000386	second spliceosomal transesterification activity	molecular_function	5	TRINITY_DN121590_c1_g2;TRINITY_DN125162_c2_g1;TRINITY_DN89431_c0_g1	3	3857	12	25617	0.2661
GO:0004321	fatty-acyl-CoA synthase activity	molecular_function	8	TRINITY_DN111205_c2_g2;TRINITY_DN115491_c0_g4;TRINITY_DN124687_c1_g1	3	3857	12	25617	0.2661
GO:0098719	sodium ion import across plasma membrane	biological_process	11	TRINITY_DN101767_c1_g1;TRINITY_DN112606_c0_g1;TRINITY_DN97062_c0_g3	3	3857	12	25617	0.2661
GO:0034219	carbohydrate transmembrane transport	biological_process	8	TRINITY_DN115040_c1_g3;TRINITY_DN116528_c0_g1;TRINITY_DN98054_c1_g2	3	3857	12	25617	0.2661
GO:0006875	cellular metal ion homeostasis	biological_process	10	TRINITY_DN102579_c0_g1;TRINITY_DN118425_c5_g2;TRINITY_DN120001_c1_g3	3	3857	12	25617	0.2661
GO:0010027	thylakoid membrane organization	biological_process	7	TRINITY_DN102888_c0_g4;TRINITY_DN106251_c0_g1;TRINITY_DN113102_c1_g1;TRINITY_DN114697_c0_g1;TRINITY_DN115898_c1_g1;TRINITY_DN96023_c0_g1;TRINITY_DN99707_c0_g3	7	3857	35	25617	0.268262
GO:0000160	phosphorelay signal transduction system	biological_process	6	TRINITY_DN101222_c0_g1;TRINITY_DN109153_c0_g3;TRINITY_DN109582_c2_g1;TRINITY_DN109955_c0_g1;TRINITY_DN119458_c2_g4;TRINITY_DN121349_c0_g1;TRINITY_DN88414_c0_g2	7	3857	35	25617	0.268262
GO:0010200	response to chitin	biological_process	7	TRINITY_DN106502_c1_g1;TRINITY_DN107240_c0_g1;TRINITY_DN107900_c1_g1;TRINITY_DN110445_c0_g2;TRINITY_DN112227_c0_g1;TRINITY_DN112423_c0_g2;TRINITY_DN115885_c1_g1;TRINITY_DN117880_c1_g1;TRINITY_DN117926_c0_g1;TRINITY_DN117964_c0_g2;TRINITY_DN118942_c2_g1;TRINITY_DN120078_c3_g1;TRINITY_DN120384_c0_g1;TRINITY_DN120384_c0_g2;TRINITY_DN121978_c0_g1;TRINITY_DN123194_c1_g2;TRINITY_DN91882_c0_g1;TRINITY_D…	20	3857	115	25617	0.277188
GO:0015035	protein disulfide oxidoreductase activity	molecular_function	7	TRINITY_DN102225_c0_g2;TRINITY_DN103573_c1_g2;TRINITY_DN103978_c0_g1;TRINITY_DN108477_c0_g2;TRINITY_DN109032_c4_g4;TRINITY_DN115892_c0_g1;TRINITY_DN116450_c1_g1;TRINITY_DN119795_c1_g1;TRINITY_DN90776_c0_g1;TRINITY_DN95942_c0_g2;TRINITY_DN97169_c1_g1;TRINITY_DN98020_c0_g1;TRINITY_DN98285_c1_g4;TRINITY_DN98851_c0_g1;TRINITY_DN99789_c0_g1	15	3857	84	25617	0.277603
GO:0032088	negative regulation of NF-kappaB transcription factor activity	biological_process	7	TRINITY_DN112578_c1_g1	1	3857	2	25617	0.278464
GO:0010490	UDP-4-keto-rhamnose-4-keto-reductase activity	molecular_function	7	TRINITY_DN106323_c0_g1	1	3857	2	25617	0.278464
GO:0051512	positive regulation of unidimensional cell growth	biological_process	8	TRINITY_DN118425_c5_g2	1	3857	2	25617	0.278464
GO:0050311	sulfite reductase (ferredoxin) activity	molecular_function	7	TRINITY_DN117932_c0_g1	1	3857	2	25617	0.278464
GO:0009496	plastoquinol--plastocyanin reductase activity	molecular_function	7	TRINITY_DN94904_c0_g1	1	3857	2	25617	0.278464
GO:0010326	methionine-oxo-acid transaminase activity	molecular_function	7	TRINITY_DN119713_c0_g1	1	3857	2	25617	0.278464
GO:0010423	negative regulation of brassinosteroid biosynthetic process	biological_process	11	TRINITY_DN118229_c7_g1	1	3857	2	25617	0.278464
GO:0006569	tryptophan catabolic process	biological_process	11	TRINITY_DN119713_c0_g1	1	3857	2	25617	0.278464
GO:0000779	condensed chromosome, centromeric region	cellular_component	8	TRINITY_DN92149_c2_g2	1	3857	2	25617	0.278464
GO:0045721	negative regulation of gluconeogenesis	biological_process	11	TRINITY_DN110820_c0_g2	1	3857	2	25617	0.278464
GO:0008615	pyridoxine biosynthetic process	biological_process	7	TRINITY_DN93651_c0_g1	1	3857	2	25617	0.278464
GO:0008275	gamma-tubulin small complex	cellular_component	5	TRINITY_DN110658_c1_g1	1	3857	2	25617	0.278464
GO:0010032	meiotic chromosome condensation	biological_process	10	TRINITY_DN92149_c2_g2	1	3857	2	25617	0.278464
GO:0019822	P4 peroxisome	cellular_component	8	TRINITY_DN113573_c0_g3	1	3857	2	25617	0.278464
GO:1904526	regulation of microtubule binding	biological_process	7	TRINITY_DN111820_c0_g1	1	3857	2	25617	0.278464
GO:0046922	peptide-O-fucosyltransferase activity	molecular_function	8	TRINITY_DN123852_c2_g1	1	3857	2	25617	0.278464
GO:0070217	transcription factor TFIIIB complex assembly	biological_process	8	TRINITY_DN91686_c0_g1	1	3857	2	25617	0.278464
GO:0019707	protein-cysteine S-acyltransferase activity	molecular_function	8	TRINITY_DN107436_c0_g1	1	3857	2	25617	0.278464
GO:0006522	alanine metabolic process	biological_process	11	TRINITY_DN95235_c2_g4	1	3857	2	25617	0.278464
GO:0033854	glutamate-prephenate aminotransferase activity	molecular_function	7	TRINITY_DN92983_c2_g2	1	3857	2	25617	0.278464
GO:0030931	heterotetrameric ADPG pyrophosphorylase complex	cellular_component	5	TRINITY_DN119253_c1_g1	1	3857	2	25617	0.278464
GO:0060151	peroxisome localization	biological_process	6	TRINITY_DN108149_c0_g3	1	3857	2	25617	0.278464
GO:0031542	positive regulation of anthocyanin biosynthetic process	biological_process	9	TRINITY_DN90468_c0_g2	1	3857	2	25617	0.278464
GO:0006069	ethanol oxidation	biological_process	8	TRINITY_DN107859_c0_g1	1	3857	2	25617	0.278464
GO:0008696	4-amino-4-deoxychorismate lyase activity	molecular_function	7	TRINITY_DN101039_c0_g1	1	3857	2	25617	0.278464
GO:0016540	protein autoprocessing	biological_process	9	TRINITY_DN103540_c0_g1	1	3857	2	25617	0.278464
GO:0015485	cholesterol binding	molecular_function	7	TRINITY_DN109990_c0_g2	1	3857	2	25617	0.278464
GO:0004044	amidophosphoribosyltransferase activity	molecular_function	7	TRINITY_DN123286_c0_g1	1	3857	2	25617	0.278464
GO:0004573	mannosyl-oligosaccharide glucosidase activity	molecular_function	8	TRINITY_DN118834_c1_g2	1	3857	2	25617	0.278464
GO:0000138	Golgi trans cisterna	cellular_component	8	TRINITY_DN107436_c0_g1	1	3857	2	25617	0.278464
GO:0004314	[acyl-carrier-protein] S-malonyltransferase activity	molecular_function	8	TRINITY_DN113983_c2_g2	1	3857	2	25617	0.278464
GO:1990619	histone H3-K9 deacetylation	biological_process	13	TRINITY_DN124946_c1_g3	1	3857	2	25617	0.278464
GO:0080177	plastoglobule organization	biological_process	5	TRINITY_DN111835_c1_g3	1	3857	2	25617	0.278464
GO:0005690	U4atac snRNP	cellular_component	8	TRINITY_DN118641_c0_g1	1	3857	2	25617	0.278464
GO:0051304	chromosome separation	biological_process	5	TRINITY_DN92149_c2_g2	1	3857	2	25617	0.278464
GO:0071287	cellular response to manganese ion	biological_process	8	TRINITY_DN118425_c5_g2	1	3857	2	25617	0.278464
GO:0061780	mitotic cohesin loading	biological_process	9	TRINITY_DN100433_c0_g1	1	3857	2	25617	0.278464
GO:0004103	choline kinase activity	molecular_function	7	TRINITY_DN110355_c1_g1	1	3857	2	25617	0.278464
GO:0046408	chlorophyll synthetase activity	molecular_function	7	TRINITY_DN104718_c1_g1	1	3857	2	25617	0.278464
GO:0006760	folic acid-containing compound metabolic process	biological_process	6	TRINITY_DN117715_c0_g3	1	3857	2	25617	0.278464
GO:0090421	embryonic meristem initiation	biological_process	5	TRINITY_DN123375_c3_g1	1	3857	2	25617	0.278464
GO:0006121	mitochondrial electron transport, succinate to ubiquinone	biological_process	8	TRINITY_DN91062_c0_g1	1	3857	2	25617	0.278464
GO:0048448	stamen morphogenesis	biological_process	6	TRINITY_DN108160_c1_g2	1	3857	2	25617	0.278464
GO:0048827	phyllome development	biological_process	6	TRINITY_DN124005_c3_g1	1	3857	2	25617	0.278464
GO:0046939	nucleotide phosphorylation	biological_process	8	TRINITY_DN102923_c1_g1	1	3857	2	25617	0.278464
GO:0035061	interchromatin granule	cellular_component	8	TRINITY_DN110953_c0_g1	1	3857	2	25617	0.278464
GO:0010297	heteropolysaccharide binding	molecular_function	6	TRINITY_DN121198_c1_g1	1	3857	2	25617	0.278464
GO:0003839	gamma-glutamylcyclotransferase activity	molecular_function	7	TRINITY_DN114439_c0_g1	1	3857	2	25617	0.278464
GO:0004638	phosphoribosylaminoimidazole carboxylase activity	molecular_function	7	TRINITY_DN123788_c8_g2	1	3857	2	25617	0.278464
GO:0009531	secondary cell wall	cellular_component	7	TRINITY_DN112496_c1_g1	1	3857	2	25617	0.278464
GO:0009095	aromatic amino acid family biosynthetic process, prephenate pathway	biological_process	11	TRINITY_DN92983_c2_g2	1	3857	2	25617	0.278464
GO:0008831	dTDP-4-dehydrorhamnose reductase activity	molecular_function	7	TRINITY_DN106323_c0_g1	1	3857	2	25617	0.278464
GO:0007157	heterophilic cell-cell adhesion via plasma membrane cell adhesion molecules	biological_process	7	TRINITY_DN97485_c0_g1	1	3857	2	25617	0.278464
GO:0032720	negative regulation of tumor necrosis factor production	biological_process	9	TRINITY_DN112578_c1_g1	1	3857	2	25617	0.278464
GO:0005761	mitochondrial ribosome	cellular_component	8	TRINITY_DN105672_c0_g2	1	3857	2	25617	0.278464
GO:0070207	protein homotrimerization	biological_process	9	TRINITY_DN108767_c0_g2	1	3857	2	25617	0.278464
GO:0006531	aspartate metabolic process	biological_process	11	TRINITY_DN95235_c2_g4	1	3857	2	25617	0.278464
GO:0016480	negative regulation of transcription by RNA polymerase III	biological_process	10	TRINITY_DN91686_c0_g1	1	3857	2	25617	0.278464
GO:0006982	response to lipid hydroperoxide	biological_process	6	TRINITY_DN93651_c0_g1	1	3857	2	25617	0.278464
GO:0008290	F-actin capping protein complex	cellular_component	4	TRINITY_DN103233_c0_g2	1	3857	2	25617	0.278464
GO:0034990	nuclear mitotic cohesin complex	cellular_component	6	TRINITY_DN100433_c0_g1	1	3857	2	25617	0.278464
GO:0031210	phosphatidylcholine binding	molecular_function	6	TRINITY_DN103833_c7_g1	1	3857	2	25617	0.278464
GO:0001523	retinoid metabolic process	biological_process	10	TRINITY_DN107859_c0_g1	1	3857	2	25617	0.278464
GO:0010489	UDP-4-keto-6-deoxy-glucose-3,5-epimerase activity	molecular_function	7	TRINITY_DN106323_c0_g1	1	3857	2	25617	0.278464
GO:0018826	methionine gamma-lyase activity	molecular_function	6	TRINITY_DN115296_c1_g1	1	3857	2	25617	0.278464
GO:0033853	aspartate-prephenate aminotransferase activity	molecular_function	7	TRINITY_DN92983_c2_g2	1	3857	2	25617	0.278464
GO:0071141	SMAD protein complex	cellular_component	5	TRINITY_DN112647_c1_g2	1	3857	2	25617	0.278464
GO:0010335	response to non-ionic osmotic stress	biological_process	6	TRINITY_DN93651_c0_g1	1	3857	2	25617	0.278464
GO:0060968	regulation of gene silencing	biological_process	8	TRINITY_DN115189_c2_g1	1	3857	2	25617	0.278464
GO:0010323	negative regulation of isopentenyl diphosphate biosynthetic process, methylerythritol 4-phosphate pathway	biological_process	9	TRINITY_DN122569_c0_g2	1	3857	2	25617	0.278464
GO:0008312	7S RNA binding	molecular_function	7	TRINITY_DN111860_c1_g1	1	3857	2	25617	0.278464
GO:0050567	glutaminyl-tRNA synthase (glutamine-hydrolyzing) activity	molecular_function	7	TRINITY_DN121259_c0_g1	1	3857	2	25617	0.278464
GO:0061776	topological DNA entrapment activity	molecular_function	8	TRINITY_DN100433_c0_g1	1	3857	2	25617	0.278464
GO:0000446	nucleoplasmic THO complex	cellular_component	5	TRINITY_DN107279_c0_g1	1	3857	2	25617	0.278464
GO:0031985	Golgi cisterna	cellular_component	7	TRINITY_DN109884_c1_g2	1	3857	2	25617	0.278464
GO:0045851	pH reduction	biological_process	11	TRINITY_DN115115_c0_g1	1	3857	2	25617	0.278464
GO:0010493	Lewis a epitope biosynthetic process	biological_process	9	TRINITY_DN118347_c0_g1	1	3857	2	25617	0.278464
GO:0043481	anthocyanin accumulation in tissues in response to UV light	biological_process	10	TRINITY_DN121863_c0_g1	1	3857	2	25617	0.278464
GO:0031143	pseudopodium	cellular_component	6	TRINITY_DN117403_c0_g1	1	3857	2	25617	0.278464
GO:0032934	sterol binding	molecular_function	6	TRINITY_DN114773_c2_g3	1	3857	2	25617	0.278464
GO:0009918	sterol delta7 reductase activity	molecular_function	6	TRINITY_DN113417_c1_g1	1	3857	2	25617	0.278464
GO:0031539	positive regulation of anthocyanin metabolic process	biological_process	7	TRINITY_DN117904_c1_g1	1	3857	2	25617	0.278464
GO:0003923	GPI-anchor transamidase activity	molecular_function	5	TRINITY_DN119597_c0_g2	1	3857	2	25617	0.278464
GO:0002100	tRNA wobble adenosine to inosine editing	biological_process	14	TRINITY_DN125109_c5_g2	1	3857	2	25617	0.278464
GO:0008153	para-aminobenzoic acid biosynthetic process	biological_process	11	TRINITY_DN101039_c0_g1	1	3857	2	25617	0.278464
GO:0004848	ureidoglycolate hydrolase activity	molecular_function	7	TRINITY_DN101507_c0_g4	1	3857	2	25617	0.278464
GO:0030385	ferredoxin:thioredoxin reductase activity	molecular_function	6	TRINITY_DN102106_c0_g1	1	3857	2	25617	0.278464
GO:0032116	SMC loading complex	cellular_component	4	TRINITY_DN117408_c0_g1	1	3857	2	25617	0.278464
GO:0019458	methionine catabolic process via 2-oxobutanoate	biological_process	12	TRINITY_DN115296_c1_g1	1	3857	2	25617	0.278464
GO:0070476	rRNA (guanine-N7)-methylation	biological_process	12	TRINITY_DN97445_c1_g1	1	3857	2	25617	0.278464
GO:0051646	mitochondrion localization	biological_process	6	TRINITY_DN108149_c0_g3	1	3857	2	25617	0.278464
GO:0004639	phosphoribosylaminoimidazolesuccinocarboxamide synthase activity	molecular_function	7	TRINITY_DN123788_c8_g2	1	3857	2	25617	0.278464
GO:0000957	mitochondrial RNA catabolic process	biological_process	10	TRINITY_DN122569_c0_g2	1	3857	2	25617	0.278464
GO:0036381	pyridoxal 5'-phosphate synthase (glutamine hydrolysing) activity	molecular_function	7	TRINITY_DN93651_c0_g1	1	3857	2	25617	0.278464
GO:0019750	chloroplast localization	biological_process	7	TRINITY_DN94073_c0_g1	1	3857	2	25617	0.278464
GO:0006617	SRP-dependent cotranslational protein targeting to membrane, signal sequence recognition	biological_process	8	TRINITY_DN111860_c1_g1	1	3857	2	25617	0.278464
GO:0055087	Ski complex	cellular_component	4	TRINITY_DN117145_c0_g1	1	3857	2	25617	0.278464
GO:0004357	glutamate-cysteine ligase activity	molecular_function	7	TRINITY_DN91254_c0_g1	1	3857	2	25617	0.278464
GO:0080038	positive regulation of cytokinin-activated signaling pathway	biological_process	9	TRINITY_DN83315_c0_g1	1	3857	2	25617	0.278464
GO:0070478	nuclear-transcribed mRNA catabolic process, 3'-5' exonucleolytic nonsense-mediated decay	biological_process	13	TRINITY_DN117145_c0_g1	1	3857	2	25617	0.278464
GO:0035861	site of double-strand break	cellular_component	7	TRINITY_DN102531_c0_g1	1	3857	2	25617	0.278464
GO:0070603	SWI/SNF superfamily-type complex	cellular_component	7	TRINITY_DN97554_c0_g1	1	3857	2	25617	0.278464
GO:0051409	response to nitrosative stress	biological_process	5	TRINITY_DN107859_c0_g1	1	3857	2	25617	0.278464
GO:0031054	pre-miRNA processing	biological_process	11	TRINITY_DN106099_c0_g1	1	3857	2	25617	0.278464
GO:0018444	translation release factor complex	cellular_component	4	TRINITY_DN98424_c0_g1	1	3857	2	25617	0.278464
GO:0003016	respiratory system process	biological_process	5	TRINITY_DN107859_c0_g1	1	3857	2	25617	0.278464
GO:0008177	succinate dehydrogenase (ubiquinone) activity	molecular_function	7	TRINITY_DN91062_c0_g1	1	3857	2	25617	0.278464
GO:0018738	S-formylglutathione hydrolase activity	molecular_function	7	TRINITY_DN111914_c3_g6	1	3857	2	25617	0.278464
GO:0046570	methylthioribulose 1-phosphate dehydratase activity	molecular_function	7	TRINITY_DN116954_c0_g1	1	3857	2	25617	0.278464
GO:0043874	acireductone synthase activity	molecular_function	8	TRINITY_DN116954_c0_g1	1	3857	2	25617	0.278464
GO:0061775	cohesin ATPase activity	molecular_function	12	TRINITY_DN100433_c0_g1	1	3857	2	25617	0.278464
GO:0060560	developmental growth involved in morphogenesis	biological_process	5	TRINITY_DN115644_c0_g1	1	3857	2	25617	0.278464
GO:0043153	entrainment of circadian clock by photoperiod	biological_process	8	TRINITY_DN109166_c2_g2	1	3857	2	25617	0.278464
GO:0004055	argininosuccinate synthase activity	molecular_function	6	TRINITY_DN108166_c0_g6	1	3857	2	25617	0.278464
GO:0008830	dTDP-4-dehydrorhamnose 3,5-epimerase activity	molecular_function	7	TRINITY_DN106323_c0_g1	1	3857	2	25617	0.278464
GO:1901997	negative regulation of indoleacetic acid biosynthetic process via tryptophan	biological_process	10	TRINITY_DN119713_c0_g1	1	3857	2	25617	0.278464
GO:0009661	chromoplast organization	biological_process	7	TRINITY_DN100308_c0_g1	1	3857	2	25617	0.278464
GO:0071171	site-specific DNA replication termination at RTS1 barrier	biological_process	10	TRINITY_DN113567_c0_g1	1	3857	2	25617	0.278464
GO:0018119	peptidyl-cysteine S-nitrosylation	biological_process	10	TRINITY_DN107859_c0_g1	1	3857	2	25617	0.278464
GO:1902039	negative regulation of seed dormancy process	biological_process	11	TRINITY_DN117565_c0_g2	1	3857	2	25617	0.278464
GO:0009544	chloroplast ATP synthase complex	cellular_component	9	TRINITY_DN90610_c0_g1	1	3857	2	25617	0.278464
GO:0071566	UFM1 activating enzyme activity	molecular_function	7	TRINITY_DN104511_c0_g1	1	3857	2	25617	0.278464
GO:0031396	regulation of protein ubiquitination	biological_process	10	TRINITY_DN121493_c0_g1	1	3857	2	25617	0.278464
GO:0046604	positive regulation of mitotic centrosome separation	biological_process	10	TRINITY_DN105285_c3_g1	1	3857	2	25617	0.278464
GO:0000994	RNA polymerase III core binding	molecular_function	8	TRINITY_DN91686_c0_g1	1	3857	2	25617	0.278464
GO:0006558	L-phenylalanine metabolic process	biological_process	10	TRINITY_DN119713_c0_g1	1	3857	2	25617	0.278464
GO:0005324	long-chain fatty acid transporter activity	molecular_function	5	TRINITY_DN120776_c0_g1	1	3857	2	25617	0.278464
GO:0004654	polyribonucleotide nucleotidyltransferase activity	molecular_function	7	TRINITY_DN122569_c0_g2	1	3857	2	25617	0.278464
GO:0009892	negative regulation of metabolic process	biological_process	6	TRINITY_DN114542_c0_g1	1	3857	2	25617	0.278464
GO:0050355	triphosphatase activity	molecular_function	8	TRINITY_DN100564_c0_g2	1	3857	2	25617	0.278464
GO:0043144	snoRNA processing	biological_process	11	TRINITY_DN121625_c2_g1	1	3857	2	25617	0.278464
GO:0046084	adenine biosynthetic process	biological_process	11	TRINITY_DN123788_c8_g2	1	3857	2	25617	0.278464
GO:0006570	tyrosine metabolic process	biological_process	10	TRINITY_DN119713_c0_g1	1	3857	2	25617	0.278464
GO:0034088	maintenance of mitotic sister chromatid cohesion	biological_process	6	TRINITY_DN117408_c0_g1	1	3857	2	25617	0.278464
GO:0048256	flap endonuclease activity	molecular_function	9	TRINITY_DN98915_c0_g1	1	3857	2	25617	0.278464
GO:1904667	negative regulation of ubiquitin protein ligase activity	biological_process	13	TRINITY_DN112986_c1_g1	1	3857	2	25617	0.278464
GO:0000053	argininosuccinate metabolic process	biological_process	6	TRINITY_DN108166_c0_g6	1	3857	2	25617	0.278464
GO:0010371	regulation of gibberellin biosynthetic process	biological_process	8	TRINITY_DN102639_c1_g1	1	3857	2	25617	0.278464
GO:0000808	origin recognition complex	cellular_component	4	TRINITY_DN120569_c0_g2	1	3857	2	25617	0.278464
GO:0006568	tryptophan metabolic process	biological_process	10	TRINITY_DN119713_c0_g1	1	3857	2	25617	0.278464
GO:0050362	L-tryptophan:2-oxoglutarate aminotransferase activity	molecular_function	8	TRINITY_DN119713_c0_g1	1	3857	2	25617	0.278464
GO:0004648	O-phospho-L-serine:2-oxoglutarate aminotransferase activity	molecular_function	7	TRINITY_DN108495_c0_g1	1	3857	2	25617	0.278464
GO:0009512	cytochrome b6f complex	cellular_component	6	TRINITY_DN94904_c0_g1	1	3857	2	25617	0.278464
GO:0030983	mismatched DNA binding	molecular_function	8	TRINITY_DN123625_c3_g1	1	3857	2	25617	0.278464
GO:0018467	formaldehyde dehydrogenase activity	molecular_function	8	TRINITY_DN107859_c0_g1	1	3857	2	25617	0.278464
GO:0070935	3'-UTR-mediated mRNA stabilization	biological_process	12	TRINITY_DN107934_c2_g1	1	3857	2	25617	0.278464
GO:0016836	hydro-lyase activity	molecular_function	6	TRINITY_DN110751_c0_g1	1	3857	2	25617	0.278464
GO:0008278	cohesin complex	cellular_component	4	TRINITY_DN119052_c0_g1	1	3857	2	25617	0.278464
GO:0036263	L-DOPA monooxygenase activity	molecular_function	8	TRINITY_DN100677_c0_g1	1	3857	2	25617	0.278464
GO:0010450	inflorescence meristem growth	biological_process	5	TRINITY_DN108160_c1_g2	1	3857	2	25617	0.278464
GO:0090527	actin filament reorganization	biological_process	7	TRINITY_DN123783_c0_g1	1	3857	2	25617	0.278464
GO:0006671	phytosphingosine metabolic process	biological_process	7	TRINITY_DN102624_c0_g1	1	3857	2	25617	0.278464
GO:0000023	maltose metabolic process	biological_process	8	TRINITY_DN121198_c1_g1	1	3857	2	25617	0.278464
GO:0008251	tRNA-specific adenosine deaminase activity	molecular_function	8	TRINITY_DN125109_c5_g2	1	3857	2	25617	0.278464
GO:0090414	molybdate ion export from vacuole	biological_process	10	TRINITY_DN119676_c0_g1	1	3857	2	25617	0.278464
GO:0006829	zinc II ion transport	biological_process	10	TRINITY_DN120761_c0_g2	1	3857	2	25617	0.278464
GO:1990072	TRAPPIII protein complex	cellular_component	6	TRINITY_DN122091_c1_g1	1	3857	2	25617	0.278464
GO:0047810	D-alanine:2-oxoglutarate aminotransferase activity	molecular_function	7	TRINITY_DN101039_c0_g1	1	3857	2	25617	0.278464
GO:1902171	regulation of tocopherol cyclase activity	biological_process	7	TRINITY_DN111835_c1_g3	1	3857	2	25617	0.278464
GO:0047918	GDP-mannose 3,5-epimerase activity	molecular_function	7	TRINITY_DN119428_c1_g2	1	3857	2	25617	0.278464
GO:0002182	cytoplasmic translational elongation	biological_process	9	TRINITY_DN119360_c2_g2	1	3857	2	25617	0.278464
GO:0004105	choline-phosphate cytidylyltransferase activity	molecular_function	8	TRINITY_DN109293_c2_g1	1	3857	2	25617	0.278464
GO:0004109	coproporphyrinogen oxidase activity	molecular_function	7	TRINITY_DN114074_c0_g1	1	3857	2	25617	0.278464
GO:0006695	cholesterol biosynthetic process	biological_process	9	TRINITY_DN113417_c1_g1	1	3857	2	25617	0.278464
GO:1903086	negative regulation of sinapate ester biosynthetic process	biological_process	9	TRINITY_DN110654_c1_g2	1	3857	2	25617	0.278464
GO:0030288	outer membrane-bounded periplasmic space	cellular_component	5	TRINITY_DN111077_c0_g3	1	3857	2	25617	0.278464
GO:0016314	phosphatidylinositol-3,4,5-trisphosphate 3-phosphatase activity	molecular_function	10	TRINITY_DN114455_c4_g1	1	3857	2	25617	0.278464
GO:2001253	regulation of histone H3-K36 trimethylation	biological_process	12	TRINITY_DN120724_c1_g1	1	3857	2	25617	0.278464
GO:0004503	monophenol monooxygenase activity	molecular_function	7	TRINITY_DN100677_c0_g1	1	3857	2	25617	0.278464
GO:0009700	indole phytoalexin biosynthetic process	biological_process	8	TRINITY_DN91254_c0_g1	1	3857	2	25617	0.278464
GO:0051721	protein phosphatase 2A binding	molecular_function	8	TRINITY_DN115430_c0_g1	1	3857	2	25617	0.278464
GO:0045777	positive regulation of blood pressure	biological_process	6	TRINITY_DN107859_c0_g1	1	3857	2	25617	0.278464
GO:1902979	mitotic DNA replication termination	biological_process	11	TRINITY_DN113567_c0_g1	1	3857	2	25617	0.278464
GO:0006225	UDP biosynthetic process	biological_process	12	TRINITY_DN108034_c0_g1	1	3857	2	25617	0.278464
GO:0044419	interspecies interaction between organisms	biological_process	4	TRINITY_DN98976_c0_g1	1	3857	2	25617	0.278464
GO:0051903	S-(hydroxymethyl)glutathione dehydrogenase activity	molecular_function	7	TRINITY_DN107859_c0_g1	1	3857	2	25617	0.278464
GO:0009649	entrainment of circadian clock	biological_process	5	TRINITY_DN111319_c2_g2	1	3857	2	25617	0.278464
GO:0070921	regulation of production of siRNA involved in chromatin silencing by small RNA	biological_process	11	TRINITY_DN110093_c1_g1	1	3857	2	25617	0.278464
GO:0006103	2-oxoglutarate metabolic process	biological_process	9	TRINITY_DN95235_c2_g4	1	3857	2	25617	0.278464
GO:0000221	vacuolar proton-transporting V-type ATPase, V1 domain	cellular_component	7	TRINITY_DN97985_c0_g1	1	3857	2	25617	0.278464
GO:0051258	protein polymerization	biological_process	8	TRINITY_DN123844_c3_g1	1	3857	2	25617	0.278464
GO:0102502	ADP-glucose-starch glucosyltransferase activity	molecular_function	9	TRINITY_DN121965_c0_g2	1	3857	2	25617	0.278464
GO:0031618	nuclear pericentric heterochromatin	cellular_component	9	TRINITY_DN115189_c2_g1	1	3857	2	25617	0.278464
GO:0010488	UDP-galactose:N-glycan beta-1,3-galactosyltransferase activity	molecular_function	8	TRINITY_DN118347_c0_g1	1	3857	2	25617	0.278464
GO:0048838	release of seed from dormancy	biological_process	6	TRINITY_DN117565_c0_g2	1	3857	2	25617	0.278464
GO:0006281	DNA repair	biological_process	8	TRINITY_DN100384_c5_g1;TRINITY_DN104413_c0_g2;TRINITY_DN105153_c2_g1;TRINITY_DN107748_c0_g1;TRINITY_DN112226_c0_g1;TRINITY_DN113042_c3_g1;TRINITY_DN115135_c0_g1;TRINITY_DN115197_c0_g1;TRINITY_DN115469_c2_g1;TRINITY_DN115574_c1_g1;TRINITY_DN117872_c1_g2;TRINITY_DN118082_c0_g1;TRINITY_DN119052_c0_g1;TRINITY_DN120626_c2_g1;TRINITY_DN121115_c1_g1;TRINITY_DN122252_c2_g4;TRINITY_DN122799_c1_g1;TRINITY_…	30	3857	178	25617	0.279607
GO:0009851	auxin biosynthetic process	biological_process	6	TRINITY_DN111205_c2_g2;TRINITY_DN115491_c0_g4;TRINITY_DN119713_c0_g1;TRINITY_DN124687_c1_g1	4	3857	18	25617	0.282125
GO:0006418	tRNA aminoacylation for protein translation	biological_process	12	TRINITY_DN108386_c0_g1;TRINITY_DN109107_c0_g1;TRINITY_DN119788_c0_g2;TRINITY_DN124702_c0_g1	4	3857	18	25617	0.282125
GO:0006914	autophagy	biological_process	6	TRINITY_DN110155_c1_g1;TRINITY_DN113643_c0_g1;TRINITY_DN114448_c1_g3;TRINITY_DN121264_c2_g2	4	3857	18	25617	0.282125
GO:0035304	regulation of protein dephosphorylation	biological_process	9	TRINITY_DN111847_c1_g5;TRINITY_DN99724_c0_g5	2	3857	7	25617	0.284988
GO:0010587	miRNA catabolic process	biological_process	11	TRINITY_DN117347_c0_g2;TRINITY_DN97643_c0_g3	2	3857	7	25617	0.284988
GO:0060261	positive regulation of transcription initiation from RNA polymerase II promoter	biological_process	11	TRINITY_DN102159_c0_g3;TRINITY_DN122036_c3_g2	2	3857	7	25617	0.284988
GO:0000210	NAD+ diphosphatase activity	molecular_function	9	TRINITY_DN111683_c0_g1;TRINITY_DN122777_c1_g1	2	3857	7	25617	0.284988
GO:0010199	organ boundary specification between lateral organs and the meristem	biological_process	7	TRINITY_DN113965_c0_g1;TRINITY_DN124388_c5_g2	2	3857	7	25617	0.284988
GO:0007032	endosome organization	biological_process	7	TRINITY_DN105525_c0_g2;TRINITY_DN116796_c0_g2	2	3857	7	25617	0.284988
GO:0000339	RNA cap binding	molecular_function	7	TRINITY_DN107307_c2_g1;TRINITY_DN96004_c1_g1	2	3857	7	25617	0.284988
GO:0080009	mRNA methylation	biological_process	11	TRINITY_DN120596_c0_g2;TRINITY_DN92057_c1_g1	2	3857	7	25617	0.284988
GO:0019912	cyclin-dependent protein kinase activating kinase activity	molecular_function	8	TRINITY_DN102456_c1_g1;TRINITY_DN122736_c1_g1	2	3857	7	25617	0.284988
GO:0033617	mitochondrial respiratory chain complex IV assembly	biological_process	10	TRINITY_DN101709_c0_g3;TRINITY_DN99282_c1_g2	2	3857	7	25617	0.284988
GO:0010289	homogalacturonan biosynthetic process	biological_process	9	TRINITY_DN105028_c0_g2;TRINITY_DN91572_c0_g1	2	3857	7	25617	0.284988
GO:0016297	acyl-[acyl-carrier-protein] hydrolase activity	molecular_function	8	TRINITY_DN100463_c0_g1;TRINITY_DN110998_c0_g2	2	3857	7	25617	0.284988
GO:0007129	synapsis	biological_process	8	TRINITY_DN117444_c0_g1;TRINITY_DN122241_c2_g1	2	3857	7	25617	0.284988
GO:0016075	rRNA catabolic process	biological_process	11	TRINITY_DN106573_c1_g1;TRINITY_DN123874_c2_g1	2	3857	7	25617	0.284988
GO:0010277	chlorophyllide a oxygenase [overall] activity	molecular_function	7	TRINITY_DN110448_c1_g1;TRINITY_DN111509_c2_g1	2	3857	7	25617	0.284988
GO:0005816	spindle pole body	cellular_component	7	TRINITY_DN110658_c1_g1;TRINITY_DN124836_c2_g1	2	3857	7	25617	0.284988
GO:0008175	tRNA methyltransferase activity	molecular_function	8	TRINITY_DN105313_c0_g1;TRINITY_DN119418_c0_g1	2	3857	7	25617	0.284988
GO:0010508	positive regulation of autophagy	biological_process	9	TRINITY_DN107900_c1_g1;TRINITY_DN113643_c0_g1	2	3857	7	25617	0.284988
GO:0031683	G-protein beta/gamma-subunit complex binding	molecular_function	5	TRINITY_DN116567_c0_g2;TRINITY_DN98171_c1_g3	2	3857	7	25617	0.284988
GO:0008138	protein tyrosine/serine/threonine phosphatase activity	molecular_function	9	TRINITY_DN114455_c4_g1;TRINITY_DN91960_c1_g3	2	3857	7	25617	0.284988
GO:0015937	coenzyme A biosynthetic process	biological_process	8	TRINITY_DN122216_c1_g1;TRINITY_DN97056_c0_g2	2	3857	7	25617	0.284988
GO:0019563	glycerol catabolic process	biological_process	9	TRINITY_DN108680_c0_g1;TRINITY_DN113290_c2_g3	2	3857	7	25617	0.284988
GO:0001678	cellular glucose homeostasis	biological_process	9	TRINITY_DN116562_c1_g1;TRINITY_DN121701_c1_g2	2	3857	7	25617	0.284988
GO:0019200	carbohydrate kinase activity	molecular_function	7	TRINITY_DN104191_c1_g2;TRINITY_DN123593_c6_g1	2	3857	7	25617	0.284988
GO:0006793	phosphorus metabolic process	biological_process	5	TRINITY_DN111161_c0_g2;TRINITY_DN95552_c2_g1	2	3857	7	25617	0.284988
GO:0005719	nuclear euchromatin	cellular_component	8	TRINITY_DN121115_c1_g1;TRINITY_DN97801_c1_g2	2	3857	7	25617	0.284988
GO:0043572	plastid fission	biological_process	7	TRINITY_DN117994_c2_g1;TRINITY_DN124900_c2_g1	2	3857	7	25617	0.284988
GO:0000710	meiotic mismatch repair	biological_process	10	TRINITY_DN123468_c5_g1;TRINITY_DN123625_c3_g1	2	3857	7	25617	0.284988
GO:0004455	ketol-acid reductoisomerase activity	molecular_function	7	TRINITY_DN117426_c3_g1;TRINITY_DN122099_c3_g2	2	3857	7	25617	0.284988
GO:0003747	translation release factor activity	molecular_function	9	TRINITY_DN100844_c0_g1;TRINITY_DN98424_c0_g1	2	3857	7	25617	0.284988
GO:0004020	adenylylsulfate kinase activity	molecular_function	7	TRINITY_DN109342_c2_g6;TRINITY_DN91647_c0_g1	2	3857	7	25617	0.284988
GO:0019158	mannokinase activity	molecular_function	8	TRINITY_DN116562_c1_g1;TRINITY_DN121701_c1_g2	2	3857	7	25617	0.284988
GO:0000439	core TFIIH complex	cellular_component	7	TRINITY_DN107748_c0_g1;TRINITY_DN115437_c0_g1	2	3857	7	25617	0.284988
GO:0004013	adenosylhomocysteinase activity	molecular_function	7	TRINITY_DN124549_c8_g1;TRINITY_DN98571_c1_g2	2	3857	7	25617	0.284988
GO:0032876	negative regulation of DNA endoreduplication	biological_process	9	TRINITY_DN101005_c0_g3;TRINITY_DN111099_c0_g2	2	3857	7	25617	0.284988
GO:0010290	chlorophyll catabolite transmembrane transporter activity	molecular_function	5	TRINITY_DN123607_c4_g1;TRINITY_DN124651_c1_g2	2	3857	7	25617	0.284988
GO:0043015	gamma-tubulin binding	molecular_function	7	TRINITY_DN110658_c1_g1;TRINITY_DN124836_c2_g1	2	3857	7	25617	0.284988
GO:0009970	cellular response to sulfate starvation	biological_process	9	TRINITY_DN115296_c1_g1;TRINITY_DN123133_c3_g2	2	3857	7	25617	0.284988
GO:0035619	root hair tip	cellular_component	6	TRINITY_DN108149_c0_g3;TRINITY_DN116736_c0_g1	2	3857	7	25617	0.284988
GO:0090307	mitotic spindle assembly	biological_process	10	TRINITY_DN110658_c1_g1;TRINITY_DN124836_c2_g1	2	3857	7	25617	0.284988
GO:0015431	glutathione S-conjugate-exporting ATPase activity	molecular_function	10	TRINITY_DN123607_c4_g1;TRINITY_DN124651_c1_g2	2	3857	7	25617	0.284988
GO:0007188	adenylate cyclase-modulating G-protein coupled receptor signaling pathway	biological_process	7	TRINITY_DN116567_c0_g2;TRINITY_DN98171_c1_g3	2	3857	7	25617	0.284988
GO:0071541	eukaryotic translation initiation factor 3 complex, eIF3m	cellular_component	5	TRINITY_DN107442_c0_g1;TRINITY_DN94437_c1_g1	2	3857	7	25617	0.284988
GO:0045333	cellular respiration	biological_process	7	TRINITY_DN110593_c1_g1;TRINITY_DN112407_c1_g1	2	3857	7	25617	0.284988
GO:0008289	lipid binding	molecular_function	4	TRINITY_DN100608_c0_g1;TRINITY_DN101719_c1_g5;TRINITY_DN106677_c1_g1;TRINITY_DN109117_c3_g1;TRINITY_DN109521_c0_g3;TRINITY_DN109578_c2_g2;TRINITY_DN109720_c1_g3;TRINITY_DN109965_c0_g5;TRINITY_DN110662_c0_g1;TRINITY_DN111589_c0_g1;TRINITY_DN113175_c1_g1;TRINITY_DN113975_c0_g5;TRINITY_DN114418_c1_g2;TRINITY_DN114773_c2_g4;TRINITY_DN116546_c0_g2;TRINITY_DN116772_c1_g3;TRINITY_DN119722_c1_g2;TRINITY_…	25	3857	147	25617	0.285706
GO:0006470	protein dephosphorylation	biological_process	9	TRINITY_DN100908_c0_g1;TRINITY_DN100954_c1_g1;TRINITY_DN104041_c0_g2;TRINITY_DN106424_c0_g1;TRINITY_DN111820_c0_g1;TRINITY_DN111886_c1_g3;TRINITY_DN111935_c0_g3;TRINITY_DN112860_c0_g1;TRINITY_DN114570_c0_g1;TRINITY_DN115678_c0_g3;TRINITY_DN115787_c1_g1;TRINITY_DN116260_c2_g1;TRINITY_DN117565_c0_g2;TRINITY_DN117565_c0_g4;TRINITY_DN118011_c0_g1;TRINITY_DN124048_c5_g1;TRINITY_DN91710_c0_g1;TRINITY_D…	25	3857	147	25617	0.285706
GO:0006887	exocytosis	biological_process	7	TRINITY_DN102109_c0_g1;TRINITY_DN103930_c0_g2;TRINITY_DN105944_c0_g1;TRINITY_DN106707_c1_g1;TRINITY_DN106726_c0_g2;TRINITY_DN108425_c0_g1;TRINITY_DN113807_c0_g2;TRINITY_DN113807_c0_g3;TRINITY_DN113936_c1_g1;TRINITY_DN118689_c0_g1;TRINITY_DN121803_c1_g4	11	3857	60	25617	0.287826
GO:0061512	protein localization to cilium	biological_process	8	TRINITY_DN112596_c0_g2;TRINITY_DN115266_c2_g1;TRINITY_DN117688_c0_g2;TRINITY_DN117885_c0_g1;TRINITY_DN96285_c1_g5	5	3857	24	25617	0.289337
GO:0004177	aminopeptidase activity	molecular_function	8	TRINITY_DN103193_c0_g1;TRINITY_DN110611_c1_g1;TRINITY_DN119189_c3_g2;TRINITY_DN121600_c1_g1;TRINITY_DN124364_c8_g1	5	3857	24	25617	0.289337
GO:0005929	cilium	cellular_component	4	TRINITY_DN112596_c0_g2;TRINITY_DN115266_c2_g1;TRINITY_DN117688_c0_g2;TRINITY_DN117885_c0_g1;TRINITY_DN96285_c1_g5	5	3857	24	25617	0.289337
GO:0006879	cellular iron ion homeostasis	biological_process	12	TRINITY_DN113120_c6_g1;TRINITY_DN116391_c0_g1;TRINITY_DN119047_c2_g1;TRINITY_DN120542_c1_g4;TRINITY_DN88931_c0_g1	5	3857	24	25617	0.289337
GO:0009966	regulation of signal transduction	biological_process	7	TRINITY_DN104349_c0_g1;TRINITY_DN112881_c1_g1;TRINITY_DN112881_c2_g3;TRINITY_DN118006_c0_g3;TRINITY_DN120796_c0_g1	5	3857	24	25617	0.289337
GO:0004857	enzyme inhibitor activity	molecular_function	5	TRINITY_DN103362_c0_g2;TRINITY_DN107878_c3_g3;TRINITY_DN123995_c6_g4;TRINITY_DN79573_c0_g1;TRINITY_DN95942_c0_g2	5	3857	24	25617	0.289337
GO:0002181	cytoplasmic translation	biological_process	9	TRINITY_DN102116_c2_g1;TRINITY_DN110026_c0_g1;TRINITY_DN110551_c1_g1;TRINITY_DN110604_c0_g4;TRINITY_DN114145_c1_g5;TRINITY_DN86437_c0_g1;TRINITY_DN89556_c0_g2;TRINITY_DN93324_c3_g1;TRINITY_DN95285_c0_g4;TRINITY_DN97298_c0_g1;TRINITY_DN98019_c0_g1;TRINITY_DN98232_c1_g4;TRINITY_DN98902_c2_g1;TRINITY_DN98902_c4_g1;TRINITY_DN99738_c0_g1;TRINITY_DN99738_c0_g2	16	3857	91	25617	0.29033
GO:0009553	embryo sac development	biological_process	6	TRINITY_DN102495_c0_g2;TRINITY_DN107703_c4_g2;TRINITY_DN109854_c0_g2;TRINITY_DN110904_c0_g2;TRINITY_DN115014_c0_g1;TRINITY_DN121509_c0_g1;TRINITY_DN123404_c1_g3;TRINITY_DN124846_c5_g6;TRINITY_DN90468_c0_g2	9	3857	48	25617	0.291708
GO:0090630	activation of GTPase activity	biological_process	9	TRINITY_DN113432_c0_g1;TRINITY_DN114383_c1_g4;TRINITY_DN114906_c0_g2;TRINITY_DN114979_c1_g2;TRINITY_DN120372_c0_g1;TRINITY_DN121264_c2_g2	6	3857	30	25617	0.292448
GO:0090406	pollen tube	cellular_component	6	TRINITY_DN107083_c0_g1;TRINITY_DN122164_c1_g2;TRINITY_DN124991_c3_g1;TRINITY_DN124991_c3_g3;TRINITY_DN88706_c0_g1;TRINITY_DN92363_c0_g1	6	3857	30	25617	0.292448
GO:0048481	plant ovule development	biological_process	5	TRINITY_DN105276_c0_g1;TRINITY_DN115810_c2_g1;TRINITY_DN119788_c0_g2;TRINITY_DN120570_c2_g1;TRINITY_DN121159_c2_g1;TRINITY_DN121159_c2_g3;TRINITY_DN121578_c0_g1;TRINITY_DN122692_c3_g2	8	3857	42	25617	0.292937
GO:0046323	glucose import	biological_process	12	TRINITY_DN101674_c2_g1;TRINITY_DN109975_c0_g1;TRINITY_DN113903_c1_g1;TRINITY_DN117707_c0_g2;TRINITY_DN123232_c3_g2;TRINITY_DN123917_c4_g2;TRINITY_DN86480_c0_g1;TRINITY_DN93401_c0_g1	8	3857	42	25617	0.292937
GO:0005528	FK506 binding	molecular_function	6	TRINITY_DN103336_c2_g5;TRINITY_DN107331_c2_g1;TRINITY_DN109082_c3_g1;TRINITY_DN111293_c1_g2;TRINITY_DN123007_c0_g1;TRINITY_DN124314_c2_g2;TRINITY_DN90806_c0_g1	7	3857	36	25617	0.293347
GO:0007010	cytoskeleton organization	biological_process	6	TRINITY_DN109584_c2_g1;TRINITY_DN109584_c2_g2;TRINITY_DN110667_c0_g2;TRINITY_DN112183_c0_g3;TRINITY_DN112953_c1_g2;TRINITY_DN114913_c0_g2;TRINITY_DN121969_c1_g3	7	3857	36	25617	0.293347
GO:0005834	heterotrimeric G-protein complex	cellular_component	5	TRINITY_DN100579_c2_g1;TRINITY_DN101193_c3_g1;TRINITY_DN102026_c0_g1;TRINITY_DN102286_c0_g1;TRINITY_DN109559_c1_g1;TRINITY_DN113130_c1_g2;TRINITY_DN114577_c1_g1;TRINITY_DN116567_c0_g2;TRINITY_DN118725_c2_g1;TRINITY_DN119936_c1_g1;TRINITY_DN122377_c1_g1;TRINITY_DN92633_c1_g1;TRINITY_DN94352_c0_g1;TRINITY_DN98171_c1_g3	14	3857	79	25617	0.297115
GO:0031146	SCF-dependent proteasomal ubiquitin-dependent protein catabolic process	biological_process	12	TRINITY_DN105252_c1_g1;TRINITY_DN105603_c0_g3;TRINITY_DN111475_c0_g2;TRINITY_DN111770_c0_g1;TRINITY_DN113877_c0_g1;TRINITY_DN117845_c2_g1;TRINITY_DN118429_c2_g1;TRINITY_DN119970_c1_g3;TRINITY_DN122118_c2_g2;TRINITY_DN122456_c3_g1;TRINITY_DN92213_c0_g1;TRINITY_DN92636_c0_g1;TRINITY_DN99536_c0_g1	13	3857	73	25617	0.300527
GO:0015369	calcium:proton antiporter activity	molecular_function	12	TRINITY_DN102198_c1_g2;TRINITY_DN108060_c0_g2;TRINITY_DN95552_c2_g1	3	3857	13	25617	0.310166
GO:0033201	alpha-1,4-glucan synthase activity	molecular_function	7	TRINITY_DN101483_c0_g1;TRINITY_DN101483_c1_g2;TRINITY_DN122035_c0_g1	3	3857	13	25617	0.310166
GO:1900056	negative regulation of leaf senescence	biological_process	10	TRINITY_DN107240_c0_g1;TRINITY_DN118064_c0_g1;TRINITY_DN98343_c0_g2	3	3857	13	25617	0.310166
GO:0009051	pentose-phosphate shunt, oxidative branch	biological_process	7	TRINITY_DN109809_c0_g1;TRINITY_DN110921_c0_g1;TRINITY_DN114912_c0_g2	3	3857	13	25617	0.310166
GO:0030130	clathrin coat of trans-Golgi network vesicle	cellular_component	9	TRINITY_DN112242_c0_g2;TRINITY_DN120337_c1_g2;TRINITY_DN99378_c0_g4	3	3857	13	25617	0.310166
GO:0032981	mitochondrial respiratory chain complex I assembly	biological_process	9	TRINITY_DN92470_c1_g1;TRINITY_DN95300_c0_g1;TRINITY_DN99282_c1_g2	3	3857	13	25617	0.310166
GO:0009099	valine biosynthetic process	biological_process	11	TRINITY_DN117426_c3_g1;TRINITY_DN118737_c0_g1;TRINITY_DN122099_c3_g2	3	3857	13	25617	0.310166
GO:0048571	long-day photoperiodism	biological_process	8	TRINITY_DN112027_c0_g1;TRINITY_DN119959_c1_g1;TRINITY_DN122399_c0_g2	3	3857	13	25617	0.310166
GO:0015368	calcium:cation antiporter activity	molecular_function	10	TRINITY_DN102198_c1_g2;TRINITY_DN108060_c0_g2;TRINITY_DN95552_c2_g1	3	3857	13	25617	0.310166
GO:0009435	NAD biosynthetic process	biological_process	10	TRINITY_DN118566_c1_g2;TRINITY_DN122462_c2_g1;TRINITY_DN98120_c0_g2	3	3857	13	25617	0.310166
GO:0046524	sucrose-phosphate synthase activity	molecular_function	8	TRINITY_DN102610_c2_g3;TRINITY_DN106881_c1_g1;TRINITY_DN118675_c0_g2	3	3857	13	25617	0.310166
GO:1901529	positive regulation of anion channel activity	biological_process	9	TRINITY_DN114159_c1_g1;TRINITY_DN114159_c1_g2;TRINITY_DN122914_c1_g4	3	3857	13	25617	0.310166
GO:0048437	floral organ development	biological_process	5	TRINITY_DN102495_c0_g2;TRINITY_DN110904_c0_g2;TRINITY_DN124846_c5_g6	3	3857	13	25617	0.310166
GO:0008360	regulation of cell shape	biological_process	8	TRINITY_DN100972_c0_g1;TRINITY_DN105325_c2_g3;TRINITY_DN107787_c2_g2;TRINITY_DN116541_c0_g1;TRINITY_DN120140_c0_g4;TRINITY_DN120573_c1_g1;TRINITY_DN120573_c2_g1;TRINITY_DN122105_c2_g1;TRINITY_DN124075_c3_g2;TRINITY_DN97374_c0_g4	10	3857	55	25617	0.31056
GO:0009637	response to blue light	biological_process	7	TRINITY_DN102292_c2_g2;TRINITY_DN112408_c2_g3;TRINITY_DN114159_c1_g1;TRINITY_DN114159_c1_g2;TRINITY_DN121114_c0_g1;TRINITY_DN122362_c0_g1;TRINITY_DN122914_c1_g4;TRINITY_DN124416_c4_g4;TRINITY_DN124900_c2_g1	9	3857	49	25617	0.313675
GO:0031966	mitochondrial membrane	cellular_component	5	TRINITY_DN100155_c0_g1;TRINITY_DN103620_c0_g1;TRINITY_DN108767_c0_g2;TRINITY_DN115639_c0_g1;TRINITY_DN119920_c0_g1;TRINITY_DN122003_c4_g5;TRINITY_DN124771_c11_g1;TRINITY_DN99157_c0_g1	8	3857	43	25617	0.316522
GO:0006491	N-glycan processing	biological_process	8	TRINITY_DN111659_c0_g1;TRINITY_DN120347_c0_g2;TRINITY_DN120412_c0_g2;TRINITY_DN120919_c0_g1	4	3857	19	25617	0.318405
GO:0033962	cytoplasmic mRNA processing body assembly	biological_process	9	TRINITY_DN104030_c2_g2;TRINITY_DN109858_c0_g1;TRINITY_DN115576_c0_g1;TRINITY_DN99001_c0_g1	4	3857	19	25617	0.318405
GO:0010192	mucilage biosynthetic process	biological_process	6	TRINITY_DN113163_c3_g2;TRINITY_DN114631_c1_g1;TRINITY_DN90102_c0_g1;TRINITY_DN96095_c1_g3	4	3857	19	25617	0.318405
GO:0051302	regulation of cell division	biological_process	6	TRINITY_DN103695_c1_g3;TRINITY_DN104805_c0_g5;TRINITY_DN109538_c0_g1;TRINITY_DN114287_c0_g1	4	3857	19	25617	0.318405
GO:0008865	fructokinase activity	molecular_function	8	TRINITY_DN111934_c4_g2;TRINITY_DN116562_c1_g1;TRINITY_DN121701_c1_g2;TRINITY_DN122684_c1_g1	4	3857	19	25617	0.318405
GO:0009225	nucleotide-sugar metabolic process	biological_process	8	TRINITY_DN105650_c0_g1;TRINITY_DN112894_c1_g1;TRINITY_DN118937_c1_g1;TRINITY_DN119087_c0_g1;TRINITY_DN119428_c1_g2;TRINITY_DN124424_c8_g2;TRINITY_DN96486_c0_g2	7	3857	37	25617	0.318918
GO:0031348	negative regulation of defense response	biological_process	8	TRINITY_DN108414_c0_g1;TRINITY_DN117130_c0_g1;TRINITY_DN117605_c1_g1;TRINITY_DN118701_c3_g1;TRINITY_DN119080_c4_g1;TRINITY_DN119970_c1_g3;TRINITY_DN123937_c2_g1	7	3857	37	25617	0.318918
GO:0006412	translation	biological_process	8	TRINITY_DN100349_c0_g1;TRINITY_DN100436_c0_g3;TRINITY_DN100597_c2_g2;TRINITY_DN101329_c2_g1;TRINITY_DN101851_c0_g2;TRINITY_DN102381_c0_g2;TRINITY_DN102517_c0_g1;TRINITY_DN103181_c0_g3;TRINITY_DN104091_c0_g1;TRINITY_DN106637_c0_g1;TRINITY_DN106777_c0_g6;TRINITY_DN106799_c0_g1;TRINITY_DN106856_c0_g5;TRINITY_DN107744_c2_g1;TRINITY_DN108272_c6_g1;TRINITY_DN108757_c1_g1;TRINITY_DN109819_c1_g2;TRINITY_…	78	3857	491	25617	0.320426
GO:0003712	transcription cofactor activity	molecular_function	4	TRINITY_DN112647_c1_g2;TRINITY_DN120570_c2_g1;TRINITY_DN121509_c0_g1;TRINITY_DN124885_c5_g2;TRINITY_DN98399_c6_g1	5	3857	25	25617	0.320796
GO:0015450	P-P-bond-hydrolysis-driven protein transmembrane transporter activity	molecular_function	7	TRINITY_DN105545_c0_g1;TRINITY_DN118718_c1_g1;TRINITY_DN123554_c3_g1;TRINITY_DN123554_c3_g4;TRINITY_DN94073_c0_g1	5	3857	25	25617	0.320796
GO:0006812	cation transport	biological_process	7	TRINITY_DN105961_c1_g1;TRINITY_DN108060_c0_g2;TRINITY_DN120761_c0_g2;TRINITY_DN123613_c3_g1;TRINITY_DN95552_c2_g1	5	3857	25	25617	0.320796
GO:0016308	1-phosphatidylinositol-4-phosphate 5-kinase activity	molecular_function	8	TRINITY_DN100807_c0_g1;TRINITY_DN104005_c3_g1;TRINITY_DN119287_c0_g2;TRINITY_DN119411_c0_g2;TRINITY_DN125057_c2_g2	5	3857	25	25617	0.320796
GO:0015095	magnesium ion transmembrane transporter activity	molecular_function	9	TRINITY_DN103758_c0_g1;TRINITY_DN117000_c1_g5;TRINITY_DN118609_c0_g1;TRINITY_DN121628_c1_g4;TRINITY_DN96682_c0_g1	5	3857	25	25617	0.320796
GO:0045116	protein neddylation	biological_process	11	TRINITY_DN101581_c1_g1;TRINITY_DN104134_c0_g1;TRINITY_DN112622_c0_g1;TRINITY_DN114441_c2_g4;TRINITY_DN118789_c6_g1	5	3857	25	25617	0.320796
GO:0004713	protein tyrosine kinase activity	molecular_function	8	TRINITY_DN102673_c0_g3;TRINITY_DN103587_c0_g1;TRINITY_DN105414_c0_g1;TRINITY_DN115089_c0_g2;TRINITY_DN98911_c1_g1	5	3857	25	25617	0.320796
GO:0008250	oligosaccharyltransferase complex	cellular_component	7	TRINITY_DN107409_c0_g1;TRINITY_DN117987_c2_g4;TRINITY_DN118729_c0_g2;TRINITY_DN123516_c5_g2;TRINITY_DN123745_c2_g1	5	3857	25	25617	0.320796
GO:0004722	protein serine/threonine phosphatase activity	molecular_function	9	TRINITY_DN100296_c0_g1;TRINITY_DN100908_c0_g1;TRINITY_DN100954_c1_g1;TRINITY_DN104041_c0_g2;TRINITY_DN106424_c0_g1;TRINITY_DN111820_c0_g1;TRINITY_DN111886_c1_g3;TRINITY_DN111935_c0_g3;TRINITY_DN112860_c0_g1;TRINITY_DN114570_c0_g1;TRINITY_DN115678_c0_g3;TRINITY_DN115787_c1_g1;TRINITY_DN116260_c2_g1;TRINITY_DN117565_c0_g2;TRINITY_DN117565_c0_g4;TRINITY_DN118011_c0_g1;TRINITY_DN119536_c1_g1;TRINITY_…	33	3857	201	25617	0.322416
GO:0007017	microtubule-based process	biological_process	4	TRINITY_DN102970_c1_g2;TRINITY_DN105959_c2_g6;TRINITY_DN109753_c1_g2;TRINITY_DN112579_c0_g2;TRINITY_DN115652_c0_g1;TRINITY_DN117455_c5_g6;TRINITY_DN119026_c1_g1;TRINITY_DN120777_c7_g3;TRINITY_DN122036_c3_g3;TRINITY_DN122753_c2_g1;TRINITY_DN124900_c2_g1;TRINITY_DN88823_c1_g1	12	3857	68	25617	0.322694
GO:0008237	metallopeptidase activity	molecular_function	7	TRINITY_DN102888_c0_g4;TRINITY_DN112080_c1_g1;TRINITY_DN114047_c0_g1;TRINITY_DN118089_c0_g1;TRINITY_DN119830_c0_g1;TRINITY_DN120664_c1_g1;TRINITY_DN121519_c0_g2;TRINITY_DN122205_c0_g1;TRINITY_DN124743_c1_g1;TRINITY_DN125140_c4_g3;TRINITY_DN92114_c0_g1;TRINITY_DN99707_c0_g3	12	3857	68	25617	0.322694
GO:0048364	root development	biological_process	6	TRINITY_DN100401_c0_g1;TRINITY_DN100564_c0_g2;TRINITY_DN112196_c0_g1;TRINITY_DN112953_c1_g2;TRINITY_DN114287_c0_g1;TRINITY_DN116230_c0_g1;TRINITY_DN116567_c0_g2;TRINITY_DN116788_c3_g1;TRINITY_DN119406_c1_g1;TRINITY_DN119936_c1_g1;TRINITY_DN119970_c1_g3;TRINITY_DN120458_c1_g1;TRINITY_DN121961_c0_g1;TRINITY_DN122062_c1_g1;TRINITY_DN122769_c1_g1;TRINITY_DN123132_c1_g1;TRINITY_DN123893_c4_g1;TRINITY_…	24	3857	144	25617	0.327494
GO:0006458	'de novo' protein folding	biological_process	5	TRINITY_DN100807_c0_g1;TRINITY_DN104005_c3_g1;TRINITY_DN105076_c1_g2;TRINITY_DN107567_c2_g1;TRINITY_DN109626_c0_g3;TRINITY_DN113696_c0_g3;TRINITY_DN114900_c0_g4;TRINITY_DN125043_c6_g2;TRINITY_DN125057_c2_g2	9	3857	50	25617	0.335978
GO:0006891	intra-Golgi vesicle-mediated transport	biological_process	8	TRINITY_DN101397_c0_g2;TRINITY_DN102116_c1_g1;TRINITY_DN106645_c1_g1;TRINITY_DN110261_c1_g5;TRINITY_DN111574_c1_g2;TRINITY_DN114609_c0_g1;TRINITY_DN114771_c2_g1;TRINITY_DN118862_c1_g3;TRINITY_DN121900_c1_g2;TRINITY_DN122863_c1_g1;TRINITY_DN89001_c0_g1;TRINITY_DN93735_c4_g6;TRINITY_DN94401_c1_g2	13	3857	75	25617	0.336532
GO:0004518	nuclease activity	molecular_function	6	TRINITY_DN104413_c0_g2;TRINITY_DN104795_c0_g1;TRINITY_DN114389_c0_g1;TRINITY_DN116437_c0_g1;TRINITY_DN117086_c1_g1;TRINITY_DN92724_c0_g3;TRINITY_DN94178_c0_g2;TRINITY_DN98915_c0_g1	8	3857	44	25617	0.340453
GO:0003713	transcription coactivator activity	molecular_function	5	TRINITY_DN101108_c0_g1;TRINITY_DN103491_c0_g3;TRINITY_DN112428_c2_g1;TRINITY_DN113070_c1_g3;TRINITY_DN117654_c0_g1;TRINITY_DN118935_c0_g1;TRINITY_DN122036_c3_g2;TRINITY_DN123249_c1_g1	8	3857	44	25617	0.340453
GO:0030170	pyridoxal phosphate binding	molecular_function	6	TRINITY_DN100711_c2_g1;TRINITY_DN104316_c1_g3;TRINITY_DN107896_c0_g1;TRINITY_DN108297_c1_g2;TRINITY_DN108561_c0_g2;TRINITY_DN111277_c0_g2;TRINITY_DN111745_c0_g2;TRINITY_DN113711_c2_g1;TRINITY_DN113711_c2_g2;TRINITY_DN115195_c2_g3;TRINITY_DN115296_c1_g1;TRINITY_DN116316_c0_g1;TRINITY_DN116316_c1_g6;TRINITY_DN118508_c0_g1;TRINITY_DN119445_c0_g1;TRINITY_DN119713_c0_g1;TRINITY_DN122075_c1_g1;TRINITY_…	24	3857	145	25617	0.340519
GO:0005351	carbohydrate:proton symporter activity	molecular_function	7	TRINITY_DN101674_c2_g1;TRINITY_DN106073_c0_g1;TRINITY_DN109010_c0_g1;TRINITY_DN109975_c0_g1;TRINITY_DN113903_c1_g1;TRINITY_DN117707_c0_g2;TRINITY_DN119291_c0_g1;TRINITY_DN120074_c1_g2;TRINITY_DN123232_c3_g2;TRINITY_DN123917_c4_g2;TRINITY_DN86480_c0_g1;TRINITY_DN93401_c0_g1	12	3857	69	25617	0.341711
GO:0042542	response to hydrogen peroxide	biological_process	7	TRINITY_DN101767_c1_g1;TRINITY_DN118311_c0_g1;TRINITY_DN118994_c1_g3;TRINITY_DN119830_c0_g1;TRINITY_DN120688_c0_g1;TRINITY_DN121393_c4_g1;TRINITY_DN121509_c0_g1;TRINITY_DN124346_c3_g5;TRINITY_DN124416_c4_g4;TRINITY_DN125095_c1_g2;TRINITY_DN125095_c1_g3;TRINITY_DN125095_c1_g4;TRINITY_DN93161_c3_g1;TRINITY_DN97664_c1_g2;TRINITY_DN98399_c6_g1	15	3857	88	25617	0.343546
GO:0030154	cell differentiation	biological_process	5	TRINITY_DN100608_c0_g1;TRINITY_DN103276_c0_g1;TRINITY_DN104437_c4_g1;TRINITY_DN105170_c2_g3;TRINITY_DN106991_c0_g3;TRINITY_DN107703_c4_g2;TRINITY_DN109327_c0_g1;TRINITY_DN109489_c2_g3;TRINITY_DN110349_c1_g5;TRINITY_DN110654_c1_g2;TRINITY_DN111589_c0_g1;TRINITY_DN112104_c0_g4;TRINITY_DN112423_c0_g2;TRINITY_DN114542_c0_g1;TRINITY_DN115032_c1_g2;TRINITY_DN115469_c2_g1;TRINITY_DN115644_c0_g1;TRINITY_…	42	3857	261	25617	0.344571
GO:0048586	regulation of long-day photoperiodism, flowering	biological_process	9	TRINITY_DN102456_c1_g1;TRINITY_DN122736_c1_g1	2	3857	8	25617	0.344607
GO:0043966	histone H3 acetylation	biological_process	11	TRINITY_DN115997_c1_g1;TRINITY_DN122999_c0_g2	2	3857	8	25617	0.344607
GO:0043066	negative regulation of apoptotic process	biological_process	9	TRINITY_DN120020_c2_g1;TRINITY_DN123316_c2_g1	2	3857	8	25617	0.344607
GO:0034450	ubiquitin-ubiquitin ligase activity	molecular_function	8	TRINITY_DN112893_c1_g1;TRINITY_DN96361_c0_g1	2	3857	8	25617	0.344607
GO:0010016	shoot system morphogenesis	biological_process	5	TRINITY_DN110138_c0_g1;TRINITY_DN99684_c0_g1	2	3857	8	25617	0.344607
GO:0006580	ethanolamine metabolic process	biological_process	7	TRINITY_DN123908_c4_g1;TRINITY_DN98178_c1_g4	2	3857	8	25617	0.344607
GO:0007004	telomere maintenance via telomerase	biological_process	10	TRINITY_DN102531_c0_g1;TRINITY_DN94521_c1_g1	2	3857	8	25617	0.344607
GO:0043044	ATP-dependent chromatin remodeling	biological_process	7	TRINITY_DN113965_c0_g1;TRINITY_DN124388_c5_g2	2	3857	8	25617	0.344607
GO:0015691	cadmium ion transport	biological_process	10	TRINITY_DN102198_c1_g2;TRINITY_DN117605_c1_g1	2	3857	8	25617	0.344607
GO:0015914	phospholipid transport	biological_process	8	TRINITY_DN109521_c0_g3;TRINITY_DN109965_c0_g5	2	3857	8	25617	0.344607
GO:0034975	protein folding in endoplasmic reticulum	biological_process	5	TRINITY_DN122125_c1_g1;TRINITY_DN122125_c1_g2	2	3857	8	25617	0.344607
GO:0006177	GMP biosynthetic process	biological_process	12	TRINITY_DN113018_c1_g1;TRINITY_DN113137_c0_g1	2	3857	8	25617	0.344607
GO:0005102	receptor binding	molecular_function	5	TRINITY_DN122862_c0_g1;TRINITY_DN99193_c0_g1	2	3857	8	25617	0.344607
GO:0045860	positive regulation of protein kinase activity	biological_process	11	TRINITY_DN110604_c0_g4;TRINITY_DN93324_c3_g1	2	3857	8	25617	0.344607
GO:0009538	photosystem I reaction center	cellular_component	6	TRINITY_DN100429_c1_g2;TRINITY_DN109118_c0_g1	2	3857	8	25617	0.344607
GO:0045962	positive regulation of development, heterochronic	biological_process	7	TRINITY_DN109489_c2_g3;TRINITY_DN110349_c1_g5	2	3857	8	25617	0.344607
GO:0004445	inositol-polyphosphate 5-phosphatase activity	molecular_function	10	TRINITY_DN92964_c0_g2;TRINITY_DN99505_c5_g2	2	3857	8	25617	0.344607
GO:0006164	purine nucleotide biosynthetic process	biological_process	10	TRINITY_DN113626_c0_g1;TRINITY_DN121855_c1_g1	2	3857	8	25617	0.344607
GO:0051443	positive regulation of ubiquitin-protein transferase activity	biological_process	12	TRINITY_DN104134_c0_g1;TRINITY_DN118789_c6_g1	2	3857	8	25617	0.344607
GO:0032266	phosphatidylinositol-3-phosphate binding	molecular_function	8	TRINITY_DN113643_c0_g1;TRINITY_DN118302_c1_g1	2	3857	8	25617	0.344607
GO:0043068	positive regulation of programmed cell death	biological_process	8	TRINITY_DN103540_c0_g1;TRINITY_DN105818_c1_g1	2	3857	8	25617	0.344607
GO:0009808	lignin metabolic process	biological_process	7	TRINITY_DN115534_c1_g1;TRINITY_DN115534_c1_g3	2	3857	8	25617	0.344607
GO:0001664	G-protein coupled receptor binding	molecular_function	6	TRINITY_DN116567_c0_g2;TRINITY_DN98171_c1_g3	2	3857	8	25617	0.344607
GO:2000031	regulation of salicylic acid mediated signaling pathway	biological_process	8	TRINITY_DN108414_c0_g1;TRINITY_DN119311_c1_g2	2	3857	8	25617	0.344607
GO:0032182	ubiquitin-like protein binding	molecular_function	5	TRINITY_DN104134_c0_g1;TRINITY_DN118789_c6_g1	2	3857	8	25617	0.344607
GO:0000479	endonucleolytic cleavage of tricistronic rRNA transcript (SSU-rRNA, 5.8S rRNA, LSU-rRNA)	biological_process	12	TRINITY_DN121102_c1_g1;TRINITY_DN121102_c1_g2	2	3857	8	25617	0.344607
GO:0048232	male gamete generation	biological_process	6	TRINITY_DN101005_c0_g3;TRINITY_DN111099_c0_g2	2	3857	8	25617	0.344607
GO:0004312	fatty acid synthase activity	molecular_function	7	TRINITY_DN121580_c1_g2;TRINITY_DN79770_c0_g1	2	3857	8	25617	0.344607
GO:0017091	AU-rich element binding	molecular_function	7	TRINITY_DN105201_c3_g2;TRINITY_DN118876_c1_g1	2	3857	8	25617	0.344607
GO:0003857	3-hydroxyacyl-CoA dehydrogenase activity	molecular_function	7	TRINITY_DN104476_c1_g1;TRINITY_DN109086_c1_g1	2	3857	8	25617	0.344607
GO:0000123	histone acetyltransferase complex	cellular_component	6	TRINITY_DN120568_c0_g1;TRINITY_DN97579_c1_g1	2	3857	8	25617	0.344607
GO:0072686	mitotic spindle	cellular_component	7	TRINITY_DN94340_c4_g2;TRINITY_DN97481_c3_g5	2	3857	8	25617	0.344607
GO:0001510	RNA methylation	biological_process	10	TRINITY_DN102676_c0_g1;TRINITY_DN109240_c2_g2	2	3857	8	25617	0.344607
GO:0048193	Golgi vesicle transport	biological_process	7	TRINITY_DN102543_c0_g2;TRINITY_DN112347_c1_g2	2	3857	8	25617	0.344607
GO:0008652	cellular amino acid biosynthetic process	biological_process	9	TRINITY_DN108034_c0_g1;TRINITY_DN108106_c0_g3	2	3857	8	25617	0.344607
GO:0000741	karyogamy	biological_process	7	TRINITY_DN107094_c1_g1;TRINITY_DN121115_c1_g1	2	3857	8	25617	0.344607
GO:0006415	translational termination	biological_process	8	TRINITY_DN100844_c0_g1;TRINITY_DN121135_c1_g2	2	3857	8	25617	0.344607
GO:0010051	xylem and phloem pattern formation	biological_process	6	TRINITY_DN106732_c0_g1;TRINITY_DN109584_c2_g1;TRINITY_DN109584_c2_g2;TRINITY_DN116772_c1_g3;TRINITY_DN119190_c3_g1;TRINITY_DN121928_c0_g1;TRINITY_DN122682_c1_g2	7	3857	38	25617	0.344845
GO:0003682	chromatin binding	molecular_function	4	TRINITY_DN101060_c0_g2;TRINITY_DN104767_c0_g1;TRINITY_DN106991_c0_g3;TRINITY_DN107597_c2_g1;TRINITY_DN110501_c5_g1;TRINITY_DN110535_c3_g4;TRINITY_DN111319_c2_g2;TRINITY_DN112104_c0_g4;TRINITY_DN112824_c0_g1;TRINITY_DN113042_c3_g1;TRINITY_DN113070_c1_g3;TRINITY_DN113965_c0_g1;TRINITY_DN117446_c0_g1;TRINITY_DN119052_c0_g1;TRINITY_DN119391_c1_g3;TRINITY_DN120569_c0_g2;TRINITY_DN120868_c2_g1;TRINITY_…	23	3857	139	25617	0.345639
GO:0001666	response to hypoxia	biological_process	5	TRINITY_DN102442_c1_g1;TRINITY_DN103833_c7_g1;TRINITY_DN104949_c0_g3;TRINITY_DN106212_c0_g1;TRINITY_DN106677_c1_g1;TRINITY_DN108414_c0_g1;TRINITY_DN111421_c1_g1;TRINITY_DN113711_c2_g2;TRINITY_DN120570_c2_g1;TRINITY_DN121291_c1_g1;TRINITY_DN98654_c2_g1	11	3857	63	25617	0.347092
GO:0031201	SNARE complex	cellular_component	6	TRINITY_DN102116_c1_g1;TRINITY_DN103930_c0_g2;TRINITY_DN105944_c0_g1;TRINITY_DN106707_c1_g1;TRINITY_DN106726_c0_g2;TRINITY_DN107828_c0_g1;TRINITY_DN107828_c1_g2;TRINITY_DN113807_c0_g2;TRINITY_DN113807_c0_g3;TRINITY_DN113936_c1_g1;TRINITY_DN91598_c1_g5	11	3857	63	25617	0.347092
GO:0006284	base-excision repair	biological_process	9	TRINITY_DN112564_c2_g2;TRINITY_DN113173_c0_g3;TRINITY_DN124518_c1_g1;TRINITY_DN124518_c2_g1;TRINITY_DN92978_c0_g7;TRINITY_DN93491_c0_g4	6	3857	32	25617	0.349
GO:0030136	clathrin-coated vesicle	cellular_component	8	TRINITY_DN107248_c0_g2;TRINITY_DN111564_c0_g1;TRINITY_DN113975_c0_g5;TRINITY_DN116124_c2_g2;TRINITY_DN124706_c1_g2;TRINITY_DN88213_c0_g1	6	3857	32	25617	0.349
GO:0000245	spliceosomal complex assembly	biological_process	9	TRINITY_DN105847_c0_g1;TRINITY_DN119294_c3_g2;TRINITY_DN124299_c2_g2;TRINITY_DN88458_c0_g3;TRINITY_DN96421_c0_g1;TRINITY_DN99001_c0_g1	6	3857	32	25617	0.349
GO:0006002	fructose 6-phosphate metabolic process	biological_process	7	TRINITY_DN104471_c0_g1;TRINITY_DN111495_c2_g3;TRINITY_DN112628_c2_g2;TRINITY_DN92834_c0_g3;TRINITY_DN97581_c2_g1;TRINITY_DN99524_c0_g3	6	3857	32	25617	0.349
GO:0048831	regulation of shoot system development	biological_process	7	TRINITY_DN103276_c0_g1;TRINITY_DN109582_c2_g1;TRINITY_DN111698_c0_g2;TRINITY_DN119550_c0_g1;TRINITY_DN121928_c0_g1	5	3857	26	25617	0.352612
GO:0032508	DNA duplex unwinding	biological_process	9	TRINITY_DN101261_c2_g1;TRINITY_DN102531_c0_g1;TRINITY_DN104655_c1_g1;TRINITY_DN110978_c2_g2;TRINITY_DN99861_c0_g1	5	3857	26	25617	0.352612
GO:0005737	cytoplasm	cellular_component	5	TRINITY_DN100076_c0_g1;TRINITY_DN100401_c0_g1;TRINITY_DN100531_c0_g3;TRINITY_DN100579_c2_g1;TRINITY_DN100711_c2_g1;TRINITY_DN100727_c0_g3;TRINITY_DN100807_c0_g1;TRINITY_DN100844_c0_g1;TRINITY_DN100954_c1_g1;TRINITY_DN100972_c0_g1;TRINITY_DN101005_c0_g3;TRINITY_DN101031_c0_g1;TRINITY_DN101193_c3_g1;TRINITY_DN101222_c0_g1;TRINITY_DN101261_c2_g1;TRINITY_DN101362_c0_g1;TRINITY_DN101564_c1_g5;TRINITY_…	670	3857	4393	25617	0.353023
GO:0019752	carboxylic acid metabolic process	biological_process	7	TRINITY_DN123908_c4_g1;TRINITY_DN91588_c1_g3;TRINITY_DN98178_c1_g4	3	3857	14	25617	0.354405
GO:0009861	jasmonic acid and ethylene-dependent systemic resistance	biological_process	6	TRINITY_DN114045_c0_g3;TRINITY_DN119970_c1_g3;TRINITY_DN121538_c0_g1	3	3857	14	25617	0.354405
GO:0043255	regulation of carbohydrate biosynthetic process	biological_process	8	TRINITY_DN103589_c1_g3;TRINITY_DN118188_c0_g1;TRINITY_DN97985_c0_g1	3	3857	14	25617	0.354405
GO:0060918	auxin transport	biological_process	7	TRINITY_DN114159_c1_g1;TRINITY_DN114159_c1_g2;TRINITY_DN122914_c1_g4	3	3857	14	25617	0.354405
GO:0016620	oxidoreductase activity, acting on the aldehyde or oxo group of donors, NAD or NADP as acceptor	molecular_function	6	TRINITY_DN110542_c2_g3;TRINITY_DN124132_c2_g2;TRINITY_DN98759_c5_g2	3	3857	14	25617	0.354405
GO:0007094	mitotic spindle assembly checkpoint	biological_process	13	TRINITY_DN114435_c1_g2;TRINITY_DN124161_c4_g1;TRINITY_DN97481_c3_g5	3	3857	14	25617	0.354405
GO:0005775	vacuolar lumen	cellular_component	7	TRINITY_DN113762_c0_g2;TRINITY_DN119654_c1_g1;TRINITY_DN123853_c6_g2	3	3857	14	25617	0.354405
GO:0030308	negative regulation of cell growth	biological_process	7	TRINITY_DN119406_c1_g1;TRINITY_DN122769_c1_g1;TRINITY_DN123132_c1_g1	3	3857	14	25617	0.354405
GO:0071949	FAD binding	molecular_function	7	TRINITY_DN114159_c1_g1;TRINITY_DN114159_c1_g2;TRINITY_DN122914_c1_g4	3	3857	14	25617	0.354405
GO:0004040	amidase activity	molecular_function	7	TRINITY_DN112957_c1_g1;TRINITY_DN118455_c0_g1;TRINITY_DN95698_c1_g2	3	3857	14	25617	0.354405
GO:0005506	iron ion binding	molecular_function	8	TRINITY_DN105756_c0_g2;TRINITY_DN108813_c0_g2;TRINITY_DN108813_c1_g1;TRINITY_DN111509_c2_g1;TRINITY_DN111757_c2_g1;TRINITY_DN112286_c1_g2;TRINITY_DN113375_c1_g2;TRINITY_DN115888_c1_g1;TRINITY_DN116391_c0_g1;TRINITY_DN116740_c1_g4;TRINITY_DN117686_c1_g1;TRINITY_DN119819_c0_g1;TRINITY_DN121135_c1_g2;TRINITY_DN88931_c0_g1;TRINITY_DN98325_c2_g5;TRINITY_DN99023_c1_g2	16	3857	95	25617	0.354599
GO:0048527	lateral root development	biological_process	8	TRINITY_DN116733_c0_g1;TRINITY_DN121827_c3_g1;TRINITY_DN123071_c2_g1;TRINITY_DN97445_c1_g1	4	3857	20	25617	0.355002
GO:0010207	photosystem II assembly	biological_process	8	TRINITY_DN104970_c0_g1;TRINITY_DN108858_c0_g1;TRINITY_DN111847_c1_g5;TRINITY_DN99724_c0_g5	4	3857	20	25617	0.355002
GO:0019904	protein domain specific binding	molecular_function	5	TRINITY_DN102402_c0_g1;TRINITY_DN109762_c1_g2;TRINITY_DN94500_c2_g1;TRINITY_DN95988_c0_g3	4	3857	20	25617	0.355002
GO:0031461	cullin-RING ubiquitin ligase complex	cellular_component	6	TRINITY_DN110038_c0_g1;TRINITY_DN112769_c0_g1;TRINITY_DN115650_c3_g2;TRINITY_DN123165_c1_g3	4	3857	20	25617	0.355002
GO:0006896	Golgi to vacuole transport	biological_process	9	TRINITY_DN101117_c1_g1;TRINITY_DN113975_c0_g5;TRINITY_DN124706_c1_g2;TRINITY_DN88213_c0_g1	4	3857	20	25617	0.355002
GO:0007034	vacuolar transport	biological_process	6	TRINITY_DN101117_c1_g1;TRINITY_DN105542_c1_g1;TRINITY_DN110155_c1_g1;TRINITY_DN114448_c1_g3	4	3857	20	25617	0.355002
GO:0009742	brassinosteroid mediated signaling pathway	biological_process	7	TRINITY_DN102411_c1_g1;TRINITY_DN105494_c6_g5;TRINITY_DN108985_c0_g3;TRINITY_DN109580_c1_g1;TRINITY_DN111936_c0_g1;TRINITY_DN116388_c0_g2;TRINITY_DN118229_c7_g1;TRINITY_DN119406_c1_g1;TRINITY_DN120724_c1_g1;TRINITY_DN120766_c1_g4;TRINITY_DN121025_c1_g1;TRINITY_DN122769_c1_g1;TRINITY_DN122933_c1_g3;TRINITY_DN123132_c1_g1;TRINITY_DN92008_c1_g2;TRINITY_DN92514_c0_g1;TRINITY_DN94500_c2_g1;TRINITY_DN9…	21	3857	127	25617	0.356449
GO:0030433	ubiquitin-dependent ERAD pathway	biological_process	8	TRINITY_DN105203_c1_g1;TRINITY_DN108109_c1_g1;TRINITY_DN112321_c0_g1;TRINITY_DN112893_c1_g1;TRINITY_DN113396_c0_g2;TRINITY_DN114150_c0_g2;TRINITY_DN114261_c2_g4;TRINITY_DN124150_c1_g1;TRINITY_DN97851_c2_g1	9	3857	51	25617	0.358532
GO:0006906	vesicle fusion	biological_process	7	TRINITY_DN102116_c1_g1;TRINITY_DN103930_c0_g2;TRINITY_DN105944_c0_g1;TRINITY_DN106707_c1_g1;TRINITY_DN106726_c0_g2;TRINITY_DN113807_c0_g2;TRINITY_DN113807_c0_g3;TRINITY_DN113936_c1_g1;TRINITY_DN91598_c1_g5	9	3857	51	25617	0.358532
GO:0000785	chromatin	cellular_component	6	TRINITY_DN101060_c0_g2;TRINITY_DN104767_c0_g1;TRINITY_DN111319_c2_g2;TRINITY_DN112226_c0_g1;TRINITY_DN117408_c0_g1;TRINITY_DN117444_c0_g1;TRINITY_DN119052_c0_g1;TRINITY_DN121805_c1_g1;TRINITY_DN122241_c2_g1;TRINITY_DN124672_c3_g1;TRINITY_DN124701_c2_g1;TRINITY_DN98078_c4_g1	12	3857	70	25617	0.36093
GO:0009908	flower development	biological_process	6	TRINITY_DN100731_c0_g1;TRINITY_DN100731_c0_g2;TRINITY_DN104476_c1_g1;TRINITY_DN104696_c0_g1;TRINITY_DN106132_c4_g2;TRINITY_DN106360_c0_g2;TRINITY_DN109086_c1_g1;TRINITY_DN109446_c0_g1;TRINITY_DN112390_c5_g1;TRINITY_DN113048_c2_g2;TRINITY_DN114278_c0_g1;TRINITY_DN117654_c0_g1;TRINITY_DN121009_c0_g1;TRINITY_DN123793_c4_g1;TRINITY_DN123893_c4_g1;TRINITY_DN124005_c3_g1;TRINITY_DN124281_c1_g1;TRINITY_…	27	3857	166	25617	0.363108
GO:0009965	leaf morphogenesis	biological_process	6	TRINITY_DN100608_c0_g1;TRINITY_DN108160_c1_g2;TRINITY_DN109465_c0_g2;TRINITY_DN109489_c2_g3;TRINITY_DN109727_c1_g1;TRINITY_DN110349_c1_g5;TRINITY_DN113708_c0_g1;TRINITY_DN121689_c0_g2;TRINITY_DN125223_c2_g2;TRINITY_DN93814_c0_g1;TRINITY_DN95543_c2_g2	11	3857	64	25617	0.367317
GO:0006974	cellular response to DNA damage stimulus	biological_process	6	TRINITY_DN115892_c0_g1;TRINITY_DN116194_c0_g1;TRINITY_DN116194_c0_g2;TRINITY_DN120570_c2_g1;TRINITY_DN122252_c2_g4;TRINITY_DN122535_c2_g2;TRINITY_DN98325_c2_g5	7	3857	39	25617	0.371
GO:0034605	cellular response to heat	biological_process	6	TRINITY_DN107900_c1_g1;TRINITY_DN117086_c1_g1;TRINITY_DN120637_c1_g1;TRINITY_DN121313_c1_g1;TRINITY_DN88770_c0_g1;TRINITY_DN94717_c2_g1;TRINITY_DN96283_c0_g1	7	3857	39	25617	0.371
GO:0016310	phosphorylation	biological_process	7	TRINITY_DN101222_c0_g1;TRINITY_DN101614_c1_g1;TRINITY_DN102624_c0_g1;TRINITY_DN103334_c1_g1;TRINITY_DN104191_c1_g2;TRINITY_DN104324_c3_g1;TRINITY_DN104418_c0_g1;TRINITY_DN105052_c0_g2;TRINITY_DN105227_c0_g1;TRINITY_DN105297_c0_g2;TRINITY_DN107293_c1_g1;TRINITY_DN108459_c0_g1;TRINITY_DN108609_c1_g4;TRINITY_DN109434_c0_g2;TRINITY_DN109646_c0_g1;TRINITY_DN109905_c0_g1;TRINITY_DN110146_c0_g4;TRINITY_…	50	3857	316	25617	0.374335
GO:0005774	vacuolar membrane	cellular_component	7	TRINITY_DN100072_c0_g1;TRINITY_DN101526_c0_g1;TRINITY_DN101727_c0_g1;TRINITY_DN102970_c1_g2;TRINITY_DN103107_c0_g1;TRINITY_DN103342_c0_g1;TRINITY_DN105076_c1_g2;TRINITY_DN105094_c1_g2;TRINITY_DN105353_c1_g4;TRINITY_DN105545_c0_g1;TRINITY_DN105625_c0_g1;TRINITY_DN105841_c1_g2;TRINITY_DN106752_c1_g1;TRINITY_DN106970_c0_g2;TRINITY_DN107360_c0_g1;TRINITY_DN107405_c1_g1;TRINITY_DN107828_c0_g1;TRINITY_…	99	3857	636	25617	0.374869
GO:0006629	lipid metabolic process	biological_process	5	TRINITY_DN102411_c1_g1;TRINITY_DN102442_c1_g1;TRINITY_DN106901_c1_g2;TRINITY_DN108414_c0_g1;TRINITY_DN111421_c1_g1;TRINITY_DN111421_c1_g2;TRINITY_DN111791_c3_g3;TRINITY_DN112238_c0_g2;TRINITY_DN112519_c2_g1;TRINITY_DN113969_c0_g1;TRINITY_DN114012_c0_g1;TRINITY_DN116175_c0_g1;TRINITY_DN118229_c7_g1;TRINITY_DN118690_c0_g1;TRINITY_DN119864_c0_g3;TRINITY_DN120151_c0_g1;TRINITY_DN120753_c1_g1;TRINITY_…	27	3857	167	25617	0.375632
GO:0006633	fatty acid biosynthetic process	biological_process	10	TRINITY_DN100463_c0_g1;TRINITY_DN101310_c1_g1;TRINITY_DN102798_c0_g3;TRINITY_DN102874_c0_g1;TRINITY_DN103442_c0_g1;TRINITY_DN107936_c1_g1;TRINITY_DN110834_c0_g3;TRINITY_DN110843_c0_g1;TRINITY_DN110843_c0_g2;TRINITY_DN110998_c0_g2;TRINITY_DN113501_c2_g1;TRINITY_DN113983_c2_g2;TRINITY_DN116175_c0_g1;TRINITY_DN119067_c1_g1;TRINITY_DN119311_c1_g2;TRINITY_DN120057_c0_g1;TRINITY_DN121580_c1_g2;TRINITY_…	20	3857	122	25617	0.376857
GO:0006520	cellular amino acid metabolic process	biological_process	8	TRINITY_DN115296_c1_g1;TRINITY_DN119411_c0_g2;TRINITY_DN123908_c4_g1;TRINITY_DN93651_c0_g1;TRINITY_DN98178_c1_g4;TRINITY_DN99469_c2_g1	6	3857	33	25617	0.37765
GO:0008219	cell death	biological_process	4	TRINITY_DN100484_c1_g4;TRINITY_DN103575_c0_g1;TRINITY_DN105201_c3_g2;TRINITY_DN109044_c0_g1;TRINITY_DN110146_c0_g4;TRINITY_DN112001_c0_g1;TRINITY_DN118876_c1_g1;TRINITY_DN119628_c1_g7;TRINITY_DN123937_c2_g1;TRINITY_DN124461_c0_g1;TRINITY_DN124841_c3_g2;TRINITY_DN90653_c0_g1	12	3857	71	25617	0.380301
GO:0070417	cellular response to cold	biological_process	6	TRINITY_DN119451_c0_g1;TRINITY_DN121313_c1_g1;TRINITY_DN88770_c0_g1;TRINITY_DN94454_c0_g1;TRINITY_DN94717_c2_g1	5	3857	27	25617	0.384552
GO:0031338	regulation of vesicle fusion	biological_process	8	TRINITY_DN113432_c0_g1;TRINITY_DN114906_c0_g2;TRINITY_DN114979_c1_g2;TRINITY_DN120372_c0_g1;TRINITY_DN121264_c2_g2	5	3857	27	25617	0.384552
GO:0019706	protein-cysteine S-palmitoyltransferase activity	molecular_function	8	TRINITY_DN107436_c0_g1;TRINITY_DN111535_c1_g2;TRINITY_DN120423_c2_g1;TRINITY_DN120610_c0_g1;TRINITY_DN120610_c1_g2	5	3857	27	25617	0.384552
GO:0031072	heat shock protein binding	molecular_function	5	TRINITY_DN105038_c0_g2;TRINITY_DN123849_c5_g2;TRINITY_DN89929_c3_g1;TRINITY_DN93327_c0_g1;TRINITY_DN97061_c0_g1	5	3857	27	25617	0.384552
GO:0098542	defense response to other organism	biological_process	6	TRINITY_DN101165_c0_g1;TRINITY_DN106089_c1_g1;TRINITY_DN106146_c0_g3;TRINITY_DN116773_c0_g1;TRINITY_DN123849_c5_g2	5	3857	27	25617	0.384552
GO:0006000	fructose metabolic process	biological_process	8	TRINITY_DN111495_c2_g3;TRINITY_DN111934_c4_g2;TRINITY_DN122684_c1_g1;TRINITY_DN97581_c2_g1;TRINITY_DN99524_c0_g3	5	3857	27	25617	0.384552
GO:0010181	FMN binding	molecular_function	7	TRINITY_DN114424_c1_g2;TRINITY_DN115549_c0_g1;TRINITY_DN118104_c2_g3;TRINITY_DN97655_c1_g1;TRINITY_DN97655_c1_g2	5	3857	27	25617	0.384552
GO:0044545	NSL complex	cellular_component	8	TRINITY_DN99646_c0_g1	1	3857	3	25617	0.38711
GO:0071044	histone mRNA catabolic process	biological_process	12	TRINITY_DN122464_c2_g1	1	3857	3	25617	0.38711
GO:0046539	histamine N-methyltransferase activity	molecular_function	8	TRINITY_DN119967_c0_g2	1	3857	3	25617	0.38711
GO:0006741	NADP biosynthetic process	biological_process	5	TRINITY_DN120041_c1_g1	1	3857	3	25617	0.38711
GO:0009513	etioplast	cellular_component	7	TRINITY_DN109465_c0_g2	1	3857	3	25617	0.38711
GO:0016630	protochlorophyllide reductase activity	molecular_function	7	TRINITY_DN124077_c2_g1	1	3857	3	25617	0.38711
GO:0019566	arabinose metabolic process	biological_process	8	TRINITY_DN121415_c0_g2	1	3857	3	25617	0.38711
GO:0102132	3-oxo-pimeloyl-[acp] methyl ester reductase activity	molecular_function	7	TRINITY_DN110834_c0_g3	1	3857	3	25617	0.38711
GO:1900871	chloroplast mRNA modification	biological_process	11	TRINITY_DN107339_c0_g1	1	3857	3	25617	0.38711
GO:0071569	protein ufmylation	biological_process	11	TRINITY_DN104511_c0_g1	1	3857	3	25617	0.38711
GO:0019203	carbohydrate phosphatase activity	molecular_function	8	TRINITY_DN91960_c1_g3	1	3857	3	25617	0.38711
GO:0048657	anther wall tapetum cell differentiation	biological_process	5	TRINITY_DN122933_c1_g3	1	3857	3	25617	0.38711
GO:0043693	monoterpene biosynthetic process	biological_process	10	TRINITY_DN101445_c1_g1	1	3857	3	25617	0.38711
GO:0046475	glycerophospholipid catabolic process	biological_process	9	TRINITY_DN117825_c0_g1	1	3857	3	25617	0.38711
GO:0004338	glucan exo-1,3-beta-glucosidase activity	molecular_function	9	TRINITY_DN98056_c1_g1	1	3857	3	25617	0.38711
GO:0032044	DSIF complex	cellular_component	5	TRINITY_DN122491_c0_g1	1	3857	3	25617	0.38711
GO:0071217	cellular response to external biotic stimulus	biological_process	6	TRINITY_DN120570_c2_g1	1	3857	3	25617	0.38711
GO:0010484	H3 histone acetyltransferase activity	molecular_function	12	TRINITY_DN97579_c1_g1	1	3857	3	25617	0.38711
GO:0031226	intrinsic component of plasma membrane	cellular_component	5	TRINITY_DN115457_c0_g1	1	3857	3	25617	0.38711
GO:0033587	shikimate biosynthetic process	biological_process	10	TRINITY_DN118225_c0_g3	1	3857	3	25617	0.38711
GO:0006073	cellular glucan metabolic process	biological_process	8	TRINITY_DN98056_c1_g1	1	3857	3	25617	0.38711
GO:2000616	negative regulation of histone H3-K9 acetylation	biological_process	12	TRINITY_DN98078_c4_g1	1	3857	3	25617	0.38711
GO:0071222	cellular response to lipopolysaccharide	biological_process	8	TRINITY_DN112578_c1_g1	1	3857	3	25617	0.38711
GO:0010265	SCF complex assembly	biological_process	7	TRINITY_DN114514_c2_g1	1	3857	3	25617	0.38711
GO:0048209	regulation of vesicle targeting, to, from or within Golgi	biological_process	7	TRINITY_DN102116_c1_g1	1	3857	3	25617	0.38711
GO:0070536	protein K63-linked deubiquitination	biological_process	10	TRINITY_DN117872_c1_g2	1	3857	3	25617	0.38711
GO:0008746	NAD(P)+ transhydrogenase activity	molecular_function	7	TRINITY_DN108163_c0_g1	1	3857	3	25617	0.38711
GO:0055070	copper ion homeostasis	biological_process	11	TRINITY_DN112786_c0_g1	1	3857	3	25617	0.38711
GO:0034720	histone H3-K4 demethylation	biological_process	13	TRINITY_DN104696_c0_g1	1	3857	3	25617	0.38711
GO:0030397	membrane disassembly	biological_process	6	TRINITY_DN100401_c0_g1	1	3857	3	25617	0.38711
GO:0060090	molecular adaptor activity	molecular_function	4	TRINITY_DN120570_c2_g1	1	3857	3	25617	0.38711
GO:0005471	ATP:ADP antiporter activity	molecular_function	10	TRINITY_DN117172_c1_g1	1	3857	3	25617	0.38711
GO:0050313	sulfur dioxygenase activity	molecular_function	7	TRINITY_DN117332_c1_g4	1	3857	3	25617	0.38711
GO:1902417	(+)-abscisic acid D-glucopyranosyl ester transmembrane transporter activity	molecular_function	7	TRINITY_DN124186_c3_g1	1	3857	3	25617	0.38711
GO:0070696	transmembrane receptor protein serine/threonine kinase binding	molecular_function	7	TRINITY_DN107017_c0_g1	1	3857	3	25617	0.38711
GO:0030775	glucuronoxylan 4-O-methyltransferase activity	molecular_function	8	TRINITY_DN99876_c0_g1	1	3857	3	25617	0.38711
GO:0006354	DNA-templated transcription, elongation	biological_process	8	TRINITY_DN96407_c0_g5	1	3857	3	25617	0.38711
GO:0009885	transmembrane histidine kinase cytokinin receptor activity	molecular_function	10	TRINITY_DN109582_c2_g1	1	3857	3	25617	0.38711
GO:0036455	iron-sulfur transferase activity	molecular_function	6	TRINITY_DN120542_c1_g4	1	3857	3	25617	0.38711
GO:0005662	DNA replication factor A complex	cellular_component	4	TRINITY_DN117287_c0_g1	1	3857	3	25617	0.38711
GO:0006895	Golgi to endosome transport	biological_process	9	TRINITY_DN117826_c0_g1	1	3857	3	25617	0.38711
GO:0046898	response to cycloheximide	biological_process	7	TRINITY_DN120570_c2_g1	1	3857	3	25617	0.38711
GO:0060964	regulation of gene silencing by miRNA	biological_process	10	TRINITY_DN115189_c2_g1	1	3857	3	25617	0.38711
GO:2000011	regulation of adaxial/abaxial pattern formation	biological_process	7	TRINITY_DN112889_c0_g1	1	3857	3	25617	0.38711
GO:0006720	isoprenoid metabolic process	biological_process	7	TRINITY_DN114032_c2_g4	1	3857	3	25617	0.38711
GO:0005977	glycogen metabolic process	biological_process	9	TRINITY_DN110847_c5_g4	1	3857	3	25617	0.38711
GO:0004647	phosphoserine phosphatase activity	molecular_function	8	TRINITY_DN97625_c1_g3	1	3857	3	25617	0.38711
GO:0046040	IMP metabolic process	biological_process	11	TRINITY_DN118897_c0_g1	1	3857	3	25617	0.38711
GO:0055035	plastid thylakoid membrane	cellular_component	6	TRINITY_DN112786_c0_g1	1	3857	3	25617	0.38711
GO:0004326	tetrahydrofolylpolyglutamate synthase activity	molecular_function	7	TRINITY_DN122062_c1_g1	1	3857	3	25617	0.38711
GO:0004594	pantothenate kinase activity	molecular_function	7	TRINITY_DN122216_c1_g1	1	3857	3	25617	0.38711
GO:0010476	gibberellin mediated signaling pathway	biological_process	6	TRINITY_DN91846_c1_g1	1	3857	3	25617	0.38711
GO:0030991	intraciliary transport particle A	cellular_component	4	TRINITY_DN112596_c0_g2	1	3857	3	25617	0.38711
GO:0047951	glutathione thiolesterase activity	molecular_function	7	TRINITY_DN117332_c1_g4	1	3857	3	25617	0.38711
GO:0045239	tricarboxylic acid cycle enzyme complex	cellular_component	4	TRINITY_DN103282_c1_g3	1	3857	3	25617	0.38711
GO:0046027	phospholipid:diacylglycerol acyltransferase activity	molecular_function	9	TRINITY_DN106901_c1_g2	1	3857	3	25617	0.38711
GO:0004019	adenylosuccinate synthase activity	molecular_function	6	TRINITY_DN118897_c0_g1	1	3857	3	25617	0.38711
GO:0032496	response to lipopolysaccharide	biological_process	7	TRINITY_DN107859_c0_g1	1	3857	3	25617	0.38711
GO:0008274	gamma-tubulin ring complex	cellular_component	6	TRINITY_DN124836_c2_g1	1	3857	3	25617	0.38711
GO:0090480	purine nucleotide-sugar transmembrane transport	biological_process	9	TRINITY_DN102301_c5_g1	1	3857	3	25617	0.38711
GO:0016151	nickel cation binding	molecular_function	8	TRINITY_DN98793_c0_g1	1	3857	3	25617	0.38711
GO:1900368	regulation of RNA interference	biological_process	10	TRINITY_DN115189_c2_g1	1	3857	3	25617	0.38711
GO:0004368	glycerol-3-phosphate dehydrogenase activity	molecular_function	7	TRINITY_DN113290_c2_g3	1	3857	3	25617	0.38711
GO:0046509	1,2-diacylglycerol 3-beta-galactosyltransferase activity	molecular_function	8	TRINITY_DN114697_c0_g1	1	3857	3	25617	0.38711
GO:0030242	autophagy of peroxisome	biological_process	7	TRINITY_DN122091_c1_g1	1	3857	3	25617	0.38711
GO:0042350	GDP-L-fucose biosynthetic process	biological_process	10	TRINITY_DN112129_c0_g3	1	3857	3	25617	0.38711
GO:0009729	detection of brassinosteroid stimulus	biological_process	7	TRINITY_DN122933_c1_g3	1	3857	3	25617	0.38711
GO:0006203	dGTP catabolic process	biological_process	12	TRINITY_DN98639_c0_g2	1	3857	3	25617	0.38711
GO:0048833	specification of floral organ number	biological_process	5	TRINITY_DN108160_c1_g2	1	3857	3	25617	0.38711
GO:0003856	3-dehydroquinate synthase activity	molecular_function	7	TRINITY_DN118225_c0_g3	1	3857	3	25617	0.38711
GO:0000375	RNA splicing, via transesterification reactions	biological_process	11	TRINITY_DN104527_c1_g1	1	3857	3	25617	0.38711
GO:0071049	nuclear retention of pre-mRNA with aberrant 3'-ends at the site of transcription	biological_process	8	TRINITY_DN103402_c1_g1	1	3857	3	25617	0.38711
GO:0070039	rRNA (guanosine-2'-O-)-methyltransferase activity	molecular_function	10	TRINITY_DN122591_c1_g1	1	3857	3	25617	0.38711
GO:0090359	negative regulation of abscisic acid biosynthetic process	biological_process	9	TRINITY_DN107017_c0_g1	1	3857	3	25617	0.38711
GO:0030643	cellular phosphate ion homeostasis	biological_process	11	TRINITY_DN117825_c0_g1	1	3857	3	25617	0.38711
GO:0033743	peptide-methionine (R)-S-oxide reductase activity	molecular_function	7	TRINITY_DN96568_c0_g1	1	3857	3	25617	0.38711
GO:0016262	protein N-acetylglucosaminyltransferase activity	molecular_function	8	TRINITY_DN121009_c0_g1	1	3857	3	25617	0.38711
GO:2001066	amylopectin binding	molecular_function	5	TRINITY_DN91960_c1_g3	1	3857	3	25617	0.38711
GO:1905615	positive regulation of developmental vegetative growth	biological_process	8	TRINITY_DN107510_c1_g2	1	3857	3	25617	0.38711
GO:0045547	dehydrodolichyl diphosphate synthase activity	molecular_function	7	TRINITY_DN102263_c4_g2	1	3857	3	25617	0.38711
GO:0005052	peroxisome matrix targeting signal-1 binding	molecular_function	8	TRINITY_DN119886_c0_g1	1	3857	3	25617	0.38711
GO:0005779	integral component of peroxisomal membrane	cellular_component	7	TRINITY_DN102759_c0_g1	1	3857	3	25617	0.38711
GO:0006212	uracil catabolic process	biological_process	11	TRINITY_DN101981_c0_g1	1	3857	3	25617	0.38711
GO:0006127	glycerophosphate shuttle	biological_process	6	TRINITY_DN113290_c2_g3	1	3857	3	25617	0.38711
GO:0010086	embryonic root morphogenesis	biological_process	7	TRINITY_DN109582_c2_g1	1	3857	3	25617	0.38711
GO:0035098	ESC/E(Z) complex	cellular_component	5	TRINITY_DN109559_c1_g1	1	3857	3	25617	0.38711
GO:0016572	histone phosphorylation	biological_process	10	TRINITY_DN94340_c4_g2	1	3857	3	25617	0.38711
GO:0031505	fungal-type cell wall organization	biological_process	7	TRINITY_DN98056_c1_g1	1	3857	3	25617	0.38711
GO:0043996	histone acetyltransferase activity (H4-K8 specific	molecular_function	13	TRINITY_DN99646_c0_g1	1	3857	3	25617	0.38711
GO:0019408	dolichol biosynthetic process	biological_process	10	TRINITY_DN102263_c4_g2	1	3857	3	25617	0.38711
GO:0010390	histone monoubiquitination	biological_process	13	TRINITY_DN113708_c0_g1	1	3857	3	25617	0.38711
GO:0016233	telomere capping	biological_process	9	TRINITY_DN102531_c0_g1	1	3857	3	25617	0.38711
GO:0031468	nuclear envelope reassembly	biological_process	7	TRINITY_DN95911_c2_g1	1	3857	3	25617	0.38711
GO:0046972	histone acetyltransferase activity (H4-K16 specific)	molecular_function	13	TRINITY_DN99646_c0_g1	1	3857	3	25617	0.38711
GO:0051446	positive regulation of meiotic cell cycle	biological_process	8	TRINITY_DN109538_c0_g1	1	3857	3	25617	0.38711
GO:0009945	radial axis specification	biological_process	6	TRINITY_DN117795_c0_g1	1	3857	3	25617	0.38711
GO:1902418	(+)-abscisic acid D-glucopyranosyl ester transmembrane transport	biological_process	10	TRINITY_DN124186_c3_g1	1	3857	3	25617	0.38711
GO:0006449	regulation of translational termination	biological_process	10	TRINITY_DN123398_c3_g1	1	3857	3	25617	0.38711
GO:0044208	'de novo' AMP biosynthetic process	biological_process	13	TRINITY_DN118897_c0_g1	1	3857	3	25617	0.38711
GO:0006656	phosphatidylcholine biosynthetic process	biological_process	10	TRINITY_DN109293_c2_g1	1	3857	3	25617	0.38711
GO:0034214	protein hexamerization	biological_process	8	TRINITY_DN122872_c1_g2	1	3857	3	25617	0.38711
GO:0045471	response to ethanol	biological_process	6	TRINITY_DN97664_c1_g2	1	3857	3	25617	0.38711
GO:0036464	cytoplasmic ribonucleoprotein granule	cellular_component	7	TRINITY_DN119563_c1_g1	1	3857	3	25617	0.38711
GO:0019346	transsulfuration	biological_process	11	TRINITY_DN115296_c1_g1	1	3857	3	25617	0.38711
GO:0000249	C-22 sterol desaturase activity	molecular_function	7	TRINITY_DN120370_c0_g1	1	3857	3	25617	0.38711
GO:0035721	intraciliary retrograde transport	biological_process	8	TRINITY_DN112596_c0_g2	1	3857	3	25617	0.38711
GO:0046166	glyceraldehyde-3-phosphate biosynthetic process	biological_process	7	TRINITY_DN108680_c0_g1	1	3857	3	25617	0.38711
GO:0004532	exoribonuclease activity	molecular_function	8	TRINITY_DN122464_c2_g1	1	3857	3	25617	0.38711
GO:0019343	cysteine biosynthetic process via cystathionine	biological_process	12	TRINITY_DN115296_c1_g1	1	3857	3	25617	0.38711
GO:0008841	dihydrofolate synthase activity	molecular_function	7	TRINITY_DN122062_c1_g1	1	3857	3	25617	0.38711
GO:0071922	regulation of cohesin loading	biological_process	10	TRINITY_DN121433_c0_g2	1	3857	3	25617	0.38711
GO:0033925	mannosyl-glycoprotein endo-beta-N-acetylglucosaminidase activity	molecular_function	7	TRINITY_DN120347_c0_g2	1	3857	3	25617	0.38711
GO:0032889	regulation of vacuole fusion, non-autophagic	biological_process	9	TRINITY_DN122745_c3_g3	1	3857	3	25617	0.38711
GO:0060623	regulation of chromosome condensation	biological_process	9	TRINITY_DN121433_c0_g2	1	3857	3	25617	0.38711
GO:0005976	polysaccharide metabolic process	biological_process	6	TRINITY_DN121198_c1_g1	1	3857	3	25617	0.38711
GO:0019483	beta-alanine biosynthetic process	biological_process	10	TRINITY_DN101981_c0_g1	1	3857	3	25617	0.38711
GO:0043995	histone acetyltransferase activity (H4-K5 specific	molecular_function	13	TRINITY_DN99646_c0_g1	1	3857	3	25617	0.38711
GO:0016624	oxidoreductase activity, acting on the aldehyde or oxo group of donors, disulfide as acceptor	molecular_function	6	TRINITY_DN117083_c0_g4	1	3857	3	25617	0.38711
GO:0071902	positive regulation of protein serine/threonine kinase activity	biological_process	12	TRINITY_DN123954_c1_g1	1	3857	3	25617	0.38711
GO:0052591	sn-glycerol-3-phosphate:ubiquinone-8 oxidoreductase activity	molecular_function	9	TRINITY_DN113290_c2_g3	1	3857	3	25617	0.38711
GO:0004576	oligosaccharyl transferase activity	molecular_function	7	TRINITY_DN123440_c2_g2	1	3857	3	25617	0.38711
GO:0000900	translation repressor activity, mRNA regulatory element binding	molecular_function	5	TRINITY_DN104437_c4_g1	1	3857	3	25617	0.38711
GO:0004751	ribose-5-phosphate isomerase activity	molecular_function	7	TRINITY_DN110421_c5_g1	1	3857	3	25617	0.38711
GO:0010006	Toc complex	cellular_component	8	TRINITY_DN105545_c0_g1	1	3857	3	25617	0.38711
GO:0010220	positive regulation of vernalization response	biological_process	8	TRINITY_DN94913_c0_g2	1	3857	3	25617	0.38711
GO:0071492	cellular response to UV-A	biological_process	9	TRINITY_DN90943_c0_g1	1	3857	3	25617	0.38711
GO:0046513	ceramide biosynthetic process	biological_process	10	TRINITY_DN117232_c0_g1	1	3857	3	25617	0.38711
GO:0004149	dihydrolipoyllysine-residue succinyltransferase activity	molecular_function	9	TRINITY_DN116427_c1_g2	1	3857	3	25617	0.38711
GO:0010106	cellular response to iron ion starvation	biological_process	9	TRINITY_DN112286_c1_g2	1	3857	3	25617	0.38711
GO:0010789	meiotic sister chromatid cohesion involved in meiosis I	biological_process	7	TRINITY_DN121433_c0_g2	1	3857	3	25617	0.38711
GO:0006275	regulation of DNA replication	biological_process	9	TRINITY_DN117932_c0_g1	1	3857	3	25617	0.38711
GO:0010331	gibberellin binding	molecular_function	6	TRINITY_DN91846_c1_g1	1	3857	3	25617	0.38711
GO:0030261	chromosome condensation	biological_process	9	TRINITY_DN100433_c0_g1	1	3857	3	25617	0.38711
GO:0017183	peptidyl-diphthamide biosynthetic process from peptidyl-histidine	biological_process	12	TRINITY_DN119799_c1_g1	1	3857	3	25617	0.38711
GO:1900111	positive regulation of histone H3-K9 dimethylation	biological_process	13	TRINITY_DN115189_c2_g1	1	3857	3	25617	0.38711
GO:0043325	phosphatidylinositol-3,4-bisphosphate binding	molecular_function	9	TRINITY_DN118302_c1_g1	1	3857	3	25617	0.38711
GO:0043462	regulation of ATPase activity	biological_process	7	TRINITY_DN105038_c0_g2	1	3857	3	25617	0.38711
GO:0044843	cell cycle G1/S phase transition	biological_process	6	TRINITY_DN103695_c1_g3	1	3857	3	25617	0.38711
GO:0004123	cystathionine gamma-lyase activity	molecular_function	6	TRINITY_DN115296_c1_g1	1	3857	3	25617	0.38711
GO:0080169	cellular response to boron-containing substance deprivation	biological_process	9	TRINITY_DN117880_c1_g1	1	3857	3	25617	0.38711
GO:0072344	rescue of stalled ribosome	biological_process	9	TRINITY_DN112196_c0_g1	1	3857	3	25617	0.38711
GO:0048283	indeterminate inflorescence morphogenesis	biological_process	6	TRINITY_DN125202_c1_g1	1	3857	3	25617	0.38711
GO:0010296	prenylcysteine methylesterase activity	molecular_function	8	TRINITY_DN105753_c0_g2	1	3857	3	25617	0.38711
GO:0050577	GDP-L-fucose synthase activity	molecular_function	7	TRINITY_DN112129_c0_g3	1	3857	3	25617	0.38711
GO:0048508	embryonic meristem development	biological_process	5	TRINITY_DN117795_c0_g1	1	3857	3	25617	0.38711
GO:0006521	regulation of cellular amino acid metabolic process	biological_process	8	TRINITY_DN93793_c0_g1	1	3857	3	25617	0.38711
GO:0051315	attachment of mitotic spindle microtubules to kinetochore	biological_process	6	TRINITY_DN97481_c3_g5	1	3857	3	25617	0.38711
GO:0019674	NAD metabolic process	biological_process	4	TRINITY_DN120041_c1_g1	1	3857	3	25617	0.38711
GO:1905182	positive regulation of urease activity	biological_process	8	TRINITY_DN98793_c0_g1	1	3857	3	25617	0.38711
GO:0010024	phytochromobilin biosynthetic process	biological_process	8	TRINITY_DN116249_c1_g1	1	3857	3	25617	0.38711
GO:0004047	aminomethyltransferase activity	molecular_function	7	TRINITY_DN108564_c1_g1	1	3857	3	25617	0.38711
GO:0004729	oxygen-dependent protoporphyrinogen oxidase activity	molecular_function	7	TRINITY_DN121043_c0_g3	1	3857	3	25617	0.38711
GO:0006883	cellular sodium ion homeostasis	biological_process	11	TRINITY_DN104339_c0_g2	1	3857	3	25617	0.38711
GO:0010272	response to silver ion	biological_process	7	TRINITY_DN120570_c2_g1	1	3857	3	25617	0.38711
GO:0033186	CAF-1 complex	cellular_component	4	TRINITY_DN122410_c1_g1	1	3857	3	25617	0.38711
GO:0008417	fucosyltransferase activity	molecular_function	7	TRINITY_DN98006_c0_g1	1	3857	3	25617	0.38711
GO:0019510	S-adenosylhomocysteine catabolic process	biological_process	8	TRINITY_DN124549_c8_g1	1	3857	3	25617	0.38711
GO:0009072	aromatic amino acid family metabolic process	biological_process	9	TRINITY_DN119713_c0_g1	1	3857	3	25617	0.38711
GO:0051573	negative regulation of histone H3-K9 methylation	biological_process	12	TRINITY_DN98078_c4_g1	1	3857	3	25617	0.38711
GO:0006271	DNA strand elongation involved in DNA replication	biological_process	9	TRINITY_DN114832_c0_g3	1	3857	3	25617	0.38711
GO:0070192	chromosome organization involved in meiotic cell cycle	biological_process	7	TRINITY_DN102531_c0_g1	1	3857	3	25617	0.38711
GO:0090503	RNA phosphodiester bond hydrolysis, exonucleolytic	biological_process	10	TRINITY_DN122464_c2_g1	1	3857	3	25617	0.38711
GO:0006109	regulation of carbohydrate metabolic process	biological_process	7	TRINITY_DN122637_c2_g1	1	3857	3	25617	0.38711
GO:0004807	triose-phosphate isomerase activity	molecular_function	7	TRINITY_DN108680_c0_g1	1	3857	3	25617	0.38711
GO:0071284	cellular response to lead ion	biological_process	8	TRINITY_DN106033_c0_g1	1	3857	3	25617	0.38711
GO:0019567	arabinose biosynthetic process	biological_process	9	TRINITY_DN96486_c0_g2	1	3857	3	25617	0.38711
GO:0006739	NADP metabolic process	biological_process	4	TRINITY_DN95006_c4_g3	1	3857	3	25617	0.38711
GO:0035194	posttranscriptional gene silencing by RNA	biological_process	10	TRINITY_DN101362_c0_g1	1	3857	3	25617	0.38711
GO:0032300	mismatch repair complex	cellular_component	5	TRINITY_DN123625_c3_g1	1	3857	3	25617	0.38711
GO:0009616	virus induced gene silencing	biological_process	6	TRINITY_DN101362_c0_g1	1	3857	3	25617	0.38711
GO:0042819	vitamin B6 biosynthetic process	biological_process	8	TRINITY_DN93651_c0_g1	1	3857	3	25617	0.38711
GO:0070601	centromeric sister chromatid cohesion	biological_process	6	TRINITY_DN117446_c0_g1	1	3857	3	25617	0.38711
GO:0043024	ribosomal small subunit binding	molecular_function	6	TRINITY_DN121135_c1_g2	1	3857	3	25617	0.38711
GO:0043086	negative regulation of catalytic activity	biological_process	6	TRINITY_DN95942_c0_g2	1	3857	3	25617	0.38711
GO:0008987	quinolinate synthetase A activity	molecular_function	6	TRINITY_DN122462_c2_g1	1	3857	3	25617	0.38711
GO:0010018	far-red light signaling pathway	biological_process	6	TRINITY_DN88780_c0_g1	1	3857	3	25617	0.38711
GO:0071266	'de novo' L-methionine biosynthetic process	biological_process	13	TRINITY_DN115296_c1_g1	1	3857	3	25617	0.38711
GO:1902265	abscisic acid homeostasis	biological_process	9	TRINITY_DN122362_c0_g1	1	3857	3	25617	0.38711
GO:0097298	regulation of nucleus size	biological_process	6	TRINITY_DN116167_c0_g1	1	3857	3	25617	0.38711
GO:0046029	mannitol dehydrogenase activity	molecular_function	7	TRINITY_DN94413_c0_g3	1	3857	3	25617	0.38711
GO:0047681	aryl-alcohol dehydrogenase (NADP+) activity	molecular_function	7	TRINITY_DN94413_c0_g3	1	3857	3	25617	0.38711
GO:0071007	U2-type catalytic step 2 spliceosome	cellular_component	8	TRINITY_DN113277_c3_g2	1	3857	3	25617	0.38711
GO:0019013	viral nucleocapsid	cellular_component	4	TRINITY_DN101977_c0_g4	1	3857	3	25617	0.38711
GO:0102131	3-oxo-glutaryl-[acp] methyl ester reductase activity	molecular_function	7	TRINITY_DN110834_c0_g3	1	3857	3	25617	0.38711
GO:0008272	sulfate transport	biological_process	9	TRINITY_DN109582_c2_g1	1	3857	3	25617	0.38711
GO:0007093	mitotic cell cycle checkpoint	biological_process	5	TRINITY_DN97481_c3_g5	1	3857	3	25617	0.38711
GO:0004316	3-oxoacyl-[acyl-carrier-protein] reductase (NADPH) activity	molecular_function	8	TRINITY_DN110834_c0_g3	1	3857	3	25617	0.38711
GO:0004853	uroporphyrinogen decarboxylase activity	molecular_function	7	TRINITY_DN115995_c0_g1	1	3857	3	25617	0.38711
GO:0000798	nuclear cohesin complex	cellular_component	5	TRINITY_DN117446_c0_g1	1	3857	3	25617	0.38711
GO:0005832	chaperonin-containing T-complex	cellular_component	7	TRINITY_DN107567_c2_g1	1	3857	3	25617	0.38711
GO:0006469	negative regulation of protein kinase activity	biological_process	11	TRINITY_DN99741_c1_g2	1	3857	3	25617	0.38711
GO:0031071	cysteine desulfurase activity	molecular_function	7	TRINITY_DN108561_c0_g2	1	3857	3	25617	0.38711
GO:0000104	succinate dehydrogenase activity	molecular_function	6	TRINITY_DN91062_c0_g1	1	3857	3	25617	0.38711
GO:0052866	phosphatidylinositol phosphate phosphatase activity	molecular_function	8	TRINITY_DN114455_c4_g1	1	3857	3	25617	0.38711
GO:0000987	proximal promoter sequence-specific DNA binding	molecular_function	9	TRINITY_DN88780_c0_g1	1	3857	3	25617	0.38711
GO:0000956	nuclear-transcribed mRNA catabolic process	biological_process	11	TRINITY_DN99001_c0_g1	1	3857	3	25617	0.38711
GO:0006086	acetyl-CoA biosynthetic process from pyruvate	biological_process	10	TRINITY_DN105094_c1_g2;TRINITY_DN112016_c0_g1;TRINITY_DN112016_c0_g2;TRINITY_DN117128_c0_g1	4	3857	21	25617	0.391577
GO:0009056	catabolic process	biological_process	4	TRINITY_DN102546_c3_g1;TRINITY_DN105753_c0_g2;TRINITY_DN89881_c0_g1;TRINITY_DN91846_c1_g1	4	3857	21	25617	0.391577
GO:0010628	positive regulation of gene expression	biological_process	8	TRINITY_DN105681_c0_g1;TRINITY_DN115997_c1_g1;TRINITY_DN122999_c0_g2;TRINITY_DN98078_c4_g1	4	3857	21	25617	0.391577
GO:0045548	phenylalanine ammonia-lyase activity	molecular_function	7	TRINITY_DN105957_c0_g1;TRINITY_DN123821_c2_g5;TRINITY_DN94239_c0_g4;TRINITY_DN94239_c0_g5	4	3857	21	25617	0.391577
GO:0010117	photoprotection	biological_process	7	TRINITY_DN114159_c1_g1;TRINITY_DN114159_c1_g2;TRINITY_DN122914_c1_g4	3	3857	15	25617	0.398248
GO:1902290	positive regulation of defense response to oomycetes	biological_process	8	TRINITY_DN113762_c0_g2;TRINITY_DN96387_c0_g1;TRINITY_DN98544_c0_g2	3	3857	15	25617	0.398248
GO:0004832	valine-tRNA ligase activity	molecular_function	7	TRINITY_DN100120_c0_g1;TRINITY_DN111726_c3_g2;TRINITY_DN124702_c0_g1	3	3857	15	25617	0.398248
GO:0010019	chloroplast-nucleus signaling pathway	biological_process	5	TRINITY_DN113509_c3_g2;TRINITY_DN113509_c3_g4;TRINITY_DN116249_c1_g1	3	3857	15	25617	0.398248
GO:0009610	response to symbiotic fungus	biological_process	8	TRINITY_DN108966_c1_g4;TRINITY_DN120461_c1_g1;TRINITY_DN90506_c1_g1	3	3857	15	25617	0.398248
GO:0048768	root hair cell tip growth	biological_process	8	TRINITY_DN102355_c0_g2;TRINITY_DN108149_c0_g3;TRINITY_DN118689_c0_g1	3	3857	15	25617	0.398248
GO:0009098	leucine biosynthetic process	biological_process	11	TRINITY_DN105895_c2_g1;TRINITY_DN110751_c0_g1;TRINITY_DN91588_c1_g3	3	3857	15	25617	0.398248
GO:0016604	nuclear body	cellular_component	7	TRINITY_DN114159_c1_g1;TRINITY_DN114159_c1_g2;TRINITY_DN122914_c1_g4	3	3857	15	25617	0.398248
GO:0006826	iron ion transport	biological_process	10	TRINITY_DN116391_c0_g1;TRINITY_DN120761_c0_g2;TRINITY_DN88931_c0_g1	3	3857	15	25617	0.398248
GO:0030619	U1 snRNA binding	molecular_function	8	TRINITY_DN107453_c1_g1;TRINITY_DN124784_c2_g1;TRINITY_DN125162_c2_g1	3	3857	15	25617	0.398248
GO:0031305	integral component of mitochondrial inner membrane	cellular_component	8	TRINITY_DN101709_c0_g3;TRINITY_DN110291_c3_g1;TRINITY_DN113448_c0_g1	3	3857	15	25617	0.398248
GO:0030968	endoplasmic reticulum unfolded protein response	biological_process	5	TRINITY_DN102263_c4_g2;TRINITY_DN114826_c1_g2;TRINITY_DN121978_c0_g1	3	3857	15	25617	0.398248
GO:0009641	shade avoidance	biological_process	8	TRINITY_DN119713_c0_g1;TRINITY_DN119970_c1_g3;TRINITY_DN99684_c0_g1	3	3857	15	25617	0.398248
GO:0070534	protein K63-linked ubiquitination	biological_process	13	TRINITY_DN102474_c1_g1;TRINITY_DN115969_c1_g4;TRINITY_DN115969_c1_g5	3	3857	15	25617	0.398248
GO:0033169	histone H3-K9 demethylation	biological_process	13	TRINITY_DN102598_c1_g1;TRINITY_DN121805_c1_g1;TRINITY_DN98078_c4_g1	3	3857	15	25617	0.398248
GO:0009522	photosystem I	cellular_component	7	TRINITY_DN103327_c1_g1;TRINITY_DN103420_c1_g2;TRINITY_DN106894_c2_g1	3	3857	15	25617	0.398248
GO:0006438	valyl-tRNA aminoacylation	biological_process	13	TRINITY_DN100120_c0_g1;TRINITY_DN111726_c3_g2;TRINITY_DN124702_c0_g1	3	3857	15	25617	0.398248
GO:0005876	spindle microtubule	cellular_component	8	TRINITY_DN111669_c0_g2;TRINITY_DN114435_c1_g2;TRINITY_DN118461_c1_g5	3	3857	15	25617	0.398248
GO:0048263	determination of dorsal identity	biological_process	7	TRINITY_DN100608_c0_g1;TRINITY_DN121689_c0_g2	2	3857	9	25617	0.402487
GO:0030008	TRAPP complex	cellular_component	5	TRINITY_DN102543_c0_g2;TRINITY_DN112347_c1_g2	2	3857	9	25617	0.402487
GO:0003860	3-hydroxyisobutyryl-CoA hydrolase activity	molecular_function	8	TRINITY_DN122960_c2_g1;TRINITY_DN91669_c0_g1	2	3857	9	25617	0.402487
GO:0070676	intralumenal vesicle formation	biological_process	8	TRINITY_DN106752_c1_g1;TRINITY_DN108158_c1_g1	2	3857	9	25617	0.402487
GO:0004362	glutathione-disulfide reductase activity	molecular_function	9	TRINITY_DN106316_c2_g2;TRINITY_DN99789_c0_g1	2	3857	9	25617	0.402487
GO:0000326	protein storage vacuole	cellular_component	8	TRINITY_DN119616_c2_g2;TRINITY_DN96670_c1_g1	2	3857	9	25617	0.402487
GO:0051123	RNA polymerase II transcriptional preinitiation complex assembly	biological_process	10	TRINITY_DN101108_c0_g1;TRINITY_DN107972_c0_g1	2	3857	9	25617	0.402487
GO:0004488	methylenetetrahydrofolate dehydrogenase (NADP+) activity	molecular_function	7	TRINITY_DN103588_c0_g1;TRINITY_DN98548_c5_g3	2	3857	9	25617	0.402487
GO:0006555	methionine metabolic process	biological_process	10	TRINITY_DN119713_c0_g1;TRINITY_DN95389_c2_g1	2	3857	9	25617	0.402487
GO:0004477	methenyltetrahydrofolate cyclohydrolase activity	molecular_function	8	TRINITY_DN103588_c0_g1;TRINITY_DN98548_c5_g3	2	3857	9	25617	0.402487
GO:0015210	uracil transmembrane transporter activity	molecular_function	7	TRINITY_DN123577_c4_g1;TRINITY_DN98970_c2_g2	2	3857	9	25617	0.402487
GO:0006672	ceramide metabolic process	biological_process	9	TRINITY_DN110146_c0_g4;TRINITY_DN86628_c0_g1	2	3857	9	25617	0.402487
GO:0009877	nodulation	biological_process	6	TRINITY_DN113762_c0_g2;TRINITY_DN123853_c6_g2	2	3857	9	25617	0.402487
GO:0046855	inositol phosphate dephosphorylation	biological_process	9	TRINITY_DN92964_c0_g2;TRINITY_DN99505_c5_g2	2	3857	9	25617	0.402487
GO:0010115	regulation of abscisic acid biosynthetic process	biological_process	8	TRINITY_DN105685_c2_g1;TRINITY_DN107017_c0_g1	2	3857	9	25617	0.402487
GO:0006518	peptide metabolic process	biological_process	7	TRINITY_DN122072_c1_g3;TRINITY_DN89575_c0_g1	2	3857	9	25617	0.402487
GO:0034497	protein localization to phagophore assembly site	biological_process	7	TRINITY_DN113643_c0_g1;TRINITY_DN122091_c1_g1	2	3857	9	25617	0.402487
GO:0009694	jasmonic acid metabolic process	biological_process	9	TRINITY_DN108813_c0_g2;TRINITY_DN108813_c1_g1	2	3857	9	25617	0.402487
GO:2001141	regulation of RNA biosynthetic process	biological_process	8	TRINITY_DN94715_c0_g1;TRINITY_DN99667_c0_g1	2	3857	9	25617	0.402487
GO:0005978	glycogen biosynthetic process	biological_process	10	TRINITY_DN113221_c0_g2;TRINITY_DN119253_c1_g1	2	3857	9	25617	0.402487
GO:0080060	integument development	biological_process	5	TRINITY_DN100608_c0_g1;TRINITY_DN121689_c0_g2	2	3857	9	25617	0.402487
GO:0010196	nonphotochemical quenching	biological_process	8	TRINITY_DN115898_c1_g1;TRINITY_DN94904_c0_g1	2	3857	9	25617	0.402487
GO:0009585	red, far-red light phototransduction	biological_process	6	TRINITY_DN110857_c0_g2;TRINITY_DN116249_c1_g1;TRINITY_DN117654_c0_g1;TRINITY_DN117904_c1_g1;TRINITY_DN124416_c4_g4;TRINITY_DN125060_c9_g2;TRINITY_DN88780_c0_g1;TRINITY_DN98025_c0_g1;TRINITY_DN99684_c0_g1	9	3857	53	25617	0.40407
GO:0051087	chaperone binding	molecular_function	5	TRINITY_DN114954_c1_g4;TRINITY_DN118645_c2_g2;TRINITY_DN121313_c1_g1;TRINITY_DN94717_c2_g1;TRINITY_DN97523_c1_g1;TRINITY_DN98951_c0_g1	6	3857	34	25617	0.406333
GO:0030126	COPI vesicle coat	cellular_component	8	TRINITY_DN106645_c1_g1;TRINITY_DN118862_c1_g3;TRINITY_DN122863_c1_g1;TRINITY_DN89001_c0_g1;TRINITY_DN93735_c4_g6;TRINITY_DN94401_c1_g2	6	3857	34	25617	0.406333
GO:0017148	negative regulation of translation	biological_process	10	TRINITY_DN104030_c2_g2;TRINITY_DN104795_c0_g1;TRINITY_DN104828_c0_g1;TRINITY_DN112786_c0_g1;TRINITY_DN115576_c0_g1;TRINITY_DN97485_c0_g1	6	3857	34	25617	0.406333
GO:0006970	response to osmotic stress	biological_process	5	TRINITY_DN101261_c2_g1;TRINITY_DN104655_c1_g1;TRINITY_DN106910_c1_g1;TRINITY_DN107900_c1_g1;TRINITY_DN108417_c1_g2;TRINITY_DN109415_c1_g1;TRINITY_DN112814_c0_g1;TRINITY_DN113643_c0_g1;TRINITY_DN113672_c1_g4;TRINITY_DN114455_c4_g1;TRINITY_DN116864_c4_g1;TRINITY_DN119159_c6_g1;TRINITY_DN120688_c0_g1;TRINITY_DN121493_c0_g1;TRINITY_DN122362_c0_g1;TRINITY_DN123937_c2_g1;TRINITY_DN124710_c4_g1;TRINITY_…	20	3857	124	25617	0.406476
GO:0004693	cyclin-dependent protein serine/threonine kinase activity	molecular_function	9	TRINITY_DN102456_c1_g1;TRINITY_DN115354_c1_g2;TRINITY_DN122736_c1_g1;TRINITY_DN123947_c3_g1;TRINITY_DN89234_c0_g1;TRINITY_DN94340_c4_g2;TRINITY_DN99918_c1_g1;TRINITY_DN99918_c1_g2	8	3857	47	25617	0.413316
GO:0070628	proteasome binding	molecular_function	5	TRINITY_DN107744_c2_g1;TRINITY_DN123349_c1_g1;TRINITY_DN95262_c5_g1;TRINITY_DN97648_c0_g1;TRINITY_DN98105_c0_g1	5	3857	28	25617	0.416403
GO:0007346	regulation of mitotic cell cycle	biological_process	7	TRINITY_DN102456_c1_g1;TRINITY_DN115354_c1_g2;TRINITY_DN122344_c1_g2;TRINITY_DN122736_c1_g1;TRINITY_DN94340_c4_g2	5	3857	28	25617	0.416403
GO:0006289	nucleotide-excision repair	biological_process	9	TRINITY_DN107748_c0_g1;TRINITY_DN115437_c0_g1;TRINITY_DN120775_c0_g1;TRINITY_DN123349_c1_g1;TRINITY_DN94178_c0_g2	5	3857	28	25617	0.416403
GO:0005839	proteasome core complex	cellular_component	4	TRINITY_DN107416_c1_g1;TRINITY_DN109367_c0_g3;TRINITY_DN119964_c3_g1;TRINITY_DN95883_c1_g1;TRINITY_DN97181_c0_g1	5	3857	28	25617	0.416403
GO:0006559	L-phenylalanine catabolic process	biological_process	11	TRINITY_DN105957_c0_g1;TRINITY_DN116452_c0_g1;TRINITY_DN123821_c2_g5;TRINITY_DN94239_c0_g4;TRINITY_DN94239_c0_g5	5	3857	28	25617	0.416403
GO:0018024	histone-lysine N-methyltransferase activity	molecular_function	9	TRINITY_DN108017_c2_g1;TRINITY_DN114057_c0_g1;TRINITY_DN115881_c0_g1;TRINITY_DN121081_c0_g1;TRINITY_DN121081_c0_g2	5	3857	28	25617	0.416403
GO:0006888	ER to Golgi vesicle-mediated transport	biological_process	7	TRINITY_DN101005_c0_g3;TRINITY_DN102116_c1_g1;TRINITY_DN102543_c0_g2;TRINITY_DN103999_c2_g1;TRINITY_DN106645_c1_g1;TRINITY_DN111099_c0_g2;TRINITY_DN112347_c1_g2;TRINITY_DN118862_c1_g3;TRINITY_DN120236_c0_g4;TRINITY_DN122091_c1_g1;TRINITY_DN122863_c1_g1;TRINITY_DN123561_c3_g3;TRINITY_DN123919_c3_g1;TRINITY_DN124191_c1_g1;TRINITY_DN89001_c0_g1;TRINITY_DN93596_c0_g3;TRINITY_DN93596_c0_g4;TRINITY_DN9…	18	3857	112	25617	0.421405
GO:0009631	cold acclimation	biological_process	6	TRINITY_DN107226_c0_g1;TRINITY_DN110857_c0_g2;TRINITY_DN110978_c2_g2;TRINITY_DN121580_c1_g2;TRINITY_DN79770_c0_g1;TRINITY_DN90506_c1_g1;TRINITY_DN97133_c0_g1	7	3857	41	25617	0.423498
GO:0005355	glucose transmembrane transporter activity	molecular_function	9	TRINITY_DN101674_c2_g1;TRINITY_DN109975_c0_g1;TRINITY_DN113903_c1_g1;TRINITY_DN117707_c0_g2;TRINITY_DN123232_c3_g2;TRINITY_DN123917_c4_g2;TRINITY_DN86480_c0_g1	7	3857	41	25617	0.423498
GO:0019898	extrinsic component of membrane	cellular_component	4	TRINITY_DN104049_c0_g1;TRINITY_DN106920_c3_g3;TRINITY_DN107603_c1_g3;TRINITY_DN111847_c1_g5;TRINITY_DN113643_c0_g1;TRINITY_DN118632_c0_g1;TRINITY_DN119544_c1_g1;TRINITY_DN122698_c4_g1;TRINITY_DN99724_c0_g5	9	3857	54	25617	0.426895
GO:0000103	sulfate assimilation	biological_process	6	TRINITY_DN103978_c0_g1;TRINITY_DN108477_c0_g2;TRINITY_DN109342_c2_g6;TRINITY_DN114897_c0_g3;TRINITY_DN116450_c1_g1;TRINITY_DN91647_c0_g1;TRINITY_DN95942_c0_g2;TRINITY_DN97169_c1_g1;TRINITY_DN98020_c0_g1	9	3857	54	25617	0.426895
GO:0018279	protein N-linked glycosylation via asparagine	biological_process	11	TRINITY_DN107409_c0_g1;TRINITY_DN117987_c2_g4;TRINITY_DN123516_c5_g2;TRINITY_DN123745_c2_g1	4	3857	22	25617	0.427824
GO:0008026	ATP-dependent helicase activity	molecular_function	10	TRINITY_DN116194_c0_g2;TRINITY_DN117145_c0_g1;TRINITY_DN120775_c0_g1;TRINITY_DN93469_c0_g2	4	3857	22	25617	0.427824
GO:0007155	cell adhesion	biological_process	4	TRINITY_DN105028_c0_g2;TRINITY_DN108763_c1_g2;TRINITY_DN121206_c1_g1;TRINITY_DN98105_c0_g1	4	3857	22	25617	0.427824
GO:0004526	ribonuclease P activity	molecular_function	9	TRINITY_DN100840_c2_g1;TRINITY_DN102457_c0_g2;TRINITY_DN107403_c1_g1;TRINITY_DN121625_c2_g1	4	3857	22	25617	0.427824
GO:0007049	cell cycle	biological_process	4	TRINITY_DN109538_c0_g1;TRINITY_DN109564_c3_g2;TRINITY_DN113175_c1_g1;TRINITY_DN113497_c1_g4;TRINITY_DN113497_c1_g5;TRINITY_DN113885_c1_g1;TRINITY_DN114448_c1_g5;TRINITY_DN115014_c0_g1;TRINITY_DN115354_c1_g2;TRINITY_DN115644_c0_g1;TRINITY_DN117976_c0_g5;TRINITY_DN119544_c1_g1;TRINITY_DN119722_c1_g2;TRINITY_DN121327_c1_g1;TRINITY_DN124083_c0_g1;TRINITY_DN124803_c4_g5;TRINITY_DN124900_c2_g1;TRINITY_…	21	3857	132	25617	0.428541
GO:0016298	lipase activity	molecular_function	6	TRINITY_DN102442_c1_g1;TRINITY_DN108414_c0_g1;TRINITY_DN111421_c1_g1;TRINITY_DN111421_c1_g2;TRINITY_DN111791_c3_g3;TRINITY_DN112238_c0_g2;TRINITY_DN113969_c0_g1;TRINITY_DN119864_c0_g3;TRINITY_DN121291_c1_g1;TRINITY_DN122310_c1_g2;TRINITY_DN94245_c0_g1;TRINITY_DN98654_c2_g1;TRINITY_DN99057_c0_g2	13	3857	80	25617	0.429361
GO:0031902	late endosome membrane	cellular_component	9	TRINITY_DN101117_c1_g1;TRINITY_DN106752_c1_g1;TRINITY_DN108158_c1_g1;TRINITY_DN116355_c1_g1;TRINITY_DN119654_c1_g1;TRINITY_DN121193_c1_g1	6	3857	35	25617	0.434899
GO:0042277	peptide binding	molecular_function	5	TRINITY_DN103191_c0_g1;TRINITY_DN107409_c1_g3;TRINITY_DN107409_c1_g5;TRINITY_DN121928_c0_g1;TRINITY_DN122476_c2_g1;TRINITY_DN91248_c0_g1	6	3857	35	25617	0.434899
GO:0031386	protein tag	molecular_function	3	TRINITY_DN108272_c6_g1;TRINITY_DN119427_c0_g1;TRINITY_DN120707_c4_g2;TRINITY_DN125176_c10_g1;TRINITY_DN92461_c0_g3;TRINITY_DN97648_c0_g1	6	3857	35	25617	0.434899
GO:0043424	protein histidine kinase binding	molecular_function	8	TRINITY_DN101222_c0_g1;TRINITY_DN106049_c0_g1;TRINITY_DN109582_c2_g1;TRINITY_DN118669_c4_g1;TRINITY_DN90351_c6_g1;TRINITY_DN91570_c1_g3	6	3857	35	25617	0.434899
GO:0008152	metabolic process	biological_process	3	TRINITY_DN101039_c0_g1;TRINITY_DN106728_c0_g2;TRINITY_DN107936_c1_g1;TRINITY_DN108106_c0_g3;TRINITY_DN108337_c0_g1;TRINITY_DN108629_c0_g1;TRINITY_DN113983_c2_g2;TRINITY_DN114773_c2_g4;TRINITY_DN117335_c2_g1;TRINITY_DN122168_c0_g1;TRINITY_DN122193_c0_g2;TRINITY_DN91011_c0_g1;TRINITY_DN91665_c0_g1;TRINITY_DN97936_c0_g4	14	3857	87	25617	0.438519
GO:0006607	NLS-bearing protein import into nucleus	biological_process	12	TRINITY_DN108566_c1_g4;TRINITY_DN109009_c0_g2;TRINITY_DN111299_c1_g3;TRINITY_DN113899_c0_g2;TRINITY_DN119325_c1_g1;TRINITY_DN120947_c1_g1;TRINITY_DN88620_c0_g1;TRINITY_DN94498_c6_g1;TRINITY_DN97613_c0_g2;TRINITY_DN99389_c1_g3	10	3857	61	25617	0.438654
GO:0030048	actin filament-based movement	biological_process	5	TRINITY_DN108149_c0_g3;TRINITY_DN117956_c1_g1;TRINITY_DN122362_c0_g1	3	3857	16	25617	0.44122
GO:0008235	metalloexopeptidase activity	molecular_function	8	TRINITY_DN110611_c1_g1;TRINITY_DN119189_c3_g2;TRINITY_DN121600_c1_g1	3	3857	16	25617	0.44122
GO:0071010	prespliceosome	cellular_component	7	TRINITY_DN121847_c0_g1;TRINITY_DN124536_c2_g1;TRINITY_DN88458_c0_g3	3	3857	16	25617	0.44122
GO:0044774	mitotic DNA integrity checkpoint	biological_process	6	TRINITY_DN109659_c1_g1;TRINITY_DN122961_c2_g2;TRINITY_DN94387_c1_g1	3	3857	16	25617	0.44122
GO:0006833	water transport	biological_process	7	TRINITY_DN112036_c0_g2;TRINITY_DN116518_c2_g2;TRINITY_DN91507_c0_g3	3	3857	16	25617	0.44122
GO:0010256	endomembrane system organization	biological_process	5	TRINITY_DN100807_c0_g1;TRINITY_DN104005_c3_g1;TRINITY_DN125057_c2_g2	3	3857	16	25617	0.44122
GO:0010629	negative regulation of gene expression	biological_process	8	TRINITY_DN106123_c0_g1;TRINITY_DN110997_c0_g2;TRINITY_DN111782_c0_g2	3	3857	16	25617	0.44122
GO:0000819	sister chromatid segregation	biological_process	7	TRINITY_DN109659_c1_g1;TRINITY_DN122961_c2_g2;TRINITY_DN94387_c1_g1	3	3857	16	25617	0.44122
GO:0000175	3'-5'-exoribonuclease activity	molecular_function	9	TRINITY_DN105530_c0_g2;TRINITY_DN122569_c0_g2;TRINITY_DN123874_c2_g1	3	3857	16	25617	0.44122
GO:0071805	potassium ion transmembrane transport	biological_process	10	TRINITY_DN101767_c1_g1;TRINITY_DN112606_c0_g1;TRINITY_DN117565_c0_g2	3	3857	16	25617	0.44122
GO:0070006	metalloaminopeptidase activity	molecular_function	9	TRINITY_DN103191_c0_g1;TRINITY_DN107409_c1_g3;TRINITY_DN107409_c1_g5;TRINITY_DN122476_c2_g1;TRINITY_DN91248_c0_g1	5	3857	29	25617	0.447968
GO:0030145	manganese ion binding	molecular_function	8	TRINITY_DN106352_c0_g3;TRINITY_DN119189_c3_g2;TRINITY_DN119536_c1_g1;TRINITY_DN121600_c1_g1;TRINITY_DN121689_c0_g3	5	3857	29	25617	0.447968
GO:0004298	threonine-type endopeptidase activity	molecular_function	8	TRINITY_DN107416_c1_g1;TRINITY_DN109367_c0_g3;TRINITY_DN119964_c3_g1;TRINITY_DN95883_c1_g1;TRINITY_DN97181_c0_g1	5	3857	29	25617	0.447968
GO:0031624	ubiquitin conjugating enzyme binding	molecular_function	7	TRINITY_DN104134_c0_g1;TRINITY_DN117620_c3_g1;TRINITY_DN118638_c1_g1;TRINITY_DN118789_c6_g1;TRINITY_DN97555_c0_g1	5	3857	29	25617	0.447968
GO:0005762	mitochondrial large ribosomal subunit	cellular_component	9	TRINITY_DN101594_c0_g1;TRINITY_DN104946_c1_g1;TRINITY_DN109331_c1_g3;TRINITY_DN110861_c0_g2;TRINITY_DN86437_c0_g1	5	3857	29	25617	0.447968
GO:0009833	plant-type primary cell wall biogenesis	biological_process	7	TRINITY_DN100202_c1_g1;TRINITY_DN103589_c1_g3;TRINITY_DN104260_c1_g3;TRINITY_DN107949_c0_g2;TRINITY_DN118188_c0_g1;TRINITY_DN118753_c0_g2;TRINITY_DN119045_c3_g3;TRINITY_DN119045_c3_g4;TRINITY_DN119045_c3_g5;TRINITY_DN120616_c2_g5;TRINITY_DN95683_c2_g2	11	3857	68	25617	0.449026
GO:0004197	cysteine-type endopeptidase activity	molecular_function	8	TRINITY_DN103540_c0_g1;TRINITY_DN105818_c1_g1;TRINITY_DN112162_c0_g1;TRINITY_DN112362_c4_g5;TRINITY_DN114139_c1_g3;TRINITY_DN115291_c0_g2;TRINITY_DN116495_c0_g1;TRINITY_DN116976_c0_g1;TRINITY_DN118463_c0_g1;TRINITY_DN119090_c0_g1;TRINITY_DN99766_c0_g2	11	3857	68	25617	0.449026
GO:0030705	cytoskeleton-dependent intracellular transport	biological_process	7	TRINITY_DN121486_c0_g2;TRINITY_DN124985_c8_g1	2	3857	10	25617	0.457799
GO:0004470	malic enzyme activity	molecular_function	7	TRINITY_DN101310_c1_g1;TRINITY_DN119995_c0_g1	2	3857	10	25617	0.457799
GO:0015930	glutamate synthase activity	molecular_function	6	TRINITY_DN123289_c0_g1;TRINITY_DN124145_c0_g1	2	3857	10	25617	0.457799
GO:0033353	S-adenosylmethionine cycle	biological_process	6	TRINITY_DN124549_c8_g1;TRINITY_DN98571_c1_g2	2	3857	10	25617	0.457799
GO:0043141	ATP-dependent 5'-3' DNA helicase activity	molecular_function	12	TRINITY_DN114872_c2_g1;TRINITY_DN124281_c1_g1	2	3857	10	25617	0.457799
GO:0006605	protein targeting	biological_process	11	TRINITY_DN110811_c0_g3;TRINITY_DN119616_c3_g1	2	3857	10	25617	0.457799
GO:0042023	DNA endoreduplication	biological_process	11	TRINITY_DN109374_c1_g2;TRINITY_DN94340_c4_g2	2	3857	10	25617	0.457799
GO:0016246	RNA interference	biological_process	11	TRINITY_DN119959_c1_g1;TRINITY_DN122399_c0_g2	2	3857	10	25617	0.457799
GO:0006189	'de novo' IMP biosynthetic process	biological_process	13	TRINITY_DN123286_c0_g1;TRINITY_DN123788_c8_g2	2	3857	10	25617	0.457799
GO:0035671	enone reductase activity	molecular_function	7	TRINITY_DN116472_c1_g1;TRINITY_DN91811_c1_g1	2	3857	10	25617	0.457799
GO:0004124	cysteine synthase activity	molecular_function	6	TRINITY_DN111745_c0_g2;TRINITY_DN119445_c0_g1	2	3857	10	25617	0.457799
GO:0004471	malate dehydrogenase (decarboxylating) (NAD+) activity	molecular_function	8	TRINITY_DN101310_c1_g1;TRINITY_DN119995_c0_g1	2	3857	10	25617	0.457799
GO:0004322	ferroxidase activity	molecular_function	7	TRINITY_DN116391_c0_g1;TRINITY_DN88931_c0_g1	2	3857	10	25617	0.457799
GO:0003878	ATP citrate synthase activity	molecular_function	7	TRINITY_DN110843_c0_g1;TRINITY_DN110843_c0_g2	2	3857	10	25617	0.457799
GO:0034427	nuclear-transcribed mRNA catabolic process, exonucleolytic, 3'-5'	biological_process	13	TRINITY_DN103402_c1_g1;TRINITY_DN106573_c1_g1	2	3857	10	25617	0.457799
GO:0006744	ubiquinone biosynthetic process	biological_process	9	TRINITY_DN120380_c1_g4;TRINITY_DN121013_c0_g2	2	3857	10	25617	0.457799
GO:0005047	signal recognition particle binding	molecular_function	6	TRINITY_DN110811_c0_g3;TRINITY_DN119020_c0_g3	2	3857	10	25617	0.457799
GO:0012501	programmed cell death	biological_process	5	TRINITY_DN103842_c3_g1;TRINITY_DN120688_c0_g1	2	3857	10	25617	0.457799
GO:0005688	U6 snRNP	cellular_component	8	TRINITY_DN101977_c0_g4;TRINITY_DN99001_c0_g1	2	3857	10	25617	0.457799
GO:0045927	positive regulation of growth	biological_process	6	TRINITY_DN107083_c0_g1;TRINITY_DN107140_c1_g1	2	3857	10	25617	0.457799
GO:0008610	lipid biosynthetic process	biological_process	6	TRINITY_DN103442_c0_g1;TRINITY_DN119311_c1_g2	2	3857	10	25617	0.457799
GO:0010050	vegetative phase change	biological_process	5	TRINITY_DN113965_c0_g1;TRINITY_DN124388_c5_g2	2	3857	10	25617	0.457799
GO:0000293	ferric-chelate reductase activity	molecular_function	7	TRINITY_DN108781_c0_g1;TRINITY_DN119920_c0_g1	2	3857	10	25617	0.457799
GO:0002109	maturation of SSU-rRNA from tricistronic rRNA transcript (SSU-rRNA, LSU-rRNA,5S)	biological_process	13	TRINITY_DN108272_c6_g1;TRINITY_DN120707_c4_g2	2	3857	10	25617	0.457799
GO:0055062	phosphate ion homeostasis	biological_process	10	TRINITY_DN92022_c0_g1;TRINITY_DN95552_c2_g1	2	3857	10	25617	0.457799
GO:0090305	nucleic acid phosphodiester bond hydrolysis	biological_process	8	TRINITY_DN102531_c0_g1;TRINITY_DN96030_c0_g1	2	3857	10	25617	0.457799
GO:0031209	SCAR complex	cellular_component	4	TRINITY_DN117403_c0_g1;TRINITY_DN122170_c1_g1	2	3857	10	25617	0.457799
GO:0080147	root hair cell development	biological_process	6	TRINITY_DN118689_c0_g1;TRINITY_DN122923_c2_g2	2	3857	10	25617	0.457799
GO:0004802	transketolase activity	molecular_function	6	TRINITY_DN105884_c2_g1;TRINITY_DN124059_c3_g1	2	3857	10	25617	0.457799
GO:0034051	negative regulation of plant-type hypersensitive response	biological_process	9	TRINITY_DN115110_c1_g1;TRINITY_DN118701_c3_g1	2	3857	10	25617	0.457799
GO:0008199	ferric iron binding	molecular_function	9	TRINITY_DN116391_c0_g1;TRINITY_DN88931_c0_g1	2	3857	10	25617	0.457799
GO:0045038	protein import into chloroplast thylakoid membrane	biological_process	13	TRINITY_DN111860_c1_g1;TRINITY_DN116222_c0_g1	2	3857	10	25617	0.457799
GO:0016652	oxidoreductase activity, acting on NAD(P)H, NAD(P) as acceptor	molecular_function	6	TRINITY_DN101310_c1_g1;TRINITY_DN119995_c0_g1	2	3857	10	25617	0.457799
GO:0004659	prenyltransferase activity	molecular_function	6	TRINITY_DN101445_c1_g1;TRINITY_DN120380_c1_g4	2	3857	10	25617	0.457799
GO:0009687	abscisic acid metabolic process	biological_process	10	TRINITY_DN107673_c0_g1;TRINITY_DN116382_c0_g1	2	3857	10	25617	0.457799
GO:0015630	microtubule cytoskeleton	cellular_component	7	TRINITY_DN101564_c1_g5;TRINITY_DN112579_c0_g2	2	3857	10	25617	0.457799
GO:0003910	DNA ligase (ATP) activity	molecular_function	7	TRINITY_DN119664_c1_g1;TRINITY_DN125071_c2_g2	2	3857	10	25617	0.457799
GO:0070301	cellular response to hydrogen peroxide	biological_process	8	TRINITY_DN105491_c1_g3;TRINITY_DN118935_c0_g1	2	3857	10	25617	0.457799
GO:0034475	U4 snRNA 3'-end processing	biological_process	13	TRINITY_DN103402_c1_g1;TRINITY_DN106573_c1_g1	2	3857	10	25617	0.457799
GO:0006999	nuclear pore organization	biological_process	7	TRINITY_DN120947_c1_g1;TRINITY_DN92286_c0_g2	2	3857	10	25617	0.457799
GO:0080156	mitochondrial mRNA modification	biological_process	11	TRINITY_DN103003_c0_g3;TRINITY_DN96234_c1_g3	2	3857	10	25617	0.457799
GO:0010162	seed dormancy process	biological_process	5	TRINITY_DN113708_c0_g1;TRINITY_DN96407_c0_g5	2	3857	10	25617	0.457799
GO:0016987	bacterial sigma factor activity	molecular_function	4	TRINITY_DN94715_c0_g1;TRINITY_DN99667_c0_g1	2	3857	10	25617	0.457799
GO:0070300	phosphatidic acid binding	molecular_function	6	TRINITY_DN114455_c4_g1;TRINITY_DN118302_c1_g1	2	3857	10	25617	0.457799
GO:0016120	carotene biosynthetic process	biological_process	10	TRINITY_DN100308_c0_g1;TRINITY_DN122569_c0_g2	2	3857	10	25617	0.457799
GO:0009346	citrate lyase complex	cellular_component	4	TRINITY_DN110843_c0_g1;TRINITY_DN110843_c0_g2	2	3857	10	25617	0.457799
GO:0003785	actin monomer binding	molecular_function	7	TRINITY_DN106927_c3_g3;TRINITY_DN119287_c0_g2	2	3857	10	25617	0.457799
GO:0008168	methyltransferase activity	molecular_function	6	TRINITY_DN102676_c0_g1;TRINITY_DN103036_c3_g1;TRINITY_DN106430_c0_g2;TRINITY_DN108282_c2_g1;TRINITY_DN109240_c2_g2;TRINITY_DN113890_c1_g1;TRINITY_DN116896_c0_g2;TRINITY_DN119640_c3_g3;TRINITY_DN120596_c0_g2;TRINITY_DN94154_c2_g1;TRINITY_DN98368_c1_g1;TRINITY_DN99876_c0_g1	12	3857	75	25617	0.458307
GO:0009909	regulation of flower development	biological_process	8	TRINITY_DN105126_c0_g5;TRINITY_DN112363_c0_g1;TRINITY_DN114359_c1_g2;TRINITY_DN114530_c0_g1;TRINITY_DN117654_c0_g1;TRINITY_DN119970_c1_g3;TRINITY_DN120570_c2_g1;TRINITY_DN80889_c0_g1;TRINITY_DN94973_c0_g1;TRINITY_DN99440_c3_g1	10	3857	62	25617	0.460114
GO:0000028	ribosomal small subunit assembly	biological_process	9	TRINITY_DN100436_c0_g3;TRINITY_DN101645_c0_g1;TRINITY_DN102671_c1_g1;TRINITY_DN106637_c0_g1;TRINITY_DN108272_c6_g1;TRINITY_DN112134_c0_g4;TRINITY_DN116502_c3_g2;TRINITY_DN120707_c4_g2;TRINITY_DN95462_c1_g2;TRINITY_DN97803_c2_g1	10	3857	62	25617	0.460114
GO:0009825	multidimensional cell growth	biological_process	5	TRINITY_DN107949_c0_g2;TRINITY_DN111564_c0_g1;TRINITY_DN116124_c2_g2;TRINITY_DN119045_c3_g3;TRINITY_DN119045_c3_g4;TRINITY_DN119045_c3_g5;TRINITY_DN121816_c2_g1;TRINITY_DN95683_c2_g2	8	3857	49	25617	0.461825
GO:0016758	transferase activity, transferring hexosyl groups	molecular_function	6	TRINITY_DN105028_c0_g2;TRINITY_DN107741_c0_g1;TRINITY_DN113434_c0_g2;TRINITY_DN114546_c1_g1;TRINITY_DN114697_c0_g1;TRINITY_DN117232_c0_g1;TRINITY_DN118347_c0_g1;TRINITY_DN122923_c2_g2	8	3857	49	25617	0.461825
GO:0034620	cellular response to unfolded protein	biological_process	7	TRINITY_DN103107_c0_g1;TRINITY_DN110030_c2_g4;TRINITY_DN118994_c1_g2;TRINITY_DN120929_c0_g1;TRINITY_DN121313_c1_g1;TRINITY_DN94717_c2_g1	6	3857	36	25617	0.46321
GO:0080022	primary root development	biological_process	7	TRINITY_DN112986_c1_g1;TRINITY_DN119654_c1_g1;TRINITY_DN93814_c0_g1;TRINITY_DN95543_c2_g2	4	3857	23	25617	0.463476
GO:0016831	carboxy-lyase activity	molecular_function	6	TRINITY_DN106212_c0_g1;TRINITY_DN120580_c0_g1;TRINITY_DN123908_c4_g1;TRINITY_DN98178_c1_g4	4	3857	23	25617	0.463476
GO:0005689	U12-type spliceosomal complex	cellular_component	7	TRINITY_DN103947_c0_g1;TRINITY_DN124299_c2_g2;TRINITY_DN88458_c0_g3;TRINITY_DN91459_c0_g3	4	3857	23	25617	0.463476
GO:0010197	polar nucleus fusion	biological_process	8	TRINITY_DN107094_c1_g1;TRINITY_DN107360_c0_g1;TRINITY_DN108966_c1_g4;TRINITY_DN121115_c1_g1	4	3857	23	25617	0.463476
GO:2000028	regulation of photoperiodism, flowering	biological_process	8	TRINITY_DN102598_c1_g1;TRINITY_DN104402_c2_g2;TRINITY_DN112647_c1_g2;TRINITY_DN92389_c0_g1	4	3857	23	25617	0.463476
GO:0010020	chloroplast fission	biological_process	8	TRINITY_DN117994_c2_g1;TRINITY_DN118089_c0_g1;TRINITY_DN124900_c2_g1;TRINITY_DN93396_c3_g2	4	3857	23	25617	0.463476
GO:0090502	RNA phosphodiester bond hydrolysis, endonucleolytic	biological_process	10	TRINITY_DN100840_c2_g1;TRINITY_DN102457_c0_g2;TRINITY_DN106099_c0_g1;TRINITY_DN107403_c1_g1	4	3857	23	25617	0.463476
GO:0008285	negative regulation of cell proliferation	biological_process	7	TRINITY_DN105276_c0_g1;TRINITY_DN115810_c2_g1;TRINITY_DN121159_c2_g1;TRINITY_DN121159_c2_g3	4	3857	23	25617	0.463476
GO:0009626	plant-type hypersensitive response	biological_process	6	TRINITY_DN102442_c1_g1;TRINITY_DN103575_c0_g1;TRINITY_DN104316_c1_g3;TRINITY_DN108414_c0_g1;TRINITY_DN111421_c1_g1;TRINITY_DN115110_c1_g1;TRINITY_DN115195_c2_g3;TRINITY_DN118082_c0_g1;TRINITY_DN119272_c1_g2;TRINITY_DN119628_c1_g7;TRINITY_DN121291_c1_g1;TRINITY_DN123640_c1_g1;TRINITY_DN88071_c0_g3;TRINITY_DN94413_c0_g3;TRINITY_DN98654_c2_g1	15	3857	95	25617	0.464234
GO:0010205	photoinhibition	biological_process	9	TRINITY_DN102888_c0_g4;TRINITY_DN111847_c1_g5;TRINITY_DN99707_c0_g3;TRINITY_DN99724_c0_g5;TRINITY_DN99741_c1_g2	5	3857	30	25617	0.479072
GO:0010152	pollen maturation	biological_process	5	TRINITY_DN109580_c1_g1;TRINITY_DN113885_c1_g1;TRINITY_DN116388_c0_g2;TRINITY_DN119067_c1_g1;TRINITY_DN121327_c1_g1	5	3857	30	25617	0.479072
GO:0006352	DNA-templated transcription, initiation	biological_process	8	TRINITY_DN102402_c0_g1;TRINITY_DN119777_c1_g1;TRINITY_DN119777_c1_g3;TRINITY_DN94715_c0_g1;TRINITY_DN99667_c0_g1	5	3857	30	25617	0.479072
GO:0004725	protein tyrosine phosphatase activity	molecular_function	9	TRINITY_DN109580_c1_g1;TRINITY_DN114455_c4_g1;TRINITY_DN116388_c0_g2;TRINITY_DN124048_c5_g1;TRINITY_DN125076_c7_g1	5	3857	30	25617	0.479072
GO:0009697	salicylic acid biosynthetic process	biological_process	8	TRINITY_DN124004_c6_g1	1	3857	4	25617	0.4794
GO:0048598	embryonic morphogenesis	biological_process	5	TRINITY_DN105545_c0_g1	1	3857	4	25617	0.4794
GO:0030091	protein repair	biological_process	8	TRINITY_DN96568_c0_g1	1	3857	4	25617	0.4794
GO:1902456	regulation of stomatal opening	biological_process	7	TRINITY_DN99741_c1_g2	1	3857	4	25617	0.4794
GO:1990585	hydroxyproline O-arabinosyltransferase activity	molecular_function	7	TRINITY_DN106970_c0_g2	1	3857	4	25617	0.4794
GO:1902806	regulation of cell cycle G1/S phase transition	biological_process	9	TRINITY_DN94340_c4_g2	1	3857	4	25617	0.4794
GO:0010318	pyrophosphate-dependent phosphofructokinase complex, beta-subunit complex	cellular_component	4	TRINITY_DN92834_c0_g3	1	3857	4	25617	0.4794
GO:0006637	acyl-CoA metabolic process	biological_process	7	TRINITY_DN120291_c1_g2	1	3857	4	25617	0.4794
GO:0008324	cation transmembrane transporter activity	molecular_function	6	TRINITY_DN122764_c0_g2	1	3857	4	25617	0.4794
GO:0051782	negative regulation of cell division	biological_process	7	TRINITY_DN116733_c0_g1	1	3857	4	25617	0.4794
GO:0030527	structural constituent of chromatin	molecular_function	4	TRINITY_DN104767_c0_g1	1	3857	4	25617	0.4794
GO:0046907	intracellular transport	biological_process	6	TRINITY_DN119616_c2_g2	1	3857	4	25617	0.4794
GO:0008878	glucose-1-phosphate adenylyltransferase activity	molecular_function	8	TRINITY_DN119253_c1_g1	1	3857	4	25617	0.4794
GO:0080130	L-phenylalanine:2-oxoglutarate aminotransferase activity	molecular_function	8	TRINITY_DN119713_c0_g1	1	3857	4	25617	0.4794
GO:0004516	nicotinate phosphoribosyltransferase activity	molecular_function	6	TRINITY_DN98120_c0_g2	1	3857	4	25617	0.4794
GO:0010100	negative regulation of photomorphogenesis	biological_process	9	TRINITY_DN92607_c0_g1	1	3857	4	25617	0.4794
GO:0090436	leaf pavement cell development	biological_process	6	TRINITY_DN108149_c0_g3	1	3857	4	25617	0.4794
GO:0010178	IAA-amino acid conjugate hydrolase activity	molecular_function	6	TRINITY_DN112080_c1_g1	1	3857	4	25617	0.4794
GO:0071323	cellular response to chitin	biological_process	8	TRINITY_DN100271_c0_g3	1	3857	4	25617	0.4794
GO:0035252	UDP-xylosyltransferase activity	molecular_function	7	TRINITY_DN107741_c0_g1	1	3857	4	25617	0.4794
GO:0016616	oxidoreductase activity, acting on the CH-OH group of donors, NAD or NADP as acceptor	molecular_function	6	TRINITY_DN117715_c0_g3	1	3857	4	25617	0.4794
GO:0004392	heme oxygenase (decyclizing) activity	molecular_function	6	TRINITY_DN116249_c1_g1	1	3857	4	25617	0.4794
GO:0004656	procollagen-proline 4-dioxygenase activity	molecular_function	9	TRINITY_DN111757_c2_g1	1	3857	4	25617	0.4794
GO:0031929	TOR signaling	biological_process	6	TRINITY_DN123954_c1_g1	1	3857	4	25617	0.4794
GO:0030445	yeast-form cell wall	cellular_component	7	TRINITY_DN119360_c2_g2	1	3857	4	25617	0.4794
GO:0019358	nicotinate nucleotide salvage	biological_process	10	TRINITY_DN98120_c0_g2	1	3857	4	25617	0.4794
GO:0034243	regulation of transcription elongation from RNA polymerase II promoter	biological_process	10	TRINITY_DN96407_c0_g5	1	3857	4	25617	0.4794
GO:0001736	establishment of planar polarity	biological_process	6	TRINITY_DN123937_c2_g1	1	3857	4	25617	0.4794
GO:0000781	chromosome, telomeric region	cellular_component	7	TRINITY_DN107279_c0_g1	1	3857	4	25617	0.4794
GO:0000188	inactivation of MAPK activity	biological_process	13	TRINITY_DN124048_c5_g1	1	3857	4	25617	0.4794
GO:1905499	trichome papilla formation	biological_process	7	TRINITY_DN117654_c0_g1	1	3857	4	25617	0.4794
GO:0006106	fumarate metabolic process	biological_process	9	TRINITY_DN103282_c1_g3	1	3857	4	25617	0.4794
GO:0008883	glutamyl-tRNA reductase activity	molecular_function	7	TRINITY_DN91142_c0_g1	1	3857	4	25617	0.4794
GO:0006513	protein monoubiquitination	biological_process	12	TRINITY_DN113708_c0_g1	1	3857	4	25617	0.4794
GO:0097255	R2TP complex	cellular_component	4	TRINITY_DN124281_c1_g1	1	3857	4	25617	0.4794
GO:0000812	Swr1 complex	cellular_component	8	TRINITY_DN124281_c1_g1	1	3857	4	25617	0.4794
GO:0033523	histone H2B ubiquitination	biological_process	13	TRINITY_DN113708_c0_g1	1	3857	4	25617	0.4794
GO:0045017	glycerolipid biosynthetic process	biological_process	7	TRINITY_DN93159_c0_g2	1	3857	4	25617	0.4794
GO:0080183	response to photooxidative stress	biological_process	6	TRINITY_DN111835_c1_g3	1	3857	4	25617	0.4794
GO:0001682	tRNA 5'-leader removal	biological_process	13	TRINITY_DN121625_c2_g1	1	3857	4	25617	0.4794
GO:0035312	5'-3' exodeoxyribonuclease activity	molecular_function	9	TRINITY_DN104413_c0_g2	1	3857	4	25617	0.4794
GO:0047746	chlorophyllase activity	molecular_function	7	TRINITY_DN116098_c5_g1	1	3857	4	25617	0.4794
GO:0043570	maintenance of DNA repeat elements	biological_process	8	TRINITY_DN123468_c5_g1	1	3857	4	25617	0.4794
GO:0031931	TORC1 complex	cellular_component	4	TRINITY_DN123954_c1_g1	1	3857	4	25617	0.4794
GO:0034063	stress granule assembly	biological_process	9	TRINITY_DN122327_c0_g1	1	3857	4	25617	0.4794
GO:0017057	6-phosphogluconolactonase activity	molecular_function	7	TRINITY_DN110921_c0_g1	1	3857	4	25617	0.4794
GO:0080151	positive regulation of salicylic acid mediated signaling pathway	biological_process	9	TRINITY_DN108414_c0_g1	1	3857	4	25617	0.4794
GO:0048575	short-day photoperiodism, flowering	biological_process	9	TRINITY_DN94973_c0_g1	1	3857	4	25617	0.4794
GO:0080153	negative regulation of reductive pentose-phosphate cycle	biological_process	8	TRINITY_DN88770_c0_g1	1	3857	4	25617	0.4794
GO:0005093	Rab GDP-dissociation inhibitor activity	molecular_function	8	TRINITY_DN111025_c0_g1	1	3857	4	25617	0.4794
GO:0048870	cell motility	biological_process	5	TRINITY_DN117403_c0_g1	1	3857	4	25617	0.4794
GO:0032050	clathrin heavy chain binding	molecular_function	6	TRINITY_DN116353_c0_g1	1	3857	4	25617	0.4794
GO:1900864	mitochondrial RNA modification	biological_process	10	TRINITY_DN111452_c0_g1	1	3857	4	25617	0.4794
GO:0003938	IMP dehydrogenase activity	molecular_function	7	TRINITY_DN113018_c1_g1	1	3857	4	25617	0.4794
GO:0010424	DNA methylation on cytosine within a CG sequence	biological_process	12	TRINITY_DN115189_c2_g1	1	3857	4	25617	0.4794
GO:0070816	phosphorylation of RNA polymerase II C-terminal domain	biological_process	10	TRINITY_DN115437_c0_g1	1	3857	4	25617	0.4794
GO:0016655	oxidoreductase activity, acting on NAD(P)H, quinone or similar compound as acceptor	molecular_function	6	TRINITY_DN94866_c1_g1	1	3857	4	25617	0.4794
GO:0031361	integral component of thylakoid membrane	cellular_component	6	TRINITY_DN96023_c0_g1	1	3857	4	25617	0.4794
GO:0019154	glycolate dehydrogenase activity	molecular_function	6	TRINITY_DN120121_c2_g1	1	3857	4	25617	0.4794
GO:0004709	MAP kinase kinase kinase activity	molecular_function	9	TRINITY_DN96330_c1_g1	1	3857	4	25617	0.4794
GO:0006427	histidyl-tRNA aminoacylation	biological_process	13	TRINITY_DN123872_c3_g2	1	3857	4	25617	0.4794
GO:0009277	fungal-type cell wall	cellular_component	6	TRINITY_DN98056_c1_g1	1	3857	4	25617	0.4794
GO:0090306	spindle assembly involved in meiosis	biological_process	10	TRINITY_DN94521_c1_g1	1	3857	4	25617	0.4794
GO:0038199	ethylene receptor activity	molecular_function	5	TRINITY_DN108191_c3_g2	1	3857	4	25617	0.4794
GO:0018478	malonate-semialdehyde dehydrogenase (acetylating) activity	molecular_function	7	TRINITY_DN113353_c1_g1	1	3857	4	25617	0.4794
GO:0004828	serine-tRNA ligase activity	molecular_function	7	TRINITY_DN94367_c0_g2	1	3857	4	25617	0.4794
GO:0009609	response to symbiotic bacterium	biological_process	8	TRINITY_DN123853_c6_g2	1	3857	4	25617	0.4794
GO:0016992	lipoate synthase activity	molecular_function	7	TRINITY_DN106345_c0_g1	1	3857	4	25617	0.4794
GO:1901698	response to nitrogen compound	biological_process	5	TRINITY_DN117316_c1_g1	1	3857	4	25617	0.4794
GO:1990298	bub1-bub3 complex	cellular_component	4	TRINITY_DN114435_c1_g2	1	3857	4	25617	0.4794
GO:0071617	lysophospholipid acyltransferase activity	molecular_function	7	TRINITY_DN93159_c0_g2	1	3857	4	25617	0.4794
GO:0009517	PSII associated light-harvesting complex II	cellular_component	6	TRINITY_DN115898_c1_g1	1	3857	4	25617	0.4794
GO:0009399	nitrogen fixation	biological_process	6	TRINITY_DN88650_c0_g1	1	3857	4	25617	0.4794
GO:0005797	Golgi medial cisterna	cellular_component	8	TRINITY_DN102116_c1_g1	1	3857	4	25617	0.4794
GO:1901601	strigolactone biosynthetic process	biological_process	11	TRINITY_DN114509_c0_g1	1	3857	4	25617	0.4794
GO:0032301	MutSalpha complex	cellular_component	6	TRINITY_DN123468_c5_g1	1	3857	4	25617	0.4794
GO:0006007	glucose catabolic process	biological_process	9	TRINITY_DN121689_c0_g3	1	3857	4	25617	0.4794
GO:0006788	heme oxidation	biological_process	9	TRINITY_DN116249_c1_g1	1	3857	4	25617	0.4794
GO:0007219	Notch signaling pathway	biological_process	6	TRINITY_DN119391_c1_g3	1	3857	4	25617	0.4794
GO:0051596	methylglyoxal catabolic process	biological_process	7	TRINITY_DN120121_c2_g1	1	3857	4	25617	0.4794
GO:0043001	Golgi to plasma membrane protein transport	biological_process	10	TRINITY_DN110261_c1_g5	1	3857	4	25617	0.4794
GO:0031957	very long-chain fatty acid-CoA ligase activity	molecular_function	8	TRINITY_DN107936_c1_g1	1	3857	4	25617	0.4794
GO:0009821	alkaloid biosynthetic process	biological_process	7	TRINITY_DN117335_c2_g1	1	3857	4	25617	0.4794
GO:0010336	gibberellic acid homeostasis	biological_process	9	TRINITY_DN95505_c0_g1	1	3857	4	25617	0.4794
GO:0033014	tetrapyrrole biosynthetic process	biological_process	7	TRINITY_DN114074_c0_g1	1	3857	4	25617	0.4794
GO:0043487	regulation of RNA stability	biological_process	9	TRINITY_DN94521_c1_g1	1	3857	4	25617	0.4794
GO:0002376	immune system process	biological_process	3	TRINITY_DN121978_c0_g1	1	3857	4	25617	0.4794
GO:0004821	histidine-tRNA ligase activity	molecular_function	7	TRINITY_DN123872_c3_g2	1	3857	4	25617	0.4794
GO:0002183	cytoplasmic translational initiation	biological_process	6	TRINITY_DN102686_c0_g1	1	3857	4	25617	0.4794
GO:0004108	citrate (Si)-synthase activity	molecular_function	8	TRINITY_DN100706_c2_g1	1	3857	4	25617	0.4794
GO:0005674	transcription factor TFIIF complex	cellular_component	7	TRINITY_DN102159_c0_g3	1	3857	4	25617	0.4794
GO:2000904	regulation of starch metabolic process	biological_process	9	TRINITY_DN104950_c0_g1	1	3857	4	25617	0.4794
GO:1990136	linoleate 9S-lipoxygenase activity	molecular_function	7	TRINITY_DN100401_c0_g1	1	3857	4	25617	0.4794
GO:0000453	enzyme-directed rRNA 2'-O-methylation	biological_process	15	TRINITY_DN122591_c1_g1	1	3857	4	25617	0.4794
GO:0008649	rRNA methyltransferase activity	molecular_function	8	TRINITY_DN105313_c0_g1	1	3857	4	25617	0.4794
GO:0010793	regulation of mRNA export from nucleus	biological_process	8	TRINITY_DN120724_c1_g1	1	3857	4	25617	0.4794
GO:0050830	defense response to Gram-positive bacterium	biological_process	9	TRINITY_DN114418_c1_g2	1	3857	4	25617	0.4794
GO:0006564	L-serine biosynthetic process	biological_process	12	TRINITY_DN97625_c1_g3	1	3857	4	25617	0.4794
GO:0030307	positive regulation of cell growth	biological_process	7	TRINITY_DN123954_c1_g1	1	3857	4	25617	0.4794
GO:0006754	ATP biosynthetic process	biological_process	12	TRINITY_DN90610_c0_g1	1	3857	4	25617	0.4794
GO:0080024	indolebutyric acid metabolic process	biological_process	6	TRINITY_DN119528_c1_g1	1	3857	4	25617	0.4794
GO:0004056	argininosuccinate lyase activity	molecular_function	7	TRINITY_DN90953_c0_g3	1	3857	4	25617	0.4794
GO:0005828	kinetochore microtubule	cellular_component	9	TRINITY_DN114435_c1_g2	1	3857	4	25617	0.4794
GO:0043036	starch grain	cellular_component	7	TRINITY_DN104950_c0_g1	1	3857	4	25617	0.4794
GO:0044613	nuclear pore central transport channel	cellular_component	4	TRINITY_DN120947_c1_g1	1	3857	4	25617	0.4794
GO:0044375	regulation of peroxisome size	biological_process	6	TRINITY_DN95999_c0_g1	1	3857	4	25617	0.4794
GO:0001729	ceramide kinase activity	molecular_function	8	TRINITY_DN110146_c0_g4	1	3857	4	25617	0.4794
GO:0071454	cellular response to anoxia	biological_process	6	TRINITY_DN88770_c0_g1	1	3857	4	25617	0.4794
GO:0051740	ethylene binding	molecular_function	5	TRINITY_DN108191_c3_g2	1	3857	4	25617	0.4794
GO:0006542	glutamine biosynthetic process	biological_process	12	TRINITY_DN88650_c0_g1	1	3857	4	25617	0.4794
GO:1900386	positive regulation of flavonol biosynthetic process	biological_process	9	TRINITY_DN97000_c0_g1	1	3857	4	25617	0.4794
GO:0010258	NADH dehydrogenase complex (plastoquinone) assembly	biological_process	9	TRINITY_DN94866_c1_g1	1	3857	4	25617	0.4794
GO:0003852	2-isopropylmalate synthase activity	molecular_function	7	TRINITY_DN91588_c1_g3	1	3857	4	25617	0.4794
GO:0008720	D-lactate dehydrogenase activity	molecular_function	7	TRINITY_DN120121_c2_g1	1	3857	4	25617	0.4794
GO:0010366	negative regulation of ethylene biosynthetic process	biological_process	11	TRINITY_DN119713_c0_g1	1	3857	4	25617	0.4794
GO:0009107	lipoate biosynthetic process	biological_process	11	TRINITY_DN106345_c0_g1	1	3857	4	25617	0.4794
GO:0042134	rRNA primary transcript binding	molecular_function	8	TRINITY_DN112673_c0_g3	1	3857	4	25617	0.4794
GO:0004333	fumarate hydratase activity	molecular_function	7	TRINITY_DN103282_c1_g3	1	3857	4	25617	0.4794
GO:0042175	nuclear outer membrane-endoplasmic reticulum membrane network	cellular_component	4	TRINITY_DN119178_c0_g2	1	3857	4	25617	0.4794
GO:0010603	regulation of cytoplasmic mRNA processing body assembly	biological_process	7	TRINITY_DN122327_c0_g1	1	3857	4	25617	0.4794
GO:0017017	MAP kinase tyrosine/serine/threonine phosphatase activity	molecular_function	10	TRINITY_DN124048_c5_g1	1	3857	4	25617	0.4794
GO:0071494	cellular response to UV-C	biological_process	9	TRINITY_DN116249_c1_g1	1	3857	4	25617	0.4794
GO:0032137	guanine/thymine mispair binding	molecular_function	9	TRINITY_DN123468_c5_g1	1	3857	4	25617	0.4794
GO:0010179	IAA-Ala conjugate hydrolase activity	molecular_function	7	TRINITY_DN112080_c1_g1	1	3857	4	25617	0.4794
GO:0033588	Elongator holoenzyme complex	cellular_component	4	TRINITY_DN120568_c0_g1	1	3857	4	25617	0.4794
GO:0071486	cellular response to high light intensity	biological_process	9	TRINITY_DN90943_c0_g1	1	3857	4	25617	0.4794
GO:0019788	NEDD8 transferase activity	molecular_function	6	TRINITY_DN101581_c1_g1	1	3857	4	25617	0.4794
GO:0004347	glucose-6-phosphate isomerase activity	molecular_function	7	TRINITY_DN119685_c1_g3	1	3857	4	25617	0.4794
GO:0000077	DNA damage checkpoint	biological_process	7	TRINITY_DN98489_c1_g1	1	3857	4	25617	0.4794
GO:0008442	3-hydroxyisobutyrate dehydrogenase activity	molecular_function	7	TRINITY_DN107213_c2_g1	1	3857	4	25617	0.4794
GO:0051511	negative regulation of unidimensional cell growth	biological_process	8	TRINITY_DN99797_c3_g1	1	3857	4	25617	0.4794
GO:0045786	negative regulation of cell cycle	biological_process	7	TRINITY_DN98340_c1_g2	1	3857	4	25617	0.4794
GO:0006419	alanyl-tRNA aminoacylation	biological_process	13	TRINITY_DN121688_c0_g1	1	3857	4	25617	0.4794
GO:0006434	seryl-tRNA aminoacylation	biological_process	13	TRINITY_DN94367_c0_g2	1	3857	4	25617	0.4794
GO:0010542	nitrate efflux transmembrane transporter activity	molecular_function	10	TRINITY_DN108670_c1_g1	1	3857	4	25617	0.4794
GO:0031935	regulation of chromatin silencing	biological_process	9	TRINITY_DN122252_c2_g4	1	3857	4	25617	0.4794
GO:0050521	alpha-glucan, water dikinase activity	molecular_function	7	TRINITY_DN90506_c1_g1	1	3857	4	25617	0.4794
GO:0000303	response to superoxide	biological_process	8	TRINITY_DN120688_c0_g1	1	3857	4	25617	0.4794
GO:0009898	cytoplasmic side of plasma membrane	cellular_component	5	TRINITY_DN93396_c3_g2	1	3857	4	25617	0.4794
GO:0102773	dihydroceramide kinase activity	molecular_function	7	TRINITY_DN110146_c0_g4	1	3857	4	25617	0.4794
GO:0048317	seed morphogenesis	biological_process	5	TRINITY_DN116198_c0_g1	1	3857	4	25617	0.4794
GO:0030551	cyclic nucleotide binding	molecular_function	6	TRINITY_DN120291_c1_g2	1	3857	4	25617	0.4794
GO:0019897	extrinsic component of plasma membrane	cellular_component	5	TRINITY_DN115110_c1_g1	1	3857	4	25617	0.4794
GO:0004475	mannose-1-phosphate guanylyltransferase activity	molecular_function	9	TRINITY_DN123851_c2_g4	1	3857	4	25617	0.4794
GO:1900865	chloroplast RNA modification	biological_process	10	TRINITY_DN111452_c0_g1	1	3857	4	25617	0.4794
GO:0048572	short-day photoperiodism	biological_process	8	TRINITY_DN94973_c0_g1	1	3857	4	25617	0.4794
GO:0004813	alanine-tRNA ligase activity	molecular_function	7	TRINITY_DN121688_c0_g1	1	3857	4	25617	0.4794
GO:0060271	cilium assembly	biological_process	7	TRINITY_DN112596_c0_g2	1	3857	4	25617	0.4794
GO:0004491	methylmalonate-semialdehyde dehydrogenase (acylating) activity	molecular_function	7	TRINITY_DN113353_c1_g1	1	3857	4	25617	0.4794
GO:0006353	DNA-templated transcription, termination	biological_process	8	TRINITY_DN115584_c0_g1	1	3857	4	25617	0.4794
GO:0005697	telomerase holoenzyme complex	cellular_component	6	TRINITY_DN94521_c1_g1	1	3857	4	25617	0.4794
GO:0080026	response to indolebutyric acid	biological_process	6	TRINITY_DN119528_c1_g1	1	3857	4	25617	0.4794
GO:0015292	uniporter activity	molecular_function	7	TRINITY_DN111687_c0_g1	1	3857	4	25617	0.4794
GO:0102293	pheophytinase b activity	molecular_function	7	TRINITY_DN116098_c5_g1	1	3857	4	25617	0.4794
GO:0032138	single base insertion or deletion binding	molecular_function	10	TRINITY_DN123468_c5_g1	1	3857	4	25617	0.4794
GO:0005516	calmodulin binding	molecular_function	5	TRINITY_DN101324_c1_g1;TRINITY_DN106197_c0_g1;TRINITY_DN106894_c2_g1;TRINITY_DN107568_c0_g1;TRINITY_DN108510_c1_g2;TRINITY_DN108956_c0_g1;TRINITY_DN110436_c0_g2;TRINITY_DN110739_c3_g2;TRINITY_DN111594_c0_g2;TRINITY_DN111659_c0_g1;TRINITY_DN112485_c1_g1;TRINITY_DN113248_c0_g1;TRINITY_DN114957_c0_g5;TRINITY_DN115457_c1_g2;TRINITY_DN116672_c1_g1;TRINITY_DN118708_c0_g1;TRINITY_DN119360_c2_g2;TRINITY_…	30	3857	195	25617	0.479559
GO:0003779	actin binding	molecular_function	6	TRINITY_DN112183_c0_g3;TRINITY_DN114323_c1_g4;TRINITY_DN114913_c0_g2;TRINITY_DN116198_c0_g1;TRINITY_DN120923_c1_g1;TRINITY_DN121816_c2_g1;TRINITY_DN122170_c1_g1;TRINITY_DN122745_c3_g3;TRINITY_DN93603_c0_g1;TRINITY_DN98963_c1_g1	10	3857	63	25617	0.481439
GO:0010118	stomatal movement	biological_process	4	TRINITY_DN104253_c2_g1;TRINITY_DN114159_c1_g1;TRINITY_DN114159_c1_g2;TRINITY_DN119970_c1_g3;TRINITY_DN120337_c1_g2;TRINITY_DN121689_c0_g3;TRINITY_DN122821_c1_g2;TRINITY_DN122914_c1_g4;TRINITY_DN123532_c4_g2;TRINITY_DN98206_c0_g2	10	3857	63	25617	0.481439
GO:0008284	positive regulation of cell proliferation	biological_process	7	TRINITY_DN109538_c0_g1;TRINITY_DN111589_c0_g1;TRINITY_DN94340_c4_g2	3	3857	17	25617	0.482938
GO:0005655	nucleolar ribonuclease P complex	cellular_component	9	TRINITY_DN100840_c2_g1;TRINITY_DN102457_c0_g2;TRINITY_DN107403_c1_g1	3	3857	17	25617	0.482938
GO:0009082	branched-chain amino acid biosynthetic process	biological_process	10	TRINITY_DN117426_c3_g1;TRINITY_DN118737_c0_g1;TRINITY_DN122099_c3_g2	3	3857	17	25617	0.482938
GO:2000022	regulation of jasmonic acid mediated signaling pathway	biological_process	8	TRINITY_DN108414_c0_g1;TRINITY_DN119311_c1_g2;TRINITY_DN98206_c0_g2	3	3857	17	25617	0.482938
GO:0006400	tRNA modification	biological_process	12	TRINITY_DN104558_c0_g1;TRINITY_DN119640_c3_g3;TRINITY_DN121688_c0_g1	3	3857	17	25617	0.482938
GO:0004812	aminoacyl-tRNA ligase activity	molecular_function	6	TRINITY_DN114452_c0_g2;TRINITY_DN119788_c0_g2;TRINITY_DN124702_c0_g1	3	3857	17	25617	0.482938
GO:0008361	regulation of cell size	biological_process	6	TRINITY_DN101005_c0_g3;TRINITY_DN111099_c0_g2;TRINITY_DN123954_c1_g1	3	3857	17	25617	0.482938
GO:0000036	acyl carrier activity	molecular_function	7	TRINITY_DN100463_c0_g1;TRINITY_DN110998_c0_g2;TRINITY_DN99076_c2_g1	3	3857	17	25617	0.482938
GO:0000285	1-phosphatidylinositol-3-phosphate 5-kinase activity	molecular_function	8	TRINITY_DN100807_c0_g1;TRINITY_DN104005_c3_g1;TRINITY_DN125057_c2_g2	3	3857	17	25617	0.482938
GO:0000993	RNA polymerase II core binding	molecular_function	7	TRINITY_DN100731_c0_g1;TRINITY_DN100731_c0_g2;TRINITY_DN96429_c3_g1	3	3857	17	25617	0.482938
GO:0016571	histone methylation	biological_process	11	TRINITY_DN109559_c1_g1;TRINITY_DN122543_c2_g1;TRINITY_DN95751_c0_g1	3	3857	17	25617	0.482938
GO:0044030	regulation of DNA methylation	biological_process	9	TRINITY_DN116316_c0_g1;TRINITY_DN116316_c1_g6;TRINITY_DN119391_c1_g3	3	3857	17	25617	0.482938
GO:0009523	photosystem II	cellular_component	7	TRINITY_DN111882_c0_g2;TRINITY_DN115898_c1_g1;TRINITY_DN90943_c0_g1	3	3857	17	25617	0.482938
GO:0010304	PSII associated light-harvesting complex II catabolic process	biological_process	9	TRINITY_DN102888_c0_g4;TRINITY_DN122205_c0_g1;TRINITY_DN99707_c0_g3	3	3857	17	25617	0.482938
GO:0004564	beta-fructofuranosidase activity	molecular_function	7	TRINITY_DN119654_c1_g1;TRINITY_DN123496_c2_g2;TRINITY_DN97534_c0_g1	3	3857	17	25617	0.482938
GO:0008198	ferrous iron binding	molecular_function	9	TRINITY_DN119693_c0_g3;TRINITY_DN120542_c1_g4;TRINITY_DN95312_c3_g1	3	3857	17	25617	0.482938
GO:0006807	nitrogen compound metabolic process	biological_process	4	TRINITY_DN101981_c0_g1;TRINITY_DN95235_c2_g4;TRINITY_DN98793_c0_g1	3	3857	17	25617	0.482938
GO:0016760	cellulose synthase (UDP-forming) activity	molecular_function	9	TRINITY_DN100202_c1_g1;TRINITY_DN103589_c1_g3;TRINITY_DN104260_c1_g3;TRINITY_DN107949_c0_g2;TRINITY_DN118188_c0_g1;TRINITY_DN118753_c0_g2;TRINITY_DN119045_c3_g3;TRINITY_DN119045_c3_g4;TRINITY_DN119045_c3_g5;TRINITY_DN120616_c2_g5;TRINITY_DN95683_c2_g2	11	3857	70	25617	0.489598
GO:0010105	negative regulation of ethylene-activated signaling pathway	biological_process	11	TRINITY_DN104456_c1_g2;TRINITY_DN108191_c3_g2;TRINITY_DN108414_c0_g1;TRINITY_DN124260_c9_g1;TRINITY_DN124260_c9_g2;TRINITY_DN124356_c0_g1	6	3857	37	25617	0.491137
GO:0005686	U2 snRNP	cellular_component	8	TRINITY_DN112955_c0_g1;TRINITY_DN124299_c2_g2;TRINITY_DN124342_c0_g1;TRINITY_DN88458_c0_g3;TRINITY_DN91459_c0_g3;TRINITY_DN98326_c0_g1	6	3857	37	25617	0.491137
GO:1902600	proton transmembrane transport	biological_process	9	TRINITY_DN106142_c1_g2;TRINITY_DN106671_c1_g2;TRINITY_DN111841_c0_g1;TRINITY_DN117245_c1_g4;TRINITY_DN123809_c2_g2;TRINITY_DN99053_c1_g1	6	3857	37	25617	0.491137
GO:0000712	resolution of meiotic recombination intermediates	biological_process	7	TRINITY_DN109659_c1_g1;TRINITY_DN122252_c2_g4;TRINITY_DN122961_c2_g2;TRINITY_DN94387_c1_g1	4	3857	24	25617	0.498304
GO:0009638	phototropism	biological_process	6	TRINITY_DN114078_c0_g1;TRINITY_DN114159_c1_g1;TRINITY_DN114159_c1_g2;TRINITY_DN122914_c1_g4	4	3857	24	25617	0.498304
GO:0008810	cellulase activity	molecular_function	7	TRINITY_DN102228_c0_g2;TRINITY_DN116935_c1_g1;TRINITY_DN119783_c3_g2;TRINITY_DN98368_c2_g1	4	3857	24	25617	0.498304
GO:0006955	immune response	biological_process	4	TRINITY_DN103575_c0_g1;TRINITY_DN115291_c0_g2;TRINITY_DN121604_c2_g1;TRINITY_DN88884_c0_g1	4	3857	24	25617	0.498304
GO:0030245	cellulose catabolic process	biological_process	11	TRINITY_DN102228_c0_g2;TRINITY_DN116935_c1_g1;TRINITY_DN119783_c3_g2;TRINITY_DN98368_c2_g1	4	3857	24	25617	0.498304
GO:0071011	precatalytic spliceosome	cellular_component	7	TRINITY_DN108048_c0_g2;TRINITY_DN117287_c0_g1;TRINITY_DN118641_c0_g1;TRINITY_DN88458_c0_g3;TRINITY_DN91459_c0_g3;TRINITY_DN96013_c1_g1;TRINITY_DN97845_c1_g1	7	3857	44	25617	0.501035
GO:0009556	microsporogenesis	biological_process	7	TRINITY_DN102495_c0_g2;TRINITY_DN109580_c1_g1;TRINITY_DN110904_c0_g2;TRINITY_DN112226_c0_g1;TRINITY_DN116388_c0_g2;TRINITY_DN120923_c1_g1;TRINITY_DN124672_c3_g1;TRINITY_DN124846_c5_g6	8	3857	51	25617	0.509473
GO:0006366	transcription by RNA polymerase II	biological_process	9	TRINITY_DN105877_c2_g1;TRINITY_DN112428_c2_g1;TRINITY_DN115778_c0_g2;TRINITY_DN116955_c3_g1;TRINITY_DN122799_c1_g1;TRINITY_DN123856_c6_g1;TRINITY_DN124027_c3_g1;TRINITY_DN96678_c0_g1	8	3857	51	25617	0.509473
GO:0042335	cuticle development	biological_process	5	TRINITY_DN102874_c0_g1;TRINITY_DN103442_c0_g1;TRINITY_DN110138_c0_g1;TRINITY_DN119067_c1_g1;TRINITY_DN90771_c0_g1	5	3857	31	25617	0.509558
GO:0006487	protein N-linked glycosylation	biological_process	10	TRINITY_DN102263_c4_g2;TRINITY_DN107409_c0_g1;TRINITY_DN114012_c0_g1;TRINITY_DN118729_c0_g2;TRINITY_DN118834_c1_g2	5	3857	31	25617	0.509558
GO:0051015	actin filament binding	molecular_function	7	TRINITY_DN103233_c0_g2;TRINITY_DN112183_c0_g3;TRINITY_DN114323_c1_g4;TRINITY_DN114913_c0_g2;TRINITY_DN114915_c0_g4;TRINITY_DN118302_c1_g1;TRINITY_DN119287_c0_g2;TRINITY_DN120923_c1_g1;TRINITY_DN125148_c7_g1;TRINITY_DN125148_c7_g2;TRINITY_DN98963_c1_g1	11	3857	71	25617	0.509635
GO:0003777	microtubule motor activity	molecular_function	10	TRINITY_DN104666_c0_g1;TRINITY_DN112242_c0_g5;TRINITY_DN117166_c1_g1;TRINITY_DN121817_c0_g1;TRINITY_DN122958_c2_g2;TRINITY_DN123763_c4_g1;TRINITY_DN124709_c2_g3;TRINITY_DN125018_c2_g1;TRINITY_DN125018_c2_g3;TRINITY_DN81628_c0_g1;TRINITY_DN93069_c2_g1	11	3857	71	25617	0.509635
GO:0009938	negative regulation of gibberellic acid mediated signaling pathway	biological_process	9	TRINITY_DN110710_c0_g1;TRINITY_DN121009_c0_g1	2	3857	11	25617	0.510005
GO:0009840	chloroplastic endopeptidase Clp complex	cellular_component	5	TRINITY_DN81848_c0_g1;TRINITY_DN94178_c0_g2	2	3857	11	25617	0.510005
GO:0034314	Arp2/3 complex-mediated actin nucleation	biological_process	8	TRINITY_DN121816_c2_g1;TRINITY_DN98963_c1_g1	2	3857	11	25617	0.510005
GO:0034485	phosphatidylinositol-3,4,5-trisphosphate 5-phosphatase activity	molecular_function	10	TRINITY_DN92964_c0_g2;TRINITY_DN99505_c5_g2	2	3857	11	25617	0.510005
GO:0000228	nuclear chromosome	cellular_component	7	TRINITY_DN123468_c5_g1;TRINITY_DN123625_c3_g1	2	3857	11	25617	0.510005
GO:0016279	protein-lysine N-methyltransferase activity	molecular_function	8	TRINITY_DN114057_c0_g1;TRINITY_DN121007_c0_g1	2	3857	11	25617	0.510005
GO:0015780	nucleotide-sugar transmembrane transport	biological_process	8	TRINITY_DN109233_c1_g4;TRINITY_DN120074_c1_g2	2	3857	11	25617	0.510005
GO:0048564	photosystem I assembly	biological_process	8	TRINITY_DN103222_c0_g2;TRINITY_DN89785_c0_g1	2	3857	11	25617	0.510005
GO:0043614	multi-eIF complex	cellular_component	6	TRINITY_DN107442_c0_g1;TRINITY_DN94437_c1_g1	2	3857	11	25617	0.510005
GO:1901002	positive regulation of response to salt stress	biological_process	7	TRINITY_DN112446_c0_g1;TRINITY_DN83315_c0_g1	2	3857	11	25617	0.510005
GO:0009226	nucleotide-sugar biosynthetic process	biological_process	9	TRINITY_DN112129_c0_g3;TRINITY_DN120069_c2_g3	2	3857	11	25617	0.510005
GO:0035250	UDP-galactosyltransferase activity	molecular_function	7	TRINITY_DN114697_c0_g1;TRINITY_DN122923_c2_g2	2	3857	11	25617	0.510005
GO:0004069	L-aspartate:2-oxoglutarate aminotransferase activity	molecular_function	7	TRINITY_DN92983_c2_g2;TRINITY_DN95235_c2_g4	2	3857	11	25617	0.510005
GO:0005885	Arp2/3 protein complex	cellular_component	4	TRINITY_DN121816_c2_g1;TRINITY_DN98963_c1_g1	2	3857	11	25617	0.510005
GO:0040029	regulation of gene expression, epigenetic	biological_process	8	TRINITY_DN113965_c0_g1;TRINITY_DN124388_c5_g2	2	3857	11	25617	0.510005
GO:0012507	ER to Golgi transport vesicle membrane	cellular_component	8	TRINITY_DN103999_c2_g1;TRINITY_DN123561_c3_g3	2	3857	11	25617	0.510005
GO:0019676	ammonia assimilation cycle	biological_process	12	TRINITY_DN123289_c0_g1;TRINITY_DN124145_c0_g1	2	3857	11	25617	0.510005
GO:0006779	porphyrin-containing compound biosynthetic process	biological_process	8	TRINITY_DN121043_c0_g3;TRINITY_DN91142_c0_g1	2	3857	11	25617	0.510005
[truncated: 1,281 more rows]

## Sheet: root
GO_ID	GO_Term	GO_function	GO_class	Genes	S gene number	TS gene number	B gene number	TB gene number	pvalue
GO:0005634	nucleus	cellular_component	6	TRINITY_DN100001_c0_g2;TRINITY_DN100065_c0_g1;TRINITY_DN100075_c1_g1;TRINITY_DN100076_c0_g1;TRINITY_DN100153_c1_g5;TRINITY_DN100282_c0_g2;TRINITY_DN100374_c0_g1;TRINITY_DN100382_c0_g1;TRINITY_DN100384_c5_g1;TRINITY_DN100407_c0_g1;TRINITY_DN100468_c1_g2;TRINITY_DN100473_c0_g2;TRINITY_DN100512_c0_g1;TRINITY_DN100517_c0_g1;TRINITY_DN100531_c0_g3;TRINITY_DN100540_c4_g4;TRINITY_DN100546_c0_g1;TRINITY_…	1756	5154	7059	25617	0
GO:0003677	DNA binding	molecular_function	6	TRINITY_DN100075_c1_g1;TRINITY_DN100153_c1_g5;TRINITY_DN100342_c2_g1;TRINITY_DN100374_c0_g1;TRINITY_DN100407_c0_g1;TRINITY_DN100473_c0_g2;TRINITY_DN100608_c0_g1;TRINITY_DN100813_c0_g1;TRINITY_DN100873_c2_g2;TRINITY_DN101075_c2_g1;TRINITY_DN101115_c1_g1;TRINITY_DN101137_c1_g1;TRINITY_DN101177_c0_g4;TRINITY_DN101261_c1_g1;TRINITY_DN101333_c0_g5;TRINITY_DN101553_c1_g3;TRINITY_DN101653_c2_g1;TRINITY_…	392	5154	1342	25617	5.55112e-16
GO:0006355	regulation of transcription, DNA-templated	biological_process	8	TRINITY_DN100075_c1_g1;TRINITY_DN100153_c1_g5;TRINITY_DN100374_c0_g1;TRINITY_DN100407_c0_g1;TRINITY_DN100473_c0_g2;TRINITY_DN100512_c0_g1;TRINITY_DN100540_c4_g4;TRINITY_DN100585_c3_g2;TRINITY_DN100608_c0_g1;TRINITY_DN100620_c0_g1;TRINITY_DN100652_c0_g1;TRINITY_DN100797_c0_g1;TRINITY_DN100813_c0_g1;TRINITY_DN100957_c0_g2;TRINITY_DN101075_c2_g1;TRINITY_DN101115_c1_g1;TRINITY_DN101137_c1_g1;TRINITY_…	411	5154	1497	25617	1.23102e-12
GO:0006351	transcription, DNA-templated	biological_process	8	TRINITY_DN100075_c1_g1;TRINITY_DN100153_c1_g5;TRINITY_DN100374_c0_g1;TRINITY_DN100407_c0_g1;TRINITY_DN100473_c0_g2;TRINITY_DN100540_c4_g4;TRINITY_DN100608_c0_g1;TRINITY_DN100813_c0_g1;TRINITY_DN101075_c2_g1;TRINITY_DN101115_c1_g1;TRINITY_DN101261_c1_g1;TRINITY_DN101333_c0_g5;TRINITY_DN101545_c1_g1;TRINITY_DN101653_c2_g1;TRINITY_DN101653_c2_g2;TRINITY_DN101788_c2_g1;TRINITY_DN101862_c0_g1;TRINITY_…	344	5154	1219	25617	2.39564e-12
GO:0003700	DNA binding transcription factor activity	molecular_function	4	TRINITY_DN100153_c1_g5;TRINITY_DN100374_c0_g1;TRINITY_DN100407_c0_g1;TRINITY_DN100473_c0_g2;TRINITY_DN100512_c0_g1;TRINITY_DN100585_c3_g2;TRINITY_DN100608_c0_g1;TRINITY_DN100620_c0_g1;TRINITY_DN100652_c0_g1;TRINITY_DN101075_c2_g1;TRINITY_DN101115_c1_g1;TRINITY_DN101261_c1_g1;TRINITY_DN101333_c0_g5;TRINITY_DN101545_c1_g1;TRINITY_DN101566_c1_g5;TRINITY_DN101653_c2_g1;TRINITY_DN101653_c2_g2;TRINITY_…	325	5154	1162	25617	3.16508e-11
GO:0003729	mRNA binding	molecular_function	7	TRINITY_DN100436_c0_g3;TRINITY_DN101261_c2_g1;TRINITY_DN101360_c0_g2;TRINITY_DN101418_c1_g2;TRINITY_DN102942_c0_g1;TRINITY_DN103259_c0_g4;TRINITY_DN103479_c0_g1;TRINITY_DN103580_c0_g1;TRINITY_DN103699_c2_g1;TRINITY_DN104030_c2_g2;TRINITY_DN104442_c2_g2;TRINITY_DN104655_c1_g1;TRINITY_DN104741_c0_g1;TRINITY_DN104795_c0_g1;TRINITY_DN104959_c0_g1;TRINITY_DN105123_c3_g1;TRINITY_DN105201_c3_g2;TRINITY_…	143	5154	440	25617	5.02304e-10
GO:0005515	protein binding	molecular_function	4	TRINITY_DN100076_c0_g1;TRINITY_DN100191_c1_g1;TRINITY_DN100374_c0_g1;TRINITY_DN100512_c0_g1;TRINITY_DN100515_c0_g4;TRINITY_DN100531_c0_g3;TRINITY_DN100540_c4_g4;TRINITY_DN100585_c3_g2;TRINITY_DN100648_c0_g1;TRINITY_DN100657_c3_g4;TRINITY_DN100711_c2_g1;TRINITY_DN100722_c0_g1;TRINITY_DN100731_c0_g2;TRINITY_DN100797_c0_g1;TRINITY_DN100873_c2_g1;TRINITY_DN100873_c2_g2;TRINITY_DN100954_c1_g1;TRINITY_…	730	5154	3084	25617	1.42049e-07
GO:0005730	nucleolus	cellular_component	6	TRINITY_DN100540_c4_g4;TRINITY_DN101384_c0_g1;TRINITY_DN101877_c3_g1;TRINITY_DN101993_c0_g3;TRINITY_DN102026_c0_g1;TRINITY_DN102050_c0_g1;TRINITY_DN102392_c1_g1;TRINITY_DN102740_c0_g1;TRINITY_DN103241_c0_g2;TRINITY_DN103659_c0_g1;TRINITY_DN103980_c0_g2;TRINITY_DN104098_c0_g1;TRINITY_DN105038_c0_g2;TRINITY_DN105094_c1_g2;TRINITY_DN105959_c2_g6;TRINITY_DN106777_c0_g6;TRINITY_DN106945_c0_g1;TRINITY_…	136	5154	451	25617	2.15602e-07
GO:0043565	sequence-specific DNA binding	molecular_function	7	TRINITY_DN100374_c0_g1;TRINITY_DN100473_c0_g2;TRINITY_DN100512_c0_g1;TRINITY_DN100620_c0_g1;TRINITY_DN100652_c0_g1;TRINITY_DN100813_c0_g1;TRINITY_DN101261_c1_g1;TRINITY_DN101545_c1_g1;TRINITY_DN101653_c2_g1;TRINITY_DN101653_c2_g2;TRINITY_DN101788_c2_g1;TRINITY_DN101864_c0_g3;TRINITY_DN101877_c3_g1;TRINITY_DN102239_c0_g1;TRINITY_DN102335_c0_g2;TRINITY_DN102355_c0_g2;TRINITY_DN102392_c1_g1;TRINITY_…	154	5154	538	25617	1.18605e-06
GO:0005829	cytosol	cellular_component	6	TRINITY_DN100135_c4_g2;TRINITY_DN100229_c2_g2;TRINITY_DN100260_c0_g1;TRINITY_DN100376_c0_g1;TRINITY_DN100380_c2_g1;TRINITY_DN100472_c1_g1;TRINITY_DN100536_c0_g1;TRINITY_DN100540_c4_g4;TRINITY_DN100579_c2_g1;TRINITY_DN100712_c0_g1;TRINITY_DN100797_c0_g1;TRINITY_DN100801_c0_g2;TRINITY_DN100816_c1_g3;TRINITY_DN100844_c0_g1;TRINITY_DN101005_c0_g3;TRINITY_DN101073_c3_g1;TRINITY_DN101261_c2_g1;TRINITY_…	744	5154	3200	25617	1.83029e-06
GO:0045892	negative regulation of transcription, DNA-templated	biological_process	9	TRINITY_DN101545_c1_g1;TRINITY_DN103954_c0_g2;TRINITY_DN104437_c4_g1;TRINITY_DN104530_c1_g2;TRINITY_DN105276_c0_g1;TRINITY_DN106197_c0_g1;TRINITY_DN107562_c0_g1;TRINITY_DN107597_c2_g1;TRINITY_DN108326_c0_g2;TRINITY_DN108727_c1_g1;TRINITY_DN108834_c1_g2;TRINITY_DN109153_c0_g3;TRINITY_DN109704_c2_g2;TRINITY_DN109955_c0_g1;TRINITY_DN110501_c5_g1;TRINITY_DN110654_c1_g2;TRINITY_DN111093_c1_g1;TRINITY_…	48	5154	130	25617	6.59764e-06
GO:0030687	preribosome, large subunit precursor	cellular_component	6	TRINITY_DN100051_c1_g5;TRINITY_DN102026_c0_g1;TRINITY_DN112483_c2_g1;TRINITY_DN112673_c0_g1;TRINITY_DN112673_c0_g3;TRINITY_DN112976_c2_g1;TRINITY_DN115917_c0_g1;TRINITY_DN115917_c0_g3;TRINITY_DN116894_c4_g1;TRINITY_DN117972_c0_g3;TRINITY_DN118502_c1_g1;TRINITY_DN122558_c1_g2;TRINITY_DN122618_c2_g1;TRINITY_DN91377_c2_g7;TRINITY_DN92388_c0_g2;TRINITY_DN92417_c0_g2;TRINITY_DN92899_c2_g1;TRINITY_DN93…	21	5154	42	25617	1.4659e-05
GO:0003723	RNA binding	molecular_function	6	TRINITY_DN100755_c0_g1;TRINITY_DN101261_c2_g1;TRINITY_DN101418_c1_g2;TRINITY_DN102050_c0_g1;TRINITY_DN102676_c0_g1;TRINITY_DN102733_c1_g2;TRINITY_DN102942_c0_g1;TRINITY_DN103402_c1_g1;TRINITY_DN103479_c0_g1;TRINITY_DN103947_c0_g1;TRINITY_DN104402_c2_g1;TRINITY_DN104402_c2_g2;TRINITY_DN104655_c1_g1;TRINITY_DN104959_c0_g1;TRINITY_DN105123_c3_g1;TRINITY_DN105201_c3_g2;TRINITY_DN105301_c0_g1;TRINITY_…	187	5154	710	25617	2.9279e-05
GO:0051082	unfolded protein binding	molecular_function	5	TRINITY_DN103107_c0_g1;TRINITY_DN104005_c3_g1;TRINITY_DN105038_c0_g2;TRINITY_DN105076_c1_g2;TRINITY_DN107405_c1_g1;TRINITY_DN107405_c3_g2;TRINITY_DN107567_c2_g1;TRINITY_DN107928_c1_g2;TRINITY_DN108160_c1_g2;TRINITY_DN108771_c1_g2;TRINITY_DN109038_c6_g1;TRINITY_DN109044_c0_g1;TRINITY_DN109436_c0_g1;TRINITY_DN109626_c0_g3;TRINITY_DN109963_c1_g1;TRINITY_DN110883_c0_g2;TRINITY_DN111166_c3_g1;TRINITY_…	54	5154	160	25617	3.62109e-05
GO:0006397	mRNA processing	biological_process	10	TRINITY_DN101350_c0_g1;TRINITY_DN101360_c0_g2;TRINITY_DN103479_c0_g1;TRINITY_DN104021_c0_g1;TRINITY_DN104030_c2_g2;TRINITY_DN104222_c0_g1;TRINITY_DN106332_c1_g4;TRINITY_DN107252_c0_g3;TRINITY_DN107339_c0_g1;TRINITY_DN108003_c0_g1;TRINITY_DN108019_c0_g1;TRINITY_DN108547_c0_g4;TRINITY_DN109082_c3_g2;TRINITY_DN109496_c0_g2;TRINITY_DN110885_c4_g1;TRINITY_DN110953_c0_g1;TRINITY_DN111089_c0_g4;TRINITY_…	53	5154	161	25617	8.98507e-05
GO:0048653	anther development	biological_process	5	TRINITY_DN105535_c0_g2;TRINITY_DN108813_c0_g2;TRINITY_DN115164_c0_g1;TRINITY_DN115164_c0_g2;TRINITY_DN121815_c1_g2;TRINITY_DN90574_c0_g1;TRINITY_DN93210_c2_g1;TRINITY_DN95128_c0_g1;TRINITY_DN97554_c0_g1	9	5154	13	25617	0.000173472
GO:0048437	floral organ development	biological_process	5	TRINITY_DN102013_c0_g4;TRINITY_DN102495_c0_g2;TRINITY_DN110904_c0_g2;TRINITY_DN115164_c0_g1;TRINITY_DN115164_c0_g2;TRINITY_DN121815_c1_g2;TRINITY_DN124846_c5_g6;TRINITY_DN93757_c3_g2;TRINITY_DN95128_c0_g1	9	5154	13	25617	0.000173472
GO:0009651	response to salt stress	biological_process	6	TRINITY_DN100135_c4_g2;TRINITY_DN100191_c1_g1;TRINITY_DN100759_c2_g2;TRINITY_DN101261_c2_g1;TRINITY_DN101297_c1_g2;TRINITY_DN101767_c1_g1;TRINITY_DN102267_c0_g1;TRINITY_DN102395_c1_g1;TRINITY_DN102900_c0_g1;TRINITY_DN103031_c0_g3;TRINITY_DN103031_c0_g4;TRINITY_DN103107_c0_g1;TRINITY_DN103417_c0_g1;TRINITY_DN104417_c0_g1;TRINITY_DN104655_c1_g1;TRINITY_DN105038_c0_g2;TRINITY_DN105301_c0_g1;TRINITY_…	134	5154	502	25617	0.000200437
GO:0006457	protein folding	biological_process	4	TRINITY_DN100172_c0_g2;TRINITY_DN100314_c1_g1;TRINITY_DN101750_c0_g1;TRINITY_DN102035_c1_g2;TRINITY_DN102144_c0_g2;TRINITY_DN102740_c0_g1;TRINITY_DN103107_c0_g1;TRINITY_DN103210_c0_g1;TRINITY_DN105038_c0_g2;TRINITY_DN106266_c0_g1;TRINITY_DN107360_c0_g1;TRINITY_DN107405_c1_g1;TRINITY_DN107405_c3_g2;TRINITY_DN107928_c1_g2;TRINITY_DN108160_c1_g2;TRINITY_DN108771_c1_g2;TRINITY_DN108774_c1_g1;TRINITY_…	102	5154	366	25617	0.000210672
GO:0003680	AT DNA binding	molecular_function	9	TRINITY_DN100433_c0_g1;TRINITY_DN101862_c0_g1;TRINITY_DN105405_c2_g1;TRINITY_DN110305_c6_g1;TRINITY_DN122830_c2_g1;TRINITY_DN122830_c2_g3;TRINITY_DN91304_c0_g1;TRINITY_DN91432_c2_g1;TRINITY_DN92526_c1_g1;TRINITY_DN94610_c1_g3;TRINITY_DN96978_c1_g1	11	5154	19	25617	0.0003251
GO:0000156	phosphorelay response regulator activity	molecular_function	4	TRINITY_DN101115_c1_g1;TRINITY_DN104043_c0_g1;TRINITY_DN105438_c0_g2;TRINITY_DN105890_c0_g1;TRINITY_DN108191_c3_g2;TRINITY_DN109153_c0_g3;TRINITY_DN109955_c0_g1;TRINITY_DN119458_c2_g4;TRINITY_DN121349_c0_g1;TRINITY_DN121401_c0_g3;TRINITY_DN88414_c0_g2;TRINITY_DN92666_c0_g1	12	5154	22	25617	0.000367731
GO:0003676	nucleic acid binding	molecular_function	5	TRINITY_DN101350_c0_g1;TRINITY_DN101711_c2_g1;TRINITY_DN102009_c0_g1;TRINITY_DN102251_c1_g1;TRINITY_DN103012_c0_g4;TRINITY_DN104402_c2_g1;TRINITY_DN104402_c2_g2;TRINITY_DN104795_c0_g1;TRINITY_DN105123_c3_g1;TRINITY_DN105241_c0_g1;TRINITY_DN106815_c1_g2;TRINITY_DN107279_c0_g1;TRINITY_DN107351_c1_g1;TRINITY_DN107378_c0_g1;TRINITY_DN107597_c2_g1;TRINITY_DN107774_c0_g1;TRINITY_DN107855_c1_g2;TRINITY_…	89	5154	317	25617	0.000394095
GO:0005516	calmodulin binding	molecular_function	5	TRINITY_DN101324_c1_g1;TRINITY_DN103465_c0_g1;TRINITY_DN104483_c1_g1;TRINITY_DN105059_c0_g1;TRINITY_DN105226_c1_g2;TRINITY_DN106197_c0_g1;TRINITY_DN107391_c4_g1;TRINITY_DN107568_c0_g1;TRINITY_DN107679_c2_g2;TRINITY_DN108218_c1_g2;TRINITY_DN108510_c1_g2;TRINITY_DN108956_c0_g1;TRINITY_DN110245_c0_g1;TRINITY_DN110436_c0_g2;TRINITY_DN110436_c1_g2;TRINITY_DN110739_c2_g1;TRINITY_DN111290_c0_g1;TRINITY_…	58	5154	195	25617	0.000855218
GO:0030154	cell differentiation	biological_process	5	TRINITY_DN100473_c0_g2;TRINITY_DN100540_c4_g4;TRINITY_DN100608_c0_g1;TRINITY_DN101653_c2_g1;TRINITY_DN101653_c2_g2;TRINITY_DN102239_c0_g1;TRINITY_DN102627_c0_g1;TRINITY_DN103276_c0_g1;TRINITY_DN103417_c0_g1;TRINITY_DN103452_c0_g2;TRINITY_DN103954_c0_g2;TRINITY_DN104163_c0_g1;TRINITY_DN104437_c4_g1;TRINITY_DN105012_c0_g1;TRINITY_DN106991_c0_g3;TRINITY_DN109327_c0_g1;TRINITY_DN109327_c0_g2;TRINITY_…	74	5154	261	25617	0.000857121
GO:0006997	nucleus organization	biological_process	6	TRINITY_DN102687_c0_g1;TRINITY_DN108579_c0_g2;TRINITY_DN116167_c0_g1;TRINITY_DN122532_c1_g2;TRINITY_DN123289_c2_g2;TRINITY_DN124189_c3_g1;TRINITY_DN93345_c0_g1	7	5154	10	25617	0.000895437
GO:0006265	DNA topological change	biological_process	8	TRINITY_DN109659_c1_g1;TRINITY_DN109659_c1_g2;TRINITY_DN109659_c1_g5;TRINITY_DN115578_c0_g1;TRINITY_DN115578_c0_g2;TRINITY_DN116379_c0_g2;TRINITY_DN116997_c5_g1;TRINITY_DN117495_c0_g3;TRINITY_DN118401_c0_g2;TRINITY_DN122961_c2_g2;TRINITY_DN124617_c4_g1;TRINITY_DN91138_c0_g4;TRINITY_DN98710_c1_g1	13	5154	27	25617	0.00100224
GO:0009736	cytokinin-activated signaling pathway	biological_process	6	TRINITY_DN100382_c0_g1;TRINITY_DN101115_c1_g1;TRINITY_DN101222_c0_g1;TRINITY_DN104043_c0_g1;TRINITY_DN104892_c0_g1;TRINITY_DN105438_c0_g2;TRINITY_DN107445_c0_g1;TRINITY_DN115823_c0_g1;TRINITY_DN116788_c3_g1;TRINITY_DN118474_c1_g1;TRINITY_DN120959_c0_g2;TRINITY_DN121009_c0_g1;TRINITY_DN121902_c2_g1;TRINITY_DN123937_c2_g1;TRINITY_DN124710_c4_g1;TRINITY_DN88092_c0_g1;TRINITY_DN88414_c0_g2;TRINITY_DN…	19	5154	47	25617	0.00113691
GO:0000398	mRNA splicing, via spliceosome	biological_process	13	TRINITY_DN100504_c0_g2;TRINITY_DN100755_c0_g1;TRINITY_DN101977_c0_g4;TRINITY_DN102733_c1_g2;TRINITY_DN102942_c0_g1;TRINITY_DN103947_c0_g1;TRINITY_DN107453_c1_g1;TRINITY_DN108008_c3_g2;TRINITY_DN108783_c1_g1;TRINITY_DN109218_c0_g1;TRINITY_DN109749_c0_g4;TRINITY_DN110893_c4_g1;TRINITY_DN112647_c1_g2;TRINITY_DN113012_c0_g1;TRINITY_DN113725_c1_g1;TRINITY_DN114084_c1_g1;TRINITY_DN114084_c1_g2;TRINITY_…	42	5154	133	25617	0.00117566
GO:0010501	RNA secondary structure unwinding	biological_process	9	TRINITY_DN100548_c0_g5;TRINITY_DN100783_c0_g1;TRINITY_DN101261_c2_g1;TRINITY_DN102156_c0_g1;TRINITY_DN102156_c0_g2;TRINITY_DN103629_c0_g3;TRINITY_DN104527_c1_g1;TRINITY_DN104655_c1_g1;TRINITY_DN105869_c0_g1;TRINITY_DN106379_c0_g3;TRINITY_DN106483_c0_g1;TRINITY_DN109187_c2_g10;TRINITY_DN111513_c4_g1;TRINITY_DN112163_c0_g2;TRINITY_DN112399_c1_g1;TRINITY_DN112399_c2_g2;TRINITY_DN113025_c1_g1;TRINITY…	42	5154	135	25617	0.00162448
GO:0052694	jasmonoyl-isoleucine-12-hydroxylase activity	molecular_function	6	TRINITY_DN108813_c0_g1;TRINITY_DN108813_c0_g2;TRINITY_DN108813_c1_g1;TRINITY_DN96152_c1_g4	4	5154	4	25617	0.00163704
GO:0055063	sulfate ion homeostasis	biological_process	10	TRINITY_DN113240_c2_g1;TRINITY_DN113923_c0_g2;TRINITY_DN116316_c0_g1;TRINITY_DN116316_c1_g6	4	5154	4	25617	0.00163704
GO:0010228	vegetative to reproductive phase transition of meristem	biological_process	5	TRINITY_DN100731_c0_g2;TRINITY_DN101261_c2_g1;TRINITY_DN101862_c0_g1;TRINITY_DN104133_c0_g1;TRINITY_DN104655_c1_g1;TRINITY_DN104741_c0_g1;TRINITY_DN106157_c1_g1;TRINITY_DN106395_c0_g2;TRINITY_DN106945_c0_g1;TRINITY_DN107506_c1_g1;TRINITY_DN108240_c1_g5;TRINITY_DN110305_c6_g1;TRINITY_DN112647_c1_g2;TRINITY_DN113048_c2_g2;TRINITY_DN113708_c0_g1;TRINITY_DN118674_c2_g2;TRINITY_DN119119_c0_g1;TRINITY_…	31	5154	93	25617	0.00191237
GO:0000209	protein polyubiquitination	biological_process	12	TRINITY_DN100424_c0_g1;TRINITY_DN104133_c0_g1;TRINITY_DN104159_c0_g1;TRINITY_DN105832_c0_g1;TRINITY_DN107475_c0_g2;TRINITY_DN109449_c0_g2;TRINITY_DN111436_c0_g1;TRINITY_DN111532_c4_g1;TRINITY_DN112981_c0_g1;TRINITY_DN114086_c1_g2;TRINITY_DN114698_c2_g3;TRINITY_DN114720_c1_g1;TRINITY_DN117513_c0_g1;TRINITY_DN117620_c3_g1;TRINITY_DN118501_c0_g1;TRINITY_DN118501_c0_g3;TRINITY_DN118511_c2_g2;TRINITY_…	31	5154	93	25617	0.00191237
GO:0045087	innate immune response	biological_process	5	TRINITY_DN101261_c2_g1;TRINITY_DN104655_c1_g1;TRINITY_DN105405_c2_g1;TRINITY_DN107405_c3_g2;TRINITY_DN108003_c0_g1;TRINITY_DN109782_c2_g1;TRINITY_DN111089_c0_g4;TRINITY_DN113708_c0_g1;TRINITY_DN116752_c1_g2;TRINITY_DN118528_c0_g1;TRINITY_DN119916_c0_g1;TRINITY_DN121204_c3_g1;TRINITY_DN121621_c3_g4;TRINITY_DN122502_c2_g2;TRINITY_DN122765_c1_g1;TRINITY_DN123331_c1_g1;TRINITY_DN123331_c2_g5;TRINITY_…	24	5154	67	25617	0.00203175
GO:0051781	positive regulation of cell division	biological_process	7	TRINITY_DN108444_c1_g1;TRINITY_DN111669_c0_g2;TRINITY_DN112371_c0_g3;TRINITY_DN113393_c0_g1;TRINITY_DN113708_c0_g1;TRINITY_DN118461_c1_g5;TRINITY_DN120281_c1_g1	7	5154	11	25617	0.00203393
GO:0009965	leaf morphogenesis	biological_process	6	TRINITY_DN100540_c4_g4;TRINITY_DN100608_c0_g1;TRINITY_DN101360_c0_g2;TRINITY_DN104133_c0_g1;TRINITY_DN108160_c1_g2;TRINITY_DN109465_c0_g2;TRINITY_DN109489_c2_g3;TRINITY_DN109727_c1_g1;TRINITY_DN110349_c1_g5;TRINITY_DN112371_c0_g3;TRINITY_DN113294_c0_g1;TRINITY_DN113708_c0_g1;TRINITY_DN117626_c0_g1;TRINITY_DN119916_c0_g1;TRINITY_DN121558_c1_g2;TRINITY_DN121689_c0_g2;TRINITY_DN123286_c0_g2;TRINITY_…	23	5154	64	25617	0.00237562
GO:0009908	flower development	biological_process	6	TRINITY_DN100191_c1_g1;TRINITY_DN100540_c4_g4;TRINITY_DN100731_c0_g2;TRINITY_DN101862_c0_g1;TRINITY_DN103954_c0_g2;TRINITY_DN104476_c1_g1;TRINITY_DN105854_c0_g4;TRINITY_DN106132_c4_g2;TRINITY_DN106360_c0_g2;TRINITY_DN106395_c0_g2;TRINITY_DN109086_c1_g1;TRINITY_DN109446_c0_g1;TRINITY_DN109477_c1_g1;TRINITY_DN110305_c6_g1;TRINITY_DN112371_c0_g3;TRINITY_DN112390_c5_g1;TRINITY_DN113048_c2_g2;TRINITY_…	49	5154	166	25617	0.00244006
GO:0071258	cellular response to gravity	biological_process	6	TRINITY_DN106319_c3_g2;TRINITY_DN115652_c0_g1;TRINITY_DN119026_c1_g1;TRINITY_DN120777_c7_g3;TRINITY_DN122036_c1_g1;TRINITY_DN122036_c3_g3;TRINITY_DN88823_c1_g1;TRINITY_DN88823_c1_g2;TRINITY_DN91306_c4_g3;TRINITY_DN96450_c7_g3;TRINITY_DN98083_c1_g2;TRINITY_DN98083_c1_g3	12	5154	26	25617	0.00245784
GO:0015031	protein transport	biological_process	9	TRINITY_DN101073_c3_g1;TRINITY_DN102646_c0_g1;TRINITY_DN102759_c0_g1;TRINITY_DN104559_c0_g1;TRINITY_DN105542_c1_g1;TRINITY_DN106752_c1_g1;TRINITY_DN106960_c2_g2;TRINITY_DN107364_c0_g4;TRINITY_DN107632_c0_g3;TRINITY_DN107632_c0_g4;TRINITY_DN108158_c1_g1;TRINITY_DN108970_c0_g2;TRINITY_DN110113_c1_g3;TRINITY_DN110390_c0_g3;TRINITY_DN110409_c0_g1;TRINITY_DN110738_c1_g2;TRINITY_DN111025_c0_g1;TRINITY_…	62	5154	220	25617	0.002493
GO:0045298	tubulin complex	cellular_component	4	TRINITY_DN102267_c0_g1;TRINITY_DN105959_c2_g6;TRINITY_DN105959_c2_g7;TRINITY_DN106079_c2_g1;TRINITY_DN106319_c3_g2;TRINITY_DN109753_c1_g2;TRINITY_DN115652_c0_g1;TRINITY_DN117455_c5_g6;TRINITY_DN119026_c1_g1;TRINITY_DN120777_c7_g3;TRINITY_DN122036_c1_g1;TRINITY_DN122036_c3_g3;TRINITY_DN122753_c2_g1;TRINITY_DN122753_c4_g1;TRINITY_DN122753_c4_g3;TRINITY_DN88823_c1_g1;TRINITY_DN88823_c1_g2;TRINITY_DN…	21	5154	57	25617	0.00254889
GO:0080022	primary root development	biological_process	7	TRINITY_DN104043_c0_g1;TRINITY_DN105438_c0_g2;TRINITY_DN108195_c0_g2;TRINITY_DN112986_c1_g1;TRINITY_DN115298_c0_g1;TRINITY_DN115298_c0_g3;TRINITY_DN119654_c1_g1;TRINITY_DN92543_c0_g1;TRINITY_DN93814_c0_g1;TRINITY_DN93989_c0_g2;TRINITY_DN95543_c2_g2	11	5154	23	25617	0.00261608
GO:0010017	red or far-red light signaling pathway	biological_process	5	TRINITY_DN109153_c0_g3;TRINITY_DN109955_c0_g1;TRINITY_DN119458_c2_g4;TRINITY_DN121349_c0_g1;TRINITY_DN121401_c0_g3;TRINITY_DN121902_c2_g1;TRINITY_DN124710_c4_g1;TRINITY_DN88414_c0_g2;TRINITY_DN96791_c0_g1;TRINITY_DN99684_c0_g1	10	5154	20	25617	0.00270788
GO:0009694	jasmonic acid metabolic process	biological_process	9	TRINITY_DN100708_c0_g2;TRINITY_DN108813_c0_g1;TRINITY_DN108813_c0_g2;TRINITY_DN108813_c1_g1;TRINITY_DN96152_c1_g4;TRINITY_DN97902_c1_g1	6	5154	9	25617	0.00316066
GO:0048826	cotyledon morphogenesis	biological_process	5	TRINITY_DN110349_c1_g5;TRINITY_DN112371_c0_g3;TRINITY_DN92543_c0_g1;TRINITY_DN93814_c0_g1;TRINITY_DN93989_c0_g2;TRINITY_DN95543_c2_g2	6	5154	9	25617	0.00316066
GO:0005681	spliceosomal complex	cellular_component	6	TRINITY_DN100504_c0_g2;TRINITY_DN102942_c0_g1;TRINITY_DN107252_c0_g3;TRINITY_DN108008_c3_g2;TRINITY_DN108547_c0_g4;TRINITY_DN109749_c0_g4;TRINITY_DN110953_c0_g1;TRINITY_DN113725_c1_g1;TRINITY_DN115706_c1_g2;TRINITY_DN116194_c0_g1;TRINITY_DN116194_c0_g2;TRINITY_DN116456_c0_g1;TRINITY_DN118015_c1_g2;TRINITY_DN118151_c0_g1;TRINITY_DN118674_c2_g2;TRINITY_DN118722_c1_g1;TRINITY_DN120747_c0_g3;TRINITY_…	32	5154	100	25617	0.00338532
GO:0061512	protein localization to cilium	biological_process	8	TRINITY_DN100082_c0_g1;TRINITY_DN109863_c0_g1;TRINITY_DN112596_c0_g2;TRINITY_DN115266_c2_g1;TRINITY_DN117688_c0_g2;TRINITY_DN117885_c0_g1;TRINITY_DN94086_c0_g1;TRINITY_DN95715_c2_g5;TRINITY_DN96285_c1_g1;TRINITY_DN96285_c1_g2;TRINITY_DN96285_c1_g5	11	5154	24	25617	0.00395992
GO:0005929	cilium	cellular_component	4	TRINITY_DN100082_c0_g1;TRINITY_DN109863_c0_g1;TRINITY_DN112596_c0_g2;TRINITY_DN115266_c2_g1;TRINITY_DN117688_c0_g2;TRINITY_DN117885_c0_g1;TRINITY_DN94086_c0_g1;TRINITY_DN95715_c2_g5;TRINITY_DN96285_c1_g1;TRINITY_DN96285_c1_g2;TRINITY_DN96285_c1_g5	11	5154	24	25617	0.00395992
GO:0009751	response to salicylic acid	biological_process	6	TRINITY_DN101653_c2_g1;TRINITY_DN101653_c2_g2;TRINITY_DN103417_c0_g1;TRINITY_DN107448_c1_g2;TRINITY_DN107510_c1_g2;TRINITY_DN108414_c0_g1;TRINITY_DN109327_c0_g1;TRINITY_DN109327_c0_g2;TRINITY_DN110654_c1_g2;TRINITY_DN112423_c0_g2;TRINITY_DN113524_c0_g3;TRINITY_DN113635_c0_g1;TRINITY_DN114091_c0_g1;TRINITY_DN114487_c0_g2;TRINITY_DN114542_c0_g1;TRINITY_DN114826_c1_g2;TRINITY_DN115297_c2_g1;TRINITY_…	38	5154	125	25617	0.00408413
GO:0003918	DNA topoisomerase type II (ATP-hydrolyzing) activity	molecular_function	12	TRINITY_DN109659_c1_g1;TRINITY_DN109659_c1_g2;TRINITY_DN109659_c1_g5;TRINITY_DN115578_c0_g1;TRINITY_DN115578_c0_g2;TRINITY_DN116379_c0_g2;TRINITY_DN122961_c2_g2;TRINITY_DN124617_c4_g1;TRINITY_DN91138_c0_g4;TRINITY_DN98710_c1_g1	10	5154	21	25617	0.00424539
GO:0004004	ATP-dependent RNA helicase activity	molecular_function	11	TRINITY_DN100504_c0_g2;TRINITY_DN100548_c0_g5;TRINITY_DN100783_c0_g1;TRINITY_DN102156_c0_g1;TRINITY_DN102156_c0_g2;TRINITY_DN103629_c0_g3;TRINITY_DN104527_c1_g1;TRINITY_DN105869_c0_g1;TRINITY_DN106379_c0_g3;TRINITY_DN106483_c0_g1;TRINITY_DN109187_c2_g10;TRINITY_DN111513_c4_g1;TRINITY_DN112163_c0_g2;TRINITY_DN112399_c1_g1;TRINITY_DN112399_c2_g2;TRINITY_DN113025_c1_g1;TRINITY_DN113564_c1_g1;TRINITY…	48	5154	167	25617	0.00474887
GO:0004629	phospholipase C activity	molecular_function	8	TRINITY_DN102013_c0_g4;TRINITY_DN102495_c0_g2;TRINITY_DN110904_c0_g2;TRINITY_DN115999_c0_g2;TRINITY_DN124846_c5_g6	5	5154	7	25617	0.0047958
GO:0010540	basipetal auxin transport	biological_process	9	TRINITY_DN100382_c0_g1;TRINITY_DN101297_c1_g2;TRINITY_DN109572_c0_g1;TRINITY_DN123112_c0_g1;TRINITY_DN123112_c1_g2	5	5154	7	25617	0.0047958
GO:0048367	shoot system development	biological_process	6	TRINITY_DN100191_c1_g1;TRINITY_DN102228_c0_g2;TRINITY_DN104043_c0_g1;TRINITY_DN105438_c0_g2;TRINITY_DN112196_c0_g1;TRINITY_DN112889_c0_g1;TRINITY_DN113294_c0_g1;TRINITY_DN115987_c4_g2;TRINITY_DN116230_c0_g1;TRINITY_DN119783_c3_g2;TRINITY_DN119936_c1_g1;TRINITY_DN124005_c3_g1;TRINITY_DN124922_c6_g1;TRINITY_DN96463_c1_g4;TRINITY_DN96463_c1_g5;TRINITY_DN99265_c0_g1	16	5154	42	25617	0.00547529
GO:0018105	peptidyl-serine phosphorylation	biological_process	10	TRINITY_DN100015_c0_g1;TRINITY_DN100972_c0_g1;TRINITY_DN101297_c1_g2;TRINITY_DN101297_c1_g3;TRINITY_DN101426_c0_g5;TRINITY_DN103461_c1_g3;TRINITY_DN103730_c1_g3;TRINITY_DN105325_c2_g3;TRINITY_DN107679_c2_g2;TRINITY_DN108218_c1_g2;TRINITY_DN109572_c0_g1;TRINITY_DN110245_c0_g1;TRINITY_DN110739_c2_g1;TRINITY_DN111290_c0_g1;TRINITY_DN111434_c0_g1;TRINITY_DN112616_c4_g3;TRINITY_DN113919_c1_g3;TRINITY_…	47	5154	164	25617	0.00548039
GO:0006268	DNA unwinding involved in DNA replication	biological_process	10	TRINITY_DN100873_c2_g2;TRINITY_DN104843_c1_g2;TRINITY_DN109659_c1_g1;TRINITY_DN109659_c1_g2;TRINITY_DN109659_c1_g5;TRINITY_DN115998_c2_g1;TRINITY_DN116379_c0_g2;TRINITY_DN117495_c0_g3;TRINITY_DN118401_c0_g2;TRINITY_DN122961_c2_g2;TRINITY_DN123175_c3_g2;TRINITY_DN124617_c4_g1;TRINITY_DN91138_c0_g4;TRINITY_DN98710_c1_g1	14	5154	35	25617	0.00552683
GO:0045036	protein targeting to chloroplast	biological_process	12	TRINITY_DN105545_c0_g1;TRINITY_DN109578_c2_g2;TRINITY_DN109720_c1_g3;TRINITY_DN109963_c1_g1;TRINITY_DN112858_c0_g1;TRINITY_DN116822_c0_g3;TRINITY_DN118878_c1_g1;TRINITY_DN120833_c1_g1;TRINITY_DN120833_c1_g2;TRINITY_DN123682_c3_g3;TRINITY_DN123711_c2_g1;TRINITY_DN123711_c2_g5;TRINITY_DN95846_c0_g1;TRINITY_DN95846_c0_g2;TRINITY_DN96905_c1_g2	15	5154	39	25617	0.00636754
GO:0016607	nuclear speck	cellular_component	8	TRINITY_DN102942_c0_g1;TRINITY_DN105680_c0_g2;TRINITY_DN106302_c1_g1;TRINITY_DN106332_c1_g4;TRINITY_DN106485_c0_g1;TRINITY_DN107252_c0_g3;TRINITY_DN108008_c3_g2;TRINITY_DN108547_c0_g4;TRINITY_DN110953_c0_g1;TRINITY_DN111794_c0_g1;TRINITY_DN112647_c1_g2;TRINITY_DN112889_c0_g1;TRINITY_DN112986_c1_g1;TRINITY_DN115406_c0_g3;TRINITY_DN116456_c0_g1;TRINITY_DN117518_c0_g2;TRINITY_DN118722_c1_g1;TRINITY_…	21	5154	61	25617	0.00637446
GO:0000481	maturation of 5S rRNA	biological_process	12	TRINITY_DN122548_c1_g1;TRINITY_DN122548_c2_g1;TRINITY_DN122548_c2_g5;TRINITY_DN86610_c0_g1	4	5154	5	25617	0.00686858
GO:1990481	mRNA pseudouridine synthesis	biological_process	11	TRINITY_DN104558_c0_g1;TRINITY_DN110736_c0_g1;TRINITY_DN113040_c2_g4;TRINITY_DN122751_c1_g2	4	5154	5	25617	0.00686858
GO:0004775	succinate-CoA ligase (ADP-forming) activity	molecular_function	8	TRINITY_DN106716_c0_g2;TRINITY_DN116126_c0_g2;TRINITY_DN124251_c1_g1;TRINITY_DN99606_c2_g1	4	5154	5	25617	0.00686858
GO:0005652	nuclear lamina	cellular_component	6	TRINITY_DN116167_c0_g1;TRINITY_DN122532_c1_g2;TRINITY_DN124189_c3_g1;TRINITY_DN93345_c0_g1	4	5154	5	25617	0.00686858
GO:0045926	negative regulation of growth	biological_process	6	TRINITY_DN108139_c0_g1;TRINITY_DN111820_c0_g1;TRINITY_DN120819_c1_g1;TRINITY_DN93769_c0_g2	4	5154	5	25617	0.00686858
GO:0010332	response to gamma radiation	biological_process	7	TRINITY_DN110431_c0_g1;TRINITY_DN120343_c1_g1;TRINITY_DN87460_c0_g1;TRINITY_DN98489_c1_g1	4	5154	5	25617	0.00686858
GO:0005786	signal recognition particle, endoplasmic reticulum targeting	cellular_component	7	TRINITY_DN103214_c0_g2;TRINITY_DN110811_c0_g3;TRINITY_DN111756_c0_g1;TRINITY_DN116222_c0_g1;TRINITY_DN116586_c0_g2;TRINITY_DN119020_c0_g3;TRINITY_DN88483_c0_g1	7	5154	13	25617	0.00723306
GO:0046856	phosphatidylinositol dephosphorylation	biological_process	10	TRINITY_DN103975_c0_g2;TRINITY_DN107209_c0_g2;TRINITY_DN107468_c0_g1;TRINITY_DN114455_c4_g1;TRINITY_DN115169_c0_g1;TRINITY_DN121205_c2_g2;TRINITY_DN92964_c0_g2;TRINITY_DN99505_c5_g2	8	5154	16	25617	0.00725395
GO:0009698	phenylpropanoid metabolic process	biological_process	6	TRINITY_DN108337_c0_g1;TRINITY_DN108629_c0_g1;TRINITY_DN109579_c1_g3;TRINITY_DN118866_c0_g4;TRINITY_DN119591_c1_g1;TRINITY_DN119713_c0_g1;TRINITY_DN119713_c0_g6;TRINITY_DN122193_c0_g2	8	5154	16	25617	0.00725395
GO:0000463	maturation of LSU-rRNA from tricistronic rRNA transcript (SSU-rRNA, 5.8S rRNA, LSU-rRNA	biological_process	13	TRINITY_DN105489_c1_g1;TRINITY_DN106856_c0_g5;TRINITY_DN112483_c2_g1;TRINITY_DN114145_c1_g5;TRINITY_DN117972_c0_g3;TRINITY_DN118577_c2_g1;TRINITY_DN121568_c3_g3;TRINITY_DN122558_c1_g2;TRINITY_DN125233_c12_g1;TRINITY_DN87074_c0_g1;TRINITY_DN90785_c2_g1;TRINITY_DN99719_c2_g3	12	5154	29	25617	0.00725905
GO:0005654	nucleoplasm	cellular_component	6	TRINITY_DN101564_c1_g5;TRINITY_DN102026_c0_g1;TRINITY_DN102402_c0_g1;TRINITY_DN104098_c0_g1;TRINITY_DN104711_c0_g2;TRINITY_DN105241_c0_g1;TRINITY_DN105537_c2_g1;TRINITY_DN107855_c1_g2;TRINITY_DN109009_c0_g1;TRINITY_DN109009_c0_g2;TRINITY_DN112578_c1_g1;TRINITY_DN113409_c1_g1;TRINITY_DN113497_c1_g4;TRINITY_DN113899_c0_g2;TRINITY_DN113971_c2_g1;TRINITY_DN114648_c0_g1;TRINITY_DN116167_c0_g1;TRINITY_…	40	5154	138	25617	0.00801617
GO:0004722	protein serine/threonine phosphatase activity	molecular_function	9	TRINITY_DN100229_c2_g2;TRINITY_DN100296_c0_g1;TRINITY_DN100908_c0_g1;TRINITY_DN100954_c1_g1;TRINITY_DN102900_c0_g1;TRINITY_DN103241_c0_g2;TRINITY_DN103537_c1_g1;TRINITY_DN104041_c0_g2;TRINITY_DN105943_c3_g1;TRINITY_DN109523_c1_g1;TRINITY_DN110227_c1_g1;TRINITY_DN111820_c0_g1;TRINITY_DN111886_c1_g3;TRINITY_DN111935_c0_g3;TRINITY_DN112025_c1_g3;TRINITY_DN112860_c0_g1;TRINITY_DN114570_c0_g1;TRINITY_…	55	5154	201	25617	0.00802951
GO:0031415	NatA complex	cellular_component	7	TRINITY_DN110432_c2_g1;TRINITY_DN121301_c2_g1;TRINITY_DN121301_c2_g5	3	5154	3	25617	0.00814041
GO:0050982	detection of mechanical stimulus	biological_process	6	TRINITY_DN101870_c0_g1;TRINITY_DN122084_c0_g1;TRINITY_DN124263_c0_g1	3	5154	3	25617	0.00814041
GO:0006475	internal protein amino acid acetylation	biological_process	11	TRINITY_DN110432_c2_g1;TRINITY_DN121301_c2_g1;TRINITY_DN121301_c2_g5	3	5154	3	25617	0.00814041
GO:0080185	effector dependent induction by symbiont of host immune response	biological_process	11	TRINITY_DN108505_c2_g1;TRINITY_DN108505_c2_g3;TRINITY_DN91506_c0_g2	3	5154	3	25617	0.00814041
GO:0035101	FACT complex	cellular_component	5	TRINITY_DN121115_c1_g1;TRINITY_DN92590_c0_g1;TRINITY_DN97801_c1_g2	3	5154	3	25617	0.00814041
GO:0071020	post-spliceosomal complex	cellular_component	7	TRINITY_DN106276_c0_g1;TRINITY_DN106276_c0_g2;TRINITY_DN123166_c1_g1	3	5154	3	25617	0.00814041
GO:1990189	peptide-serine-N-acetyltransferase activity	molecular_function	11	TRINITY_DN110432_c2_g1;TRINITY_DN121301_c2_g1;TRINITY_DN121301_c2_g5	3	5154	3	25617	0.00814041
GO:0009743	response to carbohydrate	biological_process	6	TRINITY_DN121509_c0_g2;TRINITY_DN124769_c1_g2;TRINITY_DN99151_c0_g1	3	5154	3	25617	0.00814041
GO:1990190	peptide-glutamate-N-acetyltransferase activity	molecular_function	11	TRINITY_DN110432_c2_g1;TRINITY_DN121301_c2_g1;TRINITY_DN121301_c2_g5	3	5154	3	25617	0.00814041
GO:0071368	cellular response to cytokinin stimulus	biological_process	7	TRINITY_DN101115_c1_g1;TRINITY_DN104043_c0_g1;TRINITY_DN105438_c0_g2	3	5154	3	25617	0.00814041
GO:1990269	RNA polymerase II C-terminal domain phosphoserine binding	molecular_function	8	TRINITY_DN106360_c0_g2;TRINITY_DN123904_c2_g1;TRINITY_DN99303_c0_g2	3	5154	3	25617	0.00814041
GO:0045787	positive regulation of cell cycle	biological_process	7	TRINITY_DN109477_c1_g1;TRINITY_DN97705_c1_g3;TRINITY_DN98955_c2_g1	3	5154	3	25617	0.00814041
GO:0017198	N-terminal peptidyl-serine acetylation	biological_process	12	TRINITY_DN110432_c2_g1;TRINITY_DN121301_c2_g1;TRINITY_DN121301_c2_g5	3	5154	3	25617	0.00814041
GO:0005854	nascent polypeptide-associated complex	cellular_component	4	TRINITY_DN101073_c3_g1;TRINITY_DN124332_c2_g4;TRINITY_DN93512_c0_g1	3	5154	3	25617	0.00814041
GO:0009072	aromatic amino acid family metabolic process	biological_process	9	TRINITY_DN108290_c0_g4;TRINITY_DN119713_c0_g1;TRINITY_DN119713_c0_g6	3	5154	3	25617	0.00814041
[truncated: 3,573 more rows]
