# Supplementary material for: Identification of Small RNAs Associated with Salt Stress in Chrysanthemums through High-Throughput Sequencing and Bioinformatics Analysis
Source: Genes (Basel). 2023 Feb 23;14(3):561. doi: 10.3390/genes14030561 (PMC10048073; doi:10.3390/genes14030561)
Supplement: Supplementary file 1 [file genes-14-00561-s001.zip › table S7.xlsx]

## Sheet: leaf
miR_name	miR_seq	regulation	Accession	annotation	FPKM.SCK_L(mean)	FPKM.S200_L(mean)	regulation	go	kegg
aly-miR393a-3p	ATCATGCTATCTCTTTGGATT	down	TRINITY_DN100384_c5_g1	transformation/transcription domain-associated protein isoform X2 [Helianthus annuus]	24.05	14.51	down	GO:0005634(nucleus);GO:0006281(DNA repair);GO:0016301(kinase activity)	-	Y
aly-miR393a-3p	ATCATGCTATCTCTTTGGATT	down	TRINITY_DN100749_c0_g1	phosphate-induced protein 1 [Artemisia annua]	2.44	1.88	down	GO:0003674(molecular_function);GO:0005576(extracellular region);GO:0009505(plant-type cell wall);GO:0009506(plasmodesma);GO:0080167(response to karrikin)	-	Y
aly-miR393a-3p	ATCATGCTATCTCTTTGGATT	down	TRINITY_DN103276_c0_g1	GRAS protein, partial [Chrysanthemum x morifolium]	5.96	1.74	down	GO:0003700(DNA binding transcription factor activity);GO:0005634(nucleus);GO:0006355(regulation of transcription, DNA-templated);GO:0030154(cell differentiation);GO:0043565(sequence-specific DNA binding);GO:0048831(regulation of shoot system development)	ko04075(Plant hormone signal transduction)	Y
aly-miR393a-3p	ATCATGCTATCTCTTTGGATT	down	TRINITY_DN104869_c3_g1	Kri1-like, C-terminal [Artemisia annua]	3.3	4.5	up	GO:0003674(molecular_function);GO:0005634(nucleus);GO:0005829(cytosol);GO:0030686(90S preribosome)	-	Y
aly-miR393a-3p	ATCATGCTATCTCTTTGGATT	down	TRINITY_DN105133_c0_g1	Concanavalin A-like lectin/glucanase, subgroup [Artemisia annua]	15.45	2.73	down	GO:0004674(protein serine/threonine kinase activity);GO:0005886(plasma membrane)	-	Y
aly-miR393a-3p	ATCATGCTATCTCTTTGGATT	down	TRINITY_DN106918_c0_g1	WRC-like protein [Artemisia annua]	3.01	2.61	up	GO:0003674(molecular_function);GO:0005634(nucleus);GO:0006351(transcription, DNA-templated);GO:0032502(developmental process)	-	Y
aly-miR393a-3p	ATCATGCTATCTCTTTGGATT	down	TRINITY_DN108781_c0_g1	ferric reduction oxidase 7 [Artemisia annua]	196.04	1.5	down	GO:0000293(ferric-chelate reductase activity);GO:0006811(ion transport);GO:0009507(chloroplast);GO:0009767(photosynthetic electron transport chain);GO:0016020(membrane);GO:0016021(integral component of membrane);GO:0016491(oxidoreductase activity);GO:0031969(chloroplast membrane);GO:0046872(metal ion binding);GO:0055114(oxidation-reduction process)	-	Y
aly-miR393a-3p	ATCATGCTATCTCTTTGGATT	down	TRINITY_DN110293_c0_g3	DNA/RNA-binding protein Alba-like protein [Artemisia annua]	4.14	4.41	down	GO:0003729(mRNA binding);GO:0005829(cytosol)	ko03013(RNA transport);ko03008(Ribosome biogenesis in eukaryotes)	Y
aly-miR393a-3p	ATCATGCTATCTCTTTGGATT	down	TRINITY_DN112801_c0_g4	cyclase-associated protein CAP/septum formation inhibitor MinC [Artemisia annua]	7.52	6.08	down	GO:0005634(nucleus)	-	Y
aly-miR393a-3p	ATCATGCTATCTCTTTGGATT	down	TRINITY_DN112881_c2_g3	zinc finger, RING/FYVE/PHD-type [Artemisia annua]	2.81	2.11	down	GO:0004842(ubiquitin-protein transferase activity);GO:0005737(cytoplasm);GO:0009966(regulation of signal transduction)	-	Y
aly-miR393a-3p	ATCATGCTATCTCTTTGGATT	down	TRINITY_DN114058_c0_g1	hypothetical protein CTI12_AA093690 [Artemisia annua]	17.61	4.72	down	GO:0003674(molecular_function);GO:0008150(biological_process)	-	Y
aly-miR393a-3p	ATCATGCTATCTCTTTGGATT	down	TRINITY_DN114321_c1_g2	hypothetical protein CTI12_AA249000 [Artemisia annua]	4.25	13.71	up	GO:0003674(molecular_function);GO:0005634(nucleus);GO:0005886(plasma membrane);GO:0008150(biological_process)	-	Y
aly-miR393a-3p	ATCATGCTATCTCTTTGGATT	down	TRINITY_DN115144_c0_g2	Calcium-binding EF-hand [Artemisia annua]	9.51	6.14	down	GO:0003954(NADH dehydrogenase activity);GO:0005739(mitochondrion)	-	Y
aly-miR393a-3p	ATCATGCTATCTCTTTGGATT	down	TRINITY_DN116502_c3_g2	PREDICTED: 40S ribosomal protein S14 [Erythranthe guttata]	59.17	47.16	down	GO:0000028(ribosomal small subunit assembly);GO:0000462(maturation of SSU-rRNA from tricistronic rRNA transcript (SSU-rRNA, 5.8S rRNA, LSU-rRNA));GO:0003735(structural constituent of ribosome);GO:0006412(translation);GO:0022627(cytosolic small ribosomal subunit);GO:0048027(mRNA 5'-UTR binding);GO:0070181(small ribosomal subunit rRNA binding)	ko01502(Vancomycin resistance)	Y
aly-miR393a-3p	ATCATGCTATCTCTTTGGATT	down	TRINITY_DN117312_c1_g1	linoleate 13S-lipoxygenase 2-1 protein [Artemisia annua]	79.13	94.03	up	GO:0016165(linoleate 13S-lipoxygenase activity)	ko00591(Linoleic acid metabolism);ko00592(alpha-Linolenic acid metabolism)	Y
aly-miR393a-3p	ATCATGCTATCTCTTTGGATT	down	TRINITY_DN117446_c0_g1	rad21/Rec8-like protein [Artemisia annua]	13.45	12.61	up	GO:0000775(chromosome, centromeric region);GO:0000798(nuclear cohesin complex);GO:0003682(chromatin binding);GO:0005634(nucleus);GO:0006302(double-strand break repair);GO:0007062(sister chromatid cohesion);GO:0051301(cell division);GO:0070601(centromeric sister chromatid cohesion)	-	Y
aly-miR393a-3p	ATCATGCTATCTCTTTGGATT	down	TRINITY_DN118501_c0_g3	RING-H2 group F2A [Artemisia annua]	16.58	26.49	up	GO:0000209(protein polyubiquitination);GO:0043161(proteasome-mediated ubiquitin-dependent protein catabolic process);GO:0061630(ubiquitin protein ligase activity)	-	Y
aly-miR393a-3p	ATCATGCTATCTCTTTGGATT	down	TRINITY_DN118936_c0_g1	hypothetical protein CTI12_AA413170 [Artemisia annua]	5	3.87	down	-	-	Y
aly-miR393a-3p	ATCATGCTATCTCTTTGGATT	down	TRINITY_DN119152_c2_g2	asparagine synthetase 3 [Artemisia annua]	44.19	29.91	down	GO:0004066(asparagine synthase (glutamine-hydrolyzing) activity);GO:0005829(cytosol);GO:0006529(asparagine biosynthetic process);GO:0006541(glutamine metabolic process);GO:0042803(protein homodimerization activity)	ko00250(Alanine, aspartate and glutamate metabolism)	Y
aly-miR393a-3p	ATCATGCTATCTCTTTGGATT	down	TRINITY_DN119178_c0_g2	calcium ion binding protein [Artemisia annua]	8.2	7.26	down	GO:0005509(calcium ion binding);GO:0005794(Golgi apparatus);GO:0006004(fucose metabolic process);GO:0016021(integral component of membrane);GO:0016757(transferase activity, transferring glycosyl groups);GO:0042175(nuclear outer membrane-endoplasmic reticulum membrane network)	-	Y
aly-miR393a-3p	ATCATGCTATCTCTTTGGATT	down	TRINITY_DN120718_c0_g1	uncharacterized protein LOC111889850 [Lactuca sativa]	15.34	11.32	down	-	-	Y
aly-miR393a-3p	ATCATGCTATCTCTTTGGATT	down	TRINITY_DN121159_c2_g1	Aux/IAA-ARF-dimerization [Cynara cardunculus var. scolymus]	7.5	7.97	up	GO:0003700(DNA binding transcription factor activity);GO:0005515(protein binding);GO:0005634(nucleus);GO:0006351(transcription, DNA-templated);GO:0008285(negative regulation of cell proliferation);GO:0009734(auxin-activated signaling pathway);GO:0009737(response to abscisic acid);GO:0009911(positive regulation of flower development);GO:0010047(fruit dehiscence);GO:0010150(leaf senescence);GO:0010…	ko04075(Plant hormone signal transduction)	Y
aly-miR393a-3p	ATCATGCTATCTCTTTGGATT	down	TRINITY_DN121848_c1_g2	cullin4 [Artemisia annua]	10.71	10.1	up	GO:0031625(ubiquitin protein ligase binding);GO:0061630(ubiquitin protein ligase activity);GO:0080008(Cul4-RING E3 ubiquitin ligase complex)	ko04120(Ubiquitin mediated proteolysis);ko03420(Nucleotide excision repair)	Y
aly-miR393a-3p	ATCATGCTATCTCTTTGGATT	down	TRINITY_DN122105_c2_g1	casein kinase 1-like protein 2 isoform X2 [Solanum lycopersicum]	23.63	17.58	down	GO:0004674(protein serine/threonine kinase activity);GO:0005634(nucleus);GO:0005737(cytoplasm);GO:0006897(endocytosis);GO:0008360(regulation of cell shape);GO:0016055(Wnt signaling pathway);GO:0018105(peptidyl-serine phosphorylation)	-	Y
aly-miR393a-3p	ATCATGCTATCTCTTTGGATT	down	TRINITY_DN123013_c2_g2	regulator of chromosome condensation 1/beta-lactamase-inhibitor protein II [Artemisia annua]	19.73	41.89	up	GO:0005737(cytoplasm);GO:0008150(biological_process);GO:0008536(Ran GTPase binding)	ko04120(Ubiquitin mediated proteolysis)	Y
aly-miR393a-3p	ATCATGCTATCTCTTTGGATT	down	TRINITY_DN123334_c6_g4	probable calcium-binding protein CML21 [Helianthus annuus]	11.59	12.19	up	GO:0005509(calcium ion binding);GO:0005634(nucleus);GO:0005737(cytoplasm)	ko04626(Plant-pathogen interaction)	Y
aly-miR393a-3p	ATCATGCTATCTCTTTGGATT	down	TRINITY_DN123995_c6_g4	seed imbibition 1 [Artemisia annua]	8.08	5.78	up	GO:0003676(nucleic acid binding);GO:0004553(hydrolase activity, hydrolyzing O-glycosyl compounds);GO:0004857(enzyme inhibitor activity);GO:0005737(cytoplasm);GO:0005975(carbohydrate metabolic process);GO:0046872(metal ion binding);GO:0047274(galactinol-sucrose galactosyltransferase activity)	ko00052(Galactose metabolism)	Y
aly-miR393a-3p	ATCATGCTATCTCTTTGGATT	down	TRINITY_DN124503_c2_g1	mitogen-activated protein kinase kinase kinase 3 [Artemisia annua]	18.28	15.85	down	GO:0005737(cytoplasm)	-	Y
aly-miR393a-3p	ATCATGCTATCTCTTTGGATT	down	TRINITY_DN125148_c7_g1	kinase interacting (KIP1-like) family protein [Artemisia annua]	1.54	1.31	down	GO:0005886(plasma membrane);GO:0051015(actin filament binding)	-	Y
aly-miR393a-3p	ATCATGCTATCTCTTTGGATT	down	TRINITY_DN91665_c0_g1	oxysterol-binding protein [Artemisia annua]	14.85	12.29	down	GO:0005634(nucleus);GO:0005829(cytosol);GO:0006869(lipid transport);GO:0008142(oxysterol binding);GO:0008152(metabolic process);GO:0008202(steroid metabolic process);GO:0008289(lipid binding);GO:0016787(hydrolase activity)	-	Y
aly-miR393a-3p	ATCATGCTATCTCTTTGGATT	down	TRINITY_DN92355_c1_g1	hypothetical protein CTI12_AA184440 [Artemisia annua]	3.83	2.51	down	GO:0003723(RNA binding);GO:0005634(nucleus);GO:0005737(cytoplasm);GO:0006281(DNA repair);GO:0006397(mRNA processing);GO:0008380(RNA splicing);GO:0009507(chloroplast);GO:0043484(regulation of RNA splicing)	ko03040(Spliceosome)	Y
aly-miR393a-3p	ATCATGCTATCTCTTTGGATT	down	TRINITY_DN93164_c1_g1	protein kinase superfamily protein [Artemisia annua]	4.67	4.75	up	GO:0004674(protein serine/threonine kinase activity);GO:0005524(ATP binding);GO:0005886(plasma membrane);GO:0016021(integral component of membrane);GO:0016301(kinase activity);GO:0046777(protein autophosphorylation)	-	Y
aly-miR393a-3p	ATCATGCTATCTCTTTGGATT	down	TRINITY_DN93935_c0_g1	calcium-binding EF-hand family protein [Artemisia annua]	89.8	47.08	down	GO:0004198(calcium-dependent cysteine-type endopeptidase activity);GO:0005737(cytoplasm);GO:0006508(proteolysis)	ko04626(Plant-pathogen interaction)	Y
aly-miR393a-3p	ATCATGCTATCTCTTTGGATT	down	TRINITY_DN94329_c0_g1	adenylate kinase, chloroplastic isoform X1 [Helianthus annuus]	13.37	4.4	down	GO:0004017(adenylate kinase activity);GO:0005524(ATP binding);GO:0009507(chloroplast);GO:0009570(chloroplast stroma)	ko00230(Purine metabolism);ko00730(Thiamine metabolism)	Y
aly-miR393a-3p	ATCATGCTATCTCTTTGGATT	down	TRINITY_DN94364_c0_g1	hypothetical protein CTI12_AA167260 [Artemisia annua]	8.42	12.38	up	-	-	Y
aly-miR393a-3p	ATCATGCTATCTCTTTGGATT	down	TRINITY_DN98216_c1_g3	RAB GTPase [Artemisia annua]	20.83	11.8	down	GO:0003924(GTPase activity);GO:0005525(GTP binding);GO:0005768(endosome);GO:0005794(Golgi apparatus);GO:0005886(plasma membrane);GO:0009504(cell plate);GO:0010008(endosome membrane);GO:0015031(protein transport);GO:0032482(Rab protein signal transduction);GO:0042546(cell wall biogenesis)	ko04144(Endocytosis)	Y
aly-miR393a-3p	ATCATGCTATCTCTTTGGATT	down	TRINITY_DN98513_c0_g1	hypothetical protein CTI12_AA093690 [Artemisia annua]	15.3	7.99	down	-	-	Y
aly-miR393a-5p	TCCAAAGGGATCGCATTGATCC	down	TRINITY_DN110658_c1_g1	spc97 / Spc98 family of spindle pole body (SBP) component [Artemisia annua]	8.22	11.86	up	GO:0000923(equatorial microtubule organizing center);GO:0005200(structural constituent of cytoskeleton);GO:0005813(centrosome);GO:0005816(spindle pole body);GO:0008275(gamma-tubulin small complex);GO:0031122(cytoplasmic microtubule organization);GO:0043015(gamma-tubulin binding);GO:0051011(microtubule minus-end binding);GO:0051298(centrosome duplication);GO:0051415(microtubule nucleation by inter…	-	Y
aly-miR393a-5p	TCCAAAGGGATCGCATTGATCC	down	TRINITY_DN111441_c0_g1	F-box/RNI-like superfamily protein [Artemisia annua]	53.01	39.32	up	GO:0000822(inositol hexakisphosphate binding);GO:0009734(auxin-activated signaling pathway)	ko04075(Plant hormone signal transduction)	Y
aly-miR393a-5p	TCCAAAGGGATCGCATTGATCC	down	TRINITY_DN112001_c0_g2	-	82.17	133.81	up	-	-	Y
aly-miR393a-5p	TCCAAAGGGATCGCATTGATCC	down	TRINITY_DN113132_c0_g1	F-box domain, Leucine-rich repeat domain, L domain-like protein [Artemisia annua]	16.02	14.14	up	GO:0000822(inositol hexakisphosphate binding);GO:0009734(auxin-activated signaling pathway)	ko04075(Plant hormone signal transduction)	Y
aly-miR393a-5p	TCCAAAGGGATCGCATTGATCC	down	TRINITY_DN114227_c0_g3	threonyl-tRNA synthetase [Artemisia annua]	22.99	25.67	up	GO:0003723(RNA binding);GO:0004829(threonine-tRNA ligase activity);GO:0005737(cytoplasm);GO:0006435(threonyl-tRNA aminoacylation)	ko00970(Aminoacyl-tRNA biosynthesis)	Y
aly-miR393a-5p	TCCAAAGGGATCGCATTGATCC	down	TRINITY_DN114389_c0_g1	RNA-binding (RRM/RBD/RNP motifs) family protein [Artemisia annua]	2.86	1.96	down	GO:0003677(DNA binding);GO:0003723(RNA binding);GO:0003729(mRNA binding);GO:0004518(nuclease activity);GO:0005575(cellular_component);GO:0008150(biological_process);GO:0046872(metal ion binding)	-	Y
aly-miR393a-5p	TCCAAAGGGATCGCATTGATCC	down	TRINITY_DN123358_c3_g3	transport inhibitor response 1-like protein Os04g0395600 [Lactuca sativa]	5.63	6.06	up	GO:0000822(inositol hexakisphosphate binding);GO:0009734(auxin-activated signaling pathway)	ko04075(Plant hormone signal transduction)	Y
aly-miR393a-5p	TCCAAAGGGATCGCATTGATCC	down	TRINITY_DN123650_c1_g2	F-box/RNI-like superfamily protein [Artemisia annua]	11.73	11.56	up	GO:0000822(inositol hexakisphosphate binding);GO:0009734(auxin-activated signaling pathway)	ko04075(Plant hormone signal transduction)	Y
aly-miR393a-5p	TCCAAAGGGATCGCATTGATCC	down	TRINITY_DN123650_c1_g4	hypothetical protein LSAT_9X4820 [Lactuca sativa]	53.1	27.53	down	GO:0000822(inositol hexakisphosphate binding);GO:0009734(auxin-activated signaling pathway)	ko04075(Plant hormone signal transduction)	Y
aly-miR393a-5p	TCCAAAGGGATCGCATTGATCC	down	TRINITY_DN92591_c0_g2	-	35.21	26.85	down	-	-	Y
aly-miR858-5p_L-1R+1	TTCGTTGTCTGTTCGACCTTG	down	TRINITY_DN101750_c0_g1	dnaJ domain-containing protein [Artemisia annua]	25.25	37.06	up	GO:0005634(nucleus);GO:0005737(cytoplasm);GO:0006457(protein folding)	-	Y
aly-miR858-5p_L-1R+1	TTCGTTGTCTGTTCGACCTTG	down	TRINITY_DN105860_c2_g2	CWC16 protein [Artemisia annua]	14.68	11.66	down	GO:0003674(molecular_function);GO:0005634(nucleus);GO:0008150(biological_process)	-	Y
aly-miR858-5p_L-1R+1	TTCGTTGTCTGTTCGACCTTG	down	TRINITY_DN106803_c0_g1	hypothetical protein CTI12_AA415640 [Artemisia annua]	9.13	8.98	up	GO:0003674(molecular_function);GO:0008150(biological_process);GO:0070531(BRCA1-A complex);GO:0070552(BRISC complex)	ko03440(Homologous recombination)	Y
aly-miR858-5p_L-1R+1	TTCGTTGTCTGTTCGACCTTG	down	TRINITY_DN107787_c2_g2	protein kinase-like domain-containing protein [Artemisia annua]	4.16	3.14	down	GO:0004674(protein serine/threonine kinase activity);GO:0005634(nucleus);GO:0005737(cytoplasm);GO:0006897(endocytosis);GO:0008360(regulation of cell shape);GO:0016055(Wnt signaling pathway);GO:0018105(peptidyl-serine phosphorylation)	-	Y
aly-miR858-5p_L-1R+1	TTCGTTGTCTGTTCGACCTTG	down	TRINITY_DN109367_c0_g3	Proteasome B-type subunit [Artemisia annua]	6.89	6.17	up	GO:0000502(proteasome complex);GO:0004298(threonine-type endopeptidase activity);GO:0005634(nucleus);GO:0005737(cytoplasm);GO:0005773(vacuole);GO:0005774(vacuolar membrane);GO:0005829(cytosol);GO:0005839(proteasome core complex);GO:0005886(plasma membrane);GO:0006511(ubiquitin-dependent protein catabolic process);GO:0008233(peptidase activity);GO:0010499(proteasomal ubiquitin-independent protein …	ko03050(Proteasome)	Y
aly-miR858-5p_L-1R+1	TTCGTTGTCTGTTCGACCTTG	down	TRINITY_DN109819_c1_g5	ribosomal protein L18/L5, Ribosomal protein L5 eukaryotic/L18 archaeal [Artemisia annua]	9.9	7.84	up	GO:0000027(ribosomal large subunit assembly);GO:0003735(structural constituent of ribosome);GO:0006412(translation);GO:0008097(5S rRNA binding);GO:0022625(cytosolic large ribosomal subunit)	ko03010(Ribosome)	Y
aly-miR858-5p_L-1R+1	TTCGTTGTCTGTTCGACCTTG	down	TRINITY_DN117363_c0_g1	ARM repeat superfamily protein [Artemisia annua]	5.63	5.42	up	GO:0005634(nucleus);GO:0005737(cytoplasm)	ko04075(Plant hormone signal transduction)	Y
aly-miR858-5p_L-1R+1	TTCGTTGTCTGTTCGACCTTG	down	TRINITY_DN118689_c0_g1	tetratricopeptide repeat (TPR)-like superfamily protein [Artemisia annua]	18.48	11.04	down	GO:0005515(protein binding);GO:0005737(cytoplasm);GO:0005769(early endosome);GO:0005802(trans-Golgi network);GO:0005829(cytosol);GO:0006887(exocytosis);GO:0016020(membrane);GO:0016192(vesicle-mediated transport);GO:0048767(root hair elongation);GO:0048768(root hair cell tip growth);GO:0080147(root hair cell development)	-	Y
aly-miR858-5p_L-1R+1	TTCGTTGTCTGTTCGACCTTG	down	TRINITY_DN119360_c2_g2	predicted protein [Hordeum vulgare subsp. vulgare]	1.07	1.05	up	GO:0002182(cytoplasmic translational elongation);GO:0003746(translation elongation factor activity);GO:0003924(GTPase activity);GO:0005516(calmodulin binding);GO:0005525(GTP binding);GO:0005576(extracellular region);GO:0005634(nucleus);GO:0005829(cytosol);GO:0006409(tRNA export from nucleus);GO:0019003(GDP binding);GO:0030445(yeast-form cell wall);GO:0030446(hyphal cell wall)	ko03013(RNA transport)	Y
aly-miR858-5p_L-1R+1	TTCGTTGTCTGTTCGACCTTG	down	TRINITY_DN121181_c1_g1	CCT domain-containing protein [Artemisia annua]	34.7	114.76	up	GO:0003700(DNA binding transcription factor activity);GO:0005515(protein binding);GO:0005634(nucleus);GO:0006355(regulation of transcription, DNA-templated);GO:0008270(zinc ion binding);GO:0016020(membrane)	ko04712(Circadian rhythm - plant)	Y
aly-miR858-5p_L-1R+1	TTCGTTGTCTGTTCGACCTTG	down	TRINITY_DN122216_c1_g1	pantothenate kinase 2 [Artemisia annua]	15.42	8.38	down	GO:0004594(pantothenate kinase activity);GO:0005515(protein binding);GO:0005524(ATP binding);GO:0005737(cytoplasm);GO:0005829(cytosol);GO:0015937(coenzyme A biosynthetic process);GO:0016310(phosphorylation)	ko00770(Pantothenate and CoA biosynthesis)	Y
aly-miR858-5p_L-1R+1	TTCGTTGTCTGTTCGACCTTG	down	TRINITY_DN124101_c3_g1	-	100.01	78.18	down	-	-	Y
aly-miR858-5p_L-1R+1	TTCGTTGTCTGTTCGACCTTG	down	TRINITY_DN92233_c3_g1	psbP family [Artemisia annua]	87.75	48.85	down	-	-	Y
aly-miR858-5p_L-1R+1	TTCGTTGTCTGTTCGACCTTG	down	TRINITY_DN96986_c1_g2	casein lytic proteinase B3 [Artemisia annua]	16.32	7.77	down	GO:0005524(ATP binding);GO:0005737(cytoplasm);GO:0009408(response to heat);GO:0009507(chloroplast);GO:0009532(plastid stroma);GO:0009570(chloroplast stroma);GO:0009658(chloroplast organization);GO:0016485(protein processing);GO:0016887(ATPase activity)	-	Y
aly-miR858-5p_L-1R+1	TTCGTTGTCTGTTCGACCTTG	down	TRINITY_DN97181_c0_g1	20S proteasome beta subunit D1 [Artemisia annua]	23.64	19.53	down	GO:0000502(proteasome complex);GO:0004298(threonine-type endopeptidase activity);GO:0005634(nucleus);GO:0005737(cytoplasm);GO:0005773(vacuole);GO:0005774(vacuolar membrane);GO:0005829(cytosol);GO:0005839(proteasome core complex);GO:0005886(plasma membrane);GO:0006511(ubiquitin-dependent protein catabolic process);GO:0008233(peptidase activity);GO:0010499(proteasomal ubiquitin-independent protein …	ko03050(Proteasome)	Y
aly-miR858-5p_L-1R+1	TTCGTTGTCTGTTCGACCTTG	down	TRINITY_DN97565_c1_g2	serine-threonine/tyrosine-protein kinase catalytic domain-containing protein [Artemisia annua]	12.3	7.62	down	GO:0004674(protein serine/threonine kinase activity);GO:0005886(plasma membrane)	-	Y
aly-miR858-5p_L-1R+1	TTCGTTGTCTGTTCGACCTTG	down	TRINITY_DN97624_c8_g1	-	7475.8	14090.1	up	GO:0008234(cysteine-type peptidase activity)	-	Y
aly-miR858-5p_L-1R+1	TTCGTTGTCTGTTCGACCTTG	down	TRINITY_DN97933_c0_g1	microtubule associated protein (MAP65/ASE1) family protein [Artemisia annua]	5.85	7.86	up	GO:0000910(cytokinesis);GO:0005634(nucleus);GO:0005739(mitochondrion);GO:0005874(microtubule);GO:0007020(microtubule nucleation);GO:0008017(microtubule binding);GO:0009524(phragmoplast);GO:0009536(plastid);GO:0009574(preprophase band);GO:0031116(positive regulation of microtubule polymerization)	-	Y
bol-MIR9410-p3_2ss5TG18TA	CTTTGCAGACGACTTAAATA	down	TRINITY_DN103722_c0_g3	Pentatricopeptide repeat-containing protein [Artemisia annua]	1.41	7.38	up	GO:0003674(molecular_function);GO:0005739(mitochondrion);GO:0008150(biological_process)	-	Y
bol-MIR9410-p3_2ss5TG18TA	CTTTGCAGACGACTTAAATA	down	TRINITY_DN106677_c1_g1	Acyl-CoA-binding protein, ACBP [Artemisia annua]	4.74	17.6	up	GO:0000062(fatty-acyl-CoA binding);GO:0001666(response to hypoxia);GO:0005576(extracellular region);GO:0005615(extracellular space);GO:0006952(defense response);GO:0008289(lipid binding);GO:0009617(response to bacterium);GO:0009646(response to absence of light);GO:0015908(fatty acid transport);GO:0042742(defense response to bacterium);GO:0050832(defense response to fungus)	-	Y
bol-MIR9410-p3_2ss5TG18TA	CTTTGCAGACGACTTAAATA	down	TRINITY_DN114034_c0_g1	smad nuclear-interacting protein 1 [Artemisia annua]	4.49	9.9	up	GO:0003723(RNA binding);GO:0003729(mRNA binding);GO:0005515(protein binding);GO:0005634(nucleus);GO:0005829(cytosol);GO:0008283(cell proliferation);GO:0009507(chloroplast);GO:0035196(production of miRNAs involved in gene silencing by miRNA);GO:0048638(regulation of developmental growth)	-	Y
bol-MIR9410-p3_2ss5TG18TA	CTTTGCAGACGACTTAAATA	down	TRINITY_DN118361_c1_g1	heme peroxidase [Artemisia annua]	102.92	1254.55	up	GO:0003700(DNA binding transcription factor activity);GO:0005515(protein binding);GO:0005634(nucleus);GO:0006351(transcription, DNA-templated);GO:0006355(regulation of transcription, DNA-templated);GO:0043565(sequence-specific DNA binding);GO:0044212(transcription regulatory region DNA binding);GO:0045892(negative regulation of transcription, DNA-templated)	-	Y
bol-MIR9410-p3_2ss5TG18TA	CTTTGCAGACGACTTAAATA	down	TRINITY_DN121185_c0_g1	Armadillo-like helical [Artemisia annua]	2.82	2.81	up	GO:0004379(glycylpeptide N-tetradecanoyltransferase activity);GO:0005737(cytoplasm);GO:0018008(N-terminal peptidyl-glycine N-myristoylation)	-	Y
bol-MIR9410-p3_2ss5TG18TA	CTTTGCAGACGACTTAAATA	down	TRINITY_DN121291_c1_g1	alpha/Beta hydrolase fold protein [Artemisia annua]	77.51	7.87	down	GO:0000304(response to singlet oxygen);GO:0001666(response to hypoxia);GO:0004806(triglyceride lipase activity);GO:0005515(protein binding);GO:0005634(nucleus);GO:0005737(cytoplasm);GO:0005783(endoplasmic reticulum);GO:0006629(lipid metabolic process);GO:0006952(defense response);GO:0009507(chloroplast);GO:0009626(plant-type hypersensitive response);GO:0009627(systemic acquired resistance);GO:000…	ko04626(Plant-pathogen interaction)	Y
bol-MIR9410-p3_2ss5TG18TA	CTTTGCAGACGACTTAAATA	down	TRINITY_DN123536_c0_g1	RWP-RK domain-containing protein [Artemisia annua]	15.09	15.15	up	-	-	Y
cca-MIR6111-p3_2ss17GA19CT	TTATGAAGGTAGTCTAACTCAC	down	TRINITY_DN104413_c0_g2	PREDICTED: exonuclease 1 [Ipomoea nil]	3.85	5.55	up	GO:0003677(DNA binding);GO:0004518(nuclease activity);GO:0004519(endonuclease activity);GO:0005634(nucleus);GO:0006281(DNA repair);GO:0035312(5'-3' exodeoxyribonuclease activity);GO:0046872(metal ion binding)	ko03430(Mismatch repair)	Y
cca-MIR6111-p3_2ss17GA19CT	TTATGAAGGTAGTCTAACTCAC	down	TRINITY_DN106670_c2_g3	formin-like protein 18 [Artemisia annua]	0.44	0.17	down	-	-	Y
cca-MIR6111-p3_2ss17GA19CT	TTATGAAGGTAGTCTAACTCAC	down	TRINITY_DN111297_c0_g4	-	6.18	5.03	down	-	-	Y
cca-MIR6111-p3_2ss17GA19CT	TTATGAAGGTAGTCTAACTCAC	down	TRINITY_DN111961_c4_g1	uncharacterized protein At4g26485-like isoform X1 [Coffea arabica]	7.97	4.6	down	-	-	Y
cca-MIR6111-p3_2ss17GA19CT	TTATGAAGGTAGTCTAACTCAC	down	TRINITY_DN112653_c1_g1	hypothetical protein CTI12_AA262210 [Artemisia annua]	2.6	2.64	up	-	-	Y
cca-MIR6111-p3_2ss17GA19CT	TTATGAAGGTAGTCTAACTCAC	down	TRINITY_DN116155_c0_g1	hypothetical protein CTI12_AA431800 [Artemisia annua]	3.86	4.48	up	-	-	Y
cca-MIR6111-p3_2ss17GA19CT	TTATGAAGGTAGTCTAACTCAC	down	TRINITY_DN116437_c0_g1	decapping nuclease DXO homolog, chloroplastic [Cynara cardunculus var. scolymus]	12.37	10.23	down	GO:0000166(nucleotide binding);GO:0003723(RNA binding);GO:0004518(nuclease activity);GO:0005829(cytosol);GO:0008150(biological_process);GO:0009507(chloroplast);GO:0046872(metal ion binding)	-	Y
cca-MIR6111-p3_2ss17GA19CT	TTATGAAGGTAGTCTAACTCAC	down	TRINITY_DN119628_c1_g7	ATPase, AAA-type, core [Artemisia annua]	6.36	2.14	down	GO:0002237(response to molecule of bacterial origin);GO:0005524(ATP binding);GO:0005739(mitochondrion);GO:0005740(mitochondrial envelope);GO:0005741(mitochondrial outer membrane);GO:0005886(plasma membrane);GO:0008219(cell death);GO:0009411(response to UV);GO:0009617(response to bacterium);GO:0009626(plant-type hypersensitive response);GO:0009863(salicylic acid mediated signaling pathway);GO:0016…	-	Y
cca-MIR6111-p3_2ss17GA19CT	TTATGAAGGTAGTCTAACTCAC	down	TRINITY_DN120302_c4_g1	ulp1 protease family, C-terminal catalytic domain-containing protein [Artemisia annua]	4.5	6.06	up	-	-	Y
cca-miR6111-5p_1ss5TG	TCTTGATGTCACGATGTATGAC	down	TRINITY_DN105325_c2_g3	PREDICTED: casein kinase 1-like protein 2 isoform X1 [Musa acuminata subsp. malaccensis]	7.48	4.8	down	GO:0004674(protein serine/threonine kinase activity);GO:0005634(nucleus);GO:0005737(cytoplasm);GO:0006897(endocytosis);GO:0008360(regulation of cell shape);GO:0016055(Wnt signaling pathway);GO:0018105(peptidyl-serine phosphorylation)	-	Y
cca-miR6111-5p_1ss5TG	TCTTGATGTCACGATGTATGAC	down	TRINITY_DN105494_c6_g5	hypothetical protein LSAT_9X122720 [Lactuca sativa]	9.42	4.7	down	GO:0004672(protein kinase activity);GO:0004674(protein serine/threonine kinase activity);GO:0005524(ATP binding);GO:0005886(plasma membrane);GO:0006468(protein phosphorylation);GO:0009506(plasmodesma);GO:0009741(response to brassinosteroid);GO:0009742(brassinosteroid mediated signaling pathway);GO:0009791(post-embryonic development);GO:0009826(unidimensional cell growth);GO:0016021(integral compo…	-	Y
cca-miR6111-5p_1ss5TG	TCTTGATGTCACGATGTATGAC	down	TRINITY_DN107442_c0_g1	Proteasome component (PCI) domain-containing protein [Artemisia annua]	29.3	24.59	down	GO:0001732(formation of cytoplasmic translation initiation complex);GO:0002188(translation reinitiation);GO:0003729(mRNA binding);GO:0003743(translation initiation factor activity);GO:0005515(protein binding);GO:0005737(cytoplasm);GO:0005829(cytosol);GO:0005852(eukaryotic translation initiation factor 3 complex);GO:0005886(plasma membrane);GO:0006413(translational initiation);GO:0043614(multi-eIF…	ko03013(RNA transport)	Y
cca-miR6111-5p_1ss5TG	TCTTGATGTCACGATGTATGAC	down	TRINITY_DN109083_c3_g2	protein kinase-like domain-containing protein [Artemisia annua]	1.74	0.76	down	-	-	Y
cca-miR6111-5p_1ss5TG	TCTTGATGTCACGATGTATGAC	down	TRINITY_DN110058_c2_g1	protein kinase-like domain-containing protein (mitochondrion) [Artemisia annua]	3.35	2.25	down	GO:0004674(protein serine/threonine kinase activity);GO:0005524(ATP binding);GO:0005886(plasma membrane);GO:0006468(protein phosphorylation);GO:0009506(plasmodesma);GO:0016021(integral component of membrane);GO:0016301(kinase activity);GO:0046777(protein autophosphorylation)	-	Y
cca-miR6111-5p_1ss5TG	TCTTGATGTCACGATGTATGAC	down	TRINITY_DN110083_c0_g1	serine/threonine-protein kinase [Artemisia annua]	4.92	6.14	up	GO:0004674(protein serine/threonine kinase activity);GO:0005829(cytosol);GO:0006468(protein phosphorylation);GO:0035556(intracellular signal transduction)	-	Y
cca-miR6111-5p_1ss5TG	TCTTGATGTCACGATGTATGAC	down	TRINITY_DN111445_c1_g1	putative protein kinase-like domain-containing protein [Helianthus annuus]	13.71	9.29	down	GO:0004675(transmembrane receptor protein serine/threonine kinase activity);GO:0005524(ATP binding);GO:0005634(nucleus);GO:0005737(cytoplasm);GO:0005886(plasma membrane);GO:0006468(protein phosphorylation);GO:0006952(defense response);GO:0007166(cell surface receptor signaling pathway);GO:0009507(chloroplast);GO:0016301(kinase activity)	-	Y
cca-miR6111-5p_1ss5TG	TCTTGATGTCACGATGTATGAC	down	TRINITY_DN113762_c0_g2	protein kinase-like domain-containing protein [Artemisia annua]	2.09	1.4	down	GO:0002237(response to molecule of bacterial origin);GO:0005515(protein binding);GO:0005775(vacuolar lumen);GO:0005886(plasma membrane);GO:0006486(protein glycosylation);GO:0009877(nodulation);GO:1900150(regulation of defense response to fungus);GO:1902290(positive regulation of defense response to oomycetes)	-	Y
cca-miR6111-5p_1ss5TG	TCTTGATGTCACGATGTATGAC	down	TRINITY_DN115115_c0_g1	tyrosine-sulfated glycopeptide receptor 1-like [Cynara cardunculus var. scolymus]	2.27	3.55	up	GO:0001653(peptide receptor activity);GO:0004674(protein serine/threonine kinase activity);GO:0004888(transmembrane signaling receptor activity);GO:0005515(protein binding);GO:0005524(ATP binding);GO:0005886(plasma membrane);GO:0006468(protein phosphorylation);GO:0007169(transmembrane receptor protein tyrosine kinase signaling pathway);GO:0009611(response to wounding);GO:0009826(unidimensional ce…	ko04075(Plant hormone signal transduction)	Y
cca-miR6111-5p_1ss5TG	TCTTGATGTCACGATGTATGAC	down	TRINITY_DN115169_c0_g1	endonuclease/exonuclease/phosphatase family protein [Artemisia annua]	7.98	10.4	up	GO:0004439(phosphatidylinositol-4,5-bisphosphate 5-phosphatase activity);GO:0004519(endonuclease activity);GO:0004527(exonuclease activity);GO:0005634(nucleus);GO:0046856(phosphatidylinositol dephosphorylation);GO:0046872(metal ion binding)	ko00562(Inositol phosphate metabolism);ko04070(Phosphatidylinositol signaling system)	Y
cca-miR6111-5p_1ss5TG	TCTTGATGTCACGATGTATGAC	down	TRINITY_DN115532_c0_g2	putative receptor-like protein kinase 4 [Helianthus annuus]	5.38	7.12	up	GO:0004674(protein serine/threonine kinase activity);GO:0005886(plasma membrane);GO:0006468(protein phosphorylation)	-	Y
cca-miR6111-5p_1ss5TG	TCTTGATGTCACGATGTATGAC	down	TRINITY_DN115538_c0_g1	S-locus glycoprotein domain-containing protein [Artemisia annua]	23.67	11.52	down	GO:0004674(protein serine/threonine kinase activity);GO:0005886(plasma membrane);GO:0006468(protein phosphorylation)	-	Y
cca-miR6111-5p_1ss5TG	TCTTGATGTCACGATGTATGAC	down	TRINITY_DN122482_c0_g2	tropinone reductase [Artemisia annua]	49.68	54.57	up	GO:0002213(defense response to insect);GO:0004022(alcohol dehydrogenase (NAD) activity);GO:0007568(aging);GO:0009507(chloroplast);GO:0016491(oxidoreductase activity);GO:0055114(oxidation-reduction process)	ko00960(Tropane, piperidine and pyridine alkaloid biosynthesis)	Y
cca-miR6111-5p_1ss5TG	TCTTGATGTCACGATGTATGAC	down	TRINITY_DN123853_c6_g2	chitin elicitor receptor kinase 1 [Chrysanthemum boreale]	7.97	8.25	up	GO:0005515(protein binding);GO:0005775(vacuolar lumen);GO:0005886(plasma membrane);GO:0009609(response to symbiotic bacterium);GO:0009877(nodulation);GO:0016301(kinase activity);GO:0046777(protein autophosphorylation)	ko04626(Plant-pathogen interaction)	Y
cca-miR6111-5p_1ss5TG	TCTTGATGTCACGATGTATGAC	down	TRINITY_DN92301_c0_g3	serine/threonine-protein kinase, active site protein [Artemisia annua]	2.87	2.13	down	-	-	Y
cca-miR6111-5p_1ss5TG	TCTTGATGTCACGATGTATGAC	down	TRINITY_DN94209_c1_g1	heavy metal-associated isoprenylated plant protein 7 [Artemisia annua]	31.03	1.49	down	GO:0005737(cytoplasm);GO:0030001(metal ion transport);GO:0046914(transition metal ion binding);GO:0046916(cellular transition metal ion homeostasis)	-	Y
cca-miR6111-5p_1ss5TG	TCTTGATGTCACGATGTATGAC	down	TRINITY_DN96080_c1_g1	Protein kinase, ATP binding site-containing protein [Artemisia annua]	6.52	1.43	down	GO:0004674(protein serine/threonine kinase activity);GO:0005524(ATP binding);GO:0005886(plasma membrane);GO:0006468(protein phosphorylation);GO:0009506(plasmodesma);GO:0016021(integral component of membrane);GO:0016301(kinase activity)	-	Y
cca-miR6111-5p_1ss5TG	TCTTGATGTCACGATGTATGAC	down	TRINITY_DN96416_c0_g2	hypothetical protein CTI12_AA202600 (chloroplast) [Artemisia annua]	3.41	2.37	down	GO:0004674(protein serine/threonine kinase activity);GO:0005515(protein binding);GO:0005524(ATP binding);GO:0005886(plasma membrane);GO:0006468(protein phosphorylation);GO:0007338(single fertilization);GO:0009860(pollen tube growth);GO:0016021(integral component of membrane);GO:0016301(kinase activity);GO:0016324(apical plasma membrane);GO:0046777(protein autophosphorylation);GO:0090404(pollen tu…	-	Y
cca-miR6111-5p_1ss5TG	TCTTGATGTCACGATGTATGAC	down	TRINITY_DN96937_c2_g2	protein kinase superfamily protein [Artemisia annua]	22.84	11.54	down	GO:0005524(ATP binding);GO:0005634(nucleus);GO:0005886(plasma membrane);GO:0016301(kinase activity)	ko00280(Valine, leucine and isoleucine degradation)	Y
cst-MIR11334-p5_2ss9TG18TC	TAAGGAGTGTGTAACAAC	down	TRINITY_DN102322_c1_g1	hypothetical protein CTI12_AA511600 [Artemisia annua]	9.54	11.18	up	-	-	Y
cst-MIR11334-p5_2ss9TG18TC	TAAGGAGTGTGTAACAAC	down	TRINITY_DN102819_c0_g4	Jacalin domain-containing protein, partial [Cephalotus follicularis]	28.52	7.94	down	GO:0000771(agglutination involved in conjugation);GO:0005536(glucose binding);GO:0005537(mannose binding);GO:0005575(cellular_component)	-	Y
cst-MIR11334-p5_2ss9TG18TC	TAAGGAGTGTGTAACAAC	down	TRINITY_DN104316_c1_g3	serine hydroxymethyltransferase 1, mitochondrial [Lactuca sativa]	161.22	104.3	down	GO:0004372(glycine hydroxymethyltransferase activity);GO:0005515(protein binding);GO:0005634(nucleus);GO:0005739(mitochondrion);GO:0005759(mitochondrial matrix);GO:0005829(cytosol);GO:0005886(plasma membrane);GO:0006544(glycine metabolic process);GO:0006563(L-serine metabolic process);GO:0007623(circadian rhythm);GO:0008266(poly(U) RNA binding);GO:0009409(response to cold);GO:0009416(response to …	ko00630(Glyoxylate and dicarboxylate metabolism);ko00260(Glycine, serine and threonine metabolism);ko00460(Cyanoamino acid metabolism);ko00670(One carbon pool by folate)	Y
cst-MIR11334-p5_2ss9TG18TC	TAAGGAGTGTGTAACAAC	down	TRINITY_DN106323_c0_g1	nucleotide-rhamnose synthase/epimerase-reductase [Artemisia annua]	57.51	40.18	down	GO:0005829(cytosol);GO:0005886(plasma membrane);GO:0008830(dTDP-4-dehydrorhamnose 3,5-epimerase activity);GO:0008831(dTDP-4-dehydrorhamnose reductase activity);GO:0009506(plasmodesma);GO:0010253(UDP-rhamnose biosynthetic process);GO:0010489(UDP-4-keto-6-deoxy-glucose-3,5-epimerase activity);GO:0010490(UDP-4-keto-rhamnose-4-keto-reductase activity);GO:0019305(dTDP-rhamnose biosynthetic process);GO…	ko00520(Amino sugar and nucleotide sugar metabolism);ko00523(Polyketide sugar unit biosynthesis)	Y
cst-MIR11334-p5_2ss9TG18TC	TAAGGAGTGTGTAACAAC	down	TRINITY_DN107672_c0_g1	HECT domain, Ubiquitin, Ubiquitin-related domain protein [Artemisia annua]	9.15	7.89	down	GO:0004842(ubiquitin-protein transferase activity);GO:0005634(nucleus);GO:0005737(cytoplasm)	ko04120(Ubiquitin mediated proteolysis);ko04144(Endocytosis)	Y
cst-MIR11334-p5_2ss9TG18TC	TAAGGAGTGTGTAACAAC	down	TRINITY_DN107714_c0_g1	HCO3- transporter family [Artemisia annua]	9.52	1.9	down	GO:0005887(integral component of plasma membrane);GO:0008509(anion transmembrane transporter activity);GO:0051453(regulation of intracellular pH);GO:0098656(anion transmembrane transport)	-	Y
cst-MIR11334-p5_2ss9TG18TC	TAAGGAGTGTGTAACAAC	down	TRINITY_DN109010_c0_g1	major facilitator superfamily protein [Artemisia annua]	0.9	3	up	GO:0005351(carbohydrate:proton symporter activity);GO:0005739(mitochondrion);GO:0015144(carbohydrate transmembrane transporter activity);GO:0016020(membrane);GO:0016021(integral component of membrane);GO:0055085(transmembrane transport)	-	Y
cst-MIR11334-p5_2ss9TG18TC	TAAGGAGTGTGTAACAAC	down	TRINITY_DN109661_c1_g1	voltage dependent anion channel 2 [Artemisia annua]	23.16	16.37	down	GO:0005739(mitochondrion);GO:0005741(mitochondrial outer membrane);GO:0006811(ion transport);GO:0006820(anion transport);GO:0008308(voltage-gated anion channel activity);GO:0015288(porin activity);GO:0046930(pore complex);GO:0055085(transmembrane transport)	-	Y
cst-MIR11334-p5_2ss9TG18TC	TAAGGAGTGTGTAACAAC	down	TRINITY_DN113282_c1_g1	starch synthase, catalytic domain-containing protein [Artemisia annua]	5.64	13.14	up	GO:0009011(starch synthase activity);GO:0009507(chloroplast)	ko00500(Starch and sucrose metabolism)	Y
cst-MIR11334-p5_2ss9TG18TC	TAAGGAGTGTGTAACAAC	down	TRINITY_DN114912_c0_g2	6-phosphogluconate dehydrogenase, decarboxylating 2, chloroplastic isoform X1 [Helianthus annuus]	19.84	10.06	down	GO:0004616(phosphogluconate dehydrogenase (decarboxylating) activity);GO:0005515(protein binding);GO:0005737(cytoplasm);GO:0005829(cytosol);GO:0008114(phosphogluconate 2-dehydrogenase activity);GO:0009051(pentose-phosphate shunt, oxidative branch);GO:0009507(chloroplast);GO:0009536(plastid);GO:0009570(chloroplast stroma);GO:0009651(response to salt stress);GO:0016020(membrane);GO:0019521(D-glucon…	ko00030(Pentose phosphate pathway);ko00480(Glutathione metabolism)	Y
cst-MIR11334-p5_2ss9TG18TC	TAAGGAGTGTGTAACAAC	down	TRINITY_DN115040_c1_g3	triose phosphate/phosphate translocator, non-green plastid protein [Artemisia annua]	9.84	12.07	up	GO:0034219(carbohydrate transmembrane transport)	-	Y
cst-MIR11334-p5_2ss9TG18TC	TAAGGAGTGTGTAACAAC	down	TRINITY_DN115244_c1_g3	hypothetical protein CTI12_AA166760 [Artemisia annua]	11.11	9.78	down	GO:0003674(molecular_function);GO:0005634(nucleus);GO:0008150(biological_process)	-	Y
cst-MIR11334-p5_2ss9TG18TC	TAAGGAGTGTGTAACAAC	down	TRINITY_DN115425_c0_g1	rhomboid-related intramembrane serine protease family protein [Artemisia annua]	53.05	38.6	down	GO:0004252(serine-type endopeptidase activity);GO:0016485(protein processing)	-	Y
cst-MIR11334-p5_2ss9TG18TC	TAAGGAGTGTGTAACAAC	down	TRINITY_DN115630_c2_g1	NB-ARC domains-containing protein [Artemisia annua]	8.35	4.77	down	-	-	Y
cst-MIR11334-p5_2ss9TG18TC	TAAGGAGTGTGTAACAAC	down	TRINITY_DN115848_c0_g1	exocyst complex component SEC5 [Artemisia annua]	9.98	11.18	up	GO:0000145(exocyst);GO:0001927(exocyst assembly)	-	Y
cst-MIR11334-p5_2ss9TG18TC	TAAGGAGTGTGTAACAAC	down	TRINITY_DN116164_c0_g3	S-adenosylmethionine decarboxylase [Artemisia annua]	62.1	40	down	GO:0004014(adenosylmethionine decarboxylase activity);GO:0005829(cytosol);GO:0006597(spermine biosynthetic process);GO:0008295(spermidine biosynthetic process)	ko00270(Cysteine and methionine metabolism);ko00330(Arginine and proline metabolism)	Y
cst-MIR11334-p5_2ss9TG18TC	TAAGGAGTGTGTAACAAC	down	TRINITY_DN116266_c1_g3	-	10.77	15.24	up	-	-	Y
cst-MIR11334-p5_2ss9TG18TC	TAAGGAGTGTGTAACAAC	down	TRINITY_DN116416_c0_g1	delta tonoplast integral protein [Artemisia annua]	409.88	83.21	down	GO:0005887(integral component of plasma membrane);GO:0009705(plant-type vacuole membrane);GO:0009992(cellular water homeostasis);GO:0015250(water channel activity);GO:0015254(glycerol channel activity);GO:0034220(ion transmembrane transport);GO:0042807(central vacuole)	-	Y
cst-MIR11334-p5_2ss9TG18TC	TAAGGAGTGTGTAACAAC	down	TRINITY_DN118502_c1_g1	transducin/WD40 repeat-like superfamily protein [Artemisia annua]	2.15	6.64	up	GO:0005730(nucleolus);GO:0030687(preribosome, large subunit precursor);GO:0042273(ribosomal large subunit biogenesis)	-	Y
cst-MIR11334-p5_2ss9TG18TC	TAAGGAGTGTGTAACAAC	down	TRINITY_DN119484_c1_g1	farnesyl diphosphate synthase [Chrysanthemum lavandulifolium]	31.74	13.18	down	GO:0004161(dimethylallyltranstransferase activity);GO:0004337(geranyltranstransferase activity);GO:0005737(cytoplasm);GO:0045337(farnesyl diphosphate biosynthetic process)	ko00900(Terpenoid backbone biosynthesis)	Y
cst-MIR11334-p5_2ss9TG18TC	TAAGGAGTGTGTAACAAC	down	TRINITY_DN119837_c1_g8	Dihydrolipoamide dehydrogenase [Cynara cardunculus var. scolymus]	26.52	14.45	down	GO:0004148(dihydrolipoyl dehydrogenase activity);GO:0005739(mitochondrion)	ko00010(Glycolysis / Gluconeogenesis);ko00020(Citrate cycle (TCA cycle));ko00620(Pyruvate metabolism);ko00630(Glyoxylate and dicarboxylate metabolism);ko00640(Propanoate metabolism);ko00260(Glycine, serine and threonine metabolism);ko00280(Valine, leucine and isoleucine degradation)	Y
cst-MIR11334-p5_2ss9TG18TC	TAAGGAGTGTGTAACAAC	down	TRINITY_DN120038_c0_g1	flavonoid 3'-monooxygenase [Artemisia annua]	3.42	2.04	down	GO:0016020(membrane);GO:0016709(oxidoreductase activity, acting on paired donors, with incorporation or reduction of molecular oxygen, NAD(P)H as one donor, and incorporation of one atom of oxygen);GO:0044550(secondary metabolite biosynthetic process)	ko00905(Brassinosteroid biosynthesis)	Y
cst-MIR11334-p5_2ss9TG18TC	TAAGGAGTGTGTAACAAC	down	TRINITY_DN120170_c2_g2	ubiquitin-specific protease 22 [Artemisia annua]	7.35	5.62	down	GO:0004843(thiol-dependent ubiquitin-specific protease activity);GO:0005634(nucleus);GO:0006511(ubiquitin-dependent protein catabolic process);GO:0008270(zinc ion binding);GO:0016579(protein deubiquitination);GO:0036459(thiol-dependent ubiquitinyl hydrolase activity)	-	Y
cst-MIR11334-p5_2ss9TG18TC	TAAGGAGTGTGTAACAAC	down	TRINITY_DN120179_c2_g1	alpha/Beta hydrolase fold protein [Artemisia annua]	4.69	9.08	up	-	-	Y
cst-MIR11334-p5_2ss9TG18TC	TAAGGAGTGTGTAACAAC	down	TRINITY_DN120892_c0_g1	ABC-2 type transporter family protein [Artemisia annua]	22.68	37.79	up	GO:0005886(plasma membrane);GO:0016021(integral component of membrane);GO:0042626(ATPase activity, coupled to transmembrane movement of substances)	ko02010(ABC transporters)	Y
cst-MIR11334-p5_2ss9TG18TC	TAAGGAGTGTGTAACAAC	down	TRINITY_DN121175_c2_g2	hypothetical protein CTI12_AA354370 [Artemisia annua]	12.08	53.85	up	GO:0003674(molecular_function);GO:0005634(nucleus);GO:0008150(biological_process)	-	Y
cst-MIR11334-p5_2ss9TG18TC	TAAGGAGTGTGTAACAAC	down	TRINITY_DN121259_c0_g1	glutamyl-tRNA(Gln) amidotransferase subunit B [Artemisia annua]	13.83	8.65	down	GO:0032543(mitochondrial translation);GO:0050567(glutaminyl-tRNA synthase (glutamine-hydrolyzing) activity);GO:0070681(glutaminyl-tRNAGln biosynthesis via transamidation)	ko00970(Aminoacyl-tRNA biosynthesis)	Y
cst-MIR11334-p5_2ss9TG18TC	TAAGGAGTGTGTAACAAC	down	TRINITY_DN121489_c2_g2	DNA-binding WRKY [Artemisia annua]	2.09	3.75	up	-	-	Y
cst-MIR11334-p5_2ss9TG18TC	TAAGGAGTGTGTAACAAC	down	TRINITY_DN121679_c2_g1	aldehyde dehydrogenase family 7 member B4 [Artemisia annua]	17.02	40.47	up	GO:0004029(aldehyde dehydrogenase (NAD) activity)	ko00010(Glycolysis / Gluconeogenesis);ko00053(Ascorbate and aldarate metabolism);ko00620(Pyruvate metabolism);ko00071(Fatty acid degradation);ko00561(Glycerolipid metabolism);ko00260(Glycine, serine and threonine metabolism);ko00280(Valine, leucine and isoleucine degradation);ko00310(Lysine degradation);ko00330(Arginine and proline metabolism);ko00340(Histidine metabolism);ko00380(Tryptophan meta…	Y
cst-MIR11334-p5_2ss9TG18TC	TAAGGAGTGTGTAACAAC	down	TRINITY_DN122125_c1_g2	hypothetical protein CTI12_AA081280 [Artemisia annua]	15.04	11.02	down	GO:0034975(protein folding in endoplasmic reticulum);GO:0072546(ER membrane protein complex)	-	Y
cst-MIR11334-p5_2ss9TG18TC	TAAGGAGTGTGTAACAAC	down	TRINITY_DN123165_c1_g3	cullin [Artemisia annua]	28.22	34.04	up	GO:0031461(cullin-RING ubiquitin ligase complex);GO:0031625(ubiquitin protein ligase binding);GO:0061630(ubiquitin protein ligase activity)	ko04141(Protein processing in endoplasmic reticulum);ko04120(Ubiquitin mediated proteolysis)	Y
cst-MIR11334-p5_2ss9TG18TC	TAAGGAGTGTGTAACAAC	down	TRINITY_DN123343_c5_g1	hypothetical protein CTI12_AA510830 [Artemisia annua]	3.5	3.77	up	-	-	Y
cst-MIR11334-p5_2ss9TG18TC	TAAGGAGTGTGTAACAAC	down	TRINITY_DN124499_c5_g2	-	11.83	19.91	up	-	-	Y
cst-MIR11334-p5_2ss9TG18TC	TAAGGAGTGTGTAACAAC	down	TRINITY_DN124838_c5_g1	mono-/di-acylglycerol lipase,Lipase, class 3 [Artemisia annua]	2.93	2.99	up	GO:0004806(triglyceride lipase activity);GO:0005886(plasma membrane);GO:0006629(lipid metabolic process);GO:0016042(lipid catabolic process);GO:0016787(hydrolase activity)	-	Y
cst-MIR11334-p5_2ss9TG18TC	TAAGGAGTGTGTAACAAC	down	TRINITY_DN124859_c6_g1	aminophospholipid ATPase 3 [Artemisia annua]	3.95	3.31	down	GO:0004012(phospholipid-translocating ATPase activity);GO:0005802(trans-Golgi network);GO:0005886(plasma membrane);GO:0048194(Golgi vesicle budding)	-	Y
cst-MIR11334-p5_2ss9TG18TC	TAAGGAGTGTGTAACAAC	down	TRINITY_DN125282_c9_g5	zinc finger, RING-CH-type, Zinc finger, RING/FYVE/PHD-type [Artemisia annua]	7.72	4.82	down	GO:0005737(cytoplasm);GO:0005886(plasma membrane);GO:0008270(zinc ion binding);GO:0071470(cellular response to osmotic stress);GO:0071472(cellular response to salt stress)	ko04141(Protein processing in endoplasmic reticulum)	Y
cst-MIR11334-p5_2ss9TG18TC	TAAGGAGTGTGTAACAAC	down	TRINITY_DN88071_c0_g3	Serine hydroxymethyltransferase 1, mitochondrial [Artemisia annua]	11.12	7.05	down	GO:0004372(glycine hydroxymethyltransferase activity);GO:0005515(protein binding);GO:0005634(nucleus);GO:0005739(mitochondrion);GO:0005759(mitochondrial matrix);GO:0005829(cytosol);GO:0005886(plasma membrane);GO:0006544(glycine metabolic process);GO:0006563(L-serine metabolic process);GO:0007623(circadian rhythm);GO:0008266(poly(U) RNA binding);GO:0009409(response to cold);GO:0009416(response to …	ko00630(Glyoxylate and dicarboxylate metabolism);ko00260(Glycine, serine and threonine metabolism);ko00460(Cyanoamino acid metabolism);ko00670(One carbon pool by folate)	Y
cst-MIR11334-p5_2ss9TG18TC	TAAGGAGTGTGTAACAAC	down	TRINITY_DN96568_c0_g1	peptide methionine sulfoxide reductase B1, chloroplastic [Cynara cardunculus var. scolymus]	99.73	14.62	down	GO:0006979(response to oxidative stress);GO:0009507(chloroplast);GO:0009570(chloroplast stroma);GO:0030091(protein repair);GO:0033743(peptide-methionine (R)-S-oxide reductase activity);GO:0046872(metal ion binding);GO:0055114(oxidation-reduction process)	-	Y
cst-MIR11334-p5_2ss9TG18TC	TAAGGAGTGTGTAACAAC	down	TRINITY_DN97399_c0_g1	NAD(P)-binding Rossmann-fold superfamily protein [Artemisia annua]	4.88	2.23	down	GO:0003854(3-beta-hydroxy-delta5-steroid dehydrogenase activity);GO:0005783(endoplasmic reticulum);GO:0006694(steroid biosynthetic process);GO:0016021(integral component of membrane);GO:0055114(oxidation-reduction process)	-	Y
cst-MIR11334-p5_2ss9TG18TC	TAAGGAGTGTGTAACAAC	down	TRINITY_DN98576_c1_g4	-	1.06	5.28	up	-	-	Y
cst-MIR11334-p5_2ss9TG18TC	TAAGGAGTGTGTAACAAC	down	TRINITY_DN98820_c0_g1	zinc finger, RING/FYVE/PHD-type [Artemisia annua]	12.02	8.72	down	GO:0005634(nucleus)	ko04141(Protein processing in endoplasmic reticulum)	Y
cst-MIR11334-p5_2ss9TG18TC	TAAGGAGTGTGTAACAAC	down	TRINITY_DN99766_c0_g2	peptidase C1A [Artemisia annua]	3.82	0.82	down	GO:0004197(cysteine-type endopeptidase activity);GO:0005615(extracellular space);GO:0005764(lysosome);GO:0051603(proteolysis involved in cellular protein catabolic process)	-	Y
aly-miR393a-5p	TCCAAAGGGATCGCATTGATCC	down	TRINITY_DN121327_c1_g1	transport inhibitor response 1-like protein [Artemisia annua]	7.47	7.82	up	GO:0000151(ubiquitin ligase complex);GO:0000822(inositol hexakisphosphate binding);GO:0004842(ubiquitin-protein transferase activity);GO:0005515(protein binding);GO:0005634(nucleus);GO:0006511(ubiquitin-dependent protein catabolic process);GO:0006952(defense response);GO:0007049(cell cycle);GO:0009733(response to auxin);GO:0009734(auxin-activated signaling pathway);GO:0009873(ethylene-activated s…	ko04075(Plant hormone signal transduction)	Y
aly-miR393a-5p	TCCAAAGGGATCGCATTGATCC	down	TRINITY_DN121513_c0_g1	transport inhibitor response 1-like protein [Artemisia annua]	16.69	14.44	down	GO:0000822(inositol hexakisphosphate binding);GO:0009734(auxin-activated signaling pathway)	ko04075(Plant hormone signal transduction)	Y

## Sheet: root
miR_name	miR_seq	regulation	Accession	annotation	FPKM.SCK_R(mean)	FPKM.S200_R(mean)	regulation	go	kegg
PC-3p-1384_3922	TCCACTCTGCTTTCTCTGAGGT	up	TRINITY_DN103024_c0_g2	Ankyrin repeat-containing protein [Artemisia annua]	3.11	2.37	down	GO:0007165(signal transduction);GO:0016020(membrane)	-	Y
PC-3p-1384_3922	TCCACTCTGCTTTCTCTGAGGT	up	TRINITY_DN103461_c1_g3	protein kinase superfamily protein [Artemisia annua]	11.44	13.92	up	GO:0004674(protein serine/threonine kinase activity);GO:0005622(intracellular);GO:0018105(peptidyl-serine phosphorylation);GO:0035556(intracellular signal transduction)	-	Y
PC-3p-1384_3922	TCCACTCTGCTTTCTCTGAGGT	up	TRINITY_DN103588_c0_g1	glycine-rich protein 2 [Artemisia annua]	758.02	724.07	down	GO:0004477(methenyltetrahydrofolate cyclohydrolase activity);GO:0004488(methylenetetrahydrofolate dehydrogenase (NADP+) activity);GO:0005829(cytosol);GO:0006730(one-carbon metabolic process)	-	Y
PC-3p-1384_3922	TCCACTCTGCTTTCTCTGAGGT	up	TRINITY_DN104019_c0_g1	O-fucosyltransferase family protein [Artemisia annua]	16.78	18.64	up	GO:0005794(Golgi apparatus);GO:0006004(fucose metabolic process);GO:0006486(protein glycosylation);GO:0016021(integral component of membrane);GO:0016757(transferase activity, transferring glycosyl groups)	-	Y
PC-3p-1384_3922	TCCACTCTGCTTTCTCTGAGGT	up	TRINITY_DN105517_c1_g1	ABRE binding factor 4 [Artemisia annua]	33.76	33.08	down	GO:0000976(transcription regulatory region sequence-specific DNA binding);GO:0000977(RNA polymerase II regulatory region sequence-specific DNA binding);GO:0003677(DNA binding);GO:0003700(DNA binding transcription factor activity);GO:0005515(protein binding);GO:0005634(nucleus);GO:0006351(transcription, DNA-templated);GO:0006355(regulation of transcription, DNA-templated);GO:0009414(response to wa…	ko04075(Plant hormone signal transduction)	Y
PC-3p-1384_3922	TCCACTCTGCTTTCTCTGAGGT	up	TRINITY_DN105681_c0_g1	HSP20-like chaperone [Artemisia annua]	315.83	281.12	down	GO:0003674(molecular_function);GO:0005634(nucleus);GO:0005737(cytoplasm);GO:0005829(cytosol);GO:0005886(plasma membrane);GO:0009506(plasmodesma);GO:0010449(root meristem growth);GO:0010628(positive regulation of gene expression);GO:0080037(negative regulation of cytokinin-activated signaling pathway);GO:2000012(regulation of auxin polar transport)	ko00590(Arachidonic acid metabolism)	Y
PC-3p-1384_3922	TCCACTCTGCTTTCTCTGAGGT	up	TRINITY_DN106268_c1_g1	hypothetical protein CTI12_AA424720 [Artemisia annua]	34.69	26.5	down	GO:0003677(DNA binding);GO:0003700(DNA binding transcription factor activity);GO:0005634(nucleus);GO:0006351(transcription, DNA-templated);GO:0006355(regulation of transcription, DNA-templated);GO:0009873(ethylene-activated signaling pathway)	-	Y
PC-3p-1384_3922	TCCACTCTGCTTTCTCTGAGGT	up	TRINITY_DN111820_c0_g1	PPM-type phosphatase domain, Protein phosphatase 2C family [Artemisia annua]	78.1	24.16	down	GO:0004722(protein serine/threonine phosphatase activity);GO:0005515(protein binding);GO:0005886(plasma membrane);GO:0006470(protein dephosphorylation);GO:0009414(response to water deprivation);GO:0045926(negative regulation of growth);GO:0046872(metal ion binding);GO:1904526(regulation of microtubule binding)	-	Y
PC-3p-1384_3922	TCCACTCTGCTTTCTCTGAGGT	up	TRINITY_DN113909_c0_g2	CD2-binding protein-related protein [Artemisia annua]	13.61	14.01	up	GO:0005682(U5 snRNP)	-	Y
PC-3p-1384_3922	TCCACTCTGCTTTCTCTGAGGT	up	TRINITY_DN117412_c0_g1	phosphate 2 [Artemisia annua]	58.38	46.89	down	GO:0005737(cytoplasm);GO:0031625(ubiquitin protein ligase binding);GO:0061630(ubiquitin protein ligase activity)	ko04120(Ubiquitin mediated proteolysis)	Y
PC-3p-1384_3922	TCCACTCTGCTTTCTCTGAGGT	up	TRINITY_DN118068_c0_g1	nucleosome assembly protein 1-like 4 [Artemisia annua]	45.72	34.78	down	GO:0000724(double-strand break repair via homologous recombination);GO:0003677(DNA binding);GO:0005515(protein binding);GO:0005634(nucleus);GO:0005737(cytoplasm);GO:0005829(cytosol);GO:0005886(plasma membrane);GO:0006281(DNA repair);GO:0006334(nucleosome assembly);GO:0008283(cell proliferation);GO:0016444(somatic cell DNA recombination);GO:0030154(cell differentiation);GO:0042393(histone binding)	-	Y
PC-3p-1384_3922	TCCACTCTGCTTTCTCTGAGGT	up	TRINITY_DN119289_c3_g1	serine/threonine-protein phosphatase 4 [Artemisia annua]	10.52	10.68	down	-	-	Y
PC-3p-1384_3922	TCCACTCTGCTTTCTCTGAGGT	up	TRINITY_DN121831_c1_g2	polycomb protein, VEFS-Box [Artemisia annua]	5.4	7.76	up	GO:0003677(DNA binding);GO:0003700(DNA binding transcription factor activity);GO:0005515(protein binding);GO:0005634(nucleus);GO:0006349(regulation of gene expression by genetic imprinting);GO:0006351(transcription, DNA-templated);GO:0006355(regulation of transcription, DNA-templated);GO:0009908(flower development);GO:0009910(negative regulation of flower development);GO:0030154(cell differentiat…	-	Y
PC-3p-1384_3922	TCCACTCTGCTTTCTCTGAGGT	up	TRINITY_DN87968_c0_g2	delta(24)-sterol reductase [Artemisia annua]	16.11	10.96	down	GO:0008202(steroid metabolic process)	ko00100(Steroid biosynthesis)	Y
PC-3p-1384_3922	TCCACTCTGCTTTCTCTGAGGT	up	TRINITY_DN94383_c0_g1	-	20.97	19.32	down	-	-	Y
PC-3p-1384_3922	TCCACTCTGCTTTCTCTGAGGT	up	TRINITY_DN95479_c0_g2	ubiquitin-conjugating enzyme/RWD-like protein [Artemisia annua]	6.67	4.15	down	GO:0005634(nucleus);GO:0005737(cytoplasm);GO:0016925(protein sumoylation);GO:0019789(SUMO transferase activity);GO:0031625(ubiquitin protein ligase binding);GO:0061630(ubiquitin protein ligase activity)	ko03013(RNA transport);ko04120(Ubiquitin mediated proteolysis)	Y
PC-3p-153871_47	TGGCTCATAAGTCTCTAACTTG	up	TRINITY_DN110261_c1_g5	AAA-type ATPase family protein [Artemisia annua]	34.74	24.67	down	GO:0005795(Golgi stack);GO:0006891(intra-Golgi vesicle-mediated transport);GO:0016887(ATPase activity);GO:0043001(Golgi to plasma membrane protein transport);GO:0048211(Golgi vesicle docking)	-	Y
PC-3p-153871_47	TGGCTCATAAGTCTCTAACTTG	up	TRINITY_DN111193_c0_g2	alpha/Beta hydrolase fold protein [Artemisia annua]	10.66	5.99	down	GO:0005634(nucleus);GO:0005829(cytosol);GO:0009056(catabolic process);GO:0052689(carboxylic ester hydrolase activity)	-	Y
PC-3p-153871_47	TGGCTCATAAGTCTCTAACTTG	up	TRINITY_DN117245_c0_g1	P-type ATPase [Artemisia annua]	40.02	34.1	down	GO:0005887(integral component of plasma membrane);GO:0008553(proton-exporting ATPase activity, phosphorylative mechanism);GO:0043231(intracellular membrane-bounded organelle);GO:0051453(regulation of intracellular pH);GO:1902600(proton transmembrane transport)	ko00190(Oxidative phosphorylation)	Y
PC-3p-153871_47	TGGCTCATAAGTCTCTAACTTG	up	TRINITY_DN117322_c0_g1	UDP-Glycosyltransferase superfamily protein [Artemisia annua]	7.81	2.54	down	GO:0008194(UDP-glycosyltransferase activity);GO:0009813(flavonoid biosynthetic process);GO:0043231(intracellular membrane-bounded organelle);GO:0052696(flavonoid glucuronidation)	-	Y
PC-3p-153871_47	TGGCTCATAAGTCTCTAACTTG	up	TRINITY_DN119428_c1_g2	GDP-mannose 3,5-epimerase 2 [Helianthus annuus]	120.65	91.52	down	GO:0003824(catalytic activity);GO:0005737(cytoplasm);GO:0005829(cytosol);GO:0009225(nucleotide-sugar metabolic process);GO:0019853(L-ascorbic acid biosynthetic process);GO:0047918(GDP-mannose 3,5-epimerase activity);GO:0051287(NAD binding)	ko00053(Ascorbate and aldarate metabolism);ko00520(Amino sugar and nucleotide sugar metabolism)	Y
PC-3p-153871_47	TGGCTCATAAGTCTCTAACTTG	up	TRINITY_DN120192_c3_g3	-	18.02	11.86	down	-	-	Y
PC-3p-153871_47	TGGCTCATAAGTCTCTAACTTG	up	TRINITY_DN121660_c0_g1	Homeodomain-like protein [Artemisia annua]	18.62	17.74	down	GO:0003700(DNA binding transcription factor activity);GO:0005634(nucleus);GO:0006355(regulation of transcription, DNA-templated);GO:0043565(sequence-specific DNA binding)	-	Y
PC-3p-153871_47	TGGCTCATAAGTCTCTAACTTG	up	TRINITY_DN123839_c3_g1	wound-responsive family protein [Artemisia annua]	12.65	14.21	up	GO:0005634(nucleus);GO:0009611(response to wounding)	-	Y
PC-3p-613_8603	TTTAAGTAGTGGACAATTGGA	up	TRINITY_DN104483_c1_g1	glutamate decarboxylase [Artemisia annua]	117.27	104.07	down	GO:0004351(glutamate decarboxylase activity);GO:0005516(calmodulin binding);GO:0005829(cytosol);GO:0006536(glutamate metabolic process);GO:0030170(pyridoxal phosphate binding);GO:0046686(response to cadmium ion)	ko00650(Butanoate metabolism);ko00250(Alanine, aspartate and glutamate metabolism);ko00410(beta-Alanine metabolism);ko00430(Taurine and hypotaurine metabolism)	Y
PC-3p-613_8603	TTTAAGTAGTGGACAATTGGA	up	TRINITY_DN107595_c0_g1	glucose/ribitol dehydrogenase [Artemisia annua]	26.66	48.42	up	GO:0005737(cytoplasm);GO:0009505(plant-type cell wall);GO:0016491(oxidoreductase activity)	ko00902(Monoterpenoid biosynthesis)	Y
PC-3p-613_8603	TTTAAGTAGTGGACAATTGGA	up	TRINITY_DN112232_c0_g1	zinc finger, RING/FYVE/PHD-type [Artemisia annua]	6.04	5.86	down	GO:0043161(proteasome-mediated ubiquitin-dependent protein catabolic process);GO:0061630(ubiquitin protein ligase activity)	-	Y
PC-3p-613_8603	TTTAAGTAGTGGACAATTGGA	up	TRINITY_DN112423_c1_g1	transcription factor MYB44-like protein [Artemisia annua]	28.16	16.81	down	-	-	Y
PC-3p-613_8603	TTTAAGTAGTGGACAATTGGA	up	TRINITY_DN113461_c2_g2	F-box/FBD/LRR-repeat protein At1g13570-like isoform X1 [Helianthus annuus]	6.34	8.59	up	-	-	Y
PC-3p-613_8603	TTTAAGTAGTGGACAATTGGA	up	TRINITY_DN114150_c0_g2	26S protease regulatory subunit 10B [Artemisia annua]	46.85	31.09	down	GO:0008540(proteasome regulatory particle, base subcomplex);GO:0017025(TBP-class protein binding);GO:0030433(ubiquitin-dependent ERAD pathway);GO:0031595(nuclear proteasome complex);GO:0031597(cytosolic proteasome complex);GO:0036402(proteasome-activating ATPase activity);GO:0045899(positive regulation of RNA polymerase II transcriptional preinitiation complex assembly)	ko03050(Proteasome)	Y
PC-3p-613_8603	TTTAAGTAGTGGACAATTGGA	up	TRINITY_DN115298_c0_g1	glyceraldehyde-3-phosphate dehydrogenase GAPCP1, chloroplastic-like [Helianthus annuus]	22.25	29.24	up	GO:0004365(glyceraldehyde-3-phosphate dehydrogenase (NAD+) (phosphorylating) activity);GO:0005507(copper ion binding);GO:0005975(carbohydrate metabolic process);GO:0006006(glucose metabolic process);GO:0006096(glycolytic process);GO:0008270(zinc ion binding);GO:0009507(chloroplast);GO:0009536(plastid);GO:0009555(pollen development);GO:0009570(chloroplast stroma);GO:0009735(response to cytokinin);…	ko00010(Glycolysis / Gluconeogenesis);ko00710(Carbon fixation in photosynthetic organisms)	Y
PC-3p-613_8603	TTTAAGTAGTGGACAATTGGA	up	TRINITY_DN118226_c0_g1	hypothetical protein CTI12_AA397110 [Artemisia annua]	10.56	13.65	up	GO:0005381(iron ion transmembrane transporter activity);GO:0005384(manganese ion transmembrane transporter activity);GO:0005783(endoplasmic reticulum);GO:0006880(intracellular sequestering of iron ion);GO:0010168(ER body);GO:0016020(membrane);GO:0030026(cellular manganese ion homeostasis);GO:0071281(cellular response to iron ion);GO:0071421(manganese ion transmembrane transport)	-	Y
PC-3p-613_8603	TTTAAGTAGTGGACAATTGGA	up	TRINITY_DN118614_c1_g1	RNA-directed DNA methylation 4 [Artemisia annua]	10.72	16.7	up	GO:0003700(DNA binding transcription factor activity);GO:0005634(nucleus);GO:0006306(DNA methylation);GO:0006342(chromatin silencing);GO:0006355(regulation of transcription, DNA-templated);GO:0009791(post-embryonic development);GO:0031047(gene silencing by RNA);GO:0032502(developmental process)	-	Y
PC-3p-613_8603	TTTAAGTAGTGGACAATTGGA	up	TRINITY_DN121530_c1_g2	linoleate 9S-lipoxygenase A [Artemisia annua]	10.27	6.37	down	GO:0016165(linoleate 13S-lipoxygenase activity)	ko00591(Linoleic acid metabolism)	Y
PC-3p-613_8603	TTTAAGTAGTGGACAATTGGA	up	TRINITY_DN121928_c0_g1	Leucine-rich repeat-containing protein [Artemisia annua]	5.96	7.22	up	GO:0001653(peptide receptor activity);GO:0004674(protein serine/threonine kinase activity);GO:0004714(transmembrane receptor protein tyrosine kinase activity);GO:0005515(protein binding);GO:0005524(ATP binding);GO:0005886(plasma membrane);GO:0010051(xylem and phloem pattern formation);GO:0010311(lateral root formation);GO:0016021(integral component of membrane);GO:0016301(kinase activity);GO:0017…	-	Y
PC-3p-613_8603	TTTAAGTAGTGGACAATTGGA	up	TRINITY_DN98471_c1_g2	rlpA-like double-psi beta-barrel domain-containing protein [Artemisia annua]	5.11	11.2	up	-	-	Y
PC-3p-613_8603	TTTAAGTAGTGGACAATTGGA	up	TRINITY_DN98471_c1_g6	rlpA-like double-psi beta-barrel domain-containing protein [Artemisia annua]	16.31	28.47	up	-	-	Y
PC-3p-613_8603	TTTAAGTAGTGGACAATTGGA	up	TRINITY_DN98652_c0_g2	-	6.92	7.42	down	-	-	Y
PC-3p-613_8603	TTTAAGTAGTGGACAATTGGA	up	TRINITY_DN99254_c0_g2	BTB/POZ-like protein [Artemisia annua]	6.06	61.54	up	-	-	Y
PC-5p-838_6216	TAAACCTATCTATAACAACCT	down	TRINITY_DN100620_c0_g1	trihelix protein, partial [Chrysanthemum x morifolium]	7.62	6.79	down	GO:0003700(DNA binding transcription factor activity);GO:0005634(nucleus);GO:0006355(regulation of transcription, DNA-templated);GO:0019760(glucosinolate metabolic process);GO:0043565(sequence-specific DNA binding);GO:0044212(transcription regulatory region DNA binding)	-	Y
PC-5p-838_6216	TAAACCTATCTATAACAACCT	down	TRINITY_DN102026_c0_g1	transducin/WD40 repeat-like superfamily protein [Artemisia annua]	14.75	12.14	down	GO:0000166(nucleotide binding);GO:0000460(maturation of 5.8S rRNA);GO:0000470(maturation of LSU-rRNA);GO:0005515(protein binding);GO:0005634(nucleus);GO:0005654(nucleoplasm);GO:0005730(nucleolus);GO:0005829(cytosol);GO:0005834(heterotrimeric G-protein complex);GO:0009506(plasmodesma);GO:0030687(preribosome, large subunit precursor);GO:0070545(PeBoW complex);GO:0080008(Cul4-RING E3 ubiquitin ligas…	-	Y
PC-5p-838_6216	TAAACCTATCTATAACAACCT	down	TRINITY_DN102268_c1_g1	-	12.23	12.97	down	-	-	Y
PC-5p-838_6216	TAAACCTATCTATAACAACCT	down	TRINITY_DN102923_c1_g1	P-loop containing nucleoside triphosphate hydrolases superfamily protein [Artemisia annua]	16.17	19.45	up	GO:0004017(adenylate kinase activity);GO:0005524(ATP binding);GO:0005739(mitochondrion);GO:0046939(nucleotide phosphorylation)	ko00230(Purine metabolism);ko00730(Thiamine metabolism)	Y
PC-5p-838_6216	TAAACCTATCTATAACAACCT	down	TRINITY_DN103519_c0_g1	uncharacterized protein LOC100804207 [Glycine max]	6.48	4.05	down	GO:0003674(molecular_function);GO:0005773(vacuole);GO:0008150(biological_process);GO:0009507(chloroplast)	-	Y
PC-5p-838_6216	TAAACCTATCTATAACAACCT	down	TRINITY_DN103969_c0_g1	recA DNA recombination family protein [Artemisia annua]	4.63	5.39	up	GO:0000150(recombinase activity);GO:0000400(four-way junction DNA binding);GO:0000730(DNA recombinase assembly);GO:0003690(double-stranded DNA binding);GO:0003697(single-stranded DNA binding);GO:0004520(endodeoxyribonuclease activity);GO:0006312(mitotic recombination);GO:0008094(DNA-dependent ATPase activity);GO:0010212(response to ionizing radiation);GO:0042148(strand invasion)	ko03440(Homologous recombination)	Y
PC-5p-838_6216	TAAACCTATCTATAACAACCT	down	TRINITY_DN108853_c0_g1	ammonium transporter, Ammonium/urea transporter [Artemisia annua]	24.92	14.47	down	GO:0005887(integral component of plasma membrane);GO:0008519(ammonium transmembrane transporter activity);GO:0015695(organic cation transport);GO:0019740(nitrogen utilization);GO:0072488(ammonium transmembrane transport)	-	Y
PC-5p-838_6216	TAAACCTATCTATAACAACCT	down	TRINITY_DN109050_c1_g1	START domain-containing protein [Artemisia annua]	24.42	20.2	down	GO:0005634(nucleus);GO:0005737(cytoplasm);GO:0008150(biological_process);GO:0008289(lipid binding);GO:0016021(integral component of membrane)	-	Y
PC-5p-838_6216	TAAACCTATCTATAACAACCT	down	TRINITY_DN109065_c0_g2	Armadillo-like helical [Artemisia annua]	53.31	41.58	down	GO:0009507(chloroplast)	-	Y
PC-5p-838_6216	TAAACCTATCTATAACAACCT	down	TRINITY_DN109233_c1_g4	nucleotide-sugar transporter family protein [Artemisia annua]	147.88	90.82	down	GO:0005794(Golgi apparatus);GO:0005886(plasma membrane);GO:0008514(organic anion transmembrane transporter activity);GO:0008643(carbohydrate transport);GO:0015780(nucleotide-sugar transmembrane transport);GO:0016021(integral component of membrane)	-	Y
PC-5p-838_6216	TAAACCTATCTATAACAACCT	down	TRINITY_DN110978_c2_g2	zinc finger, CCHC-type, Nucleic acid-binding, OB-fold protein [Artemisia annua]	22.92	20.88	down	GO:0003676(nucleic acid binding);GO:0003677(DNA binding);GO:0003729(mRNA binding);GO:0005515(protein binding);GO:0005634(nucleus);GO:0005737(cytoplasm);GO:0006355(regulation of transcription, DNA-templated);GO:0008270(zinc ion binding);GO:0009409(response to cold);GO:0009631(cold acclimation);GO:0009826(unidimensional cell growth);GO:0032508(DNA duplex unwinding)	-	Y
PC-5p-838_6216	TAAACCTATCTATAACAACCT	down	TRINITY_DN112510_c0_g2	ethylene-responsive transcription factor 3-like [Cynara cardunculus var. scolymus]	12.22	15.72	up	GO:0003677(DNA binding);GO:0003700(DNA binding transcription factor activity);GO:0005515(protein binding);GO:0005634(nucleus);GO:0006351(transcription, DNA-templated);GO:0006355(regulation of transcription, DNA-templated);GO:0006952(defense response);GO:0009873(ethylene-activated signaling pathway);GO:0010105(negative regulation of ethylene-activated signaling pathway);GO:0043565(sequence-specifi…	-	Y
PC-5p-838_6216	TAAACCTATCTATAACAACCT	down	TRINITY_DN112761_c0_g2	quinoprotein amine dehydrogenase, beta chain-like protein [Artemisia annua]	6.51	4.79	down	GO:0003674(molecular_function);GO:0005794(Golgi apparatus);GO:0008150(biological_process);GO:0009507(chloroplast);GO:0017112(Rab guanyl-nucleotide exchange factor activity);GO:0034066(RIC1-RGP1 guanyl-nucleotide exchange factor complex)	-	Y
PC-5p-838_6216	TAAACCTATCTATAACAACCT	down	TRINITY_DN114217_c0_g1	Concanavalin A-like lectin/glucanase superfamily [Artemisia annua]	19.98	25.15	up	GO:0005886(plasma membrane);GO:0008150(biological_process);GO:0016021(integral component of membrane);GO:0030246(carbohydrate binding)	-	Y
PC-5p-838_6216	TAAACCTATCTATAACAACCT	down	TRINITY_DN114912_c0_g2	6-phosphogluconate dehydrogenase, decarboxylating 2, chloroplastic isoform X1 [Helianthus annuus]	230.85	123.35	down	GO:0004616(phosphogluconate dehydrogenase (decarboxylating) activity);GO:0005515(protein binding);GO:0005737(cytoplasm);GO:0005829(cytosol);GO:0008114(phosphogluconate 2-dehydrogenase activity);GO:0009051(pentose-phosphate shunt, oxidative branch);GO:0009507(chloroplast);GO:0009536(plastid);GO:0009570(chloroplast stroma);GO:0009651(response to salt stress);GO:0016020(membrane);GO:0019521(D-glucon…	ko00030(Pentose phosphate pathway);ko00480(Glutathione metabolism)	Y
PC-5p-838_6216	TAAACCTATCTATAACAACCT	down	TRINITY_DN115578_c0_g1	spo11/DNA topoisomerase VI, subunit A protein [Artemisia annua]	43.78	44.7	up	GO:0000228(nuclear chromosome);GO:0000706(meiotic DNA double-strand break processing);GO:0000737(DNA catabolic process, endonucleolytic);GO:0003677(DNA binding);GO:0003918(DNA topoisomerase type II (ATP-hydrolyzing) activity);GO:0005515(protein binding);GO:0005524(ATP binding);GO:0005634(nucleus);GO:0006259(DNA metabolic process);GO:0006265(DNA topological change);GO:0007131(reciprocal meiotic re…	-	Y
PC-5p-838_6216	TAAACCTATCTATAACAACCT	down	TRINITY_DN115613_c0_g1	hypothetical protein CTI12_AA243140 [Artemisia annua]	24.95	17.34	down	-	-	Y
PC-5p-838_6216	TAAACCTATCTATAACAACCT	down	TRINITY_DN117845_c2_g1	F-box protein CPR1-like [Lactuca sativa]	3.73	4.39	down	GO:0004842(ubiquitin-protein transferase activity);GO:0019005(SCF ubiquitin ligase complex);GO:0031146(SCF-dependent proteasomal ubiquitin-dependent protein catabolic process)	-	Y
PC-5p-838_6216	TAAACCTATCTATAACAACCT	down	TRINITY_DN118143_c2_g1	GRAS protein, partial [Chrysanthemum x morifolium]	180.68	162.25	down	GO:0003700(DNA binding transcription factor activity);GO:0005634(nucleus);GO:0006355(regulation of transcription, DNA-templated);GO:0009723(response to ethylene);GO:0009737(response to abscisic acid);GO:0009863(salicylic acid mediated signaling pathway);GO:0009867(jasmonic acid mediated signaling pathway);GO:0009938(negative regulation of gibberellic acid mediated signaling pathway);GO:0010187(ne…	ko04075(Plant hormone signal transduction)	Y
PC-5p-838_6216	TAAACCTATCTATAACAACCT	down	TRINITY_DN119618_c1_g3	3-hydroxy-3-methylglutaryl coenzyme A reductase 1 [Chrysanthemum x morifolium]	148.32	74.15	down	GO:0004420(hydroxymethylglutaryl-CoA reductase (NADPH) activity);GO:0005778(peroxisomal membrane);GO:0005789(endoplasmic reticulum membrane);GO:0008299(isoprenoid biosynthetic process);GO:0016126(sterol biosynthetic process)	ko00900(Terpenoid backbone biosynthesis)	Y
PC-5p-838_6216	TAAACCTATCTATAACAACCT	down	TRINITY_DN120831_c1_g1	PREDICTED: T-complex protein 1 subunit gamma isoform X1 [Nicotiana attenuata]	25.76	24.5	down	GO:0005515(protein binding);GO:0005524(ATP binding);GO:0005737(cytoplasm);GO:0005829(cytosol)	-	Y
PC-5p-838_6216	TAAACCTATCTATAACAACCT	down	TRINITY_DN121330_c1_g2	probable inactive receptor kinase At1g27190 isoform X2 [Helianthus annuus]	8.36	7.97	down	GO:0004672(protein kinase activity);GO:0004674(protein serine/threonine kinase activity);GO:0005524(ATP binding);GO:0005576(extracellular region);GO:0005634(nucleus);GO:0005886(plasma membrane);GO:0006468(protein phosphorylation);GO:0007169(transmembrane receptor protein tyrosine kinase signaling pathway);GO:0016021(integral component of membrane);GO:0016301(kinase activity)	-	Y
PC-5p-838_6216	TAAACCTATCTATAACAACCT	down	TRINITY_DN121945_c1_g5	-	7.6	7.21	down	-	-	Y
PC-5p-838_6216	TAAACCTATCTATAACAACCT	down	TRINITY_DN123220_c5_g1	phytochrome-interacting ankyrin-repeat protein 1-like [Cynara cardunculus var. scolymus]	13.4	17.69	up	GO:0000151(ubiquitin ligase complex);GO:0004842(ubiquitin-protein transferase activity);GO:0005634(nucleus);GO:0005737(cytoplasm);GO:0008150(biological_process);GO:0031625(ubiquitin protein ligase binding)	-	Y
PC-5p-838_6216	TAAACCTATCTATAACAACCT	down	TRINITY_DN125076_c7_g1	hypothetical protein CTI12_AA289430 [Artemisia annua]	5.67	4.73	down	GO:0004725(protein tyrosine phosphatase activity);GO:0005634(nucleus);GO:0005737(cytoplasm)	ko03040(Spliceosome);ko03013(RNA transport);ko03015(mRNA surveillance pathway)	Y
PC-5p-838_6216	TAAACCTATCTATAACAACCT	down	TRINITY_DN92976_c6_g2	-	4.89	5.38	up	-	-	Y
PC-5p-838_6216	TAAACCTATCTATAACAACCT	down	TRINITY_DN94869_c6_g1	putative nucleotide-binding alpha-beta plait domain-containing protein [Helianthus annuus]	62.17	70.89	down	-	-	Y
PC-5p-838_6216	TAAACCTATCTATAACAACCT	down	TRINITY_DN96083_c0_g2	-	12.55	10.81	down	-	-	Y
PC-5p-838_6216	TAAACCTATCTATAACAACCT	down	TRINITY_DN96152_c1_g4	cytochrome P450 94A2 [Artemisia annua]	5.08	4.65	down	GO:0005506(iron ion binding);GO:0009507(chloroplast);GO:0009611(response to wounding);GO:0009694(jasmonic acid metabolic process);GO:0016021(integral component of membrane);GO:0016705(oxidoreductase activity, acting on paired donors, with incorporation or reduction of molecular oxygen);GO:0019825(oxygen binding);GO:0020037(heme binding);GO:0052694(jasmonoyl-isoleucine-12-hydroxylase activity);GO:…	ko00073(Cutin, suberine and wax biosynthesis)	Y
PC-5p-838_6216	TAAACCTATCTATAACAACCT	down	TRINITY_DN96267_c1_g1	hypothetical protein CTI12_AA458580 [Artemisia annua]	104.22	81.71	down	-	-	Y
PC-5p-838_6216	TAAACCTATCTATAACAACCT	down	TRINITY_DN98262_c5_g1	-	7.82	7.65	down	-	-	Y
PC-5p-838_6216	TAAACCTATCTATAACAACCT	down	TRINITY_DN98859_c3_g1	putative F-box domain-containing protein [Helianthus annuus]	8.62	9.81	up	-	-	Y
aly-miR393a-5p	TCCAAAGGGATCGCATTGATCC	down	TRINITY_DN111441_c0_g1	F-box/RNI-like superfamily protein [Artemisia annua]	38.61	45.72	up	GO:0000822(inositol hexakisphosphate binding);GO:0009734(auxin-activated signaling pathway)	ko04075(Plant hormone signal transduction)	Y
aly-miR393a-5p	TCCAAAGGGATCGCATTGATCC	down	TRINITY_DN113132_c0_g1	F-box domain, Leucine-rich repeat domain, L domain-like protein [Artemisia annua]	30.5	31.23	down	GO:0000822(inositol hexakisphosphate binding);GO:0009734(auxin-activated signaling pathway)	ko04075(Plant hormone signal transduction)	Y
aly-miR393a-5p	TCCAAAGGGATCGCATTGATCC	down	TRINITY_DN118727_c0_g1	hypothetical protein CTI12_AA055500 [Artemisia annua]	10.54	10.33	down	-	-	Y
aly-miR393a-5p	TCCAAAGGGATCGCATTGATCC	down	TRINITY_DN121033_c0_g3	sucrose synthase/cyanobacteria [Artemisia annua]	60.2	92.94	up	GO:0005982(starch metabolic process);GO:0005985(sucrose metabolic process);GO:0005986(sucrose biosynthetic process);GO:0008194(UDP-glycosyltransferase activity);GO:0009414(response to water deprivation);GO:0009507(chloroplast);GO:0010431(seed maturation);GO:0010555(response to mannitol);GO:0016157(sucrose synthase activity);GO:0016757(transferase activity, transferring glycosyl groups)	ko00500(Starch and sucrose metabolism)	Y
aly-miR393a-5p	TCCAAAGGGATCGCATTGATCC	down	TRINITY_DN121327_c1_g1	transport inhibitor response 1-like protein [Artemisia annua]	21.46	25.73	up	GO:0000151(ubiquitin ligase complex);GO:0000822(inositol hexakisphosphate binding);GO:0004842(ubiquitin-protein transferase activity);GO:0005515(protein binding);GO:0005634(nucleus);GO:0006511(ubiquitin-dependent protein catabolic process);GO:0006952(defense response);GO:0007049(cell cycle);GO:0009733(response to auxin);GO:0009734(auxin-activated signaling pathway);GO:0009873(ethylene-activated s…	ko04075(Plant hormone signal transduction)	Y
aly-miR393a-5p	TCCAAAGGGATCGCATTGATCC	down	TRINITY_DN123358_c3_g3	transport inhibitor response 1-like protein Os04g0395600 [Lactuca sativa]	8.08	9.92	up	GO:0000822(inositol hexakisphosphate binding);GO:0009734(auxin-activated signaling pathway)	ko04075(Plant hormone signal transduction)	Y
aly-miR393a-5p	TCCAAAGGGATCGCATTGATCC	down	TRINITY_DN123650_c1_g2	F-box/RNI-like superfamily protein [Artemisia annua]	4.8	7.78	up	GO:0000822(inositol hexakisphosphate binding);GO:0009734(auxin-activated signaling pathway)	ko04075(Plant hormone signal transduction)	Y
aly-miR393a-5p	TCCAAAGGGATCGCATTGATCC	down	TRINITY_DN89144_c0_g1	hypothetical protein CTI12_AA030850 [Artemisia annua]	10	19.22	up	GO:0003674(molecular_function);GO:0005886(plasma membrane)	-	Y
aly-miR393a-5p	TCCAAAGGGATCGCATTGATCC	down	TRINITY_DN92591_c0_g2	-	56.47	53.52	down	-	-	Y
aly-miR393a-5p	TCCAAAGGGATCGCATTGATCC	down	TRINITY_DN99602_c1_g1	basic helix-loop-helix (bHLH) DNA-binding superfamily protein [Artemisia annua]	11.73	12.68	up	GO:0003677(DNA binding);GO:0003700(DNA binding transcription factor activity);GO:0005634(nucleus);GO:0006351(transcription, DNA-templated);GO:0006355(regulation of transcription, DNA-templated);GO:0046983(protein dimerization activity)	-	Y
ath-miR162a-5p_L-1_2ss5GT6GA	GGATACAGCGGTTCATCGATC	down	TRINITY_DN105635_c2_g2	26S proteasome non-ATPase regulatory subunit 4 [Artemisia annua]	5.38	6.61	up	GO:0005634(nucleus);GO:0005829(cytosol);GO:0008540(proteasome regulatory particle, base subcomplex);GO:0031593(polyubiquitin modification-dependent protein binding);GO:0043161(proteasome-mediated ubiquitin-dependent protein catabolic process);GO:0043248(proteasome assembly)	ko03050(Proteasome)	Y
ath-miR162a-5p_L-1_2ss5GT6GA	GGATACAGCGGTTCATCGATC	down	TRINITY_DN123052_c1_g1	dDENN domain-containing protein [Artemisia annua]	18.46	23.57	up	GO:0003674(molecular_function);GO:0005634(nucleus);GO:0008150(biological_process)	-	Y
ath-miR162a-5p_L-1_2ss5GT6GA	GGATACAGCGGTTCATCGATC	down	TRINITY_DN99250_c2_g2	Clathrin light chain [Artemisia annua]	90.79	71.67	down	GO:0005198(structural molecule activity);GO:0030125(clathrin vesicle coat);GO:0032050(clathrin heavy chain binding);GO:0072583(clathrin-dependent endocytosis)	ko04144(Endocytosis)	Y
cca-MIR6111-p3	TTATGAAGGTAGTCTAGCCCAC	down	TRINITY_DN100408_c2_g1	-	8930.94	10965	up	-	-	Y
cca-MIR6111-p3	TTATGAAGGTAGTCTAGCCCAC	down	TRINITY_DN105494_c6_g5	hypothetical protein LSAT_9X122720 [Lactuca sativa]	8.26	8.57	up	GO:0004672(protein kinase activity);GO:0004674(protein serine/threonine kinase activity);GO:0005524(ATP binding);GO:0005886(plasma membrane);GO:0006468(protein phosphorylation);GO:0009506(plasmodesma);GO:0009741(response to brassinosteroid);GO:0009742(brassinosteroid mediated signaling pathway);GO:0009791(post-embryonic development);GO:0009826(unidimensional cell growth);GO:0016021(integral compo…	-	Y
cca-MIR6111-p3	TTATGAAGGTAGTCTAGCCCAC	down	TRINITY_DN108138_c4_g2	hypothetical protein CTI12_AA083030 [Artemisia annua]	6.66	9.49	up	-	-	Y
cca-MIR6111-p3	TTATGAAGGTAGTCTAGCCCAC	down	TRINITY_DN109019_c2_g1	-	8.81	8.3	down	-	-	Y
cca-MIR6111-p3	TTATGAAGGTAGTCTAGCCCAC	down	TRINITY_DN109559_c1_g1	fertilization-independent endosperm [Artemisia annua]	22.85	22.78	down	GO:0000003(reproduction);GO:0000166(nucleotide binding);GO:0003700(DNA binding transcription factor activity);GO:0005515(protein binding);GO:0005634(nucleus);GO:0005677(chromatin silencing complex);GO:0005834(heterotrimeric G-protein complex);GO:0006349(regulation of gene expression by genetic imprinting);GO:0006351(transcription, DNA-templated);GO:0006355(regulation of transcription, DNA-templat…	-	Y
cca-MIR6111-p3	TTATGAAGGTAGTCTAGCCCAC	down	TRINITY_DN110869_c2_g1	-	2.91	5.37	up	-	-	Y
cca-MIR6111-p3	TTATGAAGGTAGTCTAGCCCAC	down	TRINITY_DN112634_c1_g1	Retrovirus-related Pol polyprotein from transposon TNT 1-94 [Artemisia annua]	11.37	9.29	down	-	-	Y
cca-MIR6111-p3	TTATGAAGGTAGTCTAGCCCAC	down	TRINITY_DN115020_c0_g1	receptor-like protein kinase HERK 1 [Helianthus annuus]	25.84	16.03	down	GO:0004672(protein kinase activity);GO:0004674(protein serine/threonine kinase activity);GO:0005524(ATP binding);GO:0005886(plasma membrane);GO:0006468(protein phosphorylation);GO:0009506(plasmodesma);GO:0009741(response to brassinosteroid);GO:0009742(brassinosteroid mediated signaling pathway);GO:0009791(post-embryonic development);GO:0009826(unidimensional cell growth);GO:0016021(integral compo…	-	Y
cca-MIR6111-p3	TTATGAAGGTAGTCTAGCCCAC	down	TRINITY_DN122280_c0_g1	vascular endothelial growth factor receptor 2 (VEGFR2) [Artemisia annua]	6.68	9.59	up	GO:0004674(protein serine/threonine kinase activity);GO:0005524(ATP binding);GO:0005886(plasma membrane);GO:0016301(kinase activity);GO:0016787(hydrolase activity);GO:0046777(protein autophosphorylation)	-	Y
cca-MIR6111-p3	TTATGAAGGTAGTCTAGCCCAC	down	TRINITY_DN122510_c1_g2	ethylene induced calmodulin binding protein [Artemisia annua]	11.69	12.22	up	GO:0005634(nucleus);GO:0043565(sequence-specific DNA binding);GO:0045944(positive regulation of transcription by RNA polymerase II)	-	Y
cca-MIR6111-p3	TTATGAAGGTAGTCTAGCCCAC	down	TRINITY_DN125006_c0_g1	serine/threonine-protein kinase PBS1, partial [Chrysanthemum boreale]	8.67	5.93	down	GO:0004675(transmembrane receptor protein serine/threonine kinase activity);GO:0005515(protein binding);GO:0005524(ATP binding);GO:0005886(plasma membrane);GO:0006468(protein phosphorylation);GO:0007166(cell surface receptor signaling pathway);GO:0009742(brassinosteroid mediated signaling pathway);GO:0016301(kinase activity);GO:1900459(positive regulation of brassinosteroid mediated signaling pat…	ko04626(Plant-pathogen interaction)	Y
cca-MIR6111-p3	TTATGAAGGTAGTCTAGCCCAC	down	TRINITY_DN96579_c0_g2	-	6.36	8.96	up	-	-	Y
cca-MIR6111-p3	TTATGAAGGTAGTCTAGCCCAC	down	TRINITY_DN98062_c0_g1	serine/threonine-protein kinase PBS1 [Artemisia annua]	13.26	12.63	down	GO:0004675(transmembrane receptor protein serine/threonine kinase activity);GO:0005515(protein binding);GO:0005524(ATP binding);GO:0005886(plasma membrane);GO:0006468(protein phosphorylation);GO:0007166(cell surface receptor signaling pathway);GO:0009742(brassinosteroid mediated signaling pathway);GO:0016301(kinase activity);GO:1900459(positive regulation of brassinosteroid mediated signaling pat…	-	Y
cca-MIR6111-p5	TTATGAAGGTAGTCTAGCCCAC	down	TRINITY_DN100408_c2_g1	-	8930.94	10965	up	-	-	Y
cca-MIR6111-p5	TTATGAAGGTAGTCTAGCCCAC	down	TRINITY_DN104413_c0_g4	PREDICTED: exonuclease 1-like [Beta vulgaris subsp. vulgaris]	5.67	5.17	down	GO:0003677(DNA binding);GO:0004518(nuclease activity);GO:0004519(endonuclease activity);GO:0005634(nucleus);GO:0006281(DNA repair);GO:0035312(5'-3' exodeoxyribonuclease activity);GO:0046872(metal ion binding)	ko03430(Mismatch repair)	Y
cca-MIR6111-p5	TTATGAAGGTAGTCTAGCCCAC	down	TRINITY_DN105494_c6_g5	hypothetical protein LSAT_9X122720 [Lactuca sativa]	8.26	8.57	up	GO:0004672(protein kinase activity);GO:0004674(protein serine/threonine kinase activity);GO:0005524(ATP binding);GO:0005886(plasma membrane);GO:0006468(protein phosphorylation);GO:0009506(plasmodesma);GO:0009741(response to brassinosteroid);GO:0009742(brassinosteroid mediated signaling pathway);GO:0009791(post-embryonic development);GO:0009826(unidimensional cell growth);GO:0016021(integral compo…	-	Y
cca-MIR6111-p5	TTATGAAGGTAGTCTAGCCCAC	down	TRINITY_DN108138_c4_g2	hypothetical protein CTI12_AA083030 [Artemisia annua]	6.66	9.49	up	-	-	Y
cca-MIR6111-p5	TTATGAAGGTAGTCTAGCCCAC	down	TRINITY_DN109019_c2_g1	-	8.81	8.3	down	-	-	Y
cca-MIR6111-p5	TTATGAAGGTAGTCTAGCCCAC	down	TRINITY_DN109559_c1_g1	fertilization-independent endosperm [Artemisia annua]	22.85	22.78	down	GO:0000003(reproduction);GO:0000166(nucleotide binding);GO:0003700(DNA binding transcription factor activity);GO:0005515(protein binding);GO:0005634(nucleus);GO:0005677(chromatin silencing complex);GO:0005834(heterotrimeric G-protein complex);GO:0006349(regulation of gene expression by genetic imprinting);GO:0006351(transcription, DNA-templated);GO:0006355(regulation of transcription, DNA-templat…	-	Y
cca-MIR6111-p5	TTATGAAGGTAGTCTAGCCCAC	down	TRINITY_DN110869_c2_g1	-	2.91	5.37	up	-	-	Y
cca-MIR6111-p5	TTATGAAGGTAGTCTAGCCCAC	down	TRINITY_DN112634_c1_g1	Retrovirus-related Pol polyprotein from transposon TNT 1-94 [Artemisia annua]	11.37	9.29	down	-	-	Y
cca-MIR6111-p5	TTATGAAGGTAGTCTAGCCCAC	down	TRINITY_DN123206_c3_g4	Concanavalin A-like lectin/glucanase, subgroup [Artemisia annua]	4.51	4.68	up	GO:0004674(protein serine/threonine kinase activity);GO:0005524(ATP binding);GO:0005576(extracellular region);GO:0006468(protein phosphorylation);GO:0016021(integral component of membrane);GO:0016301(kinase activity);GO:0016310(phosphorylation)	-	Y
cca-MIR6111-p5	TTATGAAGGTAGTCTAGCCCAC	down	TRINITY_DN123765_c1_g3	shikimate O-hydroxycinnamoyltransferase-like [Cynara cardunculus var. scolymus]	12.22	4.59	down	GO:0005515(protein binding);GO:0005737(cytoplasm);GO:0005829(cytosol);GO:0009809(lignin biosynthetic process);GO:0009963(positive regulation of flavonoid biosynthetic process);GO:0010252(auxin homeostasis);GO:0016020(membrane);GO:0016740(transferase activity);GO:0047172(shikimate O-hydroxycinnamoyltransferase activity);GO:0047205(quinate O-hydroxycinnamoyltransferase activity);GO:0071555(cell wal…	ko00940(Phenylpropanoid biosynthesis);ko00945(Stilbenoid, diarylheptanoid and gingerol biosynthesis);ko00941(Flavonoid biosynthesis)	Y
cca-MIR6111-p5	TTATGAAGGTAGTCTAGCCCAC	down	TRINITY_DN94083_c1_g2	-	133.45	5.03	down	-	-	Y
cca-MIR6111-p5	TTATGAAGGTAGTCTAGCCCAC	down	TRINITY_DN98812_c0_g2	hypothetical protein HannXRQ_Chr02g0056891 [Helianthus annuus]	5.42	3.91	down	-	-	Y
cca-miR6111-5p_R-2_1ss20GT	TCTTTATGTCACGATGTATT	up	TRINITY_DN100015_c0_g1	AGC (cAMP-dependent, cGMP-dependent and protein kinase C) kinase family protein [Artemisia annua]	11.74	12.89	up	GO:0004674(protein serine/threonine kinase activity);GO:0005622(intracellular);GO:0018105(peptidyl-serine phosphorylation);GO:0035556(intracellular signal transduction)	-	Y
cca-miR6111-5p_R-2_1ss20GT	TCTTTATGTCACGATGTATT	up	TRINITY_DN101502_c0_g1	NAD(P)-binding Rossmann-fold superfamily protein [Artemisia annua]	56.64	51.76	down	GO:0003954(NADH dehydrogenase activity);GO:1901006(ubiquinone-6 biosynthetic process)	ko00190(Oxidative phosphorylation)	Y
cca-miR6111-5p_R-2_1ss20GT	TCTTTATGTCACGATGTATT	up	TRINITY_DN101863_c4_g1	Polyketide cyclase/dehydrase [Artemisia annua]	24.37	17.09	down	GO:0004864(protein phosphatase inhibitor activity);GO:0005634(nucleus);GO:0005737(cytoplasm);GO:0009738(abscisic acid-activated signaling pathway);GO:0010427(abscisic acid binding);GO:0080163(regulation of protein serine/threonine phosphatase activity)	ko04016(MAPK signaling pathway - plant);ko04075(Plant hormone signal transduction)	Y
cca-miR6111-5p_R-2_1ss20GT	TCTTTATGTCACGATGTATT	up	TRINITY_DN104387_c2_g3	-	173.23	180.97	up	-	-	Y
cca-miR6111-5p_R-2_1ss20GT	TCTTTATGTCACGATGTATT	up	TRINITY_DN104531_c0_g1	uncharacterized protein LOC111910249 [Lactuca sativa]	125.01	124.43	down	GO:0004674(protein serine/threonine kinase activity);GO:0005886(plasma membrane);GO:0006468(protein phosphorylation);GO:0006952(defense response);GO:0009506(plasmodesma)	ko00230(Purine metabolism);ko00240(Pyrimidine metabolism);ko03020(RNA polymerase)	Y
cca-miR6111-5p_R-2_1ss20GT	TCTTTATGTCACGATGTATT	up	TRINITY_DN105530_c0_g2	probable CCR4-associated factor 1 homolog 11 [Helianthus annuus]	103.75	53.33	down	GO:0000175(3'-5'-exoribonuclease activity);GO:0000288(nuclear-transcribed mRNA catabolic process, deadenylation-dependent decay);GO:0030014(CCR4-NOT complex)	ko03018(RNA degradation)	Y
cca-miR6111-5p_R-2_1ss20GT	TCTTTATGTCACGATGTATT	up	TRINITY_DN105896_c0_g1	serine/threonine-protein kinase Rad53 [Artemisia annua]	31.32	35.94	up	GO:0004693(cyclin-dependent protein serine/threonine kinase activity);GO:0005515(protein binding);GO:0005524(ATP binding);GO:0005634(nucleus);GO:0005829(cytosol);GO:0006468(protein phosphorylation);GO:0008353(RNA polymerase II carboxy-terminal domain kinase activity);GO:0009615(response to virus);GO:0016301(kinase activity);GO:0048366(leaf development)	-	Y
cca-miR6111-5p_R-2_1ss20GT	TCTTTATGTCACGATGTATT	up	TRINITY_DN106039_c4_g1	protein kinase-like domain, Phloem protein 2-like protein [Artemisia annua]	9.47	5.23	down	GO:0004674(protein serine/threonine kinase activity);GO:0005524(ATP binding);GO:0005886(plasma membrane);GO:0006468(protein phosphorylation);GO:0009506(plasmodesma);GO:0016021(integral component of membrane);GO:0016301(kinase activity);GO:0046777(protein autophosphorylation)	-	Y
cca-miR6111-5p_R-2_1ss20GT	TCTTTATGTCACGATGTATT	up	TRINITY_DN108160_c1_g2	HSP20-like chaperones superfamily protein [Artemisia annua]	63.89	53.78	down	GO:0005737(cytoplasm);GO:0005829(cytosol);GO:0006457(protein folding);GO:0009408(response to heat);GO:0009555(pollen development);GO:0009735(response to cytokinin);GO:0009880(embryonic pattern specification);GO:0009965(leaf morphogenesis);GO:0010286(heat acclimation);GO:0010450(inflorescence meristem growth);GO:0032502(developmental process);GO:0048448(stamen morphogenesis);GO:0048833(specificati…	-	Y
cca-miR6111-5p_R-2_1ss20GT	TCTTTATGTCACGATGTATT	up	TRINITY_DN109083_c3_g2	protein kinase-like domain-containing protein [Artemisia annua]	2.89	3.75	up	-	-	Y
cca-miR6111-5p_R-2_1ss20GT	TCTTTATGTCACGATGTATT	up	TRINITY_DN109662_c1_g1	RWD domain-containing protein [Artemisia annua]	27.31	33.9	up	GO:0005737(cytoplasm);GO:0008150(biological_process)	-	Y
cca-miR6111-5p_R-2_1ss20GT	TCTTTATGTCACGATGTATT	up	TRINITY_DN110432_c2_g1	acyl-CoA N-acyltransferases (NAT) superfamily protein [Artemisia annua]	36.64	46.24	up	GO:0006475(internal protein amino acid acetylation);GO:0017198(N-terminal peptidyl-serine acetylation);GO:0018002(N-terminal peptidyl-glutamic acid acetylation);GO:0022626(cytosolic ribosome);GO:0031415(NatA complex);GO:1990189(peptide-serine-N-acetyltransferase activity);GO:1990190(peptide-glutamate-N-acetyltransferase activity)	-	Y
cca-miR6111-5p_R-2_1ss20GT	TCTTTATGTCACGATGTATT	up	TRINITY_DN110863_c2_g6	hypothetical protein CTI12_AA054830 [Artemisia annua]	0.93	3.01	up	-	-	Y
cca-miR6111-5p_R-2_1ss20GT	TCTTTATGTCACGATGTATT	up	TRINITY_DN111721_c0_g1	acetamidase/Formamidase family protein [Artemisia annua]	33.35	93.07	up	GO:0004328(formamidase activity);GO:0005575(cellular_component);GO:0016811(hydrolase activity, acting on carbon-nitrogen (but not peptide) bonds, in linear amides)	ko00630(Glyoxylate and dicarboxylate metabolism);ko00910(Nitrogen metabolism);ko00460(Cyanoamino acid metabolism)	Y
cca-miR6111-5p_R-2_1ss20GT	TCTTTATGTCACGATGTATT	up	TRINITY_DN111930_c0_g1	pentatricopeptide repeat (PPR) superfamily protein [Artemisia annua]	96.8	82.65	down	GO:0003674(molecular_function);GO:0005739(mitochondrion);GO:0008150(biological_process)	-	Y
cca-miR6111-5p_R-2_1ss20GT	TCTTTATGTCACGATGTATT	up	TRINITY_DN112032_c1_g1	hypothetical protein CTI12_AA110830 [Artemisia annua]	74.93	94.59	up	GO:0009507(chloroplast);GO:0016021(integral component of membrane)	-	Y
cca-miR6111-5p_R-2_1ss20GT	TCTTTATGTCACGATGTATT	up	TRINITY_DN112242_c0_g2	Zinc finger, FYVE/PHD-type [Artemisia annua]	6.62	9.38	up	GO:0005198(structural molecule activity);GO:0005515(protein binding);GO:0005794(Golgi apparatus);GO:0005829(cytosol);GO:0005886(plasma membrane);GO:0006886(intracellular protein transport);GO:0006897(endocytosis);GO:0009506(plasmodesma);GO:0009507(chloroplast);GO:0016020(membrane);GO:0016192(vesicle-mediated transport);GO:0030130(clathrin coat of trans-Golgi network vesicle);GO:0030132(clathrin c…	-	Y
cca-miR6111-5p_R-2_1ss20GT	TCTTTATGTCACGATGTATT	up	TRINITY_DN112279_c0_g1	cytochrome P450 [Artemisia annua]	13.93	16.1	up	GO:0004497(monooxygenase activity)	-	Y
cca-miR6111-5p_R-2_1ss20GT	TCTTTATGTCACGATGTATT	up	TRINITY_DN112483_c2_g1	Ribosomal RNA large subunit methyltransferase E [Artemisia annua]	9.98	5.5	down	GO:0000463(maturation of LSU-rRNA from tricistronic rRNA transcript (SSU-rRNA, 5.8S rRNA, LSU-rRNA));GO:0000466(maturation of 5.8S rRNA from tricistronic rRNA transcript (SSU-rRNA, 5.8S rRNA, LSU-rRNA));GO:0005730(nucleolus);GO:0008650(rRNA (uridine-2'-O-)-methyltransferase activity);GO:0016435(rRNA (guanine) methyltransferase activity);GO:0030687(preribosome, large subunit precursor);GO:0031167(…	-	Y
cca-miR6111-5p_R-2_1ss20GT	TCTTTATGTCACGATGTATT	up	TRINITY_DN112953_c1_g2	actin-7-like [Lactuca sativa]	453.4	384.64	down	GO:0005200(structural constituent of cytoskeleton);GO:0005515(protein binding);GO:0005524(ATP binding);GO:0005618(cell wall);GO:0005730(nucleolus);GO:0005737(cytoplasm);GO:0005739(mitochondrion);GO:0005829(cytosol);GO:0005856(cytoskeleton);GO:0005886(plasma membrane);GO:0007010(cytoskeleton organization);GO:0009416(response to light stimulus);GO:0009506(plasmodesma);GO:0009570(chloroplast stroma)…	-	Y
cca-miR6111-5p_R-2_1ss20GT	TCTTTATGTCACGATGTATT	up	TRINITY_DN113645_c0_g1	serine carboxypeptidase-like 51 [Artemisia annua]	11.26	7.62	down	GO:0004185(serine-type carboxypeptidase activity);GO:0051603(proteolysis involved in cellular protein catabolic process)	-	Y
cca-miR6111-5p_R-2_1ss20GT	TCTTTATGTCACGATGTATT	up	TRINITY_DN114061_c0_g1	hypothetical protein CTI12_AA152330 [Artemisia annua]	25.8	23.43	down	GO:0005739(mitochondrion);GO:0005829(cytosol);GO:0008150(biological_process)	-	Y
cca-miR6111-5p_R-2_1ss20GT	TCTTTATGTCACGATGTATT	up	TRINITY_DN115401_c0_g1	DNA/RNA helicase, DEAD/DEAH box type, N-terminal [Artemisia annua]	12.63	10.52	down	GO:0004004(ATP-dependent RNA helicase activity);GO:0010501(RNA secondary structure unwinding)	-	Y
cca-miR6111-5p_R-2_1ss20GT	TCTTTATGTCACGATGTATT	up	TRINITY_DN115722_c1_g2	rossmann-like alpha/beta/alpha sandwich fold protein [Artemisia annua]	6.83	6.98	up	-	-	Y
cca-miR6111-5p_R-2_1ss20GT	TCTTTATGTCACGATGTATT	up	TRINITY_DN116022_c1_g3	hypothetical protein CTI12_AA070610 [Artemisia annua]	13.68	15.8	up	-	-	Y
cca-miR6111-5p_R-2_1ss20GT	TCTTTATGTCACGATGTATT	up	TRINITY_DN116948_c1_g5	proline-rich receptor-like protein kinase PERK3 [Lactuca sativa]	16.01	16.13	down	GO:0004674(protein serine/threonine kinase activity);GO:0005886(plasma membrane);GO:0007166(cell surface receptor signaling pathway)	-	Y
cca-miR6111-5p_R-2_1ss20GT	TCTTTATGTCACGATGTATT	up	TRINITY_DN117000_c1_g5	magnesium transporter 6 [Artemisia annua]	24.5	34.51	up	GO:0015095(magnesium ion transmembrane transporter activity);GO:0015693(magnesium ion transport)	-	Y
cca-miR6111-5p_R-2_1ss20GT	TCTTTATGTCACGATGTATT	up	TRINITY_DN117108_c0_g1	tumor susceptibility protein [Artemisia annua]	21.03	20.73	down	GO:0000813(ESCRT I complex);GO:0005515(protein binding);GO:0005634(nucleus);GO:0005770(late endosome);GO:0006464(cellular protein modification process);GO:0015031(protein transport)	ko04144(Endocytosis)	Y
cca-miR6111-5p_R-2_1ss20GT	TCTTTATGTCACGATGTATT	up	TRINITY_DN117655_c1_g1	alpha/beta-Hydrolases superfamily protein [Artemisia annua]	11.94	14.54	up	GO:0005764(lysosome);GO:0016790(thiolester hydrolase activity);GO:0043231(intracellular membrane-bounded organelle)	ko00062(Fatty acid elongation)	Y
cca-miR6111-5p_R-2_1ss20GT	TCTTTATGTCACGATGTATT	up	TRINITY_DN118111_c1_g1	sulfate transporter 3,5 [Artemisia annua]	52.07	31.15	down	GO:0005887(integral component of plasma membrane);GO:0015116(sulfate transmembrane transporter activity)	-	Y
cca-miR6111-5p_R-2_1ss20GT	TCTTTATGTCACGATGTATT	up	TRINITY_DN118420_c1_g3	Sde2 N-terminal domain-containing protein [Artemisia annua]	8.65	16.51	up	GO:0005634(nucleus)	-	Y
cca-miR6111-5p_R-2_1ss20GT	TCTTTATGTCACGATGTATT	up	TRINITY_DN119052_c0_g1	RecF/RecN/SMC [Artemisia annua]	24.36	19.13	down	GO:0000775(chromosome, centromeric region);GO:0000785(chromatin);GO:0003682(chromatin binding);GO:0005524(ATP binding);GO:0005634(nucleus);GO:0005737(cytoplasm);GO:0005819(spindle);GO:0006281(DNA repair);GO:0007059(chromosome segregation);GO:0007062(sister chromatid cohesion);GO:0008278(cohesin complex);GO:0009506(plasmodesma);GO:0016363(nuclear matrix);GO:0051301(cell division);GO:0051321(meioti…	-	Y
cca-miR6111-5p_R-2_1ss20GT	TCTTTATGTCACGATGTATT	up	TRINITY_DN119442_c0_g2	UDP-glucuronosyl/UDP-glucosyltransferase [Artemisia annua]	16.09	13.57	down	GO:0009813(flavonoid biosynthetic process);GO:0043231(intracellular membrane-bounded organelle);GO:0052696(flavonoid glucuronidation);GO:0080043(quercetin 3-O-glucosyltransferase activity);GO:0080044(quercetin 7-O-glucosyltransferase activity)	-	Y
cca-miR6111-5p_R-2_1ss20GT	TCTTTATGTCACGATGTATT	up	TRINITY_DN119722_c1_g2	cellular retinaldehyde binding/alpha-tocopherol transport [Artemisia annua]	69.75	64.83	down	GO:0005215(transporter activity);GO:0005634(nucleus);GO:0005829(cytosol);GO:0005886(plasma membrane);GO:0006810(transport);GO:0007049(cell cycle);GO:0008289(lipid binding);GO:0051301(cell division)	-	Y
cca-miR6111-5p_R-2_1ss20GT	TCTTTATGTCACGATGTATT	up	TRINITY_DN119972_c0_g1	jacalin-like lectin domain-containing protein [Artemisia annua]	14.87	10.11	down	GO:0004674(protein serine/threonine kinase activity);GO:0005524(ATP binding);GO:0005576(extracellular region);GO:0006468(protein phosphorylation);GO:0016021(integral component of membrane);GO:0016301(kinase activity);GO:0016310(phosphorylation)	-	Y
cca-miR6111-5p_R-2_1ss20GT	TCTTTATGTCACGATGTATT	up	TRINITY_DN120699_c1_g2	calcium-dependent protein kinase 16 [Artemisia annua]	34.3	20.54	down	GO:0004683(calmodulin-dependent protein kinase activity);GO:0005516(calmodulin binding);GO:0005634(nucleus);GO:0005737(cytoplasm);GO:0005886(plasma membrane);GO:0009738(abscisic acid-activated signaling pathway);GO:0009931(calcium-dependent protein serine/threonine kinase activity);GO:0018105(peptidyl-serine phosphorylation);GO:0035556(intracellular signal transduction);GO:0046777(protein autopho…	ko04626(Plant-pathogen interaction)	Y
cca-miR6111-5p_R-2_1ss20GT	TCTTTATGTCACGATGTATT	up	TRINITY_DN121002_c1_g2	60S ribosomal protein L15 [Artemisia annua]	51.54	61.08	up	GO:0002181(cytoplasmic translation);GO:0003735(structural constituent of ribosome);GO:0022625(cytosolic large ribosomal subunit)	ko03010(Ribosome)	Y
cca-miR6111-5p_R-2_1ss20GT	TCTTTATGTCACGATGTATT	up	TRINITY_DN121529_c13_g1	-	4645.47	4924.54	up	GO:0008234(cysteine-type peptidase activity)	-	Y
cca-miR6111-5p_R-2_1ss20GT	TCTTTATGTCACGATGTATT	up	TRINITY_DN121756_c0_g2	casein kinase I-like 3 [Artemisia annua]	31.99	25.96	down	GO:0004674(protein serine/threonine kinase activity);GO:0005634(nucleus);GO:0005737(cytoplasm);GO:0006897(endocytosis);GO:0008360(regulation of cell shape);GO:0016055(Wnt signaling pathway);GO:0018105(peptidyl-serine phosphorylation)	-	Y
cca-miR6111-5p_R-2_1ss20GT	TCTTTATGTCACGATGTATT	up	TRINITY_DN121867_c0_g5	hypothetical protein CTI12_AA190320 [Artemisia annua]	48.42	63.38	up	GO:0005634(nucleus);GO:0016874(ligase activity)	ko03050(Proteasome)	Y
cca-miR6111-5p_R-2_1ss20GT	TCTTTATGTCACGATGTATT	up	TRINITY_DN123116_c1_g1	Zein-binding domain-containing protein [Artemisia annua]	22.67	28.3	up	GO:0003674(molecular_function);GO:0005634(nucleus);GO:0008150(biological_process)	-	Y
cca-miR6111-5p_R-2_1ss20GT	TCTTTATGTCACGATGTATT	up	TRINITY_DN123166_c2_g2	NAF domain-containing protein [Artemisia annua]	27.81	19.43	down	GO:0004674(protein serine/threonine kinase activity);GO:0005634(nucleus);GO:0005737(cytoplasm);GO:0006468(protein phosphorylation);GO:0035556(intracellular signal transduction)	-	Y
cca-miR6111-5p_R-2_1ss20GT	TCTTTATGTCACGATGTATT	up	TRINITY_DN123544_c4_g1	peptidase S8, subtilisin-related protein [Artemisia annua]	43.91	31.28	down	GO:0004252(serine-type endopeptidase activity);GO:0005618(cell wall)	-	Y
cca-miR6111-5p_R-2_1ss20GT	TCTTTATGTCACGATGTATT	up	TRINITY_DN124304_c3_g1	leucine-rich repeat protein kinase family protein [Artemisia annua]	8.97	10.23	up	GO:0004672(protein kinase activity);GO:0005524(ATP binding);GO:0005634(nucleus)	ko04016(MAPK signaling pathway - plant);ko04626(Plant-pathogen interaction)	Y
cca-miR6111-5p_R-2_1ss20GT	TCTTTATGTCACGATGTATT	up	TRINITY_DN87968_c0_g2	delta(24)-sterol reductase [Artemisia annua]	16.11	10.96	down	GO:0008202(steroid metabolic process)	ko00100(Steroid biosynthesis)	Y
cca-miR6111-5p_R-2_1ss20GT	TCTTTATGTCACGATGTATT	up	TRINITY_DN89535_c0_g1	Lipase/lipooxygenase, PLAT/LH2 [Artemisia annua]	42.07	81.29	up	GO:0003674(molecular_function);GO:0005576(extracellular region);GO:0005773(vacuole);GO:0005774(vacuolar membrane);GO:0005783(endoplasmic reticulum);GO:0005829(cytosol);GO:0005886(plasma membrane);GO:0009409(response to cold);GO:0009414(response to water deprivation);GO:0009507(chloroplast);GO:0009535(chloroplast thylakoid membrane);GO:0009579(thylakoid);GO:0009651(response to salt stress);GO:0010…	-	Y
cca-miR6111-5p_R-2_1ss20GT	TCTTTATGTCACGATGTATT	up	TRINITY_DN91948_c1_g5	2-oxoglutarate (2OG) and Fe(II)-dependent oxygenase superfamily protein (mitochondrion) [Artemisia annua]	5.68	1.65	down	GO:0051213(dioxygenase activity)	ko04141(Protein processing in endoplasmic reticulum)	Y
cca-miR6111-5p_R-2_1ss20GT	TCTTTATGTCACGATGTATT	up	TRINITY_DN92301_c0_g3	serine/threonine-protein kinase, active site protein [Artemisia annua]	7.57	7.76	down	-	-	Y
cca-miR6111-5p_R-2_1ss20GT	TCTTTATGTCACGATGTATT	up	TRINITY_DN94377_c2_g4	elongation factor 1 alpha [Artemisia annua]	56.31	57.97	up	GO:0003746(translation elongation factor activity);GO:0003924(GTPase activity);GO:0005622(intracellular)	ko03013(RNA transport)	Y
cca-miR6111-5p_R-2_1ss20GT	TCTTTATGTCACGATGTATT	up	TRINITY_DN94887_c0_g2	UDP-glucuronosyl/UDP-glucosyltransferase [Artemisia annua]	15.21	17.87	up	GO:0009813(flavonoid biosynthetic process);GO:0043231(intracellular membrane-bounded organelle);GO:0052696(flavonoid glucuronidation);GO:0080043(quercetin 3-O-glucosyltransferase activity);GO:0080044(quercetin 7-O-glucosyltransferase activity)	ko00565(Ether lipid metabolism);ko00600(Sphingolipid metabolism)	Y
cca-miR6111-5p_R-2_1ss20GT	TCTTTATGTCACGATGTATT	up	TRINITY_DN95907_c3_g1	hypothetical protein CTI12_AA554010 [Artemisia annua]	3.61	2.43	down	GO:0003674(molecular_function);GO:0005634(nucleus)	-	Y
cca-miR6111-5p_R-2_1ss20GT	TCTTTATGTCACGATGTATT	up	TRINITY_DN97196_c1_g1	START-like domain, Bet v I type allergen [Artemisia annua]	66.29	54.2	down	GO:0004864(protein phosphatase inhibitor activity);GO:0005634(nucleus);GO:0005737(cytoplasm);GO:0009738(abscisic acid-activated signaling pathway);GO:0010427(abscisic acid binding);GO:0080163(regulation of protein serine/threonine phosphatase activity)	-	Y
cca-miR6111-5p_R-2_1ss20GT	TCTTTATGTCACGATGTATT	up	TRINITY_DN97374_c0_g2	casein kinase 1-like protein 10 [Artemisia annua]	10.39	9.49	down	GO:0004674(protein serine/threonine kinase activity);GO:0005634(nucleus);GO:0005737(cytoplasm);GO:0006897(endocytosis);GO:0008360(regulation of cell shape);GO:0016055(Wnt signaling pathway);GO:0018105(peptidyl-serine phosphorylation)	-	Y
csi-miR168-5p	TCGCTTGGTGCAGGTCGGGAA	up	TRINITY_DN110857_c0_g2	vascular plant one zinc finger protein [Artemisia annua]	10.84	11.88	up	GO:0005515(protein binding);GO:0005634(nucleus);GO:0005737(cytoplasm);GO:0006351(transcription, DNA-templated);GO:0009408(response to heat);GO:0009414(response to water deprivation);GO:0009585(red, far-red light phototransduction);GO:0009631(cold acclimation);GO:0009816(defense response to bacterium, incompatible interaction);GO:0043565(sequence-specific DNA binding);GO:0045893(positive regulatio…	-	Y
csi-miR168-5p	TCGCTTGGTGCAGGTCGGGAA	up	TRINITY_DN116230_c0_g1	FASCICLIN-like arabinogalactan 1 [Artemisia annua]	57.89	28.53	down	GO:0005618(cell wall);GO:0005886(plasma membrane);GO:0031225(anchored component of membrane);GO:0046658(anchored component of plasma membrane);GO:0048046(apoplast);GO:0048364(root development);GO:0048367(shoot system development)	-	Y
csi-miR168-5p	TCGCTTGGTGCAGGTCGGGAA	up	TRINITY_DN117569_c1_g3	zinc finger, RING/FYVE/PHD-type [Artemisia annua]	41.66	43.16	up	GO:0005634(nucleus);GO:0016567(protein ubiquitination);GO:0043161(proteasome-mediated ubiquitin-dependent protein catabolic process);GO:0061630(ubiquitin protein ligase activity)	-	Y
csi-miR168-5p	TCGCTTGGTGCAGGTCGGGAA	up	TRINITY_DN118311_c0_g1	Heat shock cognate 70 kDa protein isoform D [Glycine soja]	4.21	0.94	down	GO:0005524(ATP binding);GO:0005618(cell wall);GO:0005634(nucleus);GO:0005739(mitochondrion);GO:0005774(vacuolar membrane);GO:0005794(Golgi apparatus);GO:0005829(cytosol);GO:0005886(plasma membrane);GO:0006351(transcription, DNA-templated);GO:0006355(regulation of transcription, DNA-templated);GO:0006457(protein folding);GO:0006986(response to unfolded protein);GO:0009266(response to temperature s…	ko03040(Spliceosome);ko04141(Protein processing in endoplasmic reticulum);ko04144(Endocytosis)	Y
csi-miR168-5p	TCGCTTGGTGCAGGTCGGGAA	up	TRINITY_DN120252_c1_g2	Ankyrin repeat-containing protein [Artemisia annua]	6.21	5.29	down	GO:0003674(molecular_function);GO:0005634(nucleus);GO:0005886(plasma membrane);GO:0008150(biological_process)	-	Y
csi-miR168-5p	TCGCTTGGTGCAGGTCGGGAA	up	TRINITY_DN123491_c2_g2	protein argonaute 1A [Artemisia annua]	17.73	10.61	down	GO:0005515(protein binding)	-	Y
csi-miR168-5p	TCGCTTGGTGCAGGTCGGGAA	up	TRINITY_DN90351_c6_g1	band 7 domain, Stomatin family [Artemisia annua]	101.72	96.58	down	GO:0005515(protein binding);GO:0005773(vacuole);GO:0005774(vacuolar membrane);GO:0005794(Golgi apparatus);GO:0005829(cytosol);GO:0005886(plasma membrane);GO:0009506(plasmodesma);GO:0016020(membrane);GO:0043424(protein histidine kinase binding)	-	Y
mtr-miR166a_R-2	TCGGACCAGGCTTCATTCC	up	TRINITY_DN102028_c0_g1	probable carboxylesterase SOBER1-like [Lactuca sativa]	16.1	15.72	down	GO:0002084(protein depalmitoylation);GO:0005737(cytoplasm);GO:0008474(palmitoyl-(protein) hydrolase activity);GO:0052689(carboxylic ester hydrolase activity)	ko00564(Glycerophospholipid metabolism)	Y
mtr-miR166a_R-2	TCGGACCAGGCTTCATTCC	up	TRINITY_DN105055_c6_g2	tubulin folding cofactor B [Artemisia annua]	9.17	11.34	up	GO:0005515(protein binding);GO:0005634(nucleus);GO:0005737(cytoplasm);GO:0005829(cytosol);GO:0007021(tubulin complex assembly);GO:0009524(phragmoplast);GO:0009793(embryo development ending in seed dormancy);GO:0051301(cell division)	-	Y
mtr-miR166a_R-2	TCGGACCAGGCTTCATTCC	up	TRINITY_DN105203_c1_g4	Eukaryotic translation initiation factor 3 subunit 8, N-terminal [Artemisia annua]	36.71	32.71	down	GO:0003743(translation initiation factor activity);GO:0005852(eukaryotic translation initiation factor 3 complex);GO:0006413(translational initiation);GO:0031369(translation initiation factor binding)	ko03013(RNA transport)	Y
mtr-miR166a_R-2	TCGGACCAGGCTTCATTCC	up	TRINITY_DN105402_c6_g1	PPC domain-containing protein [Artemisia annua]	24.89	25.5	down	GO:0004674(protein serine/threonine kinase activity);GO:0004712(protein serine/threonine/tyrosine kinase activity);GO:0005524(ATP binding);GO:0005737(cytoplasm);GO:0007229(integrin-mediated signaling pathway);GO:0016301(kinase activity);GO:0046777(protein autophosphorylation)	-	Y
mtr-miR166a_R-2	TCGGACCAGGCTTCATTCC	up	TRINITY_DN105847_c0_g1	RNA-binding (RRM/RBD/RNP motifs) family protein [Artemisia annua]	45.06	42.49	down	GO:0000245(spliceosomal complex assembly);GO:0015030(Cajal body)	-	Y
mtr-miR166a_R-2	TCGGACCAGGCTTCATTCC	up	TRINITY_DN108576_c1_g1	putative ribosomal RNA adenine dimethylase family protein [Helianthus annuus]	18.07	18.73	up	GO:0000179(rRNA (adenine-N6,N6-)-dimethyltransferase activity);GO:0005737(cytoplasm)	-	Y
mtr-miR166a_R-2	TCGGACCAGGCTTCATTCC	up	TRINITY_DN108753_c0_g4	hypothetical protein CTI12_AA315090 [Artemisia annua]	9.36	8.97	down	GO:0003674(molecular_function);GO:0008150(biological_process);GO:0009507(chloroplast)	-	Y
mtr-miR166a_R-2	TCGGACCAGGCTTCATTCC	up	TRINITY_DN108876_c1_g1	phospholipase D [Artemisia annua]	10.29	7.83	down	GO:0003824(catalytic activity);GO:0004630(phospholipase D activity);GO:0005515(protein binding);GO:0005546(phosphatidylinositol-4,5-bisphosphate binding);GO:0005634(nucleus);GO:0005737(cytoplasm);GO:0009506(plasmodesma);GO:0009816(defense response to bacterium, incompatible interaction);GO:0016020(membrane);GO:0016042(lipid catabolic process);GO:0046686(response to cadmium ion);GO:0070290(N-acylp…	ko00564(Glycerophospholipid metabolism);ko00565(Ether lipid metabolism);ko04144(Endocytosis)	Y
mtr-miR166a_R-2	TCGGACCAGGCTTCATTCC	up	TRINITY_DN108985_c0_g3	GSK3/SHAGGY-like protein kinase 1 [Artemisia annua]	61.51	69.97	up	GO:0004674(protein serine/threonine kinase activity);GO:0005515(protein binding);GO:0005524(ATP binding);GO:0006468(protein phosphorylation);GO:0009507(chloroplast);GO:0009742(brassinosteroid mediated signaling pathway);GO:0016301(kinase activity);GO:0032880(regulation of protein localization)	ko04075(Plant hormone signal transduction)	Y
mtr-miR166a_R-2	TCGGACCAGGCTTCATTCC	up	TRINITY_DN109792_c2_g2	hypothetical protein CTI12_AA111940 [Artemisia annua]	5.47	6.39	up	GO:0003674(molecular_function);GO:0005634(nucleus);GO:0005829(cytosol);GO:0008150(biological_process)	-	Y
mtr-miR166a_R-2	TCGGACCAGGCTTCATTCC	up	TRINITY_DN110126_c2_g2	protein disulfide isomerase-like 2-3 [Artemisia annua]	45.48	36.62	down	GO:0003756(protein disulfide isomerase activity);GO:0005783(endoplasmic reticulum);GO:0006457(protein folding);GO:0034976(response to endoplasmic reticulum stress)	ko04141(Protein processing in endoplasmic reticulum)	Y
mtr-miR166a_R-2	TCGGACCAGGCTTCATTCC	up	TRINITY_DN111589_c0_g1	homeobox protein [Artemisia annua]	37.51	30.82	down	GO:0003677(DNA binding);GO:0003700(DNA binding transcription factor activity);GO:0005634(nucleus);GO:0006351(transcription, DNA-templated);GO:0006355(regulation of transcription, DNA-templated);GO:0008284(positive regulation of cell proliferation);GO:0008289(lipid binding);GO:0009733(response to auxin);GO:0010014(meristem initiation);GO:0010067(procambium histogenesis);GO:0010072(primary shoot ap…	-	Y
mtr-miR166a_R-2	TCGGACCAGGCTTCATTCC	up	TRINITY_DN113280_c2_g1	Armadillo-type fold [Artemisia annua]	11.08	10.23	down	GO:0000159(protein phosphatase type 2A complex);GO:0005515(protein binding);GO:0005634(nucleus);GO:0005737(cytoplasm);GO:0005829(cytosol);GO:0006555(methionine metabolic process);GO:0006952(defense response);GO:0007165(signal transduction);GO:0008266(poly(U) RNA binding);GO:0009742(brassinosteroid mediated signaling pathway);GO:0009759(indole glucosinolate biosynthetic process);GO:0009908(flower …	ko03015(mRNA surveillance pathway)	Y
mtr-miR166a_R-2	TCGGACCAGGCTTCATTCC	up	TRINITY_DN113882_c0_g1	hypothetical protein CTI12_AA304170 [Artemisia annua]	3.46	3.86	up	GO:0005515(protein binding);GO:0005622(intracellular);GO:0005623(cell);GO:0005634(nucleus);GO:0009507(chloroplast);GO:0009536(plastid);GO:0009706(chloroplast inner membrane);GO:0009941(chloroplast envelope);GO:0045037(protein import into chloroplast stroma)	-	Y
mtr-miR166a_R-2	TCGGACCAGGCTTCATTCC	up	TRINITY_DN114836_c1_g1	hydroxyproline-rich glycoprotein family protein [Artemisia annua]	12.19	9.79	down	GO:0006357(regulation of transcription by RNA polymerase II);GO:0070847(core mediator complex)	-	Y
mtr-miR166a_R-2	TCGGACCAGGCTTCATTCC	up	TRINITY_DN116772_c1_g3	homeobox-leucine zipper family protein / lipid-binding START domain-containing protein [Artemisia annua]	17.62	14.44	down	GO:0003677(DNA binding);GO:0003700(DNA binding transcription factor activity);GO:0005634(nucleus);GO:0006351(transcription, DNA-templated);GO:0006355(regulation of transcription, DNA-templated);GO:0008289(lipid binding);GO:0009855(determination of bilateral symmetry);GO:0009944(polarity specification of adaxial/abaxial axis);GO:0009956(radial pattern formation);GO:0010014(meristem initiation);GO:…	-	Y
mtr-miR166a_R-2	TCGGACCAGGCTTCATTCC	up	TRINITY_DN119566_c0_g1	poly(A) binding protein 2 [Artemisia annua]	26.02	21.7	down	GO:0000184(nuclear-transcribed mRNA catabolic process, nonsense-mediated decay);GO:0003723(RNA binding);GO:0003729(mRNA binding);GO:0003743(translation initiation factor activity);GO:0005515(protein binding);GO:0005634(nucleus);GO:0005829(cytosol);GO:0006413(translational initiation);GO:0006446(regulation of translational initiation);GO:0009651(response to salt stress);GO:0016032(viral process);G…	ko03013(RNA transport);ko03015(mRNA surveillance pathway);ko03018(RNA degradation)	Y
mtr-miR166a_R-2	TCGGACCAGGCTTCATTCC	up	TRINITY_DN120688_c0_g1	Poly(ADP-ribose) polymerase, catalytic domain-containing protein [Artemisia annua]	38.48	38.95	up	GO:0000303(response to superoxide);GO:0003950(NAD+ ADP-ribosyltransferase activity);GO:0005515(protein binding);GO:0005634(nucleus);GO:0005737(cytoplasm);GO:0006809(nitric oxide biosynthetic process);GO:0006970(response to osmotic stress);GO:0006979(response to oxidative stress);GO:0009414(response to water deprivation);GO:0009651(response to salt stress);GO:0009723(response to ethylene);GO:00097…	ko03022(Basal transcription factors)	Y
mtr-miR166a_R-2	TCGGACCAGGCTTCATTCC	up	TRINITY_DN121689_c0_g2	START domain, Homeodomain-like, MEKHLA, START-like domain protein [Artemisia annua]	6.04	5.99	down	GO:0003677(DNA binding);GO:0003700(DNA binding transcription factor activity);GO:0005634(nucleus);GO:0006351(transcription, DNA-templated);GO:0006355(regulation of transcription, DNA-templated);GO:0008289(lipid binding);GO:0009855(determination of bilateral symmetry);GO:0009965(leaf morphogenesis);GO:0010014(meristem initiation);GO:0010073(meristem maintenance);GO:0010075(regulation of meristem g…	-	Y
mtr-miR166a_R-2	TCGGACCAGGCTTCATTCC	up	TRINITY_DN122682_c1_g2	homeobox leucine-zipper protein [Artemisia annua]	8.1	7.2	down	GO:0003677(DNA binding);GO:0003700(DNA binding transcription factor activity);GO:0005634(nucleus);GO:0006351(transcription, DNA-templated);GO:0006355(regulation of transcription, DNA-templated);GO:0008289(lipid binding);GO:0009855(determination of bilateral symmetry);GO:0009944(polarity specification of adaxial/abaxial axis);GO:0009956(radial pattern formation);GO:0010014(meristem initiation);GO:…	-	Y
mtr-miR166a_R-2	TCGGACCAGGCTTCATTCC	up	TRINITY_DN123059_c2_g2	phosphomethylpyrimidine synthase [Artemisia annua]	36.38	82.31	up	GO:0003824(catalytic activity);GO:0009228(thiamine biosynthetic process);GO:0009229(thiamine diphosphate biosynthetic process);GO:0009507(chloroplast);GO:0009536(plastid);GO:0009570(chloroplast stroma);GO:0010266(response to vitamin B1);GO:0016045(detection of bacterium);GO:0016830(carbon-carbon lyase activity);GO:0046872(metal ion binding);GO:0051536(iron-sulfur cluster binding);GO:0051539(4 iro…	ko00730(Thiamine metabolism)	Y
mtr-miR166a_R-2	TCGGACCAGGCTTCATTCC	up	TRINITY_DN124857_c2_g2	hypothetical protein CTI12_AA147430 [Artemisia annua]	8.31	9.87	up	GO:0003674(molecular_function);GO:0005634(nucleus);GO:0009908(flower development);GO:0030154(cell differentiation)	ko03013(RNA transport)	Y
mtr-miR166a_R-2	TCGGACCAGGCTTCATTCC	up	TRINITY_DN92032_c7_g1	-	5.37	5.68	up	-	-	Y
mtr-miR166a_R-2	TCGGACCAGGCTTCATTCC	up	TRINITY_DN92388_c0_g2	hypothetical protein CTI12_AA318470 [Artemisia annua]	64.66	86.96	up	GO:0006364(rRNA processing);GO:0030687(preribosome, large subunit precursor)	-	Y
mtr-miR166a_R-2	TCGGACCAGGCTTCATTCC	up	TRINITY_DN92544_c1_g1	-	4.28	4.71	up	-	-	Y
mtr-miR166a_R-2	TCGGACCAGGCTTCATTCC	up	TRINITY_DN93159_c0_g2	Membrane bound O-acyl transferase, MBOAT [Artemisia annua]	65.6	79.56	up	GO:0005576(extracellular region);GO:0005783(endoplasmic reticulum);GO:0005886(plasma membrane);GO:0008654(phospholipid biosynthetic process);GO:0016020(membrane);GO:0016746(transferase activity, transferring acyl groups);GO:0019375(galactolipid biosynthetic process);GO:0019432(triglyceride biosynthetic process);GO:0045017(glycerolipid biosynthetic process);GO:0071617(lysophospholipid acyltransfer…	ko00561(Glycerolipid metabolism);ko00564(Glycerophospholipid metabolism);ko00565(Ether lipid metabolism)	Y
mtr-miR166a_R-2	TCGGACCAGGCTTCATTCC	up	TRINITY_DN93512_c0_g1	nascent polypeptide-associated complex subunit alpha-like protein 1 [Artemisia annua]	73.05	65.43	down	GO:0005634(nucleus);GO:0005794(Golgi apparatus);GO:0005829(cytosol);GO:0005854(nascent polypeptide-associated complex);GO:0009506(plasmodesma);GO:0009651(response to salt stress);GO:0015031(protein transport);GO:0022626(cytosolic ribosome)	-	Y
mtr-miR166a_R-2	TCGGACCAGGCTTCATTCC	up	TRINITY_DN95455_c0_g2	-	28.09	29.62	down	-	-	Y
mtr-miR166a_R-2	TCGGACCAGGCTTCATTCC	up	TRINITY_DN98248_c0_g2	polyphenol oxidase F protein [Artemisia annua]	23.79	25.96	up	GO:0004097(catechol oxidase activity)	ko00350(Tyrosine metabolism);ko00950(Isoquinoline alkaloid biosynthesis)	Y
mtr-miR166a_R-2	TCGGACCAGGCTTCATTCC	up	TRINITY_DN98737_c6_g2	hypothetical protein CTI12_AA498890 [Artemisia annua]	126.94	143.96	up	-	-	Y
mtr-miR166a_R-2	TCGGACCAGGCTTCATTCC	up	TRINITY_DN99324_c0_g1	hypothetical protein CTI12_AA543480 [Artemisia annua]	6.8	14.75	up	GO:0003723(RNA binding);GO:0003735(structural constituent of ribosome);GO:0006412(translation);GO:0022625(cytosolic large ribosomal subunit);GO:0042254(ribosome biogenesis)	-	Y
mtr-miR166a_R-2	TCGGACCAGGCTTCATTCC	up	TRINITY_DN99536_c0_g3	Plant specific eukaryotic initiation factor 4B [Artemisia annua]	44.18	32.68	down	GO:0003729(mRNA binding);GO:0003743(translation initiation factor activity);GO:0005634(nucleus);GO:0006413(translational initiation)	-	Y
mtr-miR398a-3p_1ss21TC	TGTGTTCTCAGGTCACCCCTC	down	TRINITY_DN105234_c5_g1	protein kinase-like domain, Phloem protein 2-like protein [Artemisia annua]	6.46	4.69	down	-	-	Y
mtr-miR398a-3p_1ss21TC	TGTGTTCTCAGGTCACCCCTC	down	TRINITY_DN110642_c2_g2	Glycoside hydrolase, catalytic domain-containing protein [Artemisia annua]	23.07	19.54	down	GO:0003723(RNA binding);GO:0005634(nucleus);GO:0006351(transcription, DNA-templated);GO:0006355(regulation of transcription, DNA-templated);GO:0009507(chloroplast);GO:0046872(metal ion binding)	-	Y
mtr-miR398a-3p_1ss21TC	TGTGTTCTCAGGTCACCCCTC	down	TRINITY_DN118599_c0_g1	Aux/IAA-ARF-dimerization [Artemisia annua]	84.27	55.56	down	GO:0003700(DNA binding transcription factor activity);GO:0005515(protein binding);GO:0005634(nucleus);GO:0006351(transcription, DNA-templated);GO:0006355(regulation of transcription, DNA-templated);GO:0009734(auxin-activated signaling pathway);GO:0043565(sequence-specific DNA binding)	ko04075(Plant hormone signal transduction)	Y
mtr-miR398a-3p_1ss21TC	TGTGTTCTCAGGTCACCCCTC	down	TRINITY_DN118743_c0_g1	Thiolase [Artemisia annua]	87.89	93.8	up	GO:0003988(acetyl-CoA C-acyltransferase activity);GO:0005730(nucleolus);GO:0005739(mitochondrion);GO:0005774(vacuolar membrane);GO:0005777(peroxisome);GO:0005829(cytosol);GO:0006635(fatty acid beta-oxidation);GO:0009507(chloroplast);GO:0009514(glyoxysome);GO:0009611(response to wounding);GO:0009695(jasmonic acid biosynthetic process);GO:0009789(positive regulation of abscisic acid-activated signa…	ko00071(Fatty acid degradation);ko00592(alpha-Linolenic acid metabolism);ko01040(Biosynthesis of unsaturated fatty acids);ko00280(Valine, leucine and isoleucine degradation);ko04146(Peroxisome)	Y
mtr-miR398a-3p_1ss21TC	TGTGTTCTCAGGTCACCCCTC	down	TRINITY_DN121349_c0_g1	CCT domain-containing protein [Artemisia annua]	11.65	17.01	up	GO:0000156(phosphorelay response regulator activity);GO:0000160(phosphorelay signal transduction system);GO:0003677(DNA binding);GO:0005634(nucleus);GO:0005739(mitochondrion);GO:0006351(transcription, DNA-templated);GO:0006355(regulation of transcription, DNA-templated);GO:0007623(circadian rhythm);GO:0009266(response to temperature stimulus);GO:0010017(red or far-red light signaling pathway);GO:…	ko04712(Circadian rhythm - plant)	Y
mtr-miR398a-3p_1ss21TC	TGTGTTCTCAGGTCACCCCTC	down	TRINITY_DN122683_c2_g2	bifunctional polymyxin resistance protein, ArnA [Artemisia annua]	5.48	10.31	up	GO:0003824(catalytic activity);GO:0005575(cellular_component);GO:0009408(response to heat);GO:0009414(response to water deprivation);GO:0009737(response to abscisic acid);GO:0009809(lignin biosynthetic process);GO:0016621(cinnamoyl-CoA reductase activity);GO:0046686(response to cadmium ion);GO:0050662(coenzyme binding)	ko00940(Phenylpropanoid biosynthesis)	Y
mtr-miR398a-3p_1ss21TC	TGTGTTCTCAGGTCACCCCTC	down	TRINITY_DN123102_c0_g2	superoxide dismutase [Cu-Zn], chloroplastic [Helianthus annuus]	1.99	3.95	up	GO:0004784(superoxide dismutase activity);GO:0005507(copper ion binding);GO:0005737(cytoplasm);GO:0008270(zinc ion binding);GO:0019430(removal of superoxide radicals)	ko04146(Peroxisome)	Y
mtr-miR398a-3p_1ss21TC	TGTGTTCTCAGGTCACCCCTC	down	TRINITY_DN124647_c1_g1	Nucleotide-binding, alpha-beta plait [Artemisia annua]	15.32	13.65	down	-	ko03015(mRNA surveillance pathway)	Y
mtr-miR398a-3p_1ss21TC	TGTGTTCTCAGGTCACCCCTC	down	TRINITY_DN96068_c0_g2	copper chaperone for SOD1 [Artemisia annua]	22.5	26.93	up	GO:0004784(superoxide dismutase activity);GO:0005507(copper ion binding);GO:0005737(cytoplasm);GO:0008270(zinc ion binding);GO:0019430(removal of superoxide radicals)	ko04146(Peroxisome)	Y
mtr-miR398a-3p_1ss21TC	TGTGTTCTCAGGTCACCCCTC	down	TRINITY_DN97624_c8_g1	-	2845.03	2410.79	down	GO:0008234(cysteine-type peptidase activity)	-	Y
mtr-miR398a-5p_2ss12GC21AT	GGAGTGACACTCAGAACACATG	down	TRINITY_DN102787_c0_g1	hypothetical protein CTI12_AA198490 [Artemisia annua]	22.2	18.48	down	GO:0005634(nucleus);GO:0008150(biological_process);GO:0016874(ligase activity)	-	Y
mtr-miR398a-5p_2ss12GC21AT	GGAGTGACACTCAGAACACATG	down	TRINITY_DN117385_c1_g3	PH, RCC1 and FYVE domains-containing protein 1-like isoform X3 [Cynara cardunculus var. scolymus]	8.88	8.2	down	GO:0003682(chromatin binding);GO:0005634(nucleus);GO:0005886(plasma membrane);GO:0008270(zinc ion binding);GO:0008536(Ran GTPase binding)	ko04120(Ubiquitin mediated proteolysis)	Y
nta-miR168d	TCGCTTGGTGCAGGTCGGGAA	up	TRINITY_DN115129_c0_g2	-	6.72	8.68	up	-	-	Y
nta-miR168d	TCGCTTGGTGCAGGTCGGGAA	up	TRINITY_DN118311_c0_g1	Heat shock cognate 70 kDa protein isoform D [Glycine soja]	4.21	0.94	down	GO:0005524(ATP binding);GO:0005618(cell wall);GO:0005634(nucleus);GO:0005739(mitochondrion);GO:0005774(vacuolar membrane);GO:0005794(Golgi apparatus);GO:0005829(cytosol);GO:0005886(plasma membrane);GO:0006351(transcription, DNA-templated);GO:0006355(regulation of transcription, DNA-templated);GO:0006457(protein folding);GO:0006986(response to unfolded protein);GO:0009266(response to temperature s…	ko03040(Spliceosome);ko04141(Protein processing in endoplasmic reticulum);ko04144(Endocytosis)	Y
nta-miR168d	TCGCTTGGTGCAGGTCGGGAA	up	TRINITY_DN120189_c1_g2	NF-Y protein [Artemisia annua]	7.01	6.08	down	GO:0003677(DNA binding);GO:0003700(DNA binding transcription factor activity);GO:0005634(nucleus);GO:0006351(transcription, DNA-templated);GO:0006355(regulation of transcription, DNA-templated);GO:0009793(embryo development ending in seed dormancy);GO:0010262(somatic embryogenesis);GO:0016602(CCAAT-binding factor complex);GO:0048316(seed development);GO:0048510(regulation of timing of transition …	-	Y
nta-miR168d	TCGCTTGGTGCAGGTCGGGAA	up	TRINITY_DN123491_c2_g2	protein argonaute 1A [Artemisia annua]	17.73	10.61	down	GO:0005515(protein binding)	-	Y
nta-miR168d	TCGCTTGGTGCAGGTCGGGAA	up	TRINITY_DN123580_c1_g1	degP protease 7 [Artemisia annua]	21.24	17.17	down	GO:0004252(serine-type endopeptidase activity);GO:0005634(nucleus);GO:0005829(cytosol);GO:0006508(proteolysis);GO:0008233(peptidase activity);GO:0008236(serine-type peptidase activity);GO:0009507(chloroplast);GO:0010205(photoinhibition)	-	Y
nta-miR168d	TCGCTTGGTGCAGGTCGGGAA	up	TRINITY_DN91670_c0_g1	myb domain [Artemisia annua]	153.07	154.95	up	GO:0003677(DNA binding);GO:0003700(DNA binding transcription factor activity);GO:0005634(nucleus);GO:0006351(transcription, DNA-templated);GO:0006355(regulation of transcription, DNA-templated)	-	Y
nta-miR168d	TCGCTTGGTGCAGGTCGGGAA	up	TRINITY_DN98778_c0_g1	hypothetical protein BVRB_025610 [Beta vulgaris subsp. vulgaris]	2.46	0.51	down	-	-	Y
aly-miR393a-5p	TCCAAAGGGATCGCATTGATCC	down	TRINITY_DN114227_c0_g3	threonyl-tRNA synthetase [Artemisia annua]	36.15	44.22	up	GO:0003723(RNA binding);GO:0004829(threonine-tRNA ligase activity);GO:0005737(cytoplasm);GO:0006435(threonyl-tRNA aminoacylation)	ko00970(Aminoacyl-tRNA biosynthesis)	Y
aly-miR393a-5p	TCCAAAGGGATCGCATTGATCC	down	TRINITY_DN114389_c0_g1	RNA-binding (RRM/RBD/RNP motifs) family protein [Artemisia annua]	10.61	12.24	up	GO:0003677(DNA binding);GO:0003723(RNA binding);GO:0003729(mRNA binding);GO:0004518(nuclease activity);GO:0005575(cellular_component);GO:0008150(biological_process);GO:0046872(metal ion binding)	-	Y
aly-miR393a-5p	TCCAAAGGGATCGCATTGATCC	down	TRINITY_DN118681_c1_g2	SBP-like protein, partial [Chrysanthemum x morifolium]	13.98	16.2	up	-	-	Y
aly-miR393a-5p	TCCAAAGGGATCGCATTGATCC	down	TRINITY_DN123650_c1_g4	hypothetical protein LSAT_9X4820 [Lactuca sativa]	53.42	67.24	up	GO:0000822(inositol hexakisphosphate binding);GO:0009734(auxin-activated signaling pathway)	ko04075(Plant hormone signal transduction)	Y
aly-miR393a-5p	TCCAAAGGGATCGCATTGATCC	down	TRINITY_DN85357_c0_g1	hypothetical protein CTI12_AA250570 [Artemisia annua]	7.15	10.04	up	-	-	Y
