# Supplementary figures and images for: Identification of Small RNAs Associated with Salt Stress in Chrysanthemums through High-Throughput Sequencing and Bioinformatics Analysis
Source: MDPI journal article supplement (doi:10.3390/genes14030561), 2023-02-23

# total miRNA nucleotide bias

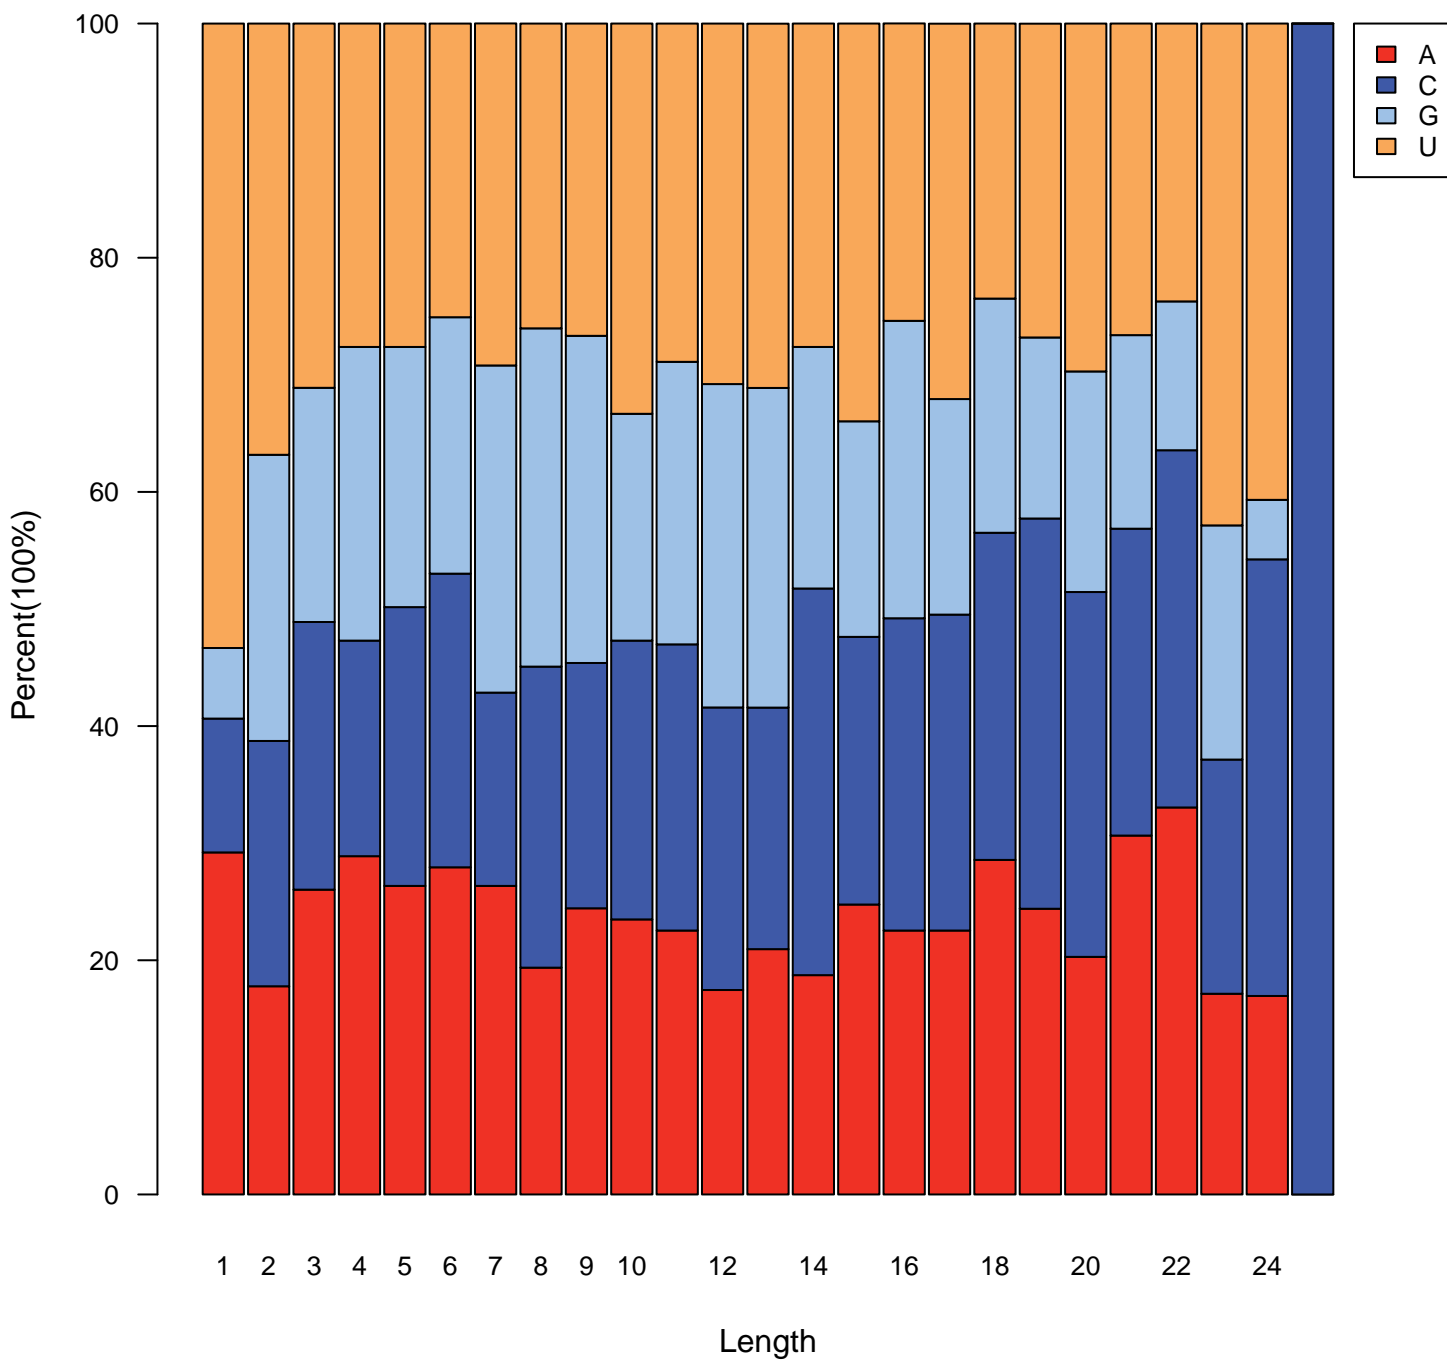

# gp1\_3 miRNA nucleotide bias

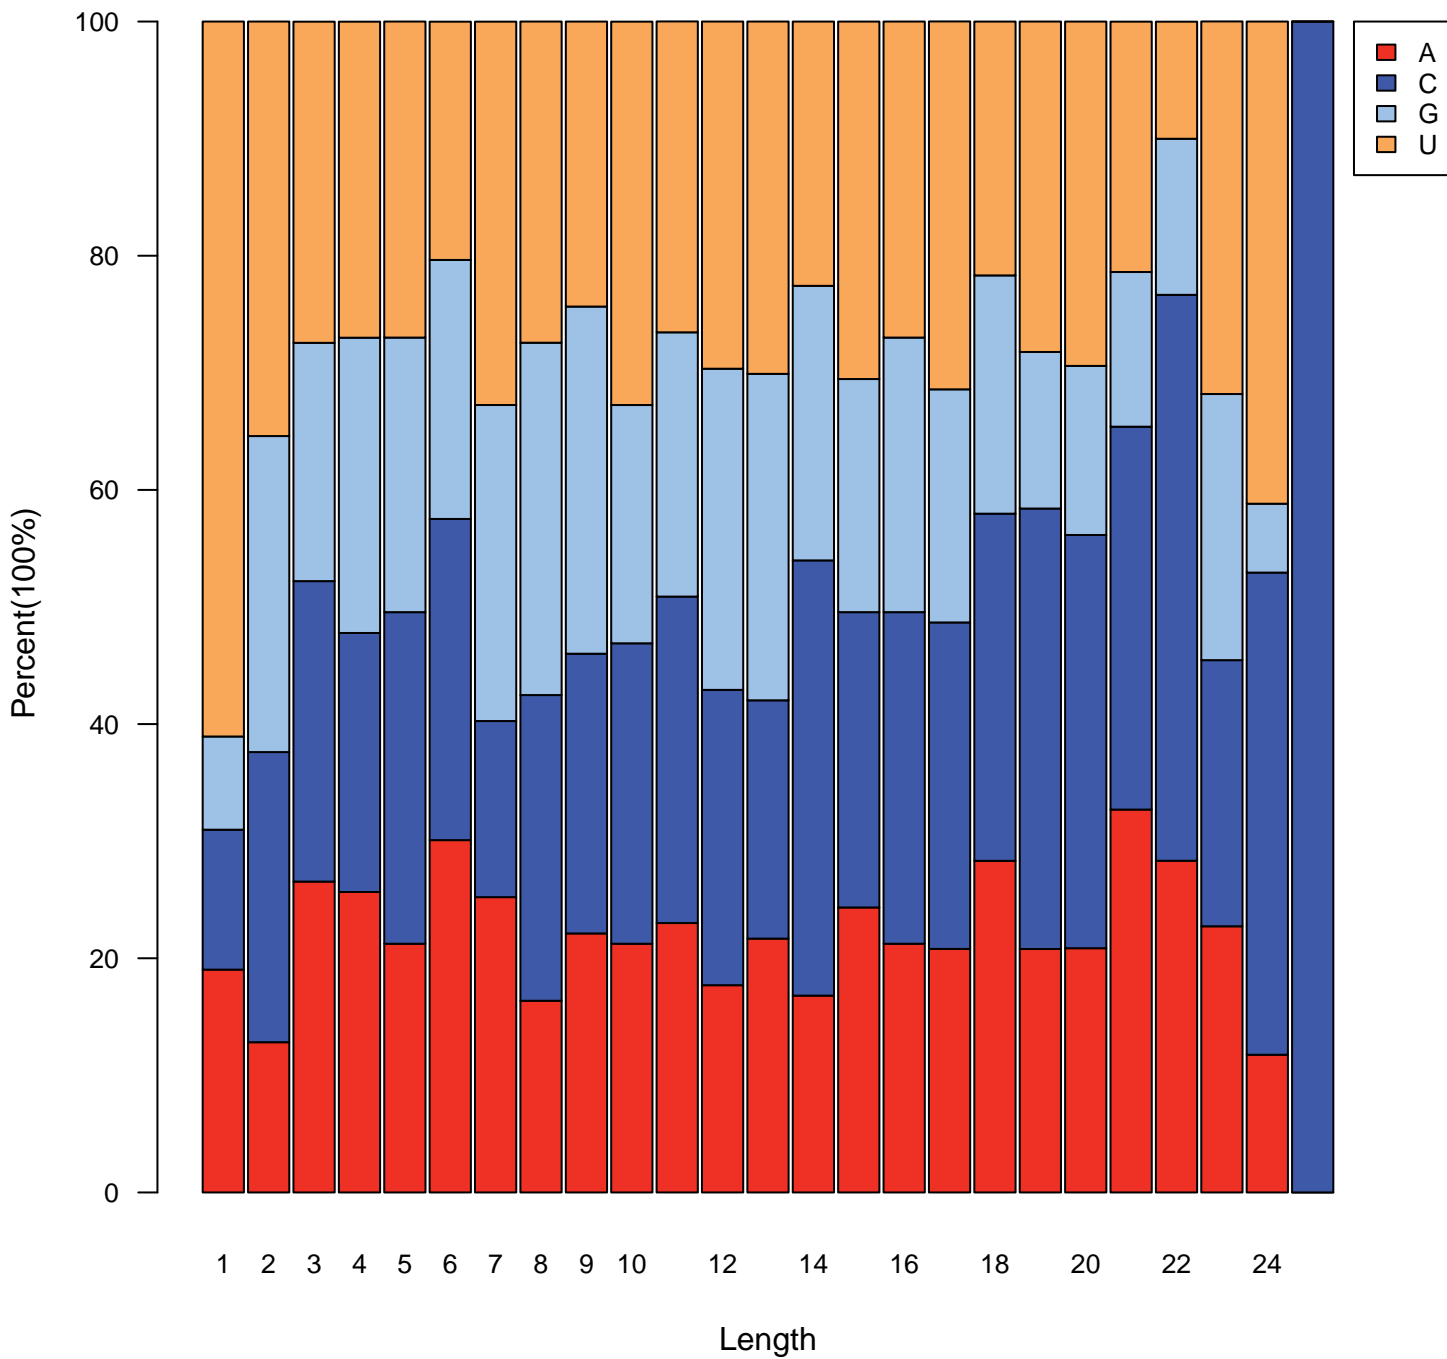

# gp4 miRNA nucleotide bias

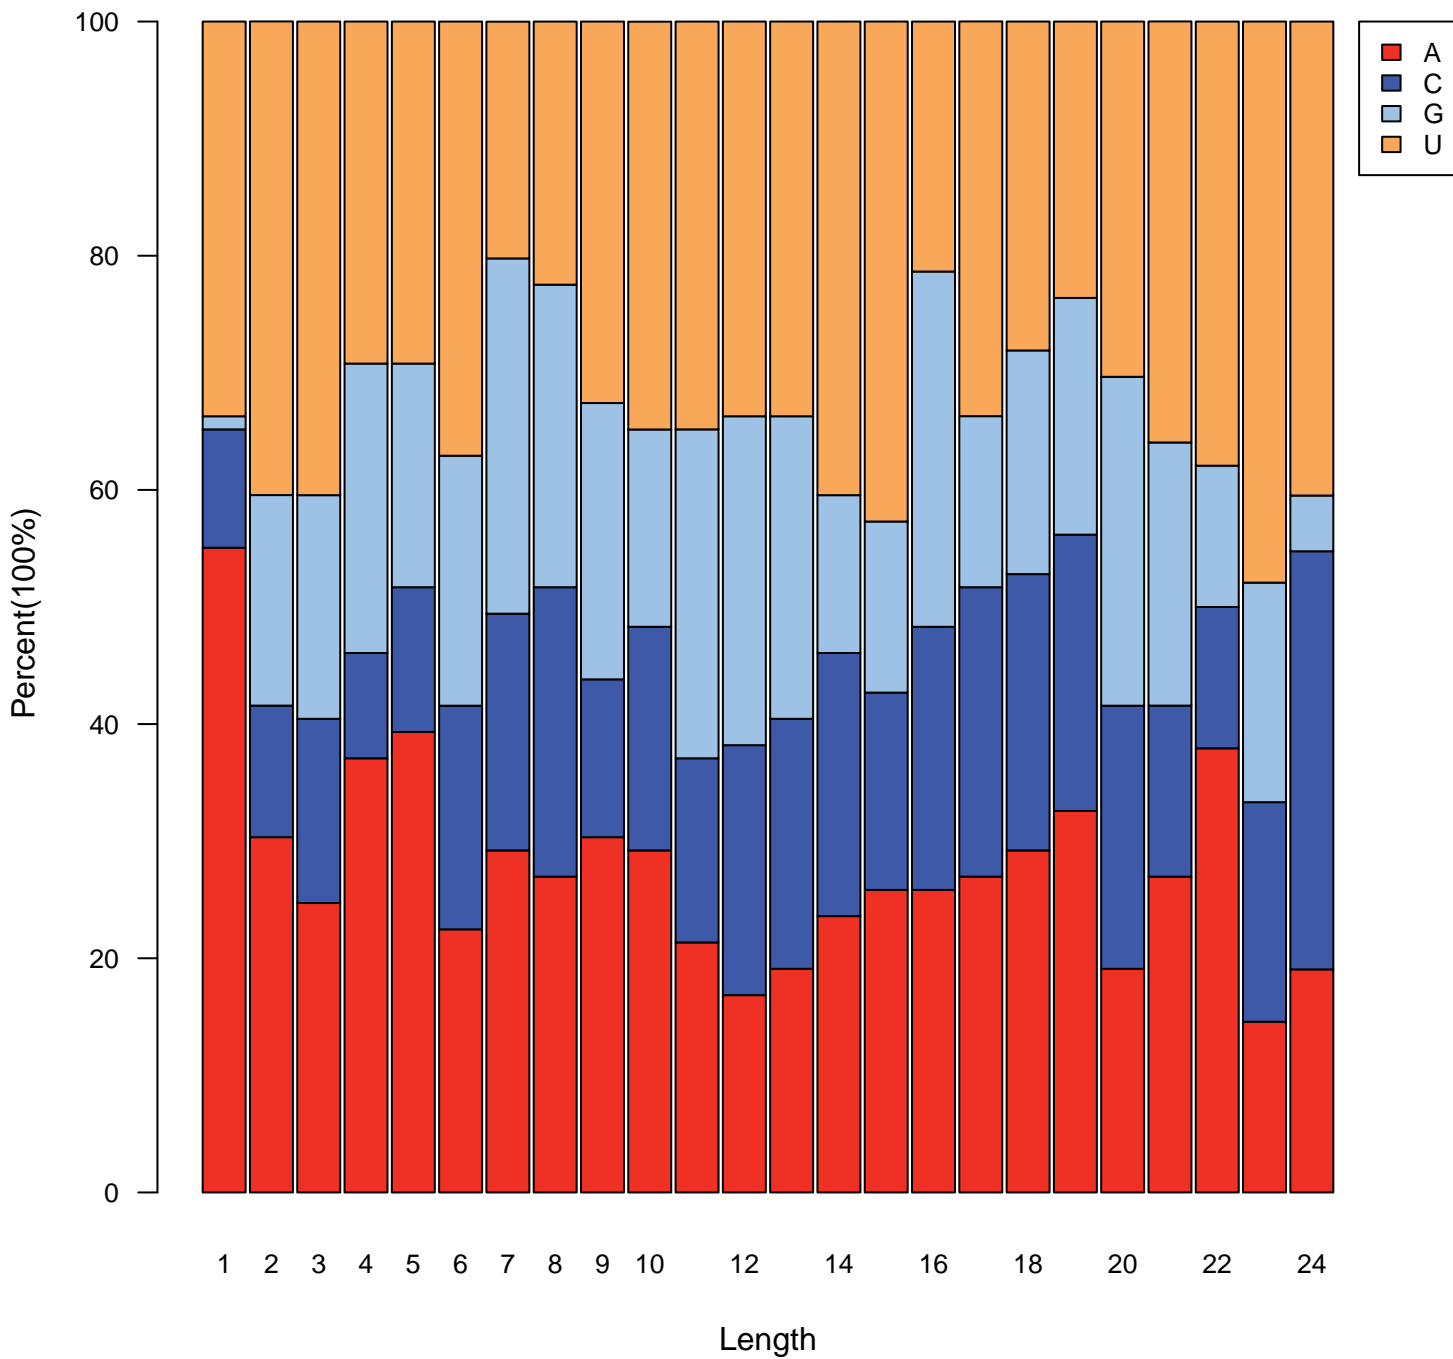

Supplement: s1 [file s1]
